# Supplementary material for: Time-resolved multi-omics analysis reveals the role of nutrient stress-induced resource reallocation for TAG accumulation in oleaginous fungus Mortierella alpina
Source: Biotechnol Biofuels. 2020 Jul 1;13:116. doi: 10.1186/s13068-020-01757-1 (PMC7328260; doi:10.1186/s13068-020-01757-1)
Supplement: Supplementary file 2 — Additional file 2. Qualitative and quantitative of multi-omics data. [file 13068_2020_1757_MOESM2_ESM.xlsx]

## Sheet: Sheet1
Protein IDs	Majority protein IDs	Peptide counts (all)	Peptide counts (razor+unique)	Peptide counts (unique)	Fasta headers	Number of proteins	Peptides	Razor + unique peptides	Unique peptides	Peptides 144-1	Peptides 144-2	Peptides 144-3	Peptides 144-4	Peptides 168-1	Peptides 168-2	Peptides 168-3	Peptides 168-4	Peptides 216-1	Peptides 216-2	Peptides 216-3	Peptides 216-4	Peptides 24-1	Peptides 24-2	Peptides 24-3	Peptides 24-4	Peptides 48-1	Peptides 48-2	Peptides 48-3	Peptides 48-4	Peptides 96-1	Peptides 96-2	Peptides 96-3	Peptides 96-4	Razor + unique peptides 144-1	Razor + unique peptides 144-2	Razor + unique peptides 144-3	Razor + unique peptides 144-4	Razor + unique peptides 168-1	Razor + unique peptides 168-2	Razor + unique peptides 168-3	Razor + unique peptides 168-4	Razor + unique peptides 216-1	Razor + unique peptides 216-2	Razor + unique peptides 216-3	Razor + unique peptides 216-4	Razor + unique peptides 24-1	Razor + unique peptides 24-2	Razor + unique peptides 24-3	Razor + unique peptides 24-4
MA-00002-4	MA-00002-4	3	3	3		1	3	3	3	1	1	1	1	1	0	1	1	1	1	1	1	1	1	0	0	1	0	1	0	2	2	2	1	1	1	1	1	1	0	1	1	1	1	1	1	1	1	0	0
MA-00009-2	MA-00009-2	1	1	1		1	1	1	1	1	0	1	1	0	1	1	0	1	1	1	1	0	1	1	1	0	1	1	1	1	1	1	1	1	0	1	1	0	1	1	0	1	1	1	1	0	1	1	1
MA-00013-4	MA-00013-4	4	4	4		1	4	4	4	3	3	2	1	2	2	2	1	0	0	1	0	3	3	3	3	2	3	3	4	2	2	3	3	3	3	2	1	2	2	2	1	0	0	1	0	3	3	3	3
MA-00014-1	MA-00014-1	10	10	10		1	10	10	10	6	4	7	6	8	6	9	7	6	6	4	9	0	0	0	0	1	0	0	0	2	2	2	3	6	4	7	6	8	6	9	7	6	6	4	9	0	0	0	0
MA-00017-1	MA-00017-1	12	12	12		1	12	12	12	8	8	7	10	9	7	9	9	7	8	8	7	7	8	9	10	9	8	8	9	8	8	9	8	8	8	7	10	9	7	9	9	7	8	8	7	7	8	9	10
MA-00018-1	MA-00018-1	39	39	20		1	39	39	20	30	31	29	30	31	31	32	31	33	32	35	31	34	35	34	34	31	32	28	35	30	29	27	29	30	31	29	30	31	31	32	31	33	32	35	31	34	35	34	34
MA-00018-2	MA-00018-2	10	10	10		1	10	10	10	9	9	9	9	9	9	9	8	8	8	8	9	10	9	9	9	9	9	8	9	8	9	9	9	9	9	9	9	9	9	9	8	8	8	8	9	10	9	9	9
MA-00022-2	MA-00022-2	2	2	2		1	2	2	2	0	0	0	0	0	0	0	0	0	1	0	0	2	2	2	2	2	2	2	2	1	0	1	1	0	0	0	0	0	0	0	0	0	1	0	0	2	2	2	2
MA-00023-14	MA-00023-14	7	7	7		1	7	7	7	2	3	5	3	5	6	3	2	3	4	5	4	1	1	2	0	3	2	1	1	1	3	2	2	2	3	5	3	5	6	3	2	3	4	5	4	1	1	2	0
MA-00023-18	MA-00023-18	5	5	5		1	5	5	5	2	3	3	1	2	1	1	1	2	1	1	1	2	2	1	0	1	1	1	1	1	1	1	1	2	3	3	1	2	1	1	1	2	1	1	1	2	2	1	0
MA-00023-21	MA-00023-21	32	32	32		1	32	32	32	28	26	28	28	27	25	29	28	27	24	24	27	22	30	29	21	28	27	29	28	28	25	27	30	28	26	28	28	27	25	29	28	27	24	24	27	22	30	29	21
MA-00023-29	MA-00023-29	3	3	3		1	3	3	3	2	2	2	2	3	2	2	3	2	2	3	3	2	2	3	3	2	2	2	2	2	2	2	2	2	2	2	2	3	2	2	3	2	2	3	3	2	2	3	3
MA-00023-32	MA-00023-32	11	11	11		1	11	11	11	10	5	8	8	10	8	11	8	10	6	8	8	4	6	5	4	7	6	7	6	8	9	10	9	10	5	8	8	10	8	11	8	10	6	8	8	4	6	5	4
MA-00023-38	MA-00023-38	5	5	5		1	5	5	5	2	2	1	3	3	3	3	3	3	1	2	3	2	1	2	1	2	3	2	2	2	3	2	3	2	2	1	3	3	3	3	3	3	1	2	3	2	1	2	1
MA-00023-39	MA-00023-39	9	9	9		1	9	9	9	8	9	8	9	9	8	9	9	9	7	7	8	8	9	9	9	8	8	9	9	9	9	8	9	8	9	8	9	9	8	9	9	9	7	7	8	8	9	9	9
MA-00023-4	MA-00023-4	2	2	2		1	2	2	2	0	0	1	0	0	1	1	0	0	0	0	0	1	1	1	1	1	2	2	0	0	0	0	1	0	0	1	0	0	1	1	0	0	0	0	0	1	1	1	1
MA-00023-8	MA-00023-8	2	2	2		1	2	2	2	0	1	0	0	1	1	0	0	1	0	0	0	0	0	0	0	0	0	1	1	1	0	0	0	0	1	0	0	1	1	0	0	1	0	0	0	0	0	0	0
MA-00024-2	MA-00024-2	12	11	3		1	12	11	3	11	8	11	11	10	9	11	9	9	9	9	8	9	12	10	9	12	10	9	10	9	7	9	9	10	7	10	10	9	8	10	8	8	8	8	7	8	11	9	8
MA-00025-1	MA-00025-1	5	5	5		1	5	5	5	3	3	3	3	2	2	2	3	2	2	2	2	2	2	2	2	0	1	1	0	1	2	3	3	3	3	3	3	2	2	2	3	2	2	2	2	2	2	2	2
MA-00027-2	MA-00027-2	8	8	7		1	8	8	7	4	4	5	6	5	6	5	5	4	5	3	6	2	2	3	2	1	2	2	4	3	2	4	3	4	4	5	6	5	6	5	5	4	5	3	6	2	2	3	2
MA-00028-16	MA-00028-16	17	15	15		1	17	15	15	13	11	10	10	10	11	11	11	7	9	10	8	10	13	14	9	10	13	12	13	13	9	11	12	11	9	8	8	8	9	9	9	5	7	8	6	8	11	12	7
MA-00028-26	MA-00028-26	7	7	7		1	7	7	7	7	6	6	7	7	6	7	6	6	6	7	6	7	7	5	6	7	6	6	7	7	7	7	6	7	6	6	7	7	6	7	6	6	6	7	6	7	7	5	6
MA-00028-35;MA-00288-35;MA-00288-41;MA-00288-37	MA-00028-35	18;1;1;1	15;1;1;1	15;1;1;1		4	18	15	15	3	3	1	3	0	2	3	1	2	2	1	0	11	12	7	10	4	6	4	4	2	7	1	2	3	3	1	2	0	2	2	1	2	1	0	0	8	9	5	7
MA-00028-48	MA-00028-48	5	5	5		1	5	5	5	2	3	2	3	2	2	3	2	3	1	3	1	3	3	3	3	2	3	4	4	4	3	3	3	2	3	2	3	2	2	3	2	3	1	3	1	3	3	3	3
MA-00034-3	MA-00034-3	1	1	1		1	1	1	1	0	0	0	0	0	0	0	0	0	0	0	0	0	1	0	0	0	0	0	0	0	0	1	0	0	0	0	0	0	0	0	0	0	0	0	0	0	1	0	0
MA-00035-1;MA-00190-40;MA-00270-123;MA-00190-39	MA-00035-1	31;2;1;1	29;2;1;1	27;1;0;1		4	31	29	27	0	1	2	0	2	1	0	1	3	1	1	0	28	27	26	26	18	17	20	22	2	1	0	1	0	1	2	0	2	1	0	1	2	1	1	0	26	25	24	25
MA-00036-1	MA-00036-1	6	4	4		1	6	4	4	0	0	0	0	0	0	0	0	0	0	0	0	4	5	3	4	2	2	4	2	0	0	0	0	0	0	0	0	0	0	0	0	0	0	0	0	2	3	2	2
MA-00038-1	MA-00038-1	12	12	7		1	12	12	7	4	4	5	5	7	6	4	6	5	4	6	3	6	5	5	6	6	4	6	6	6	5	6	5	4	4	5	5	7	6	4	6	5	4	6	3	6	5	5	6
MA-00047-1	MA-00047-1	10	10	10		1	10	10	10	7	6	6	7	6	6	5	7	5	5	5	6	6	4	5	3	6	6	4	4	6	6	8	6	7	6	6	7	6	6	5	7	5	5	5	6	6	4	5	3
MA-00048-3	MA-00048-3	7	7	7		1	7	7	7	2	1	1	4	2	2	4	2	3	2	1	3	5	4	6	3	4	3	6	6	3	3	2	4	2	1	1	4	2	2	4	2	3	2	1	3	5	4	6	3
MA-00049-2	MA-00049-2	1	1	1		1	1	1	1	0	0	0	0	0	0	0	0	0	0	0	0	0	0	0	0	0	0	0	0	1	0	0	0	0	0	0	0	0	0	0	0	0	0	0	0	0	0	0	0
MA-00049-3	MA-00049-3	3	3	3		1	3	3	3	2	3	0	2	2	1	2	1	1	1	1	2	2	2	2	2	3	2	3	2	1	2	2	2	2	3	0	2	2	1	2	1	1	1	1	2	2	2	2	2
MA-00055-1	MA-00055-1	10	9	9		1	10	9	9	7	6	7	6	6	8	6	7	7	8	5	5	9	8	8	9	8	7	7	7	9	7	8	7	6	5	6	5	5	7	5	6	6	7	4	4	8	7	7	8
MA-00055-102	MA-00055-102	4	2	2		1	4	2	2	3	4	4	4	4	3	4	4	4	3	4	4	4	2	3	2	3	4	3	3	4	4	4	4	1	2	2	2	2	1	2	2	2	1	2	2	2	1	1	0
MA-00055-109	MA-00055-109	1	1	1		1	1	1	1	1	1	0	1	1	1	1	1	1	0	1	1	0	1	1	1	1	1	1	1	0	1	0	1	1	1	0	1	1	1	1	1	1	0	1	1	0	1	1	1
MA-00055-11	MA-00055-11	1	1	1		1	1	1	1	0	0	0	0	0	1	1	0	1	0	0	0	0	0	1	0	0	0	1	0	0	0	0	0	0	0	0	0	0	1	1	0	1	0	0	0	0	0	1	0
MA-00055-111	MA-00055-111	6	6	6		1	6	6	6	5	3	4	3	3	3	3	4	2	4	5	5	5	4	5	6	4	5	5	6	5	4	5	4	5	3	4	3	3	3	3	4	2	4	5	5	5	4	5	6
MA-00055-120	MA-00055-120	4	4	4		1	4	4	4	3	3	3	4	4	3	4	4	3	2	3	2	4	3	4	4	4	4	4	4	4	4	3	4	3	3	3	4	4	3	4	4	3	2	3	2	4	3	4	4
MA-00055-123	MA-00055-123	1	1	1		1	1	1	1	0	0	0	0	0	0	0	0	0	1	0	1	0	0	0	0	0	0	0	0	0	0	0	1	0	0	0	0	0	0	0	0	0	1	0	1	0	0	0	0
MA-00055-124	MA-00055-124	1	1	1		1	1	1	1	0	0	0	0	0	0	0	0	0	0	0	0	0	1	1	0	0	0	0	0	0	0	0	0	0	0	0	0	0	0	0	0	0	0	0	0	0	1	1	0
MA-00055-126	MA-00055-126	5	1	1		1	5	1	1	3	2	4	3	2	3	4	2	3	4	5	3	3	4	1	3	3	3	3	2	2	2	2	2	0	0	1	0	0	1	0	0	0	1	1	0	1	1	0	1
MA-00055-129	MA-00055-129	1	1	1		1	1	1	1	1	1	0	1	0	0	0	0	0	0	0	0	1	1	0	0	1	1	0	1	0	1	1	1	1	1	0	1	0	0	0	0	0	0	0	0	1	1	0	0
MA-00055-138	MA-00055-138	5	5	5		1	5	5	5	0	0	1	1	2	2	4	0	1	2	3	3	0	1	1	1	1	2	1	2	0	0	0	0	0	0	1	1	2	2	4	0	1	2	3	3	0	1	1	1
MA-00055-141	MA-00055-141	7	7	7		1	7	7	7	4	4	2	4	4	3	4	3	2	2	2	3	5	3	3	3	2	3	3	3	3	3	3	3	4	4	2	4	4	3	4	3	2	2	2	3	5	3	3	3
MA-00055-143	MA-00055-143	1	1	1		1	1	1	1	0	0	0	0	0	0	0	0	0	0	1	0	0	0	0	0	0	0	0	0	0	0	0	0	0	0	0	0	0	0	0	0	0	0	1	0	0	0	0	0
MA-00055-145	MA-00055-145	9	7	7		1	9	7	7	7	8	7	7	7	7	7	7	8	7	7	7	6	8	8	6	7	7	7	7	6	6	6	7	5	6	5	5	5	5	5	5	6	5	5	5	4	6	6	4
MA-00055-146	MA-00055-146	15	15	15		1	15	15	15	8	9	11	11	11	11	12	11	8	10	10	11	9	7	9	7	8	7	6	5	8	8	9	11	8	9	11	11	11	11	12	11	8	10	10	11	9	7	9	7
MA-00055-147	MA-00055-147	6	6	6		1	6	6	6	1	2	1	3	2	2	2	2	1	1	2	1	3	2	2	3	1	2	2	2	2	1	2	2	1	2	1	3	2	2	2	2	1	1	2	1	3	2	2	3
MA-00055-148	MA-00055-148	9	9	9		1	9	9	9	9	9	7	9	9	8	9	8	8	8	8	8	8	9	8	8	8	9	9	9	8	8	9	9	9	9	7	9	9	8	9	8	8	8	8	8	8	9	8	8
MA-00055-150	MA-00055-150	13	13	13		1	13	13	13	8	10	9	10	10	11	12	8	8	8	7	7	6	7	8	6	8	7	9	11	9	8	10	7	8	10	9	10	10	11	12	8	8	8	7	7	6	7	8	6
MA-00055-151	MA-00055-151	10	10	10		1	10	10	10	10	9	9	8	10	10	8	10	10	9	9	9	1	3	3	4	2	2	4	3	4	6	5	7	10	9	9	8	10	10	8	10	10	9	9	9	1	3	3	4
MA-00055-153	MA-00055-153	7	7	7		1	7	7	7	6	6	7	6	6	6	6	6	6	6	6	6	5	5	5	5	6	6	6	6	6	6	6	6	6	6	7	6	6	6	6	6	6	6	6	6	5	5	5	5
MA-00055-156	MA-00055-156	4	4	4		1	4	4	4	2	2	1	3	3	2	4	2	3	2	2	2	3	2	2	2	0	2	0	0	2	3	1	3	2	2	1	3	3	2	4	2	3	2	2	2	3	2	2	2
MA-00055-160	MA-00055-160	4	4	4		1	4	4	4	2	1	2	2	3	1	3	1	1	1	1	0	1	1	2	1	2	1	3	3	1	1	3	2	2	1	2	2	3	1	3	1	1	1	1	0	1	1	2	1
MA-00055-161	MA-00055-161	1	1	1		1	1	1	1	0	0	0	1	0	1	0	0	1	1	1	1	1	1	0	0	1	1	1	1	1	0	0	1	0	0	0	1	0	1	0	0	1	1	1	1	1	1	0	0
MA-00055-164	MA-00055-164	2	2	2		1	2	2	2	0	1	1	0	0	0	0	0	0	1	0	1	0	0	0	0	0	0	0	0	0	0	0	0	0	1	1	0	0	0	0	0	0	1	0	1	0	0	0	0
MA-00055-167	MA-00055-167	15	15	15		1	15	15	15	9	8	9	8	11	11	9	10	11	10	9	13	6	7	3	7	4	2	6	3	7	7	9	6	9	8	9	8	11	11	9	10	11	10	9	13	6	7	3	7
MA-00055-168	MA-00055-168	19	19	19		1	19	19	19	15	13	9	16	10	10	13	11	12	13	10	10	13	13	15	10	12	11	11	13	14	12	14	13	15	13	9	16	10	10	13	11	12	13	10	10	13	13	15	10
MA-00055-169	MA-00055-169	10	10	10		1	10	10	10	6	4	4	6	8	7	6	5	5	6	6	6	7	6	8	7	6	5	6	6	5	6	6	7	6	4	4	6	8	7	6	5	5	6	6	6	7	6	8	7
MA-00055-17	MA-00055-17	21	12	7		1	21	12	7	7	8	7	7	8	9	9	9	8	8	6	9	16	15	14	16	15	11	11	10	9	7	9	7	0	1	0	0	0	1	0	2	1	0	0	0	10	8	8	9
MA-00055-170	MA-00055-170	1	1	1		1	1	1	1	1	1	1	1	1	1	1	1	1	1	1	1	1	1	1	1	1	1	1	1	1	1	1	1	1	1	1	1	1	1	1	1	1	1	1	1	1	1	1	1
MA-00055-176	MA-00055-176	5	5	5		1	5	5	5	3	1	1	2	3	4	3	2	3	3	5	2	4	2	3	2	4	2	2	3	0	2	1	1	3	1	1	2	3	4	3	2	3	3	5	2	4	2	3	2
MA-00055-178	MA-00055-178	23	23	17		1	23	23	17	17	15	16	16	17	18	19	15	18	15	17	17	18	21	20	18	18	17	18	20	17	16	18	17	17	15	16	16	17	18	19	15	18	15	17	17	18	21	20	18
MA-00055-179	MA-00055-179	1	1	1		1	1	1	1	0	0	0	0	0	0	0	0	0	0	0	0	1	1	1	1	0	1	1	1	0	0	0	0	0	0	0	0	0	0	0	0	0	0	0	0	1	1	1	1
MA-00055-182	MA-00055-182	10	10	10		1	10	10	10	7	7	6	6	7	6	6	6	4	5	4	5	6	6	6	4	6	5	5	9	7	5	7	5	7	7	6	6	7	6	6	6	4	5	4	5	6	6	6	4
MA-00055-186	MA-00055-186	5	5	5		1	5	5	5	4	4	4	5	4	4	4	5	4	4	4	4	5	4	4	3	4	5	4	4	4	4	3	4	4	4	4	5	4	4	4	5	4	4	4	4	5	4	4	3
MA-00055-188	MA-00055-188	5	5	5		1	5	5	5	3	2	2	1	2	1	0	1	1	0	1	0	0	2	1	1	1	1	0	1	2	1	2	3	3	2	2	1	2	1	0	1	1	0	1	0	0	2	1	1
MA-00055-190	MA-00055-190	6	6	6		1	6	6	6	3	3	1	3	3	2	2	4	1	1	0	2	1	5	3	1	0	2	2	2	1	1	2	4	3	3	1	3	3	2	2	4	1	1	0	2	1	5	3	1
MA-00055-196	MA-00055-196	23	23	23		1	23	23	23	19	15	16	17	20	18	19	20	21	18	19	21	6	6	5	7	5	10	8	8	17	15	20	17	19	15	16	17	20	18	19	20	21	18	19	21	6	6	5	7
MA-00055-199	MA-00055-199	3	3	3		1	3	3	3	1	0	2	1	1	1	1	1	1	0	1	2	1	2	2	2	1	1	2	1	1	1	1	1	1	0	2	1	1	1	1	1	1	0	1	2	1	2	2	2
MA-00055-2	MA-00055-2	9	8	8		1	9	8	8	5	3	3	6	4	6	6	5	3	1	3	4	6	6	7	6	5	4	7	6	5	3	4	5	4	2	2	5	3	5	5	4	2	0	2	3	5	5	6	5
MA-00055-20	MA-00055-20	1	1	1		1	1	1	1	1	1	0	1	1	1	1	1	1	0	1	0	0	1	1	1	1	1	1	0	1	1	0	1	1	1	0	1	1	1	1	1	1	0	1	0	0	1	1	1
MA-00055-203	MA-00055-203	10	8	8		1	10	8	8	8	8	7	6	7	7	5	7	7	5	8	9	7	6	7	8	6	9	7	6	6	4	8	5	7	7	6	5	6	6	4	6	6	5	6	7	6	5	6	6
MA-00055-204;MA-00055-202	MA-00055-204	12;2	12;2	10;2		2	12	12	10	3	2	4	3	2	3	2	4	3	1	5	4	5	8	8	8	6	6	7	6	3	4	5	2	3	2	4	3	2	3	2	4	3	1	5	4	5	8	8	8
MA-00055-205	MA-00055-205	3	3	3		1	3	3	3	3	1	1	1	1	2	1	1	1	2	1	2	2	2	3	2	1	1	2	2	2	1	1	3	3	1	1	1	1	2	1	1	1	2	1	2	2	2	3	2
MA-00055-206	MA-00055-206	3	3	3		1	3	3	3	1	1	0	0	1	0	0	1	0	1	0	1	1	3	2	3	1	1	2	2	0	0	0	0	1	1	0	0	1	0	0	1	0	1	0	1	1	3	2	3
MA-00055-207	MA-00055-207	3	3	3		1	3	3	3	0	0	1	0	2	2	1	0	1	1	1	0	1	2	2	2	1	2	1	3	0	0	1	1	0	0	1	0	2	2	1	0	1	1	1	0	1	2	2	2
MA-00055-209	MA-00055-209	14	14	14		1	14	14	14	5	6	4	8	9	5	5	7	6	6	5	4	5	5	5	6	5	4	5	6	7	4	7	7	5	6	4	8	9	5	5	7	6	6	5	4	5	5	5	6
MA-00055-21	MA-00055-21	10	4	4		1	10	4	4	8	9	9	8	8	7	9	8	8	7	8	7	10	8	9	9	9	9	9	8	9	8	8	9	3	3	3	2	2	1	3	3	2	1	2	1	4	2	3	3
MA-00055-210	MA-00055-210	10	10	10		1	10	10	10	8	9	10	10	10	10	10	10	9	8	8	9	8	10	10	7	9	9	9	10	9	8	9	10	8	9	10	10	10	10	10	10	9	8	8	9	8	10	10	7
MA-00055-211	MA-00055-211	5	5	5		1	5	5	5	1	2	1	0	2	2	1	2	0	0	0	0	0	4	4	1	3	3	3	3	3	3	1	3	1	2	1	0	2	2	1	2	0	0	0	0	0	4	4	1
MA-00055-213	MA-00055-213	1	1	1		1	1	1	1	0	0	0	0	0	0	0	0	0	0	0	0	0	0	0	0	0	0	1	0	0	0	0	0	0	0	0	0	0	0	0	0	0	0	0	0	0	0	0	0
MA-00055-216	MA-00055-216	10	10	10		1	10	10	10	7	7	3	5	6	8	6	8	5	6	6	5	4	2	3	4	2	6	5	4	7	5	6	8	7	7	3	5	6	8	6	8	5	6	6	5	4	2	3	4
MA-00055-217	MA-00055-217	9	9	9		1	9	9	9	6	5	6	6	6	5	7	7	6	7	6	5	5	7	6	6	6	6	7	7	6	5	6	6	6	5	6	6	6	5	7	7	6	7	6	5	5	7	6	6
MA-00055-220	MA-00055-220	9	8	8		1	9	8	8	7	8	6	7	7	8	7	7	8	6	8	7	7	8	7	6	7	6	8	8	8	8	7	7	7	8	6	7	7	8	7	7	8	6	8	7	6	8	7	6
MA-00055-222	MA-00055-222	1	1	1		1	1	1	1	1	1	1	0	0	0	0	0	1	1	1	1	0	0	0	0	0	0	0	0	1	0	1	0	1	1	1	0	0	0	0	0	1	1	1	1	0	0	0	0
MA-00055-223	MA-00055-223	6	6	6		1	6	6	6	4	3	4	4	3	4	3	3	5	3	3	5	3	4	5	5	1	5	6	4	3	3	3	3	4	3	4	4	3	4	3	3	5	3	3	5	3	4	5	5
MA-00055-226;MA-00213-36	MA-00055-226;MA-00213-36	2;2	2;2	2;2	;	2	2	2	2	1	1	0	0	1	1	1	0	1	1	0	1	2	2	2	1	1	1	1	1	0	0	1	0	1	1	0	0	1	1	1	0	1	1	0	1	2	2	2	1
MA-00055-229	MA-00055-229	12	12	12		1	12	12	12	5	4	5	5	6	6	5	5	5	4	5	3	4	6	6	4	6	7	7	5	1	4	5	3	5	4	5	5	6	6	5	5	5	4	5	3	4	6	6	4
MA-00055-232	MA-00055-232	3	3	3		1	3	3	3	1	3	3	2	3	2	3	2	3	2	3	2	3	3	3	2	3	3	3	3	2	2	2	2	1	3	3	2	3	2	3	2	3	2	3	2	3	3	3	2
MA-00055-233	MA-00055-233	20	20	19		1	20	20	19	0	0	0	0	1	0	2	0	1	4	2	2	14	13	14	8	7	8	7	8	1	1	3	1	0	0	0	0	1	0	2	0	1	4	2	2	14	13	14	8
MA-00055-234	MA-00055-234	2	2	2		1	2	2	2	1	0	0	0	0	1	1	1	1	0	1	0	0	2	2	1	0	1	0	1	0	0	0	1	1	0	0	0	0	1	1	1	1	0	1	0	0	2	2	1
MA-00055-237	MA-00055-237	4	4	4		1	4	4	4	2	2	3	3	1	3	2	3	3	3	2	3	2	1	0	1	2	2	1	1	1	3	1	2	2	2	3	3	1	3	2	3	3	3	2	3	2	1	0	1
MA-00055-245;MA-00213-48	MA-00055-245	7;1	7;1	7;1		2	7	7	7	2	2	2	3	3	5	3	2	2	2	2	2	2	4	2	3	4	3	4	5	5	3	3	2	2	2	2	3	3	5	3	2	2	2	2	2	2	4	2	3
MA-00055-246	MA-00055-246	1	1	1		1	1	1	1	0	0	0	0	0	0	1	0	1	0	0	0	1	1	1	1	1	1	1	1	1	1	1	0	0	0	0	0	0	0	1	0	1	0	0	0	1	1	1	1
MA-00055-247	MA-00055-247	5	5	5		1	5	5	5	1	0	0	0	1	3	0	0	0	2	0	0	4	3	4	4	1	2	2	2	1	1	0	0	1	0	0	0	1	3	0	0	0	2	0	0	4	3	4	4
MA-00055-249	MA-00055-249	15	15	11		1	15	15	11	7	5	7	7	7	9	8	9	10	7	10	7	8	9	9	9	9	6	7	8	8	7	6	8	7	5	7	7	7	9	8	9	10	7	10	7	8	9	9	9
MA-00055-254	MA-00055-254	3	3	3		1	3	3	3	0	0	0	1	0	1	1	0	1	1	0	0	0	0	0	0	0	2	0	0	0	1	1	0	0	0	0	1	0	1	1	0	1	1	0	0	0	0	0	0
MA-00055-255;MA-00213-29	MA-00055-255	9;4	9;4	9;4		2	9	9	9	7	6	5	6	6	7	6	6	3	7	6	8	3	7	7	5	7	6	7	7	6	5	7	5	7	6	5	6	6	7	6	6	3	7	6	8	3	7	7	5
MA-00055-256	MA-00055-256	2	2	2		1	2	2	2	0	0	1	0	1	1	1	1	0	0	0	0	0	1	2	2	0	1	1	1	0	0	1	1	0	0	1	0	1	1	1	1	0	0	0	0	0	1	2	2
MA-00055-258	MA-00055-258	2	2	2		1	2	2	2	2	2	2	2	2	2	2	2	2	2	2	1	2	2	2	2	2	2	2	2	2	2	2	2	2	2	2	2	2	2	2	2	2	2	2	1	2	2	2	2
MA-00055-260	MA-00055-260	4	4	4		1	4	4	4	0	1	1	0	1	1	1	1	0	1	1	1	1	1	2	1	2	1	1	1	1	1	1	2	0	1	1	0	1	1	1	1	0	1	1	1	1	1	2	1
MA-00055-264	MA-00055-264	13	13	13		1	13	13	13	8	8	5	6	6	10	8	7	5	3	6	6	8	13	11	8	10	11	11	12	8	8	9	8	8	8	5	6	6	10	8	7	5	3	6	6	8	13	11	8
MA-00055-265	MA-00055-265	16	14	14		1	16	14	14	13	15	12	16	14	15	16	13	14	13	14	14	7	10	9	7	10	11	12	10	12	11	12	11	11	13	10	14	12	13	14	11	12	11	12	12	6	8	7	6
MA-00112-246;MA-00055-271	MA-00112-246;MA-00055-271	38;38	38;38	38;38	;	2	38	38	38	32	33	34	33	34	33	34	32	31	28	31	31	31	36	36	32	30	33	35	34	32	33	33	34	32	33	34	33	34	33	34	32	31	28	31	31	31	36	36	32
MA-00055-275	MA-00055-275	1	1	1		1	1	1	1	0	0	0	0	0	0	0	0	0	0	0	0	0	1	0	0	0	0	0	1	0	0	0	0	0	0	0	0	0	0	0	0	0	0	0	0	0	1	0	0
MA-00055-278	MA-00055-278	39	39	39		1	39	39	39	32	35	34	33	33	35	34	32	34	33	33	32	32	36	35	33	33	34	35	36	33	33	36	35	32	35	34	33	33	35	34	32	34	33	33	32	32	36	35	33
MA-00055-285	MA-00055-285	12	12	12		1	12	12	12	7	9	6	6	6	6	8	7	5	7	5	6	7	7	8	4	7	6	6	6	7	7	8	10	7	9	6	6	6	6	8	7	5	7	5	6	7	7	8	4
MA-00055-29	MA-00055-29	6	6	6		1	6	6	6	3	3	4	4	3	6	4	4	4	4	3	4	2	2	0	1	3	2	1	4	3	4	4	4	3	3	4	4	3	6	4	4	4	4	3	4	2	2	0	1
MA-00055-290	MA-00055-290	3	3	3		1	3	3	3	1	1	1	1	1	2	1	1	1	1	1	1	1	1	0	1	0	1	0	1	1	1	1	1	1	1	1	1	1	2	1	1	1	1	1	1	1	1	0	1
MA-00055-297	MA-00055-297	5	4	4		1	5	4	4	3	3	3	3	2	2	2	3	3	3	2	2	4	2	3	3	5	3	3	3	2	2	3	2	2	2	2	2	1	1	1	2	2	2	1	1	3	1	2	2
MA-00055-310	MA-00055-310	1	1	1		1	1	1	1	1	1	1	1	1	0	1	1	1	1	1	1	1	1	1	1	1	1	1	1	1	1	1	1	1	1	1	1	1	0	1	1	1	1	1	1	1	1	1	1
MA-00055-312	MA-00055-312	15	15	15		1	15	15	15	12	13	10	12	13	13	14	14	11	11	11	12	9	12	12	10	10	13	12	12	14	13	13	13	12	13	10	12	13	13	14	14	11	11	11	12	9	12	12	10
MA-00055-319	MA-00055-319	24	22	22		1	24	22	22	22	22	20	21	22	20	21	21	15	18	18	18	17	18	21	19	18	19	18	19	22	23	23	23	20	20	19	19	20	18	20	19	13	16	16	16	15	16	19	17
MA-00055-320	MA-00055-320	11	11	11		1	11	11	11	9	9	8	8	8	9	9	8	9	6	8	7	7	6	7	6	8	8	7	7	5	5	8	7	9	9	8	8	8	9	9	8	9	6	8	7	7	6	7	6
MA-00055-323	MA-00055-323	20	20	20		1	20	20	20	17	16	17	19	17	18	15	18	16	15	16	16	14	17	14	11	15	15	16	17	19	16	18	18	17	16	17	19	17	18	15	18	16	15	16	16	14	17	14	11
MA-00055-324	MA-00055-324	1	1	1		1	1	1	1	0	0	0	0	0	0	0	1	0	0	0	0	0	0	0	0	0	0	0	0	0	0	0	0	0	0	0	0	0	0	0	1	0	0	0	0	0	0	0	0
MA-00055-325	MA-00055-325	3	3	3		1	3	3	3	3	3	2	3	3	3	3	3	3	2	3	3	1	3	2	2	2	2	2	3	3	3	3	3	3	3	2	3	3	3	3	3	3	2	3	3	1	3	2	2
MA-00055-329	MA-00055-329	3	3	3		1	3	3	3	2	3	2	2	2	3	2	3	2	2	3	2	3	2	3	2	2	2	2	2	3	2	3	3	2	3	2	2	2	3	2	3	2	2	3	2	3	2	3	2
MA-00055-33	MA-00055-33	17	17	17		1	17	17	17	14	14	14	15	14	14	12	14	16	14	15	15	13	14	14	12	15	14	13	15	13	12	15	11	14	14	14	15	14	14	12	14	16	14	15	15	13	14	14	12
MA-00055-330;MA-00213-62	MA-00055-330;MA-00213-62	3;2	3;2	3;2	;	2	3	3	3	1	1	1	2	1	2	2	0	2	0	1	1	2	3	2	2	1	1	1	2	1	0	0	2	1	1	1	2	1	2	2	0	2	0	1	1	2	3	2	2
MA-00055-335	MA-00055-335	13	13	13		1	13	13	13	11	11	10	10	11	12	11	11	9	8	9	9	7	10	9	7	8	9	9	11	9	8	10	9	11	11	10	10	11	12	11	11	9	8	9	9	7	10	9	7
MA-00055-34	MA-00055-34	30	29	29		1	30	29	29	19	20	17	16	17	20	18	19	20	22	18	15	15	14	12	11	12	11	12	12	11	16	17	16	18	19	16	15	16	19	17	18	19	21	17	14	14	13	11	10
MA-00055-340	MA-00055-340	183	183	183		1	183	183	183	146	148	146	153	143	147	145	144	99	96	106	100	145	165	163	141	156	165	161	164	161	157	156	165	146	148	146	153	143	147	145	144	99	96	106	100	145	165	163	141
MA-00055-341	MA-00055-341	3	3	3		1	3	3	3	1	2	2	2	1	1	1	1	0	1	0	1	1	3	2	3	3	2	2	3	3	1	1	2	1	2	2	2	1	1	1	1	0	1	0	1	1	3	2	3
MA-00055-344	MA-00055-344	1	1	1		1	1	1	1	0	0	0	1	0	1	1	1	1	1	0	1	0	0	0	1	1	1	1	1	0	0	1	0	0	0	0	1	0	1	1	1	1	1	0	1	0	0	0	1
MA-00055-347	MA-00055-347	10	10	10		1	10	10	10	5	4	2	6	5	4	5	4	5	4	4	4	1	2	3	3	3	2	3	2	6	3	2	3	5	4	2	6	5	4	5	4	5	4	4	4	1	2	3	3
MA-00055-350	MA-00055-350	5	5	5		1	5	5	5	2	0	0	2	1	1	3	2	0	0	0	2	1	3	3	0	1	1	4	3	0	2	1	1	2	0	0	2	1	1	3	2	0	0	0	2	1	3	3	0
MA-00055-360	MA-00055-360	4	4	4		1	4	4	4	2	2	1	1	2	1	3	1	1	1	1	1	2	1	1	1	1	1	2	3	1	2	1	2	2	2	1	1	2	1	3	1	1	1	1	1	2	1	1	1
MA-00055-362	MA-00055-362	1	1	1		1	1	1	1	0	0	0	0	0	0	0	0	0	0	0	0	1	0	0	0	0	0	0	0	0	0	0	0	0	0	0	0	0	0	0	0	0	0	0	0	1	0	0	0
MA-00055-366	MA-00055-366	1	1	1		1	1	1	1	0	1	0	0	0	0	0	0	0	0	0	0	0	0	0	1	1	0	0	0	0	1	0	0	0	1	0	0	0	0	0	0	0	0	0	0	0	0	0	1
MA-00055-37	MA-00055-37	1	1	1		1	1	1	1	1	1	1	1	1	1	1	1	1	1	1	1	0	0	1	1	1	1	1	1	1	0	1	1	1	1	1	1	1	1	1	1	1	1	1	1	0	0	1	1
MA-00141-2;MA-00055-39	MA-00141-2;MA-00055-39	13;13	13;13	13;13	;	2	13	13	13	9	8	7	8	10	9	11	7	8	7	8	10	8	9	8	8	7	7	7	7	9	7	7	6	9	8	7	8	10	9	11	7	8	7	8	10	8	9	8	8
MA-00055-4	MA-00055-4	1	1	1		1	1	1	1	1	1	1	1	1	1	1	1	1	1	1	1	1	1	1	1	1	1	1	0	1	1	1	1	1	1	1	1	1	1	1	1	1	1	1	1	1	1	1	1
MA-00055-55	MA-00055-55	13	13	13		1	13	13	13	5	4	6	8	4	5	5	4	8	6	7	7	3	2	4	4	3	4	3	3	3	3	4	2	5	4	6	8	4	5	5	4	8	6	7	7	3	2	4	4
MA-00055-64	MA-00055-64	3	3	3		1	3	3	3	0	0	0	0	0	1	0	0	0	1	0	0	2	1	1	1	2	1	0	2	0	0	1	0	0	0	0	0	0	1	0	0	0	1	0	0	2	1	1	1
MA-00055-65	MA-00055-65	10	10	10		1	10	10	10	9	7	10	9	10	10	9	10	9	9	9	10	5	8	8	6	8	7	9	7	10	8	9	8	9	7	10	9	10	10	9	10	9	9	9	10	5	8	8	6
MA-00055-69	MA-00055-69	6	6	6		1	6	6	6	3	5	3	4	4	5	2	2	2	2	1	2	1	2	3	3	3	2	3	3	4	2	2	3	3	5	3	4	4	5	2	2	2	2	1	2	1	2	3	3
MA-00055-71	MA-00055-71	6	6	6		1	6	6	6	4	4	4	5	5	5	5	5	4	4	4	5	6	5	2	3	4	4	4	4	4	4	5	4	4	4	4	5	5	5	5	5	4	4	4	5	6	5	2	3
MA-00141-1;MA-00055-72	MA-00141-1;MA-00055-72	2;2	2;2	2;2	;	2	2	2	2	1	1	1	0	2	1	1	1	1	1	2	1	1	0	1	1	1	2	1	1	2	1	1	0	1	1	1	0	2	1	1	1	1	1	2	1	1	0	1	1
MA-00055-74	MA-00055-74	4	4	4		1	4	4	4	2	2	0	1	2	0	3	2	2	2	1	1	1	1	0	0	1	1	1	1	2	1	2	2	2	2	0	1	2	0	3	2	2	2	1	1	1	1	0	0
MA-00055-77	MA-00055-77	10	10	10		1	10	10	10	9	8	6	9	8	10	8	9	8	7	6	8	4	3	5	4	4	4	4	5	8	6	6	7	9	8	6	9	8	10	8	9	8	7	6	8	4	3	5	4
MA-00055-80	MA-00055-80	4	4	4		1	4	4	4	0	2	0	2	2	1	1	0	1	1	1	2	1	2	2	2	1	0	1	1	1	3	1	1	0	2	0	2	2	1	1	0	1	1	1	2	1	2	2	2
MA-00055-81	MA-00055-81	14	14	14		1	14	14	14	12	11	11	11	14	13	13	13	14	14	12	12	12	14	13	12	14	10	12	12	13	12	14	11	12	11	11	11	14	13	13	13	14	14	12	12	12	14	13	12
MA-00055-83	MA-00055-83	21	21	21		1	21	21	21	17	13	15	16	14	14	16	16	14	13	14	12	16	20	17	17	15	17	19	20	16	18	19	18	17	13	15	16	14	14	16	16	14	13	14	12	16	20	17	17
MA-00055-89	MA-00055-89	15	15	15		1	15	15	15	11	11	10	11	14	13	13	10	14	13	13	10	12	11	13	9	11	11	11	13	9	9	8	8	11	11	10	11	14	13	13	10	14	13	13	10	12	11	13	9
MA-00055-92	MA-00055-92	3	3	3		1	3	3	3	1	1	2	2	0	2	0	2	1	3	2	1	0	0	0	1	1	1	1	0	1	0	1	1	1	1	2	2	0	2	0	2	1	3	2	1	0	0	0	1
MA-00055-93	MA-00055-93	18	18	18		1	18	18	18	10	9	11	12	12	11	12	11	10	11	10	8	3	5	3	3	6	7	6	5	6	4	6	5	10	9	11	12	12	11	12	11	10	11	10	8	3	5	3	3
MA-00055-99	MA-00055-99	17	17	17		1	17	17	17	8	6	3	12	12	9	8	7	6	5	6	8	11	17	17	13	12	13	16	14	9	11	7	11	8	6	3	12	12	9	8	7	6	5	6	8	11	17	17	13
MA-00056-1	MA-00056-1	1	1	1		1	1	1	1	1	1	1	1	0	0	1	0	0	0	0	1	0	0	0	0	0	0	0	0	0	0	0	0	1	1	1	1	0	0	1	0	0	0	0	1	0	0	0	0
MA-00067-102	MA-00067-102	8	8	8		1	8	8	8	5	4	3	4	3	5	4	4	5	3	3	4	1	2	1	1	3	2	1	1	3	4	2	4	5	4	3	4	3	5	4	4	5	3	3	4	1	2	1	1
MA-00067-105	MA-00067-105	1	1	1		1	1	1	1	0	0	0	0	0	0	0	0	0	0	0	0	0	1	0	0	0	0	0	0	0	0	0	0	0	0	0	0	0	0	0	0	0	0	0	0	0	1	0	0
MA-00067-109;MA-00067-100	MA-00067-109	16;4	16;4	16;4		2	16	16	16	13	13	11	14	14	13	11	12	12	7	11	12	15	14	16	12	13	14	12	14	13	11	15	12	13	13	11	14	14	13	11	12	12	7	11	12	15	14	16	12
MA-00067-110	MA-00067-110	10	10	10		1	10	10	10	3	3	5	4	4	5	6	6	3	4	3	3	7	9	7	7	6	7	7	7	2	5	5	4	3	3	5	4	4	5	6	6	3	4	3	3	7	9	7	7
MA-00067-112	MA-00067-112	5	5	5		1	5	5	5	3	2	2	3	2	2	4	3	2	2	1	1	3	5	4	5	5	3	3	4	3	2	3	4	3	2	2	3	2	2	4	3	2	2	1	1	3	5	4	5
MA-00067-113	MA-00067-113	1	1	1		1	1	1	1	0	0	0	0	0	0	0	0	0	0	1	0	0	0	0	0	0	0	0	0	0	0	0	0	0	0	0	0	0	0	0	0	0	0	1	0	0	0	0	0
MA-00073-113;MA-00067-124	MA-00073-113;MA-00067-124	2;2	2;2	2;2	;	2	2	2	2	2	2	2	2	2	2	2	2	2	2	2	2	2	2	1	2	2	2	2	2	2	2	2	2	2	2	2	2	2	2	2	2	2	2	2	2	2	2	1	2
MA-00067-125;MA-00182-196;MA-00073-328;MA-00120-275	MA-00067-125;MA-00182-196;MA-00073-328;MA-00120-275	2;1;1;1	2;1;1;1	1;0;0;0	;;;	4	2	2	1	0	0	0	1	0	0	1	0	0	0	0	1	2	2	1	1	2	1	1	0	1	0	1	2	0	0	0	1	0	0	1	0	0	0	0	1	2	2	1	1
MA-00067-129	MA-00067-129	19	19	19		1	19	19	19	8	7	7	7	9	8	11	6	17	14	16	14	6	3	5	6	5	5	7	6	10	5	10	6	8	7	7	7	9	8	11	6	17	14	16	14	6	3	5	6
MA-00067-130	MA-00067-130	8	8	7		1	8	8	7	6	5	3	5	4	3	4	5	4	6	4	5	4	5	7	6	6	6	4	5	4	3	5	3	6	5	3	5	4	3	4	5	4	6	4	5	4	5	7	6
MA-00153-596;MA-00067-131	MA-00153-596;MA-00067-131	11;11	11;11	10;10	;	2	11	11	10	9	8	11	10	10	11	10	9	9	10	8	11	10	10	11	9	8	8	9	11	11	8	10	10	9	8	11	10	10	11	10	9	9	10	8	11	10	10	11	9
MA-00067-132	MA-00067-132	5	5	5		1	5	5	5	3	4	4	4	4	4	4	4	3	2	2	4	4	5	5	4	4	5	5	4	4	5	4	4	3	4	4	4	4	4	4	4	3	2	2	4	4	5	5	4
MA-00067-135	MA-00067-135	7	7	7		1	7	7	7	1	2	1	3	5	3	1	3	1	1	1	2	3	3	3	3	2	3	5	5	3	3	3	3	1	2	1	3	5	3	1	3	1	1	1	2	3	3	3	3
MA-00067-139	MA-00067-139	2	2	2		1	2	2	2	0	0	0	0	0	0	0	0	0	0	0	0	0	0	0	0	1	1	0	1	0	0	0	0	0	0	0	0	0	0	0	0	0	0	0	0	0	0	0	0
MA-00067-141	MA-00067-141	4	2	2		1	4	2	2	2	2	3	2	3	3	3	2	2	3	2	2	4	2	2	1	2	2	1	2	2	2	3	2	0	0	1	0	1	1	1	0	0	1	0	0	2	0	0	0
MA-00067-142	MA-00067-142	8	8	8		1	8	8	8	5	5	4	5	5	5	4	6	5	5	3	5	4	6	5	5	6	5	5	4	6	5	5	4	5	5	4	5	5	5	4	6	5	5	3	5	4	6	5	5
MA-00067-146	MA-00067-146	9	2	2		1	9	2	2	6	7	6	7	6	9	6	5	5	6	6	7	4	6	4	4	5	6	6	5	5	5	7	6	0	1	0	1	0	2	0	0	0	0	0	1	0	1	0	0
MA-00067-147	MA-00067-147	11	11	11		1	11	11	11	5	5	5	4	2	5	4	1	4	2	4	3	7	9	9	7	7	7	8	8	6	7	6	5	5	5	5	4	2	5	4	1	4	2	4	3	7	9	9	7
MA-00067-148	MA-00067-148	1	1	1		1	1	1	1	1	1	1	1	1	1	1	1	1	1	1	1	0	0	0	0	0	0	0	0	1	0	1	1	1	1	1	1	1	1	1	1	1	1	1	1	0	0	0	0
MA-00067-149	MA-00067-149	3	3	3		1	3	3	3	2	1	0	0	0	1	2	1	1	1	0	1	2	3	2	2	2	2	2	3	1	1	1	1	2	1	0	0	0	1	2	1	1	1	0	1	2	3	2	2
MA-00067-15	MA-00067-15	1	1	1		1	1	1	1	1	1	1	1	1	1	1	1	1	1	1	1	1	1	1	0	1	1	1	0	1	1	1	1	1	1	1	1	1	1	1	1	1	1	1	1	1	1	1	0
MA-00067-152	MA-00067-152	3	3	3		1	3	3	3	0	0	1	1	0	2	0	1	1	1	0	0	2	0	0	1	2	1	3	1	0	2	0	1	0	0	1	1	0	2	0	1	1	1	0	0	2	0	0	1
MA-00067-155	MA-00067-155	10	10	10		1	10	10	10	7	9	6	7	8	8	6	7	8	8	9	6	6	9	5	6	8	5	7	8	8	8	8	9	7	9	6	7	8	8	6	7	8	8	9	6	6	9	5	6
MA-00067-160	MA-00067-160	8	8	8		1	8	8	8	4	3	2	2	3	7	7	1	4	3	4	5	0	1	3	2	3	0	2	1	3	3	2	2	4	3	2	2	3	7	7	1	4	3	4	5	0	1	3	2
MA-00067-161	MA-00067-161	3	3	3		1	3	3	3	2	1	1	2	2	2	2	2	1	2	1	2	2	2	1	3	1	1	1	3	2	1	3	2	2	1	1	2	2	2	2	2	1	2	1	2	2	2	1	3
MA-00067-163	MA-00067-163	1	1	1		1	1	1	1	0	1	0	0	0	0	0	0	0	0	0	0	0	0	0	0	0	0	0	0	0	0	0	0	0	1	0	0	0	0	0	0	0	0	0	0	0	0	0	0
MA-00067-165	MA-00067-165	7	7	7		1	7	7	7	2	0	2	2	4	2	3	4	5	3	3	4	5	4	2	5	3	3	3	3	1	3	2	1	2	0	2	2	4	2	3	4	5	3	3	4	5	4	2	5
MA-00067-166	MA-00067-166	13	13	13		1	13	13	13	7	6	7	7	8	6	6	7	5	6	6	5	7	10	11	5	9	8	8	10	7	8	8	8	7	6	7	7	8	6	6	7	5	6	6	5	7	10	11	5
MA-00067-167	MA-00067-167	10	10	10		1	10	10	10	2	3	3	4	3	5	3	5	3	4	4	3	0	3	4	3	6	1	3	4	3	3	6	2	2	3	3	4	3	5	3	5	3	4	4	3	0	3	4	3
MA-00067-169	MA-00067-169	77	77	77		1	77	77	77	6	9	4	8	13	10	11	7	10	3	9	7	61	67	67	64	43	45	42	48	7	8	15	9	6	9	4	8	13	10	11	7	10	3	9	7	61	67	67	64
MA-00067-170	MA-00067-170	4	4	4		1	4	4	4	1	1	1	1	2	1	2	2	2	2	2	0	2	0	1	1	0	0	2	0	1	2	1	0	1	1	1	1	2	1	2	2	2	2	2	0	2	0	1	1
MA-00067-171	MA-00067-171	9	9	9		1	9	9	9	1	1	0	0	1	0	2	2	5	3	4	4	8	7	8	8	7	9	7	6	1	3	2	4	1	1	0	0	1	0	2	2	5	3	4	4	8	7	8	8
MA-00067-176	MA-00067-176	9	5	5		1	9	5	5	3	3	3	3	3	2	4	4	4	2	2	4	5	3	6	5	5	6	7	5	1	4	3	4	1	1	0	1	1	1	2	0	1	0	0	1	3	2	3	1
MA-00067-182	MA-00067-182	16	16	16		1	16	16	16	10	10	9	8	9	5	2	2	7	7	10	6	13	15	13	12	13	11	11	12	10	8	9	11	10	10	9	8	9	5	2	2	7	7	10	6	13	15	13	12
MA-00067-188	MA-00067-188	4	4	4		1	4	4	4	2	3	1	1	2	2	1	2	1	1	2	1	2	2	2	0	2	1	1	1	2	1	1	2	2	3	1	1	2	2	1	2	1	1	2	1	2	2	2	0
MA-00067-19	MA-00067-19	32	32	32		1	32	32	32	24	24	22	22	23	24	22	25	20	20	21	22	24	26	26	27	26	24	24	26	23	23	21	26	24	24	22	22	23	24	22	25	20	20	21	22	24	26	26	27
MA-00067-190	MA-00067-190	3	3	3		1	3	3	3	3	3	3	3	3	3	3	2	3	3	3	3	3	3	3	3	2	3	2	3	3	3	3	3	3	3	3	3	3	3	3	2	3	3	3	3	3	3	3	3
MA-00067-191	MA-00067-191	16	16	16		1	16	16	16	12	13	14	14	15	14	15	13	14	12	16	13	11	12	12	12	11	14	13	13	11	15	12	12	12	13	14	14	15	14	15	13	14	12	16	13	11	12	12	12
MA-00067-192;MA-00153-690	MA-00067-192;MA-00153-690	2;1	2;1	2;1	;	2	2	2	2	1	1	2	1	1	1	1	2	1	0	1	2	1	1	1	1	1	1	1	1	1	1	2	1	1	1	2	1	1	1	1	2	1	0	1	2	1	1	1	1
MA-00067-194	MA-00067-194	1	1	1		1	1	1	1	0	0	0	0	1	1	0	1	0	0	1	0	0	0	0	0	0	1	1	1	1	0	1	1	0	0	0	0	1	1	0	1	0	0	1	0	0	0	0	0
MA-00067-20	MA-00067-20	4	4	4		1	4	4	4	1	2	2	2	3	2	2	2	3	1	2	2	2	2	3	2	1	2	2	3	1	1	2	2	1	2	2	2	3	2	2	2	3	1	2	2	2	2	3	2
MA-00067-207	MA-00067-207	2	2	2		1	2	2	2	2	2	1	2	2	2	2	2	1	0	1	1	0	2	2	0	1	2	2	1	2	2	2	2	2	2	1	2	2	2	2	2	1	0	1	1	0	2	2	0
MA-00067-208	MA-00067-208	7	7	7		1	7	7	7	1	4	3	2	3	1	3	3	2	2	2	1	3	4	2	3	4	2	3	3	2	3	3	2	1	4	3	2	3	1	3	3	2	2	2	1	3	4	2	3
MA-00067-21	MA-00067-21	9	9	9		1	9	9	9	5	6	5	6	6	6	6	6	5	6	5	6	3	6	6	4	6	6	6	7	5	6	6	7	5	6	5	6	6	6	6	6	5	6	5	6	3	6	6	4
MA-00067-214	MA-00067-214	12	6	6		1	12	6	6	10	10	8	10	10	9	10	11	7	8	8	8	8	11	10	7	9	9	10	10	9	8	9	8	4	4	2	4	4	3	5	5	1	2	2	2	2	5	4	1
MA-00067-219	MA-00067-219	9	9	8		1	9	9	8	5	2	2	3	2	2	1	3	2	0	1	2	5	6	5	5	5	5	5	6	2	2	2	2	5	2	2	3	2	2	1	3	2	0	1	2	5	6	5	5
MA-00067-225	MA-00067-225	13	13	13		1	13	13	13	5	3	4	5	6	6	4	3	4	4	1	2	2	9	8	4	3	7	8	4	5	5	4	5	5	3	4	5	6	6	4	3	4	4	1	2	2	9	8	4
MA-00067-230	MA-00067-230	1	1	1		1	1	1	1	0	0	0	0	0	0	0	0	0	0	0	0	0	1	0	0	0	1	0	0	0	0	0	0	0	0	0	0	0	0	0	0	0	0	0	0	0	1	0	0
MA-00067-233	MA-00067-233	8	8	8		1	8	8	8	4	4	3	5	4	6	4	5	5	5	7	5	3	4	4	1	2	2	3	4	4	1	3	3	4	4	3	5	4	6	4	5	5	5	7	5	3	4	4	1
MA-00067-243	MA-00067-243	7	7	1		1	7	7	1	7	6	7	7	7	7	6	6	7	6	7	6	6	6	6	6	6	6	6	6	6	7	6	6	7	6	7	7	7	7	6	6	7	6	7	6	6	6	6	6
MA-00067-244	MA-00067-244	3	3	3		1	3	3	3	2	1	1	1	1	1	1	2	2	1	1	1	2	3	3	1	1	1	2	1	1	2	1	2	2	1	1	1	1	1	1	2	2	1	1	1	2	3	3	1
MA-00067-245	MA-00067-245	2	2	2		1	2	2	2	1	0	2	0	1	0	1	0	0	0	1	0	2	0	1	0	1	2	1	1	1	1	2	2	1	0	2	0	1	0	1	0	0	0	1	0	2	0	1	0
MA-00067-246	MA-00067-246	1	1	1		1	1	1	1	0	0	0	0	0	0	1	0	0	1	0	0	0	1	0	0	0	0	0	1	0	0	1	0	0	0	0	0	0	0	1	0	0	1	0	0	0	1	0	0
MA-00067-259	MA-00067-259	6	6	6		1	6	6	6	2	3	3	1	0	1	1	1	0	1	2	0	1	2	3	1	4	3	3	2	4	3	4	3	2	3	3	1	0	1	1	1	0	1	2	0	1	2	3	1
MA-00067-26	MA-00067-26	45	45	44		1	45	45	44	40	36	42	40	41	41	38	38	39	36	38	37	36	36	39	35	37	39	37	35	38	41	40	37	40	36	42	40	41	41	38	38	39	36	38	37	36	36	39	35
MA-00067-278	MA-00067-278	1	1	1		1	1	1	1	1	1	1	0	1	1	1	1	1	1	1	1	1	1	1	1	1	1	1	1	0	1	1	1	1	1	1	0	1	1	1	1	1	1	1	1	1	1	1	1
MA-00067-279	MA-00067-279	2	2	2		1	2	2	2	0	1	0	1	2	1	1	2	1	1	2	0	0	1	1	2	1	1	1	2	0	2	1	1	0	1	0	1	2	1	1	2	1	1	2	0	0	1	1	2
MA-00067-280	MA-00067-280	1	1	1		1	1	1	1	0	0	0	0	0	0	0	0	0	0	0	0	0	0	0	0	0	0	1	0	0	0	1	0	0	0	0	0	0	0	0	0	0	0	0	0	0	0	0	0
MA-00067-281	MA-00067-281	4	4	4		1	4	4	4	2	3	2	3	2	3	3	3	3	2	3	3	2	2	2	1	2	4	3	3	2	3	2	3	2	3	2	3	2	3	3	3	3	2	3	3	2	2	2	1
MA-00067-282	MA-00067-282	11	11	11		1	11	11	11	9	7	10	10	10	9	10	10	9	9	9	8	7	6	6	7	8	7	5	9	9	7	7	7	9	7	10	10	10	9	10	10	9	9	9	8	7	6	6	7
MA-00067-285	MA-00067-285	5	5	5		1	5	5	5	3	2	1	4	2	2	1	3	1	1	3	1	2	1	3	0	3	4	3	4	3	2	3	3	3	2	1	4	2	2	1	3	1	1	3	1	2	1	3	0
MA-00067-288	MA-00067-288	2	2	2		1	2	2	2	0	0	0	0	1	0	0	1	0	0	0	0	0	0	0	1	0	0	0	0	0	0	0	0	0	0	0	0	1	0	0	1	0	0	0	0	0	0	0	1
MA-00067-294	MA-00067-294	24	24	17		1	24	24	17	11	11	11	10	12	13	9	12	9	8	9	6	18	19	19	18	18	17	20	18	14	12	14	14	11	11	11	10	12	13	9	12	9	8	9	6	18	19	19	18
MA-00067-295	MA-00067-295	5	5	3		1	5	5	3	3	3	2	3	4	4	3	3	3	3	3	4	4	4	3	4	4	4	3	4	4	3	3	4	3	3	2	3	4	4	3	3	3	3	3	4	4	4	3	4
MA-00067-296	MA-00067-296	15	3	3		1	15	3	3	12	12	12	13	14	13	13	13	12	12	12	11	12	15	14	11	12	12	14	15	12	12	14	14	3	3	3	3	3	3	3	3	2	2	2	2	2	3	3	2
MA-00067-303	MA-00067-303	14	14	14		1	14	14	14	12	13	12	12	11	12	12	12	11	12	12	11	12	13	14	11	13	12	14	13	13	12	13	12	12	13	12	12	11	12	12	12	11	12	12	11	12	13	14	11
MA-00067-304	MA-00067-304	2	2	2		1	2	2	2	0	0	0	0	0	0	0	0	0	0	0	0	2	2	2	2	1	2	2	2	0	0	0	0	0	0	0	0	0	0	0	0	0	0	0	0	2	2	2	2
MA-00067-308	MA-00067-308	1	1	1		1	1	1	1	1	1	1	1	1	1	0	1	0	0	0	0	0	1	1	1	1	0	1	1	1	1	1	1	1	1	1	1	1	1	0	1	0	0	0	0	0	1	1	1
MA-00067-312	MA-00067-312	9	9	9		1	9	9	9	5	6	4	6	6	6	6	5	6	3	3	2	4	5	7	5	4	4	4	5	4	4	5	6	5	6	4	6	6	6	6	5	6	3	3	2	4	5	7	5
MA-00067-320	MA-00067-320	7	7	7		1	7	7	7	7	7	6	7	7	7	7	7	7	5	5	6	6	7	7	6	7	7	7	7	7	6	6	7	7	7	6	7	7	7	7	7	7	5	5	6	6	7	7	6
MA-00067-321	MA-00067-321	5	5	5		1	5	5	5	3	3	2	3	3	2	3	4	2	2	2	2	4	4	5	5	3	3	3	4	2	3	4	3	3	3	2	3	3	2	3	4	2	2	2	2	4	4	5	5
MA-00067-322	MA-00067-322	3	3	3		1	3	3	3	2	3	2	1	1	2	2	0	1	1	2	1	0	0	0	0	1	1	0	1	1	1	0	0	2	3	2	1	1	2	2	0	1	1	2	1	0	0	0	0
MA-00067-323	MA-00067-323	2	2	2		1	2	2	2	0	0	0	1	1	0	0	0	1	0	0	0	1	1	1	1	1	1	0	0	1	0	0	1	0	0	0	1	1	0	0	0	1	0	0	0	1	1	1	1
MA-00067-324	MA-00067-324	3	3	3		1	3	3	3	2	1	2	1	2	0	1	2	1	2	2	3	0	1	0	0	1	0	1	1	1	2	1	1	2	1	2	1	2	0	1	2	1	2	2	3	0	1	0	0
MA-00067-326;MA-00320-28;MA-00268-12	MA-00067-326;MA-00320-28;MA-00268-12	7;7;6	7;7;6	7;7;6	;;	3	7	7	7	5	5	7	7	6	5	5	4	5	5	6	5	4	6	6	5	7	5	5	5	5	6	6	6	5	5	7	7	6	5	5	4	5	5	6	5	4	6	6	5
MA-00067-329	MA-00067-329	2	2	2		1	2	2	2	1	0	0	0	2	0	0	1	0	0	1	1	0	1	0	0	0	0	1	0	1	1	0	1	1	0	0	0	2	0	0	1	0	0	1	1	0	1	0	0
MA-00067-336	MA-00067-336	11	11	11		1	11	11	11	5	5	5	6	4	5	6	5	5	4	7	7	5	8	8	4	6	9	8	5	6	5	6	6	5	5	5	6	4	5	6	5	5	4	7	7	5	8	8	4
MA-00067-34	MA-00067-34	7	7	7		1	7	7	7	5	4	5	6	4	4	5	5	5	6	5	5	4	4	3	4	4	5	4	5	6	5	5	7	5	4	5	6	4	4	5	5	5	6	5	5	4	4	3	4
MA-00067-340	MA-00067-340	3	3	3		1	3	3	3	0	1	1	1	1	2	2	1	1	2	2	1	0	0	0	1	1	1	0	2	1	1	0	0	0	1	1	1	1	2	2	1	1	2	2	1	0	0	0	1
MA-00067-345	MA-00067-345	4	4	4		1	4	4	4	0	1	2	0	0	0	0	0	1	1	1	0	0	1	3	2	3	1	0	1	0	2	1	0	0	1	2	0	0	0	0	0	1	1	1	0	0	1	3	2
MA-00067-346	MA-00067-346	10	10	10		1	10	10	10	7	6	8	8	7	9	8	7	8	7	7	8	7	6	5	4	8	6	4	5	9	8	9	7	7	6	8	8	7	9	8	7	8	7	7	8	7	6	5	4
MA-00067-347	MA-00067-347	2	2	2		1	2	2	2	1	1	2	1	1	0	1	1	1	2	1	1	0	1	1	1	1	1	1	1	1	1	1	2	1	1	2	1	1	0	1	1	1	2	1	1	0	1	1	1
MA-00067-349	MA-00067-349	2	2	2		1	2	2	2	2	1	0	2	2	2	2	1	1	0	1	2	1	0	0	1	0	0	1	1	0	0	0	0	2	1	0	2	2	2	2	1	1	0	1	2	1	0	0	1
MA-00067-352	MA-00067-352	1	1	1		1	1	1	1	0	0	0	1	0	1	0	0	0	0	0	0	0	1	0	0	0	0	0	0	0	0	0	0	0	0	0	1	0	1	0	0	0	0	0	0	0	1	0	0
MA-00067-353	MA-00067-353	3	3	3		1	3	3	3	2	2	0	2	2	1	2	2	0	1	1	0	0	3	2	0	0	1	2	2	2	2	1	1	2	2	0	2	2	1	2	2	0	1	1	0	0	3	2	0
MA-00067-354	MA-00067-354	12	12	12		1	12	12	12	6	8	7	9	7	7	4	7	5	6	6	4	9	6	6	8	8	7	7	7	5	9	9	8	6	8	7	9	7	7	4	7	5	6	6	4	9	6	6	8
MA-00067-357	MA-00067-357	11	11	11		1	11	11	11	8	7	8	7	8	7	9	9	9	10	11	8	7	9	7	6	8	6	7	11	7	7	6	8	8	7	8	7	8	7	9	9	9	10	11	8	7	9	7	6
MA-00067-358	MA-00067-358	6	6	6		1	6	6	6	5	4	5	4	4	4	5	5	4	5	4	4	3	4	3	5	4	4	4	3	3	3	4	4	5	4	5	4	4	4	5	5	4	5	4	4	3	4	3	5
MA-00067-364	MA-00067-364	1	1	1		1	1	1	1	0	0	0	0	0	0	0	0	0	0	0	0	1	1	1	1	1	0	0	0	0	0	0	0	0	0	0	0	0	0	0	0	0	0	0	0	1	1	1	1
MA-00067-365	MA-00067-365	4	4	4		1	4	4	4	3	3	2	3	3	2	1	2	2	3	2	2	1	0	0	1	0	0	1	1	2	0	3	2	3	3	2	3	3	2	1	2	2	3	2	2	1	0	0	1
MA-00067-367	MA-00067-367	17	17	16		1	17	17	16	12	15	13	13	11	15	14	14	12	12	14	15	5	8	10	7	9	10	8	10	12	13	12	13	12	15	13	13	11	15	14	14	12	12	14	15	5	8	10	7
MA-00067-368	MA-00067-368	4	4	4		1	4	4	4	4	4	3	4	4	3	3	4	3	3	3	4	2	1	1	0	2	1	2	2	3	2	4	3	4	4	3	4	4	3	3	4	3	3	3	4	2	1	1	0
MA-00067-369	MA-00067-369	1	1	1		1	1	1	1	1	0	0	1	0	0	0	1	0	1	1	0	1	1	1	1	1	1	0	1	1	0	1	1	1	0	0	1	0	0	0	1	0	1	1	0	1	1	1	1
MA-00067-375	MA-00067-375	19	19	19		1	19	19	19	13	15	13	12	15	17	16	11	10	11	11	8	12	14	14	9	13	12	16	15	14	13	17	15	13	15	13	12	15	17	16	11	10	11	11	8	12	14	14	9
MA-00067-379	MA-00067-379	4	4	4		1	4	4	4	0	0	1	0	0	1	0	0	0	0	0	1	1	0	2	1	1	0	2	2	1	1	0	1	0	0	1	0	0	1	0	0	0	0	0	1	1	0	2	1
MA-00067-38	MA-00067-38	1	1	1		1	1	1	1	1	1	1	1	1	1	1	1	0	0	0	0	0	1	1	0	1	1	1	1	1	1	1	1	1	1	1	1	1	1	1	1	0	0	0	0	0	1	1	0
MA-00067-380	MA-00067-380	9	9	3		1	9	9	3	7	6	8	7	7	8	7	7	7	6	7	6	6	7	7	8	6	4	7	7	7	6	7	8	7	6	8	7	7	8	7	7	7	6	7	6	6	7	7	8
MA-00067-381	MA-00067-381	14	7	3		1	14	7	3	10	9	8	9	10	11	10	9	7	7	8	9	8	9	10	8	9	9	10	8	11	10	9	9	5	4	3	4	4	5	3	4	2	1	3	2	3	3	4	3
MA-00067-383	MA-00067-383	14	14	14		1	14	14	14	8	9	8	9	7	10	11	8	7	7	8	9	8	9	9	9	10	8	10	9	10	11	10	10	8	9	8	9	7	10	11	8	7	7	8	9	8	9	9	9
MA-00067-40	MA-00067-40	1	1	1		1	1	1	1	0	0	0	0	0	0	0	0	0	0	0	0	0	1	0	0	0	0	0	0	0	0	0	0	0	0	0	0	0	0	0	0	0	0	0	0	0	1	0	0
MA-00067-41	MA-00067-41	8	8	8		1	8	8	8	4	3	4	3	4	3	4	5	1	3	2	1	5	6	6	4	4	4	6	6	5	5	3	6	4	3	4	3	4	3	4	5	1	3	2	1	5	6	6	4
MA-00067-43	MA-00067-43	2	2	2		1	2	2	2	0	0	0	0	0	0	0	1	1	0	0	0	1	0	0	0	1	0	0	1	0	0	1	0	0	0	0	0	0	0	0	1	1	0	0	0	1	0	0	0
MA-00067-49	MA-00067-49	8	8	8		1	8	8	8	6	5	6	7	6	8	5	7	5	4	5	4	4	6	6	5	4	5	6	6	7	4	5	4	6	5	6	7	6	8	5	7	5	4	5	4	4	6	6	5
MA-00067-50	MA-00067-50	9	9	9		1	9	9	9	8	8	9	9	9	9	8	9	9	8	8	9	6	5	4	6	5	6	5	6	8	7	8	9	8	8	9	9	9	9	8	9	9	8	8	9	6	5	4	6
MA-00067-53	MA-00067-53	1	1	1		1	1	1	1	0	0	0	0	0	0	0	0	0	0	0	0	0	0	0	1	0	0	0	0	0	0	0	0	0	0	0	0	0	0	0	0	0	0	0	0	0	0	0	1
MA-00067-55	MA-00067-55	10	10	10		1	10	10	10	8	6	7	6	6	5	5	5	3	3	6	6	9	8	10	7	9	5	9	9	7	7	6	8	8	6	7	6	6	5	5	5	3	3	6	6	9	8	10	7
MA-00067-57	MA-00067-57	8	8	8		1	8	8	8	3	6	5	4	6	6	7	4	6	7	7	4	5	6	6	5	3	7	7	6	5	3	5	6	3	6	5	4	6	6	7	4	6	7	7	4	5	6	6	5
MA-00067-58	MA-00067-58	1	1	1		1	1	1	1	0	0	0	0	0	0	0	0	0	0	0	0	0	1	1	0	0	0	1	0	1	0	0	0	0	0	0	0	0	0	0	0	0	0	0	0	0	1	1	0
MA-00067-59	MA-00067-59	14	14	3		1	14	14	3	6	7	6	5	6	7	6	9	7	5	6	5	10	8	8	4	10	8	8	10	8	7	8	10	6	7	6	5	6	7	6	9	7	5	6	5	10	8	8	4
MA-00067-6	MA-00067-6	4	4	4		1	4	4	4	2	3	1	2	3	2	1	1	2	2	3	2	0	0	0	0	0	0	0	0	0	2	1	1	2	3	1	2	3	2	1	1	2	2	3	2	0	0	0	0
MA-00067-61;MA-00153-691	MA-00067-61	7;2	7;2	7;2		2	7	7	7	0	2	0	1	3	3	2	1	1	1	3	3	1	0	3	2	1	1	1	1	2	2	0	2	0	2	0	1	3	3	2	1	1	1	3	3	1	0	3	2
MA-00067-62	MA-00067-62	7	7	7		1	7	7	7	3	2	3	4	3	3	4	4	2	2	3	4	0	3	2	0	3	3	3	3	4	5	3	2	3	2	3	4	3	3	4	4	2	2	3	4	0	3	2	0
MA-00067-63	MA-00067-63	17	11	11		1	17	11	11	14	14	15	13	13	14	14	14	11	12	12	14	11	10	12	8	9	8	9	11	12	13	14	14	9	9	10	7	8	9	9	9	6	7	6	8	6	5	6	3
MA-00067-64	MA-00067-64	46	46	36		1	46	46	36	39	37	40	42	40	38	38	37	35	35	38	35	34	38	39	35	36	38	36	40	37	36	38	38	39	37	40	42	40	38	38	37	35	35	38	35	34	38	39	35
MA-00067-65	MA-00067-65	17	17	17		1	17	17	17	15	14	13	12	15	13	13	13	13	14	9	11	14	14	13	13	14	14	13	14	11	12	15	14	15	14	13	12	15	13	13	13	13	14	9	11	14	14	13	13
MA-00067-66	MA-00067-66	14	14	14		1	14	14	14	9	8	7	11	11	7	10	9	8	8	9	9	8	6	10	5	7	11	7	10	6	7	10	10	9	8	7	11	11	7	10	9	8	8	9	9	8	6	10	5
MA-00067-87	MA-00067-87	2	2	2		1	2	2	2	1	1	1	1	2	0	0	0	0	0	1	0	1	1	1	1	0	1	0	1	2	1	1	1	1	1	1	1	2	0	0	0	0	0	1	0	1	1	1	1
MA-00070-2	MA-00070-2	2	2	2		1	2	2	2	2	1	1	1	1	1	1	1	2	0	2	2	0	1	0	1	1	0	2	1	2	1	1	1	2	1	1	1	1	1	1	1	2	0	2	2	0	1	0	1
MA-00072-102	MA-00072-102	2	2	2		1	2	2	2	2	2	2	1	1	2	2	1	2	2	2	2	1	1	2	2	2	1	2	2	2	2	2	2	2	2	2	1	1	2	2	1	2	2	2	2	1	1	2	2
MA-00072-109;MA-00153-476	MA-00072-109;MA-00153-476	4;2	4;2	4;2	;	2	4	4	4	1	0	0	0	0	0	0	0	0	2	0	0	2	3	3	2	2	0	2	1	2	2	1	0	1	0	0	0	0	0	0	0	0	2	0	0	2	3	3	2
MA-00072-113	MA-00072-113	8	7	7		1	8	7	7	1	2	3	2	3	2	4	4	3	3	4	3	3	2	2	2	4	6	3	2	3	5	5	3	0	1	2	1	2	1	3	3	2	2	3	2	2	1	1	1
MA-00072-125	MA-00072-125	5	5	5		1	5	5	5	1	1	0	1	1	1	0	1	0	1	0	2	3	2	3	3	3	3	3	3	1	1	1	1	1	1	0	1	1	1	0	1	0	1	0	2	3	2	3	3
MA-00072-127	MA-00072-127	3	3	3		1	3	3	3	0	0	0	0	1	1	1	0	0	0	1	0	1	2	2	1	0	0	1	1	0	1	0	0	0	0	0	0	1	1	1	0	0	0	1	0	1	2	2	1
MA-00072-130	MA-00072-130	1	1	1		1	1	1	1	0	0	0	0	0	0	0	0	0	0	0	0	1	1	1	1	1	1	1	1	0	1	0	1	0	0	0	0	0	0	0	0	0	0	0	0	1	1	1	1
MA-00072-132	MA-00072-132	12	12	12		1	12	12	12	10	12	11	12	11	11	12	11	11	10	12	12	10	12	11	9	9	11	11	10	11	10	12	10	10	12	11	12	11	11	12	11	11	10	12	12	10	12	11	9
MA-00072-137	MA-00072-137	31	31	31		1	31	31	31	25	23	24	25	22	27	28	24	21	20	23	22	19	26	26	22	23	23	24	25	23	22	26	26	25	23	24	25	22	27	28	24	21	20	23	22	19	26	26	22
MA-00072-138	MA-00072-138	5	5	5		1	5	5	5	4	4	4	4	4	5	3	4	4	4	4	4	4	4	5	4	4	5	4	4	4	3	4	4	4	4	4	4	4	5	3	4	4	4	4	4	4	4	5	4
MA-00072-143	MA-00072-143	1	1	1		1	1	1	1	1	1	0	0	1	0	0	0	0	1	0	0	0	0	0	0	0	0	0	0	0	0	0	0	1	1	0	0	1	0	0	0	0	1	0	0	0	0	0	0
MA-00072-146	MA-00072-146	3	3	3		1	3	3	3	1	2	1	1	2	2	2	3	1	2	1	1	2	2	2	1	1	1	2	2	1	1	2	1	1	2	1	1	2	2	2	3	1	2	1	1	2	2	2	1
MA-00072-149	MA-00072-149	3	3	3		1	3	3	3	2	1	1	2	1	2	2	2	2	2	1	1	1	2	1	1	2	2	0	2	2	3	2	2	2	1	1	2	1	2	2	2	2	2	1	1	1	2	1	1
MA-00072-152	MA-00072-152	3	3	3		1	3	3	3	1	1	1	1	2	1	1	2	1	1	1	1	1	3	2	2	2	1	3	2	1	1	2	2	1	1	1	1	2	1	1	2	1	1	1	1	1	3	2	2
MA-00072-153	MA-00072-153	5	5	4		1	5	5	4	1	0	0	1	1	2	1	0	1	0	1	0	2	1	2	3	1	2	1	0	1	2	2	1	1	0	0	1	1	2	1	0	1	0	1	0	2	1	2	3
MA-00072-156;MA-00073-93	MA-00072-156;MA-00073-93	2;1	2;1	2;1	;	2	2	2	2	1	0	1	1	1	1	1	1	1	1	0	1	0	1	1	1	1	1	1	1	1	1	2	1	1	0	1	1	1	1	1	1	1	1	0	1	0	1	1	1
MA-00072-158	MA-00072-158	8	8	8		1	8	8	8	5	5	3	6	5	4	3	3	3	3	4	3	3	5	4	4	3	4	4	6	3	3	4	5	5	5	3	6	5	4	3	3	3	3	4	3	3	5	4	4
MA-00072-16	MA-00072-16	2	2	2		1	2	2	2	0	0	0	0	1	1	1	1	1	0	1	0	2	1	1	1	1	1	1	0	1	1	1	1	0	0	0	0	1	1	1	1	1	0	1	0	2	1	1	1
MA-00072-168	MA-00072-168	2	2	2		1	2	2	2	1	2	2	2	2	1	2	2	1	2	2	2	2	2	2	2	2	2	2	2	1	2	2	1	1	2	2	2	2	1	2	2	1	2	2	2	2	2	2	2
MA-00072-170	MA-00072-170	1	1	1		1	1	1	1	0	0	0	0	0	1	0	0	0	0	0	0	0	0	0	0	0	0	0	0	0	0	0	0	0	0	0	0	0	1	0	0	0	0	0	0	0	0	0	0
MA-00072-179	MA-00072-179	2	2	2		1	2	2	2	0	0	0	0	0	0	0	0	0	1	0	2	0	0	1	0	0	0	1	1	0	0	0	0	0	0	0	0	0	0	0	0	0	1	0	2	0	0	1	0
MA-00072-18	MA-00072-18	22	22	22		1	22	22	22	14	17	14	15	13	16	14	16	14	12	14	14	17	16	17	14	18	16	18	20	14	18	18	17	14	17	14	15	13	16	14	16	14	12	14	14	17	16	17	14
MA-00072-180	MA-00072-180	2	1	1		1	2	1	1	0	0	0	0	0	0	0	0	0	1	1	0	0	0	0	0	0	0	0	1	0	0	0	0	0	0	0	0	0	0	0	0	0	0	0	0	0	0	0	0
MA-00072-183	MA-00072-183	10	10	9		1	10	10	9	2	2	2	1	2	2	2	0	6	7	8	7	1	0	1	0	0	0	1	0	0	0	1	1	2	2	2	1	2	2	2	0	6	7	8	7	1	0	1	0
MA-00072-184	MA-00072-184	1	1	1		1	1	1	1	1	0	1	1	1	1	0	1	1	1	1	0	0	0	0	0	1	0	1	1	1	1	0	0	1	0	1	1	1	1	0	1	1	1	1	0	0	0	0	0
MA-00072-185	MA-00072-185	26	26	26		1	26	26	26	16	18	17	20	22	21	17	19	16	16	17	19	22	22	23	17	22	24	23	25	17	21	21	21	16	18	17	20	22	21	17	19	16	16	17	19	22	22	23	17
MA-00072-189	MA-00072-189	23	23	23		1	23	23	23	16	15	17	14	17	16	13	17	14	14	13	13	21	20	19	20	16	17	19	18	16	17	17	16	16	15	17	14	17	16	13	17	14	14	13	13	21	20	19	20
MA-00072-191;MA-00073-66	MA-00072-191	15;3	14;2	14;2		2	15	14	14	3	2	1	3	3	3	3	4	13	11	13	13	2	1	0	1	3	3	4	1	2	2	4	2	2	1	0	2	2	2	2	3	12	10	12	12	1	1	0	1
MA-00072-192	MA-00072-192	5	5	5		1	5	5	5	3	2	3	3	2	1	1	2	3	2	2	2	2	4	2	2	4	3	2	3	2	3	1	3	3	2	3	3	2	1	1	2	3	2	2	2	2	4	2	2
MA-00072-196	MA-00072-196	21	21	21		1	21	21	21	15	15	15	15	16	15	15	14	12	17	12	14	18	18	18	17	16	20	17	18	16	17	17	18	15	15	15	15	16	15	15	14	12	17	12	14	18	18	18	17
MA-00072-197	MA-00072-197	2	2	2		1	2	2	2	0	0	0	0	0	0	1	0	0	2	0	0	1	0	1	0	1	1	1	1	1	1	0	0	0	0	0	0	0	0	1	0	0	2	0	0	1	0	1	0
MA-00072-205	MA-00072-205	26	26	26		1	26	26	26	21	24	19	20	25	20	25	25	19	17	18	23	14	20	17	16	17	17	20	18	17	18	23	20	21	24	19	20	25	20	25	25	19	17	18	23	14	20	17	16
MA-00072-208	MA-00072-208	2	2	2		1	2	2	2	1	1	1	0	0	0	0	0	0	0	1	0	2	2	1	1	1	2	0	0	0	2	0	0	1	1	1	0	0	0	0	0	0	0	1	0	2	2	1	1
MA-00072-21	MA-00072-21	30	26	26		1	30	26	26	10	10	10	12	11	11	9	13	8	8	12	6	26	21	21	19	21	18	19	19	14	15	13	14	8	8	7	9	8	8	7	11	5	5	8	4	24	19	19	17
MA-00072-215	MA-00072-215	46	46	44		1	46	46	44	39	38	38	39	42	40	39	42	41	39	40	38	37	36	36	31	38	39	38	35	35	36	40	40	39	38	38	39	42	40	39	42	41	39	40	38	37	36	36	31
MA-00072-222	MA-00072-222	2	2	2		1	2	2	2	0	1	1	0	0	0	0	0	1	1	0	0	1	1	1	1	0	0	0	0	0	0	1	0	0	1	1	0	0	0	0	0	1	1	0	0	1	1	1	1
MA-00072-233	MA-00072-233	13	4	4		1	13	4	4	12	12	11	11	12	11	12	13	11	10	10	10	11	12	13	12	13	12	11	12	12	11	10	10	4	3	3	4	4	4	4	4	3	3	2	3	3	4	4	4
MA-00072-234	MA-00072-234	10	10	10		1	10	10	10	5	3	2	1	1	2	3	2	0	1	0	1	5	3	5	4	6	6	6	6	3	3	4	2	5	3	2	1	1	2	3	2	0	1	0	1	5	3	5	4
MA-00072-238	MA-00072-238	1	1	1		1	1	1	1	1	1	0	0	1	1	1	1	1	1	1	1	0	0	0	0	0	0	0	0	1	1	0	0	1	1	0	0	1	1	1	1	1	1	1	1	0	0	0	0
MA-00072-242	MA-00072-242	1	1	1		1	1	1	1	1	1	1	1	1	1	1	1	1	1	1	1	1	1	1	0	1	1	1	1	1	1	1	1	1	1	1	1	1	1	1	1	1	1	1	1	1	1	1	0
MA-00072-243	MA-00072-243	12	12	12		1	12	12	12	7	10	8	10	7	7	8	8	10	9	8	7	2	2	2	4	3	1	2	3	9	8	8	8	7	10	8	10	7	7	8	8	10	9	8	7	2	2	2	4
MA-00072-245	MA-00072-245	19	19	19		1	19	19	19	13	15	14	17	16	16	15	15	13	15	14	17	15	14	15	12	14	16	17	16	14	14	17	16	13	15	14	17	16	16	15	15	13	15	14	17	15	14	15	12
MA-00072-246	MA-00072-246	14	14	14		1	14	14	14	12	14	12	12	13	11	12	11	12	12	12	11	10	10	13	11	13	13	12	14	13	11	11	12	12	14	12	12	13	11	12	11	12	12	12	11	10	10	13	11
MA-00072-249	MA-00072-249	16	16	16		1	16	16	16	9	10	10	12	9	10	8	8	8	9	8	9	12	13	14	15	13	14	13	15	13	10	11	10	9	10	10	12	9	10	8	8	8	9	8	9	12	13	14	15
MA-00072-25	MA-00072-25	17	17	17		1	17	17	17	12	12	16	12	12	13	11	14	14	13	13	13	12	12	12	10	13	12	10	12	12	12	11	12	12	12	16	12	12	13	11	14	14	13	13	13	12	12	12	10
MA-00072-251	MA-00072-251	2	2	2		1	2	2	2	0	0	0	0	0	0	0	0	0	0	0	0	0	2	1	0	0	0	0	1	0	0	0	0	0	0	0	0	0	0	0	0	0	0	0	0	0	2	1	0
MA-00072-257	MA-00072-257	21	21	20		1	21	21	20	13	15	11	13	17	18	15	14	13	12	13	15	6	10	7	8	9	9	11	8	7	10	10	10	13	15	11	13	17	18	15	14	13	12	13	15	6	10	7	8
MA-00072-26	MA-00072-26	41	41	41		1	41	41	41	3	5	6	3	2	3	0	1	5	5	5	5	32	34	30	32	26	27	29	32	11	10	12	8	3	5	6	3	2	3	0	1	5	5	5	5	32	34	30	32
MA-00072-264;MA-00120-310	MA-00072-264	9;1	9;1	9;1		2	9	9	9	7	7	7	7	8	7	6	7	6	7	7	7	6	7	7	7	6	7	7	6	7	8	7	8	7	7	7	7	8	7	6	7	6	7	7	7	6	7	7	7
MA-00072-265;MA-00139-390	MA-00072-265;MA-00139-390	9;8	9;8	9;8	;	2	9	9	9	5	6	5	6	4	8	5	5	6	5	6	6	7	8	8	7	6	5	5	6	5	5	5	5	5	6	5	6	4	8	5	5	6	5	6	6	7	8	8	7
MA-00072-268	MA-00072-268	1	1	1		1	1	1	1	0	1	0	1	1	0	0	1	0	0	0	0	0	0	0	0	0	0	0	0	0	0	1	1	0	1	0	1	1	0	0	1	0	0	0	0	0	0	0	0
MA-00072-278	MA-00072-278	2	2	2		1	2	2	2	2	1	2	2	2	1	2	2	2	2	2	2	2	2	1	2	2	2	2	2	2	2	2	2	2	1	2	2	2	1	2	2	2	2	2	2	2	2	1	2
MA-00072-279	MA-00072-279	2	2	2		1	2	2	2	1	0	0	0	0	0	1	1	2	1	0	1	1	0	0	0	0	0	0	0	0	0	1	1	1	0	0	0	0	0	1	1	2	1	0	1	1	0	0	0
MA-00072-281	MA-00072-281	5	5	5		1	5	5	5	0	1	1	1	2	1	0	0	0	2	2	0	2	2	0	0	0	1	3	2	3	0	0	0	0	1	1	1	2	1	0	0	0	2	2	0	2	2	0	0
MA-00072-282	MA-00072-282	29	29	29		1	29	29	29	22	19	25	25	23	22	21	22	21	21	22	21	22	25	24	24	25	24	24	27	25	21	24	22	22	19	25	25	23	22	21	22	21	21	22	21	22	25	24	24
MA-00072-283	MA-00072-283	6	6	6		1	6	6	6	4	5	4	4	4	5	4	5	5	5	5	5	6	5	4	5	5	5	5	5	4	4	5	5	4	5	4	4	4	5	4	5	5	5	5	5	6	5	4	5
MA-00072-284	MA-00072-284	10	10	10		1	10	10	10	6	5	4	6	6	6	5	6	4	7	6	6	8	6	3	7	4	7	4	6	6	5	4	4	6	5	4	6	6	6	5	6	4	7	6	6	8	6	3	7
MA-00072-298	MA-00072-298	4	4	4		1	4	4	4	0	0	0	1	0	1	1	1	0	1	0	1	0	1	1	0	1	0	1	1	0	1	2	0	0	0	0	1	0	1	1	1	0	1	0	1	0	1	1	0
MA-00153-552;MA-00072-309	MA-00153-552;MA-00072-309	1;1	1;1	1;1	;	2	1	1	1	1	0	0	0	1	1	1	0	1	0	0	0	0	1	0	0	1	0	1	1	0	0	0	0	1	0	0	0	1	1	1	0	1	0	0	0	0	1	0	0
MA-00153-553;MA-00072-310	MA-00153-553;MA-00072-310	7;7	7;7	7;7	;	2	7	7	7	6	4	4	4	6	6	7	4	6	5	6	6	3	5	5	3	4	4	5	4	5	3	4	5	6	4	4	4	6	6	7	4	6	5	6	6	3	5	5	3
MA-00072-311	MA-00072-311	6	6	6		1	6	6	6	4	5	4	5	5	3	4	4	3	4	4	4	4	1	2	1	3	2	1	2	4	3	4	5	4	5	4	5	5	3	4	4	3	4	4	4	4	1	2	1
MA-00072-32	MA-00072-32	20	20	20		1	20	20	20	13	11	10	12	10	14	13	11	11	11	14	12	18	17	17	18	16	16	18	18	14	14	15	17	13	11	10	12	10	14	13	11	11	11	14	12	18	17	17	18
MA-00072-320	MA-00072-320	3	3	3		1	3	3	3	2	2	3	2	3	2	3	2	2	1	2	0	0	0	0	1	2	1	2	1	2	2	2	2	2	2	3	2	3	2	3	2	2	1	2	0	0	0	0	1
MA-00072-322	MA-00072-322	2	2	2		1	2	2	2	1	0	0	1	0	0	2	0	0	0	0	0	1	0	0	1	1	1	1	0	0	0	0	0	1	0	0	1	0	0	2	0	0	0	0	0	1	0	0	1
MA-00072-324	MA-00072-324	12	12	12		1	12	12	12	9	8	8	10	9	10	8	8	6	8	7	10	6	10	11	7	9	8	9	8	8	10	9	8	9	8	8	10	9	10	8	8	6	8	7	10	6	10	11	7
MA-00072-329	MA-00072-329	9	9	9		1	9	9	9	3	3	2	2	3	3	3	2	1	1	3	4	6	5	3	5	6	2	3	8	4	2	3	4	3	3	2	2	3	3	3	2	1	1	3	4	6	5	3	5
MA-00072-330	MA-00072-330	5	5	5		1	5	5	5	1	1	1	0	0	0	1	0	0	1	1	0	3	1	3	3	1	1	1	1	2	0	1	1	1	1	1	0	0	0	1	0	0	1	1	0	3	1	3	3
MA-00072-331	MA-00072-331	12	6	6		1	12	6	6	7	6	5	7	7	8	6	7	6	6	6	8	6	6	6	6	5	9	6	7	8	8	7	8	3	2	2	3	2	4	3	2	2	2	3	4	1	1	1	0
MA-00072-332	MA-00072-332	23	23	23		1	23	23	23	20	21	20	22	21	22	21	20	19	20	21	20	17	18	19	18	20	19	22	20	23	21	22	22	20	21	20	22	21	22	21	20	19	20	21	20	17	18	19	18
MA-00072-333	MA-00072-333	7	4	4		1	7	4	4	2	1	2	2	2	2	3	4	2	3	5	3	2	2	3	1	2	2	2	4	3	3	3	2	2	1	2	2	2	1	2	3	2	2	3	3	2	2	2	1
MA-00072-337	MA-00072-337	1	1	1		1	1	1	1	0	0	0	0	0	0	0	0	0	0	0	0	0	0	1	0	1	1	0	0	0	0	0	0	0	0	0	0	0	0	0	0	0	0	0	0	0	0	1	0
MA-00072-338	MA-00072-338	10	10	10		1	10	10	10	5	5	8	5	6	5	6	7	6	5	4	6	8	7	6	6	5	7	6	5	5	5	6	6	5	5	8	5	6	5	6	7	6	5	4	6	8	7	6	6
MA-00153-500;MA-00072-342	MA-00153-500;MA-00072-342	2;2	2;2	2;2	;	2	2	2	2	1	1	1	2	2	1	1	1	2	2	2	1	1	1	1	1	1	1	1	2	2	2	2	2	1	1	1	2	2	1	1	1	2	2	2	1	1	1	1	1
MA-00072-343	MA-00072-343	11	11	11		1	11	11	11	4	5	2	5	5	6	5	4	5	6	5	4	2	1	4	0	2	2	3	5	3	5	3	3	4	5	2	5	5	6	5	4	5	6	5	4	2	1	4	0
MA-00072-352	MA-00072-352	2	2	2		1	2	2	2	1	0	1	1	1	1	1	1	0	1	0	1	1	1	1	0	1	1	1	1	1	1	1	1	1	0	1	1	1	1	1	1	0	1	0	1	1	1	1	0
MA-00072-353	MA-00072-353	1	1	1		1	1	1	1	0	0	0	0	0	0	0	0	0	0	0	0	0	0	0	0	0	1	0	0	0	0	0	0	0	0	0	0	0	0	0	0	0	0	0	0	0	0	0	0
MA-00072-36	MA-00072-36	12	12	12		1	12	12	12	8	8	6	9	6	8	9	9	7	9	7	9	9	10	11	10	10	8	11	10	10	9	9	11	8	8	6	9	6	8	9	9	7	9	7	9	9	10	11	10
MA-00072-37	MA-00072-37	3	3	3		1	3	3	3	2	1	1	3	2	3	2	3	2	3	2	2	2	2	1	1	2	2	1	2	2	2	2	3	2	1	1	3	2	3	2	3	2	3	2	2	2	2	1	1
MA-00072-4	MA-00072-4	17	16	16		1	17	16	16	9	10	10	11	10	7	9	9	5	7	6	9	14	14	13	12	13	11	13	13	13	11	13	11	9	9	9	10	10	7	9	8	5	7	6	9	13	13	12	11
MA-00072-41	MA-00072-41	3	3	3		1	3	3	3	0	0	0	1	1	0	0	0	0	0	0	0	2	3	2	3	2	2	1	1	0	0	1	0	0	0	0	1	1	0	0	0	0	0	0	0	2	3	2	3
MA-00072-48	MA-00072-48	43	43	24		1	43	43	24	35	37	39	37	37	35	35	36	34	32	34	35	37	37	38	34	37	37	39	39	37	36	37	36	35	37	39	37	37	35	35	36	34	32	34	35	37	37	38	34
MA-00072-53	MA-00072-53	4	4	4		1	4	4	4	1	2	1	2	2	3	1	1	2	2	1	1	2	3	2	1	3	3	2	2	2	2	1	2	1	2	1	2	2	3	1	1	2	2	1	1	2	3	2	1
MA-00072-65	MA-00072-65	3	3	3		1	3	3	3	0	1	1	2	0	0	0	0	0	0	0	0	0	0	0	0	0	0	0	0	0	0	0	0	0	1	1	2	0	0	0	0	0	0	0	0	0	0	0	0
MA-00072-66	MA-00072-66	4	4	4		1	4	4	4	1	0	1	2	0	1	0	1	1	1	1	0	4	3	2	2	2	2	2	2	1	0	1	1	1	0	1	2	0	1	0	1	1	1	1	0	4	3	2	2
MA-00072-67	MA-00072-67	9	9	9		1	9	9	9	5	5	4	7	4	4	7	6	6	6	2	3	4	4	3	4	4	5	4	5	6	7	6	6	5	5	4	7	4	4	7	6	6	6	2	3	4	4	3	4
MA-00072-68	MA-00072-68	8	8	8		1	8	8	8	4	5	3	8	6	6	3	4	5	4	5	4	4	6	5	4	3	6	4	6	6	6	3	5	4	5	3	8	6	6	3	4	5	4	5	4	4	6	5	4
MA-00072-69	MA-00072-69	4	4	4		1	4	4	4	0	0	0	1	0	2	1	1	1	2	2	1	3	1	1	3	2	3	1	2	1	1	1	1	0	0	0	1	0	2	1	1	1	2	2	1	3	1	1	3
MA-00072-70	MA-00072-70	2	2	2		1	2	2	2	0	0	0	0	1	1	0	1	1	0	1	1	2	0	0	1	1	1	1	0	1	1	1	0	0	0	0	0	1	1	0	1	1	0	1	1	2	0	0	1
MA-00072-77	MA-00072-77	15	15	15		1	15	15	15	10	10	11	13	12	10	12	12	7	10	10	9	11	9	11	10	13	9	11	11	8	12	11	11	10	10	11	13	12	10	12	12	7	10	10	9	11	9	11	10
MA-00072-79	MA-00072-79	4	4	4		1	4	4	4	3	1	1	1	2	2	2	1	2	1	1	1	1	2	1	2	1	2	2	2	2	2	2	1	3	1	1	1	2	2	2	1	2	1	1	1	1	2	1	2
MA-00072-8	MA-00072-8	3	3	3		1	3	3	3	1	1	1	1	1	1	1	1	2	0	1	1	0	1	1	1	1	1	1	1	1	0	1	1	1	1	1	1	1	1	1	1	2	0	1	1	0	1	1	1
MA-00072-80	MA-00072-80	7	7	7		1	7	7	7	1	0	1	3	2	2	1	1	2	1	1	1	3	5	5	5	4	3	6	6	1	0	0	0	1	0	1	3	2	2	1	1	2	1	1	1	3	5	5	5
MA-00072-82	MA-00072-82	1	1	1		1	1	1	1	1	1	0	1	1	0	1	0	0	1	1	1	1	1	1	1	1	0	1	0	1	1	1	1	1	1	0	1	1	0	1	0	0	1	1	1	1	1	1	1
MA-00072-86	MA-00072-86	7	7	1		1	7	7	1	5	6	5	6	6	5	5	6	3	4	5	5	5	6	5	4	6	6	5	5	5	5	6	5	5	6	5	6	6	5	5	6	3	4	5	5	5	6	5	4
MA-00072-87	MA-00072-87	3	3	3		1	3	3	3	1	1	1	1	2	0	1	2	0	0	0	0	2	1	2	2	0	1	1	1	1	0	1	1	1	1	1	1	2	0	1	2	0	0	0	0	2	1	2	2
MA-00072-88	MA-00072-88	1	1	1		1	1	1	1	0	1	1	0	1	1	1	1	0	1	1	0	0	0	0	0	0	0	0	0	0	0	0	0	0	1	1	0	1	1	1	1	0	1	1	0	0	0	0	0
MA-00072-9	MA-00072-9	5	3	3		1	5	3	3	3	4	2	3	3	3	4	3	4	3	4	3	4	5	4	5	4	5	4	4	2	3	3	3	1	2	1	1	1	1	2	1	2	1	2	2	2	3	2	3
MA-00072-90	MA-00072-90	36	36	36		1	36	36	36	29	30	28	28	30	30	30	29	29	26	28	29	26	34	34	32	33	33	30	34	29	32	29	31	29	30	28	28	30	30	30	29	29	26	28	29	26	34	34	32
MA-00072-91	MA-00072-91	3	1	1		1	3	1	1	2	2	2	2	2	2	2	2	2	2	2	2	2	2	2	2	2	1	3	2	2	2	2	2	1	1	1	1	1	1	1	1	1	1	1	1	1	1	1	1
MA-00072-98	MA-00072-98	18	10	10		1	18	10	10	13	11	10	12	11	11	9	10	13	10	8	11	11	12	12	11	11	9	11	10	9	11	9	11	6	4	3	5	4	4	3	3	6	4	2	4	4	5	5	4
MA-00072-99	MA-00072-99	4	4	4		1	4	4	4	1	1	0	0	0	1	0	0	2	0	0	1	2	1	2	2	2	0	2	3	1	2	2	2	1	1	0	0	0	1	0	0	2	0	0	1	2	1	2	2
MA-00073-10	MA-00073-10	39	20	20		1	39	20	20	38	36	37	35	36	36	35	35	33	32	34	33	22	19	23	19	26	27	29	28	32	31	34	32	19	18	18	18	17	18	18	17	16	15	17	15	6	2	5	3
MA-00073-104	MA-00073-104	28	28	20		1	28	28	20	22	23	22	23	22	21	22	22	16	19	19	21	25	25	23	20	23	21	25	21	22	18	22	22	22	23	22	23	22	21	22	22	16	19	19	21	25	25	23	20
MA-00073-115	MA-00073-115	11	11	11		1	11	11	11	1	0	1	1	2	1	0	1	1	2	1	2	4	7	7	7	1	5	2	4	2	1	2	1	1	0	1	1	2	1	0	1	1	2	1	2	4	7	7	7
MA-00073-116	MA-00073-116	2	2	2		1	2	2	2	1	0	0	1	0	1	0	0	0	0	0	0	0	2	1	0	1	1	0	0	1	0	0	1	1	0	0	1	0	1	0	0	0	0	0	0	0	2	1	0
MA-00073-118	MA-00073-118	16	15	14		1	16	15	14	0	2	1	0	0	1	1	1	2	1	2	2	11	11	12	11	10	8	8	10	1	4	3	2	0	1	0	0	0	1	0	1	1	0	1	1	11	11	12	11
MA-00073-124	MA-00073-124	1	1	1		1	1	1	1	1	1	1	1	1	1	1	1	1	1	1	1	1	1	1	1	1	1	1	1	1	1	1	1	1	1	1	1	1	1	1	1	1	1	1	1	1	1	1	1
MA-00073-127	MA-00073-127	38	38	37		1	38	38	37	32	33	35	32	34	35	35	34	32	33	34	36	26	27	29	24	26	27	30	31	29	29	33	32	32	33	35	32	34	35	35	34	32	33	34	36	26	27	29	24
546102;546103;546104;546105;546106;546107;546108;546109;546110;546111;546112;546113;546114;546115;546116;546117;546118;546119;546120;546121;546122;546123;546124;546125;546126;546127;546128;546129;546130;546131;546132;546133;546134;546135;546136;546137;546138;546139;546140;546141;546142;546143;546144;546145;546146;546147;546148;546149;546150;546151;546152;546153;546154;546155;546156;546157;546158;…	8539;8540;8541;8542;8543;8544;8545;8546;8547;8548;8549;8550;8551;8552;8553;8554;8555;8556;8557;8558;8559;8560;8561;8562;8563;8564;8565;8566;8567;8568;8569;8570;8571;8572;8573;8574;8575;8576;8577;8578;8579;8580;8581;8582;8583;8584;8585;8586;8587;8588;8589;8590;8591;8592;8593;8594;8595;8596;8597;8598;8599;8600;8601;8602;8603;8604;8605;8606;8607;8608;8609;8610;8611;8612;22942;22943;22944;22945;22946…	8575;22956;22970;24881;51060;54151;60667;60678;64817;69120;74481;74557;128137;128346;131934;132034;132188;149792;167050;169525;169676;169737;230373;234129;273136;301407;302539;302548;303987;305937;308001;321835;344815;360311;360469;378621;430929;431389	141;142;143;144;145;146;147;148;149;1254;1255;1256	119;120;121;122;123	81;84;226;232;233;324;331;416;429;449;450;458	66;206;259;385;393
MA-00073-128	MA-00073-128	2	2	2		1	2	2	2	1	1	1	1	1	1	1	1	1	0	1	0	0	0	1	1	1	1	2	0	1	1	1	1	1	1	1	1	1	1	1	1	1	0	1	0	0	0	1	1
MA-00073-13	MA-00073-13	3	3	3		1	3	3	3	3	3	3	3	2	3	3	2	3	2	3	3	2	3	3	2	3	3	3	3	3	3	3	3	3	3	3	3	2	3	3	2	3	2	3	3	2	3	3	2
MA-00073-133	MA-00073-133	1	1	1		1	1	1	1	0	0	0	0	0	0	0	1	0	0	0	0	0	0	0	0	0	0	0	0	0	0	1	0	0	0	0	0	0	0	0	1	0	0	0	0	0	0	0	0
MA-00073-134;MA-00139-57	MA-00073-134	8;2	8;2	8;2		2	8	8	8	1	3	1	3	1	2	1	1	1	1	0	3	5	5	5	3	7	5	3	6	1	3	1	2	1	3	1	3	1	2	1	1	1	1	0	3	5	5	5	3
MA-00073-138	MA-00073-138	1	1	1		1	1	1	1	0	0	0	0	1	0	0	0	0	0	0	0	1	1	1	1	1	0	1	1	0	0	0	0	0	0	0	0	1	0	0	0	0	0	0	0	1	1	1	1
MA-00073-144	MA-00073-144	4	4	4		1	4	4	4	4	4	4	4	3	4	4	4	3	3	3	4	3	4	4	2	3	4	4	4	4	3	4	3	4	4	4	4	3	4	4	4	3	3	3	4	3	4	4	2
MA-00073-145	MA-00073-145	13	13	13		1	13	13	13	7	6	10	7	11	11	10	9	8	10	8	8	9	10	10	7	10	11	11	10	9	11	10	8	7	6	10	7	11	11	10	9	8	10	8	8	9	10	10	7
MA-00073-146	MA-00073-146	11	11	11		1	11	11	11	6	7	4	8	7	4	8	4	4	7	6	7	6	7	6	7	6	8	5	6	7	7	6	6	6	7	4	8	7	4	8	4	4	7	6	7	6	7	6	7
MA-00073-147	MA-00073-147	24	24	24		1	24	24	24	12	11	9	11	11	12	11	9	8	13	13	10	22	20	19	18	16	16	14	18	14	12	15	16	12	11	9	11	11	12	11	9	8	13	13	10	22	20	19	18
MA-00073-149	MA-00073-149	14	14	8		1	14	14	8	11	14	10	13	12	11	12	11	10	11	10	11	7	13	14	9	12	10	13	13	11	11	14	12	11	14	10	13	12	11	12	11	10	11	10	11	7	13	14	9
MA-00073-151	MA-00073-151	3	3	3		1	3	3	3	0	0	0	0	0	0	0	0	0	0	0	0	2	0	2	2	1	0	0	1	0	0	0	0	0	0	0	0	0	0	0	0	0	0	0	0	2	0	2	2
MA-00073-154;MA-00072-148	MA-00073-154	5;2	5;2	5;2		2	5	5	5	4	2	2	4	3	3	3	4	2	3	4	2	3	4	2	4	4	3	4	3	3	4	3	4	4	2	2	4	3	3	3	4	2	3	4	2	3	4	2	4
MA-00073-156	MA-00073-156	3	3	3		1	3	3	3	3	3	3	3	3	3	3	3	3	2	3	3	0	1	1	2	2	1	2	1	3	3	3	3	3	3	3	3	3	3	3	3	3	2	3	3	0	1	1	2
MA-00073-159	MA-00073-159	11	11	10		1	11	11	10	10	10	10	10	10	10	10	10	9	9	9	10	9	8	9	8	9	8	8	9	9	9	9	10	10	10	10	10	10	10	10	10	9	9	9	10	9	8	9	8
MA-00073-16	MA-00073-16	2	2	2		1	2	2	2	0	0	0	0	0	0	0	0	0	0	0	0	2	1	1	2	1	0	0	1	0	0	0	0	0	0	0	0	0	0	0	0	0	0	0	0	2	1	1	2
MA-00073-162	MA-00073-162	1	1	1		1	1	1	1	0	1	0	1	1	0	1	1	0	1	1	1	1	0	0	0	0	0	0	1	0	0	0	0	0	1	0	1	1	0	1	1	0	1	1	1	1	0	0	0
MA-00073-166	MA-00073-166	1	1	1		1	1	1	1	0	0	0	0	0	0	1	0	0	0	1	0	0	0	0	0	0	0	0	0	0	0	0	0	0	0	0	0	0	0	1	0	0	0	1	0	0	0	0	0
MA-00073-167	MA-00073-167	9	9	9		1	9	9	9	4	5	3	5	6	5	6	5	6	2	4	5	2	6	6	2	6	4	5	7	4	5	4	6	4	5	3	5	6	5	6	5	6	2	4	5	2	6	6	2
MA-00073-174;MA-00067-195	MA-00073-174	14;1	14;1	14;1		2	14	14	14	11	12	11	9	11	12	10	9	10	11	9	11	10	9	10	7	11	8	10	12	10	8	9	9	11	12	11	9	11	12	10	9	10	11	9	11	10	9	10	7
MA-00073-180;MA-00067-204;MA-00297-288	MA-00073-180	6;2;1	6;2;1	6;2;1		3	6	6	6	3	3	2	2	3	1	3	1	1	0	1	0	3	4	2	4	3	2	4	3	3	3	1	2	3	3	2	2	3	1	3	1	1	0	1	0	3	4	2	4
MA-00073-182	MA-00073-182	1	1	1		1	1	1	1	0	1	0	0	1	0	0	0	1	0	0	0	1	1	1	1	1	1	1	0	1	0	1	1	0	1	0	0	1	0	0	0	1	0	0	0	1	1	1	1
MA-00073-188	MA-00073-188	1	1	1		1	1	1	1	0	0	0	0	0	0	0	0	0	0	0	0	0	0	0	0	1	0	0	0	0	0	0	0	0	0	0	0	0	0	0	0	0	0	0	0	0	0	0	0
MA-00073-2	MA-00073-2	6	6	6		1	6	6	6	0	0	1	1	0	0	1	0	0	0	1	1	2	2	2	1	1	0	1	3	1	0	0	1	0	0	1	1	0	0	1	0	0	0	1	1	2	2	2	1
MA-00073-204	MA-00073-204	30	30	30		1	30	30	30	20	24	19	24	22	24	19	21	16	17	18	19	22	23	25	24	23	25	26	27	24	24	27	25	20	24	19	24	22	24	19	21	16	17	18	19	22	23	25	24
MA-00073-210	MA-00073-210	7	1	1		1	7	1	1	7	6	7	7	7	7	6	6	7	6	7	6	6	6	6	6	6	6	6	6	6	7	6	6	1	1	1	1	1	1	1	1	1	1	1	1	1	1	1	1
MA-00073-214	MA-00073-214	1	1	1		1	1	1	1	0	0	0	0	0	0	0	0	0	0	0	0	0	0	1	0	0	0	0	0	0	0	0	0	0	0	0	0	0	0	0	0	0	0	0	0	0	0	1	0
MA-00073-216	MA-00073-216	1	1	1		1	1	1	1	0	0	1	0	1	1	0	1	0	1	0	0	0	0	0	0	0	1	0	0	0	1	0	0	0	0	1	0	1	1	0	1	0	1	0	0	0	0	0	0
MA-00073-218	MA-00073-218	5	5	5		1	5	5	5	3	4	4	3	3	4	4	3	3	5	2	4	4	4	2	3	4	4	4	4	4	4	4	4	3	4	4	3	3	4	4	3	3	5	2	4	4	4	2	3
MA-00073-219	MA-00073-219	30	30	30		1	30	30	30	18	17	20	19	18	17	18	14	10	12	14	14	15	22	20	13	16	18	22	21	12	9	16	14	18	17	20	19	18	17	18	14	10	12	14	14	15	22	20	13
MA-00073-221	MA-00073-221	4	4	4		1	4	4	4	1	2	1	2	3	2	2	2	0	1	0	1	2	2	3	2	2	1	2	1	3	2	1	2	1	2	1	2	3	2	2	2	0	1	0	1	2	2	3	2
MA-00073-224	MA-00073-224	4	4	4		1	4	4	4	0	1	0	0	0	0	0	0	0	0	1	0	2	1	0	1	0	0	0	0	2	1	0	1	0	1	0	0	0	0	0	0	0	0	1	0	2	1	0	1
MA-00073-226	MA-00073-226	1	1	1		1	1	1	1	1	1	0	1	1	1	1	0	1	1	0	1	1	1	1	1	1	1	1	1	1	1	0	1	1	1	0	1	1	1	1	0	1	1	0	1	1	1	1	1
MA-00073-230	MA-00073-230	8	8	8		1	8	8	8	8	8	8	6	7	7	6	6	7	6	6	7	5	6	7	6	6	6	6	6	7	8	7	6	8	8	8	6	7	7	6	6	7	6	6	7	5	6	7	6
MA-00073-234	MA-00073-234	7	7	7		1	7	7	7	3	2	2	5	4	2	4	4	4	2	3	3	1	2	3	1	1	2	2	1	4	3	4	3	3	2	2	5	4	2	4	4	4	2	3	3	1	2	3	1
MA-00073-238	MA-00073-238	1	1	1		1	1	1	1	0	1	0	0	0	0	0	0	1	0	0	0	0	0	0	0	0	0	0	0	1	0	1	0	0	1	0	0	0	0	0	0	1	0	0	0	0	0	0	0
MA-00073-24	MA-00073-24	2	2	2		1	2	2	2	2	2	1	0	1	1	1	0	1	1	0	0	1	1	0	1	2	1	0	1	1	1	0	1	2	2	1	0	1	1	1	0	1	1	0	0	1	1	0	1
MA-00073-245	MA-00073-245	3	3	3		1	3	3	3	1	2	1	2	1	0	2	0	0	0	0	0	1	2	3	2	2	1	1	1	3	3	2	3	1	2	1	2	1	0	2	0	0	0	0	0	1	2	3	2
MA-00073-246	MA-00073-246	1	1	1		1	1	1	1	1	1	1	1	1	1	1	0	0	1	0	0	0	1	1	0	1	1	1	1	1	1	1	1	1	1	1	1	1	1	1	0	0	1	0	0	0	1	1	0
MA-00073-247	MA-00073-247	2	2	2		1	2	2	2	1	0	0	1	0	0	1	0	1	1	1	0	2	1	1	2	1	2	1	2	0	1	1	0	1	0	0	1	0	0	1	0	1	1	1	0	2	1	1	2
MA-00073-248	MA-00073-248	2	2	2		1	2	2	2	0	0	0	0	0	0	0	0	0	0	0	0	1	0	1	0	0	0	0	0	0	0	0	0	0	0	0	0	0	0	0	0	0	0	0	0	1	0	1	0
MA-00073-252	MA-00073-252	1	1	1		1	1	1	1	0	0	0	0	1	0	0	0	0	0	0	0	0	0	0	0	0	0	0	0	1	0	1	1	0	0	0	0	1	0	0	0	0	0	0	0	0	0	0	0
MA-00073-256	MA-00073-256	6	6	6		1	6	6	6	5	4	2	4	5	5	4	5	2	1	0	2	2	4	3	2	4	2	4	5	2	2	1	4	5	4	2	4	5	5	4	5	2	1	0	2	2	4	3	2
MA-00073-258	MA-00073-258	16	16	4		1	16	16	4	11	11	11	12	13	13	13	12	12	12	12	11	12	16	14	11	12	12	14	15	13	12	13	13	11	11	11	12	13	13	13	12	12	12	12	11	12	16	14	11
MA-00073-259	MA-00073-259	4	4	4		1	4	4	4	2	1	1	1	2	1	2	2	2	1	2	1	1	2	1	0	2	1	1	0	3	2	1	2	2	1	1	1	2	1	2	2	2	1	2	1	1	2	1	0
MA-00073-26	MA-00073-26	6	6	6		1	6	6	6	1	2	1	1	1	1	1	2	1	1	3	1	2	0	1	1	1	1	1	1	1	1	2	1	1	2	1	1	1	1	1	2	1	1	3	1	2	0	1	1
MA-00073-261	MA-00073-261	4	2	2		1	4	2	2	2	3	1	2	2	3	3	2	3	3	3	2	3	4	2	2	3	3	2	3	3	2	3	2	1	2	0	1	1	1	2	1	1	1	1	0	1	2	1	0
MA-00073-262	MA-00073-262	14	7	7		1	14	7	7	11	10	8	9	11	11	8	9	8	7	8	7	8	9	8	8	9	13	10	10	10	10	11	9	5	4	2	3	5	5	3	3	4	3	4	4	3	2	2	3
MA-00073-263	MA-00073-263	29	29	29		1	29	29	29	17	18	11	14	16	13	12	10	8	9	11	10	22	22	24	21	17	22	20	23	16	14	16	19	17	18	11	14	16	13	12	10	8	9	11	10	22	22	24	21
MA-00073-265	MA-00073-265	8	8	8		1	8	8	8	5	6	4	5	6	7	3	6	6	7	5	6	5	5	5	5	6	5	6	4	6	4	6	5	5	6	4	5	6	7	3	6	6	7	5	6	5	5	5	5
MA-00073-266	MA-00073-266	3	3	3		1	3	3	3	3	0	1	2	0	1	1	1	1	2	0	0	3	3	2	3	3	3	2	2	2	2	3	1	3	0	1	2	0	1	1	1	1	2	0	0	3	3	2	3
MA-00073-268	MA-00073-268	2	2	2		1	2	2	2	2	2	1	1	2	1	2	1	1	2	1	1	1	1	1	1	1	1	1	2	2	1	2	1	2	2	1	1	2	1	2	1	1	2	1	1	1	1	1	1
MA-00073-27	MA-00073-27	15	15	15		1	15	15	15	14	15	15	14	14	12	15	15	13	12	13	13	12	15	14	12	12	13	15	15	13	12	15	15	14	15	15	14	14	12	15	15	13	12	13	13	12	15	14	12
MA-00073-270;MA-00067-300	MA-00073-270;MA-00067-300	6;3	6;3	6;3	;	2	6	6	6	4	5	5	4	5	3	4	5	2	3	3	1	2	3	4	2	3	4	4	4	4	4	3	4	4	5	5	4	5	3	4	5	2	3	3	1	2	3	4	2
MA-00073-274	MA-00073-274	13	13	13		1	13	13	13	5	4	5	6	6	7	4	5	2	3	2	5	6	8	10	6	6	5	9	7	5	4	6	5	5	4	5	6	6	7	4	5	2	3	2	5	6	8	10	6
MA-00073-275	MA-00073-275	7	7	7		1	7	7	7	2	2	3	5	1	1	2	2	2	4	2	2	1	1	3	1	4	2	3	1	0	2	3	2	2	2	3	5	1	1	2	2	2	4	2	2	1	1	3	1
MA-00073-279	MA-00073-279	5	5	5		1	5	5	5	3	2	2	2	2	1	3	3	1	1	2	0	3	2	3	4	3	3	5	4	3	2	3	3	3	2	2	2	2	1	3	3	1	1	2	0	3	2	3	4
MA-00073-28	MA-00073-28	5	5	3		1	5	5	3	0	1	1	0	0	1	1	0	1	1	0	1	0	2	1	1	1	0	0	0	1	1	0	1	0	1	1	0	0	1	1	0	1	1	0	1	0	2	1	1
MA-00073-280	MA-00073-280	3	3	3		1	3	3	3	1	0	1	2	2	2	2	2	1	1	2	1	1	0	0	0	1	1	1	0	2	1	0	2	1	0	1	2	2	2	2	2	1	1	2	1	1	0	0	0
MA-00073-281	MA-00073-281	16	16	16		1	16	16	16	11	8	9	9	8	8	9	8	7	10	7	7	12	15	13	12	13	12	13	13	9	9	10	8	11	8	9	9	8	8	9	8	7	10	7	7	12	15	13	12
MA-00073-283	MA-00073-283	3	3	3		1	3	3	3	1	1	0	1	0	2	0	2	0	1	1	2	0	2	0	1	2	1	1	1	2	1	0	2	1	1	0	1	0	2	0	2	0	1	1	2	0	2	0	1
MA-00073-288	MA-00073-288	3	3	3		1	3	3	3	3	1	0	2	2	2	2	0	0	1	1	1	1	2	2	1	1	0	1	1	1	1	1	1	3	1	0	2	2	2	2	0	0	1	1	1	1	2	2	1
MA-00073-289	MA-00073-289	6	6	6		1	6	6	6	3	1	1	3	3	1	2	1	1	1	0	0	2	0	0	0	1	2	0	1	3	3	5	3	3	1	1	3	3	1	2	1	1	1	0	0	2	0	0	0
MA-00073-290	MA-00073-290	6	6	6		1	6	6	6	4	3	6	4	5	3	4	5	4	4	4	5	4	2	2	2	3	3	2	2	2	3	2	4	4	3	6	4	5	3	4	5	4	4	4	5	4	2	2	2
MA-00073-294	MA-00073-294	1	1	1		1	1	1	1	1	1	1	1	1	1	1	1	1	1	1	1	1	1	1	1	1	1	1	1	1	1	1	1	1	1	1	1	1	1	1	1	1	1	1	1	1	1	1	1
MA-00073-295	MA-00073-295	6	6	5		1	6	6	5	1	1	1	3	0	2	2	2	2	2	2	2	2	2	1	1	2	2	2	3	1	1	2	1	1	1	1	3	0	2	2	2	2	2	2	2	2	2	1	1
MA-00073-298	MA-00073-298	12	12	12		1	12	12	12	11	8	6	10	9	7	10	10	10	9	8	7	7	9	9	8	5	7	11	10	10	9	11	6	11	8	6	10	9	7	10	10	10	9	8	7	7	9	9	8
MA-00073-299	MA-00073-299	13	13	12		1	13	13	12	5	4	2	2	3	5	6	3	3	3	3	3	5	3	4	5	3	3	3	3	7	6	5	5	5	4	2	2	3	5	6	3	3	3	3	3	5	3	4	5
MA-00073-30	MA-00073-30	4	4	4		1	4	4	4	1	2	2	3	1	2	0	1	1	3	3	3	0	0	0	0	1	0	0	0	2	1	2	2	1	2	2	3	1	2	0	1	1	3	3	3	0	0	0	0
MA-00073-302	MA-00073-302	3	3	3		1	3	3	3	2	2	3	2	2	1	3	3	1	0	3	3	1	1	1	2	1	0	1	0	1	2	1	1	2	2	3	2	2	1	3	3	1	0	3	3	1	1	1	2
MA-00073-304	MA-00073-304	2	2	2		1	2	2	2	1	0	1	0	2	0	0	0	2	2	1	0	2	1	2	2	2	2	2	2	0	0	1	1	1	0	1	0	2	0	0	0	2	2	1	0	2	1	2	2
MA-00073-308	MA-00073-308	4	4	4		1	4	4	4	1	2	3	3	2	3	2	1	2	2	3	3	4	3	3	4	4	3	3	3	3	2	4	4	1	2	3	3	2	3	2	1	2	2	3	3	4	3	3	4
MA-00073-312	MA-00073-312	24	24	24		1	24	24	24	21	20	22	20	21	22	19	21	19	18	15	21	18	23	22	19	20	19	21	24	22	21	22	22	21	20	22	20	21	22	19	21	19	18	15	21	18	23	22	19
MA-00073-313	MA-00073-313	16	16	16		1	16	16	16	9	7	5	8	10	8	7	6	6	5	6	7	8	13	13	7	9	8	8	10	8	6	9	7	9	7	5	8	10	8	7	6	6	5	6	7	8	13	13	7
MA-00073-314	MA-00073-314	6	6	6		1	6	6	6	3	3	2	3	5	4	4	4	4	3	4	4	5	3	4	1	4	4	3	4	3	2	2	3	3	3	2	3	5	4	4	4	4	3	4	4	5	3	4	1
MA-00073-318	MA-00073-318	7	7	7		1	7	7	7	1	3	1	3	1	3	0	0	1	2	1	3	3	3	3	2	2	3	1	2	3	1	3	2	1	3	1	3	1	3	0	0	1	2	1	3	3	3	3	2
MA-00073-322	MA-00073-322	7	6	6		1	7	6	6	3	3	3	3	6	4	6	4	4	5	5	6	0	2	1	2	2	2	3	2	3	5	5	5	2	2	2	2	5	3	5	3	3	4	4	5	0	1	0	1
MA-00073-323	MA-00073-323	6	6	6		1	6	6	6	1	1	0	0	2	2	0	1	1	2	2	3	2	3	3	3	3	2	4	2	2	2	3	3	1	1	0	0	2	2	0	1	1	2	2	3	2	3	3	3
MA-00073-327	MA-00073-327	3	3	3		1	3	3	3	1	1	1	1	1	2	1	1	1	1	1	1	1	2	2	1	1	1	1	2	2	1	1	2	1	1	1	1	1	2	1	1	1	1	1	1	1	2	2	1
MA-00073-329	MA-00073-329	3	3	3		1	3	3	3	2	2	1	1	0	1	2	2	1	2	2	2	1	1	0	1	1	2	1	1	1	1	1	2	2	2	1	1	0	1	2	2	1	2	2	2	1	1	0	1
MA-00073-338	MA-00073-338	5	5	5		1	5	5	5	2	2	3	2	2	2	0	2	1	2	3	2	1	2	1	2	2	2	1	1	2	2	2	2	2	2	3	2	2	2	0	2	1	2	3	2	1	2	1	2
MA-00073-339	MA-00073-339	4	4	4		1	4	4	4	1	1	1	3	2	1	1	1	1	0	0	1	1	1	1	1	1	0	1	1	1	3	3	1	1	1	1	3	2	1	1	1	1	0	0	1	1	1	1	1
MA-00073-340	MA-00073-340	8	8	8		1	8	8	8	5	6	4	5	3	4	5	6	5	5	4	3	4	5	6	4	7	3	5	2	5	6	5	6	5	6	4	5	3	4	5	6	5	5	4	3	4	5	6	4
MA-00073-341	MA-00073-341	1	1	1		1	1	1	1	0	0	1	0	0	1	0	0	0	1	1	0	0	0	0	0	0	1	0	0	1	0	1	0	0	0	1	0	0	1	0	0	0	1	1	0	0	0	0	0
MA-00073-342	MA-00073-342	13	13	13		1	13	13	13	9	9	7	8	8	8	9	10	10	10	11	11	1	5	2	5	3	2	5	5	8	6	6	7	9	9	7	8	8	8	9	10	10	10	11	11	1	5	2	5
MA-00073-349	MA-00073-349	2	2	2		1	2	2	2	0	0	0	0	0	0	0	0	0	0	0	0	0	1	0	0	0	0	0	1	0	0	0	0	0	0	0	0	0	0	0	0	0	0	0	0	0	1	0	0
MA-00073-354;MA-00073-637	MA-00073-354;MA-00073-637	5;3	5;3	5;3	;	2	5	5	5	3	2	1	2	1	1	3	2	1	2	1	1	1	1	2	2	2	2	2	2	2	1	1	4	3	2	1	2	1	1	3	2	1	2	1	1	1	1	2	2
MA-00073-355	MA-00073-355	13	13	6		1	13	13	6	9	7	8	11	11	9	11	9	8	11	10	9	10	12	11	9	11	11	9	11	10	10	7	9	9	7	8	11	11	9	11	9	8	11	10	9	10	12	11	9
MA-00073-357	MA-00073-357	14	14	14		1	14	14	14	5	4	3	3	6	6	7	5	12	11	9	12	2	2	3	3	1	0	2	0	1	4	3	2	5	4	3	3	6	6	7	5	12	11	9	12	2	2	3	3
MA-00073-36	MA-00073-36	2	2	2		1	2	2	2	0	0	0	0	0	0	0	0	1	0	0	0	0	1	0	0	0	0	1	1	1	0	0	0	0	0	0	0	0	0	0	0	1	0	0	0	0	1	0	0
MA-00073-363	MA-00073-363	3	3	2		1	3	3	2	1	1	2	1	2	2	2	1	2	2	2	3	0	1	1	1	0	0	1	0	0	0	0	0	1	1	2	1	2	2	2	1	2	2	2	3	0	1	1	1
MA-00073-365	MA-00073-365	1	1	1		1	1	1	1	0	0	0	0	1	0	0	0	0	0	0	0	0	0	0	0	0	1	0	0	0	0	0	0	0	0	0	0	1	0	0	0	0	0	0	0	0	0	0	0
MA-00073-366	MA-00073-366	34	10	10		1	34	10	10	20	19	19	20	24	18	20	21	21	18	21	21	22	25	29	28	22	21	25	29	21	21	18	19	4	4	3	4	6	4	4	5	6	4	6	6	6	8	9	8
MA-00073-371	MA-00073-371	1	1	1		1	1	1	1	1	0	0	1	1	1	1	1	1	1	1	1	1	1	1	1	1	1	1	1	1	1	1	1	1	0	0	1	1	1	1	1	1	1	1	1	1	1	1	1
MA-00073-373	MA-00073-373	5	5	5		1	5	5	5	3	4	1	2	2	4	2	3	4	1	3	2	0	1	1	0	1	1	2	2	2	3	2	3	3	4	1	2	2	4	2	3	4	1	3	2	0	1	1	0
MA-00073-374	MA-00073-374	4	4	4		1	4	4	4	3	1	2	2	3	2	2	1	2	2	3	2	0	0	0	0	0	0	0	2	2	2	1	1	3	1	2	2	3	2	2	1	2	2	3	2	0	0	0	0
MA-00073-375	MA-00073-375	3	3	3		1	3	3	3	3	3	2	2	2	1	1	2	1	1	1	1	1	0	1	0	2	0	1	1	2	0	1	1	3	3	2	2	2	1	1	2	1	1	1	1	1	0	1	0
MA-00073-376	MA-00073-376	4	4	4		1	4	4	4	2	3	2	2	3	2	4	3	2	3	3	2	2	1	2	1	2	1	2	2	2	4	1	2	2	3	2	2	3	2	4	3	2	3	3	2	2	1	2	1
MA-00073-377;MA-00073-580	MA-00073-377;MA-00073-580	3;3	3;3	3;3	;	2	3	3	3	1	2	0	0	1	0	2	1	0	2	0	1	1	1	2	1	0	0	1	0	0	2	2	2	1	2	0	0	1	0	2	1	0	2	0	1	1	1	2	1
MA-00073-381	MA-00073-381	3	3	3		1	3	3	3	2	1	1	2	3	3	3	3	1	2	2	2	2	2	3	1	3	3	2	2	2	1	1	1	2	1	1	2	3	3	3	3	1	2	2	2	2	2	3	1
MA-00073-382	MA-00073-382	1	1	1		1	1	1	1	0	0	0	0	0	1	1	0	0	0	0	0	0	1	0	0	0	0	0	1	0	0	0	0	0	0	0	0	0	1	1	0	0	0	0	0	0	1	0	0
MA-00073-384	MA-00073-384	5	5	4		1	5	5	4	3	4	4	3	3	2	3	4	4	2	4	3	5	5	4	2	3	3	3	3	3	4	4	3	3	4	4	3	3	2	3	4	4	2	4	3	5	5	4	2
MA-00073-388	MA-00073-388	11	11	11		1	11	11	11	7	10	9	9	11	9	9	11	11	11	11	10	8	9	6	7	9	9	8	9	11	10	10	7	7	10	9	9	11	9	9	11	11	11	11	10	8	9	6	7
MA-00073-392;MA-00210-224	MA-00073-392	4;1	4;1	4;1		2	4	4	4	4	1	1	2	2	1	1	2	1	0	1	0	0	1	1	0	0	0	1	3	2	4	3	2	4	1	1	2	2	1	1	2	1	0	1	0	0	1	1	0
MA-00073-394	MA-00073-394	15	15	15		1	15	15	15	14	11	13	12	14	13	12	12	13	11	12	11	13	13	12	14	11	11	12	11	13	13	12	14	14	11	13	12	14	13	12	12	13	11	12	11	13	13	12	14
MA-00073-407	MA-00073-407	4	4	4		1	4	4	4	4	2	2	3	3	3	4	3	3	2	1	2	2	1	2	2	3	2	3	2	3	3	3	2	4	2	2	3	3	3	4	3	3	2	1	2	2	1	2	2
MA-00073-414	MA-00073-414	27	27	27		1	27	27	27	19	20	18	20	22	20	19	21	20	21	22	21	15	19	19	14	16	18	21	21	20	21	21	17	19	20	18	20	22	20	19	21	20	21	22	21	15	19	19	14
MA-00073-417	MA-00073-417	20	20	20		1	20	20	20	14	9	8	10	11	12	12	10	12	8	13	10	15	16	15	12	13	14	13	15	13	11	14	12	14	9	8	10	11	12	12	10	12	8	13	10	15	16	15	12
MA-00073-419	MA-00073-419	2	2	2		1	2	2	2	1	1	1	2	1	1	1	1	1	1	0	2	0	1	1	0	1	1	0	1	1	1	2	1	1	1	1	2	1	1	1	1	1	1	0	2	0	1	1	0
MA-00073-42	MA-00073-42	1	1	1		1	1	1	1	0	1	0	0	0	0	1	0	0	0	0	1	0	0	0	0	0	0	0	0	0	0	0	0	0	1	0	0	0	0	1	0	0	0	0	1	0	0	0	0
MA-00073-420	MA-00073-420	1	1	1		1	1	1	1	1	1	1	1	1	1	1	1	0	0	0	1	0	1	1	0	1	1	1	1	0	0	1	1	1	1	1	1	1	1	1	1	0	0	0	1	0	1	1	0
MA-00073-421	MA-00073-421	9	9	7		1	9	9	7	5	5	4	6	7	5	5	5	2	2	3	2	3	5	5	3	4	3	5	7	4	4	5	6	5	5	4	6	7	5	5	5	2	2	3	2	3	5	5	3
MA-00073-423	MA-00073-423	4	4	4		1	4	4	4	0	0	0	0	0	2	0	0	0	0	0	0	1	1	1	1	1	0	1	1	0	0	0	0	0	0	0	0	0	2	0	0	0	0	0	0	1	1	1	1
MA-00073-432	MA-00073-432	2	2	2		1	2	2	2	2	2	2	2	2	1	2	2	2	2	2	2	2	2	2	2	2	1	2	1	2	2	2	2	2	2	2	2	2	1	2	2	2	2	2	2	2	2	2	2
MA-00073-433	MA-00073-433	7	7	5		1	7	7	5	7	7	7	7	7	7	7	6	7	7	6	5	5	6	7	6	6	6	7	6	7	6	7	7	7	7	7	7	7	7	7	6	7	7	6	5	5	6	7	6
MA-00073-434	MA-00073-434	24	24	24		1	24	24	24	17	17	18	18	18	22	18	20	19	19	20	21	15	16	17	18	18	20	17	19	18	17	19	18	17	17	18	18	18	22	18	20	19	19	20	21	15	16	17	18
MA-00073-435	MA-00073-435	9	9	9		1	9	9	9	4	3	2	1	2	3	1	3	3	3	1	5	2	3	2	2	4	4	6	4	3	2	2	2	4	3	2	1	2	3	1	3	3	3	1	5	2	3	2	2
MA-00073-442	MA-00073-442	3	3	3		1	3	3	3	0	1	0	0	1	0	2	1	0	0	0	0	0	0	0	0	0	0	0	0	0	0	1	0	0	1	0	0	1	0	2	1	0	0	0	0	0	0	0	0
MA-00073-444	MA-00073-444	9	9	9		1	9	9	9	7	8	6	8	8	8	7	9	5	6	5	6	5	5	7	2	5	6	6	9	7	6	8	8	7	8	6	8	8	8	7	9	5	6	5	6	5	5	7	2
MA-00073-445	MA-00073-445	3	3	3		1	3	3	3	2	1	1	1	1	1	2	1	1	0	2	0	0	0	0	0	0	0	0	0	1	1	1	0	2	1	1	1	1	1	2	1	1	0	2	0	0	0	0	0
MA-00073-451	MA-00073-451	5	1	1		1	5	1	1	5	5	4	4	4	4	5	4	3	4	4	5	3	5	4	4	3	4	5	5	4	3	4	5	1	1	0	0	0	0	1	0	0	1	1	1	0	1	0	1
MA-00073-452	MA-00073-452	3	3	2		1	3	3	2	2	1	2	1	2	2	2	1	1	0	1	0	1	0	3	1	1	1	1	2	1	1	2	3	2	1	2	1	2	2	2	1	1	0	1	0	1	0	3	1
MA-00073-453	MA-00073-453	2	2	2		1	2	2	2	1	1	0	1	2	0	2	0	2	2	2	2	0	0	0	0	0	0	0	0	0	0	1	1	1	1	0	1	2	0	2	0	2	2	2	2	0	0	0	0
MA-00073-455	MA-00073-455	2	2	2		1	2	2	2	1	0	0	0	0	0	1	0	0	0	0	1	0	1	1	1	0	0	0	0	0	0	0	0	1	0	0	0	0	0	1	0	0	0	0	1	0	1	1	1
MA-00073-460;MA-00210-144	MA-00073-460	4;1	4;1	4;1		2	4	4	4	4	3	2	2	1	2	2	2	3	2	2	1	1	1	2	1	2	3	3	2	2	2	1	2	4	3	2	2	1	2	2	2	3	2	2	1	1	1	2	1
MA-00073-461	MA-00073-461	25	2	2		1	25	2	2	24	25	22	24	24	24	25	23	23	21	23	23	20	23	25	21	23	22	24	25	22	23	24	24	1	2	1	2	2	2	2	2	1	1	1	1	0	2	2	1
MA-00073-463	MA-00073-463	8	8	8		1	8	8	8	3	4	2	2	3	3	2	2	0	2	1	2	3	6	4	4	4	4	3	3	2	4	3	3	3	4	2	2	3	3	2	2	0	2	1	2	3	6	4	4
MA-00073-465	MA-00073-465	3	3	3		1	3	3	3	2	2	3	3	3	3	3	2	2	3	2	2	2	3	2	2	3	3	2	3	2	2	3	2	2	2	3	3	3	3	3	2	2	3	2	2	2	3	2	2
MA-00073-470	MA-00073-470	5	5	5		1	5	5	5	4	4	5	4	4	4	4	4	4	4	4	4	2	3	3	4	4	5	3	4	4	3	4	4	4	4	5	4	4	4	4	4	4	4	4	4	2	3	3	4
MA-00073-471	MA-00073-471	3	3	3		1	3	3	3	1	0	0	1	0	0	0	0	0	0	0	0	1	1	0	0	1	1	1	1	1	2	1	0	1	0	0	1	0	0	0	0	0	0	0	0	1	1	0	0
MA-00073-474	MA-00073-474	2	2	2		1	2	2	2	0	0	0	0	0	0	0	0	1	0	1	0	0	1	1	0	0	0	0	0	0	0	0	0	0	0	0	0	0	0	0	0	1	0	1	0	0	1	1	0
MA-00073-476	MA-00073-476	8	8	8		1	8	8	8	5	5	3	5	7	6	7	5	5	4	6	5	5	7	5	6	5	6	5	6	7	7	7	7	5	5	3	5	7	6	7	5	5	4	6	5	5	7	5	6
MA-00073-478	MA-00073-478	8	8	8		1	8	8	8	4	4	3	3	2	2	2	2	2	2	1	0	1	1	2	2	2	2	3	3	3	3	2	2	4	4	3	3	2	2	2	2	2	2	1	0	1	1	2	2
MA-00073-48	MA-00073-48	6	6	6		1	6	6	6	2	1	2	2	1	1	4	2	1	0	4	1	3	5	4	5	3	5	5	4	5	3	3	5	2	1	2	2	1	1	4	2	1	0	4	1	3	5	4	5
MA-00073-480	MA-00073-480	10	5	5		1	10	5	5	9	8	8	7	8	8	8	7	6	6	7	7	9	10	9	9	9	8	8	9	10	10	9	10	5	3	4	4	5	5	5	4	3	3	4	4	5	5	5	5
MA-00073-487	MA-00073-487	7	7	5		1	7	7	5	4	3	3	4	5	3	2	3	2	2	1	1	0	1	1	1	2	1	1	0	3	3	3	3	4	3	3	4	5	3	2	3	2	2	1	1	0	1	1	1
MA-00073-490	MA-00073-490	7	2	2		1	7	2	2	3	1	0	0	1	1	1	1	1	1	2	1	1	4	2	2	2	1	2	1	0	0	2	1	0	0	0	0	0	0	1	0	0	0	1	0	0	2	0	0
MA-00073-492	MA-00073-492	20	9	9		1	20	9	9	13	17	15	15	15	17	15	11	16	14	15	14	15	12	16	16	14	12	14	14	15	13	13	14	5	7	6	7	7	8	6	3	7	6	7	6	5	3	7	5
MA-00073-493	MA-00073-493	17	17	10		1	17	17	10	8	11	10	11	9	9	11	11	10	8	7	5	16	15	14	11	13	12	14	12	11	10	12	11	8	11	10	11	9	9	11	11	10	8	7	5	16	15	14	11
MA-00073-495	MA-00073-495	5	5	5		1	5	5	5	5	5	5	5	5	5	5	5	5	5	5	5	1	2	3	2	3	2	4	2	5	4	3	5	5	5	5	5	5	5	5	5	5	5	5	5	1	2	3	2
MA-00073-498	MA-00073-498	3	2	2		1	3	2	2	0	0	2	1	1	0	0	1	0	0	0	0	1	2	1	2	2	2	2	1	1	2	1	2	0	0	1	0	0	0	0	0	0	0	0	0	0	1	0	1
MA-00073-505	MA-00073-505	9	9	9		1	9	9	9	1	1	0	1	3	2	3	1	0	0	2	1	3	6	6	4	5	6	6	5	3	0	3	3	1	1	0	1	3	2	3	1	0	0	2	1	3	6	6	4
MA-00073-506	MA-00073-506	3	3	3		1	3	3	3	1	0	0	2	1	0	0	0	0	0	1	1	0	0	0	0	0	0	0	0	1	1	0	1	1	0	0	2	1	0	0	0	0	0	1	1	0	0	0	0
MA-00073-513	MA-00073-513	5	5	5		1	5	5	5	0	0	0	1	0	1	1	1	1	0	0	1	4	3	3	2	4	4	3	4	1	3	3	2	0	0	0	1	0	1	1	1	1	0	0	1	4	3	3	2
MA-00073-514	MA-00073-514	7	7	7		1	7	7	7	3	5	4	4	5	3	5	5	4	5	4	4	4	4	4	5	4	5	6	3	3	6	4	4	3	5	4	4	5	3	5	5	4	5	4	4	4	4	4	5
MA-00073-517	MA-00073-517	11	11	11		1	11	11	11	9	7	6	7	8	6	8	8	8	6	7	7	6	8	9	5	6	7	9	8	7	8	9	10	9	7	6	7	8	6	8	8	8	6	7	7	6	8	9	5
MA-00073-520	MA-00073-520	2	2	2		1	2	2	2	1	1	1	1	1	1	1	1	0	1	0	1	1	1	0	0	1	0	0	1	1	2	1	1	1	1	1	1	1	1	1	1	0	1	0	1	1	1	0	0
MA-00073-522	MA-00073-522	4	4	4		1	4	4	4	2	3	2	3	3	3	3	3	4	4	3	3	3	3	2	1	4	3	4	3	4	3	3	3	2	3	2	3	3	3	3	3	4	4	3	3	3	3	2	1
MA-00073-523	MA-00073-523	2	2	2		1	2	2	2	1	0	0	1	0	0	0	0	0	0	0	0	1	0	0	0	0	0	1	0	0	1	2	1	1	0	0	1	0	0	0	0	0	0	0	0	1	0	0	0
MA-00073-524	MA-00073-524	2	2	2		1	2	2	2	2	2	0	1	2	2	2	0	2	2	2	1	0	0	0	0	0	0	0	0	2	1	2	2	2	2	0	1	2	2	2	0	2	2	2	1	0	0	0	0
MA-00210-129;MA-00073-527	MA-00210-129;MA-00073-527	8;8	8;8	8;8	;	2	8	8	8	7	7	7	7	6	8	7	7	8	7	8	7	7	8	8	7	8	8	8	8	8	7	7	8	7	7	7	7	6	8	7	7	8	7	8	7	7	8	8	7
MA-00073-528	MA-00073-528	14	14	7		1	14	14	7	10	11	12	11	12	12	11	11	11	10	10	11	11	12	13	12	13	14	12	13	11	12	13	13	10	11	12	11	12	12	11	11	11	10	10	11	11	12	13	12
MA-00073-529	MA-00073-529	6	6	6		1	6	6	6	4	5	4	4	5	5	4	5	4	4	5	4	2	4	4	4	3	4	3	6	4	3	3	5	4	5	4	4	5	5	4	5	4	4	5	4	2	4	4	4
MA-00073-533	MA-00073-533	1	1	1		1	1	1	1	1	0	0	0	0	0	0	0	0	0	0	0	1	1	1	1	1	1	0	1	0	0	0	1	1	0	0	0	0	0	0	0	0	0	0	0	1	1	1	1
MA-00073-536	MA-00073-536	2	2	2		1	2	2	2	1	0	0	0	0	1	1	0	0	1	0	0	1	1	0	0	0	0	0	0	1	0	0	1	1	0	0	0	0	1	1	0	0	1	0	0	1	1	0	0
MA-00073-538	MA-00073-538	22	22	22		1	22	22	22	19	20	18	18	20	20	19	19	17	15	17	19	16	22	22	19	19	19	21	22	18	18	20	20	19	20	18	18	20	20	19	19	17	15	17	19	16	22	22	19
MA-00073-539	MA-00073-539	2	2	2		1	2	2	2	2	2	1	1	1	0	1	1	1	0	0	0	0	1	0	1	1	0	0	1	2	1	1	2	2	2	1	1	1	0	1	1	1	0	0	0	0	1	0	1
MA-00073-541	MA-00073-541	3	3	3		1	3	3	3	1	0	0	1	1	1	1	0	2	1	3	1	0	0	0	0	1	2	1	1	1	0	1	0	1	0	0	1	1	1	1	0	2	1	3	1	0	0	0	0
MA-00073-545	MA-00073-545	7	7	7		1	7	7	7	3	3	4	4	3	5	4	4	2	2	1	2	2	3	3	5	4	5	4	2	2	2	5	3	3	3	4	4	3	5	4	4	2	2	1	2	2	3	3	5
MA-00073-547	MA-00073-547	1	1	1		1	1	1	1	0	0	0	0	0	0	0	0	0	0	0	0	0	0	0	1	1	1	1	0	0	0	1	0	0	0	0	0	0	0	0	0	0	0	0	0	0	0	0	1
MA-00073-551	MA-00073-551	2	2	2		1	2	2	2	2	2	2	2	2	2	2	1	2	2	2	2	2	2	2	2	2	2	2	2	2	2	2	2	2	2	2	2	2	2	2	1	2	2	2	2	2	2	2	2
MA-00073-552	MA-00073-552	7	6	6		1	7	6	6	5	5	4	5	6	5	4	6	3	4	4	4	2	3	3	1	3	4	4	3	5	4	5	7	4	4	3	4	5	4	3	5	3	3	4	3	2	2	2	1
MA-00073-554	MA-00073-554	3	3	3		1	3	3	3	1	1	0	1	0	0	1	1	0	0	1	0	0	0	0	0	0	0	0	0	1	0	2	2	1	1	0	1	0	0	1	1	0	0	1	0	0	0	0	0
MA-00073-559;MA-00210-38	MA-00073-559;MA-00210-38	5;5	5;5	5;5	;	2	5	5	5	3	2	4	3	4	4	4	3	2	2	3	2	4	3	3	4	2	4	2	3	3	4	3	3	3	2	4	3	4	4	4	3	2	2	3	2	4	3	3	4
MA-00073-562;MA-00213-643	MA-00073-562	45;3	45;3	33;1		2	45	45	33	42	40	43	41	40	43	42	43	41	41	41	42	43	42	42	44	43	42	43	45	41	43	44	44	42	40	43	41	40	43	42	43	41	41	41	42	43	42	42	44
MA-00073-568	MA-00073-568	6	6	6		1	6	6	6	3	4	2	3	3	3	4	3	2	0	3	1	2	4	3	3	3	2	4	2	3	3	3	3	3	4	2	3	3	3	4	3	2	0	3	1	2	4	3	3
MA-00073-569;MA-00073-367	MA-00073-569	9;2	9;2	9;2		2	9	9	9	4	4	3	6	7	3	5	5	5	3	5	2	4	6	5	5	3	6	7	5	3	4	4	4	4	4	3	6	7	3	5	5	5	3	5	2	4	6	5	5
MA-00073-570	MA-00073-570	41	41	17		1	41	41	17	30	29	28	29	32	27	30	29	27	25	29	29	29	32	35	32	31	29	33	35	30	31	29	29	30	29	28	29	32	27	30	29	27	25	29	29	29	32	35	32
MA-00073-574	MA-00073-574	1	1	1		1	1	1	1	1	1	0	0	1	1	0	1	1	0	0	0	0	0	0	0	1	0	0	1	1	1	0	1	1	1	0	0	1	1	0	1	1	0	0	0	0	0	0	0
MA-00073-576	MA-00073-576	2	2	2		1	2	2	2	0	1	1	0	1	1	0	0	0	0	1	1	0	1	1	0	0	0	1	1	0	0	0	0	0	1	1	0	1	1	0	0	0	0	1	1	0	1	1	0
MA-00073-578	MA-00073-578	2	1	1		1	2	1	1	2	2	2	1	2	2	2	2	1	2	1	2	1	0	1	1	0	0	0	0	0	0	0	0	1	1	1	0	1	1	1	1	0	1	0	1	1	0	0	0
MA-00073-579	MA-00073-579	7	7	7		1	7	7	7	5	5	5	6	5	7	6	6	5	7	5	6	0	1	2	1	4	3	3	4	5	6	6	6	5	5	5	6	5	7	6	6	5	7	5	6	0	1	2	1
MA-00073-58	MA-00073-58	3	3	3		1	3	3	3	1	0	2	1	0	1	0	1	1	1	1	1	3	1	2	3	3	2	2	3	0	1	1	1	1	0	2	1	0	1	0	1	1	1	1	1	3	1	2	3
MA-00073-587;MA-00067-314	MA-00073-587	10;1	10;1	10;1		2	10	10	10	5	7	4	5	4	4	3	6	4	4	2	4	8	7	8	5	6	4	5	7	4	5	7	6	5	7	4	5	4	4	3	6	4	4	2	4	8	7	8	5
MA-00073-590	MA-00073-590	5	3	3		1	5	3	3	4	4	3	3	3	4	2	2	4	3	4	3	4	4	4	4	3	2	4	3	5	4	4	4	2	2	1	1	1	2	0	0	2	1	2	1	2	2	2	2
MA-00073-593	MA-00073-593	4	4	4		1	4	4	4	4	4	3	3	3	2	4	3	4	2	4	3	3	4	4	4	4	3	4	3	4	4	3	4	4	4	3	3	3	2	4	3	4	2	4	3	3	4	4	4
MA-00073-594	MA-00073-594	5	5	5		1	5	5	5	2	1	0	2	1	2	1	2	1	1	0	2	2	3	3	3	3	3	3	5	2	2	3	3	2	1	0	2	1	2	1	2	1	1	0	2	2	3	3	3
MA-00073-598	MA-00073-598	1	1	1		1	1	1	1	0	0	0	1	0	0	0	0	0	0	0	0	1	1	1	1	1	1	0	1	1	0	0	1	0	0	0	1	0	0	0	0	0	0	0	0	1	1	1	1
MA-00073-600	MA-00073-600	1	1	1		1	1	1	1	1	1	0	0	1	0	1	0	1	1	1	1	0	0	1	0	0	0	0	1	0	0	1	0	1	1	0	0	1	0	1	0	1	1	1	1	0	0	1	0
MA-00073-602	MA-00073-602	41	41	41		1	41	41	41	9	9	7	8	16	9	12	11	15	14	16	12	17	20	18	15	16	14	18	25	12	10	17	8	9	9	7	8	16	9	12	11	15	14	16	12	17	20	18	15
MA-00073-603	MA-00073-603	1	1	1		1	1	1	1	0	0	0	0	0	0	0	1	0	0	0	0	0	0	0	0	1	1	1	1	1	0	0	1	0	0	0	0	0	0	0	1	0	0	0	0	0	0	0	0
MA-00073-604	MA-00073-604	2	2	2		1	2	2	2	1	1	0	0	1	1	1	1	0	1	1	1	0	0	1	1	0	0	0	0	1	1	0	2	1	1	0	0	1	1	1	1	0	1	1	1	0	0	1	1
MA-00073-611	MA-00073-611	20	20	6		1	20	20	6	15	14	16	17	16	15	13	15	13	13	13	15	16	16	15	15	17	17	17	18	17	17	15	15	15	14	16	17	16	15	13	15	13	13	13	15	16	16	15	15
MA-00073-612	MA-00073-612	5	5	5		1	5	5	5	2	2	2	3	2	2	2	2	3	2	1	2	0	3	2	2	3	3	2	2	4	3	2	3	2	2	2	3	2	2	2	2	3	2	1	2	0	3	2	2
MA-00073-615	MA-00073-615	7	7	7		1	7	7	7	6	6	4	6	6	6	5	5	5	6	4	6	3	5	6	5	5	6	5	6	5	6	5	4	6	6	4	6	6	6	5	5	5	6	4	6	3	5	6	5
MA-00073-616	MA-00073-616	1	1	1		1	1	1	1	1	1	0	0	1	0	0	0	0	1	1	1	1	0	0	1	1	0	0	0	0	1	0	0	1	1	0	0	1	0	0	0	0	1	1	1	1	0	0	1
MA-00073-618	MA-00073-618	14	14	14		1	14	14	14	9	10	9	9	11	10	8	10	8	7	10	11	12	14	13	9	11	11	10	12	8	9	11	10	9	10	9	9	11	10	8	10	8	7	10	11	12	14	13	9
MA-00073-62	MA-00073-62	16	16	16		1	16	16	16	8	9	7	8	8	7	7	5	5	5	4	5	9	13	10	9	11	11	11	13	10	11	9	10	8	9	7	8	8	7	7	5	5	5	4	5	9	13	10	9
MA-00073-621	MA-00073-621	15	15	15		1	15	15	15	2	2	3	1	1	0	1	3	1	2	3	1	10	14	12	12	7	11	10	9	5	3	4	1	2	2	3	1	1	0	1	3	1	2	3	1	10	14	12	12
MA-00073-623	MA-00073-623	2	2	2		1	2	2	2	1	1	1	1	0	1	1	2	1	1	1	1	0	2	1	1	0	1	2	2	1	1	1	1	1	1	1	1	0	1	1	2	1	1	1	1	0	2	1	1
MA-00073-63	MA-00073-63	10	10	10		1	10	10	10	7	7	4	5	7	5	7	7	8	5	7	7	3	1	2	2	1	4	3	4	6	4	7	7	7	7	4	5	7	5	7	7	8	5	7	7	3	1	2	2
MA-00073-636	MA-00073-636	6	6	6		1	6	6	6	3	3	4	1	3	2	4	3	3	1	1	2	1	2	3	2	3	2	3	2	3	2	4	3	3	3	4	1	3	2	4	3	3	1	1	2	1	2	3	2
MA-00073-638	MA-00073-638	3	3	3		1	3	3	3	2	1	1	2	1	1	1	2	1	1	2	2	1	1	1	1	1	1	3	1	1	1	1	1	2	1	1	2	1	1	1	2	1	1	2	2	1	1	1	1
MA-00073-639	MA-00073-639	10	3	3		1	10	3	3	6	5	7	8	8	7	8	7	7	8	9	7	8	8	7	7	7	8	5	7	7	7	6	6	2	2	3	3	2	2	2	2	2	2	3	2	2	2	2	2
MA-00073-64	MA-00073-64	15	15	15		1	15	15	15	13	13	11	13	13	13	14	12	12	11	12	13	7	8	8	9	8	10	9	12	11	10	13	13	13	13	11	13	13	13	14	12	12	11	12	13	7	8	8	9
MA-00073-641	MA-00073-641	12	12	12		1	12	12	12	10	9	8	9	8	9	7	10	9	9	8	9	10	11	12	11	12	12	11	9	8	9	8	9	10	9	8	9	8	9	7	10	9	9	8	9	10	11	12	11
MA-00073-643	MA-00073-643	1	1	1		1	1	1	1	0	0	1	0	0	1	0	0	0	1	0	0	0	0	0	0	0	0	0	0	0	1	0	0	0	0	1	0	0	1	0	0	0	1	0	0	0	0	0	0
MA-00073-646	MA-00073-646	16	12	12		1	16	12	12	14	15	15	16	15	16	16	15	13	13	14	14	12	13	14	11	15	15	14	15	14	14	16	16	10	11	12	12	11	12	12	11	9	9	10	10	8	9	10	8
MA-00073-648	MA-00073-648	4	4	3		1	4	4	3	2	1	1	2	2	2	2	2	1	1	1	2	1	3	3	1	3	3	1	3	1	2	3	2	2	1	1	2	2	2	2	2	1	1	1	2	1	3	3	1
MA-00073-649	MA-00073-649	4	2	2		1	4	2	2	3	3	3	4	4	4	3	2	3	3	2	3	2	2	4	3	4	3	3	3	3	4	3	3	1	1	1	2	2	2	1	0	1	1	0	2	0	0	2	1
MA-00073-658;MA-00210-243	MA-00073-658;MA-00210-243	7;5	4;2	4;2	;	2	7	4	4	3	3	2	3	3	3	2	2	2	2	2	3	3	6	4	4	2	3	2	4	3	2	3	2	0	0	0	0	0	0	0	0	0	0	0	0	1	3	1	1
MA-00210-249;MA-00073-659	MA-00210-249;MA-00073-659	6;6	6;6	6;6	;	2	6	6	6	3	2	2	4	4	6	5	1	4	4	4	5	0	3	4	2	1	4	4	4	2	1	3	0	3	2	2	4	4	6	5	1	4	4	4	5	0	3	4	2
MA-00073-660	MA-00073-660	23	23	23		1	23	23	23	15	13	12	11	13	15	11	13	8	9	13	11	14	16	17	13	15	18	13	21	10	13	14	16	15	13	12	11	13	15	11	13	8	9	13	11	14	16	17	13
MA-00073-662	MA-00073-662	1	1	1		1	1	1	1	1	1	0	1	1	0	0	0	1	1	0	0	1	0	1	0	0	1	0	0	0	1	1	1	1	1	0	1	1	0	0	0	1	1	0	0	1	0	1	0
MA-00073-664;MA-00210-263	MA-00073-664	6;2	6;2	6;2		2	6	6	6	5	5	3	3	4	4	3	5	4	4	4	4	2	2	3	2	4	4	3	2	3	3	3	4	5	5	3	3	4	4	3	5	4	4	4	4	2	2	3	2
MA-00073-665	MA-00073-665	8	8	8		1	8	8	8	2	1	3	0	1	1	3	3	3	3	3	3	3	1	4	2	3	3	1	2	2	2	3	3	2	1	3	0	1	1	3	3	3	3	3	3	3	1	4	2
MA-00073-670;MA-00210-276	MA-00073-670;MA-00210-276	7;7	7;7	7;7	;	2	7	7	7	1	0	0	0	5	6	7	1	3	3	3	3	1	2	3	1	0	0	2	1	0	0	1	1	1	0	0	0	5	6	7	1	3	3	3	3	1	2	3	1
MA-00073-671	MA-00073-671	12	12	12		1	12	12	12	10	10	11	9	12	9	10	10	11	10	11	11	9	10	9	9	10	9	10	9	9	11	10	9	10	10	11	9	12	9	10	10	11	10	11	11	9	10	9	9
MA-00073-672;MA-00072-348	MA-00073-672	16;1	16;1	15;0		2	16	16	15	9	9	7	9	9	10	7	9	7	4	11	8	10	9	8	12	10	9	6	8	7	9	9	6	9	9	7	9	9	10	7	9	7	4	11	8	10	9	8	12
MA-00073-673	MA-00073-673	1	1	1		1	1	1	1	0	0	0	0	0	0	0	0	0	0	0	0	1	0	0	0	0	0	0	0	0	0	0	0	0	0	0	0	0	0	0	0	0	0	0	0	1	0	0	0
MA-00073-677	MA-00073-677	6	6	6		1	6	6	6	3	3	2	3	3	5	2	3	3	2	5	2	1	4	2	4	3	4	3	2	4	2	2	2	3	3	2	3	3	5	2	3	3	2	5	2	1	4	2	4
MA-00073-678	MA-00073-678	13	13	13		1	13	13	13	6	6	3	6	4	6	6	7	5	5	3	8	7	7	4	4	4	4	4	5	10	9	6	5	6	6	3	6	4	6	6	7	5	5	3	8	7	7	4	4
MA-00073-68	MA-00073-68	2	2	2		1	2	2	2	0	1	1	0	1	1	2	0	1	1	1	2	0	0	0	0	1	1	0	1	1	1	1	0	0	1	1	0	1	1	2	0	1	1	1	2	0	0	0	0
MA-00073-681	MA-00073-681	1	1	1		1	1	1	1	0	0	0	0	0	0	0	0	0	0	0	0	0	0	0	0	0	0	0	0	0	0	0	1	0	0	0	0	0	0	0	0	0	0	0	0	0	0	0	0
MA-00073-688	MA-00073-688	6	6	6		1	6	6	6	4	4	3	4	4	4	4	3	3	4	4	4	3	2	4	3	4	3	3	3	3	5	4	4	4	4	3	4	4	4	4	3	3	4	4	4	3	2	4	3
MA-00073-69	MA-00073-69	4	4	4		1	4	4	4	0	0	0	0	0	0	0	0	0	0	0	0	2	2	3	1	3	2	0	1	0	0	0	0	0	0	0	0	0	0	0	0	0	0	0	0	2	2	3	1
MA-00073-690	MA-00073-690	2	2	2		1	2	2	2	0	1	1	1	1	1	0	1	1	1	1	0	2	0	1	0	1	1	1	1	0	1	1	1	0	1	1	1	1	1	0	1	1	1	1	0	2	0	1	0
MA-00073-692	MA-00073-692	22	22	22		1	22	22	22	8	9	8	13	16	14	14	10	15	15	11	15	19	19	16	18	16	16	16	19	10	6	10	10	8	9	8	13	16	14	14	10	15	15	11	15	19	19	16	18
MA-00073-70	MA-00073-70	3	3	3		1	3	3	3	1	0	1	1	0	0	1	1	1	1	2	2	1	1	2	2	2	1	1	2	1	1	1	1	1	0	1	1	0	0	1	1	1	1	2	2	1	1	2	2
MA-00073-71	MA-00073-71	2	2	2		1	2	2	2	0	0	0	0	0	0	0	0	0	0	0	0	1	0	2	0	0	0	0	2	0	0	0	0	0	0	0	0	0	0	0	0	0	0	0	0	1	0	2	0
MA-00073-72	MA-00073-72	3	3	3		1	3	3	3	1	1	1	1	1	1	1	1	1	0	1	1	2	1	2	2	2	1	1	0	1	1	2	1	1	1	1	1	1	1	1	1	1	0	1	1	2	1	2	2
MA-00073-73	MA-00073-73	5	5	5		1	5	5	5	2	1	2	2	3	2	2	4	0	0	0	1	1	4	3	0	2	2	2	3	1	0	2	3	2	1	2	2	3	2	2	4	0	0	0	1	1	4	3	0
MA-00073-76	MA-00073-76	24	24	22		1	24	24	22	17	15	16	15	16	15	14	15	20	19	20	18	14	14	15	12	11	12	12	8	18	14	18	15	17	15	16	15	16	15	14	15	20	19	20	18	14	14	15	12
MA-00073-77	MA-00073-77	27	27	26		1	27	27	26	16	14	20	17	20	19	17	15	20	20	24	22	15	18	17	14	18	19	17	18	17	18	15	18	16	14	20	17	20	19	17	15	20	20	24	22	15	18	17	14
MA-00073-78	MA-00073-78	2	1	1		1	2	1	1	0	0	0	0	0	0	1	0	0	0	0	0	1	1	1	1	1	1	1	1	0	2	0	0	0	0	0	0	0	0	1	0	0	0	0	0	1	1	1	1
MA-00073-79	MA-00073-79	2	2	2		1	2	2	2	1	2	1	1	2	1	1	1	1	1	1	1	2	1	2	1	1	2	1	2	1	2	1	1	1	2	1	1	2	1	1	1	1	1	1	1	2	1	2	1
MA-00073-8	MA-00073-8	2	2	2		1	2	2	2	1	1	2	2	1	2	1	0	1	0	1	0	0	1	2	0	0	1	2	0	1	1	1	2	1	1	2	2	1	2	1	0	1	0	1	0	0	1	2	0
MA-00073-82	MA-00073-82	9	9	9		1	9	9	9	7	5	6	6	7	8	6	5	8	6	7	7	6	6	8	6	7	5	5	5	6	6	6	7	7	5	6	6	7	8	6	5	8	6	7	7	6	6	8	6
MA-00073-83	MA-00073-83	5	5	5		1	5	5	5	3	4	2	3	4	2	4	4	3	3	4	3	5	5	4	4	4	4	4	5	4	3	3	3	3	4	2	3	4	2	4	4	3	3	4	3	5	5	4	4
MA-00073-85	MA-00073-85	8	8	8		1	8	8	8	6	5	5	5	6	5	5	6	6	5	5	5	7	5	5	5	6	6	5	7	5	6	6	5	6	5	5	5	6	5	5	6	6	5	5	5	7	5	5	5
MA-00073-86	MA-00073-86	5	5	5		1	5	5	5	4	5	4	4	3	5	4	5	4	4	3	5	4	5	4	4	4	3	4	5	4	4	5	5	4	5	4	4	3	5	4	5	4	4	3	5	4	5	4	4
MA-00073-92	MA-00073-92	7	7	7		1	7	7	7	5	5	6	5	5	4	5	5	5	5	5	5	7	6	6	6	6	5	5	5	6	6	5	6	5	5	6	5	5	4	5	5	5	5	5	5	7	6	6	6
MA-00073-95	MA-00073-95	12	11	11		1	12	11	11	9	10	8	11	10	11	10	10	7	8	7	9	8	9	9	7	10	9	9	11	11	8	9	9	8	9	7	10	9	10	9	9	6	7	6	8	7	8	8	6
MA-00073-97	MA-00073-97	1	1	1		1	1	1	1	1	1	1	1	1	1	1	0	1	1	1	0	1	1	1	1	1	1	1	1	1	1	1	1	1	1	1	1	1	1	1	0	1	1	1	0	1	1	1	1
MA-00074-2	MA-00074-2	1	1	1		1	1	1	1	1	1	1	1	1	1	1	1	1	1	1	0	1	0	1	1	0	1	1	1	1	1	1	1	1	1	1	1	1	1	1	1	1	1	1	0	1	0	1	1
MA-00075-1	MA-00075-1	1	1	1		1	1	1	1	1	1	1	1	1	1	1	1	1	1	1	1	1	1	1	1	1	1	1	1	1	1	1	1	1	1	1	1	1	1	1	1	1	1	1	1	1	1	1	1
MA-00082-1	MA-00082-1	1	1	1		1	1	1	1	1	0	0	0	0	0	0	0	0	0	0	0	1	0	0	0	0	0	0	0	0	1	0	0	1	0	0	0	0	0	0	0	0	0	0	0	1	0	0	0
MA-00090-100;MA-00297-192	MA-00090-100;MA-00297-192	1;1	1;1	1;1	;	2	1	1	1	1	1	0	1	0	1	1	1	1	0	1	0	0	1	1	0	1	1	1	1	1	0	0	0	1	1	0	1	0	1	1	1	1	0	1	0	0	1	1	0
MA-00090-101	MA-00090-101	2	2	2		1	2	2	2	0	0	0	0	0	0	0	0	0	0	0	0	0	0	0	0	1	0	1	2	0	1	0	0	0	0	0	0	0	0	0	0	0	0	0	0	0	0	0	0
MA-00090-104	MA-00090-104	6	6	6		1	6	6	6	2	2	2	2	2	2	2	1	3	2	1	3	2	1	1	2	1	1	1	1	0	2	1	1	2	2	2	2	2	2	2	1	3	2	1	3	2	1	1	2
MA-00090-109	MA-00090-109	5	5	5		1	5	5	5	1	0	0	2	1	0	1	0	1	0	0	0	2	3	4	3	0	2	1	0	0	1	1	0	1	0	0	2	1	0	1	0	1	0	0	0	2	3	4	3
MA-00090-112	MA-00090-112	1	1	1		1	1	1	1	0	1	0	1	0	0	0	0	0	0	1	0	0	0	0	0	1	0	1	1	1	1	1	1	0	1	0	1	0	0	0	0	0	0	1	0	0	0	0	0
MA-00090-12	MA-00090-12	21	21	20		1	21	21	20	12	15	14	14	16	16	17	16	14	14	12	13	11	14	15	11	13	18	14	14	16	15	15	17	12	15	14	14	16	16	17	16	14	14	12	13	11	14	15	11
MA-00090-122	MA-00090-122	3	3	3		1	3	3	3	2	2	1	1	2	2	2	2	1	1	1	1	1	2	2	1	1	1	2	2	1	1	2	2	2	2	1	1	2	2	2	2	1	1	1	1	1	2	2	1
MA-00090-13	MA-00090-13	12	12	12		1	12	12	12	8	9	6	9	9	9	8	9	9	10	7	8	3	5	5	5	6	7	6	5	7	6	7	5	8	9	6	9	9	9	8	9	9	10	7	8	3	5	5	5
MA-00090-131	MA-00090-131	5	5	5		1	5	5	5	1	1	2	1	2	1	1	3	2	1	2	1	1	2	2	1	1	2	2	1	2	2	2	1	1	1	2	1	2	1	1	3	2	1	2	1	1	2	2	1
MA-00090-132	MA-00090-132	59	59	59		1	59	59	59	22	24	23	22	24	24	24	30	18	25	23	23	35	39	39	27	34	27	40	34	29	30	29	28	22	24	23	22	24	24	24	30	18	25	23	23	35	39	39	27
MA-00090-134	MA-00090-134	2	2	2		1	2	2	2	1	1	0	1	1	1	1	1	2	1	1	1	0	1	0	1	1	1	1	1	0	1	0	1	1	1	0	1	1	1	1	1	2	1	1	1	0	1	0	1
MA-00090-140	MA-00090-140	4	4	4		1	4	4	4	3	4	1	2	2	3	4	1	2	3	4	4	2	0	2	1	2	2	1	1	2	1	2	2	3	4	1	2	2	3	4	1	2	3	4	4	2	0	2	1
MA-00090-142	MA-00090-142	1	1	1		1	1	1	1	1	0	1	0	0	1	0	1	0	1	0	0	1	0	0	0	1	1	1	0	1	0	1	0	1	0	1	0	0	1	0	1	0	1	0	0	1	0	0	0
MA-00090-146	MA-00090-146	3	3	3		1	3	3	3	1	2	0	2	0	0	0	0	0	0	0	0	1	1	0	1	2	1	0	0	1	1	1	1	1	2	0	2	0	0	0	0	0	0	0	0	1	1	0	1
MA-00090-148	MA-00090-148	2	2	2		1	2	2	2	2	1	2	2	2	2	2	2	2	2	2	2	2	2	2	2	2	2	2	2	2	2	2	2	2	1	2	2	2	2	2	2	2	2	2	2	2	2	2	2
MA-00090-15	MA-00090-15	1	1	1		1	1	1	1	0	1	1	0	0	1	0	0	0	0	1	0	1	1	1	1	0	1	1	1	1	0	1	1	0	1	1	0	0	1	0	0	0	0	1	0	1	1	1	1
MA-00090-154;MA-00297-211	MA-00090-154;MA-00297-211	7;6	7;6	7;6	;	2	7	7	7	4	4	5	3	4	6	5	3	4	3	4	5	3	5	2	2	4	5	4	3	2	3	3	3	4	4	5	3	4	6	5	3	4	3	4	5	3	5	2	2
MA-00090-157	MA-00090-157	2	2	2		1	2	2	2	1	1	2	1	2	1	1	1	2	2	1	2	2	1	2	2	1	2	1	2	2	2	1	1	1	1	2	1	2	1	1	1	2	2	1	2	2	1	2	2
MA-00090-158	MA-00090-158	2	2	2		1	2	2	2	0	0	0	0	0	0	0	0	0	0	0	0	1	1	2	2	1	1	1	1	0	0	0	0	0	0	0	0	0	0	0	0	0	0	0	0	1	1	2	2
MA-00090-159;MA-00297-212	MA-00090-159;MA-00297-212	1;1	1;1	1;1	;	2	1	1	1	0	0	0	0	0	1	1	0	0	0	0	1	0	0	0	0	1	1	0	1	0	0	0	0	0	0	0	0	0	1	1	0	0	0	0	1	0	0	0	0
MA-00090-160	MA-00090-160	40	40	40		1	40	40	40	35	35	35	30	37	35	33	34	35	35	35	33	24	26	26	24	29	26	27	34	32	32	35	33	35	35	35	30	37	35	33	34	35	35	35	33	24	26	26	24
MA-00090-161	MA-00090-161	15	15	15		1	15	15	15	10	12	12	10	12	12	14	13	10	10	10	12	12	11	11	12	12	11	13	14	10	10	13	11	10	12	12	10	12	12	14	13	10	10	10	12	12	11	11	12
MA-00090-165	MA-00090-165	2	2	2		1	2	2	2	1	0	0	0	0	0	0	0	0	0	0	0	0	0	0	0	0	0	1	0	0	0	0	0	1	0	0	0	0	0	0	0	0	0	0	0	0	0	0	0
MA-00090-166	MA-00090-166	9	5	5		1	9	5	5	4	5	2	4	3	2	3	3	3	2	3	3	3	5	4	3	3	2	2	5	2	4	7	2	2	3	2	3	2	0	2	2	2	2	2	2	2	1	1	1
MA-00090-169	MA-00090-169	19	19	14		1	19	19	14	15	19	15	15	14	16	13	15	12	11	12	11	13	14	12	10	15	13	13	15	14	14	16	16	15	19	15	15	14	16	13	15	12	11	12	11	13	14	12	10
MA-00090-17	MA-00090-17	33	23	23		1	33	23	23	27	26	24	23	22	20	22	19	19	17	19	16	31	31	32	28	31	31	29	30	28	30	28	31	18	17	15	13	12	12	14	10	9	8	9	8	22	22	22	20
MA-00090-170	MA-00090-170	5	5	5		1	5	5	5	1	2	1	3	3	2	0	2	2	2	1	0	2	2	2	3	2	2	3	1	1	4	0	2	1	2	1	3	3	2	0	2	2	2	1	0	2	2	2	3
MA-00090-175	MA-00090-175	5	5	5		1	5	5	5	5	3	3	5	4	4	4	4	4	4	4	4	4	5	4	4	4	2	3	4	4	3	1	5	5	3	3	5	4	4	4	4	4	4	4	4	4	5	4	4
MA-00090-181	MA-00090-181	37	37	37		1	37	37	37	28	30	30	28	29	27	28	30	27	23	24	28	8	8	7	4	11	9	12	16	23	20	23	22	28	30	30	28	29	27	28	30	27	23	24	28	8	8	7	4
MA-00090-186	MA-00090-186	4	4	4		1	4	4	4	1	1	1	0	1	1	1	1	0	1	1	0	4	2	2	1	2	2	1	2	1	1	1	1	1	1	1	0	1	1	1	1	0	1	1	0	4	2	2	1
MA-00090-187	MA-00090-187	7	7	3		1	7	7	3	3	3	4	3	4	3	4	3	2	1	3	3	6	6	4	4	3	5	3	5	3	3	3	3	3	3	4	3	4	3	4	3	2	1	3	3	6	6	4	4
MA-00111-73;MA-00090-188	MA-00111-73;MA-00090-188	12;12	12;12	5;5	;	2	12	12	5	11	12	12	11	11	11	12	12	11	11	11	10	12	12	12	12	12	12	12	12	12	12	11	12	11	12	12	11	11	11	12	12	11	11	11	10	12	12	12	12
MA-00090-189	MA-00090-189	21	11	11		1	21	11	11	15	15	14	18	15	14	15	17	14	15	15	14	9	9	9	10	10	10	10	11	13	13	12	13	7	8	7	9	7	7	8	9	6	7	7	6	2	2	2	3
MA-00090-192	MA-00090-192	12	12	12		1	12	12	12	6	4	3	2	4	5	3	4	2	1	1	1	2	4	5	4	5	4	5	4	7	6	5	5	6	4	3	2	4	5	3	4	2	1	1	1	2	4	5	4
MA-00090-193	MA-00090-193	2	2	2		1	2	2	2	0	1	0	2	1	0	1	1	1	2	1	0	1	2	2	2	1	2	1	1	1	2	2	2	0	1	0	2	1	0	1	1	1	2	1	0	1	2	2	2
MA-00090-194	MA-00090-194	4	4	4		1	4	4	4	2	2	2	2	1	3	3	2	4	2	3	2	0	0	0	1	1	0	0	0	1	1	2	1	2	2	2	2	1	3	3	2	4	2	3	2	0	0	0	1
MA-00090-195	MA-00090-195	9	9	9		1	9	9	9	8	5	6	6	5	5	6	4	6	5	5	3	5	5	5	9	5	6	6	7	6	3	7	9	8	5	6	6	5	5	6	4	6	5	5	3	5	5	5	9
MA-00090-200	MA-00090-200	4	4	4		1	4	4	4	3	2	1	2	2	3	2	1	2	1	1	2	1	1	1	1	0	2	1	1	2	2	1	2	3	2	1	2	2	3	2	1	2	1	1	2	1	1	1	1
MA-00090-202	MA-00090-202	2	2	2		1	2	2	2	1	1	1	2	1	1	1	1	1	1	1	1	1	1	1	1	1	1	1	1	1	2	1	1	1	1	1	2	1	1	1	1	1	1	1	1	1	1	1	1
MA-00090-205	MA-00090-205	1	1	1		1	1	1	1	0	0	0	0	1	0	0	0	0	1	0	0	0	0	0	1	0	0	0	0	0	0	0	0	0	0	0	0	1	0	0	0	0	1	0	0	0	0	0	1
MA-00090-212	MA-00090-212	42	42	22		1	42	42	22	27	28	27	27	30	27	30	28	29	26	28	32	29	35	33	26	31	26	33	35	30	32	30	29	27	28	27	27	30	27	30	28	29	26	28	32	29	35	33	26
MA-00090-213	MA-00090-213	52	52	37		1	52	52	37	34	36	33	32	37	38	37	36	36	34	35	36	37	40	40	39	39	38	39	38	38	35	39	40	34	36	33	32	37	38	37	36	36	34	35	36	37	40	40	39
MA-00090-214	MA-00090-214	6	6	6		1	6	6	6	4	4	2	3	3	1	3	3	0	2	4	3	3	5	4	1	4	3	3	3	3	3	3	3	4	4	2	3	3	1	3	3	0	2	4	3	3	5	4	1
MA-00090-218	MA-00090-218	4	4	4		1	4	4	4	0	2	1	0	2	1	1	3	2	1	3	4	3	2	2	1	2	3	2	2	2	2	3	0	0	2	1	0	2	1	1	3	2	1	3	4	3	2	2	1
MA-00090-219	MA-00090-219	29	25	25		1	29	25	25	24	22	22	23	24	23	21	24	21	17	19	21	14	16	17	15	20	19	20	24	20	19	22	24	21	20	19	20	21	21	18	21	19	15	17	19	11	14	14	11
MA-00090-220	MA-00090-220	4	4	4		1	4	4	4	1	1	2	3	2	2	3	1	0	1	1	0	1	2	1	2	2	3	1	2	3	2	1	3	1	1	2	3	2	2	3	1	0	1	1	0	1	2	1	2
MA-00090-221	MA-00090-221	20	20	20		1	20	20	20	13	12	9	8	8	12	7	7	7	8	6	6	9	8	5	7	9	7	8	8	11	6	8	10	13	12	9	8	8	12	7	7	7	8	6	6	9	8	5	7
MA-00090-227	MA-00090-227	24	24	24		1	24	24	24	21	19	20	21	21	22	19	20	18	17	18	19	21	22	23	20	22	21	22	22	20	19	20	22	21	19	20	21	21	22	19	20	18	17	18	19	21	22	23	20
MA-00090-229	MA-00090-229	4	4	4		1	4	4	4	3	3	2	2	4	3	3	3	2	2	2	2	1	1	0	0	3	2	4	1	3	4	3	4	3	3	2	2	4	3	3	3	2	2	2	2	1	1	0	0
MA-00090-23	MA-00090-23	22	22	22		1	22	22	22	14	17	16	15	16	15	18	20	16	16	12	18	18	16	16	15	16	19	20	19	16	16	17	16	14	17	16	15	16	15	18	20	16	16	12	18	18	16	16	15
MA-00090-231	MA-00090-231	3	3	3		1	3	3	3	2	2	2	3	2	3	2	2	1	1	1	0	0	1	1	0	0	0	2	1	0	0	0	1	2	2	2	3	2	3	2	2	1	1	1	0	0	1	1	0
MA-00090-232	MA-00090-232	1	1	1		1	1	1	1	0	0	0	0	1	1	1	1	1	1	1	1	0	0	0	1	0	0	0	0	0	0	0	0	0	0	0	0	1	1	1	1	1	1	1	1	0	0	0	1
MA-00090-236	MA-00090-236	27	22	12		1	27	22	12	24	24	23	24	25	24	24	25	23	24	25	23	25	24	26	25	24	25	25	25	22	25	25	24	19	20	18	19	20	19	20	20	18	19	20	18	21	19	21	20
MA-00090-238	MA-00090-238	2	2	2		1	2	2	2	1	0	1	1	1	0	1	0	1	1	1	2	1	0	1	2	1	0	1	0	0	1	1	0	1	0	1	1	1	0	1	0	1	1	1	2	1	0	1	2
MA-00090-243	MA-00090-243	4	4	4		1	4	4	4	1	1	1	1	2	1	2	1	1	1	0	1	2	1	4	2	2	2	2	0	1	2	2	2	1	1	1	1	2	1	2	1	1	1	0	1	2	1	4	2
MA-00090-247	MA-00090-247	2	2	2		1	2	2	2	0	1	0	0	0	1	0	0	0	1	0	1	0	0	1	0	1	0	0	0	1	0	0	0	0	1	0	0	0	1	0	0	0	1	0	1	0	0	1	0
MA-00090-249	MA-00090-249	9	9	9		1	9	9	9	4	3	4	3	6	5	4	4	7	5	8	4	1	1	1	2	1	1	1	1	4	5	2	4	4	3	4	3	6	5	4	4	7	5	8	4	1	1	1	2
MA-00090-25	MA-00090-25	19	19	19		1	19	19	19	14	13	15	16	14	14	15	16	14	14	12	15	15	16	17	14	15	16	14	13	15	15	16	15	14	13	15	16	14	14	15	16	14	14	12	15	15	16	17	14
MA-00090-251	MA-00090-251	9	9	9		1	9	9	9	2	6	4	6	5	5	6	4	7	6	7	7	2	2	1	2	1	3	3	3	4	5	2	3	2	6	4	6	5	5	6	4	7	6	7	7	2	2	1	2
MA-00090-252	MA-00090-252	37	37	37		1	37	37	37	25	21	21	24	25	26	27	25	28	23	27	28	1	3	5	2	2	6	5	5	22	20	24	22	25	21	21	24	25	26	27	25	28	23	27	28	1	3	5	2
MA-00090-253	MA-00090-253	49	49	49		1	49	49	49	34	36	34	34	36	40	34	40	35	33	34	37	30	38	39	34	34	37	36	41	33	36	40	37	34	36	34	34	36	40	34	40	35	33	34	37	30	38	39	34
MA-00090-255	MA-00090-255	7	7	7		1	7	7	7	5	4	3	5	6	4	4	4	4	4	5	4	3	4	5	3	5	5	3	5	5	5	5	6	5	4	3	5	6	4	4	4	4	4	5	4	3	4	5	3
MA-00090-256	MA-00090-256	14	14	14		1	14	14	14	13	12	12	12	12	12	13	12	12	12	11	12	8	9	9	5	7	10	9	11	11	10	13	11	13	12	12	12	12	12	13	12	12	12	11	12	8	9	9	5
MA-00090-258	MA-00090-258	8	8	8		1	8	8	8	6	4	4	4	6	7	7	5	4	5	5	5	0	0	0	1	1	2	2	2	6	5	6	3	6	4	4	4	6	7	7	5	4	5	5	5	0	0	0	1
MA-00090-259	MA-00090-259	5	5	5		1	5	5	5	2	3	2	3	3	3	3	2	2	4	4	3	0	1	1	1	2	2	2	1	2	3	4	2	2	3	2	3	3	3	3	2	2	4	4	3	0	1	1	1
MA-00090-260	MA-00090-260	16	14	14		1	16	14	14	9	9	7	10	7	12	10	9	7	7	5	8	6	12	10	8	6	9	10	8	8	8	10	9	8	8	6	9	6	10	9	8	6	6	4	6	5	11	9	7
MA-00090-261	MA-00090-261	3	3	3		1	3	3	3	2	2	0	1	1	1	1	0	1	1	0	2	0	3	3	2	1	2	3	2	2	1	1	3	2	2	0	1	1	1	1	0	1	1	0	2	0	3	3	2
MA-00090-269	MA-00090-269	2	2	2		1	2	2	2	0	0	0	1	1	1	1	1	1	1	0	1	1	0	0	0	0	0	1	1	0	1	0	0	0	0	0	1	1	1	1	1	1	1	0	1	1	0	0	0
MA-00090-270	MA-00090-270	5	3	3		1	5	3	3	3	2	3	3	4	2	3	2	2	2	1	1	2	2	3	3	2	3	2	4	4	3	3	2	2	0	1	1	2	1	1	1	1	1	0	1	0	1	1	1
MA-00090-271	MA-00090-271	5	5	5		1	5	5	5	2	1	1	2	2	2	2	1	2	1	1	1	3	2	1	3	2	2	1	4	2	1	2	3	2	1	1	2	2	2	2	1	2	1	1	1	3	2	1	3
MA-00090-273	MA-00090-273	16	10	10		1	16	10	10	9	7	11	9	11	11	12	12	9	9	6	8	13	15	12	14	11	11	12	14	12	11	11	12	5	3	6	5	6	5	7	7	5	4	3	4	7	9	6	8
MA-00090-276	MA-00090-276	57	57	57		1	57	57	57	37	41	41	41	38	38	34	37	30	29	30	31	50	55	56	52	51	53	53	55	46	46	49	43	37	41	41	41	38	38	34	37	30	29	30	31	50	55	56	52
MA-00090-277	MA-00090-277	20	20	20		1	20	20	20	8	12	9	11	10	10	13	10	10	12	8	10	13	14	10	11	11	10	12	16	10	8	13	10	8	12	9	11	10	10	13	10	10	12	8	10	13	14	10	11
MA-00090-281	MA-00090-281	1	1	1		1	1	1	1	0	0	0	0	1	0	0	0	0	0	0	0	0	0	0	0	0	0	0	0	0	1	0	0	0	0	0	0	1	0	0	0	0	0	0	0	0	0	0	0
MA-00090-284	MA-00090-284	11	11	11		1	11	11	11	4	2	0	2	1	0	1	3	1	2	2	3	5	6	5	3	4	3	5	4	1	5	4	5	4	2	0	2	1	0	1	3	1	2	2	3	5	6	5	3
MA-00090-29	MA-00090-29	2	2	2		1	2	2	2	2	2	2	2	2	2	2	2	2	2	2	2	2	2	2	2	2	2	2	2	2	2	2	2	2	2	2	2	2	2	2	2	2	2	2	2	2	2	2	2
MA-00090-292	MA-00090-292	15	15	15		1	15	15	15	11	10	11	12	11	9	11	13	11	13	13	13	12	9	11	13	12	12	12	12	11	12	12	11	11	10	11	12	11	9	11	13	11	13	13	13	12	9	11	13
MA-00090-295	MA-00090-295	21	21	21		1	21	21	21	12	14	10	14	11	10	10	10	12	13	10	12	15	16	16	13	14	14	12	16	12	9	12	14	12	14	10	14	11	10	10	10	12	13	10	12	15	16	16	13
MA-00090-296	MA-00090-296	14	14	14		1	14	14	14	7	9	10	10	6	8	8	8	7	8	9	6	8	6	6	6	7	10	5	8	7	8	9	9	7	9	10	10	6	8	8	8	7	8	9	6	8	6	6	6
MA-00090-297	MA-00090-297	3	2	1		1	3	2	1	1	0	2	0	1	1	0	1	1	1	0	2	0	1	0	1	1	0	0	0	2	2	0	2	0	0	2	0	1	1	0	0	1	1	0	1	0	0	0	0
MA-00090-300	MA-00090-300	7	7	7		1	7	7	7	5	3	3	4	5	3	3	5	1	2	3	3	4	3	5	3	2	4	2	4	4	3	4	4	5	3	3	4	5	3	3	5	1	2	3	3	4	3	5	3
MA-00090-303	MA-00090-303	2	2	2		1	2	2	2	2	2	2	2	1	1	2	1	1	1	1	1	1	2	2	1	1	2	1	2	2	2	1	2	2	2	2	2	1	1	2	1	1	1	1	1	1	2	2	1
MA-00090-305	MA-00090-305	10	10	10		1	10	10	10	1	2	0	0	0	0	0	0	0	0	0	1	5	7	7	4	2	2	3	3	2	1	1	1	1	2	0	0	0	0	0	0	0	0	0	1	5	7	7	4
MA-00090-306	MA-00090-306	5	5	5		1	5	5	5	2	3	2	1	2	3	1	2	1	0	0	2	2	1	1	1	4	3	3	2	2	2	3	3	2	3	2	1	2	3	1	2	1	0	0	2	2	1	1	1
MA-00090-308	MA-00090-308	17	17	17		1	17	17	17	12	11	11	11	11	10	13	10	9	9	12	10	11	8	12	10	12	11	11	13	11	11	15	12	12	11	11	11	11	10	13	10	9	9	12	10	11	8	12	10
MA-00090-310	MA-00090-310	11	11	11		1	11	11	11	4	2	2	4	4	5	1	4	2	5	2	5	3	4	7	7	4	4	4	3	2	4	4	3	4	2	2	4	4	5	1	4	2	5	2	5	3	4	7	7
MA-00090-313	MA-00090-313	3	3	3		1	3	3	3	1	1	1	1	1	2	2	1	2	1	1	1	1	1	1	2	2	1	2	1	1	1	1	1	1	1	1	1	1	2	2	1	2	1	1	1	1	1	1	2
MA-00090-315	MA-00090-315	7	7	7		1	7	7	7	3	5	3	4	5	4	5	5	4	3	2	2	4	3	3	2	4	5	4	5	3	4	5	4	3	5	3	4	5	4	5	5	4	3	2	2	4	3	3	2
MA-00090-32	MA-00090-32	3	3	3		1	3	3	3	1	2	2	1	1	0	1	2	2	1	1	1	2	1	2	2	2	1	2	1	1	1	0	1	1	2	2	1	1	0	1	2	2	1	1	1	2	1	2	2
MA-00090-320	MA-00090-320	15	15	15		1	15	15	15	14	13	14	13	12	13	12	13	12	10	9	10	13	13	13	12	13	13	10	14	13	12	14	13	14	13	14	13	12	13	12	13	12	10	9	10	13	13	13	12
MA-00090-324	MA-00090-324	15	15	15		1	15	15	15	5	7	7	6	5	6	4	7	7	4	3	4	7	7	6	3	5	6	5	3	6	9	6	5	5	7	7	6	5	6	4	7	7	4	3	4	7	7	6	3
MA-00090-33	MA-00090-33	1	1	1		1	1	1	1	0	0	0	0	0	0	0	0	0	0	0	0	1	1	1	0	1	0	0	0	1	1	0	0	0	0	0	0	0	0	0	0	0	0	0	0	1	1	1	0
MA-00090-330	MA-00090-330	3	3	2		1	3	3	2	2	1	1	1	2	2	2	1	1	2	1	1	0	1	2	1	1	2	2	1	2	2	2	1	2	1	1	1	2	2	2	1	1	2	1	1	0	1	2	1
MA-00090-331	MA-00090-331	7	7	7		1	7	7	7	4	4	2	3	2	4	4	5	3	3	3	3	1	1	1	1	3	3	5	2	6	3	4	5	4	4	2	3	2	4	4	5	3	3	3	3	1	1	1	1
MA-00090-334	MA-00090-334	5	5	5		1	5	5	5	1	0	0	0	1	2	0	0	2	3	5	4	0	0	0	0	0	0	0	0	0	0	0	0	1	0	0	0	1	2	0	0	2	3	5	4	0	0	0	0
MA-00090-346	MA-00090-346	27	27	27		1	27	27	27	16	19	17	16	20	15	17	17	13	13	15	15	18	22	20	14	19	19	16	18	16	14	21	19	16	19	17	16	20	15	17	17	13	13	15	15	18	22	20	14
MA-00090-348	MA-00090-348	9	3	3		1	9	3	3	7	7	5	4	6	7	5	6	5	4	5	5	7	8	8	6	8	8	7	7	6	6	6	7	2	2	1	1	1	2	1	1	1	0	1	1	1	3	3	1
MA-00090-349	MA-00090-349	57	57	57		1	57	57	57	46	51	48	50	50	46	47	48	41	42	46	45	48	46	46	37	43	48	44	46	44	46	47	47	46	51	48	50	50	46	47	48	41	42	46	45	48	46	46	37
MA-00090-351	MA-00090-351	3	3	3		1	3	3	3	1	1	1	2	1	2	1	3	2	2	0	2	1	3	2	2	3	2	3	2	2	1	1	1	1	1	1	2	1	2	1	3	2	2	0	2	1	3	2	2
MA-00090-352	MA-00090-352	35	23	23		1	35	23	23	22	23	21	22	20	21	21	20	17	19	16	19	30	32	32	30	32	29	32	33	23	24	27	26	11	13	9	12	11	10	10	9	7	9	6	8	19	21	21	18
MA-00090-353	MA-00090-353	1	1	1		1	1	1	1	0	0	0	0	0	0	0	0	0	0	0	1	0	0	0	0	0	0	0	0	0	0	0	0	0	0	0	0	0	0	0	0	0	0	0	1	0	0	0	0
MA-00090-356	MA-00090-356	1	1	1		1	1	1	1	1	1	1	0	0	1	1	1	1	1	1	0	0	0	0	0	0	1	1	1	1	1	1	1	1	1	1	0	0	1	1	1	1	1	1	0	0	0	0	0
MA-00090-360	MA-00090-360	2	2	2		1	2	2	2	0	0	0	0	1	1	0	0	1	2	0	1	0	0	0	0	0	0	0	0	0	0	0	0	0	0	0	0	1	1	0	0	1	2	0	1	0	0	0	0
MA-00090-363	MA-00090-363	6	6	6		1	6	6	6	5	4	5	5	5	6	6	4	4	6	5	5	5	5	6	2	5	5	5	6	4	6	6	5	5	4	5	5	5	6	6	4	4	6	5	5	5	5	6	2
MA-00090-365	MA-00090-365	3	3	3		1	3	3	3	1	0	0	1	0	1	2	1	1	1	1	1	0	0	1	0	1	2	1	2	1	1	1	2	1	0	0	1	0	1	2	1	1	1	1	1	0	0	1	0
MA-00090-367	MA-00090-367	10	10	10		1	10	10	10	6	5	5	5	4	4	5	6	3	4	3	1	1	4	4	2	5	2	4	2	3	3	3	3	6	5	5	5	4	4	5	6	3	4	3	1	1	4	4	2
MA-00090-37	MA-00090-37	9	9	9		1	9	9	9	4	3	3	4	3	3	3	4	5	5	4	1	4	3	2	2	3	3	3	2	6	4	3	3	4	3	3	4	3	3	3	4	5	5	4	1	4	3	2	2
MA-00090-377	MA-00090-377	17	17	17		1	17	17	17	10	11	12	11	11	16	12	11	11	10	12	11	14	14	14	13	13	10	12	12	11	10	11	12	10	11	12	11	11	16	12	11	11	10	12	11	14	14	14	13
MA-00090-379	MA-00090-379	11	11	11		1	11	11	11	4	3	2	5	3	5	5	3	1	3	3	0	1	1	3	4	1	2	4	2	2	6	3	2	4	3	2	5	3	5	5	3	1	3	3	0	1	1	3	4
MA-00090-38	MA-00090-38	2	2	2		1	2	2	2	0	0	0	1	1	2	1	0	0	0	0	0	0	1	1	0	0	0	1	1	0	0	1	1	0	0	0	1	1	2	1	0	0	0	0	0	0	1	1	0
MA-00090-382	MA-00090-382	5	5	5		1	5	5	5	2	1	1	2	3	1	2	1	2	1	0	0	1	2	2	2	3	3	2	2	2	3	3	2	2	1	1	2	3	1	2	1	2	1	0	0	1	2	2	2
MA-00090-383	MA-00090-383	3	3	3		1	3	3	3	3	1	2	2	2	1	2	1	3	2	2	1	3	3	3	3	3	3	3	3	3	1	2	2	3	1	2	2	2	1	2	1	3	2	2	1	3	3	3	3
MA-00090-385	MA-00090-385	7	7	7		1	7	7	7	1	1	1	1	0	1	1	1	0	1	1	2	0	2	2	3	2	2	1	1	4	3	4	3	1	1	1	1	0	1	1	1	0	1	1	2	0	2	2	3
MA-00090-388	MA-00090-388	29	29	29		1	29	29	29	20	22	21	22	21	21	19	20	20	21	21	22	24	17	24	21	19	20	21	21	22	20	20	22	20	22	21	22	21	21	19	20	20	21	21	22	24	17	24	21
MA-00090-390;MA-00297-502	MA-00090-390	7;2	7;2	7;2		2	7	7	7	6	6	5	6	5	4	6	3	5	4	3	3	4	5	5	4	2	3	3	3	5	1	5	5	6	6	5	6	5	4	6	3	5	4	3	3	4	5	5	4
MA-00090-391	MA-00090-391	27	27	14		1	27	27	14	23	18	19	20	19	19	20	19	18	19	20	19	23	23	24	24	24	24	23	23	23	20	19	22	23	18	19	20	19	19	20	19	18	19	20	19	23	23	24	24
MA-00090-395	MA-00090-395	1	1	1		1	1	1	1	0	0	0	0	0	0	0	0	0	1	0	0	1	0	1	1	1	1	1	1	0	0	0	1	0	0	0	0	0	0	0	0	0	1	0	0	1	0	1	1
MA-00090-396	MA-00090-396	9	9	5		1	9	9	5	6	6	7	7	5	6	4	4	2	3	3	2	6	3	4	5	7	5	6	6	6	6	6	6	6	6	7	7	5	6	4	4	2	3	3	2	6	3	4	5
MA-00090-405	MA-00090-405	6	6	5		1	6	6	5	2	1	2	2	0	1	2	1	0	0	0	1	2	3	3	5	3	5	5	4	3	1	4	3	2	1	2	2	0	1	2	1	0	0	0	1	2	3	3	5
MA-00090-409	MA-00090-409	4	4	4		1	4	4	4	2	2	2	1	2	1	0	3	0	0	1	1	2	2	1	3	2	3	2	4	3	2	3	2	2	2	2	1	2	1	0	3	0	0	1	1	2	2	1	3
MA-00297-350;MA-00090-413	MA-00297-350;MA-00090-413	6;6	6;6	6;6	;	2	6	6	6	3	3	4	4	6	6	6	4	5	4	4	5	1	5	2	3	3	3	4	5	4	3	2	3	3	3	4	4	6	6	6	4	5	4	4	5	1	5	2	3
MA-00090-415	MA-00090-415	3	3	3		1	3	3	3	3	3	3	3	3	2	3	3	3	3	3	3	2	3	3	3	3	3	3	3	3	3	3	3	3	3	3	3	3	2	3	3	3	3	3	3	2	3	3	3
MA-00090-416	MA-00090-416	5	5	5		1	5	5	5	4	3	4	4	3	2	3	3	3	3	3	3	3	4	3	3	1	4	4	4	4	3	4	4	4	3	4	4	3	2	3	3	3	3	3	3	3	4	3	3
MA-00090-420	MA-00090-420	2	2	2		1	2	2	2	0	2	2	1	0	2	0	0	1	1	1	0	1	0	0	0	0	0	0	0	1	1	1	1	0	2	2	1	0	2	0	0	1	1	1	0	1	0	0	0
MA-00090-427	MA-00090-427	20	20	20		1	20	20	20	17	16	16	19	16	19	18	16	14	14	14	15	9	10	14	11	14	13	15	15	14	14	18	16	17	16	16	19	16	19	18	16	14	14	14	15	9	10	14	11
MA-00090-429	MA-00090-429	10	10	9		1	10	10	9	3	5	3	6	5	5	4	5	4	5	3	5	5	6	7	6	6	7	8	7	7	6	5	5	3	5	3	6	5	5	4	5	4	5	3	5	5	6	7	6
MA-00090-43	MA-00090-43	4	4	4		1	4	4	4	3	3	3	3	3	4	3	4	3	3	3	4	2	0	0	0	1	1	0	0	3	3	3	1	3	3	3	3	3	4	3	4	3	3	3	4	2	0	0	0
MA-00090-431	MA-00090-431	2	2	2		1	2	2	2	0	0	0	0	0	1	0	0	0	0	0	0	0	1	1	1	1	1	0	0	0	2	1	1	0	0	0	0	0	1	0	0	0	0	0	0	0	1	1	1
MA-00090-434	MA-00090-434	28	28	28		1	28	28	28	18	17	14	17	14	18	17	17	14	14	11	13	21	21	25	20	21	19	20	21	17	17	17	17	18	17	14	17	14	18	17	17	14	14	11	13	21	21	25	20
MA-00090-436	MA-00090-436	40	39	3		1	40	39	3	29	32	28	32	34	32	33	31	28	32	31	30	33	31	34	29	29	32	32	32	29	26	32	32	29	32	28	32	34	32	33	31	28	32	31	30	32	31	34	29
MA-00090-441;MA-00002-3;MA-00072-172	MA-00090-441;MA-00002-3	4;3;1	4;3;1	3;2;0	;	3	4	4	3	0	1	1	2	1	1	0	1	1	2	1	0	0	1	1	1	2	1	2	2	0	3	2	1	0	1	1	2	1	1	0	1	1	2	1	0	0	1	1	1
MA-00090-442	MA-00090-442	2	2	2		1	2	2	2	1	1	0	1	1	1	1	1	1	1	1	1	1	1	2	0	1	1	1	2	1	1	1	1	1	1	0	1	1	1	1	1	1	1	1	1	1	1	2	0
MA-00090-443	MA-00090-443	20	20	20		1	20	20	20	15	15	11	12	12	13	9	11	11	10	12	11	18	15	16	18	16	17	18	18	15	15	15	14	15	15	11	12	12	13	9	11	11	10	12	11	18	15	16	18
MA-00090-447	MA-00090-447	3	3	3		1	3	3	3	2	1	1	2	2	2	2	1	2	1	2	2	3	2	3	2	1	2	2	2	2	2	2	2	2	1	1	2	2	2	2	1	2	1	2	2	3	2	3	2
MA-00090-451	MA-00090-451	1	1	1		1	1	1	1	0	0	0	0	1	0	0	1	0	0	0	0	0	0	0	0	0	0	0	0	0	0	0	0	0	0	0	0	1	0	0	1	0	0	0	0	0	0	0	0
MA-00090-452	MA-00090-452	31	31	31		1	31	31	31	17	15	15	16	16	19	19	19	10	13	10	13	17	21	21	17	18	21	18	20	18	16	18	18	17	15	15	16	16	19	19	19	10	13	10	13	17	21	21	17
MA-00090-454	MA-00090-454	3	3	3		1	3	3	3	2	2	1	2	2	2	2	2	0	0	0	0	0	0	0	0	1	0	1	1	2	0	0	2	2	2	1	2	2	2	2	2	0	0	0	0	0	0	0	0
MA-00090-459	MA-00090-459	12	12	12		1	12	12	12	7	3	6	7	5	6	5	5	3	6	4	8	5	7	6	2	5	6	5	7	5	4	6	7	7	3	6	7	5	6	5	5	3	6	4	8	5	7	6	2
MA-00090-460	MA-00090-460	11	11	11		1	11	11	11	8	9	9	9	9	9	9	9	10	8	9	10	8	9	9	8	9	8	9	9	9	7	9	9	8	9	9	9	9	9	9	9	10	8	9	10	8	9	9	8
MA-00090-462	MA-00090-462	2	2	2		1	2	2	2	0	0	0	0	0	0	0	0	0	0	0	0	1	0	1	1	1	0	1	0	0	0	0	0	0	0	0	0	0	0	0	0	0	0	0	0	1	0	1	1
MA-00090-463	MA-00090-463	7	7	7		1	7	7	7	3	3	3	3	4	4	5	3	3	4	4	5	2	4	3	3	4	3	4	4	3	1	3	3	3	3	3	3	4	4	5	3	3	4	4	5	2	4	3	3
MA-00090-466	MA-00090-466	11	11	11		1	11	11	11	9	8	10	9	8	8	8	10	10	9	10	8	5	3	4	5	8	6	6	9	8	8	8	10	9	8	10	9	8	8	8	10	10	9	10	8	5	3	4	5
MA-00090-467	MA-00090-467	10	10	10		1	10	10	10	2	2	2	2	2	2	2	2	1	1	1	3	6	9	8	7	7	7	7	8	3	4	3	3	2	2	2	2	2	2	2	2	1	1	1	3	6	9	8	7
MA-00090-469	MA-00090-469	8	8	8		1	8	8	8	2	4	3	3	4	4	3	3	2	3	3	2	6	5	4	6	6	6	6	6	2	4	7	4	2	4	3	3	4	4	3	3	2	3	3	2	6	5	4	6
MA-00090-481	MA-00090-481	12	12	12		1	12	12	12	5	9	5	8	5	5	4	5	5	8	4	5	8	7	7	4	9	4	8	10	6	7	8	9	5	9	5	8	5	5	4	5	5	8	4	5	8	7	7	4
MA-00090-483	MA-00090-483	31	31	31		1	31	31	31	20	20	20	20	23	21	18	23	18	20	19	23	20	27	25	21	21	22	25	23	20	20	23	24	20	20	20	20	23	21	18	23	18	20	19	23	20	27	25	21
MA-00090-484	MA-00090-484	1	1	1		1	1	1	1	1	1	0	0	1	1	1	1	0	1	0	1	1	0	0	0	1	0	1	1	0	1	0	0	1	1	0	0	1	1	1	1	0	1	0	1	1	0	0	0
MA-00090-485	MA-00090-485	23	23	23		1	23	23	23	20	19	20	21	19	22	22	20	18	19	18	19	16	21	21	20	21	19	21	21	20	20	21	22	20	19	20	21	19	22	22	20	18	19	18	19	16	21	21	20
MA-00090-486	MA-00090-486	6	6	6		1	6	6	6	5	6	5	4	6	6	6	6	5	5	5	6	6	5	6	5	6	6	6	5	6	5	6	6	5	6	5	4	6	6	6	6	5	5	5	6	6	5	6	5
MA-00090-489	MA-00090-489	32	32	32		1	32	32	32	21	21	21	22	22	19	22	23	19	16	15	21	15	16	17	11	19	19	19	18	20	20	23	22	21	21	21	22	22	19	22	23	19	16	15	21	15	16	17	11
MA-00090-490	MA-00090-490	1	1	1		1	1	1	1	0	0	0	0	0	0	1	0	1	0	0	0	1	1	0	0	0	0	0	0	0	0	0	0	0	0	0	0	0	0	1	0	1	0	0	0	1	1	0	0
MA-00090-502	MA-00090-502	3	3	3		1	3	3	3	3	3	2	2	1	2	2	2	2	2	2	2	1	1	2	2	1	2	2	3	3	3	1	2	3	3	2	2	1	2	2	2	2	2	2	2	1	1	2	2
MA-00090-504	MA-00090-504	6	6	6		1	6	6	6	3	2	2	3	4	2	3	3	3	3	2	3	3	3	2	2	3	5	3	3	3	3	4	3	3	2	2	3	4	2	3	3	3	3	2	3	3	3	2	2
MA-00090-505	MA-00090-505	15	15	15		1	15	15	15	10	6	5	7	5	8	8	7	7	8	4	10	6	7	7	5	8	7	8	5	6	6	5	7	10	6	5	7	5	8	8	7	7	8	4	10	6	7	7	5
MA-00090-508	MA-00090-508	6	6	6		1	6	6	6	3	3	3	2	4	4	3	2	2	4	3	3	4	1	1	2	5	3	2	4	3	4	4	3	3	3	3	2	4	4	3	2	2	4	3	3	4	1	1	2
MA-00090-512	MA-00090-512	1	1	1		1	1	1	1	0	0	0	0	0	0	0	0	0	0	1	0	0	0	0	0	0	0	0	0	0	0	0	0	0	0	0	0	0	0	0	0	0	0	1	0	0	0	0	0
MA-00090-513;MA-00297-532	MA-00090-513;MA-00297-532	2;1	2;1	2;1	;	2	2	2	2	1	1	1	1	1	1	1	1	1	1	1	1	2	2	2	2	1	2	2	1	1	1	1	2	1	1	1	1	1	1	1	1	1	1	1	1	2	2	2	2
MA-00090-514;MA-00297-543	MA-00090-514	10;1	10;1	10;1		2	10	10	10	4	5	6	5	5	4	5	5	7	6	5	6	4	5	6	5	5	6	7	5	5	7	7	6	4	5	6	5	5	4	5	5	7	6	5	6	4	5	6	5
MA-00090-522	MA-00090-522	29	9	9		1	29	9	9	14	14	13	16	16	12	15	15	13	12	13	14	22	27	27	22	22	21	25	21	15	14	16	16	0	0	0	0	0	0	1	1	0	0	0	1	7	7	7	7
MA-00090-524	MA-00090-524	4	4	4		1	4	4	4	3	2	2	2	1	2	1	1	1	1	1	1	2	3	3	3	3	3	2	3	1	2	2	2	3	2	2	2	1	2	1	1	1	1	1	1	2	3	3	3
MA-00090-525	MA-00090-525	12	12	12		1	12	12	12	3	4	3	4	3	4	3	5	4	4	5	3	6	5	7	5	4	4	5	5	3	4	4	3	3	4	3	4	3	4	3	5	4	4	5	3	6	5	7	5
MA-00090-526	MA-00090-526	3	3	3		1	3	3	3	1	1	0	1	0	0	0	1	0	1	0	0	1	2	2	3	1	2	0	1	0	1	2	0	1	1	0	1	0	0	0	1	0	1	0	0	1	2	2	3
MA-00090-527	MA-00090-527	4	4	4		1	4	4	4	2	4	3	3	4	4	2	3	3	2	3	3	2	3	2	1	2	3	2	2	1	3	3	3	2	4	3	3	4	4	2	3	3	2	3	3	2	3	2	1
MA-00090-530	MA-00090-530	24	9	9		1	24	9	9	21	21	23	21	22	22	21	22	21	20	18	19	22	22	22	22	21	22	23	24	20	22	22	21	7	7	9	8	9	8	8	8	8	7	6	6	8	8	8	8
MA-00090-531	MA-00090-531	7	7	7		1	7	7	7	4	5	4	4	4	4	5	4	3	3	4	3	1	2	2	4	3	3	3	2	1	4	2	3	4	5	4	4	4	4	5	4	3	3	4	3	1	2	2	4
MA-00090-532	MA-00090-532	3	3	3		1	3	3	3	1	1	1	0	0	2	0	1	0	1	0	0	0	1	1	2	0	2	1	1	1	1	0	1	1	1	1	0	0	2	0	1	0	1	0	0	0	1	1	2
MA-00090-538	MA-00090-538	13	13	13		1	13	13	13	9	6	5	8	6	10	10	10	6	7	8	7	5	7	5	3	9	9	9	4	8	5	10	8	9	6	5	8	6	10	10	10	6	7	8	7	5	7	5	3
MA-00090-540	MA-00090-540	10	10	10		1	10	10	10	3	5	4	2	1	3	5	1	5	4	3	1	6	3	1	2	1	2	2	3	3	4	6	2	3	5	4	2	1	3	5	1	5	4	3	1	6	3	1	2
MA-00090-542;MA-00213-501;MA-00334-29	MA-00090-542	13;1;1	12;0;0	12;0;0		3	13	12	12	10	9	10	7	9	11	8	9	7	8	9	8	6	5	6	5	4	6	4	8	8	6	8	8	9	8	9	6	8	10	7	8	6	7	8	7	5	4	5	4
MA-00090-544	MA-00090-544	14	14	14		1	14	14	14	11	10	9	12	10	11	10	10	10	8	12	11	13	12	10	12	9	12	11	12	12	13	14	12	11	10	9	12	10	11	10	10	10	8	12	11	13	12	10	12
MA-00090-547	MA-00090-547	4	4	4		1	4	4	4	2	2	0	1	1	1	0	1	1	1	1	1	3	3	2	3	2	1	3	3	2	2	2	2	2	2	0	1	1	1	0	1	1	1	1	1	3	3	2	3
MA-00090-60	MA-00090-60	2	2	2		1	2	2	2	1	2	0	1	1	0	1	0	1	1	1	1	0	2	1	2	1	1	1	2	1	0	1	1	1	2	0	1	1	0	1	0	1	1	1	1	0	2	1	2
MA-00090-63	MA-00090-63	2	2	2		1	2	2	2	1	2	1	1	1	1	1	1	1	1	1	1	1	1	1	1	1	1	1	1	1	1	1	0	1	2	1	1	1	1	1	1	1	1	1	1	1	1	1	1
MA-00090-68	MA-00090-68	1	1	1		1	1	1	1	1	0	0	0	0	0	0	0	0	0	0	0	0	0	0	0	0	0	0	0	1	0	0	1	1	0	0	0	0	0	0	0	0	0	0	0	0	0	0	0
MA-00090-70	MA-00090-70	12	12	3		1	12	12	3	7	9	7	6	9	7	10	9	8	8	7	6	5	7	6	5	6	5	5	6	8	6	10	7	7	9	7	6	9	7	10	9	8	8	7	6	5	7	6	5
MA-00090-71	MA-00090-71	1	1	1		1	1	1	1	0	1	0	0	0	0	0	0	1	0	1	0	0	0	1	0	1	0	0	0	0	0	1	0	0	1	0	0	0	0	0	0	1	0	1	0	0	0	1	0
MA-00090-78	MA-00090-78	5	5	5		1	5	5	5	1	0	0	0	1	1	1	0	0	1	1	0	4	2	2	0	2	1	2	1	0	0	1	1	1	0	0	0	1	1	1	0	0	1	1	0	4	2	2	0
MA-00090-8	MA-00090-8	9	9	9		1	9	9	9	3	2	1	1	2	3	1	2	3	2	2	3	7	6	4	5	4	4	5	6	2	3	3	3	3	2	1	1	2	3	1	2	3	2	2	3	7	6	4	5
MA-00090-86	MA-00090-86	1	1	1		1	1	1	1	0	0	0	1	1	0	1	1	1	1	0	1	0	1	0	0	0	0	0	1	0	1	1	0	0	0	0	1	1	0	1	1	1	1	0	1	0	1	0	0
MA-00090-88	MA-00090-88	3	3	3		1	3	3	3	0	0	1	0	0	0	1	0	0	0	0	0	2	0	1	1	0	2	2	1	1	0	1	0	0	0	1	0	0	0	1	0	0	0	0	0	2	0	1	1
MA-00090-9	MA-00090-9	10	10	10		1	10	10	10	8	8	8	8	7	7	8	8	6	7	6	6	8	8	7	7	7	9	8	9	8	7	7	9	8	8	8	8	7	7	8	8	6	7	6	6	8	8	7	7
MA-00090-91	MA-00090-91	8	8	8		1	8	8	8	8	8	6	8	7	6	8	6	6	5	6	6	6	7	7	6	8	8	8	8	7	7	6	7	8	8	6	8	7	6	8	6	6	5	6	6	6	7	7	6
MA-00090-95;MA-00213-14	MA-00090-95;MA-00213-14	4;3	4;3	4;3	;	2	4	4	4	2	2	2	2	2	2	2	2	1	2	2	2	1	2	2	1	2	3	2	2	2	2	3	2	2	2	2	2	2	2	2	2	1	2	2	2	1	2	2	1
MA-00091-1	MA-00091-1	7	7	7		1	7	7	7	4	4	3	5	2	1	3	3	2	1	4	2	1	3	5	4	2	3	3	4	4	2	5	4	4	4	3	5	2	1	3	3	2	1	4	2	1	3	5	4
MA-00092-1	MA-00092-1	2	2	2		1	2	2	2	2	0	1	1	0	1	2	1	0	0	0	1	1	0	0	1	2	1	1	0	1	1	1	1	2	0	1	1	0	1	2	1	0	0	0	1	1	0	0	1
MA-00092-2	MA-00092-2	5	5	5		1	5	5	5	4	5	4	4	4	4	4	5	1	3	2	1	1	0	0	0	4	0	1	2	3	5	5	4	4	5	4	4	4	4	4	5	1	3	2	1	1	0	0	0
MA-00092-3	MA-00092-3	13	13	13		1	13	13	13	11	10	9	9	11	10	9	10	8	8	9	8	7	5	8	8	5	6	7	8	10	8	8	8	11	10	9	9	11	10	9	10	8	8	9	8	7	5	8	8
MA-00095-4	MA-00095-4	1	1	1		1	1	1	1	0	0	1	1	1	1	1	1	1	1	1	1	1	0	1	1	1	1	1	0	1	1	1	1	0	0	1	1	1	1	1	1	1	1	1	1	1	0	1	1
MA-00095-5	MA-00095-5	1	1	1		1	1	1	1	1	1	1	1	1	0	0	1	0	0	0	0	1	1	1	1	1	1	1	1	1	1	0	0	1	1	1	1	1	0	0	1	0	0	0	0	1	1	1	1
MA-00101-100	MA-00101-100	1	1	1		1	1	1	1	0	0	0	0	0	0	0	0	0	0	0	0	0	1	0	0	0	0	0	0	0	0	0	0	0	0	0	0	0	0	0	0	0	0	0	0	0	1	0	0
MA-00101-103	MA-00101-103	12	12	12		1	12	12	12	7	7	6	9	7	8	7	8	7	6	6	9	9	9	10	8	9	5	8	8	9	7	7	8	7	7	6	9	7	8	7	8	7	6	6	9	9	9	10	8
MA-00101-105	MA-00101-105	2	2	2		1	2	2	2	2	1	1	2	2	1	2	2	2	2	2	2	2	0	2	2	2	2	1	2	2	2	2	2	2	1	1	2	2	1	2	2	2	2	2	2	2	0	2	2
MA-00101-111	MA-00101-111	3	3	3		1	3	3	3	1	1	2	2	1	1	2	1	3	1	1	1	0	2	2	1	1	1	0	1	2	1	2	1	1	1	2	2	1	1	2	1	3	1	1	1	0	2	2	1
MA-00101-115	MA-00101-115	2	2	2		1	2	2	2	1	1	0	0	1	1	0	0	0	0	0	0	1	1	0	0	0	0	1	1	0	0	1	1	1	1	0	0	1	1	0	0	0	0	0	0	1	1	0	0
MA-00101-12	MA-00101-12	3	3	3		1	3	3	3	1	0	0	0	1	0	0	2	0	0	0	0	0	2	0	0	0	0	0	1	1	0	0	1	1	0	0	0	1	0	0	2	0	0	0	0	0	2	0	0
MA-00101-120	MA-00101-120	28	28	28		1	28	28	28	26	26	26	28	27	25	27	27	25	25	26	26	19	17	17	19	23	22	22	25	26	24	24	26	26	26	26	28	27	25	27	27	25	25	26	26	19	17	17	19
MA-00101-121	MA-00101-121	6	6	6		1	6	6	6	1	3	0	3	2	4	1	1	1	2	2	1	2	0	2	2	1	0	2	1	3	2	4	1	1	3	0	3	2	4	1	1	1	2	2	1	2	0	2	2
MA-00101-123	MA-00101-123	3	3	3		1	3	3	3	1	1	0	1	1	0	0	0	0	0	0	0	1	0	0	0	0	1	0	0	0	1	2	1	1	1	0	1	1	0	0	0	0	0	0	0	1	0	0	0
MA-00101-125	MA-00101-125	4	4	4		1	4	4	4	2	2	2	2	3	3	4	0	2	3	3	2	1	1	0	1	1	0	2	1	2	1	1	2	2	2	2	2	3	3	4	0	2	3	3	2	1	1	0	1
MA-00101-129	MA-00101-129	4	4	3		1	4	4	3	2	1	1	1	1	1	2	1	1	1	1	1	1	2	1	2	1	1	2	1	1	3	1	1	2	1	1	1	1	1	2	1	1	1	1	1	1	2	1	2
MA-00101-130	MA-00101-130	2	2	2		1	2	2	2	1	1	1	1	1	1	0	0	1	1	1	0	0	0	0	0	0	0	0	0	0	1	0	0	1	1	1	1	1	1	0	0	1	1	1	0	0	0	0	0
MA-00101-135	MA-00101-135	1	1	1		1	1	1	1	1	1	1	1	1	1	1	1	1	1	1	1	0	0	1	0	1	1	1	1	1	1	1	1	1	1	1	1	1	1	1	1	1	1	1	1	0	0	1	0
MA-00101-138;MA-00112-85	MA-00101-138	6;1	6;1	6;1		2	6	6	6	2	3	2	2	2	3	3	2	2	1	3	2	0	3	3	1	1	3	1	1	2	2	4	2	2	3	2	2	2	3	3	2	2	1	3	2	0	3	3	1
MA-00101-139	MA-00101-139	3	3	3		1	3	3	3	1	2	1	2	1	1	1	2	0	1	0	2	2	3	3	1	1	3	3	3	2	0	2	2	1	2	1	2	1	1	1	2	0	1	0	2	2	3	3	1
MA-00101-142	MA-00101-142	6	6	5		1	6	6	5	1	2	0	0	3	1	0	0	0	0	0	0	3	1	4	3	4	4	4	2	2	2	2	2	1	2	0	0	3	1	0	0	0	0	0	0	3	1	4	3
MA-00101-143;MA-00139-63	MA-00101-143	15;1	15;1	15;1		2	15	15	15	11	7	12	9	11	9	8	12	8	7	6	11	13	13	14	11	14	14	14	14	10	12	13	13	11	7	12	9	11	9	8	12	8	7	6	11	13	13	14	11
MA-00101-145	MA-00101-145	1	1	1		1	1	1	1	1	0	0	1	1	1	1	0	0	0	0	1	1	1	0	1	0	1	1	1	1	0	1	1	1	0	0	1	1	1	1	0	0	0	0	1	1	1	0	1
MA-00101-146	MA-00101-146	2	2	2		1	2	2	2	2	1	1	1	2	1	1	1	1	1	1	1	2	2	2	2	2	0	2	2	1	2	1	2	2	1	1	1	2	1	1	1	1	1	1	1	2	2	2	2
MA-00101-147	MA-00101-147	4	4	4		1	4	4	4	2	2	1	3	2	2	1	1	2	1	1	2	0	0	0	1	0	1	0	1	4	2	2	3	2	2	1	3	2	2	1	1	2	1	1	2	0	0	0	1
MA-00101-150	MA-00101-150	7	7	5		1	7	7	5	6	5	4	5	5	6	5	4	5	6	5	6	5	5	6	7	5	6	6	6	4	6	6	5	6	5	4	5	5	6	5	4	5	6	5	6	5	5	6	7
MA-00101-152	MA-00101-152	4	4	4		1	4	4	4	3	3	3	3	2	3	3	4	4	3	2	3	4	4	4	3	4	2	4	4	3	2	3	3	3	3	3	3	2	3	3	4	4	3	2	3	4	4	4	3
MA-00101-153	MA-00101-153	15	2	2		1	15	2	2	12	13	12	14	12	13	14	13	14	12	13	12	14	14	12	14	15	13	14	12	14	13	13	14	2	2	2	2	2	2	2	2	2	2	2	2	2	2	2	2
MA-00101-154	MA-00101-154	11	11	11		1	11	11	11	8	4	6	6	6	7	7	5	7	4	5	6	4	5	5	5	5	5	6	6	7	6	5	7	8	4	6	6	6	7	7	5	7	4	5	6	4	5	5	5
MA-00101-155	MA-00101-155	3	3	3		1	3	3	3	0	1	2	0	0	0	0	0	0	0	0	0	3	1	3	1	2	3	2	1	1	1	0	0	0	1	2	0	0	0	0	0	0	0	0	0	3	1	3	1
MA-00101-158	MA-00101-158	22	8	6		1	22	8	6	16	17	15	18	15	18	14	17	13	16	13	14	18	17	18	15	18	17	17	18	19	17	17	18	4	5	3	6	2	6	3	4	1	3	1	3	7	5	7	5
MA-00153-330;MA-00101-160	MA-00153-330;MA-00101-160	3;3	3;3	3;3	;	2	3	3	3	0	0	1	1	2	2	2	2	0	0	0	1	0	2	2	0	0	1	1	2	0	0	1	1	0	0	1	1	2	2	2	2	0	0	0	1	0	2	2	0
MA-00101-164	MA-00101-164	4	4	4		1	4	4	4	1	2	2	2	3	2	4	3	4	2	2	2	3	2	2	2	3	1	2	3	2	2	2	3	1	2	2	2	3	2	4	3	4	2	2	2	3	2	2	2
MA-00101-168	MA-00101-168	2	2	2		1	2	2	2	0	0	0	0	1	1	1	0	0	1	0	0	0	0	0	0	0	0	1	1	0	0	0	0	0	0	0	0	1	1	1	0	0	1	0	0	0	0	0	0
MA-00101-179	MA-00101-179	3	3	3		1	3	3	3	1	1	1	1	0	2	1	1	0	0	0	0	0	1	1	1	0	1	2	1	2	1	1	2	1	1	1	1	0	2	1	1	0	0	0	0	0	1	1	1
MA-00101-180	MA-00101-180	6	6	6		1	6	6	6	6	5	3	5	6	5	6	5	5	4	5	4	3	5	6	4	6	3	5	4	6	5	6	6	6	5	3	5	6	5	6	5	5	4	5	4	3	5	6	4
MA-00101-181	MA-00101-181	5	5	5		1	5	5	5	2	0	0	0	0	0	0	0	0	1	0	1	4	3	4	3	0	1	1	0	0	0	0	1	2	0	0	0	0	0	0	0	0	1	0	1	4	3	4	3
MA-00101-185	MA-00101-185	10	10	10		1	10	10	10	3	3	2	3	2	2	5	1	3	2	3	2	5	5	8	5	5	4	5	5	3	3	3	3	3	3	2	3	2	2	5	1	3	2	3	2	5	5	8	5
MA-00101-186	MA-00101-186	29	24	24		1	29	24	24	16	16	17	15	19	19	20	15	18	17	17	16	16	21	18	14	21	19	20	19	17	19	18	23	13	12	13	12	15	14	15	10	14	12	12	12	12	17	15	10
MA-00101-189	MA-00101-189	1	1	1		1	1	1	1	1	1	1	1	1	1	1	1	1	0	1	0	0	0	1	0	1	0	1	0	1	1	1	1	1	1	1	1	1	1	1	1	1	0	1	0	0	0	1	0
MA-00101-191	MA-00101-191	2	2	2		1	2	2	2	2	1	2	1	2	2	2	2	2	0	2	2	2	2	2	2	2	1	2	2	1	2	2	2	2	1	2	1	2	2	2	2	2	0	2	2	2	2	2	2
MA-00101-193	MA-00101-193	9	8	8		1	9	8	8	3	7	4	5	5	6	5	6	4	4	5	4	7	6	5	5	5	3	6	7	6	2	5	5	3	7	4	5	5	6	5	6	4	4	5	4	6	6	5	5
MA-00101-200	MA-00101-200	14	14	14		1	14	14	14	7	7	6	9	7	6	5	4	4	4	4	5	10	9	7	10	8	7	8	9	10	8	10	7	7	7	6	9	7	6	5	4	4	4	4	5	10	9	7	10
MA-00101-201	MA-00101-201	2	2	2		1	2	2	2	1	1	0	0	1	1	0	1	0	0	0	1	0	1	2	0	1	1	2	1	1	0	0	1	1	1	0	0	1	1	0	1	0	0	0	1	0	1	2	0
MA-00184-578;MA-00182-12;MA-00153-15;MA-00101-202	MA-00184-578;MA-00182-12;MA-00153-15;MA-00101-202	3;3;3;3	3;3;3;3	3;3;3;3	;;;	4	3	3	3	2	1	1	0	2	3	3	1	2	1	1	1	1	0	0	0	0	0	1	1	0	1	0	0	2	1	1	0	2	3	3	1	2	1	1	1	1	0	0	0
MA-00101-204	MA-00101-204	11	11	11		1	11	11	11	8	5	6	4	3	7	3	4	3	5	6	5	6	5	8	5	7	7	6	8	6	5	7	5	8	5	6	4	3	7	3	4	3	5	6	5	6	5	8	5
MA-00101-205	MA-00101-205	8	8	8		1	8	8	8	2	1	1	1	1	0	1	1	0	0	0	0	5	7	7	3	6	5	4	4	2	1	3	1	2	1	1	1	1	0	1	1	0	0	0	0	5	7	7	3
MA-00101-207	MA-00101-207	9	9	9		1	9	9	9	5	4	4	4	3	4	6	2	3	5	3	2	3	4	8	4	3	4	4	7	5	2	5	5	5	4	4	4	3	4	6	2	3	5	3	2	3	4	8	4
MA-00101-208	MA-00101-208	13	13	13		1	13	13	13	4	4	6	4	7	7	6	5	6	5	4	5	10	10	9	10	9	12	8	10	10	9	10	10	4	4	6	4	7	7	6	5	6	5	4	5	10	10	9	10
MA-00101-211	MA-00101-211	6	6	6		1	6	6	6	6	4	5	4	4	5	4	5	4	2	4	4	3	5	6	5	3	4	6	6	4	4	5	4	6	4	5	4	4	5	4	5	4	2	4	4	3	5	6	5
MA-00101-216;MA-00153-290	MA-00101-216	8;1	8;1	8;1		2	8	8	8	0	1	0	3	2	1	1	0	0	1	0	0	7	6	8	6	4	7	6	5	2	5	2	2	0	1	0	3	2	1	1	0	0	1	0	0	7	6	8	6
MA-00101-219	MA-00101-219	15	15	15		1	15	15	15	14	14	14	12	13	13	11	12	13	10	13	12	10	12	12	8	11	10	11	12	12	13	13	12	14	14	14	12	13	13	11	12	13	10	13	12	10	12	12	8
MA-00101-220	MA-00101-220	9	9	9		1	9	9	9	6	6	5	6	5	8	5	5	7	4	4	5	8	7	7	6	7	7	6	7	6	5	7	7	6	6	5	6	5	8	5	5	7	4	4	5	8	7	7	6
MA-00101-223	MA-00101-223	26	26	26		1	26	26	26	18	20	18	19	15	21	20	21	18	19	19	16	12	16	18	17	19	17	19	21	20	14	21	21	18	20	18	19	15	21	20	21	18	19	19	16	12	16	18	17
MA-00101-224	MA-00101-224	7	7	7		1	7	7	7	2	0	1	0	1	2	0	0	0	0	0	0	7	6	5	6	5	5	2	6	0	0	0	0	2	0	1	0	1	2	0	0	0	0	0	0	7	6	5	6
MA-00101-227	MA-00101-227	1	1	1		1	1	1	1	1	1	0	1	0	1	0	1	1	0	0	0	0	0	0	0	0	0	1	0	1	0	0	1	1	1	0	1	0	1	0	1	1	0	0	0	0	0	0	0
MA-00101-228	MA-00101-228	2	2	2		1	2	2	2	0	2	0	0	0	0	0	0	0	0	1	0	0	0	0	0	0	0	0	0	1	1	0	1	0	2	0	0	0	0	0	0	0	0	1	0	0	0	0	0
MA-00101-233	MA-00101-233	12	12	11		1	12	12	11	10	9	9	11	10	9	11	9	9	8	7	6	9	11	11	10	11	10	11	12	10	10	9	9	10	9	9	11	10	9	11	9	9	8	7	6	9	11	11	10
MA-00101-235	MA-00101-235	3	3	3		1	3	3	3	0	2	0	0	2	0	0	0	0	1	1	1	1	1	1	1	2	2	3	2	1	2	2	1	0	2	0	0	2	0	0	0	0	1	1	1	1	1	1	1
MA-00101-243	MA-00101-243	7	7	6		1	7	7	6	2	4	4	4	6	5	5	2	3	4	4	4	0	0	0	0	1	1	1	1	0	1	1	3	2	4	4	4	6	5	5	2	3	4	4	4	0	0	0	0
MA-00101-244	MA-00101-244	10	10	10		1	10	10	10	6	5	6	7	6	5	6	7	6	5	6	4	2	3	3	4	1	0	1	3	4	3	1	3	6	5	6	7	6	5	6	7	6	5	6	4	2	3	3	4
MA-00101-245	MA-00101-245	8	8	8		1	8	8	8	6	4	4	4	3	4	2	5	6	4	4	6	6	6	4	6	6	7	6	5	5	4	5	4	6	4	4	4	3	4	2	5	6	4	4	6	6	6	4	6
MA-00101-248	MA-00101-248	28	28	28		1	28	28	28	1	1	0	0	0	0	1	1	0	0	0	0	20	27	26	21	11	12	10	13	1	0	0	0	1	1	0	0	0	0	1	1	0	0	0	0	20	27	26	21
MA-00101-254	MA-00101-254	7	7	7		1	7	7	7	7	7	6	6	6	7	6	7	6	7	5	5	6	6	5	6	5	6	5	4	6	7	6	7	7	7	6	6	6	7	6	7	6	7	5	5	6	6	5	6
MA-00101-255	MA-00101-255	4	4	4		1	4	4	4	1	3	3	0	1	2	2	2	1	2	2	1	2	1	0	1	1	2	1	0	0	1	2	2	1	3	3	0	1	2	2	2	1	2	2	1	2	1	0	1
MA-00101-256	MA-00101-256	14	3	3		1	14	3	3	10	10	9	9	9	9	10	11	9	7	9	9	10	10	11	11	11	11	10	9	9	11	10	9	1	0	1	1	0	1	1	1	1	1	1	1	3	1	1	1
MA-00101-257	MA-00101-257	2	1	1		1	2	1	1	2	1	1	2	1	1	2	1	1	2	1	1	2	1	2	2	2	2	1	2	2	2	2	2	1	1	1	1	1	0	1	1	1	1	1	1	1	1	1	1
MA-00101-258	MA-00101-258	1	1	1		1	1	1	1	1	1	1	1	1	1	1	1	1	0	1	1	0	0	0	0	0	1	1	1	1	1	0	1	1	1	1	1	1	1	1	1	1	0	1	1	0	0	0	0
MA-00101-259	MA-00101-259	4	4	4		1	4	4	4	0	1	0	0	3	2	2	0	2	2	3	3	0	1	1	1	0	0	0	2	0	0	0	0	0	1	0	0	3	2	2	0	2	2	3	3	0	1	1	1
MA-00101-260	MA-00101-260	1	1	1		1	1	1	1	1	1	1	1	1	1	1	1	1	1	1	1	1	1	0	1	1	1	1	1	1	1	1	1	1	1	1	1	1	1	1	1	1	1	1	1	1	1	0	1
MA-00101-261	MA-00101-261	16	6	6		1	16	6	6	4	8	4	5	6	8	6	6	3	3	5	2	9	10	10	11	10	10	9	11	7	8	10	10	0	1	2	1	2	1	3	2	0	1	1	0	1	1	0	2
MA-00101-262	MA-00101-262	1	1	1		1	1	1	1	0	0	0	0	1	0	0	0	0	0	0	0	0	0	0	0	0	0	0	0	0	0	0	0	0	0	0	0	1	0	0	0	0	0	0	0	0	0	0	0
MA-00101-264	MA-00101-264	21	21	21		1	21	21	21	15	16	13	14	13	15	13	16	11	10	13	12	20	18	20	16	15	16	17	17	15	13	15	17	15	16	13	14	13	15	13	16	11	10	13	12	20	18	20	16
MA-00101-267	MA-00101-267	6	6	6		1	6	6	6	5	6	6	6	6	6	6	5	5	5	4	5	1	4	3	3	3	4	3	3	4	5	4	5	5	6	6	6	6	6	6	5	5	5	4	5	1	4	3	3
MA-00101-268	MA-00101-268	2	2	2		1	2	2	2	0	1	0	0	0	1	0	0	0	0	0	0	0	0	1	0	0	0	0	0	0	0	0	0	0	1	0	0	0	1	0	0	0	0	0	0	0	0	1	0
MA-00101-269	MA-00101-269	13	3	3		1	13	3	3	10	7	9	8	8	9	9	8	10	10	10	8	8	9	8	8	9	10	9	9	8	8	10	9	1	1	0	0	0	1	1	1	1	1	1	1	2	1	1	1
MA-00101-270	MA-00101-270	6	6	5		1	6	6	5	5	1	4	2	3	4	4	4	4	4	3	2	4	3	2	4	5	4	4	3	4	4	4	3	5	1	4	2	3	4	4	4	4	4	3	2	4	3	2	4
MA-00101-271	MA-00101-271	6	6	6		1	6	6	6	0	1	0	0	1	1	2	1	1	2	1	0	3	3	3	4	2	2	4	3	1	1	1	0	0	1	0	0	1	1	2	1	1	2	1	0	3	3	3	4
MA-00101-280	MA-00101-280	3	3	3		1	3	3	3	1	1	1	2	1	2	3	2	1	1	1	1	1	2	1	1	1	1	1	2	1	1	3	1	1	1	1	2	1	2	3	2	1	1	1	1	1	2	1	1
MA-00101-283	MA-00101-283	7	2	2		1	7	2	2	7	4	4	6	4	7	6	4	4	4	5	5	4	3	6	4	5	5	5	5	4	4	5	4	2	1	0	2	1	2	2	1	1	1	1	0	1	1	2	0
MA-00101-284	MA-00101-284	5	5	5		1	5	5	5	5	4	4	4	4	3	4	4	4	3	4	5	4	4	5	5	3	3	4	4	4	3	4	4	5	4	4	4	4	3	4	4	4	3	4	5	4	4	5	5
MA-00101-286	MA-00101-286	17	17	17		1	17	17	17	13	11	10	10	9	11	12	11	11	7	11	10	11	11	11	8	10	10	11	12	13	11	13	12	13	11	10	10	9	11	12	11	11	7	11	10	11	11	11	8
MA-00101-287	MA-00101-287	1	1	1		1	1	1	1	0	0	0	0	0	0	0	0	1	0	1	0	0	0	0	0	0	0	0	0	0	0	0	0	0	0	0	0	0	0	0	0	1	0	1	0	0	0	0	0
MA-00101-288	MA-00101-288	1	1	1		1	1	1	1	1	1	0	1	0	0	0	0	0	0	1	0	0	0	0	0	0	0	0	0	1	0	0	0	1	1	0	1	0	0	0	0	0	0	1	0	0	0	0	0
MA-00101-29	MA-00101-29	3	3	3		1	3	3	3	0	1	0	0	0	0	0	0	0	0	0	0	1	3	2	2	1	1	1	2	0	1	1	0	0	1	0	0	0	0	0	0	0	0	0	0	1	3	2	2
MA-00101-297;MA-00139-215	MA-00101-297	23;2	23;2	23;2		2	23	23	23	17	18	21	19	19	19	20	21	19	16	15	21	16	19	17	17	20	21	21	18	20	18	21	21	17	18	21	19	19	19	20	21	19	16	15	21	16	19	17	17
MA-00101-3	MA-00101-3	11	11	11		1	11	11	11	7	9	7	7	7	6	7	6	6	7	5	6	5	7	4	6	5	5	8	6	8	7	8	7	7	9	7	7	7	6	7	6	6	7	5	6	5	7	4	6
MA-00101-30	MA-00101-30	2	2	2		1	2	2	2	2	2	1	2	2	2	2	2	2	2	2	1	0	1	1	1	1	1	1	1	1	0	1	1	2	2	1	2	2	2	2	2	2	2	2	1	0	1	1	1
MA-00101-304;MA-00139-283	MA-00101-304	33;1	33;1	33;1		2	33	33	33	23	25	25	23	27	23	23	24	25	26	24	26	22	26	22	21	27	27	24	26	24	23	27	26	23	25	25	23	27	23	23	24	25	26	24	26	22	26	22	21
MA-00101-306	MA-00101-306	7	7	7		1	7	7	7	6	3	4	5	5	4	4	5	3	3	1	3	0	1	1	0	1	1	2	0	4	4	4	4	6	3	4	5	5	4	4	5	3	3	1	3	0	1	1	0
MA-00101-309	MA-00101-309	10	10	9		1	10	10	9	3	3	3	5	6	4	5	4	2	3	3	2	6	4	4	3	4	4	6	5	4	3	2	6	3	3	3	5	6	4	5	4	2	3	3	2	6	4	4	3
MA-00101-310	MA-00101-310	2	2	2		1	2	2	2	1	1	1	1	2	1	1	1	1	1	1	1	1	1	1	1	1	1	1	1	1	1	1	1	1	1	1	1	2	1	1	1	1	1	1	1	1	1	1	1
MA-00101-311	MA-00101-311	7	7	7		1	7	7	7	0	1	0	1	3	2	3	4	1	1	1	2	2	6	1	2	3	4	1	1	3	1	3	2	0	1	0	1	3	2	3	4	1	1	1	2	2	6	1	2
MA-00101-313	MA-00101-313	20	13	13		1	20	13	13	12	7	11	14	11	11	10	10	6	9	8	9	14	14	15	16	15	14	12	17	14	12	11	12	7	4	7	9	6	7	6	6	4	6	5	6	9	10	10	10
MA-00101-321	MA-00101-321	6	6	6		1	6	6	6	3	3	3	2	4	4	3	3	3	4	3	3	6	4	5	5	3	5	3	4	3	3	3	5	3	3	3	2	4	4	3	3	3	4	3	3	6	4	5	5
MA-00101-322	MA-00101-322	3	2	2		1	3	2	2	1	2	1	1	1	1	0	1	1	0	0	0	2	2	2	2	0	1	1	2	1	0	1	1	0	1	0	0	0	1	0	0	1	0	0	0	1	1	1	1
MA-00101-325	MA-00101-325	8	8	8		1	8	8	8	7	8	7	8	8	8	7	7	8	7	8	8	7	8	8	7	8	8	8	8	8	8	7	7	7	8	7	8	8	8	7	7	8	7	8	8	7	8	8	7
MA-00101-326	MA-00101-326	1	1	1		1	1	1	1	1	0	1	1	1	1	1	1	1	1	1	1	1	0	0	0	1	0	1	0	0	1	1	0	1	0	1	1	1	1	1	1	1	1	1	1	1	0	0	0
MA-00101-327	MA-00101-327	3	3	3		1	3	3	3	0	0	0	0	0	0	0	1	1	3	1	0	0	0	0	0	0	0	0	0	0	0	0	0	0	0	0	0	0	0	0	1	1	3	1	0	0	0	0	0
MA-00101-329	MA-00101-329	4	4	4		1	4	4	4	0	0	0	1	0	0	1	0	0	0	0	0	1	2	2	2	1	1	1	3	0	0	1	0	0	0	0	1	0	0	1	0	0	0	0	0	1	2	2	2
MA-00101-330	MA-00101-330	4	4	4		1	4	4	4	4	3	1	4	2	2	1	3	0	0	1	1	1	2	3	2	4	1	2	2	4	3	4	2	4	3	1	4	2	2	1	3	0	0	1	1	1	2	3	2
MA-00101-333	MA-00101-333	4	4	4		1	4	4	4	4	3	4	4	3	4	3	4	4	4	4	2	2	3	3	2	2	2	2	2	3	3	3	4	4	3	4	4	3	4	3	4	4	4	4	2	2	3	3	2
MA-00101-334	MA-00101-334	4	4	4		1	4	4	4	1	1	0	2	1	2	2	1	2	1	2	1	3	4	4	4	2	2	3	2	2	1	1	0	1	1	0	2	1	2	2	1	2	1	2	1	3	4	4	4
MA-00101-337	MA-00101-337	5	5	5		1	5	5	5	3	3	3	3	2	3	3	3	2	2	3	3	3	4	3	2	3	3	3	4	3	3	3	3	3	3	3	3	2	3	3	3	2	2	3	3	3	4	3	2
MA-00101-338	MA-00101-338	11	11	11		1	11	11	11	8	9	10	9	8	8	8	8	8	8	9	10	9	8	7	9	9	8	7	10	9	10	9	9	8	9	10	9	8	8	8	8	8	8	9	10	9	8	7	9
MA-00101-344	MA-00101-344	4	4	4		1	4	4	4	3	3	0	3	3	2	2	3	1	1	1	1	0	3	2	1	0	0	1	2	3	2	1	4	3	3	0	3	3	2	2	3	1	1	1	1	0	3	2	1
MA-00101-350	MA-00101-350	12	12	12		1	12	12	12	9	11	9	10	10	9	10	10	10	10	9	12	7	10	9	9	10	9	10	9	11	8	9	9	9	11	9	10	10	9	10	10	10	10	9	12	7	10	9	9
MA-00101-351	MA-00101-351	7	7	7		1	7	7	7	5	4	5	5	3	4	4	5	3	2	4	4	4	7	5	5	4	5	4	5	2	5	6	5	5	4	5	5	3	4	4	5	3	2	4	4	4	7	5	5
MA-00101-357	MA-00101-357	2	2	2		1	2	2	2	1	0	0	0	1	0	1	0	0	0	0	1	0	0	1	1	1	0	1	0	0	0	0	0	1	0	0	0	1	0	1	0	0	0	0	1	0	0	1	1
MA-00101-358	MA-00101-358	4	4	4		1	4	4	4	3	1	1	2	2	1	2	2	2	1	3	3	1	3	1	1	1	1	2	1	2	2	2	2	3	1	1	2	2	1	2	2	2	1	3	3	1	3	1	1
MA-00101-360	MA-00101-360	25	25	6		1	25	25	6	22	25	24	23	24	25	24	23	23	21	23	22	23	24	23	22	24	24	25	25	23	23	24	24	22	25	24	23	24	25	24	23	23	21	23	22	23	24	23	22
MA-00101-361;MA-00153-447	MA-00101-361	3;1	3;1	3;1		2	3	3	3	3	3	3	2	3	3	3	1	2	2	2	2	2	3	1	1	2	1	2	2	3	2	2	3	3	3	3	2	3	3	3	1	2	2	2	2	2	3	1	1
MA-00101-364	MA-00101-364	15	15	15		1	15	15	15	11	12	14	10	11	12	12	12	11	12	12	12	11	10	12	9	11	11	11	10	10	10	11	12	11	12	14	10	11	12	12	12	11	12	12	12	11	10	12	9
MA-00101-37	MA-00101-37	11	11	11		1	11	11	11	6	6	5	4	5	5	5	7	4	6	4	4	4	7	6	5	6	5	7	8	4	6	8	6	6	6	5	4	5	5	5	7	4	6	4	4	4	7	6	5
MA-00101-374	MA-00101-374	10	10	10		1	10	10	10	8	8	6	8	7	7	10	4	6	7	7	7	9	6	6	6	6	6	8	8	6	5	6	6	8	8	6	8	7	7	10	4	6	7	7	7	9	6	6	6
MA-00101-382	MA-00101-382	1	1	1		1	1	1	1	1	1	1	1	1	1	1	1	1	1	1	1	0	1	1	0	1	1	1	1	1	1	1	1	1	1	1	1	1	1	1	1	1	1	1	1	0	1	1	0
MA-00101-385	MA-00101-385	13	13	13		1	13	13	13	7	4	6	8	7	7	9	7	8	3	5	4	1	3	4	3	6	7	5	6	7	8	7	7	7	4	6	8	7	7	9	7	8	3	5	4	1	3	4	3
MA-00101-392	MA-00101-392	3	3	3		1	3	3	3	1	1	1	1	1	1	1	1	1	1	2	2	0	1	1	1	1	1	1	1	1	1	1	1	1	1	1	1	1	1	1	1	1	1	2	2	0	1	1	1
MA-00101-393	MA-00101-393	4	4	4		1	4	4	4	1	2	1	1	1	1	1	0	0	0	0	0	2	1	1	2	1	2	2	2	1	2	2	2	1	2	1	1	1	1	1	0	0	0	0	0	2	1	1	2
MA-00101-394	MA-00101-394	2	2	2		1	2	2	2	0	0	0	0	0	0	0	0	0	0	1	0	1	2	1	0	0	1	0	2	0	0	0	0	0	0	0	0	0	0	0	0	0	0	1	0	1	2	1	0
MA-00101-398	MA-00101-398	16	16	10		1	16	16	10	11	11	11	12	12	12	10	12	11	12	13	14	13	13	12	10	15	14	13	13	12	10	12	13	11	11	11	12	12	12	10	12	11	12	13	14	13	13	12	10
MA-00101-40	MA-00101-40	5	5	5		1	5	5	5	3	4	3	4	3	4	4	3	4	4	4	3	3	4	4	4	3	4	3	4	4	4	4	2	3	4	3	4	3	4	4	3	4	4	4	3	3	4	4	4
MA-00101-405	MA-00101-405	5	4	3		1	5	4	3	5	3	3	2	2	3	2	2	2	2	2	2	2	1	3	3	3	3	5	3	5	2	5	3	4	2	2	1	1	2	1	1	1	1	1	1	2	1	2	2
MA-00101-406	MA-00101-406	3	3	3		1	3	3	3	1	1	1	1	2	2	2	1	1	1	1	1	1	0	0	0	1	0	0	1	1	0	2	1	1	1	1	1	2	2	2	1	1	1	1	1	1	0	0	0
MA-00101-407	MA-00101-407	26	26	16		1	26	26	16	20	20	15	19	21	22	19	22	14	16	18	16	15	18	21	16	20	21	19	19	20	19	19	17	20	20	15	19	21	22	19	22	14	16	18	16	15	18	21	16
MA-00182-23;MA-00101-408	MA-00182-23;MA-00101-408	4;4	4;4	4;4	;	2	4	4	4	3	2	1	1	3	3	3	1	3	3	3	4	4	3	4	3	3	4	4	2	2	1	2	2	3	2	1	1	3	3	3	1	3	3	3	4	4	3	4	3
MA-00101-410	MA-00101-410	15	15	13		1	15	15	13	13	14	13	12	14	12	13	13	14	13	13	13	15	15	15	15	15	15	15	15	14	14	14	13	13	14	13	12	14	12	13	13	14	13	13	13	15	15	15	15
MA-00101-415	MA-00101-415	2	2	2		1	2	2	2	1	0	2	1	1	0	1	0	2	1	2	2	0	0	0	0	0	0	0	0	0	1	1	1	1	0	2	1	1	0	1	0	2	1	2	2	0	0	0	0
MA-00101-419	MA-00101-419	8	8	8		1	8	8	8	3	3	4	3	3	3	6	3	3	5	5	4	2	2	2	1	2	1	2	2	2	2	3	4	3	3	4	3	3	3	6	3	3	5	5	4	2	2	2	1
MA-00101-420	MA-00101-420	11	11	11		1	11	11	11	8	6	8	7	8	9	9	7	7	6	8	10	2	3	4	3	6	6	5	6	7	5	6	7	8	6	8	7	8	9	9	7	7	6	8	10	2	3	4	3
MA-00101-43	MA-00101-43	4	4	4		1	4	4	4	3	1	1	1	3	0	2	2	2	0	1	1	3	3	3	2	1	3	3	2	3	3	2	1	3	1	1	1	3	0	2	2	2	0	1	1	3	3	3	2
MA-00101-438	MA-00101-438	17	17	17		1	17	17	17	11	14	12	13	14	12	14	13	10	12	11	9	13	13	12	11	14	11	12	13	13	14	14	13	11	14	12	13	14	12	14	13	10	12	11	9	13	13	12	11
MA-00101-439	MA-00101-439	2	2	2		1	2	2	2	1	1	0	1	0	1	0	2	0	0	2	0	2	1	2	1	2	1	0	1	1	2	1	0	1	1	0	1	0	1	0	2	0	0	2	0	2	1	2	1
MA-00101-44	MA-00101-44	8	8	8		1	8	8	8	8	8	7	8	7	7	6	8	7	6	7	6	2	1	2	2	4	3	2	2	6	6	4	5	8	8	7	8	7	7	6	8	7	6	7	6	2	1	2	2
MA-00101-440	MA-00101-440	4	4	4		1	4	4	4	1	2	0	1	3	2	3	1	0	1	1	0	1	1	1	0	0	1	2	1	2	1	1	1	1	2	0	1	3	2	3	1	0	1	1	0	1	1	1	0
MA-00101-444	MA-00101-444	1	1	1		1	1	1	1	0	0	1	0	1	0	0	0	1	1	1	1	0	0	0	0	1	0	0	0	0	0	0	0	0	0	1	0	1	0	0	0	1	1	1	1	0	0	0	0
MA-00101-445	MA-00101-445	2	1	1		1	2	1	1	1	1	2	1	2	1	1	2	1	2	1	1	1	1	1	2	1	1	2	1	1	1	1	1	0	0	1	0	1	0	0	1	0	1	0	0	0	0	0	1
MA-00101-45	MA-00101-45	1	1	1		1	1	1	1	0	1	0	0	1	1	0	0	0	0	0	0	1	0	1	0	1	1	1	1	1	1	0	0	0	1	0	0	1	1	0	0	0	0	0	0	1	0	1	0
MA-00101-451	MA-00101-451	2	2	2		1	2	2	2	0	0	0	0	1	0	1	0	0	0	1	0	0	0	0	0	0	0	0	0	0	0	1	0	0	0	0	0	1	0	1	0	0	0	1	0	0	0	0	0
MA-00101-455	MA-00101-455	4	4	4		1	4	4	4	3	3	2	3	2	2	3	3	3	3	3	3	4	3	2	3	3	3	3	3	3	3	3	2	3	3	2	3	2	2	3	3	3	3	3	3	4	3	2	3
MA-00153-459;MA-00101-456;MA-00210-105	MA-00153-459;MA-00101-456	11;11;1	11;11;1	9;9;0	;	3	11	11	9	9	10	9	9	11	11	10	11	11	10	9	10	10	9	10	10	10	9	10	10	10	9	10	10	9	10	9	9	11	11	10	11	11	10	9	10	10	9	10	10
MA-00101-457	MA-00101-457	2	2	2		1	2	2	2	1	2	2	1	2	1	2	2	1	2	0	1	1	1	2	1	2	1	1	2	2	1	1	2	1	2	2	1	2	1	2	2	1	2	0	1	1	1	2	1
MA-00101-458	MA-00101-458	1	1	1		1	1	1	1	1	1	0	0	1	0	1	1	0	0	1	0	1	0	0	0	0	0	1	0	1	1	1	1	1	1	0	0	1	0	1	1	0	0	1	0	1	0	0	0
MA-00101-461	MA-00101-461	3	3	3		1	3	3	3	3	3	3	3	3	3	3	2	3	3	3	3	1	2	3	3	3	3	2	2	3	3	2	3	3	3	3	3	3	3	3	2	3	3	3	3	1	2	3	3
MA-00101-462	MA-00101-462	12	12	12		1	12	12	12	8	8	4	7	7	9	10	6	4	5	7	7	6	10	7	8	9	10	9	9	7	6	6	5	8	8	4	7	7	9	10	6	4	5	7	7	6	10	7	8
MA-00101-467	MA-00101-467	2	2	2		1	2	2	2	0	1	0	1	0	0	0	1	0	0	1	0	0	0	0	0	0	0	0	0	0	0	0	0	0	1	0	1	0	0	0	1	0	0	1	0	0	0	0	0
MA-00101-468	MA-00101-468	5	5	3		1	5	5	3	3	2	3	2	2	3	2	3	3	4	3	3	4	4	4	4	3	3	5	4	4	2	3	4	3	2	3	2	2	3	2	3	3	4	3	3	4	4	4	4
MA-00101-480	MA-00101-480	5	5	5		1	5	5	5	1	0	0	3	1	2	3	0	4	3	5	5	2	2	1	2	4	3	2	2	0	3	2	0	1	0	0	3	1	2	3	0	4	3	5	5	2	2	1	2
MA-00101-482	MA-00101-482	22	22	22		1	22	22	22	6	12	8	10	7	10	9	10	7	5	7	5	13	10	14	9	8	13	8	12	10	8	11	12	6	12	8	10	7	10	9	10	7	5	7	5	13	10	14	9
MA-00101-484	MA-00101-484	1	1	1		1	1	1	1	1	1	1	1	1	0	1	1	1	1	1	0	0	0	1	1	1	1	1	1	1	1	1	0	1	1	1	1	1	0	1	1	1	1	1	0	0	0	1	1
MA-00101-485	MA-00101-485	4	4	4		1	4	4	4	1	1	1	2	3	1	2	2	2	1	1	0	0	0	0	0	2	1	0	0	1	2	1	1	1	1	1	2	3	1	2	2	2	1	1	0	0	0	0	0
MA-00101-486	MA-00101-486	34	34	21		1	34	34	21	17	13	15	17	19	14	15	16	15	16	15	16	28	30	31	26	27	24	24	30	19	18	22	20	17	13	15	17	19	14	15	16	15	16	15	16	28	30	31	26
MA-00101-495	MA-00101-495	7	7	7		1	7	7	7	6	4	3	6	5	5	6	4	4	4	3	3	5	2	2	2	2	2	3	5	4	6	5	5	6	4	3	6	5	5	6	4	4	4	3	3	5	2	2	2
MA-00101-497	MA-00101-497	2	2	2		1	2	2	2	0	0	0	0	1	2	1	0	0	0	0	0	0	0	0	0	0	0	0	0	0	0	0	0	0	0	0	0	1	2	1	0	0	0	0	0	0	0	0	0
MA-00101-499	MA-00101-499	6	6	5		1	6	6	5	2	3	2	3	2	4	1	1	2	1	2	0	4	3	4	3	3	4	3	3	5	3	4	4	2	3	2	3	2	4	1	1	2	1	2	0	4	3	4	3
MA-00101-502;MA-00153-354	MA-00101-502	7;1	7;1	7;1		2	7	7	7	7	7	7	7	7	7	7	7	7	7	7	7	4	2	1	0	4	5	3	5	6	7	6	6	7	7	7	7	7	7	7	7	7	7	7	7	4	2	1	0
MA-00101-51	MA-00101-51	17	17	17		1	17	17	17	12	14	12	13	14	12	15	14	13	11	12	14	7	8	8	8	12	7	9	8	13	11	11	12	12	14	12	13	14	12	15	14	13	11	12	14	7	8	8	8
MA-00101-510	MA-00101-510	27	27	27		1	27	27	27	18	22	19	21	20	21	18	17	15	17	16	17	16	18	16	15	15	16	17	17	18	18	20	16	18	22	19	21	20	21	18	17	15	17	16	17	16	18	16	15
MA-00101-514	MA-00101-514	3	2	2		1	3	2	2	0	1	0	1	0	1	0	0	1	1	2	2	1	1	1	1	1	1	1	1	1	3	2	1	0	0	0	1	0	0	0	0	0	0	1	1	0	0	0	0
MA-00101-518	MA-00101-518	6	6	6		1	6	6	6	2	4	1	2	3	2	2	3	1	1	1	1	1	3	3	2	0	1	3	2	2	1	3	1	2	4	1	2	3	2	2	3	1	1	1	1	1	3	3	2
MA-00101-521;MA-00153-415;MA-00259-1	MA-00101-521;MA-00153-415;MA-00259-1	8;6;5	8;6;5	8;6;5	;;	3	8	8	8	3	4	5	2	4	5	2	3	4	3	3	5	4	3	4	5	2	4	3	3	4	4	3	4	3	4	5	2	4	5	2	3	4	3	3	5	4	3	4	5
MA-00101-53	MA-00101-53	6	6	6		1	6	6	6	4	6	2	2	5	4	3	3	3	2	1	4	2	3	3	1	3	3	3	3	5	3	3	2	4	6	2	2	5	4	3	3	3	2	1	4	2	3	3	1
MA-00101-530	MA-00101-530	21	21	21		1	21	21	21	16	15	15	16	17	16	16	15	13	14	15	14	17	15	14	13	13	17	16	16	14	16	14	16	16	15	15	16	17	16	16	15	13	14	15	14	17	15	14	13
MA-00101-532	MA-00101-532	9	9	9		1	9	9	9	3	6	4	4	4	5	4	5	3	4	3	3	4	4	3	3	6	5	6	3	3	5	6	5	3	6	4	4	4	5	4	5	3	4	3	3	4	4	3	3
MA-00101-533;MA-00055-51	MA-00101-533	10;3	10;3	10;3		2	10	10	10	4	5	2	4	3	5	2	3	0	1	1	1	6	8	8	7	4	4	5	4	4	4	5	5	4	5	2	4	3	5	2	3	0	1	1	1	6	8	8	7
MA-00101-534	MA-00101-534	2	2	2		1	2	2	2	0	0	0	1	0	0	1	0	0	0	0	0	1	1	2	2	0	0	2	1	0	1	1	0	0	0	0	1	0	0	1	0	0	0	0	0	1	1	2	2
MA-00101-535	MA-00101-535	3	3	3		1	3	3	3	2	2	0	2	2	2	2	1	2	2	2	2	1	2	2	2	2	3	1	1	0	0	0	0	2	2	0	2	2	2	2	1	2	2	2	2	1	2	2	2
MA-00101-537	MA-00101-537	3	3	3		1	3	3	3	3	3	2	2	2	2	2	2	0	3	2	3	2	2	2	2	3	3	2	3	1	3	3	2	3	3	2	2	2	2	2	2	0	3	2	3	2	2	2	2
MA-00153-423;MA-00101-538	MA-00153-423;MA-00101-538	12;12	12;12	12;12	;	2	12	12	12	10	9	10	10	10	10	11	10	10	9	9	10	11	10	10	10	10	9	10	11	11	9	9	8	10	9	10	10	10	10	11	10	10	9	9	10	11	10	10	10
MA-00101-539	MA-00101-539	12	12	12		1	12	12	12	5	9	6	6	7	6	9	7	7	6	7	4	7	5	6	5	7	4	6	6	7	5	8	6	5	9	6	6	7	6	9	7	7	6	7	4	7	5	6	5
MA-00101-542	MA-00101-542	18	18	15		1	18	18	15	13	10	12	15	14	12	12	14	12	12	12	10	6	8	8	8	8	12	9	13	12	11	13	11	13	10	12	15	14	12	12	14	12	12	12	10	6	8	8	8
MA-00101-543	MA-00101-543	4	4	4		1	4	4	4	2	2	2	4	2	3	3	3	4	4	4	3	1	0	0	0	0	0	0	0	3	2	3	2	2	2	2	4	2	3	3	3	4	4	4	3	1	0	0	0
MA-00101-545	MA-00101-545	11	11	11		1	11	11	11	6	8	5	7	6	8	6	7	5	3	5	6	2	3	6	2	1	6	1	3	6	4	5	8	6	8	5	7	6	8	6	7	5	3	5	6	2	3	6	2
MA-00101-547	MA-00101-547	1	1	1		1	1	1	1	0	0	1	0	1	1	1	1	1	1	0	1	1	1	1	1	1	1	1	1	1	1	1	1	0	0	1	0	1	1	1	1	1	1	0	1	1	1	1	1
MA-00101-550	MA-00101-550	8	8	8		1	8	8	8	2	1	3	3	4	4	5	2	1	2	1	5	6	7	5	6	5	8	6	7	2	3	1	2	2	1	3	3	4	4	5	2	1	2	1	5	6	7	5	6
MA-00101-551	MA-00101-551	9	9	9		1	9	9	9	3	2	2	2	4	2	2	3	4	2	5	6	4	4	5	4	7	4	5	6	3	4	5	3	3	2	2	2	4	2	2	3	4	2	5	6	4	4	5	4
MA-00101-559	MA-00101-559	6	6	6		1	6	6	6	4	3	1	2	4	5	4	5	2	1	1	3	2	5	3	2	4	3	4	6	4	5	5	6	4	3	1	2	4	5	4	5	2	1	1	3	2	5	3	2
MA-00101-560	MA-00101-560	3	3	3		1	3	3	3	1	2	1	3	2	3	2	3	2	1	2	3	1	2	2	1	2	1	1	2	3	3	2	3	1	2	1	3	2	3	2	3	2	1	2	3	1	2	2	1
MA-00101-563;MA-00139-144	MA-00101-563;MA-00139-144	6;4	6;4	6;4	;	2	6	6	6	4	6	6	5	6	6	6	5	6	5	6	5	4	6	6	6	4	6	6	6	6	5	5	5	4	6	6	5	6	6	6	5	6	5	6	5	4	6	6	6
MA-00101-572	MA-00101-572	6	6	6		1	6	6	6	2	2	1	4	1	2	2	2	2	3	4	1	3	0	4	2	4	4	1	4	3	4	3	3	2	2	1	4	1	2	2	2	2	3	4	1	3	0	4	2
MA-00101-578	MA-00101-578	12	8	8		1	12	8	8	9	10	6	9	7	8	7	7	6	6	7	7	6	5	5	4	7	7	5	9	7	9	6	8	6	6	3	5	4	5	4	4	4	3	4	5	2	1	1	1
MA-00101-58	MA-00101-58	12	10	10		1	12	10	10	3	5	2	4	4	4	6	4	4	6	4	4	6	10	10	7	5	7	9	10	3	6	4	5	3	5	2	4	3	2	4	4	3	5	4	4	5	8	8	6
MA-00101-584	MA-00101-584	20	20	20		1	20	20	20	13	11	13	12	13	12	14	13	13	8	10	11	9	17	15	11	13	13	15	17	14	13	10	14	13	11	13	12	13	12	14	13	13	8	10	11	9	17	15	11
MA-00101-586	MA-00101-586	1	1	1		1	1	1	1	1	0	0	1	1	0	0	1	0	0	0	0	0	0	0	0	0	0	0	0	1	1	1	1	1	0	0	1	1	0	0	1	0	0	0	0	0	0	0	0
MA-00101-587	MA-00101-587	21	21	21		1	21	21	21	11	12	13	12	12	13	14	13	11	10	12	14	15	18	18	20	16	18	17	18	13	14	13	12	11	12	13	12	12	13	14	13	11	10	12	14	15	18	18	20
MA-00101-591	MA-00101-591	6	6	6		1	6	6	6	1	1	2	2	2	3	2	3	3	3	2	4	3	3	2	0	2	4	2	3	4	2	4	2	1	1	2	2	2	3	2	3	3	3	2	4	3	3	2	0
MA-00101-592	MA-00101-592	8	8	8		1	8	8	8	2	4	2	1	2	2	3	2	2	2	2	1	2	4	3	2	3	5	5	3	1	2	2	4	2	4	2	1	2	2	3	2	2	2	2	1	2	4	3	2
MA-00101-593	MA-00101-593	1	1	1		1	1	1	1	1	1	1	1	1	1	1	1	0	1	0	0	1	1	1	0	1	1	1	1	1	1	1	1	1	1	1	1	1	1	1	1	0	1	0	0	1	1	1	0
MA-00101-594	MA-00101-594	11	11	10		1	11	11	10	2	2	1	4	1	3	2	2	0	2	1	1	7	10	10	8	9	9	8	9	2	2	4	2	2	2	1	4	1	3	2	2	0	2	1	1	7	10	10	8
MA-00101-595	MA-00101-595	8	7	7		1	8	7	7	2	1	2	2	1	2	1	2	1	3	0	1	7	6	5	6	4	4	4	5	3	1	2	2	1	0	1	1	1	1	1	1	1	2	0	1	6	5	4	5
MA-00101-596	MA-00101-596	2	2	2		1	2	2	2	1	2	2	1	0	1	1	2	2	2	2	2	1	0	1	0	1	1	1	0	1	1	2	1	1	2	2	1	0	1	1	2	2	2	2	2	1	0	1	0
MA-00101-598	MA-00101-598	25	25	25		1	25	25	25	11	8	9	12	11	13	11	13	7	12	9	13	15	13	13	11	11	14	10	14	15	14	17	15	11	8	9	12	11	13	11	13	7	12	9	13	15	13	13	11
MA-00101-599	MA-00101-599	1	1	1		1	1	1	1	1	0	1	1	1	1	1	1	0	0	0	1	0	1	1	0	0	0	1	1	0	0	1	1	1	0	1	1	1	1	1	1	0	0	0	1	0	1	1	0
MA-00101-6	MA-00101-6	3	3	3		1	3	3	3	1	1	1	0	1	1	1	0	1	1	1	2	2	2	1	1	0	1	0	1	1	1	1	1	1	1	1	0	1	1	1	0	1	1	1	2	2	2	1	1
MA-00101-60	MA-00101-60	8	5	5		1	8	5	5	3	3	2	4	4	2	3	3	2	2	3	4	4	6	7	7	6	5	4	4	2	3	3	2	1	0	1	1	1	1	1	0	0	0	0	1	2	3	4	4
MA-00101-605	MA-00101-605	2	2	2		1	2	2	2	0	0	0	0	0	0	2	0	0	0	0	0	0	0	0	0	0	0	0	0	0	0	0	0	0	0	0	0	0	0	2	0	0	0	0	0	0	0	0	0
MA-00101-608	MA-00101-608	2	2	2		1	2	2	2	0	0	0	1	1	0	0	0	1	0	0	1	1	2	2	2	1	0	0	1	0	0	1	0	0	0	0	1	1	0	0	0	1	0	0	1	1	2	2	2
MA-00101-610	MA-00101-610	16	16	16		1	16	16	16	5	5	2	5	7	6	2	3	3	4	3	5	11	12	11	9	7	8	8	8	6	6	5	6	5	5	2	5	7	6	2	3	3	4	3	5	11	12	11	9
MA-00101-611	MA-00101-611	2	2	2		1	2	2	2	2	0	1	2	1	1	1	0	1	2	1	1	1	2	1	2	1	2	1	1	0	2	1	1	2	0	1	2	1	1	1	0	1	2	1	1	1	2	1	2
MA-00101-616	MA-00101-616	2	2	2		1	2	2	2	1	1	1	1	1	1	1	1	1	1	1	1	2	1	1	1	1	1	1	1	2	2	1	1	1	1	1	1	1	1	1	1	1	1	1	1	2	1	1	1
MA-00101-617	MA-00101-617	9	9	9		1	9	9	9	8	7	5	7	6	7	6	5	5	3	4	3	4	6	5	4	6	4	6	7	7	7	8	7	8	7	5	7	6	7	6	5	5	3	4	3	4	6	5	4
MA-00101-618	MA-00101-618	7	7	7		1	7	7	7	7	7	7	7	7	5	7	7	6	6	6	7	6	7	7	5	7	6	7	7	7	6	7	6	7	7	7	7	7	5	7	7	6	6	6	7	6	7	7	5
MA-00101-619	MA-00101-619	14	14	14		1	14	14	14	11	10	10	9	11	11	10	10	12	8	11	11	10	11	11	9	12	11	12	11	12	11	13	11	11	10	10	9	11	11	10	10	12	8	11	11	10	11	11	9
MA-00101-620	MA-00101-620	17	17	17		1	17	17	17	15	15	17	16	15	15	15	16	15	16	15	15	14	15	14	14	14	15	16	16	15	15	15	15	15	15	17	16	15	15	15	16	15	16	15	15	14	15	14	14
MA-00101-621	MA-00101-621	3	2	2		1	3	2	2	1	0	1	1	1	2	1	1	1	0	1	1	2	1	1	3	2	1	1	1	1	1	0	1	0	0	0	0	0	1	0	0	0	0	0	0	1	0	0	2
MA-00101-622	MA-00101-622	11	6	6		1	11	6	6	6	4	7	6	5	6	8	5	5	6	5	7	6	4	7	3	3	6	3	4	6	4	5	4	3	1	4	4	3	3	5	2	3	4	3	4	1	1	3	0
MA-00101-624	MA-00101-624	11	11	11		1	11	11	11	7	7	8	8	7	6	7	8	7	5	8	9	9	9	10	10	8	7	9	7	6	7	8	7	7	7	8	8	7	6	7	8	7	5	8	9	9	9	10	10
MA-00101-628	MA-00101-628	4	4	4		1	4	4	4	4	4	3	3	2	3	3	3	2	1	1	2	3	4	4	4	4	3	4	4	4	3	4	4	4	4	3	3	2	3	3	3	2	1	1	2	3	4	4	4
MA-00101-630	MA-00101-630	10	2	2		1	10	2	2	5	7	5	5	7	7	7	6	5	5	5	7	7	8	8	8	7	6	7	8	7	5	6	7	0	1	0	0	1	1	1	1	0	0	0	1	1	1	2	1
MA-00101-637	MA-00101-637	3	2	2		1	3	2	2	1	2	0	1	1	2	1	2	2	2	2	1	3	3	3	3	3	3	3	3	2	2	2	1	0	1	0	0	0	1	0	1	1	1	1	0	2	2	2	2
MA-00101-640	MA-00101-640	1	1	1		1	1	1	1	1	1	0	1	1	1	1	1	1	1	1	1	0	0	0	0	0	1	1	1	0	1	1	1	1	1	0	1	1	1	1	1	1	1	1	1	0	0	0	0
MA-00101-65	MA-00101-65	7	7	7		1	7	7	7	2	0	2	4	1	1	2	2	2	2	1	3	0	3	2	0	1	3	2	4	2	3	3	2	2	0	2	4	1	1	2	2	2	2	1	3	0	3	2	0
MA-00101-652	MA-00101-652	28	28	28		1	28	28	28	19	21	20	20	21	24	22	23	22	23	23	24	20	22	21	20	20	19	21	22	21	19	20	21	19	21	20	20	21	24	22	23	22	23	23	24	20	22	21	20
MA-00101-653	MA-00101-653	2	2	2		1	2	2	2	1	1	0	0	0	0	0	1	0	0	0	0	0	0	1	1	1	1	0	0	0	1	0	1	1	1	0	0	0	0	0	1	0	0	0	0	0	0	1	1
MA-00101-658	MA-00101-658	4	4	4		1	4	4	4	2	2	1	3	2	3	3	2	2	2	2	1	1	2	2	1	2	2	1	3	2	2	3	2	2	2	1	3	2	3	3	2	2	2	2	1	1	2	2	1
MA-00101-66	MA-00101-66	2	2	2		1	2	2	2	1	1	1	1	1	2	1	1	1	1	2	1	1	1	1	2	1	1	1	1	2	2	1	1	1	1	1	1	1	2	1	1	1	1	2	1	1	1	1	2
MA-00101-660	MA-00101-660	2	2	2		1	2	2	2	1	1	1	0	0	1	1	1	0	0	2	1	0	0	0	0	1	0	0	1	0	1	2	2	1	1	1	0	0	1	1	1	0	0	2	1	0	0	0	0
MA-00101-665	MA-00101-665	13	13	13		1	13	13	13	7	7	7	7	7	5	8	8	6	6	5	6	7	7	9	7	6	7	5	9	6	7	8	5	7	7	7	7	7	5	8	8	6	6	5	6	7	7	9	7
MA-00101-668	MA-00101-668	24	24	24		1	24	24	24	21	21	22	22	20	22	21	21	19	20	20	18	21	24	24	24	23	24	24	24	22	24	24	24	21	21	22	22	20	22	21	21	19	20	20	18	21	24	24	24
MA-00101-67	MA-00101-67	2	2	2		1	2	2	2	1	1	1	1	2	2	1	2	0	1	1	1	1	1	1	1	0	0	1	2	0	1	1	0	1	1	1	1	2	2	1	2	0	1	1	1	1	1	1	1
MA-00101-676	MA-00101-676	7	7	7		1	7	7	7	4	4	4	5	3	4	6	4	4	5	5	3	6	6	6	7	6	5	6	5	4	5	4	4	4	4	4	5	3	4	6	4	4	5	5	3	6	6	6	7
MA-00101-677	MA-00101-677	5	5	5		1	5	5	5	3	1	2	1	3	3	2	3	2	4	1	2	4	3	3	3	4	3	4	4	4	2	4	3	3	1	2	1	3	3	2	3	2	4	1	2	4	3	3	3
MA-00101-683	MA-00101-683	6	6	6		1	6	6	6	3	5	5	4	5	4	3	5	3	3	3	4	4	6	5	5	4	5	4	6	4	5	4	5	3	5	5	4	5	4	3	5	3	3	3	4	4	6	5	5
MA-00101-696	MA-00101-696	5	5	5		1	5	5	5	4	2	2	3	3	3	4	2	3	2	3	4	3	3	3	3	3	5	4	5	3	4	3	4	4	2	2	3	3	3	4	2	3	2	3	4	3	3	3	3
MA-00101-73	MA-00101-73	1	1	1		1	1	1	1	0	1	0	1	0	0	1	1	0	1	1	1	1	1	1	0	1	1	0	1	1	1	0	0	0	1	0	1	0	0	1	1	0	1	1	1	1	1	1	0
MA-00101-77	MA-00101-77	49	49	39		1	49	49	39	36	38	35	34	38	37	35	34	36	31	35	32	45	46	42	40	41	41	42	40	38	40	41	40	36	38	35	34	38	37	35	34	36	31	35	32	45	46	42	40
MA-00101-78	MA-00101-78	3	3	3		1	3	3	3	1	2	2	2	2	2	1	0	2	0	2	2	3	2	1	2	2	1	1	1	2	1	3	1	1	2	2	2	2	2	1	0	2	0	2	2	3	2	1	2
MA-00101-79	MA-00101-79	4	4	4		1	4	4	4	3	3	3	3	3	2	2	3	1	3	1	3	3	1	2	2	4	2	4	2	1	3	2	2	3	3	3	3	3	2	2	3	1	3	1	3	3	1	2	2
MA-00101-8	MA-00101-8	3	3	3		1	3	3	3	2	1	2	1	3	1	2	1	0	1	0	1	0	1	1	0	1	1	2	2	1	1	1	2	2	1	2	1	3	1	2	1	0	1	0	1	0	1	1	0
MA-00101-84	MA-00101-84	20	20	20		1	20	20	20	19	19	18	18	17	18	19	19	17	18	17	18	13	12	11	12	15	14	14	13	15	17	16	16	19	19	18	18	17	18	19	19	17	18	17	18	13	12	11	12
MA-00101-88	MA-00101-88	1	1	1		1	1	1	1	0	0	0	0	1	0	0	1	0	0	0	1	1	1	0	0	1	1	0	1	0	0	0	1	0	0	0	0	1	0	0	1	0	0	0	1	1	1	0	0
MA-00101-89	MA-00101-89	4	4	4		1	4	4	4	2	3	1	2	1	0	2	0	1	2	0	2	4	2	3	2	3	4	3	2	3	3	4	1	2	3	1	2	1	0	2	0	1	2	0	2	4	2	3	2
MA-00102-3;MA-00189-408	MA-00102-3;MA-00189-408	3;3	3;3	3;3	;	2	3	3	3	3	2	3	3	3	3	3	1	3	2	3	2	1	3	1	3	1	2	3	2	3	3	3	2	3	2	3	3	3	3	3	1	3	2	3	2	1	3	1	3
MA-00106-1	MA-00106-1	16	16	12		1	16	16	12	16	15	16	16	15	16	16	14	16	15	16	16	0	1	1	1	5	6	3	7	12	12	16	12	16	15	16	16	15	16	16	14	16	15	16	16	0	1	1	1
MA-00108-2	MA-00108-2	1	1	1		1	1	1	1	1	1	1	1	1	1	1	1	1	1	1	1	1	1	1	1	0	1	1	1	1	1	1	1	1	1	1	1	1	1	1	1	1	1	1	1	1	1	1	1
MA-00109-2	MA-00109-2	2	2	2		1	2	2	2	0	1	0	1	1	0	2	2	1	0	1	0	1	2	1	1	1	1	1	1	1	1	1	1	0	1	0	1	1	0	2	2	1	0	1	0	1	2	1	1
MA-00109-3	MA-00109-3	4	4	4		1	4	4	4	2	3	3	3	3	3	3	4	3	1	3	2	2	3	4	3	3	2	4	3	3	3	3	3	2	3	3	3	3	3	3	4	3	1	3	2	2	3	4	3
MA-00111-10	MA-00111-10	16	16	16		1	16	16	16	12	12	11	12	13	13	11	11	4	1	4	3	10	15	14	10	12	13	14	13	12	12	12	14	12	12	11	12	13	13	11	11	4	1	4	3	10	15	14	10
MA-00120-576;MA-00111-100	MA-00120-576;MA-00111-100	3;3	3;3	3;3	;	2	3	3	3	0	0	0	0	0	1	0	0	0	0	0	0	1	3	3	1	1	0	2	0	0	0	0	0	0	0	0	0	0	1	0	0	0	0	0	0	1	3	3	1
MA-00111-105	MA-00111-105	11	11	11		1	11	11	11	9	9	7	9	9	9	9	10	6	6	6	7	10	9	8	7	6	9	7	9	8	9	9	9	9	9	7	9	9	9	9	10	6	6	6	7	10	9	8	7
MA-00111-12	MA-00111-12	8	8	8		1	8	8	8	2	2	2	3	3	2	3	0	1	0	1	0	6	7	6	5	6	5	5	5	5	2	4	5	2	2	2	3	3	2	3	0	1	0	1	0	6	7	6	5
MA-00111-14	MA-00111-14	5	5	5		1	5	5	5	3	2	2	3	1	1	3	3	1	3	2	2	0	1	1	2	2	1	1	1	2	3	2	2	3	2	2	3	1	1	3	3	1	3	2	2	0	1	1	2
MA-00111-2;MA-00073-11;MA-00072-54	MA-00111-2	3;1;1	3;1;1	3;1;1		3	3	3	3	2	1	0	2	1	2	0	1	2	2	3	1	2	2	2	3	1	3	2	3	2	3	2	3	2	1	0	2	1	2	0	1	2	2	3	1	2	2	2	3
MA-00111-23	MA-00111-23	3	3	3		1	3	3	3	0	0	0	0	0	0	0	0	0	0	0	0	2	3	2	3	0	0	0	0	0	0	0	0	0	0	0	0	0	0	0	0	0	0	0	0	2	3	2	3
MA-00111-29	MA-00111-29	17	17	12		1	17	17	12	12	14	13	14	14	14	11	13	14	14	14	14	15	15	16	17	16	15	16	16	16	16	15	15	12	14	13	14	14	14	11	13	14	14	14	14	15	15	16	17
MA-00111-3	MA-00111-3	6	6	6		1	6	6	6	5	5	5	4	5	4	5	5	4	3	5	4	2	5	2	3	5	6	5	5	5	5	6	4	5	5	5	4	5	4	5	5	4	3	5	4	2	5	2	3
MA-00111-32	MA-00111-32	6	6	6		1	6	6	6	2	0	2	1	1	0	1	0	1	1	0	0	2	2	2	2	2	1	1	1	3	1	3	0	2	0	2	1	1	0	1	0	1	1	0	0	2	2	2	2
MA-00111-33	MA-00111-33	4	4	4		1	4	4	4	3	4	4	4	4	4	4	4	3	3	3	4	3	3	4	2	2	2	4	4	3	3	4	3	3	4	4	4	4	4	4	4	3	3	3	4	3	3	4	2
MA-00111-34	MA-00111-34	1	1	1		1	1	1	1	0	0	0	0	0	0	0	0	0	0	0	0	1	0	0	1	1	0	0	0	0	0	0	0	0	0	0	0	0	0	0	0	0	0	0	0	1	0	0	1
MA-00111-35	MA-00111-35	8	8	8		1	8	8	8	3	5	3	5	6	4	5	5	4	3	4	6	3	6	5	4	6	6	4	7	4	3	4	5	3	5	3	5	6	4	5	5	4	3	4	6	3	6	5	4
MA-00111-36	MA-00111-36	2	2	2		1	2	2	2	1	0	0	1	0	0	0	0	2	1	2	1	1	0	1	1	0	1	0	1	0	0	0	0	1	0	0	1	0	0	0	0	2	1	2	1	1	0	1	1
MA-00111-40	MA-00111-40	1	1	1		1	1	1	1	0	0	1	0	0	0	0	1	1	1	1	1	1	0	0	1	1	0	0	0	1	0	1	0	0	0	1	0	0	0	0	1	1	1	1	1	1	0	0	1
MA-00111-43	MA-00111-43	19	19	19		1	19	19	19	12	11	9	10	12	13	12	11	13	11	9	12	15	16	18	14	15	15	15	15	13	11	13	14	12	11	9	10	12	13	12	11	13	11	9	12	15	16	18	14
MA-00111-46	MA-00111-46	8	8	8		1	8	8	8	5	7	6	7	5	6	7	5	5	5	5	6	7	4	6	4	6	7	5	4	6	7	7	7	5	7	6	7	5	6	7	5	5	5	5	6	7	4	6	4
MA-00111-58	MA-00111-58	4	4	4		1	4	4	4	3	3	2	0	2	2	2	2	2	2	1	1	2	2	1	1	3	1	3	2	3	2	2	2	3	3	2	0	2	2	2	2	2	2	1	1	2	2	1	1
MA-00111-7	MA-00111-7	14	14	14		1	14	14	14	8	7	5	9	10	10	8	8	6	7	8	8	8	8	7	7	7	11	9	10	7	6	7	9	8	7	5	9	10	10	8	8	6	7	8	8	8	8	7	7
MA-00111-70;MA-00120-592	MA-00111-70;MA-00120-592	11;7	11;7	11;7	;	2	11	11	11	5	4	5	5	6	5	5	3	2	3	3	2	6	6	7	7	5	6	6	5	5	3	7	5	5	4	5	5	6	5	5	3	2	3	3	2	6	6	7	7
MA-00111-81	MA-00111-81	8	8	4		1	8	8	4	5	5	4	5	7	7	6	5	5	7	6	6	5	7	7	7	5	6	5	6	6	6	7	7	5	5	4	5	7	7	6	5	5	7	6	6	5	7	7	7
MA-00111-82	MA-00111-82	27	27	8		1	27	27	8	21	21	23	23	22	21	22	21	19	19	20	18	18	24	23	20	23	22	24	23	22	21	23	23	21	21	23	23	22	21	22	21	19	19	20	18	18	24	23	20
MA-00111-84	MA-00111-84	7	7	5		1	7	7	5	4	5	3	5	6	6	4	4	4	3	2	5	2	5	6	4	6	5	7	6	4	3	3	3	4	5	3	5	6	6	4	4	4	3	2	5	2	5	6	4
MA-00111-89	MA-00111-89	3	3	3		1	3	3	3	2	1	1	3	2	3	3	1	1	2	1	2	1	3	2	1	1	2	3	3	2	2	2	2	2	1	1	3	2	3	3	1	1	2	1	2	1	3	2	1
MA-00111-91	MA-00111-91	3	3	3		1	3	3	3	1	0	0	0	0	0	0	0	0	0	0	0	3	3	2	3	0	0	1	1	0	0	0	1	1	0	0	0	0	0	0	0	0	0	0	0	3	3	2	3
MA-00112-10	MA-00112-10	1	1	1		1	1	1	1	0	0	0	0	0	0	0	0	0	0	0	0	0	0	0	1	0	0	0	0	0	0	0	0	0	0	0	0	0	0	0	0	0	0	0	0	0	0	0	1
MA-00112-103	MA-00112-103	3	3	3		1	3	3	3	2	1	1	1	1	1	1	2	1	1	2	2	1	1	1	1	1	1	1	1	2	1	1	2	2	1	1	1	1	1	1	2	1	1	2	2	1	1	1	1
MA-00112-104	MA-00112-104	7	7	7		1	7	7	7	5	6	5	5	6	4	6	5	4	5	4	3	6	7	7	4	7	6	6	5	6	5	6	5	5	6	5	5	6	4	6	5	4	5	4	3	6	7	7	4
MA-00112-110	MA-00112-110	6	6	6		1	6	6	6	5	4	2	2	4	5	4	4	3	4	4	2	3	3	1	3	3	3	4	2	3	3	4	5	5	4	2	2	4	5	4	4	3	4	4	2	3	3	1	3
MA-00112-118	MA-00112-118	1	1	1		1	1	1	1	0	0	0	1	1	0	0	0	0	0	0	0	0	0	0	0	0	0	0	0	0	0	0	1	0	0	0	1	1	0	0	0	0	0	0	0	0	0	0	0
MA-00112-119	MA-00112-119	4	4	4		1	4	4	4	1	1	2	3	2	2	3	2	1	2	2	2	2	2	2	0	2	1	3	2	1	2	2	4	1	1	2	3	2	2	3	2	1	2	2	2	2	2	2	0
MA-00112-128	MA-00112-128	15	15	13		1	15	15	13	8	8	9	6	7	11	12	9	9	8	9	6	9	12	12	10	12	10	11	13	8	9	9	10	8	8	9	6	7	11	12	9	9	8	9	6	9	12	12	10
MA-00112-133;MA-00055-309	MA-00112-133	18;1	18;1	15;0		2	18	18	15	14	14	10	14	16	14	16	14	12	12	16	13	11	16	14	12	14	10	12	10	13	12	13	13	14	14	10	14	16	14	16	14	12	12	16	13	11	16	14	12
MA-00112-134	MA-00112-134	14	14	14		1	14	14	14	3	6	6	5	4	4	7	5	1	0	0	0	9	8	9	9	6	5	4	5	4	4	3	3	3	6	6	5	4	4	7	5	1	0	0	0	9	8	9	9
MA-00112-135	MA-00112-135	20	20	20		1	20	20	20	14	15	13	18	15	17	18	15	17	15	15	16	15	15	16	15	16	16	15	17	15	15	15	15	14	15	13	18	15	17	18	15	17	15	15	16	15	15	16	15
MA-00112-142	MA-00112-142	1	1	1		1	1	1	1	0	0	0	0	0	0	0	0	1	1	0	0	0	1	0	0	1	1	1	1	1	1	0	0	0	0	0	0	0	0	0	0	1	1	0	0	0	1	0	0
MA-00112-143	MA-00112-143	14	14	14		1	14	14	14	10	10	6	10	5	4	6	7	7	3	4	5	7	4	5	5	3	6	3	4	8	6	8	6	10	10	6	10	5	4	6	7	7	3	4	5	7	4	5	5
MA-00112-154	MA-00112-154	4	4	4		1	4	4	4	2	2	2	3	2	4	2	2	2	2	1	1	0	2	3	2	2	3	2	2	2	3	2	3	2	2	2	3	2	4	2	2	2	2	1	1	0	2	3	2
MA-00112-155	MA-00112-155	3	3	3		1	3	3	3	2	1	1	0	0	0	2	1	2	3	3	3	0	3	0	2	0	2	1	0	0	2	0	0	2	1	1	0	0	0	2	1	2	3	3	3	0	3	0	2
MA-00112-160	MA-00112-160	8	8	8		1	8	8	8	6	5	5	5	6	5	5	7	5	5	5	5	7	7	7	4	6	5	6	6	5	6	5	4	6	5	5	5	6	5	5	7	5	5	5	5	7	7	7	4
MA-00112-163	MA-00112-163	1	1	1		1	1	1	1	0	0	0	0	0	0	0	0	0	0	0	0	1	1	1	1	1	1	0	1	0	0	0	0	0	0	0	0	0	0	0	0	0	0	0	0	1	1	1	1
MA-00112-167	MA-00112-167	22	22	22		1	22	22	22	11	14	13	15	13	11	10	11	13	13	11	10	12	15	14	14	14	13	12	13	12	18	17	16	11	14	13	15	13	11	10	11	13	13	11	10	12	15	14	14
MA-00112-171;MA-00101-86	MA-00112-171	14;6	14;6	14;6		2	14	14	14	9	8	11	10	10	11	11	10	12	9	10	9	8	7	10	10	7	8	9	8	11	11	10	10	9	8	11	10	10	11	11	10	12	9	10	9	8	7	10	10
MA-00112-172	MA-00112-172	1	1	1		1	1	1	1	0	1	0	1	1	0	1	0	1	0	0	0	1	1	1	1	1	1	1	1	1	1	1	1	0	1	0	1	1	0	1	0	1	0	0	0	1	1	1	1
MA-00112-173	MA-00112-173	10	10	10		1	10	10	10	4	6	3	5	5	5	4	4	3	5	6	5	6	8	7	6	6	6	5	7	4	2	3	2	4	6	3	5	5	5	4	4	3	5	6	5	6	8	7	6
MA-00112-174	MA-00112-174	29	19	19		1	29	19	19	18	19	21	20	24	22	22	22	22	19	23	22	11	11	11	10	11	11	12	12	12	12	14	11	9	10	13	12	14	14	13	13	13	12	15	14	2	1	1	1
MA-00112-175	MA-00112-175	43	43	43		1	43	43	43	29	32	31	32	32	33	29	32	29	31	33	31	36	36	37	33	32	33	33	33	31	28	31	34	29	32	31	32	32	33	29	32	29	31	33	31	36	36	37	33
MA-00112-177	MA-00112-177	1	1	1		1	1	1	1	0	0	1	1	0	1	0	1	1	1	1	1	0	0	0	0	0	0	0	0	0	0	0	0	0	0	1	1	0	1	0	1	1	1	1	1	0	0	0	0
MA-00112-181	MA-00112-181	4	4	4		1	4	4	4	1	2	1	2	3	3	1	2	1	1	0	0	0	0	1	0	1	0	1	1	1	0	2	2	1	2	1	2	3	3	1	2	1	1	0	0	0	0	1	0
MA-00112-186	MA-00112-186	4	4	4		1	4	4	4	1	0	1	0	3	1	0	2	1	0	0	1	0	1	0	1	1	1	0	1	1	1	2	1	1	0	1	0	3	1	0	2	1	0	0	1	0	1	0	1
MA-00112-187	MA-00112-187	21	21	21		1	21	21	21	8	11	10	11	11	10	9	13	13	15	12	8	15	16	15	12	12	12	11	15	10	11	9	13	8	11	10	11	11	10	9	13	13	15	12	8	15	16	15	12
MA-00112-188	MA-00112-188	36	36	36		1	36	36	36	28	30	29	29	28	29	31	31	31	32	29	33	27	32	31	29	27	29	28	30	25	27	26	28	28	30	29	29	28	29	31	31	31	32	29	33	27	32	31	29
MA-00112-19	MA-00112-19	11	11	11		1	11	11	11	7	7	6	7	6	7	6	8	5	6	5	4	6	4	5	3	3	3	4	4	6	7	9	9	7	7	6	7	6	7	6	8	5	6	5	4	6	4	5	3
MA-00112-195;MA-00112-204;MA-00112-217	MA-00112-195	8;1;1	8;1;1	6;0;0		3	8	8	6	5	4	3	1	3	3	2	3	2	1	1	1	3	4	4	3	5	4	3	4	6	4	4	5	5	4	3	1	3	3	2	3	2	1	1	1	3	4	4	3
MA-00112-20	MA-00112-20	1	1	1		1	1	1	1	0	0	0	0	0	0	0	0	0	0	1	0	0	0	0	0	0	0	0	0	0	0	0	0	0	0	0	0	0	0	0	0	0	0	1	0	0	0	0	0
MA-00112-202	MA-00112-202	4	4	4		1	4	4	4	2	2	2	1	2	1	1	1	1	0	1	0	0	0	0	0	1	1	1	1	3	3	1	1	2	2	2	1	2	1	1	1	1	0	1	0	0	0	0	0
MA-00112-206	MA-00112-206	5	5	5		1	5	5	5	5	4	3	5	4	4	0	5	4	4	4	3	2	1	2	2	2	1	3	3	4	5	3	4	5	4	3	5	4	4	0	5	4	4	4	3	2	1	2	2
MA-00112-207	MA-00112-207	1	1	1		1	1	1	1	0	0	0	0	0	1	0	0	0	0	0	0	0	0	0	0	0	0	0	0	0	0	0	0	0	0	0	0	0	1	0	0	0	0	0	0	0	0	0	0
MA-00112-21	MA-00112-21	15	15	2		1	15	15	2	12	13	12	14	12	13	14	13	14	12	13	12	14	14	12	14	15	13	14	12	14	13	13	14	12	13	12	14	12	13	14	13	14	12	13	12	14	14	12	14
MA-00112-213	MA-00112-213	7	7	7		1	7	7	7	1	2	1	1	1	1	3	1	3	3	3	1	2	2	2	3	3	2	2	0	2	3	3	3	1	2	1	1	1	1	3	1	3	3	3	1	2	2	2	3
MA-00112-215	MA-00112-215	5	5	5		1	5	5	5	3	3	3	5	3	4	4	3	2	4	4	2	4	3	4	4	4	3	5	3	5	3	5	3	3	3	3	5	3	4	4	3	2	4	4	2	4	3	4	4
MA-00112-221	MA-00112-221	22	22	22		1	22	22	22	13	14	14	13	12	16	11	13	12	14	11	11	15	16	17	13	14	15	15	16	15	14	15	15	13	14	14	13	12	16	11	13	12	14	11	11	15	16	17	13
MA-00112-222	MA-00112-222	2	2	2		1	2	2	2	2	1	1	2	2	2	2	0	1	1	1	1	2	2	2	2	2	2	2	1	2	1	2	2	2	1	1	2	2	2	2	0	1	1	1	1	2	2	2	2
MA-00112-227	MA-00112-227	1	1	1		1	1	1	1	1	1	1	1	1	1	1	1	1	1	1	1	1	1	1	1	1	1	1	1	1	1	1	1	1	1	1	1	1	1	1	1	1	1	1	1	1	1	1	1
MA-00112-229	MA-00112-229	1	1	1		1	1	1	1	0	0	0	0	0	1	0	0	0	0	0	0	0	0	0	1	1	1	1	0	1	0	0	0	0	0	0	0	0	1	0	0	0	0	0	0	0	0	0	1
MA-00112-236	MA-00112-236	1	1	1		1	1	1	1	0	0	0	0	0	0	1	0	0	0	0	0	0	0	0	0	0	0	0	0	0	0	0	0	0	0	0	0	0	0	1	0	0	0	0	0	0	0	0	0
MA-00112-24	MA-00112-24	4	4	4		1	4	4	4	4	3	3	4	3	4	4	3	3	3	3	4	2	3	2	4	2	4	3	3	4	4	4	4	4	3	3	4	3	4	4	3	3	3	3	4	2	3	2	4
MA-00112-243	MA-00112-243	4	4	2		1	4	4	2	4	3	4	4	4	3	4	4	3	4	4	4	3	2	2	3	4	3	1	3	3	3	4	3	4	3	4	4	4	3	4	4	3	4	4	4	3	2	2	3
MA-00112-245	MA-00112-245	18	18	18		1	18	18	18	14	12	15	14	13	13	13	16	10	13	15	10	14	16	16	16	16	16	16	16	15	16	15	15	14	12	15	14	13	13	13	16	10	13	15	10	14	16	16	16
MA-00112-263	MA-00112-263	24	15	15		1	24	15	15	14	14	13	13	14	15	13	13	10	13	11	10	15	18	17	14	15	16	18	16	12	11	17	15	7	7	6	5	6	8	6	7	5	7	5	4	11	12	11	9
MA-00112-270	MA-00112-270	6	6	6		1	6	6	6	3	2	1	3	2	2	3	4	4	4	3	4	1	1	1	1	1	0	1	1	2	1	1	2	3	2	1	3	2	2	3	4	4	4	3	4	1	1	1	1
MA-00112-271	MA-00112-271	9	9	9		1	9	9	9	3	1	3	0	2	2	2	1	1	0	0	0	6	5	5	3	4	2	3	1	1	2	2	2	3	1	3	0	2	2	2	1	1	0	0	0	6	5	5	3
MA-00112-277	MA-00112-277	24	24	24		1	24	24	24	3	5	3	2	6	6	6	4	3	1	4	1	16	17	21	15	19	21	20	19	7	10	11	8	3	5	3	2	6	6	6	4	3	1	4	1	16	17	21	15
MA-00112-278	MA-00112-278	14	14	14		1	14	14	14	12	12	11	11	10	11	11	11	11	12	10	12	13	12	12	12	11	12	11	11	11	11	11	12	12	12	11	11	10	11	11	11	11	12	10	12	13	12	12	12
MA-00112-279	MA-00112-279	1	1	1		1	1	1	1	1	1	0	1	1	1	1	1	1	0	1	1	0	0	0	0	0	1	1	1	1	1	1	1	1	1	0	1	1	1	1	1	1	0	1	1	0	0	0	0
MA-00112-28	MA-00112-28	2	2	2		1	2	2	2	2	1	1	1	1	2	1	1	1	1	0	0	0	0	1	0	0	0	0	0	0	0	0	0	2	1	1	1	1	2	1	1	1	1	0	0	0	0	1	0
MA-00112-283	MA-00112-283	1	1	1		1	1	1	1	0	0	0	1	1	0	0	1	1	1	0	0	1	1	1	1	1	1	1	1	1	1	1	1	0	0	0	1	1	0	0	1	1	1	0	0	1	1	1	1
MA-00112-288	MA-00112-288	12	12	12		1	12	12	12	7	9	8	8	8	7	7	8	10	8	9	10	11	11	11	10	11	12	10	10	9	9	8	9	7	9	8	8	8	7	7	8	10	8	9	10	11	11	11	10
MA-00112-289	MA-00112-289	10	10	10		1	10	10	10	7	8	6	8	9	8	7	8	7	6	8	8	8	9	9	6	8	7	9	8	7	7	8	8	7	8	6	8	9	8	7	8	7	6	8	8	8	9	9	6
MA-00112-29	MA-00112-29	2	2	2		1	2	2	2	1	0	1	1	1	1	1	0	1	0	0	0	0	1	1	1	2	1	1	1	1	1	1	1	1	0	1	1	1	1	1	0	1	0	0	0	0	1	1	1
MA-00112-299;MA-00062-1;MA-00139-97	MA-00112-299;MA-00062-1	4;3;1	1;1;0	1;1;0	;	3	4	1	1	0	0	0	0	0	0	0	0	1	0	0	1	4	4	4	3	3	3	3	4	0	0	0	0	0	0	0	0	0	0	0	0	0	0	0	0	1	1	1	1
MA-00112-3	MA-00112-3	3	3	3		1	3	3	3	2	2	2	1	1	1	0	0	0	1	1	0	3	2	1	2	2	2	1	1	1	1	1	2	2	2	2	1	1	1	0	0	0	1	1	0	3	2	1	2
MA-00112-30	MA-00112-30	3	3	3		1	3	3	3	0	1	0	1	1	0	0	0	0	0	0	1	1	0	0	1	1	1	1	1	1	1	2	1	0	1	0	1	1	0	0	0	0	0	0	1	1	0	0	1
MA-00112-309	MA-00112-309	7	7	7		1	7	7	7	5	5	3	4	4	5	5	5	4	2	4	2	3	6	5	4	3	5	5	4	3	4	5	5	5	5	3	4	4	5	5	5	4	2	4	2	3	6	5	4
MA-00112-31	MA-00112-31	3	3	3		1	3	3	3	2	2	2	2	2	2	3	2	2	3	3	2	3	3	3	2	3	3	3	3	2	3	3	3	2	2	2	2	2	2	3	2	2	3	3	2	3	3	3	2
MA-00112-310	MA-00112-310	13	13	13		1	13	13	13	10	9	9	10	10	8	9	10	6	8	10	10	11	10	10	10	10	12	11	11	11	10	11	12	10	9	9	10	10	8	9	10	6	8	10	10	11	10	10	10
MA-00112-311	MA-00112-311	14	14	14		1	14	14	14	6	4	5	5	5	4	5	3	4	5	4	5	7	7	6	7	5	5	7	7	6	7	8	6	6	4	5	5	5	4	5	3	4	5	4	5	7	7	6	7
MA-00112-313	MA-00112-313	3	3	3		1	3	3	3	2	0	3	1	1	1	1	2	2	2	1	2	2	1	1	1	1	1	1	1	2	1	1	1	2	0	3	1	1	1	1	2	2	2	1	2	2	1	1	1
MA-00112-32	MA-00112-32	4	4	4		1	4	4	4	1	4	1	2	1	2	3	3	3	3	3	2	1	2	1	2	3	3	3	2	2	2	1	3	1	4	1	2	1	2	3	3	3	3	3	2	1	2	1	2
MA-00112-320	MA-00112-320	7	7	7		1	7	7	7	4	5	5	4	4	4	5	4	2	3	4	5	2	2	3	2	3	5	4	4	3	3	2	5	4	5	5	4	4	4	5	4	2	3	4	5	2	2	3	2
MA-00112-334;MA-00032-1	MA-00112-334;MA-00032-1	5;4	5;4	5;4	;	2	5	5	5	3	3	3	4	4	3	4	2	3	2	3	4	2	2	2	2	3	2	3	4	3	2	1	3	3	3	3	4	4	3	4	2	3	2	3	4	2	2	2	2
MA-00112-337	MA-00112-337	2	2	2		1	2	2	2	1	1	1	2	1	1	1	1	2	2	1	1	2	2	1	2	2	1	1	1	1	1	1	1	1	1	1	2	1	1	1	1	2	2	1	1	2	2	1	2
MA-00112-345	MA-00112-345	21	21	21		1	21	21	21	1	0	1	1	0	0	0	1	0	1	0	1	15	20	18	17	11	10	16	15	2	1	2	1	1	0	1	1	0	0	0	1	0	1	0	1	15	20	18	17
MA-00112-35	MA-00112-35	3	2	2		1	3	2	2	1	1	1	1	1	1	1	1	1	1	1	1	2	1	3	2	2	1	1	2	1	1	2	2	0	0	0	0	0	0	0	0	0	0	0	0	1	0	2	1
MA-00112-350	MA-00112-350	7	7	3		1	7	7	3	1	1	1	1	1	1	1	1	1	1	1	2	5	2	1	4	1	2	1	1	1	1	1	1	1	1	1	1	1	1	1	1	1	1	1	2	5	2	1	4
MA-00112-36	MA-00112-36	3	3	3		1	3	3	3	1	1	1	2	1	1	0	1	0	0	0	0	3	2	2	2	2	1	2	2	2	2	2	1	1	1	1	2	1	1	0	1	0	0	0	0	3	2	2	2
MA-00112-37	MA-00112-37	14	14	14		1	14	14	14	6	10	7	10	13	13	13	10	10	10	9	10	10	11	10	8	8	9	9	9	8	11	10	11	6	10	7	10	13	13	13	10	10	10	9	10	10	11	10	8
MA-00112-38	MA-00112-38	4	3	3		1	4	3	3	3	3	2	4	4	4	2	4	3	3	3	2	3	3	3	4	3	4	3	3	4	3	3	3	2	2	1	3	3	3	1	3	2	2	2	1	2	2	2	3
MA-00112-42	MA-00112-42	2	2	2		1	2	2	2	1	1	1	1	1	1	1	1	1	1	1	2	1	1	0	1	1	1	1	0	1	1	1	2	1	1	1	1	1	1	1	1	1	1	1	2	1	1	0	1
MA-00112-43	MA-00112-43	3	3	3		1	3	3	3	0	0	0	0	1	2	1	0	1	2	0	2	0	1	2	0	0	1	0	1	0	1	1	0	0	0	0	0	1	2	1	0	1	2	0	2	0	1	2	0
MA-00112-45	MA-00112-45	1	1	1		1	1	1	1	0	0	0	0	0	0	0	0	0	0	0	0	0	0	1	1	1	1	0	0	0	0	1	0	0	0	0	0	0	0	0	0	0	0	0	0	0	0	1	1
MA-00112-46	MA-00112-46	4	4	4		1	4	4	4	1	2	1	2	1	1	1	1	2	1	1	2	2	2	1	2	1	3	2	2	1	1	1	2	1	2	1	2	1	1	1	1	2	1	1	2	2	2	1	2
MA-00112-50	MA-00112-50	8	8	8		1	8	8	8	4	6	4	6	6	6	5	5	4	4	3	5	5	7	6	5	6	4	6	6	5	4	6	6	4	6	4	6	6	6	5	5	4	4	3	5	5	7	6	5
MA-00112-54	MA-00112-54	16	16	12		1	16	16	12	12	11	9	11	11	9	12	9	12	9	13	11	8	9	8	9	9	8	8	9	7	10	10	8	12	11	9	11	11	9	12	9	12	9	13	11	8	9	8	9
MA-00112-55	MA-00112-55	4	4	4		1	4	4	4	0	0	2	1	1	0	1	0	0	0	1	0	2	4	1	1	1	1	2	1	2	0	0	2	0	0	2	1	1	0	1	0	0	0	1	0	2	4	1	1
MA-00112-57	MA-00112-57	8	8	8		1	8	8	8	4	2	3	4	4	2	2	3	3	3	4	5	3	2	2	3	3	3	0	3	1	2	2	1	4	2	3	4	4	2	2	3	3	3	4	5	3	2	2	3
MA-00112-58	MA-00112-58	6	6	6		1	6	6	6	6	5	5	5	5	5	5	3	6	5	4	5	4	1	1	3	3	4	1	3	4	4	5	4	6	5	5	5	5	5	5	3	6	5	4	5	4	1	1	3
MA-00112-6	MA-00112-6	2	2	2		1	2	2	2	1	1	1	1	1	1	1	1	1	1	2	0	2	1	1	1	1	1	1	1	2	1	1	1	1	1	1	1	1	1	1	1	1	1	2	0	2	1	1	1
MA-00112-63	MA-00112-63	4	4	4		1	4	4	4	2	1	2	1	1	2	1	1	2	3	3	1	2	3	2	2	2	3	2	1	1	1	3	2	2	1	2	1	1	2	1	1	2	3	3	1	2	3	2	2
MA-00112-65	MA-00112-65	17	17	17		1	17	17	17	10	9	10	11	12	11	11	11	9	10	11	10	14	14	15	13	13	14	14	13	11	10	11	11	10	9	10	11	12	11	11	11	9	10	11	10	14	14	15	13
MA-00112-67	MA-00112-67	2	2	2		1	2	2	2	0	0	0	1	0	0	0	0	0	0	0	0	1	1	1	1	0	0	1	0	0	0	1	0	0	0	0	1	0	0	0	0	0	0	0	0	1	1	1	1
MA-00112-72	MA-00112-72	18	18	18		1	18	18	18	14	14	13	12	13	12	12	12	10	13	10	12	10	7	8	8	11	9	11	10	10	13	15	14	14	14	13	12	13	12	12	12	10	13	10	12	10	7	8	8
MA-00112-74	MA-00112-74	27	27	22		1	27	27	22	21	20	22	22	21	22	22	24	23	18	22	20	21	23	24	22	23	23	23	24	23	22	23	21	21	20	22	22	21	22	22	24	23	18	22	20	21	23	24	22
MA-00112-76	MA-00112-76	5	1	1		1	5	1	1	4	4	3	3	3	5	5	2	2	4	4	2	5	4	5	5	4	5	4	4	4	2	2	5	1	1	1	1	1	1	1	0	0	1	1	0	1	1	1	1
MA-00120-195;MA-00112-77	MA-00120-195;MA-00112-77	6;6	6;6	6;6	;	2	6	6	6	3	4	4	4	5	6	5	5	6	4	6	6	4	5	6	5	5	5	3	3	3	3	4	3	3	4	4	4	5	6	5	5	6	4	6	6	4	5	6	5
MA-00112-8	MA-00112-8	3	3	3		1	3	3	3	1	0	2	0	1	2	0	1	0	2	3	1	0	0	0	0	0	0	0	0	3	1	0	2	1	0	2	0	1	2	0	1	0	2	3	1	0	0	0	0
MA-00112-83	MA-00112-83	1	1	1		1	1	1	1	1	1	1	1	1	1	1	1	1	1	1	1	1	1	1	1	1	1	1	1	1	1	1	1	1	1	1	1	1	1	1	1	1	1	1	1	1	1	1	1
MA-00112-84	MA-00112-84	12	12	12		1	12	12	12	8	8	8	7	8	9	8	7	9	9	8	10	9	8	9	9	9	11	9	8	9	10	9	7	8	8	8	7	8	9	8	7	9	9	8	10	9	8	9	9
MA-00112-86	MA-00112-86	4	4	4		1	4	4	4	3	3	4	4	4	4	3	4	3	2	4	2	4	4	4	4	4	4	4	4	4	4	4	4	3	3	4	4	4	4	3	4	3	2	4	2	4	4	4	4
MA-00112-88	MA-00112-88	9	9	9		1	9	9	9	6	5	6	6	5	5	6	4	8	6	4	6	8	8	7	8	7	6	7	7	7	6	5	5	6	5	6	6	5	5	6	4	8	6	4	6	8	8	7	8
MA-00112-9	MA-00112-9	1	1	1		1	1	1	1	0	0	0	0	0	0	0	0	0	0	0	0	0	0	0	0	0	0	0	0	0	0	1	0	0	0	0	0	0	0	0	0	0	0	0	0	0	0	0	0
MA-00112-94	MA-00112-94	3	3	3		1	3	3	3	2	0	0	1	1	2	1	1	1	1	0	0	0	0	1	1	0	1	0	1	2	0	1	1	2	0	0	1	1	2	1	1	1	1	0	0	0	0	1	1
MA-00112-97	MA-00112-97	3	3	3		1	3	3	3	0	0	0	1	2	2	2	1	0	0	0	0	0	0	0	0	0	0	0	0	0	0	0	0	0	0	0	1	2	2	2	1	0	0	0	0	0	0	0	0
MA-00114-1	MA-00114-1	8	8	8		1	8	8	8	4	4	4	3	5	5	4	6	3	3	1	2	7	5	5	8	6	6	5	6	6	4	6	4	4	4	4	3	5	5	4	6	3	3	1	2	7	5	5	8
MA-00114-3	MA-00114-3	12	9	9		1	12	9	9	11	10	7	7	10	10	10	10	8	3	8	9	7	10	9	5	8	9	11	9	8	7	10	8	8	7	4	5	7	7	8	8	6	2	5	7	4	7	6	3
MA-00115-2	MA-00115-2	3	3	3		1	3	3	3	1	2	0	1	1	1	0	1	3	2	2	2	1	1	0	1	0	1	0	1	0	0	0	0	1	2	0	1	1	1	0	1	3	2	2	2	1	1	0	1
MA-00115-3	MA-00115-3	18	18	18		1	18	18	18	15	12	13	14	14	15	12	15	12	15	15	14	15	13	12	12	14	13	15	14	12	11	14	12	15	12	13	14	14	15	12	15	12	15	15	14	15	13	12	12
MA-00118-1	MA-00118-1	25	25	25		1	25	25	25	21	22	21	21	24	24	22	24	22	20	22	22	17	17	19	18	18	18	19	20	20	19	22	19	21	22	21	21	24	24	22	24	22	20	22	22	17	17	19	18
MA-00118-2;MA-00268-66	MA-00118-2	4;1	4;1	4;1		2	4	4	4	3	3	2	1	2	2	1	1	0	0	1	0	3	3	3	3	3	3	2	2	2	2	2	3	3	3	2	1	2	2	1	1	0	0	1	0	3	3	3	3
MA-00118-5	MA-00118-5	19	19	4		1	19	19	4	14	15	11	15	12	16	14	14	10	15	11	15	14	16	19	13	15	18	17	16	16	11	14	13	14	15	11	15	12	16	14	14	10	15	11	15	14	16	19	13
MA-00119-16	MA-00119-16	8	8	8		1	8	8	8	6	6	6	7	6	6	6	6	5	5	5	6	6	6	7	5	7	7	7	6	6	6	7	7	6	6	6	7	6	6	6	6	5	5	5	6	6	6	7	5
MA-00119-19	MA-00119-19	5	5	4		1	5	5	4	3	3	2	3	4	2	3	2	2	2	2	2	1	3	2	3	3	4	3	4	4	3	4	3	3	3	2	3	4	2	3	2	2	2	2	2	1	3	2	3
MA-00120-1	MA-00120-1	4	4	4		1	4	4	4	1	1	0	2	1	1	1	1	0	0	1	0	3	4	0	2	2	2	2	2	3	1	0	2	1	1	0	2	1	1	1	1	0	0	1	0	3	4	0	2
MA-00120-100	MA-00120-100	11	11	11		1	11	11	11	9	10	9	10	10	10	10	8	7	5	6	7	6	10	10	6	8	8	10	11	8	8	10	10	9	10	9	10	10	10	10	8	7	5	6	7	6	10	10	6
MA-00120-101	MA-00120-101	13	2	2		1	13	2	2	5	8	7	6	8	6	7	7	6	7	5	6	10	7	9	8	10	10	5	6	6	8	6	5	1	1	1	1	1	1	1	1	1	2	1	1	1	1	1	1
MA-00120-104	MA-00120-104	1	1	1		1	1	1	1	0	0	0	1	1	0	1	1	0	0	0	0	0	0	1	0	0	0	0	0	0	0	0	0	0	0	0	1	1	0	1	1	0	0	0	0	0	0	1	0
MA-00120-108	MA-00120-108	10	10	10		1	10	10	10	10	8	9	10	8	8	7	9	9	9	7	10	8	7	6	8	8	8	8	8	10	8	9	9	10	8	9	10	8	8	7	9	9	9	7	10	8	7	6	8
MA-00120-110	MA-00120-110	3	3	3		1	3	3	3	0	1	0	1	1	1	1	1	1	1	1	0	1	1	1	1	0	1	0	0	1	0	0	1	0	1	0	1	1	1	1	1	1	1	1	0	1	1	1	1
MA-00120-111	MA-00120-111	6	6	6		1	6	6	6	2	3	3	4	2	3	2	3	2	3	5	2	2	1	2	1	3	3	2	3	2	2	1	2	2	3	3	4	2	3	2	3	2	3	5	2	2	1	2	1
MA-00120-112	MA-00120-112	14	6	6		1	14	6	6	7	7	7	9	9	7	7	10	6	8	6	7	11	14	12	13	12	11	13	13	11	10	10	9	2	2	2	3	3	2	2	4	2	3	2	2	4	6	5	5
MA-00120-114	MA-00120-114	2	2	2		1	2	2	2	2	1	2	2	2	2	2	2	2	2	2	2	1	2	2	2	2	1	2	2	2	2	2	2	2	1	2	2	2	2	2	2	2	2	2	2	1	2	2	2
MA-00120-115	MA-00120-115	1	1	1		1	1	1	1	1	0	0	0	0	0	0	0	0	0	0	0	0	0	0	0	0	0	0	0	0	0	0	0	1	0	0	0	0	0	0	0	0	0	0	0	0	0	0	0
MA-00120-120	MA-00120-120	2	2	2		1	2	2	2	1	0	0	1	0	2	0	1	0	0	0	1	0	1	1	0	0	0	0	0	0	0	0	0	1	0	0	1	0	2	0	1	0	0	0	1	0	1	1	0
MA-00120-121	MA-00120-121	8	8	8		1	8	8	8	5	3	5	5	3	5	6	6	3	3	6	5	7	7	7	6	6	7	6	7	6	6	5	7	5	3	5	5	3	5	6	6	3	3	6	5	7	7	7	6
MA-00120-123	MA-00120-123	10	10	10		1	10	10	10	6	7	8	7	7	6	8	6	6	6	6	8	6	8	7	5	8	6	8	8	6	7	8	7	6	7	8	7	7	6	8	6	6	6	6	8	6	8	7	5
MA-00120-125;MA-00055-284	MA-00120-125;MA-00055-284	2;1	2;1	2;1	;	2	2	2	2	0	0	0	0	0	0	0	0	0	0	0	0	1	2	1	1	2	1	1	1	0	0	1	0	0	0	0	0	0	0	0	0	0	0	0	0	1	2	1	1
MA-00120-136	MA-00120-136	2	2	2		1	2	2	2	1	1	1	1	0	1	1	1	1	1	1	1	2	1	1	1	1	1	1	1	1	2	1	1	1	1	1	1	0	1	1	1	1	1	1	1	2	1	1	1
MA-00120-138	MA-00120-138	24	13	12		1	24	13	12	14	13	11	14	14	14	10	10	12	10	9	9	9	14	13	11	14	13	11	11	16	13	15	13	7	6	6	7	8	5	5	4	6	5	4	4	2	5	7	5
MA-00120-14	MA-00120-14	1	1	1		1	1	1	1	1	1	1	1	1	1	1	1	1	0	1	0	0	1	1	0	0	1	0	1	1	1	1	1	1	1	1	1	1	1	1	1	1	0	1	0	0	1	1	0
MA-00120-140	MA-00120-140	9	9	9		1	9	9	9	6	4	5	6	7	6	7	7	5	2	3	4	4	6	5	3	3	7	7	6	7	6	6	8	6	4	5	6	7	6	7	7	5	2	3	4	4	6	5	3
MA-00120-141	MA-00120-141	33	33	33		1	33	33	33	27	27	27	31	28	30	28	28	22	23	23	25	30	30	32	30	29	30	28	30	29	25	29	31	27	27	27	31	28	30	28	28	22	23	23	25	30	30	32	30
MA-00120-146	MA-00120-146	8	8	8		1	8	8	8	1	0	3	0	2	3	1	2	2	3	3	3	3	6	5	4	3	3	4	3	1	1	1	0	1	0	3	0	2	3	1	2	2	3	3	3	3	6	5	4
MA-00120-147	MA-00120-147	21	21	21		1	21	21	21	4	6	3	6	6	5	3	7	2	4	2	2	17	17	19	16	17	16	14	17	10	6	8	8	4	6	3	6	6	5	3	7	2	4	2	2	17	17	19	16
MA-00120-148	MA-00120-148	26	26	12		1	26	26	12	21	21	20	20	21	20	20	22	22	19	21	21	22	25	25	21	23	22	23	23	23	22	20	22	21	21	20	20	21	20	20	22	22	19	21	21	22	25	25	21
MA-00120-149	MA-00120-149	27	27	27		1	27	27	27	13	18	17	18	18	19	20	19	14	15	15	15	17	22	20	17	17	18	19	18	16	17	18	18	13	18	17	18	18	19	20	19	14	15	15	15	17	22	20	17
MA-00120-15	MA-00120-15	1	1	1		1	1	1	1	0	0	0	1	1	0	0	0	0	1	0	0	0	0	1	0	0	1	0	1	0	1	0	0	0	0	0	1	1	0	0	0	0	1	0	0	0	0	1	0
MA-00120-150	MA-00120-150	6	6	3		1	6	6	3	3	1	1	1	2	2	2	0	0	0	0	2	6	6	6	4	5	5	5	6	2	2	2	2	3	1	1	1	2	2	2	0	0	0	0	2	6	6	6	4
MA-00120-151	MA-00120-151	13	13	13		1	13	13	13	5	6	6	6	7	4	7	4	7	5	7	8	9	8	9	9	7	5	6	7	6	6	6	6	5	6	6	6	7	4	7	4	7	5	7	8	9	8	9	9
MA-00120-153	MA-00120-153	2	2	2		1	2	2	2	0	1	1	1	1	0	1	1	1	1	0	1	1	0	1	1	1	1	1	2	1	1	1	1	0	1	1	1	1	0	1	1	1	1	0	1	1	0	1	1
MA-00120-155	MA-00120-155	8	8	8		1	8	8	8	0	0	1	1	2	3	3	3	4	5	6	4	0	0	0	0	0	0	0	0	0	0	1	1	0	0	1	1	2	3	3	3	4	5	6	4	0	0	0	0
MA-00120-156	MA-00120-156	16	16	16		1	16	16	16	11	10	10	9	13	8	9	9	9	9	8	8	10	8	10	9	8	8	9	10	9	8	10	11	11	10	10	9	13	8	9	9	9	9	8	8	10	8	10	9
MA-00120-157	MA-00120-157	14	14	14		1	14	14	14	12	13	12	13	12	13	12	11	12	11	12	12	11	12	12	11	12	13	12	12	12	12	12	12	12	13	12	13	12	13	12	11	12	11	12	12	11	12	12	11
MA-00120-158;MA-00182-203	MA-00120-158	7;1	7;1	7;1		2	7	7	7	3	3	1	2	3	1	1	2	3	3	3	3	2	2	2	3	4	3	2	3	2	1	3	2	3	3	1	2	3	1	1	2	3	3	3	3	2	2	2	3
MA-00323-84;MA-00120-167	MA-00323-84;MA-00120-167	4;4	4;4	4;4	;	2	4	4	4	1	2	1	2	3	3	3	0	3	3	1	3	2	3	2	2	2	2	2	1	2	2	1	3	1	2	1	2	3	3	3	0	3	3	1	3	2	3	2	2
MA-00120-17	MA-00120-17	13	13	13		1	13	13	13	8	7	7	7	8	8	6	6	6	5	7	7	6	11	11	9	9	9	10	11	8	6	6	9	8	7	7	7	8	8	6	6	6	5	7	7	6	11	11	9
MA-00120-175	MA-00120-175	4	4	4		1	4	4	4	4	2	2	2	2	2	3	3	3	3	3	2	4	3	3	3	3	3	3	3	3	2	3	2	4	2	2	2	2	2	3	3	3	3	3	2	4	3	3	3
MA-00120-177;MA-00323-83	MA-00120-177;MA-00323-83	2;2	2;2	2;2	;	2	2	2	2	1	2	2	2	2	2	2	2	2	2	2	2	2	2	2	2	2	2	2	2	2	2	2	2	1	2	2	2	2	2	2	2	2	2	2	2	2	2	2	2
MA-00120-190	MA-00120-190	16	16	16		1	16	16	16	13	12	13	13	16	13	12	12	13	10	13	14	11	14	14	12	14	13	14	13	13	15	12	12	13	12	13	13	16	13	12	12	13	10	13	14	11	14	14	12
MA-00120-192	MA-00120-192	9	9	9		1	9	9	9	3	4	4	3	4	6	4	5	3	4	4	4	2	2	3	3	2	3	4	1	2	4	4	2	3	4	4	3	4	6	4	5	3	4	4	4	2	2	3	3
MA-00120-193	MA-00120-193	1	1	1		1	1	1	1	1	1	1	1	1	1	1	1	1	1	1	1	1	1	1	1	1	1	1	1	1	1	1	1	1	1	1	1	1	1	1	1	1	1	1	1	1	1	1	1
MA-00120-194;MA-00323-37	MA-00120-194	7;2	5;1	5;1		2	7	5	5	3	2	2	2	4	3	2	4	1	1	0	1	5	3	2	4	4	3	5	4	4	3	3	3	2	1	1	1	2	2	1	2	1	1	0	1	3	2	2	2
MA-00120-196	MA-00120-196	8	8	4		1	8	8	4	5	4	4	4	5	7	7	2	3	5	5	2	6	4	7	6	4	7	6	6	5	4	3	7	5	4	4	4	5	7	7	2	3	5	5	2	6	4	7	6
MA-00120-197	MA-00120-197	2	2	2		1	2	2	2	0	0	0	0	0	1	1	0	0	0	0	0	1	1	2	1	1	1	1	1	0	0	0	1	0	0	0	0	0	1	1	0	0	0	0	0	1	1	2	1
MA-00120-198	MA-00120-198	15	15	15		1	15	15	15	13	14	14	14	14	12	14	14	13	11	14	14	13	15	14	14	14	15	14	15	15	13	14	14	13	14	14	14	14	12	14	14	13	11	14	14	13	15	14	14
MA-00120-199	MA-00120-199	19	14	14		1	19	14	14	13	15	14	13	15	10	16	14	12	11	13	12	16	14	14	14	13	14	13	16	13	11	16	11	9	10	9	9	11	6	11	9	8	7	8	7	11	9	9	9
MA-00120-20	MA-00120-20	8	8	8		1	8	8	8	1	1	0	1	1	3	2	3	2	1	2	1	5	1	3	0	1	2	2	2	1	0	1	1	1	1	0	1	1	3	2	3	2	1	2	1	5	1	3	0
MA-00120-207;MA-00112-59	MA-00120-207	4;1	4;1	4;1		2	4	4	4	0	1	1	0	0	2	1	0	0	2	0	1	3	2	2	2	1	1	2	2	2	1	2	0	0	1	1	0	0	2	1	0	0	2	0	1	3	2	2	2
MA-00120-208	MA-00120-208	12	12	12		1	12	12	12	10	9	9	10	9	10	11	10	9	9	9	10	9	11	9	8	8	8	9	11	8	8	10	9	10	9	9	10	9	10	11	10	9	9	9	10	9	11	9	8
MA-00120-21	MA-00120-21	4	4	4		1	4	4	4	2	0	1	2	1	4	3	3	2	2	1	1	0	1	1	0	2	1	1	2	3	2	1	1	2	0	1	2	1	4	3	3	2	2	1	1	0	1	1	0
MA-00120-215	MA-00120-215	2	2	2		1	2	2	2	1	0	1	1	1	1	1	1	0	1	1	1	0	1	0	1	0	1	1	1	1	0	1	1	1	0	1	1	1	1	1	1	0	1	1	1	0	1	0	1
MA-00120-216	MA-00120-216	5	3	3		1	5	3	3	2	2	1	2	2	2	1	2	2	2	2	2	1	3	1	2	3	3	1	3	2	3	2	3	2	2	1	2	2	2	1	2	2	2	2	1	1	2	1	2
MA-00120-22	MA-00120-22	14	14	14		1	14	14	14	11	11	8	12	11	12	11	12	9	9	8	8	11	12	11	13	11	12	12	12	12	13	11	12	11	11	8	12	11	12	11	12	9	9	8	8	11	12	11	13
MA-00120-222	MA-00120-222	10	10	10		1	10	10	10	9	8	9	9	9	9	9	7	7	8	7	8	7	9	8	7	8	8	7	9	7	7	10	8	9	8	9	9	9	9	9	7	7	8	7	8	7	9	8	7
MA-00120-223	MA-00120-223	7	7	7		1	7	7	7	3	6	6	6	5	5	4	6	5	4	5	5	4	5	6	4	5	5	6	6	5	5	5	5	3	6	6	6	5	5	4	6	5	4	5	5	4	5	6	4
MA-00120-225	MA-00120-225	10	10	10		1	10	10	10	4	6	4	5	6	4	5	7	5	3	3	4	6	8	7	7	6	6	7	7	6	7	5	6	4	6	4	5	6	4	5	7	5	3	3	4	6	8	7	7
MA-00120-24	MA-00120-24	7	7	7		1	7	7	7	3	4	3	4	4	4	5	4	4	5	3	4	4	4	5	5	4	4	5	4	4	4	3	5	3	4	3	4	4	4	5	4	4	5	3	4	4	4	5	5
MA-00120-240	MA-00120-240	4	4	4		1	4	4	4	3	3	2	2	4	3	3	3	3	3	3	3	3	3	3	3	4	4	3	2	3	3	4	3	3	3	2	2	4	3	3	3	3	3	3	3	3	3	3	3
MA-00120-247	MA-00120-247	36	7	7		1	36	7	7	26	26	30	26	27	28	30	26	25	22	24	24	29	30	32	28	29	29	32	34	28	32	33	30	3	1	3	3	2	3	4	2	2	2	1	2	3	4	4	4
MA-00120-25	MA-00120-25	3	3	3		1	3	3	3	0	0	0	0	1	0	0	0	0	0	0	1	1	2	1	1	0	1	1	2	1	1	0	0	0	0	0	0	1	0	0	0	0	0	0	1	1	2	1	1
MA-00120-250	MA-00120-250	17	17	2		1	17	17	2	14	14	14	15	15	15	15	14	13	13	13	14	15	15	15	15	13	13	15	14	15	14	13	16	14	14	14	15	15	15	15	14	13	13	13	14	15	15	15	15
MA-00120-251	MA-00120-251	7	7	7		1	7	7	7	5	3	3	5	5	5	4	4	3	5	5	4	5	7	4	7	7	5	4	5	4	4	4	4	5	3	3	5	5	5	4	4	3	5	5	4	5	7	4	7
MA-00120-257	MA-00120-257	2	2	2		1	2	2	2	1	1	1	1	1	1	1	1	1	1	1	1	2	1	1	1	1	1	1	1	1	1	1	1	1	1	1	1	1	1	1	1	1	1	1	1	2	1	1	1
MA-00120-259	MA-00120-259	7	7	7		1	7	7	7	5	4	4	3	3	5	3	4	3	2	3	3	5	5	6	4	4	2	4	5	4	4	4	3	5	4	4	3	3	5	3	4	3	2	3	3	5	5	6	4
MA-00120-26	MA-00120-26	2	2	2		1	2	2	2	1	0	1	1	2	1	1	0	1	1	1	1	0	0	1	0	1	0	0	1	0	1	1	1	1	0	1	1	2	1	1	0	1	1	1	1	0	0	1	0
MA-00120-261	MA-00120-261	11	11	11		1	11	11	11	11	10	11	10	11	11	11	11	11	10	11	11	10	11	11	11	11	11	11	11	10	11	11	11	11	10	11	10	11	11	11	11	11	10	11	11	10	11	11	11
MA-00120-265	MA-00120-265	11	11	11		1	11	11	11	10	7	9	9	6	7	7	6	7	4	4	2	9	8	11	9	9	10	9	11	10	9	9	8	10	7	9	9	6	7	7	6	7	4	4	2	9	8	11	9
MA-00120-267	MA-00120-267	2	1	1		1	2	1	1	1	1	1	1	1	1	1	1	1	1	1	1	2	2	2	2	2	2	1	2	2	1	1	1	0	0	0	0	0	0	0	0	0	0	0	0	1	1	1	1
MA-00120-268	MA-00120-268	7	7	7		1	7	7	7	6	5	5	6	6	4	7	6	5	5	6	6	3	4	5	3	5	4	5	6	6	6	6	6	6	5	5	6	6	4	7	6	5	5	6	6	3	4	5	3
MA-00120-270	MA-00120-270	21	21	21		1	21	21	21	15	15	15	17	18	15	18	16	15	14	10	13	16	19	19	15	17	18	19	21	18	17	18	20	15	15	15	17	18	15	18	16	15	14	10	13	16	19	19	15
MA-00120-272	MA-00120-272	11	11	11		1	11	11	11	5	4	6	6	6	6	6	4	4	1	3	3	4	7	7	4	5	6	6	7	6	6	7	6	5	4	6	6	6	6	6	4	4	1	3	3	4	7	7	4
MA-00120-274	MA-00120-274	1	1	1		1	1	1	1	1	1	1	1	1	0	1	1	0	1	0	0	0	0	0	0	0	1	0	0	1	1	1	1	1	1	1	1	1	0	1	1	0	1	0	0	0	0	0	0
MA-00120-277;MA-00182-200	MA-00120-277;MA-00182-200	4;2	4;2	4;2	;	2	4	4	4	3	2	3	4	3	3	2	3	4	1	2	3	4	4	4	3	4	2	4	4	3	4	3	3	3	2	3	4	3	3	2	3	4	1	2	3	4	4	4	3
MA-00120-278	MA-00120-278	7	7	7		1	7	7	7	6	6	6	4	6	7	6	6	5	4	6	4	3	3	3	3	3	3	5	4	5	4	5	4	6	6	6	4	6	7	6	6	5	4	6	4	3	3	3	3
MA-00120-280	MA-00120-280	21	21	7		1	21	21	7	16	16	14	16	16	18	17	16	15	13	15	17	16	19	20	17	17	15	19	18	16	16	17	19	16	16	14	16	16	18	17	16	15	13	15	17	16	19	20	17
MA-00120-281	MA-00120-281	3	3	3		1	3	3	3	2	2	2	3	3	3	3	3	2	3	2	2	2	3	3	2	2	3	2	3	2	3	2	2	2	2	2	3	3	3	3	3	2	3	2	2	2	3	3	2
MA-00120-29	MA-00120-29	1	1	1		1	1	1	1	0	0	0	0	0	0	0	1	0	1	0	0	1	1	0	1	1	0	1	0	1	1	1	1	0	0	0	0	0	0	0	1	0	1	0	0	1	1	0	1
MA-00120-294	MA-00120-294	2	2	2		1	2	2	2	1	0	1	1	0	0	1	1	0	2	0	0	1	1	1	0	0	1	0	1	1	2	1	1	1	0	1	1	0	0	1	1	0	2	0	0	1	1	1	0
MA-00120-295;MA-00182-176	MA-00120-295	13;1	13;1	13;1		2	13	13	13	9	7	6	10	11	9	9	9	6	6	8	8	5	7	5	4	5	9	7	8	9	7	12	8	9	7	6	10	11	9	9	9	6	6	8	8	5	7	5	4
MA-00120-298	MA-00120-298	1	1	1		1	1	1	1	1	1	0	1	1	1	0	1	1	0	1	1	0	1	1	0	1	1	1	1	1	1	1	1	1	1	0	1	1	1	0	1	1	0	1	1	0	1	1	0
MA-00120-30	MA-00120-30	4	4	4		1	4	4	4	2	2	2	2	2	2	1	2	2	1	3	1	2	2	1	1	2	1	1	2	2	2	2	1	2	2	2	2	2	2	1	2	2	1	3	1	2	2	1	1
MA-00120-304	MA-00120-304	26	20	17		1	26	20	17	22	18	14	18	21	18	20	19	14	13	15	13	5	7	9	8	15	11	15	13	17	18	17	21	16	13	9	12	16	12	15	13	8	8	10	9	2	3	3	4
MA-00120-307	MA-00120-307	2	2	2		1	2	2	2	2	1	0	2	2	1	2	2	2	0	1	1	0	0	2	1	0	1	1	0	1	2	2	0	2	1	0	2	2	1	2	2	2	0	1	1	0	0	2	1
MA-00120-312	MA-00120-312	2	2	2		1	2	2	2	0	1	0	0	0	1	0	0	0	0	0	0	0	0	0	0	1	1	0	1	1	1	0	1	0	1	0	0	0	1	0	0	0	0	0	0	0	0	0	0
MA-00120-318	MA-00120-318	34	34	31		1	34	34	31	32	29	29	28	29	31	29	32	29	28	27	29	27	30	29	27	26	29	30	31	29	28	30	31	32	29	29	28	29	31	29	32	29	28	27	29	27	30	29	27
MA-00120-321	MA-00120-321	9	9	9		1	9	9	9	5	4	4	3	4	5	3	3	4	5	2	4	7	6	6	7	6	7	7	7	4	6	6	3	5	4	4	3	4	5	3	3	4	5	2	4	7	6	6	7
MA-00120-323	MA-00120-323	45	45	45		1	45	45	45	40	38	41	39	39	40	40	41	37	38	38	39	30	37	35	32	38	37	41	40	37	37	39	39	40	38	41	39	39	40	40	41	37	38	38	39	30	37	35	32
MA-00120-325	MA-00120-325	4	4	4		1	4	4	4	3	3	3	3	3	3	4	3	4	2	3	2	3	2	4	3	4	3	3	3	3	4	3	3	3	3	3	3	3	3	4	3	4	2	3	2	3	2	4	3
MA-00120-326	MA-00120-326	16	16	16		1	16	16	16	7	10	6	6	4	5	4	6	5	7	6	6	7	5	4	8	8	6	3	5	7	5	6	9	7	10	6	6	4	5	4	6	5	7	6	6	7	5	4	8
MA-00323-111;MA-00120-328	MA-00323-111;MA-00120-328	1;1	1;1	1;1	;	2	1	1	1	1	1	1	1	1	1	1	1	1	1	1	1	1	1	1	1	1	1	1	1	1	1	1	1	1	1	1	1	1	1	1	1	1	1	1	1	1	1	1	1
MA-00120-329	MA-00120-329	2	2	2		1	2	2	2	1	0	1	0	1	0	0	0	0	1	0	0	1	0	0	2	0	0	0	1	1	1	0	0	1	0	1	0	1	0	0	0	0	1	0	0	1	0	0	2
MA-00120-33	MA-00120-33	1	1	1		1	1	1	1	0	0	0	0	0	1	0	0	0	0	0	0	0	0	0	0	0	0	0	0	0	0	0	0	0	0	0	0	0	1	0	0	0	0	0	0	0	0	0	0
MA-00120-336	MA-00120-336	34	18	18		1	34	18	18	18	18	18	15	19	16	16	17	18	15	18	19	28	31	30	25	27	28	28	30	18	19	19	16	2	2	2	1	3	1	2	1	2	1	3	3	14	15	15	12
MA-00120-34	MA-00120-34	8	8	8		1	8	8	8	5	5	5	5	6	4	5	3	5	2	5	4	6	6	7	4	6	5	6	5	5	3	6	6	5	5	5	5	6	4	5	3	5	2	5	4	6	6	7	4
MA-00120-343	MA-00120-343	12	12	12		1	12	12	12	3	4	6	8	7	5	6	7	7	7	8	4	2	2	5	5	2	4	3	3	5	6	7	6	3	4	6	8	7	5	6	7	7	7	8	4	2	2	5	5
MA-00120-346	MA-00120-346	19	14	14		1	19	14	14	15	17	14	16	16	17	16	15	17	17	16	16	12	13	11	11	14	11	11	10	12	13	13	11	11	13	10	11	11	12	11	11	13	13	12	12	8	8	7	8
MA-00120-347	MA-00120-347	1	1	1		1	1	1	1	0	1	1	0	0	1	1	0	0	0	0	0	0	0	1	0	0	0	0	1	0	0	1	0	0	1	1	0	0	1	1	0	0	0	0	0	0	0	1	0
MA-00120-35	MA-00120-35	19	19	19		1	19	19	19	13	13	14	14	13	16	12	12	12	9	14	15	10	9	11	11	9	9	10	11	10	11	13	12	13	13	14	14	13	16	12	12	12	9	14	15	10	9	11	11
MA-00120-350	MA-00120-350	13	13	13		1	13	13	13	5	5	5	10	7	7	6	5	4	6	4	5	5	5	5	6	5	6	6	6	8	6	5	5	5	5	5	10	7	7	6	5	4	6	4	5	5	5	5	6
MA-00120-352	MA-00120-352	2	2	2		1	2	2	2	1	1	0	1	1	0	0	0	0	0	0	0	0	1	0	0	0	0	0	0	1	1	0	1	1	1	0	1	1	0	0	0	0	0	0	0	0	1	0	0
MA-00120-36	MA-00120-36	9	9	9		1	9	9	9	7	7	8	8	7	9	9	9	9	8	9	7	7	7	7	7	7	8	7	6	8	8	7	8	7	7	8	8	7	9	9	9	9	8	9	7	7	7	7	7
MA-00120-363	MA-00120-363	2	2	2		1	2	2	2	2	2	2	1	2	2	2	2	2	1	1	1	2	1	2	2	1	2	2	2	2	2	1	2	2	2	2	1	2	2	2	2	2	1	1	1	2	1	2	2
MA-00120-365	MA-00120-365	6	6	6		1	6	6	6	2	1	2	1	0	1	1	0	0	0	0	1	3	4	3	3	2	4	4	4	2	2	1	2	2	1	2	1	0	1	1	0	0	0	0	1	3	4	3	3
MA-00120-370	MA-00120-370	17	17	17		1	17	17	17	6	4	2	8	9	6	7	6	7	8	6	8	7	10	9	3	7	7	10	7	4	2	7	7	6	4	2	8	9	6	7	6	7	8	6	8	7	10	9	3
MA-00120-372	MA-00120-372	15	15	15		1	15	15	15	10	5	9	10	9	8	11	9	8	8	8	6	3	6	6	5	5	3	7	5	7	7	8	9	10	5	9	10	9	8	11	9	8	8	8	6	3	6	6	5
MA-00120-374	MA-00120-374	2	2	2		1	2	2	2	1	1	1	1	1	1	1	1	1	1	1	1	1	1	1	2	1	1	2	1	1	1	2	1	1	1	1	1	1	1	1	1	1	1	1	1	1	1	1	2
MA-00120-375	MA-00120-375	4	4	4		1	4	4	4	1	1	1	0	2	1	1	2	0	0	1	1	2	2	2	2	1	3	2	1	1	3	3	2	1	1	1	0	2	1	1	2	0	0	1	1	2	2	2	2
MA-00120-384	MA-00120-384	18	18	14		1	18	18	14	9	9	12	13	11	9	12	11	8	8	8	7	14	13	17	15	14	12	13	13	11	10	11	10	9	9	12	13	11	9	12	11	8	8	8	7	14	13	17	15
MA-00120-39	MA-00120-39	7	7	7		1	7	7	7	0	0	0	0	1	0	1	0	0	0	0	0	6	3	4	4	2	0	2	1	0	0	0	2	0	0	0	0	1	0	1	0	0	0	0	0	6	3	4	4
MA-00120-390	MA-00120-390	8	8	8		1	8	8	8	3	2	3	6	5	4	5	2	3	1	2	3	2	2	4	6	5	6	3	5	4	3	4	6	3	2	3	6	5	4	5	2	3	1	2	3	2	2	4	6
MA-00120-392	MA-00120-392	14	14	14		1	14	14	14	10	10	13	13	12	11	13	11	9	10	9	9	10	12	12	8	10	11	11	13	8	9	12	12	10	10	13	13	12	11	13	11	9	10	9	9	10	12	12	8
MA-00120-397	MA-00120-397	4	4	4		1	4	4	4	2	2	1	4	3	3	3	3	2	1	2	2	3	2	3	2	2	2	2	2	2	1	1	2	2	2	1	4	3	3	3	3	2	1	2	2	3	2	3	2
MA-00120-398	MA-00120-398	4	4	4		1	4	4	4	3	3	2	3	4	4	3	3	2	2	2	2	2	4	4	3	2	3	4	3	3	3	2	2	3	3	2	3	4	4	3	3	2	2	2	2	2	4	4	3
MA-00120-404	MA-00120-404	37	33	32		1	37	33	32	25	23	24	24	25	26	24	24	22	24	24	24	29	32	31	27	28	32	31	32	25	29	31	29	22	19	21	21	21	23	21	21	19	21	20	20	26	28	27	24
MA-00120-42	MA-00120-42	8	8	8		1	8	8	8	5	8	5	6	7	7	7	6	6	7	5	7	4	3	3	2	4	5	2	4	7	5	4	7	5	8	5	6	7	7	7	6	6	7	5	7	4	3	3	2
MA-00120-428	MA-00120-428	9	9	9		1	9	9	9	6	7	6	7	6	6	7	7	5	5	5	6	7	7	8	5	7	7	8	9	6	5	7	6	6	7	6	7	6	6	7	7	5	5	5	6	7	7	8	5
MA-00120-429	MA-00120-429	5	5	5		1	5	5	5	3	2	3	4	4	3	3	3	4	3	4	4	3	3	4	4	3	4	2	3	4	4	4	2	3	2	3	4	4	3	3	3	4	3	4	4	3	3	4	4
MA-00120-430	MA-00120-430	16	16	16		1	16	16	16	9	7	8	7	8	9	10	9	9	6	10	9	5	6	8	6	6	8	10	11	7	11	7	8	9	7	8	7	8	9	10	9	9	6	10	9	5	6	8	6
MA-00120-432	MA-00120-432	2	2	2		1	2	2	2	1	1	1	1	1	1	1	1	0	1	0	1	0	1	1	0	1	2	1	1	1	0	1	1	1	1	1	1	1	1	1	1	0	1	0	1	0	1	1	0
MA-00120-433	MA-00120-433	4	4	4		1	4	4	4	3	3	3	3	3	4	4	3	3	4	4	4	4	2	3	3	4	3	4	4	3	2	4	4	3	3	3	3	3	4	4	3	3	4	4	4	4	2	3	3
MA-00120-439	MA-00120-439	12	12	12		1	12	12	12	8	9	7	8	9	9	8	10	7	8	8	8	9	8	7	6	9	11	9	10	9	8	11	9	8	9	7	8	9	9	8	10	7	8	8	8	9	8	7	6
MA-00120-442	MA-00120-442	11	11	11		1	11	11	11	5	6	4	7	7	4	5	7	4	3	4	2	7	10	8	8	6	6	7	7	4	5	6	5	5	6	4	7	7	4	5	7	4	3	4	2	7	10	8	8
MA-00120-45	MA-00120-45	27	27	27		1	27	27	27	16	20	18	15	20	18	21	18	16	15	16	12	19	24	22	18	20	17	20	21	20	21	20	19	16	20	18	15	20	18	21	18	16	15	16	12	19	24	22	18
MA-00120-454	MA-00120-454	1	1	1		1	1	1	1	0	0	0	0	0	0	0	0	0	0	0	0	1	1	1	1	1	0	1	1	0	0	0	1	0	0	0	0	0	0	0	0	0	0	0	0	1	1	1	1
MA-00120-456	MA-00120-456	5	5	5		1	5	5	5	2	2	2	3	1	3	2	2	2	2	2	3	5	2	2	2	2	3	2	2	3	3	1	2	2	2	2	3	1	3	2	2	2	2	2	3	5	2	2	2
MA-00120-457	MA-00120-457	1	1	1		1	1	1	1	0	0	0	0	0	0	0	0	0	0	0	0	1	0	0	0	0	0	0	0	0	0	0	0	0	0	0	0	0	0	0	0	0	0	0	0	1	0	0	0
MA-00120-471	MA-00120-471	6	6	6		1	6	6	6	1	1	1	2	2	2	3	2	2	2	2	2	5	2	4	3	3	4	2	5	2	2	4	3	1	1	1	2	2	2	3	2	2	2	2	2	5	2	4	3
MA-00120-476	MA-00120-476	11	4	4		1	11	4	4	10	9	10	9	8	10	9	10	6	9	8	9	9	9	8	9	9	10	9	9	7	9	9	9	4	3	3	2	3	3	2	3	2	4	3	4	3	3	2	3
MA-00120-484	MA-00120-484	11	11	11		1	11	11	11	11	10	10	9	10	11	11	10	10	9	10	11	9	9	9	8	8	10	10	11	9	8	11	9	11	10	10	9	10	11	11	10	10	9	10	11	9	9	9	8
MA-00120-489	MA-00120-489	4	4	4		1	4	4	4	0	0	0	1	0	0	0	1	1	1	1	0	4	4	3	3	1	3	3	3	0	0	0	1	0	0	0	1	0	0	0	1	1	1	1	0	4	4	3	3
MA-00120-490	MA-00120-490	1	1	1		1	1	1	1	1	1	1	1	1	1	1	1	1	1	1	1	1	1	1	1	1	0	1	0	0	1	0	1	1	1	1	1	1	1	1	1	1	1	1	1	1	1	1	1
MA-00120-493	MA-00120-493	3	3	3		1	3	3	3	2	2	2	2	3	1	1	2	2	0	0	2	0	1	1	0	1	2	2	1	2	2	2	2	2	2	2	2	3	1	1	2	2	0	0	2	0	1	1	0
MA-00120-5	MA-00120-5	15	15	15		1	15	15	15	11	11	11	11	12	13	11	13	10	10	12	11	7	10	9	9	11	10	11	12	12	11	13	13	11	11	11	11	12	13	11	13	10	10	12	11	7	10	9	9
MA-00120-502	MA-00120-502	20	20	20		1	20	20	20	20	18	19	19	20	20	20	18	17	18	19	20	16	20	20	17	19	20	19	20	20	20	19	20	20	18	19	19	20	20	20	18	17	18	19	20	16	20	20	17
MA-00120-52	MA-00120-52	3	3	3		1	3	3	3	2	3	2	2	2	2	2	2	2	3	1	3	0	0	1	0	0	0	0	0	1	0	0	0	2	3	2	2	2	2	2	2	2	3	1	3	0	0	1	0
MA-00120-524	MA-00120-524	3	3	3		1	3	3	3	0	0	0	0	1	1	0	0	0	0	1	1	1	0	1	1	1	3	1	1	3	2	1	2	0	0	0	0	1	1	0	0	0	0	1	1	1	0	1	1
MA-00120-529	MA-00120-529	1	1	1		1	1	1	1	0	0	0	0	1	0	1	0	1	1	1	0	0	0	0	0	0	0	0	0	0	0	0	0	0	0	0	0	1	0	1	0	1	1	1	0	0	0	0	0
MA-00120-53	MA-00120-53	11	11	11		1	11	11	11	4	2	3	4	6	4	4	7	4	4	5	4	3	3	3	1	3	2	3	3	3	3	6	7	4	2	3	4	6	4	4	7	4	4	5	4	3	3	3	1
MA-00120-530	MA-00120-530	5	5	5		1	5	5	5	4	4	4	4	4	4	4	5	4	4	4	4	4	3	3	3	4	5	4	5	4	4	3	4	4	4	4	4	4	4	4	5	4	4	4	4	4	3	3	3
MA-00120-536	MA-00120-536	4	2	2		1	4	2	2	2	4	4	4	4	4	3	3	3	3	3	4	4	3	4	3	4	4	1	4	2	4	4	3	1	2	2	2	2	2	1	1	1	1	1	2	2	1	2	1
MA-00120-539	MA-00120-539	1	1	1		1	1	1	1	1	1	1	1	1	1	1	0	1	1	1	1	0	0	1	0	1	0	0	0	1	1	1	0	1	1	1	1	1	1	1	0	1	1	1	1	0	0	1	0
MA-00120-54	MA-00120-54	17	17	17		1	17	17	17	12	13	13	12	12	13	13	13	14	12	13	10	15	13	15	15	15	14	13	13	11	14	13	14	12	13	13	12	12	13	13	13	14	12	13	10	15	13	15	15
MA-00120-540	MA-00120-540	1	1	1		1	1	1	1	1	0	1	1	0	1	1	1	1	1	1	1	0	1	1	1	1	1	1	1	1	1	1	1	1	0	1	1	0	1	1	1	1	1	1	1	0	1	1	1
MA-00120-548	MA-00120-548	3	3	3		1	3	3	3	1	1	0	0	1	0	2	1	0	1	1	1	0	0	0	0	2	1	0	0	1	0	1	0	1	1	0	0	1	0	2	1	0	1	1	1	0	0	0	0
MA-00120-552	MA-00120-552	2	2	2		1	2	2	2	2	1	1	1	1	2	1	2	0	1	2	2	2	1	1	2	2	2	0	2	1	0	0	1	2	1	1	1	1	2	1	2	0	1	2	2	2	1	1	2
MA-00120-557	MA-00120-557	11	11	11		1	11	11	11	6	7	5	9	8	8	5	5	7	6	6	3	7	5	5	4	6	6	5	6	4	7	4	4	6	7	5	9	8	8	5	5	7	6	6	3	7	5	5	4
MA-00120-559	MA-00120-559	9	9	9		1	9	9	9	3	5	6	4	3	2	3	6	1	2	2	1	7	7	8	6	7	7	8	8	3	5	7	6	3	5	6	4	3	2	3	6	1	2	2	1	7	7	8	6
MA-00120-561	MA-00120-561	9	9	9		1	9	9	9	6	6	7	7	6	5	7	6	5	4	3	5	9	8	8	9	9	7	8	9	8	8	8	8	6	6	7	7	6	5	7	6	5	4	3	5	9	8	8	9
MA-00120-563	MA-00120-563	6	6	6		1	6	6	6	5	4	3	4	4	4	3	3	5	4	2	4	3	3	5	4	3	3	4	5	3	3	4	4	5	4	3	4	4	4	3	3	5	4	2	4	3	3	5	4
MA-00120-569	MA-00120-569	3	3	3		1	3	3	3	3	3	3	3	3	3	2	3	1	3	3	1	2	3	2	3	1	2	3	3	3	1	3	3	3	3	3	3	3	3	2	3	1	3	3	1	2	3	2	3
MA-00120-575	MA-00120-575	31	31	31		1	31	31	31	21	17	18	16	20	20	18	14	17	14	15	15	23	22	19	16	21	19	21	23	21	18	17	18	21	17	18	16	20	20	18	14	17	14	15	15	23	22	19	16
MA-00120-577	MA-00120-577	16	16	16		1	16	16	16	1	0	1	1	1	2	1	1	4	3	2	2	11	12	12	9	11	11	8	12	3	2	4	2	1	0	1	1	1	2	1	1	4	3	2	2	11	12	12	9
MA-00120-580	MA-00120-580	27	8	8		1	27	8	8	23	22	23	22	23	22	20	21	18	17	18	20	20	25	22	19	22	24	22	23	21	21	22	21	6	6	6	5	6	5	5	4	3	3	3	5	6	7	5	3
MA-00120-582	MA-00120-582	5	3	3		1	5	3	3	2	5	1	3	4	5	4	3	4	3	2	3	3	4	4	2	2	5	4	3	2	2	2	2	1	3	0	1	2	3	3	3	2	2	2	2	1	2	2	1
MA-00120-584	MA-00120-584	1	1	1		1	1	1	1	1	1	1	0	0	0	1	1	1	0	1	0	0	0	0	0	0	0	0	0	0	0	0	1	1	1	1	0	0	0	1	1	1	0	1	0	0	0	0	0
MA-00120-590	MA-00120-590	44	44	44		1	44	44	44	31	30	28	30	32	30	34	28	29	28	26	31	30	32	29	27	29	28	32	36	33	29	33	35	31	30	28	30	32	30	34	28	29	28	26	31	30	32	29	27
MA-00120-593	MA-00120-593	11	6	6		1	11	6	6	7	6	6	7	6	8	6	6	5	6	5	7	11	7	7	7	7	7	6	5	7	6	5	5	2	1	1	2	1	3	1	1	0	1	1	2	6	2	2	2
MA-00120-595	MA-00120-595	1	1	1		1	1	1	1	1	1	1	1	1	1	1	1	1	1	0	1	0	1	1	0	1	1	1	1	1	1	1	1	1	1	1	1	1	1	1	1	1	1	0	1	0	1	1	0
MA-00120-599	MA-00120-599	4	4	4		1	4	4	4	2	3	2	3	2	3	2	1	0	1	0	1	2	2	2	3	2	2	3	2	1	1	2	3	2	3	2	3	2	3	2	1	0	1	0	1	2	2	2	3
MA-00120-610	MA-00120-610	9	2	2		1	9	2	2	7	8	8	7	8	7	8	8	7	8	7	6	8	9	8	7	8	9	8	7	7	8	6	7	1	1	1	1	2	1	1	1	1	2	1	1	1	2	1	0
MA-00120-611;MA-00111-72	MA-00120-611;MA-00111-72	7;6	7;6	7;6	;	2	7	7	7	6	7	6	6	5	6	6	7	7	6	6	7	7	7	7	7	6	7	6	7	6	7	6	7	6	7	6	6	5	6	6	7	7	6	6	7	7	7	7	7
MA-00120-612	MA-00120-612	1	1	1		1	1	1	1	0	1	1	0	0	0	1	1	0	1	0	1	1	1	0	0	0	1	0	0	0	0	1	0	0	1	1	0	0	0	1	1	0	1	0	1	1	1	0	0
MA-00120-619	MA-00120-619	6	2	2		1	6	2	2	6	6	6	5	5	5	5	6	6	6	5	6	5	5	5	5	5	5	5	5	5	6	5	5	2	2	2	1	1	1	1	2	2	2	1	2	1	1	1	1
MA-00120-71	MA-00120-71	1	1	1		1	1	1	1	0	0	0	1	0	1	0	0	0	1	0	0	1	1	1	1	1	1	1	0	0	0	1	0	0	0	0	1	0	1	0	0	0	1	0	0	1	1	1	1
MA-00120-72	MA-00120-72	4	4	4		1	4	4	4	2	2	1	2	2	3	2	2	2	4	2	3	2	0	0	1	3	3	1	2	3	3	2	2	2	2	1	2	2	3	2	2	2	4	2	3	2	0	0	1
MA-00120-73	MA-00120-73	3	3	3		1	3	3	3	1	2	2	1	2	3	2	1	2	1	0	1	1	0	0	1	2	3	2	2	1	2	3	2	1	2	2	1	2	3	2	1	2	1	0	1	1	0	0	1
MA-00120-79	MA-00120-79	2	2	2		1	2	2	2	0	0	0	1	0	0	0	1	1	0	0	1	1	0	0	0	1	1	0	1	1	0	0	1	0	0	0	1	0	0	0	1	1	0	0	1	1	0	0	0
MA-00120-81	MA-00120-81	8	2	2		1	8	2	2	5	6	5	5	4	7	2	5	2	3	2	3	2	5	3	3	5	4	5	5	5	5	4	6	1	1	1	1	1	1	0	1	1	1	1	0	1	1	1	1
MA-00120-86	MA-00120-86	19	19	19		1	19	19	19	11	11	9	13	11	12	11	13	9	11	10	9	14	13	12	10	12	13	13	14	9	9	12	13	11	11	9	13	11	12	11	13	9	11	10	9	14	13	12	10
MA-00120-88	MA-00120-88	24	24	24		1	24	24	24	19	22	19	20	22	18	19	21	18	18	21	17	21	21	21	18	23	20	21	22	19	19	21	19	19	22	19	20	22	18	19	21	18	18	21	17	21	21	21	18
MA-00120-9	MA-00120-9	1	1	1		1	1	1	1	1	0	0	0	0	1	1	1	0	0	0	0	0	1	0	0	0	0	0	1	0	0	0	0	1	0	0	0	0	1	1	1	0	0	0	0	0	1	0	0
MA-00120-91	MA-00120-91	1	1	1		1	1	1	1	1	1	1	1	1	1	1	1	1	1	1	1	0	1	1	0	1	1	1	1	1	1	1	1	1	1	1	1	1	1	1	1	1	1	1	1	0	1	1	0
MA-00120-95	MA-00120-95	28	19	19		1	28	19	19	25	22	26	25	22	25	25	25	23	22	24	24	25	26	27	25	24	23	23	25	24	24	24	24	17	16	18	18	15	17	17	17	15	15	16	17	16	18	18	17
MA-00120-97	MA-00120-97	24	24	23		1	24	24	23	18	17	15	19	18	19	17	21	16	16	15	17	14	19	17	13	15	17	18	19	19	18	17	17	18	17	15	19	18	19	17	21	16	16	15	17	14	19	17	13
MA-00125-1	MA-00125-1	4	4	4		1	4	4	4	2	2	2	2	2	2	2	1	3	3	2	2	4	2	2	2	2	3	2	2	2	2	2	3	2	2	2	2	2	2	2	1	3	3	2	2	4	2	2	2
MA-00130-12	MA-00130-12	3	3	3		1	3	3	3	3	1	1	1	2	2	0	1	2	2	2	2	1	1	2	2	2	1	2	2	2	2	1	3	3	1	1	1	2	2	0	1	2	2	2	2	1	1	2	2
MA-00132-1	MA-00132-1	7	7	7		1	7	7	7	7	7	6	7	6	6	7	7	5	7	6	6	4	1	4	3	5	6	4	4	4	5	7	7	7	7	6	7	6	6	7	7	5	7	6	6	4	1	4	3
MA-00133-4	MA-00133-4	2	2	2		1	2	2	2	2	2	2	2	2	2	2	2	2	2	2	2	1	2	2	1	2	2	2	2	2	2	2	2	2	2	2	2	2	2	2	2	2	2	2	2	1	2	2	1
MA-00134-2	MA-00134-2	1	1	1		1	1	1	1	0	0	0	1	1	0	0	0	0	1	1	1	0	0	1	1	0	1	0	0	0	0	0	0	0	0	0	1	1	0	0	0	0	1	1	1	0	0	1	1
MA-00134-3	MA-00134-3	5	5	5		1	5	5	5	2	4	2	1	2	3	3	3	2	2	4	3	4	3	3	3	3	3	3	3	0	1	1	0	2	4	2	1	2	3	3	3	2	2	4	3	4	3	3	3
MA-00139-100	MA-00139-100	29	29	29		1	29	29	29	25	25	27	26	25	27	27	26	26	24	24	26	28	27	28	26	26	27	26	27	26	27	26	26	25	25	27	26	25	27	27	26	26	24	24	26	28	27	28	26
MA-00139-101	MA-00139-101	25	25	25		1	25	25	25	22	22	22	22	23	22	22	23	21	20	23	20	22	22	22	22	22	22	23	23	22	22	22	23	22	22	22	22	23	22	22	23	21	20	23	20	22	22	22	22
MA-00139-104	MA-00139-104	14	14	14		1	14	14	14	9	11	9	10	11	8	10	10	5	7	7	9	9	12	11	7	10	10	11	11	9	10	10	10	9	11	9	10	11	8	10	10	5	7	7	9	9	12	11	7
MA-00139-106	MA-00139-106	6	6	6		1	6	6	6	3	4	3	4	4	4	5	6	5	6	5	5	4	3	4	4	4	5	4	4	4	4	5	4	3	4	3	4	4	4	5	6	5	6	5	5	4	3	4	4
MA-00139-117	MA-00139-117	4	4	4		1	4	4	4	4	4	4	4	4	4	4	4	4	4	3	4	4	3	3	4	3	2	3	3	4	4	4	4	4	4	4	4	4	4	4	4	4	4	3	4	4	3	3	4
MA-00139-119	MA-00139-119	16	16	16		1	16	16	16	9	9	8	10	8	12	10	9	12	10	10	10	9	7	8	8	12	8	11	9	11	8	11	7	9	9	8	10	8	12	10	9	12	10	10	10	9	7	8	8
MA-00139-126	MA-00139-126	2	2	2		1	2	2	2	1	2	1	1	2	2	1	1	1	1	1	2	1	1	1	1	2	1	1	1	2	1	1	1	1	2	1	1	2	2	1	1	1	1	1	2	1	1	1	1
MA-00139-127	MA-00139-127	2	2	2		1	2	2	2	1	1	2	1	1	1	1	1	2	2	2	2	1	2	2	2	1	1	2	2	2	2	1	1	1	1	2	1	1	1	1	1	2	2	2	2	1	2	2	2
MA-00139-128	MA-00139-128	2	2	2		1	2	2	2	1	2	1	1	1	2	2	1	1	1	1	1	0	1	0	1	0	0	1	1	1	1	1	0	1	2	1	1	1	2	2	1	1	1	1	1	0	1	0	1
MA-00139-133	MA-00139-133	9	9	9		1	9	9	9	2	3	1	3	2	3	3	2	4	3	4	5	2	6	4	5	1	1	4	5	1	1	1	2	2	3	1	3	2	3	3	2	4	3	4	5	2	6	4	5
MA-00139-142	MA-00139-142	3	3	3		1	3	3	3	1	0	0	1	0	0	0	0	1	1	0	0	0	0	1	2	0	0	0	0	0	0	0	0	1	0	0	1	0	0	0	0	1	1	0	0	0	0	1	2
MA-00139-143	MA-00139-143	10	10	10		1	10	10	10	8	8	7	9	7	7	5	5	6	6	7	6	8	7	7	7	9	7	6	8	8	8	7	9	8	8	7	9	7	7	5	5	6	6	7	6	8	7	7	7
MA-00139-152	MA-00139-152	2	2	2		1	2	2	2	0	1	1	0	0	1	1	1	1	1	1	0	0	1	1	0	1	1	1	2	0	1	1	1	0	1	1	0	0	1	1	1	1	1	1	0	0	1	1	0
MA-00139-157	MA-00139-157	20	20	20		1	20	20	20	12	13	16	15	13	13	11	12	10	8	10	9	16	17	17	16	13	18	17	19	14	12	17	16	12	13	16	15	13	13	11	12	10	8	10	9	16	17	17	16
MA-00139-158	MA-00139-158	25	25	25		1	25	25	25	19	20	13	19	17	15	17	19	16	20	17	13	16	11	12	13	11	17	13	15	18	15	18	18	19	20	13	19	17	15	17	19	16	20	17	13	16	11	12	13
MA-00139-159	MA-00139-159	12	12	12		1	12	12	12	3	7	4	5	5	3	5	5	3	1	1	3	7	9	9	9	9	9	8	11	7	9	7	8	3	7	4	5	5	3	5	5	3	1	1	3	7	9	9	9
MA-00139-161	MA-00139-161	9	9	9		1	9	9	9	6	4	2	5	5	5	4	5	5	5	3	6	5	6	6	5	5	5	6	5	6	5	4	6	6	4	2	5	5	5	4	5	5	5	3	6	5	6	6	5
MA-00139-165	MA-00139-165	17	17	13		1	17	17	13	6	9	8	7	10	11	12	9	11	10	9	9	15	15	10	14	12	11	10	10	8	8	9	9	6	9	8	7	10	11	12	9	11	10	9	9	15	15	10	14
MA-00139-172	MA-00139-172	9	6	6		1	9	6	6	4	5	4	6	5	4	6	2	2	2	3	2	1	5	5	1	4	4	4	5	5	4	5	5	2	3	2	3	2	2	4	0	0	0	1	0	0	4	4	0
MA-00139-173	MA-00139-173	2	2	2		1	2	2	2	2	2	2	2	2	2	2	2	2	2	2	2	1	1	0	0	2	2	1	2	2	2	2	2	2	2	2	2	2	2	2	2	2	2	2	2	1	1	0	0
MA-00139-177	MA-00139-177	2	2	2		1	2	2	2	1	1	0	0	0	1	0	0	0	0	0	0	0	0	0	0	1	0	0	0	1	1	0	1	1	1	0	0	0	1	0	0	0	0	0	0	0	0	0	0
MA-00139-180	MA-00139-180	2	2	2		1	2	2	2	0	0	0	0	0	0	0	0	0	0	0	0	1	0	1	1	0	0	0	0	0	0	0	0	0	0	0	0	0	0	0	0	0	0	0	0	1	0	1	1
MA-00139-181	MA-00139-181	1	1	1		1	1	1	1	1	1	1	0	1	0	1	1	0	0	1	1	1	1	1	1	1	1	0	1	1	1	1	1	1	1	1	0	1	0	1	1	0	0	1	1	1	1	1	1
MA-00139-182	MA-00139-182	13	13	12		1	13	13	12	7	7	5	6	7	5	6	7	0	1	0	0	8	11	10	8	6	7	11	10	8	7	9	10	7	7	5	6	7	5	6	7	0	1	0	0	8	11	10	8
MA-00139-183	MA-00139-183	2	2	2		1	2	2	2	0	0	0	0	0	0	1	0	0	0	0	1	2	1	1	1	1	1	1	1	0	0	0	0	0	0	0	0	0	0	1	0	0	0	0	1	2	1	1	1
MA-00139-187	MA-00139-187	3	2	2		1	3	2	2	0	0	0	0	0	0	0	0	0	0	0	0	2	2	2	1	1	1	1	0	0	0	0	0	0	0	0	0	0	0	0	0	0	0	0	0	1	2	2	1
MA-00139-189	MA-00139-189	35	35	27		1	35	35	27	22	24	24	26	26	22	24	25	16	14	18	19	26	28	30	28	29	26	29	31	27	26	25	27	22	24	24	26	26	22	24	25	16	14	18	19	26	28	30	28
MA-00139-195;MA-00139-197;MA-00139-175	MA-00139-195	3;1;1	3;1;1	3;1;1		3	3	3	3	0	2	0	1	0	0	1	0	2	2	0	1	0	0	0	0	1	0	0	0	1	0	0	0	0	2	0	1	0	0	1	0	2	2	0	1	0	0	0	0
MA-00139-196	MA-00139-196	2	2	2		1	2	2	2	1	1	1	1	1	1	2	1	2	2	2	2	0	0	0	0	0	0	0	0	1	2	1	0	1	1	1	1	1	1	2	1	2	2	2	2	0	0	0	0
MA-00139-199	MA-00139-199	4	4	4		1	4	4	4	2	1	3	2	2	2	3	3	2	2	3	3	3	3	2	2	2	2	2	3	2	2	2	2	2	1	3	2	2	2	3	3	2	2	3	3	3	3	2	2
MA-00139-20;MA-00323-97	MA-00139-20	38;2	38;2	38;2		2	38	38	38	31	31	31	33	32	33	33	32	33	29	29	32	25	29	30	27	34	29	31	33	34	29	32	34	31	31	31	33	32	33	33	32	33	29	29	32	25	29	30	27
MA-00139-200	MA-00139-200	4	4	4		1	4	4	4	1	0	1	1	3	3	2	1	2	2	3	1	2	1	1	1	0	1	1	2	1	1	0	0	1	0	1	1	3	3	2	1	2	2	3	1	2	1	1	1
MA-00139-201	MA-00139-201	4	4	4		1	4	4	4	3	3	4	4	4	3	3	3	3	3	3	3	4	4	4	3	4	4	3	3	4	4	3	4	3	3	4	4	4	3	3	3	3	3	3	3	4	4	4	3
MA-00139-203	MA-00139-203	1	1	1		1	1	1	1	0	0	0	0	0	0	0	0	0	0	0	0	0	1	1	0	0	0	1	1	0	0	0	0	0	0	0	0	0	0	0	0	0	0	0	0	0	1	1	0
MA-00139-208	MA-00139-208	3	3	3		1	3	3	3	1	2	1	3	3	2	3	1	1	2	2	2	1	0	2	0	1	1	1	2	2	3	3	3	1	2	1	3	3	2	3	1	1	2	2	2	1	0	2	0
MA-00139-210	MA-00139-210	17	17	12		1	17	17	12	10	5	6	9	9	12	12	8	7	7	9	11	6	6	6	6	6	5	7	8	6	8	10	10	10	5	6	9	9	12	12	8	7	7	9	11	6	6	6	6
MA-00139-211	MA-00139-211	1	1	1		1	1	1	1	1	1	1	1	0	0	1	1	0	1	1	1	0	0	0	0	0	0	0	0	1	1	0	1	1	1	1	1	0	0	1	1	0	1	1	1	0	0	0	0
MA-00139-218	MA-00139-218	1	1	1		1	1	1	1	1	1	1	0	1	0	1	1	0	0	0	0	0	1	1	0	1	1	0	0	0	0	1	0	1	1	1	0	1	0	1	1	0	0	0	0	0	1	1	0
MA-00139-22;MA-00270-182;MA-00112-298;MA-00270-151	MA-00139-22	190;1;1;1	188;1;1;1	173;0;0;0		4	190	188	173	4	3	3	4	3	7	2	1	4	2	5	0	153	177	177	150	103	107	109	126	10	13	9	9	4	3	3	4	3	7	2	1	4	2	5	0	151	175	175	148
MA-00139-220	MA-00139-220	7	7	7		1	7	7	7	0	0	0	1	2	0	1	1	0	2	1	1	4	1	1	1	0	0	0	1	1	0	1	2	0	0	0	1	2	0	1	1	0	2	1	1	4	1	1	1
MA-00139-224	MA-00139-224	16	16	16		1	16	16	16	9	7	8	8	12	9	8	10	10	7	10	9	9	9	9	8	9	9	7	7	11	9	11	12	9	7	8	8	12	9	8	10	10	7	10	9	9	9	9	8
MA-00139-226;MA-00139-225	MA-00139-226;MA-00139-225	4;2	4;2	3;1	;	2	4	4	3	0	0	0	0	2	0	1	0	0	0	0	0	1	0	0	0	1	0	0	0	1	1	0	1	0	0	0	0	2	0	1	0	0	0	0	0	1	0	0	0
MA-00139-232	MA-00139-232	7	7	7		1	7	7	7	1	2	4	4	3	3	4	3	1	2	3	1	2	2	4	1	1	3	5	2	1	1	3	2	1	2	4	4	3	3	4	3	1	2	3	1	2	2	4	1
MA-00139-235	MA-00139-235	2	1	1		1	2	1	1	1	1	1	2	2	1	1	2	0	0	1	0	1	0	1	1	1	1	2	1	1	0	1	1	1	1	1	1	1	1	1	1	0	0	0	0	0	0	1	0
MA-00139-237	MA-00139-237	15	15	15		1	15	15	15	9	11	12	13	13	11	11	10	11	10	11	11	13	13	13	14	14	14	14	15	12	11	10	10	9	11	12	13	13	11	11	10	11	10	11	11	13	13	13	14
MA-00139-24	MA-00139-24	3	3	3		1	3	3	3	2	1	1	1	1	2	1	1	0	0	0	0	0	2	1	0	0	0	1	2	0	0	2	1	2	1	1	1	1	2	1	1	0	0	0	0	0	2	1	0
MA-00139-241	MA-00139-241	1	1	1		1	1	1	1	0	1	0	1	1	1	1	1	1	0	0	1	1	1	1	0	1	1	1	1	1	1	1	1	0	1	0	1	1	1	1	1	1	0	0	1	1	1	1	0
MA-00139-243	MA-00139-243	5	5	5		1	5	5	5	4	4	1	3	3	3	1	3	1	3	1	1	1	3	1	1	0	1	2	2	2	2	2	3	4	4	1	3	3	3	1	3	1	3	1	1	1	3	1	1
MA-00139-245	MA-00139-245	23	23	23		1	23	23	23	18	19	18	20	21	21	20	20	17	16	18	17	16	22	20	18	20	20	21	21	19	20	20	20	18	19	18	20	21	21	20	20	17	16	18	17	16	22	20	18
MA-00139-250	MA-00139-250	1	1	1		1	1	1	1	1	1	0	1	1	1	1	1	1	1	1	1	0	1	1	0	1	1	1	1	1	1	0	1	1	1	0	1	1	1	1	1	1	1	1	1	0	1	1	0
MA-00139-251	MA-00139-251	16	16	6		1	16	16	6	14	11	12	12	10	12	11	11	12	12	12	11	9	12	8	10	11	11	10	13	11	10	13	13	14	11	12	12	10	12	11	11	12	12	12	11	9	12	8	10
MA-00139-252	MA-00139-252	30	30	20		1	30	30	20	9	12	5	11	6	10	8	6	5	3	6	2	24	26	27	25	24	26	23	25	16	17	19	17	9	12	5	11	6	10	8	6	5	3	6	2	24	26	27	25
MA-00139-254	MA-00139-254	9	9	9		1	9	9	9	5	6	6	6	8	7	6	6	8	6	9	8	6	5	5	4	7	7	7	8	8	7	7	7	5	6	6	6	8	7	6	6	8	6	9	8	6	5	5	4
MA-00139-262	MA-00139-262	16	16	16		1	16	16	16	10	10	10	11	11	9	9	11	9	10	11	12	3	3	3	1	2	3	3	3	7	12	12	9	10	10	10	11	11	9	9	11	9	10	11	12	3	3	3	1
MA-00139-265	MA-00139-265	2	2	2		1	2	2	2	2	2	1	2	2	2	2	1	1	1	1	1	0	0	0	0	0	0	0	0	0	1	0	1	2	2	1	2	2	2	2	1	1	1	1	1	0	0	0	0
MA-00139-266	MA-00139-266	15	15	3		1	15	15	3	11	12	8	9	9	11	10	11	9	8	9	8	9	10	12	11	12	12	10	10	11	12	11	11	11	12	8	9	9	11	10	11	9	8	9	8	9	10	12	11
MA-00139-27	MA-00139-27	16	16	16		1	16	16	16	14	15	15	13	14	12	16	15	13	12	12	15	12	16	16	12	15	16	15	16	15	15	15	15	14	15	15	13	14	12	16	15	13	12	12	15	12	16	16	12
MA-00139-270	MA-00139-270	5	5	5		1	5	5	5	0	1	0	0	0	1	0	0	0	1	0	0	0	2	1	2	0	1	1	1	1	0	0	0	0	1	0	0	0	1	0	0	0	1	0	0	0	2	1	2
MA-00139-271;REV__MA-00101-483	MA-00139-271	20;1	20;1	20;1		2	20	20	20	12	11	11	15	13	12	14	10	8	9	9	10	13	6	13	9	12	12	13	16	9	12	15	15	12	11	11	15	13	12	14	10	8	9	9	10	13	6	13	9
MA-00139-273	MA-00139-273	22	22	22		1	22	22	22	9	11	8	12	12	9	11	13	10	12	11	12	15	14	13	15	12	13	11	14	13	15	9	11	9	11	8	12	12	9	11	13	10	12	11	12	15	14	13	15
MA-00139-278;MA-00055-24;MA-00326-71	MA-00139-278	11;4;2	11;4;2	7;0;0		3	11	11	7	6	3	5	4	5	7	7	7	4	6	6	6	4	4	5	4	4	1	3	5	4	4	6	5	6	3	5	4	5	7	7	7	4	6	6	6	4	4	5	4
MA-00139-284	MA-00139-284	6	5	5		1	6	5	5	4	3	4	3	3	4	3	5	4	3	3	4	3	4	2	4	3	3	2	2	4	3	4	4	4	3	4	3	3	4	3	5	4	2	3	4	3	4	2	4
MA-00139-291	MA-00139-291	29	29	29		1	29	29	29	23	21	17	22	17	17	18	19	17	14	12	13	21	25	25	21	25	25	24	26	25	22	24	25	23	21	17	22	17	17	18	19	17	14	12	13	21	25	25	21
MA-00139-294	MA-00139-294	6	6	6		1	6	6	6	4	3	5	3	3	2	3	4	3	2	1	2	5	5	6	6	6	4	4	5	4	4	4	5	4	3	5	3	3	2	3	4	3	2	1	2	5	5	6	6
MA-00139-295	MA-00139-295	14	14	14		1	14	14	14	6	3	3	4	4	7	4	2	5	2	3	5	8	8	4	7	8	11	6	10	4	5	5	3	6	3	3	4	4	7	4	2	5	2	3	5	8	8	4	7
MA-00139-298	MA-00139-298	12	11	11		1	12	11	11	12	11	10	10	11	10	11	10	10	9	9	10	11	11	11	10	11	11	11	10	10	11	11	11	11	10	9	9	10	9	10	9	9	8	8	9	10	10	10	9
MA-00139-299	MA-00139-299	12	12	12		1	12	12	12	7	11	9	11	8	8	8	10	4	6	8	9	10	9	10	10	11	10	10	12	9	11	9	11	7	11	9	11	8	8	8	10	4	6	8	9	10	9	10	10
MA-00139-300;MA-00189-8	MA-00139-300	3;1	3;1	3;1		2	3	3	3	0	0	0	0	0	1	1	0	1	0	0	0	0	0	1	1	0	0	0	1	1	0	0	0	0	0	0	0	0	1	1	0	1	0	0	0	0	0	1	1
MA-00139-304	MA-00139-304	19	19	19		1	19	19	19	15	14	12	15	14	17	18	16	12	12	14	15	13	16	16	11	14	15	15	16	15	15	14	15	15	14	12	15	14	17	18	16	12	12	14	15	13	16	16	11
MA-00139-306	MA-00139-306	5	4	4		1	5	4	4	2	2	3	1	3	4	2	3	3	2	3	2	0	0	0	0	1	1	1	1	1	1	2	2	1	1	2	1	2	3	1	2	2	1	2	1	0	0	0	0
MA-00139-307	MA-00139-307	5	5	5		1	5	5	5	5	3	2	4	5	5	3	5	5	5	5	4	2	2	2	3	4	3	4	3	4	2	5	5	5	3	2	4	5	5	3	5	5	5	5	4	2	2	2	3
MA-00139-309	MA-00139-309	3	3	3		1	3	3	3	0	1	0	1	2	2	2	1	1	1	1	1	0	1	0	0	0	0	0	1	0	0	0	1	0	1	0	1	2	2	2	1	1	1	1	1	0	1	0	0
MA-00139-31	MA-00139-31	2	2	2		1	2	2	2	1	0	1	0	1	1	0	1	0	0	0	0	0	1	0	1	0	0	1	0	0	1	0	1	1	0	1	0	1	1	0	1	0	0	0	0	0	1	0	1
MA-00139-311	MA-00139-311	7	5	5		1	7	5	5	2	3	3	5	5	5	2	5	4	2	3	3	4	3	1	3	3	3	3	5	2	4	4	5	1	2	2	4	4	3	1	4	3	1	2	2	3	1	0	1
MA-00139-312	MA-00139-312	1	1	1		1	1	1	1	0	0	0	0	1	0	0	0	0	0	0	0	0	0	1	0	0	0	0	1	0	0	0	0	0	0	0	0	1	0	0	0	0	0	0	0	0	0	1	0
MA-00139-316	MA-00139-316	4	4	4		1	4	4	4	2	1	3	3	3	2	3	2	2	2	2	1	1	1	2	1	1	2	3	1	3	2	2	2	2	1	3	3	3	2	3	2	2	2	2	1	1	1	2	1
MA-00139-319	MA-00139-319	2	2	2		1	2	2	2	0	2	0	1	0	2	1	0	1	1	1	1	1	0	0	1	1	0	0	0	1	1	2	2	0	2	0	1	0	2	1	0	1	1	1	1	1	0	0	1
MA-00139-32	MA-00139-32	46	46	46		1	46	46	46	23	26	22	23	23	28	21	22	20	21	21	23	33	39	37	33	35	35	36	39	27	25	26	29	23	26	22	23	23	28	21	22	20	21	21	23	33	39	37	33
MA-00139-325	MA-00139-325	5	5	5		1	5	5	5	2	0	0	1	1	2	1	1	2	1	1	1	0	2	2	1	1	1	1	0	1	3	1	1	2	0	0	1	1	2	1	1	2	1	1	1	0	2	2	1
MA-00139-328	MA-00139-328	2	2	2		1	2	2	2	0	0	0	0	0	0	0	0	0	0	0	0	2	1	2	2	2	2	2	2	1	0	0	1	0	0	0	0	0	0	0	0	0	0	0	0	2	1	2	2
MA-00139-329	MA-00139-329	1	1	1		1	1	1	1	0	0	0	0	0	0	0	0	0	0	1	0	0	0	0	0	0	0	0	0	0	0	0	0	0	0	0	0	0	0	0	0	0	0	1	0	0	0	0	0
MA-00139-331	MA-00139-331	20	20	20		1	20	20	20	4	5	5	6	6	6	6	4	3	5	5	4	11	19	16	14	13	15	15	19	10	9	11	9	4	5	5	6	6	6	6	4	3	5	5	4	11	19	16	14
MA-00139-335;MA-00297-316	MA-00139-335	7;1	7;1	7;1		2	7	7	7	6	5	4	6	4	4	4	2	1	1	2	1	6	5	6	6	6	5	6	7	6	7	6	7	6	5	4	6	4	4	4	2	1	1	2	1	6	5	6	6
MA-00139-336	MA-00139-336	3	3	3		1	3	3	3	2	1	1	2	1	2	1	1	1	2	2	2	1	1	1	1	2	2	1	1	0	2	0	2	2	1	1	2	1	2	1	1	1	2	2	2	1	1	1	1
MA-00139-338	MA-00139-338	3	3	3		1	3	3	3	1	1	1	1	0	0	0	1	0	0	0	1	2	2	3	2	2	2	2	1	1	2	1	1	1	1	1	1	0	0	0	1	0	0	0	1	2	2	3	2
MA-00139-34	MA-00139-34	2	2	2		1	2	2	2	0	1	1	1	1	0	1	1	0	0	0	0	0	1	0	0	0	0	1	0	1	0	0	1	0	1	1	1	1	0	1	1	0	0	0	0	0	1	0	0
MA-00139-340	MA-00139-340	1	1	1		1	1	1	1	0	0	0	0	0	0	0	0	0	0	0	0	1	1	0	0	0	0	0	1	0	0	0	1	0	0	0	0	0	0	0	0	0	0	0	0	1	1	0	0
MA-00139-341	MA-00139-341	2	2	2		1	2	2	2	1	0	1	0	1	0	1	1	1	0	1	0	1	2	1	1	1	0	1	2	0	0	1	1	1	0	1	0	1	0	1	1	1	0	1	0	1	2	1	1
MA-00139-342	MA-00139-342	10	10	10		1	10	10	10	6	7	5	6	8	6	7	8	8	8	7	9	3	4	3	3	5	3	2	7	5	7	6	7	6	7	5	6	8	6	7	8	8	8	7	9	3	4	3	3
MA-00139-348	MA-00139-348	2	2	2		1	2	2	2	2	2	1	1	1	1	1	1	1	1	1	0	0	0	0	0	0	0	0	0	2	1	2	1	2	2	1	1	1	1	1	1	1	1	1	0	0	0	0	0
MA-00139-351	MA-00139-351	7	7	7		1	7	7	7	4	4	3	4	3	4	3	2	5	3	2	4	3	2	2	4	3	2	1	3	3	3	3	4	4	4	3	4	3	4	3	2	5	3	2	4	3	2	2	4
MA-00139-353	MA-00139-353	2	2	2		1	2	2	2	1	1	0	1	1	1	1	2	1	1	1	1	1	1	1	1	1	1	1	1	1	1	1	1	1	1	0	1	1	1	1	2	1	1	1	1	1	1	1	1
MA-00139-354	MA-00139-354	8	8	8		1	8	8	8	5	4	4	4	3	7	4	1	7	4	6	5	4	3	4	8	4	4	5	3	3	3	5	4	5	4	4	4	3	7	4	1	7	4	6	5	4	3	4	8
MA-00139-358	MA-00139-358	20	20	20		1	20	20	20	18	15	13	17	19	14	14	15	16	13	11	15	6	6	2	6	7	7	8	6	9	10	14	12	18	15	13	17	19	14	14	15	16	13	11	15	6	6	2	6
MA-00139-360	MA-00139-360	14	14	14		1	14	14	14	12	11	8	11	12	11	11	11	9	10	11	10	9	12	12	10	9	11	12	12	10	11	11	14	12	11	8	11	12	11	11	11	9	10	11	10	9	12	12	10
MA-00139-362	MA-00139-362	5	5	5		1	5	5	5	0	0	0	1	0	0	0	0	3	0	1	1	3	2	2	3	3	1	1	3	1	0	0	1	0	0	0	1	0	0	0	0	3	0	1	1	3	2	2	3
MA-00139-363	MA-00139-363	9	9	9		1	9	9	9	3	1	3	1	4	3	3	2	2	0	1	1	5	6	4	4	7	8	6	8	6	7	6	4	3	1	3	1	4	3	3	2	2	0	1	1	5	6	4	4
MA-00139-364	MA-00139-364	46	46	46		1	46	46	46	33	31	28	30	37	28	34	29	29	28	27	30	32	33	35	29	35	33	33	35	29	33	35	32	33	31	28	30	37	28	34	29	29	28	27	30	32	33	35	29
MA-00139-366	MA-00139-366	4	4	4		1	4	4	4	1	1	0	1	1	3	2	1	0	0	0	1	1	3	0	0	0	1	2	1	1	1	1	2	1	1	0	1	1	3	2	1	0	0	0	1	1	3	0	0
MA-00139-367	MA-00139-367	3	3	3		1	3	3	3	1	1	1	1	0	2	1	0	0	0	0	1	0	0	0	0	0	0	0	0	1	0	1	1	1	1	1	1	0	2	1	0	0	0	0	1	0	0	0	0
MA-00139-368	MA-00139-368	33	33	33		1	33	33	33	9	14	13	13	8	14	14	12	12	7	9	10	28	19	20	20	19	23	15	22	12	13	16	16	9	14	13	13	8	14	14	12	12	7	9	10	28	19	20	20
MA-00139-371;MA-00139-372	MA-00139-371	19;1	19;1	19;1		2	19	19	19	4	1	4	2	3	3	3	4	2	2	1	2	11	15	14	11	14	11	11	14	6	9	5	7	4	1	4	2	3	3	3	4	2	2	1	2	11	15	14	11
MA-00139-373	MA-00139-373	4	4	4		1	4	4	4	2	0	0	3	3	2	3	2	1	2	3	4	0	1	0	0	1	1	1	2	1	1	3	1	2	0	0	3	3	2	3	2	1	2	3	4	0	1	0	0
MA-00139-375	MA-00139-375	5	5	5		1	5	5	5	3	1	2	2	3	3	3	2	2	1	1	0	2	3	2	3	2	2	2	3	2	2	4	3	3	1	2	2	3	3	3	2	2	1	1	0	2	3	2	3
MA-00139-385	MA-00139-385	5	5	5		1	5	5	5	0	0	0	0	0	1	1	0	1	0	1	0	1	1	1	2	0	1	0	1	2	1	1	1	0	0	0	0	0	1	1	0	1	0	1	0	1	1	1	2
MA-00139-388	MA-00139-388	14	14	14		1	14	14	14	9	11	10	10	9	10	9	8	8	9	5	8	8	10	9	8	10	12	10	11	8	12	10	10	9	11	10	10	9	10	9	8	8	9	5	8	8	10	9	8
MA-00139-389	MA-00139-389	7	7	7		1	7	7	7	3	3	5	3	3	4	5	4	4	4	4	5	5	4	5	3	5	4	4	3	4	5	4	4	3	3	5	3	3	4	5	4	4	4	4	5	5	4	5	3
MA-00139-392	MA-00139-392	9	9	9		1	9	9	9	9	6	7	6	7	8	5	6	9	8	9	8	1	1	2	2	3	4	2	5	7	6	7	6	9	6	7	6	7	8	5	6	9	8	9	8	1	1	2	2
MA-00139-41	MA-00139-41	8	8	8		1	8	8	8	3	5	6	5	4	6	6	6	5	7	4	5	4	5	4	3	4	4	2	6	6	5	5	5	3	5	6	5	4	6	6	6	5	7	4	5	4	5	4	3
MA-00139-42	MA-00139-42	7	7	6		1	7	7	6	4	1	4	3	4	3	5	4	3	2	4	4	1	1	2	2	1	3	3	3	2	2	3	3	4	1	4	3	4	3	5	4	3	2	4	4	1	1	2	2
MA-00139-45	MA-00139-45	7	7	7		1	7	7	7	0	0	0	0	1	1	0	0	0	1	0	0	4	3	4	3	3	4	3	4	2	2	3	0	0	0	0	0	1	1	0	0	0	1	0	0	4	3	4	3
MA-00139-46	MA-00139-46	1	1	1		1	1	1	1	1	0	0	1	0	1	0	0	0	1	0	0	0	1	1	1	1	0	0	1	1	1	0	0	1	0	0	1	0	1	0	0	0	1	0	0	0	1	1	1
MA-00139-47;MA-00049-4	MA-00139-47;MA-00049-4	2;1	2;1	2;1	;	2	2	2	2	1	2	2	0	2	2	2	1	1	1	2	1	1	1	1	1	1	2	1	1	1	1	1	1	1	2	2	0	2	2	2	1	1	1	2	1	1	1	1	1
MA-00139-53	MA-00139-53	7	7	7		1	7	7	7	5	4	4	3	2	3	3	4	3	3	4	3	5	3	5	5	5	4	5	5	3	5	3	4	5	4	4	3	2	3	3	4	3	3	4	3	5	3	5	5
MA-00139-55	MA-00139-55	1	1	1		1	1	1	1	1	1	0	1	0	1	1	1	1	1	1	1	0	0	0	0	1	0	0	0	1	1	1	1	1	1	0	1	0	1	1	1	1	1	1	1	0	0	0	0
MA-00139-56	MA-00139-56	9	9	9		1	9	9	9	6	7	3	5	6	5	5	6	7	7	8	8	4	2	5	4	3	3	4	3	3	6	6	5	6	7	3	5	6	5	5	6	7	7	8	8	4	2	5	4
MA-00139-6	MA-00139-6	2	2	2		1	2	2	2	1	1	1	0	0	1	0	0	0	0	0	0	1	1	1	1	2	1	1	0	1	0	1	0	1	1	1	0	0	1	0	0	0	0	0	0	1	1	1	1
MA-00139-68	MA-00139-68	14	14	14		1	14	14	14	11	11	12	12	11	12	11	11	8	10	8	9	10	13	14	11	13	11	11	10	11	11	12	11	11	11	12	12	11	12	11	11	8	10	8	9	10	13	14	11
MA-00139-69	MA-00139-69	9	9	9		1	9	9	9	6	7	5	7	5	8	5	4	8	4	6	8	4	7	7	5	5	5	6	5	7	4	7	7	6	7	5	7	5	8	5	4	8	4	6	8	4	7	7	5
MA-00139-75	MA-00139-75	16	16	16		1	16	16	16	6	5	8	6	4	3	4	3	1	1	3	2	12	14	15	14	13	12	13	15	11	8	9	9	6	5	8	6	4	3	4	3	1	1	3	2	12	14	15	14
MA-00139-77	MA-00139-77	13	13	5		1	13	13	5	6	7	6	7	8	9	8	7	8	6	7	7	7	9	8	8	7	8	8	10	9	6	6	9	6	7	6	7	8	9	8	7	8	6	7	7	7	9	8	8
MA-00139-78	MA-00139-78	6	6	5		1	6	6	5	2	3	1	2	2	2	3	3	1	2	3	1	5	2	3	4	4	4	3	4	3	4	4	2	2	3	1	2	2	2	3	3	1	2	3	1	5	2	3	4
MA-00139-8	MA-00139-8	11	11	3		1	11	11	3	3	3	6	2	10	9	9	5	5	7	6	4	3	7	7	3	5	4	6	6	1	3	3	3	3	3	6	2	10	9	9	5	5	7	6	4	3	7	7	3
MA-00139-86	MA-00139-86	5	5	5		1	5	5	5	0	1	0	0	1	1	2	0	1	1	0	0	3	3	2	3	3	2	2	4	0	0	2	2	0	1	0	0	1	1	2	0	1	1	0	0	3	3	2	3
MA-00139-91	MA-00139-91	1	1	1		1	1	1	1	1	1	1	1	1	1	1	1	1	1	0	1	1	0	1	0	1	0	1	1	1	1	1	1	1	1	1	1	1	1	1	1	1	1	0	1	1	0	1	0
MA-00139-93	MA-00139-93	9	9	9		1	9	9	9	6	7	9	7	8	7	7	8	7	6	9	8	7	7	7	7	7	7	8	7	6	7	8	8	6	7	9	7	8	7	7	8	7	6	9	8	7	7	7	7
MA-00139-94	MA-00139-94	4	4	4		1	4	4	4	0	1	0	2	1	0	2	0	1	0	0	0	4	3	3	3	4	3	2	2	2	3	1	2	0	1	0	2	1	0	2	0	1	0	0	0	4	3	3	3
MA-00139-95	MA-00139-95	14	14	9		1	14	14	9	4	3	3	3	3	4	4	3	2	2	3	4	12	10	11	9	9	11	11	10	5	5	4	5	4	3	3	3	3	4	4	3	2	2	3	4	12	10	11	9
MA-00139-99	MA-00139-99	6	6	6		1	6	6	6	3	4	3	5	2	4	3	3	3	1	2	4	3	1	4	2	3	4	3	2	4	5	3	5	3	4	3	5	2	4	3	3	3	1	2	4	3	1	4	2
MA-00140-2	MA-00140-2	2	2	2		1	2	2	2	0	0	0	0	0	0	0	0	0	1	0	0	0	2	1	1	1	0	1	1	0	2	0	1	0	0	0	0	0	0	0	0	0	1	0	0	0	2	1	1
MA-00142-1	MA-00142-1	10	10	9		1	10	10	9	6	7	7	8	9	9	8	8	5	5	7	7	4	6	6	6	6	5	6	6	7	7	7	7	6	7	7	8	9	9	8	8	5	5	7	7	4	6	6	6
MA-00142-2	MA-00142-2	2	2	2		1	2	2	2	2	0	1	1	1	0	1	1	0	1	0	1	0	2	2	1	0	1	2	1	1	1	1	0	2	0	1	1	1	0	1	1	0	1	0	1	0	2	2	1
MA-00150-3	MA-00150-3	20	20	20		1	20	20	20	18	14	13	16	15	16	15	14	11	12	12	15	12	15	17	10	12	15	14	17	16	14	17	16	18	14	13	16	15	16	15	14	11	12	12	15	12	15	17	10
MA-00152-3	MA-00152-3	3	3	3		1	3	3	3	0	2	0	0	0	0	0	1	0	1	1	0	1	1	0	0	1	0	1	1	1	0	1	0	0	2	0	0	0	0	0	1	0	1	1	0	1	1	0	0
MA-00153-10	MA-00153-10	5	5	5		1	5	5	5	3	1	3	3	2	1	1	3	3	1	3	2	3	3	2	3	1	0	1	2	1	1	3	3	3	1	3	3	2	1	1	3	3	1	3	2	3	3	2	3
MA-00153-105	MA-00153-105	3	3	3		1	3	3	3	0	1	0	1	1	1	1	1	0	0	0	0	0	0	2	0	1	2	0	0	3	3	0	1	0	1	0	1	1	1	1	1	0	0	0	0	0	0	2	0
MA-00153-106	MA-00153-106	3	3	3		1	3	3	3	2	1	2	1	1	2	3	2	0	0	1	1	0	1	1	0	2	2	2	2	1	1	2	1	2	1	2	1	1	2	3	2	0	0	1	1	0	1	1	0
MA-00184-271;MA-00153-107	MA-00184-271;MA-00153-107	9;9	3;3	3;3	;	2	9	3	3	5	6	7	6	6	5	5	6	7	6	7	8	7	7	7	6	7	6	7	7	6	6	6	6	0	1	2	1	1	0	1	1	2	1	1	2	3	2	2	1
MA-00153-111	MA-00153-111	6	6	6		1	6	6	6	3	4	0	2	3	3	4	3	1	2	2	1	0	2	2	1	1	2	3	3	2	3	4	3	3	4	0	2	3	3	4	3	1	2	2	1	0	2	2	1
MA-00153-112	MA-00153-112	17	17	17		1	17	17	17	11	13	12	10	10	9	10	8	9	7	8	9	12	10	13	9	9	9	12	14	10	11	10	12	11	13	12	10	10	9	10	8	9	7	8	9	12	10	13	9
MA-00153-115	MA-00153-115	4	4	4		1	4	4	4	0	0	1	0	2	1	2	1	0	0	0	0	1	2	3	3	3	2	1	3	1	0	1	2	0	0	1	0	2	1	2	1	0	0	0	0	1	2	3	3
MA-00153-116	MA-00153-116	12	12	11		1	12	12	11	7	8	6	7	7	6	7	7	6	6	6	6	6	7	7	7	6	4	6	5	7	4	6	7	7	8	6	7	7	6	7	7	6	6	6	6	6	7	7	7
MA-00184-481;MA-00153-117	MA-00184-481;MA-00153-117	4;4	2;2	2;2	;	2	4	2	2	3	3	3	3	4	4	4	3	3	4	3	4	3	4	4	4	4	3	3	3	4	2	3	3	2	2	2	2	2	2	2	2	2	2	2	2	2	2	2	2
MA-00153-121	MA-00153-121	6	6	6		1	6	6	6	2	1	1	1	1	1	1	0	1	1	0	0	4	2	5	4	5	4	5	5	4	4	5	3	2	1	1	1	1	1	1	0	1	1	0	0	4	2	5	4
MA-00153-123	MA-00153-123	5	5	5		1	5	5	5	1	1	1	2	2	1	3	1	2	2	3	1	1	0	1	0	1	0	0	1	1	0	1	0	1	1	1	2	2	1	3	1	2	2	3	1	1	0	1	0
MA-00153-124	MA-00153-124	2	2	2		1	2	2	2	1	1	1	2	1	1	0	1	1	1	1	0	0	0	0	0	0	0	0	0	1	1	1	1	1	1	1	2	1	1	0	1	1	1	1	0	0	0	0	0
MA-00153-126	MA-00153-126	27	15	15		1	27	15	15	18	17	18	20	20	20	17	22	15	13	16	17	19	19	21	21	20	18	17	19	18	21	21	19	9	8	8	9	10	9	8	10	8	7	8	9	12	10	10	10
MA-00153-132	MA-00153-132	24	24	17		1	24	24	17	16	14	18	15	16	16	15	19	16	12	16	14	16	15	16	12	15	16	16	16	17	14	18	18	16	14	18	15	16	16	15	19	16	12	16	14	16	15	16	12
MA-00153-133	MA-00153-133	7	7	7		1	7	7	7	7	6	5	5	7	5	6	6	4	4	4	4	4	4	4	1	5	1	5	2	4	4	5	5	7	6	5	5	7	5	6	6	4	4	4	4	4	4	4	1
MA-00153-134	MA-00153-134	7	7	7		1	7	7	7	6	6	7	6	6	5	5	5	4	5	5	5	5	5	6	4	4	7	5	5	6	7	7	7	6	6	7	6	6	5	5	5	4	5	5	5	5	5	6	4
MA-00153-136	MA-00153-136	3	3	3		1	3	3	3	1	1	2	1	2	1	2	0	1	1	2	1	3	2	1	2	1	2	2	2	1	1	2	2	1	1	2	1	2	1	2	0	1	1	2	1	3	2	1	2
MA-00153-141;MA-00184-286	MA-00153-141	7;1	7;1	7;1		2	7	7	7	2	5	3	2	3	4	4	4	2	2	5	3	3	0	1	0	4	4	2	3	3	3	2	4	2	5	3	2	3	4	4	4	2	2	5	3	3	0	1	0
MA-00153-146	MA-00153-146	2	2	2		1	2	2	2	1	2	1	1	1	2	2	1	1	2	0	1	1	1	0	0	1	1	0	2	1	0	1	2	1	2	1	1	1	2	2	1	1	2	0	1	1	1	0	0
MA-00153-149	MA-00153-149	6	6	6		1	6	6	6	5	4	6	3	5	4	3	3	4	3	3	4	1	1	1	1	3	3	2	3	4	5	5	4	5	4	6	3	5	4	3	3	4	3	3	4	1	1	1	1
MA-00153-159	MA-00153-159	17	17	17		1	17	17	17	14	12	13	12	12	13	12	11	13	14	13	14	7	8	7	7	8	5	8	9	9	12	13	12	14	12	13	12	12	13	12	11	13	14	13	14	7	8	7	7
MA-00184-579;MA-00184-173;MA-00153-16	MA-00184-579;MA-00184-173;MA-00153-16	7;7;7	7;7;7	7;7;7	;;	3	7	7	7	6	6	6	5	7	6	6	6	6	6	6	6	5	5	5	5	4	5	5	5	5	5	5	5	6	6	6	5	7	6	6	6	6	6	6	6	5	5	5	5
MA-00153-161	MA-00153-161	9	9	7		1	9	9	7	3	5	5	7	6	7	6	6	5	4	6	4	6	6	5	7	7	7	6	9	6	7	7	5	3	5	5	7	6	7	6	6	5	4	6	4	6	6	5	7
MA-00153-169	MA-00153-169	1	1	1		1	1	1	1	0	0	0	0	0	0	0	0	0	0	1	1	0	0	0	0	0	0	0	0	0	0	0	0	0	0	0	0	0	0	0	0	0	0	1	1	0	0	0	0
MA-00153-171;MA-00184-308	MA-00153-171;MA-00184-308	12;10	12;10	12;10	;	2	12	12	12	4	2	2	3	4	3	5	4	4	4	5	2	7	6	5	6	8	6	7	5	6	4	5	4	4	2	2	3	4	3	5	4	4	4	5	2	7	6	5	6
MA-00153-172	MA-00153-172	3	3	3		1	3	3	3	0	1	1	1	1	2	0	1	2	1	1	2	2	2	1	1	0	2	1	1	0	0	1	0	0	1	1	1	1	2	0	1	2	1	1	2	2	2	1	1
MA-00153-177	MA-00153-177	15	15	15		1	15	15	15	6	5	6	7	6	4	7	8	8	7	5	6	7	6	11	11	7	6	7	8	9	8	9	10	6	5	6	7	6	4	7	8	8	7	5	6	7	6	11	11
MA-00153-179	MA-00153-179	2	2	2		1	2	2	2	0	2	0	0	1	0	0	0	0	0	0	0	0	0	0	1	0	1	0	1	0	1	0	0	0	2	0	0	1	0	0	0	0	0	0	0	0	0	0	1
MA-00303-15;MA-00184-574;MA-00153-18	MA-00303-15;MA-00184-574;MA-00153-18	6;6;6	6;6;6	6;6;6	;;	3	6	6	6	3	3	4	2	4	5	4	4	4	4	3	3	2	4	4	1	3	3	4	5	2	3	4	2	3	3	4	2	4	5	4	4	4	4	3	3	2	4	4	1
MA-00153-182	MA-00153-182	2	2	2		1	2	2	2	2	2	2	2	2	2	2	2	2	1	2	2	2	2	2	2	2	2	2	2	2	2	2	2	2	2	2	2	2	2	2	2	2	1	2	2	2	2	2	2
MA-00153-185	MA-00153-185	16	1	1		1	16	1	1	14	14	14	15	15	15	15	14	13	13	13	13	14	15	15	15	12	13	15	14	15	14	14	16	1	1	1	1	1	1	1	1	1	1	1	0	1	1	1	1
MA-00153-186	MA-00153-186	42	42	13		1	42	42	13	33	36	37	35	35	35	35	34	33	28	31	30	37	38	40	33	36	38	40	40	35	38	38	37	33	36	37	35	35	35	35	34	33	28	31	30	37	38	40	33
MA-00153-189	MA-00153-189	3	3	3		1	3	3	3	1	1	1	1	3	3	3	2	3	2	2	2	1	1	3	3	1	3	2	0	2	1	2	2	1	1	1	1	3	3	3	2	3	2	2	2	1	1	3	3
MA-00184-573;MA-00153-19	MA-00184-573;MA-00153-19	5;5	5;5	3;3	;	2	5	5	3	5	4	4	4	5	5	5	4	5	4	5	5	4	4	4	3	4	3	4	4	4	4	4	5	5	4	4	4	5	5	5	4	5	4	5	5	4	4	4	3
MA-00184-394;MA-00153-190	MA-00184-394;MA-00153-190	9;9	9;9	9;9	;	2	9	9	9	7	8	7	8	8	8	8	8	7	8	7	7	5	7	6	8	7	7	6	6	8	6	7	6	7	8	7	8	8	8	8	8	7	8	7	7	5	7	6	8
MA-00153-196	MA-00153-196	1	1	1		1	1	1	1	0	0	0	0	0	0	0	0	0	0	0	0	0	0	0	0	0	0	1	0	0	0	0	0	0	0	0	0	0	0	0	0	0	0	0	0	0	0	0	0
MA-00153-20	MA-00153-20	21	21	21		1	21	21	21	6	6	3	6	6	7	6	6	6	5	6	5	17	14	12	14	14	12	13	13	6	9	11	6	6	6	3	6	6	7	6	6	6	5	6	5	17	14	12	14
MA-00153-200	MA-00153-200	1	1	1		1	1	1	1	0	1	0	1	0	0	1	0	0	0	0	0	0	0	0	0	0	0	0	0	0	0	1	0	0	1	0	1	0	0	1	0	0	0	0	0	0	0	0	0
MA-00153-205	MA-00153-205	14	14	14		1	14	14	14	11	11	8	11	12	10	9	9	11	9	9	11	13	13	13	13	13	13	12	13	12	11	11	11	11	11	8	11	12	10	9	9	11	9	9	11	13	13	13	13
MA-00153-208	MA-00153-208	18	17	17		1	18	17	17	12	11	8	10	11	11	10	12	8	10	8	7	14	15	15	14	12	9	11	13	14	10	10	12	11	10	7	9	10	10	9	11	7	9	7	6	13	14	14	13
MA-00153-212	MA-00153-212	2	2	2		1	2	2	2	0	0	0	2	1	2	0	0	0	0	0	0	1	1	0	0	0	1	1	1	0	0	0	0	0	0	0	2	1	2	0	0	0	0	0	0	1	1	0	0
MA-00153-215	MA-00153-215	14	14	14		1	14	14	14	10	10	10	11	10	11	12	10	10	10	9	11	10	12	10	10	10	10	11	12	10	10	9	10	10	10	10	11	10	11	12	10	10	10	9	11	10	12	10	10
MA-00153-217	MA-00153-217	2	2	2		1	2	2	2	2	2	0	2	2	2	2	2	2	1	2	2	2	2	2	2	2	2	2	2	2	2	2	2	2	2	0	2	2	2	2	2	2	1	2	2	2	2	2	2
MA-00153-218	MA-00153-218	2	2	2		1	2	2	2	1	1	1	1	1	1	1	1	1	1	2	2	1	2	2	1	2	2	2	2	2	2	2	2	1	1	1	1	1	1	1	1	1	1	2	2	1	2	2	1
MA-00153-219	MA-00153-219	4	4	4		1	4	4	4	0	0	0	1	1	2	1	1	1	3	1	1	2	1	3	2	3	1	1	1	3	2	4	1	0	0	0	1	1	2	1	1	1	3	1	1	2	1	3	2
MA-00153-22	MA-00153-22	6	6	6		1	6	6	6	3	4	3	3	3	2	2	4	2	2	2	2	4	6	4	4	5	3	6	6	5	6	4	5	3	4	3	3	3	2	2	4	2	2	2	2	4	6	4	4
MA-00153-223	MA-00153-223	6	6	6		1	6	6	6	6	6	6	6	6	6	6	6	5	6	6	6	6	6	6	6	6	6	6	6	6	6	6	6	6	6	6	6	6	6	6	6	5	6	6	6	6	6	6	6
MA-00153-224	MA-00153-224	20	20	20		1	20	20	20	15	16	18	17	17	18	18	16	16	15	16	16	15	16	17	15	18	18	16	17	18	14	18	17	15	16	18	17	17	18	18	16	16	15	16	16	15	16	17	15
MA-00153-225;MA-00120-152	MA-00153-225	17;4	17;4	17;4		2	17	17	17	15	16	15	16	15	15	15	15	14	14	12	14	10	15	13	14	14	14	15	14	17	17	16	15	15	16	15	16	15	15	15	15	14	14	12	14	10	15	13	14
MA-00153-228	MA-00153-228	14	14	14		1	14	14	14	4	6	5	5	5	6	5	6	5	4	6	5	11	12	13	12	10	10	9	11	9	7	7	9	4	6	5	5	5	6	5	6	5	4	6	5	11	12	13	12
MA-00153-230	MA-00153-230	5	5	5		1	5	5	5	3	5	5	5	5	2	4	4	3	3	4	5	5	5	3	4	4	4	4	5	4	4	5	5	3	5	5	5	5	2	4	4	3	3	4	5	5	5	3	4
MA-00153-231	MA-00153-231	7	7	7		1	7	7	7	4	5	5	3	4	6	4	6	5	4	4	5	3	4	3	3	4	4	5	4	6	6	5	5	4	5	5	3	4	6	4	6	5	4	4	5	3	4	3	3
MA-00153-232	MA-00153-232	2	2	2		1	2	2	2	2	0	1	0	0	2	2	1	1	2	2	2	0	1	1	0	2	0	2	0	2	2	0	2	2	0	1	0	0	2	2	1	1	2	2	2	0	1	1	0
MA-00153-234	MA-00153-234	3	3	3		1	3	3	3	1	0	1	2	2	0	2	2	0	1	1	0	2	1	1	1	0	1	2	1	1	2	1	1	1	0	1	2	2	0	2	2	0	1	1	0	2	1	1	1
MA-00153-240	MA-00153-240	1	1	1		1	1	1	1	1	0	0	0	0	0	1	0	1	1	0	0	1	0	0	0	0	0	0	0	0	0	0	0	1	0	0	0	0	0	1	0	1	1	0	0	1	0	0	0
MA-00153-241	MA-00153-241	11	11	11		1	11	11	11	3	2	4	3	3	3	2	0	1	3	5	2	8	7	9	7	7	9	7	9	4	3	1	3	3	2	4	3	3	3	2	0	1	3	5	2	8	7	9	7
MA-00153-244	MA-00153-244	4	4	4		1	4	4	4	2	2	2	1	1	2	2	2	1	2	2	1	1	2	1	2	1	1	1	1	2	2	2	2	2	2	2	1	1	2	2	2	1	2	2	1	1	2	1	2
MA-00153-245	MA-00153-245	1	1	1		1	1	1	1	1	1	1	1	1	1	0	1	1	1	1	0	0	0	0	0	0	0	0	0	1	1	0	1	1	1	1	1	1	1	0	1	1	1	1	0	0	0	0	0
MA-00153-253	MA-00153-253	13	13	13		1	13	13	13	3	3	2	4	3	3	1	4	2	3	1	3	10	11	11	11	11	9	9	7	6	4	6	5	3	3	2	4	3	3	1	4	2	3	1	3	10	11	11	11
MA-00153-254	MA-00153-254	2	2	2		1	2	2	2	2	2	1	2	2	2	2	2	1	1	1	1	1	2	1	1	2	1	2	2	2	2	2	2	2	2	1	2	2	2	2	2	1	1	1	1	1	2	1	1
MA-00153-262	MA-00153-262	2	2	2		1	2	2	2	0	0	1	0	1	1	1	1	1	2	0	1	0	0	0	0	0	0	0	0	0	1	0	0	0	0	1	0	1	1	1	1	1	2	0	1	0	0	0	0
MA-00153-263	MA-00153-263	18	18	18		1	18	18	18	8	11	12	11	10	10	8	12	9	8	4	7	7	9	11	8	9	12	7	14	11	9	11	12	8	11	12	11	10	10	8	12	9	8	4	7	7	9	11	8
MA-00153-264	MA-00153-264	15	15	4		1	15	15	4	7	9	9	7	10	6	9	8	7	7	6	7	12	8	10	9	11	10	8	8	6	9	6	6	7	9	9	7	10	6	9	8	7	7	6	7	12	8	10	9
MA-00153-265	MA-00153-265	12	12	12		1	12	12	12	12	11	9	11	11	11	11	9	9	9	7	8	9	10	8	8	9	8	11	11	9	9	10	11	12	11	9	11	11	11	11	9	9	9	7	8	9	10	8	8
MA-00153-268	MA-00153-268	2	2	2		1	2	2	2	1	1	0	1	1	0	1	1	1	0	0	0	0	1	1	0	1	2	1	2	0	1	0	0	1	1	0	1	1	0	1	1	1	0	0	0	0	1	1	0
MA-00153-269	MA-00153-269	23	23	23		1	23	23	23	16	16	17	17	15	14	17	17	16	16	19	16	18	16	18	17	19	17	18	20	18	18	17	17	16	16	17	17	15	14	17	17	16	16	19	16	18	16	18	17
MA-00153-270	MA-00153-270	34	34	25		1	34	34	25	31	30	28	29	30	31	32	30	31	29	29	30	22	22	23	21	25	25	25	26	31	30	30	32	31	30	28	29	30	31	32	30	31	29	29	30	22	22	23	21
MA-00153-271	MA-00153-271	14	14	14		1	14	14	14	11	12	13	12	12	12	12	12	11	11	12	11	12	13	13	11	12	12	12	13	12	12	12	12	11	12	13	12	12	12	12	12	11	11	12	11	12	13	13	11
MA-00153-275	MA-00153-275	2	2	2		1	2	2	2	0	0	1	0	2	1	0	0	1	1	1	1	1	1	1	1	0	0	1	0	1	1	0	1	0	0	1	0	2	1	0	0	1	1	1	1	1	1	1	1
MA-00153-277	MA-00153-277	20	20	20		1	20	20	20	12	13	11	15	14	15	13	13	12	13	13	10	15	15	15	15	13	14	14	16	14	15	15	15	12	13	11	15	14	15	13	13	12	13	13	10	15	15	15	15
MA-00153-28	MA-00153-28	1	1	1		1	1	1	1	1	1	0	0	0	0	0	0	0	0	0	0	0	0	0	0	0	0	0	0	1	0	0	0	1	1	0	0	0	0	0	0	0	0	0	0	0	0	0	0
MA-00153-280	MA-00153-280	20	20	14		1	20	20	14	11	14	11	12	11	12	8	7	7	8	5	8	6	9	7	6	9	11	9	9	13	13	12	16	11	14	11	12	11	12	8	7	7	8	5	8	6	9	7	6
MA-00153-283	MA-00153-283	10	10	10		1	10	10	10	4	5	4	7	7	4	5	6	4	3	3	5	7	8	6	7	6	7	6	6	7	6	8	5	4	5	4	7	7	4	5	6	4	3	3	5	7	8	6	7
MA-00153-284	MA-00153-284	4	4	4		1	4	4	4	0	3	2	0	0	1	1	1	2	3	2	0	1	1	2	0	1	0	1	0	2	0	2	0	0	3	2	0	0	1	1	1	2	3	2	0	1	1	2	0
MA-00153-285	MA-00153-285	8	8	8		1	8	8	8	1	3	1	3	1	3	2	1	2	2	1	1	2	2	2	1	3	2	1	1	3	1	1	1	1	3	1	3	1	3	2	1	2	2	1	1	2	2	2	1
MA-00153-29	MA-00153-29	8	8	8		1	8	8	8	4	3	4	2	5	3	3	4	4	0	3	4	3	3	4	4	3	3	4	3	4	4	3	4	4	3	4	2	5	3	3	4	4	0	3	4	3	3	4	4
MA-00153-291	MA-00153-291	7	7	7		1	7	7	7	1	1	0	3	2	2	0	1	2	1	2	3	3	5	5	5	1	2	3	5	1	0	2	2	1	1	0	3	2	2	0	1	2	1	2	3	3	5	5	5
MA-00153-292	MA-00153-292	12	6	6		1	12	6	6	8	10	9	11	10	10	9	10	9	9	10	9	8	10	7	7	12	11	9	10	8	9	9	10	4	5	5	6	5	5	5	5	5	5	6	4	3	5	3	4
MA-00153-298	MA-00153-298	4	4	4		1	4	4	4	1	1	2	1	1	1	2	2	1	1	1	0	3	2	2	2	2	3	2	1	2	2	2	2	1	1	2	1	1	1	2	2	1	1	1	0	3	2	2	2
MA-00153-302	MA-00153-302	4	3	3		1	4	3	3	2	3	4	3	3	3	1	3	2	1	1	3	3	4	3	2	4	4	3	3	4	2	2	4	2	2	3	3	3	3	1	2	2	1	1	3	2	3	2	1
MA-00153-303	MA-00153-303	4	3	3		1	4	3	3	4	4	3	3	3	4	4	2	2	2	2	2	2	4	4	3	3	3	2	1	4	3	4	3	3	3	2	3	2	3	3	1	1	1	1	1	1	3	3	2
MA-00153-304	MA-00153-304	6	6	5		1	6	6	5	4	5	4	5	4	6	5	4	2	4	3	3	3	4	4	5	4	5	4	5	4	5	4	5	4	5	4	5	4	6	5	4	2	4	3	3	3	4	4	5
MA-00153-309	MA-00153-309	12	12	12		1	12	12	12	11	10	9	11	10	10	11	10	10	9	9	11	7	9	7	8	7	9	10	10	9	9	10	9	11	10	9	11	10	10	11	10	10	9	9	11	7	9	7	8
MA-00153-311	MA-00153-311	28	15	15		1	28	15	15	21	18	20	21	25	20	21	22	16	19	21	19	18	20	22	16	21	17	14	20	20	20	23	19	11	10	11	11	15	12	12	13	8	11	12	11	8	8	9	5
MA-00153-313	MA-00153-313	16	16	16		1	16	16	16	15	13	14	15	15	15	14	14	15	11	14	14	14	16	16	14	14	16	14	14	14	14	14	15	15	13	14	15	15	15	14	14	15	11	14	14	14	16	16	14
MA-00153-320	MA-00153-320	1	1	1		1	1	1	1	0	0	0	0	0	0	0	0	0	0	0	0	0	0	1	0	1	1	0	0	0	1	1	1	0	0	0	0	0	0	0	0	0	0	0	0	0	0	1	0
MA-00153-321	MA-00153-321	18	18	18		1	18	18	18	17	15	17	16	17	18	16	15	16	14	17	16	13	16	16	13	15	16	17	15	15	17	17	14	17	15	17	16	17	18	16	15	16	14	17	16	13	16	16	13
MA-00153-323	MA-00153-323	10	10	10		1	10	10	10	0	0	0	0	2	0	0	0	9	9	9	10	0	0	1	0	0	0	0	0	0	0	0	0	0	0	0	0	2	0	0	0	9	9	9	10	0	0	1	0
MA-00153-324	MA-00153-324	3	3	3		1	3	3	3	3	3	2	3	3	2	2	2	2	2	2	2	1	1	1	1	1	1	2	1	3	2	2	2	3	3	2	3	3	2	2	2	2	2	2	2	1	1	1	1
MA-00153-325;MA-00101-190	MA-00153-325	5;2	5;2	5;2		2	5	5	5	3	4	3	3	3	3	5	3	3	2	3	3	3	2	3	2	3	3	2	3	3	2	3	3	3	4	3	3	3	3	5	3	3	2	3	3	3	2	3	2
MA-00153-326	MA-00153-326	16	16	16		1	16	16	16	7	8	7	8	8	7	8	9	3	3	1	5	13	13	13	12	10	9	10	12	8	8	8	10	7	8	7	8	8	7	8	9	3	3	1	5	13	13	13	12
MA-00153-328	MA-00153-328	19	10	10		1	19	10	10	18	19	18	18	18	19	17	18	17	16	16	17	16	19	17	14	19	19	18	18	19	19	18	18	10	10	10	10	10	10	10	10	9	8	9	10	8	10	9	6
MA-00153-333	MA-00153-333	22	22	22		1	22	22	22	10	10	11	12	13	12	11	13	12	8	9	11	18	20	19	15	17	16	17	18	14	14	14	16	10	10	11	12	13	12	11	13	12	8	9	11	18	20	19	15
MA-00153-334	MA-00153-334	5	5	5		1	5	5	5	3	3	2	5	4	4	3	3	5	2	5	4	3	4	4	2	5	3	4	4	4	3	4	4	3	3	2	5	4	4	3	3	5	2	5	4	3	4	4	2
MA-00153-337	MA-00153-337	6	6	6		1	6	6	6	5	5	6	5	6	4	5	4	1	2	2	3	4	4	6	4	4	5	5	5	5	5	5	4	5	5	6	5	6	4	5	4	1	2	2	3	4	4	6	4
MA-00153-34	MA-00153-34	10	10	10		1	10	10	10	1	2	1	1	2	2	2	2	1	2	3	2	5	7	7	7	4	4	4	6	3	3	2	2	1	2	1	1	2	2	2	2	1	2	3	2	5	7	7	7
MA-00153-344	MA-00153-344	3	3	3		1	3	3	3	2	3	3	2	3	3	2	3	2	2	2	3	2	3	3	3	3	3	3	2	3	3	3	3	2	3	3	2	3	3	2	3	2	2	2	3	2	3	3	3
MA-00153-345	MA-00153-345	2	2	2		1	2	2	2	0	0	1	1	0	0	1	2	0	1	0	1	1	0	0	0	0	0	0	0	0	0	0	0	0	0	1	1	0	0	1	2	0	1	0	1	1	0	0	0
MA-00153-35	MA-00153-35	3	3	3		1	3	3	3	3	1	3	3	3	3	3	3	3	3	3	2	3	2	1	2	2	3	3	3	3	3	3	3	3	1	3	3	3	3	3	3	3	3	3	2	3	2	1	2
MA-00153-351	MA-00153-351	26	26	26		1	26	26	26	23	24	18	22	21	20	20	20	19	18	20	22	22	23	24	23	24	21	21	23	20	20	22	21	23	24	18	22	21	20	20	20	19	18	20	22	22	23	24	23
MA-00153-353	MA-00153-353	13	13	13		1	13	13	13	11	12	11	11	12	10	12	12	12	11	12	12	9	11	10	10	9	11	10	10	11	11	11	10	11	12	11	11	12	10	12	12	12	11	12	12	9	11	10	10
MA-00153-356	MA-00153-356	24	24	24		1	24	24	24	21	20	19	21	21	23	22	20	18	20	19	19	22	23	20	20	21	22	22	22	22	21	21	23	21	20	19	21	21	23	22	20	18	20	19	19	22	23	20	20
MA-00153-357	MA-00153-357	10	10	10		1	10	10	10	8	9	9	8	8	8	6	7	7	7	7	7	7	8	8	8	7	8	9	8	8	7	9	7	8	9	9	8	8	8	6	7	7	7	7	7	7	8	8	8
MA-00153-36	MA-00153-36	7	7	7		1	7	7	7	2	2	2	2	3	2	2	1	1	3	1	2	3	0	2	1	1	2	1	0	3	2	1	2	2	2	2	2	3	2	2	1	1	3	1	2	3	0	2	1
MA-00153-373	MA-00153-373	3	2	2		1	3	2	2	2	2	2	2	2	2	1	1	2	1	1	1	2	1	1	2	1	2	1	1	2	2	2	2	1	1	1	1	1	1	1	1	1	1	1	1	1	0	0	1
MA-00153-374	MA-00153-374	10	10	10		1	10	10	10	6	6	5	5	7	5	4	6	7	5	7	5	9	9	9	8	7	6	5	7	6	5	6	3	6	6	5	5	7	5	4	6	7	5	7	5	9	9	9	8
MA-00153-376	MA-00153-376	1	1	1		1	1	1	1	0	0	0	0	0	1	0	1	1	0	1	1	0	0	0	1	1	1	1	1	0	1	1	0	0	0	0	0	0	1	0	1	1	0	1	1	0	0	0	1
MA-00153-379	MA-00153-379	4	4	4		1	4	4	4	1	2	1	1	2	1	3	3	0	0	1	1	0	2	2	1	0	1	1	2	1	2	3	2	1	2	1	1	2	1	3	3	0	0	1	1	0	2	2	1
MA-00153-380	MA-00153-380	11	11	11		1	11	11	11	5	7	4	6	8	4	6	5	5	2	6	4	6	5	8	6	8	8	9	10	5	5	8	6	5	7	4	6	8	4	6	5	5	2	6	4	6	5	8	6
MA-00153-388	MA-00153-388	5	5	5		1	5	5	5	5	5	3	5	5	5	4	4	4	4	4	5	3	3	3	3	3	3	4	5	4	4	5	5	5	5	3	5	5	5	4	4	4	4	4	5	3	3	3	3
MA-00153-391	MA-00153-391	5	5	5		1	5	5	5	2	1	1	2	2	3	2	3	2	2	2	3	0	0	0	0	0	0	1	0	1	3	2	1	2	1	1	2	2	3	2	3	2	2	2	3	0	0	0	0
MA-00153-392	MA-00153-392	5	5	5		1	5	5	5	3	4	2	3	4	2	2	4	3	3	2	4	1	3	3	3	2	2	3	3	2	2	3	3	3	4	2	3	4	2	2	4	3	3	2	4	1	3	3	3
MA-00153-396	MA-00153-396	1	1	1		1	1	1	1	0	0	0	0	0	0	0	0	0	0	0	0	0	0	0	0	0	1	0	0	0	0	0	0	0	0	0	0	0	0	0	0	0	0	0	0	0	0	0	0
MA-00153-402	MA-00153-402	3	3	3		1	3	3	3	2	2	1	1	1	0	3	2	1	0	0	1	0	0	0	1	2	1	2	3	0	2	3	3	2	2	1	1	1	0	3	2	1	0	0	1	0	0	0	1
MA-00153-404	MA-00153-404	5	5	5		1	5	5	5	1	1	0	1	2	1	2	1	1	2	0	2	0	2	1	0	0	1	0	0	0	0	1	2	1	1	0	1	2	1	2	1	1	2	0	2	0	2	1	0
MA-00153-412	MA-00153-412	3	3	3		1	3	3	3	1	0	0	0	1	2	0	1	0	0	0	1	1	3	2	1	1	1	3	2	0	0	0	1	1	0	0	0	1	2	0	1	0	0	0	1	1	3	2	1
MA-00153-417	MA-00153-417	2	2	2		1	2	2	2	1	0	0	2	0	0	0	0	0	0	0	0	2	1	1	2	2	2	2	2	2	1	2	1	1	0	0	2	0	0	0	0	0	0	0	0	2	1	1	2
MA-00153-42	MA-00153-42	30	30	30		1	30	30	30	22	20	20	22	17	20	21	21	21	21	23	19	22	23	21	22	21	24	23	24	21	22	22	20	22	20	20	22	17	20	21	21	21	21	23	19	22	23	21	22
MA-00153-422	MA-00153-422	22	22	22		1	22	22	22	11	12	10	9	12	8	10	10	10	10	7	8	13	14	14	10	11	12	13	13	13	12	10	13	11	12	10	9	12	8	10	10	10	10	7	8	13	14	14	10
MA-00153-429	MA-00153-429	9	9	9		1	9	9	9	4	5	4	4	4	5	5	3	8	6	6	6	5	3	3	4	5	4	4	4	5	4	5	5	4	5	4	4	4	5	5	3	8	6	6	6	5	3	3	4
MA-00153-43	MA-00153-43	2	2	2		1	2	2	2	1	1	2	2	2	2	1	1	1	1	2	2	0	2	2	2	2	1	2	2	2	1	1	2	1	1	2	2	2	2	1	1	1	1	2	2	0	2	2	2
MA-00153-432;MA-00101-531	MA-00153-432;MA-00101-531	7;6	7;6	7;6	;	2	7	7	7	5	4	5	2	6	5	3	3	5	5	5	6	5	5	6	4	5	7	5	4	3	2	5	6	5	4	5	2	6	5	3	3	5	5	5	6	5	5	6	4
MA-00153-433	MA-00153-433	1	1	1		1	1	1	1	0	0	0	0	0	0	0	0	0	0	0	0	1	1	0	1	1	0	0	0	0	0	0	0	0	0	0	0	0	0	0	0	0	0	0	0	1	1	0	1
MA-00153-434	MA-00153-434	18	18	18		1	18	18	18	9	10	10	13	10	10	8	10	7	11	11	7	9	11	11	9	8	11	7	13	9	10	10	11	9	10	10	13	10	10	8	10	7	11	11	7	9	11	11	9
MA-00153-435	MA-00153-435	10	10	10		1	10	10	10	2	5	4	5	5	4	4	3	4	2	4	4	6	6	9	5	6	5	5	6	6	5	4	7	2	5	4	5	5	4	4	3	4	2	4	4	6	6	9	5
MA-00153-436;MA-00101-335;MA-00213-145	MA-00153-436;MA-00101-335	3;2;1	3;2;1	3;2;1	;	3	3	3	3	3	2	2	1	3	2	2	2	2	0	0	1	1	2	2	1	1	1	2	3	1	0	0	3	3	2	2	1	3	2	2	2	2	0	0	1	1	2	2	1
MA-00153-44	MA-00153-44	5	2	2		1	5	2	2	3	3	3	3	2	3	3	4	3	5	4	4	2	2	4	2	2	3	4	3	3	3	3	2	1	1	1	1	1	1	2	1	1	2	1	2	0	0	1	0
MA-00153-440	MA-00153-440	7	7	7		1	7	7	7	3	4	3	4	4	5	3	4	5	4	5	3	2	5	6	4	4	5	6	5	4	4	4	4	3	4	3	4	4	5	3	4	5	4	5	3	2	5	6	4
MA-00153-442	MA-00153-442	2	2	2		1	2	2	2	1	0	1	1	0	1	1	0	0	1	1	0	1	0	0	0	1	1	0	0	2	0	1	1	1	0	1	1	0	1	1	0	0	1	1	0	1	0	0	0
MA-00153-443;MA-00101-352	MA-00153-443;MA-00101-352	10;5	10;5	10;5	;	2	10	10	10	3	1	2	3	3	4	3	5	1	2	3	2	6	6	6	3	7	6	6	6	6	2	4	4	3	1	2	3	3	4	3	5	1	2	3	2	6	6	6	3
MA-00153-446	MA-00153-446	24	5	5		1	24	5	5	22	24	23	23	23	24	23	23	23	21	23	22	23	23	22	21	24	24	24	24	23	23	23	23	5	5	5	5	5	5	5	5	5	5	5	5	5	5	5	4
MA-00153-448	MA-00153-448	6	6	6		1	6	6	6	2	2	3	3	3	2	2	3	3	1	2	2	0	2	4	2	1	3	2	2	3	2	1	3	2	2	3	3	3	2	2	3	3	1	2	2	0	2	4	2
MA-00153-452	MA-00153-452	26	26	26		1	26	26	26	14	14	11	11	13	15	10	15	15	13	13	9	19	18	18	19	15	18	17	22	14	12	17	16	14	14	11	11	13	15	10	15	15	13	13	9	19	18	18	19
MA-00153-455	MA-00153-455	9	9	9		1	9	9	9	1	3	1	2	3	2	2	0	0	0	1	0	6	7	8	5	7	8	8	8	3	4	2	4	1	3	1	2	3	2	2	0	0	0	1	0	6	7	8	5
MA-00153-456	MA-00153-456	4	4	4		1	4	4	4	3	1	3	4	3	3	4	4	3	3	2	4	2	4	3	3	4	3	4	3	3	3	3	3	3	1	3	4	3	3	4	4	3	3	2	4	2	4	3	3
MA-00153-458	MA-00153-458	7	7	7		1	7	7	7	4	4	2	3	5	3	5	4	2	2	3	3	5	5	5	4	3	3	4	4	2	5	4	4	4	4	2	3	5	3	5	4	2	2	3	3	5	5	5	4
MA-00153-462	MA-00153-462	13	13	13		1	13	13	13	5	7	7	7	7	8	6	6	4	6	4	6	9	11	10	8	7	9	10	12	7	8	8	7	5	7	7	7	7	8	6	6	4	6	4	6	9	11	10	8
MA-00153-464	MA-00153-464	10	10	9		1	10	10	9	4	6	6	4	6	4	4	5	3	3	4	3	3	4	6	4	6	6	7	5	6	6	5	7	4	6	6	4	6	4	4	5	3	3	4	3	3	4	6	4
MA-00153-465	MA-00153-465	24	24	18		1	24	24	18	15	13	18	14	17	19	18	20	16	17	15	17	21	22	21	21	18	18	20	19	15	19	18	20	15	13	18	14	17	19	18	20	16	17	15	17	21	22	21	21
MA-00153-466	MA-00153-466	7	7	4		1	7	7	4	3	3	2	3	3	4	3	4	2	3	5	2	2	4	4	2	3	3	3	4	3	3	4	3	3	3	2	3	3	4	3	4	2	3	5	2	2	4	4	2
MA-00153-469	MA-00153-469	3	3	3		1	3	3	3	1	1	1	3	1	2	2	0	1	2	0	0	1	1	1	2	2	1	2	2	2	1	1	1	1	1	1	3	1	2	2	0	1	2	0	0	1	1	1	2
MA-00153-47	MA-00153-47	25	25	25		1	25	25	25	1	4	1	4	7	12	11	7	8	6	5	9	19	20	14	17	14	12	15	18	8	7	7	9	1	4	1	4	7	12	11	7	8	6	5	9	19	20	14	17
MA-00153-473	MA-00153-473	3	3	3		1	3	3	3	2	3	2	1	2	2	2	3	1	2	2	1	0	0	0	0	0	0	0	0	1	0	0	0	2	3	2	1	2	2	2	3	1	2	2	1	0	0	0	0
MA-00153-474	MA-00153-474	10	10	9		1	10	10	9	10	10	9	9	9	9	10	9	10	9	8	10	5	7	5	5	7	6	5	7	10	8	9	10	10	10	9	9	9	9	10	9	10	9	8	10	5	7	5	5
MA-00153-479	MA-00153-479	13	12	12		1	13	12	12	9	9	7	8	11	11	9	8	12	12	11	11	4	3	4	3	3	3	3	4	8	8	9	8	8	8	6	7	10	10	8	7	11	11	10	10	3	2	3	2
MA-00153-480	MA-00153-480	1	1	1		1	1	1	1	1	0	0	0	1	1	0	1	0	1	1	0	0	0	0	0	0	0	0	0	0	0	0	0	1	0	0	0	1	1	0	1	0	1	1	0	0	0	0	0
MA-00153-485	MA-00153-485	14	14	14		1	14	14	14	13	12	12	12	12	13	14	13	11	11	13	12	12	12	12	10	12	12	10	12	12	12	12	12	13	12	12	12	12	13	14	13	11	11	13	12	12	12	12	10
MA-00153-49	MA-00153-49	45	45	45		1	45	45	45	37	38	38	39	34	35	36	36	31	32	32	26	42	42	40	40	41	39	39	40	37	40	39	39	37	38	38	39	34	35	36	36	31	32	32	26	42	42	40	40
MA-00153-494	MA-00153-494	1	1	1		1	1	1	1	0	1	1	1	1	1	1	1	0	1	1	0	0	0	0	0	0	1	0	0	1	0	1	0	0	1	1	1	1	1	1	1	0	1	1	0	0	0	0	0
MA-00153-495	MA-00153-495	2	2	2		1	2	2	2	0	0	0	0	1	1	1	0	0	0	1	1	0	1	1	1	0	1	1	0	1	1	0	0	0	0	0	0	1	1	1	0	0	0	1	1	0	1	1	1
MA-00153-498	MA-00153-498	21	18	18		1	21	18	18	16	16	20	20	19	19	20	18	17	16	18	17	17	18	19	17	18	19	19	19	18	17	18	19	13	13	17	17	16	16	17	15	14	13	15	14	14	15	16	14
MA-00153-501	MA-00153-501	8	8	8		1	8	8	8	8	8	6	7	5	6	6	7	6	6	5	3	6	6	8	6	7	7	8	7	5	6	7	6	8	8	6	7	5	6	6	7	6	6	5	3	6	6	8	6
MA-00153-507	MA-00153-507	9	9	9		1	9	9	9	2	5	4	1	4	3	3	4	4	4	2	6	5	2	4	4	4	6	5	6	5	4	5	4	2	5	4	1	4	3	3	4	4	4	2	6	5	2	4	4
MA-00153-508	MA-00153-508	9	9	9		1	9	9	9	2	4	3	2	3	3	3	4	2	2	2	1	3	4	4	4	4	3	2	3	4	3	3	4	2	4	3	2	3	3	3	4	2	2	2	1	3	4	4	4
MA-00153-510	MA-00153-510	1	1	1		1	1	1	1	1	1	1	1	1	1	1	1	1	1	1	1	1	1	1	1	1	1	1	1	1	1	1	1	1	1	1	1	1	1	1	1	1	1	1	1	1	1	1	1
MA-00153-515	MA-00153-515	3	3	3		1	3	3	3	2	1	1	2	2	1	1	1	2	0	1	2	2	1	0	0	1	2	1	1	2	1	1	2	2	1	1	2	2	1	1	1	2	0	1	2	2	1	0	0
MA-00153-516	MA-00153-516	13	13	13		1	13	13	13	8	10	8	9	7	9	9	8	7	4	6	6	7	7	9	7	7	9	9	9	8	9	8	9	8	10	8	9	7	9	9	8	7	4	6	6	7	7	9	7
MA-00153-518	MA-00153-518	1	1	1		1	1	1	1	1	0	0	1	0	1	1	0	0	0	0	0	0	1	1	0	0	0	0	0	0	0	0	1	1	0	0	1	0	1	1	0	0	0	0	0	0	1	1	0
MA-00153-520	MA-00153-520	14	14	5		1	14	14	5	12	12	11	10	12	11	12	14	12	11	12	10	11	11	13	12	13	11	10	11	12	11	11	11	12	12	11	10	12	11	12	14	12	11	12	10	11	11	13	12
MA-00153-521	MA-00153-521	4	4	4		1	4	4	4	4	4	4	3	4	3	4	4	4	4	3	4	4	3	4	3	3	4	3	3	4	4	4	2	4	4	4	3	4	3	4	4	4	4	3	4	4	3	4	3
MA-00153-526	MA-00153-526	21	21	20		1	21	21	20	16	14	14	13	16	15	14	15	17	15	18	20	13	13	13	12	13	13	14	16	16	14	15	15	16	14	14	13	16	15	14	15	17	15	18	20	13	13	13	12
MA-00153-527	MA-00153-527	1	1	1		1	1	1	1	0	0	0	0	0	0	0	0	0	0	0	0	0	0	1	0	0	0	0	0	0	0	0	0	0	0	0	0	0	0	0	0	0	0	0	0	0	0	1	0
MA-00153-531	MA-00153-531	1	1	1		1	1	1	1	1	0	0	1	1	1	0	0	0	0	0	0	0	0	1	0	0	0	0	0	1	0	0	1	1	0	0	1	1	1	0	0	0	0	0	0	0	0	1	0
MA-00153-539	MA-00153-539	17	17	17		1	17	17	17	11	10	11	11	13	9	10	11	10	7	8	10	12	9	14	8	10	12	13	10	7	8	10	10	11	10	11	11	13	9	10	11	10	7	8	10	12	9	14	8
MA-00153-54	MA-00153-54	3	3	3		1	3	3	3	1	1	0	1	1	1	1	0	2	2	1	1	3	2	2	2	3	3	3	1	3	2	0	1	1	1	0	1	1	1	1	0	2	2	1	1	3	2	2	2
MA-00153-540	MA-00153-540	28	28	26		1	28	28	26	27	25	25	26	24	27	23	27	24	25	24	26	27	26	26	26	26	27	28	26	26	27	26	27	27	25	25	26	24	27	23	27	24	25	24	26	27	26	26	26
MA-00153-547	MA-00153-547	18	17	17		1	18	17	17	13	11	14	11	13	11	12	14	12	11	9	12	11	14	11	11	13	12	12	11	12	14	15	14	12	10	13	10	12	10	11	13	11	10	8	11	10	13	10	10
MA-00153-550	MA-00153-550	5	5	5		1	5	5	5	0	1	0	0	0	0	1	1	0	0	1	1	1	4	3	4	2	2	3	2	0	0	0	0	0	1	0	0	0	0	1	1	0	0	1	1	1	4	3	4
MA-00153-554	MA-00153-554	1	1	1		1	1	1	1	1	1	1	1	0	1	0	0	0	0	0	0	1	1	1	0	1	1	1	1	0	0	1	1	1	1	1	1	0	1	0	0	0	0	0	0	1	1	1	0
MA-00153-555	MA-00153-555	1	1	1		1	1	1	1	1	1	1	1	1	0	1	1	0	0	0	0	0	0	0	0	0	0	0	0	1	1	1	1	1	1	1	1	1	0	1	1	0	0	0	0	0	0	0	0
MA-00153-557	MA-00153-557	9	9	9		1	9	9	9	6	5	6	7	8	6	7	7	7	7	4	6	4	5	3	7	5	4	5	5	6	6	7	6	6	5	6	7	8	6	7	7	7	7	4	6	4	5	3	7
MA-00153-559	MA-00153-559	9	9	9		1	9	9	9	4	4	4	4	5	4	6	4	2	4	2	3	6	7	4	4	5	7	5	6	5	5	5	6	4	4	4	4	5	4	6	4	2	4	2	3	6	7	4	4
MA-00153-56	MA-00153-56	1	1	1		1	1	1	1	1	1	1	1	1	1	1	1	1	1	1	1	1	1	1	1	1	1	1	1	1	1	1	1	1	1	1	1	1	1	1	1	1	1	1	1	1	1	1	1
MA-00153-561	MA-00153-561	3	3	3		1	3	3	3	0	1	0	1	0	0	0	0	0	1	0	0	0	1	1	1	1	1	1	2	0	0	1	0	0	1	0	1	0	0	0	0	0	1	0	0	0	1	1	1
MA-00153-562	MA-00153-562	3	3	3		1	3	3	3	1	1	1	1	1	1	1	1	0	2	1	1	1	1	1	1	2	1	1	1	2	1	0	1	1	1	1	1	1	1	1	1	0	2	1	1	1	1	1	1
MA-00153-563	MA-00153-563	14	14	14		1	14	14	14	7	8	8	10	10	9	9	9	8	6	11	10	10	11	14	12	13	11	10	12	9	7	9	9	7	8	8	10	10	9	9	9	8	6	11	10	10	11	14	12
MA-00153-565	MA-00153-565	1	1	1		1	1	1	1	0	0	0	1	0	0	0	0	0	0	0	0	0	1	1	0	0	0	0	0	0	0	0	0	0	0	0	1	0	0	0	0	0	0	0	0	0	1	1	0
MA-00153-566	MA-00153-566	5	5	5		1	5	5	5	1	0	1	0	0	1	0	1	1	0	1	0	3	1	0	1	2	1	0	0	0	1	0	0	1	0	1	0	0	1	0	1	1	0	1	0	3	1	0	1
MA-00153-568	MA-00153-568	3	1	1		1	3	1	1	2	2	3	2	2	2	3	2	2	2	2	2	2	2	2	2	2	2	2	2	2	2	2	2	0	0	1	0	0	0	1	0	0	0	0	0	0	0	0	0
MA-00153-569	MA-00153-569	5	5	5		1	5	5	5	3	1	3	2	3	1	2	2	2	3	3	3	3	3	1	4	1	0	2	1	1	0	4	2	3	1	3	2	3	1	2	2	2	3	3	3	3	3	1	4
MA-00153-57	MA-00153-57	7	7	7		1	7	7	7	4	6	6	5	5	7	6	4	7	5	6	7	3	7	6	7	5	7	6	7	5	6	6	5	4	6	6	5	5	7	6	4	7	5	6	7	3	7	6	7
MA-00153-571	MA-00153-571	17	16	16		1	17	16	16	12	12	9	13	14	14	14	13	12	13	12	15	7	9	11	6	10	9	10	10	10	10	14	13	11	11	9	12	13	13	13	12	11	12	11	14	6	8	11	5
MA-00153-579	MA-00153-579	5	5	5		1	5	5	5	3	3	2	2	3	2	4	4	2	3	2	3	1	0	0	0	1	0	0	0	1	1	1	1	3	3	2	2	3	2	4	4	2	3	2	3	1	0	0	0
MA-00153-584	MA-00153-584	25	25	25		1	25	25	25	14	12	12	15	13	16	12	16	11	14	13	17	18	20	21	17	18	18	17	18	19	16	16	16	14	12	12	15	13	16	12	16	11	14	13	17	18	20	21	17
MA-00153-585	MA-00153-585	11	11	11		1	11	11	11	9	8	6	9	6	7	10	10	10	10	9	8	9	9	9	10	9	9	6	10	9	9	10	8	9	8	6	9	6	7	10	10	10	10	9	8	9	9	9	10
MA-00153-589	MA-00153-589	3	3	3		1	3	3	3	2	2	2	2	1	2	2	2	2	1	2	1	3	2	2	2	2	2	2	2	2	2	2	2	2	2	2	2	1	2	2	2	2	1	2	1	3	2	2	2
MA-00153-594	MA-00153-594	6	5	5		1	6	5	5	1	2	2	2	1	4	2	2	2	2	3	2	3	4	2	2	2	3	2	4	3	1	4	2	0	1	1	1	0	3	1	1	1	1	2	1	2	3	1	1
MA-00153-595	MA-00153-595	1	1	1		1	1	1	1	0	1	0	1	0	1	1	1	0	0	1	1	1	1	1	0	1	0	1	0	1	1	1	1	0	1	0	1	0	1	1	1	0	0	1	1	1	1	1	0
MA-00153-598	MA-00153-598	18	18	18		1	18	18	18	11	11	7	9	9	11	11	11	10	8	9	7	14	14	13	11	11	12	11	11	10	12	11	12	11	11	7	9	9	11	11	11	10	8	9	7	14	14	13	11
MA-00153-6	MA-00153-6	2	1	1		1	2	1	1	0	0	0	0	0	0	0	0	0	0	0	0	1	0	1	0	0	0	0	0	0	0	0	0	0	0	0	0	0	0	0	0	0	0	0	0	0	0	1	0
MA-00153-601	MA-00153-601	23	23	23		1	23	23	23	18	18	15	15	17	16	17	14	14	15	13	16	12	16	16	12	18	14	14	17	16	14	15	16	18	18	15	15	17	16	17	14	14	15	13	16	12	16	16	12
MA-00153-605	MA-00153-605	7	7	7		1	7	7	7	3	3	5	5	4	3	3	4	3	3	4	3	4	4	5	3	3	5	5	5	3	5	4	4	3	3	5	5	4	3	3	4	3	3	4	3	4	4	5	3
MA-00153-606	MA-00153-606	3	3	3		1	3	3	3	2	2	2	2	1	2	2	2	2	2	1	2	1	2	2	2	2	2	2	2	2	1	1	2	2	2	2	2	1	2	2	2	2	2	1	2	1	2	2	2
MA-00153-607	MA-00153-607	3	3	3		1	3	3	3	2	1	1	1	1	2	1	1	2	2	1	1	2	0	1	2	1	1	2	2	2	2	2	2	2	1	1	1	1	2	1	1	2	2	1	1	2	0	1	2
MA-00153-613	MA-00153-613	11	11	3		1	11	11	3	8	9	8	8	8	9	9	8	7	8	9	8	5	5	5	5	6	7	7	5	7	6	10	8	8	9	8	8	8	9	9	8	7	8	9	8	5	5	5	5
MA-00153-614	MA-00153-614	4	2	2		1	4	2	2	2	2	3	2	2	2	2	3	2	2	3	2	2	2	3	2	4	3	2	2	2	2	3	3	0	0	1	0	0	0	0	1	0	0	1	0	0	1	1	0
MA-00153-616	MA-00153-616	8	8	8		1	8	8	8	7	6	6	6	7	8	5	6	7	7	7	8	8	7	8	8	6	7	6	6	8	6	5	5	7	6	6	6	7	8	5	6	7	7	7	8	8	7	8	8
MA-00153-618	MA-00153-618	4	2	2		1	4	2	2	1	2	0	1	0	2	0	1	0	0	2	2	2	3	3	2	2	1	2	2	3	2	2	2	1	1	0	1	0	2	0	1	0	0	2	2	2	2	2	2
MA-00153-62;MA-00184-267	MA-00153-62;MA-00184-267	18;17	18;17	12;11	;	2	18	18	12	14	13	13	15	15	16	15	14	14	15	14	14	15	16	17	17	14	14	17	16	16	14	15	15	14	13	13	15	15	16	15	14	14	15	14	14	15	16	17	17
MA-00153-629	MA-00153-629	9	9	5		1	9	9	5	3	4	4	4	2	2	3	5	5	3	5	4	6	5	8	7	4	5	7	6	3	3	2	3	3	4	4	4	2	2	3	5	5	3	5	4	6	5	8	7
MA-00153-643	MA-00153-643	3	3	3		1	3	3	3	3	3	3	3	3	2	3	3	2	3	3	3	3	2	3	3	3	3	3	3	3	3	3	3	3	3	3	3	3	2	3	3	2	3	3	3	3	2	3	3
MA-00153-658	MA-00153-658	2	2	2		1	2	2	2	1	1	1	1	1	1	1	2	1	1	1	2	0	0	0	0	0	0	1	1	0	2	1	0	1	1	1	1	1	1	1	2	1	1	1	2	0	0	0	0
MA-00153-662	MA-00153-662	23	23	17		1	23	23	17	18	18	18	21	19	20	21	20	19	18	20	19	16	13	14	15	15	14	14	16	16	17	18	18	18	18	18	21	19	20	21	20	19	18	20	19	16	13	14	15
MA-00153-665	MA-00153-665	14	11	11		1	14	11	11	10	12	7	7	10	11	9	11	12	10	11	12	9	8	8	6	9	9	8	11	11	9	10	8	7	9	5	5	8	8	7	8	9	7	8	9	7	6	6	4
MA-00153-668	MA-00153-668	16	16	16		1	16	16	16	12	12	10	14	13	14	14	13	12	11	12	14	8	12	8	10	13	9	13	14	14	15	13	13	12	12	10	14	13	14	14	13	12	11	12	14	8	12	8	10
MA-00153-674	MA-00153-674	33	33	33		1	33	33	33	18	17	15	17	15	16	13	20	12	12	14	12	23	24	24	18	20	20	24	22	19	17	17	20	18	17	15	17	15	16	13	20	12	12	14	12	23	24	24	18
MA-00153-675	MA-00153-675	5	5	5		1	5	5	5	3	3	3	3	3	3	3	3	2	3	2	4	2	2	3	3	3	3	3	3	3	3	2	3	3	3	3	3	3	3	3	3	2	3	2	4	2	2	3	3
MA-00153-697	MA-00153-697	1	1	1		1	1	1	1	0	0	1	1	1	0	1	1	1	1	1	1	1	1	1	1	0	1	0	1	1	1	1	1	0	0	1	1	1	0	1	1	1	1	1	1	1	1	1	1
MA-00153-7	MA-00153-7	1	1	1		1	1	1	1	1	1	1	1	1	1	1	1	1	1	1	1	1	1	1	1	1	1	1	1	1	1	1	1	1	1	1	1	1	1	1	1	1	1	1	1	1	1	1	1
MA-00153-701	MA-00153-701	13	2	2		1	13	2	2	5	5	4	5	6	5	4	7	6	4	5	3	10	7	7	5	9	7	7	10	8	7	7	7	0	0	0	1	1	0	0	0	0	0	0	0	1	1	0	1
MA-00153-706	MA-00153-706	1	1	1		1	1	1	1	1	1	1	1	0	1	1	0	0	0	0	1	0	1	1	0	1	0	1	0	0	1	1	0	1	1	1	1	0	1	1	0	0	0	0	1	0	1	1	0
MA-00153-707	MA-00153-707	1	1	1		1	1	1	1	0	0	0	0	0	1	1	1	1	1	1	1	0	0	0	0	0	0	0	0	0	0	0	0	0	0	0	0	0	1	1	1	1	1	1	1	0	0	0	0
MA-00153-711	MA-00153-711	5	5	5		1	5	5	5	3	2	3	3	4	2	3	1	2	2	2	2	3	3	3	2	3	3	3	4	3	3	3	4	3	2	3	3	4	2	3	1	2	2	2	2	3	3	3	2
MA-00153-712	MA-00153-712	15	15	15		1	15	15	15	12	14	10	11	10	11	12	12	9	9	11	11	10	12	11	10	10	12	9	9	9	9	9	11	12	14	10	11	10	11	12	12	9	9	11	11	10	12	11	10
MA-00153-717	MA-00153-717	15	15	15		1	15	15	15	10	9	9	12	13	10	12	12	8	9	13	9	9	9	12	9	10	12	11	12	9	11	12	10	10	9	9	12	13	10	12	12	8	9	13	9	9	9	12	9
MA-00153-718	MA-00153-718	4	4	4		1	4	4	4	2	1	2	2	3	2	3	3	2	2	2	2	1	2	2	1	1	2	1	2	2	1	1	2	2	1	2	2	3	2	3	3	2	2	2	2	1	2	2	1
MA-00153-720	MA-00153-720	2	2	2		1	2	2	2	1	1	1	0	1	0	0	1	0	1	0	0	1	1	1	1	1	2	1	2	0	1	0	1	1	1	1	0	1	0	0	1	0	1	0	0	1	1	1	1
MA-00153-723	MA-00153-723	1	1	1		1	1	1	1	0	0	0	0	0	0	0	0	0	0	0	0	0	0	0	0	0	1	0	1	0	0	0	0	0	0	0	0	0	0	0	0	0	0	0	0	0	0	0	0
MA-00153-74	MA-00153-74	1	1	1		1	1	1	1	0	0	0	0	1	0	0	0	0	0	0	0	0	0	1	0	1	1	0	0	0	0	0	0	0	0	0	0	1	0	0	0	0	0	0	0	0	0	1	0
MA-00153-79	MA-00153-79	1	1	1		1	1	1	1	1	1	0	1	0	1	0	0	1	0	1	1	0	0	0	0	0	0	0	0	1	0	0	0	1	1	0	1	0	1	0	0	1	0	1	1	0	0	0	0
MA-00153-81	MA-00153-81	3	3	3		1	3	3	3	2	2	2	2	2	2	2	1	1	3	3	2	2	2	2	2	2	2	2	1	2	2	2	2	2	2	2	2	2	2	2	1	1	3	3	2	2	2	2	2
MA-00153-83	MA-00153-83	14	9	9		1	14	9	9	13	12	12	12	11	11	12	12	11	11	11	12	13	12	12	11	12	11	12	12	11	11	13	12	8	7	7	7	6	6	7	7	6	6	6	7	8	7	7	6
MA-00153-84	MA-00153-84	2	2	2		1	2	2	2	1	1	1	1	0	1	1	1	1	0	0	0	1	1	1	1	1	1	1	1	1	1	1	1	1	1	1	1	0	1	1	1	1	0	0	0	1	1	1	1
MA-00153-87	MA-00153-87	8	8	8		1	8	8	8	1	2	2	2	3	3	3	2	2	2	2	3	4	4	6	5	3	3	5	4	5	2	4	2	1	2	2	2	3	3	3	2	2	2	2	3	4	4	6	5
MA-00153-88	MA-00153-88	2	2	2		1	2	2	2	1	1	1	1	1	1	1	1	1	1	1	1	1	2	2	2	1	1	1	1	1	1	1	2	1	1	1	1	1	1	1	1	1	1	1	1	1	2	2	2
MA-00153-89	MA-00153-89	7	7	7		1	7	7	7	3	3	3	5	5	5	5	4	4	3	3	4	4	4	3	5	5	5	5	5	5	5	3	4	3	3	3	5	5	5	5	4	4	3	3	4	4	4	3	5
MA-00153-9	MA-00153-9	8	8	8		1	8	8	8	3	1	2	3	4	7	3	4	3	3	2	5	5	7	5	5	4	6	4	6	4	5	3	5	3	1	2	3	4	7	3	4	3	3	2	5	5	7	5	5
MA-00153-92	MA-00153-92	1	1	1		1	1	1	1	0	1	1	0	0	0	1	0	1	1	1	1	0	0	1	1	1	1	0	0	0	0	1	0	0	1	1	0	0	0	1	0	1	1	1	1	0	0	1	1
MA-00153-98	MA-00153-98	2	2	2		1	2	2	2	0	0	0	0	0	0	0	0	2	0	0	0	0	0	0	0	0	0	2	0	0	0	0	0	0	0	0	0	0	0	0	0	2	0	0	0	0	0	0	0
MA-00154-1	MA-00154-1	2	2	2		1	2	2	2	1	0	1	1	1	0	0	0	0	1	1	0	0	1	1	2	1	0	0	1	2	1	0	2	1	0	1	1	1	0	0	0	0	1	1	0	0	1	1	2
MA-00154-2	MA-00154-2	1	1	1		1	1	1	1	1	1	1	1	1	0	0	1	1	0	1	1	1	1	1	1	1	1	1	1	1	1	1	1	1	1	1	1	1	0	0	1	1	0	1	1	1	1	1	1
MA-00154-3	MA-00154-3	1	1	1		1	1	1	1	1	1	1	1	1	1	1	1	1	1	1	1	1	1	1	1	1	1	1	1	1	1	1	1	1	1	1	1	1	1	1	1	1	1	1	1	1	1	1	1
MA-00156-2	MA-00156-2	1	1	1		1	1	1	1	0	0	0	0	0	0	0	0	0	0	0	0	0	1	0	1	1	0	1	1	0	0	0	0	0	0	0	0	0	0	0	0	0	0	0	0	0	1	0	1
MA-00160-1	MA-00160-1	7	7	7		1	7	7	7	3	4	3	3	2	1	2	3	3	3	1	1	5	3	3	3	4	2	1	3	2	3	2	3	3	4	3	3	2	1	2	3	3	3	1	1	5	3	3	3
MA-00162-102	MA-00162-102	3	3	3		1	3	3	3	1	2	2	1	2	2	2	1	2	2	1	2	1	1	2	1	2	2	2	1	2	2	2	1	1	2	2	1	2	2	2	1	2	2	1	2	1	1	2	1
MA-00162-104	MA-00162-104	7	7	7		1	7	7	7	3	4	3	3	3	2	4	3	1	3	5	2	2	3	3	2	2	3	2	1	4	1	2	1	3	4	3	3	3	2	4	3	1	3	5	2	2	3	3	2
MA-00162-108	MA-00162-108	39	39	39		1	39	39	39	15	20	15	19	20	19	21	16	20	16	21	23	16	19	18	15	17	17	13	16	16	14	19	19	15	20	15	19	20	19	21	16	20	16	21	23	16	19	18	15
MA-00162-11	MA-00162-11	5	5	5		1	5	5	5	5	4	2	3	4	3	4	2	1	3	3	2	2	3	1	1	3	3	3	1	3	2	4	3	5	4	2	3	4	3	4	2	1	3	3	2	2	3	1	1
MA-00162-110	MA-00162-110	51	51	51		1	51	51	51	33	37	33	32	37	32	33	37	36	32	33	29	10	12	12	11	18	17	18	20	31	33	33	35	33	37	33	32	37	32	33	37	36	32	33	29	10	12	12	11
MA-00162-112	MA-00162-112	10	10	10		1	10	10	10	7	7	7	6	6	5	7	7	6	5	5	5	8	10	9	7	8	8	9	10	9	7	7	8	7	7	7	6	6	5	7	7	6	5	5	5	8	10	9	7
MA-00162-12	MA-00162-12	16	16	16		1	16	16	16	11	14	12	15	12	13	12	12	12	11	13	13	7	10	9	10	11	11	13	9	14	15	15	13	11	14	12	15	12	13	12	12	12	11	13	13	7	10	9	10
MA-00162-131	MA-00162-131	14	14	14		1	14	14	14	12	12	12	13	13	12	12	12	12	12	12	12	5	8	7	4	7	7	9	11	10	9	12	11	12	12	12	13	13	12	12	12	12	12	12	12	5	8	7	4
MA-00162-134	MA-00162-134	7	7	7		1	7	7	7	5	2	2	3	4	3	4	3	4	1	3	4	3	4	3	2	2	3	2	4	2	3	4	3	5	2	2	3	4	3	4	3	4	1	3	4	3	4	3	2
MA-00162-137	MA-00162-137	2	2	2		1	2	2	2	1	0	1	1	1	1	0	2	0	0	0	0	1	0	0	0	0	0	1	0	1	1	0	1	1	0	1	1	1	1	0	2	0	0	0	0	1	0	0	0
MA-00162-14	MA-00162-14	5	2	2		1	5	2	2	1	1	1	1	2	1	0	1	0	0	1	0	3	5	3	3	3	3	4	4	2	3	1	2	0	0	0	0	0	0	0	0	0	0	0	0	1	2	1	1
MA-00162-144	MA-00162-144	1	1	1		1	1	1	1	1	1	1	1	1	1	1	1	0	1	0	0	1	1	1	1	1	1	1	1	1	1	1	1	1	1	1	1	1	1	1	1	0	1	0	0	1	1	1	1
MA-00162-145	MA-00162-145	2	2	2		1	2	2	2	1	1	1	1	1	1	1	1	1	1	1	1	2	1	1	2	2	2	2	1	1	1	2	2	1	1	1	1	1	1	1	1	1	1	1	1	2	1	1	2
MA-00162-146;MA-00189-377	MA-00162-146;MA-00189-377	2;2	2;2	2;2	;	2	2	2	2	2	2	2	1	2	2	1	1	1	2	1	2	2	2	2	2	2	2	2	2	2	2	2	1	2	2	2	1	2	2	1	1	1	2	1	2	2	2	2	2
MA-00162-147	MA-00162-147	17	15	15		1	17	15	15	13	11	8	13	12	15	10	12	13	12	12	12	8	5	3	4	4	5	4	5	7	8	9	7	11	9	6	11	10	13	8	11	11	10	11	10	6	3	1	2
MA-00162-150	MA-00162-150	9	9	9		1	9	9	9	0	1	5	3	3	1	3	3	2	2	2	1	3	0	2	3	3	2	4	2	5	2	5	6	0	1	5	3	3	1	3	3	2	2	2	1	3	0	2	3
MA-00162-151	MA-00162-151	3	3	3		1	3	3	3	1	1	0	0	0	1	0	0	0	0	1	0	2	1	1	1	1	0	1	1	0	0	0	0	1	1	0	0	0	1	0	0	0	0	1	0	2	1	1	1
MA-00162-153	MA-00162-153	10	10	9		1	10	10	9	9	7	5	6	7	7	7	6	3	3	3	5	2	3	4	3	2	4	5	6	6	4	5	6	9	7	5	6	7	7	7	6	3	3	3	5	2	3	4	3
MA-00162-156	MA-00162-156	3	3	3		1	3	3	3	1	3	0	1	2	1	1	0	2	2	1	1	1	1	2	1	1	1	1	1	0	2	1	0	1	3	0	1	2	1	1	0	2	2	1	1	1	1	2	1
MA-00162-158;MA-00055-236	MA-00162-158;MA-00055-236	9;8	9;8	9;8	;	2	9	9	9	7	7	7	7	7	7	7	6	7	6	5	6	7	8	8	6	7	7	7	8	7	5	7	7	7	7	7	7	7	7	7	6	7	6	5	6	7	8	8	6
MA-00162-163	MA-00162-163	6	6	6		1	6	6	6	4	3	2	4	3	4	4	4	4	4	4	3	4	5	4	4	5	4	5	4	3	4	3	3	4	3	2	4	3	4	4	4	4	4	4	3	4	5	4	4
MA-00162-165	MA-00162-165	9	9	9		1	9	9	9	7	7	7	6	4	7	6	7	6	6	7	6	4	2	2	2	2	3	2	3	3	6	5	5	7	7	7	6	4	7	6	7	6	6	7	6	4	2	2	2
MA-00162-17	MA-00162-17	7	7	4		1	7	7	4	3	2	3	3	5	4	1	2	2	1	2	1	4	5	4	3	5	3	5	4	4	3	2	5	3	2	3	3	5	4	1	2	2	1	2	1	4	5	4	3
MA-00162-172	MA-00162-172	3	3	3		1	3	3	3	1	1	1	1	1	1	1	1	0	0	0	2	0	3	3	1	1	3	2	3	1	0	1	1	1	1	1	1	1	1	1	1	0	0	0	2	0	3	3	1
MA-00162-173	MA-00162-173	3	3	3		1	3	3	3	2	1	1	0	1	0	0	1	1	1	1	1	1	1	1	1	1	1	0	1	2	0	1	1	2	1	1	0	1	0	0	1	1	1	1	1	1	1	1	1
MA-00162-185	MA-00162-185	2	2	2		1	2	2	2	0	0	0	0	0	0	0	0	0	0	0	0	0	0	0	0	0	0	0	1	0	1	0	0	0	0	0	0	0	0	0	0	0	0	0	0	0	0	0	0
MA-00162-192	MA-00162-192	5	5	2		1	5	5	2	2	2	2	2	2	2	4	2	3	2	2	2	2	1	2	2	2	2	2	3	1	2	2	2	2	2	2	2	2	2	4	2	3	2	2	2	2	1	2	2
MA-00162-194	MA-00162-194	3	3	3		1	3	3	3	2	2	2	2	2	2	2	2	2	1	1	2	2	2	2	2	2	2	3	2	3	3	3	2	2	2	2	2	2	2	2	2	2	1	1	2	2	2	2	2
MA-00162-199	MA-00162-199	2	2	2		1	2	2	2	2	1	1	2	1	1	0	1	0	0	0	0	1	1	0	1	1	1	1	1	2	1	1	2	2	1	1	2	1	1	0	1	0	0	0	0	1	1	0	1
MA-00162-207	MA-00162-207	66	66	37		1	66	66	37	42	43	38	41	45	41	42	43	42	37	40	42	53	55	57	46	48	49	50	55	43	44	45	49	42	43	38	41	45	41	42	43	42	37	40	42	53	55	57	46
MA-00162-208	MA-00162-208	1	1	1		1	1	1	1	0	0	0	0	0	0	0	0	0	0	0	0	1	1	0	0	0	0	0	0	0	0	0	0	0	0	0	0	0	0	0	0	0	0	0	0	1	1	0	0
MA-00162-210	MA-00162-210	2	2	2		1	2	2	2	1	1	0	1	1	1	1	1	1	1	1	1	1	1	1	1	2	2	1	1	0	1	2	1	1	1	0	1	1	1	1	1	1	1	1	1	1	1	1	1
MA-00162-217	MA-00162-217	5	5	5		1	5	5	5	2	1	2	3	0	1	1	0	1	0	0	1	1	3	3	1	2	2	2	0	1	4	3	2	2	1	2	3	0	1	1	0	1	0	0	1	1	3	3	1
MA-00162-221	MA-00162-221	2	1	1		1	2	1	1	2	0	1	1	1	0	0	1	2	1	0	2	1	1	1	1	1	2	1	2	1	0	0	0	1	0	1	1	0	0	0	1	1	0	0	1	0	0	0	0
MA-00162-223;MA-00189-238	MA-00162-223;MA-00189-238	2;2	2;2	2;2	;	2	2	2	2	2	1	2	2	1	2	1	1	1	1	1	0	1	2	1	2	0	2	1	2	1	2	2	1	2	1	2	2	1	2	1	1	1	1	1	0	1	2	1	2
MA-00162-227	MA-00162-227	4	4	4		1	4	4	4	2	2	1	3	3	2	2	1	1	1	2	2	2	2	2	2	2	3	3	2	2	3	3	2	2	2	1	3	3	2	2	1	1	1	2	2	2	2	2	2
MA-00162-232	MA-00162-232	2	2	2		1	2	2	2	1	1	1	1	1	2	2	1	1	1	1	2	1	1	1	1	0	1	1	0	1	0	1	1	1	1	1	1	1	2	2	1	1	1	1	2	1	1	1	1
MA-00162-233	MA-00162-233	27	27	27		1	27	27	27	20	23	18	20	23	18	20	20	19	18	15	18	20	21	21	20	23	21	21	25	21	21	21	22	20	23	18	20	23	18	20	20	19	18	15	18	20	21	21	20
MA-00162-24	MA-00162-24	1	1	1		1	1	1	1	1	1	1	1	1	1	1	1	1	0	1	1	0	1	1	0	1	0	1	1	1	1	1	1	1	1	1	1	1	1	1	1	1	0	1	1	0	1	1	0
MA-00162-242	MA-00162-242	3	3	3		1	3	3	3	0	3	1	0	1	2	1	1	1	0	0	0	2	2	1	2	1	1	1	1	0	0	3	1	0	3	1	0	1	2	1	1	1	0	0	0	2	2	1	2
MA-00162-243	MA-00162-243	3	3	3		1	3	3	3	3	3	3	3	3	0	3	3	3	3	2	3	2	2	2	2	2	2	2	2	3	3	3	3	3	3	3	3	3	0	3	3	3	3	2	3	2	2	2	2
MA-00162-249	MA-00162-249	11	2	2		1	11	2	2	5	6	6	6	9	8	10	7	10	10	8	10	7	9	9	8	8	7	7	6	5	6	8	6	0	1	0	1	1	1	2	1	2	2	1	1	1	1	1	1
MA-00162-25	MA-00162-25	5	5	5		1	5	5	5	4	4	3	3	3	4	4	4	4	3	4	4	3	2	2	3	5	5	5	5	5	5	4	4	4	4	3	3	3	4	4	4	4	3	4	4	3	2	2	3
MA-00162-250	MA-00162-250	1	1	1		1	1	1	1	1	1	1	1	1	1	1	1	0	1	1	1	0	1	0	1	1	1	0	1	0	0	1	1	1	1	1	1	1	1	1	1	0	1	1	1	0	1	0	1
MA-00162-252	MA-00162-252	3	3	3		1	3	3	3	2	0	1	1	2	2	1	0	0	0	0	0	1	2	2	1	2	2	2	1	1	1	1	0	2	0	1	1	2	2	1	0	0	0	0	0	1	2	2	1
MA-00162-253	MA-00162-253	1	1	1		1	1	1	1	1	1	0	1	1	1	1	1	1	0	0	0	1	1	1	1	1	1	1	1	1	1	1	1	1	1	0	1	1	1	1	1	1	0	0	0	1	1	1	1
MA-00162-257	MA-00162-257	15	14	14		1	15	14	14	14	10	12	12	11	12	12	12	12	10	10	10	12	10	11	10	13	12	13	11	12	13	13	14	13	9	11	11	10	11	11	11	11	9	9	9	11	9	10	9
MA-00162-259	MA-00162-259	15	15	15		1	15	15	15	14	14	13	13	14	14	13	14	13	13	14	13	10	11	11	11	13	12	11	14	14	14	15	13	14	14	13	13	14	14	13	14	13	13	14	13	10	11	11	11
MA-00162-260	MA-00162-260	1	1	1		1	1	1	1	1	1	1	1	1	1	1	1	0	1	1	0	0	0	1	1	1	1	1	1	1	1	1	1	1	1	1	1	1	1	1	1	0	1	1	0	0	0	1	1
MA-00162-262	MA-00162-262	36	36	16		1	36	36	16	24	25	24	27	26	25	24	26	23	24	22	23	29	32	31	28	25	29	30	27	25	24	28	28	24	25	24	27	26	25	24	26	23	24	22	23	29	32	31	28
MA-00162-264	MA-00162-264	3	3	3		1	3	3	3	1	1	0	1	2	0	1	0	1	1	1	0	1	1	1	3	0	1	1	1	1	0	1	1	1	1	0	1	2	0	1	0	1	1	1	0	1	1	1	3
MA-00162-273	MA-00162-273	14	14	14		1	14	14	14	8	6	6	9	10	5	8	9	6	5	5	6	6	10	9	6	9	10	11	9	11	9	8	10	8	6	6	9	10	5	8	9	6	5	5	6	6	10	9	6
MA-00162-280;MA-00189-325	MA-00162-280;MA-00189-325	16;15	15;14	15;14	;	2	16	15	15	11	13	9	13	13	12	12	12	11	10	12	12	13	15	14	12	13	13	11	11	13	12	11	11	10	12	8	12	12	11	11	11	10	9	11	11	12	14	13	11
MA-00189-320;MA-00162-281	MA-00189-320;MA-00162-281	10;10	10;10	10;10	;	2	10	10	10	8	9	10	9	8	10	9	9	8	9	8	9	7	9	9	8	9	9	10	10	8	9	9	9	8	9	10	9	8	10	9	9	8	9	8	9	7	9	9	8
MA-00162-283	MA-00162-283	33	26	26		1	33	26	26	21	20	23	24	25	21	23	21	24	24	25	25	24	25	24	23	23	20	23	21	24	18	23	23	15	14	16	18	19	14	16	14	18	18	19	18	17	18	18	18
MA-00162-286;MA-00189-318	MA-00162-286;MA-00189-318	13;11	13;11	13;11	;	2	13	13	13	11	11	11	11	11	13	11	13	11	11	9	11	11	11	11	11	10	13	10	11	9	13	9	10	11	11	11	11	11	13	11	13	11	11	9	11	11	11	11	11
MA-00162-287	MA-00162-287	2	2	1		1	2	2	1	1	1	1	1	2	2	2	2	0	2	1	1	1	2	1	2	1	2	1	2	1	1	1	1	1	1	1	1	2	2	2	2	0	2	1	1	1	2	1	2
MA-00162-291	MA-00162-291	3	3	3		1	3	3	3	0	1	0	0	0	1	1	2	1	0	0	0	0	0	1	0	1	0	0	0	0	0	0	0	0	1	0	0	0	1	1	2	1	0	0	0	0	0	1	0
MA-00162-295	MA-00162-295	2	2	2		1	2	2	2	0	0	0	0	0	1	0	0	0	0	0	1	1	1	2	0	0	0	0	1	0	0	0	0	0	0	0	0	0	1	0	0	0	0	0	1	1	1	2	0
MA-00162-296;MA-00189-303	MA-00162-296;MA-00189-303	2;1	2;1	2;1	;	2	2	2	2	1	2	2	2	1	2	2	2	2	2	2	2	2	2	2	1	2	2	2	2	1	2	1	2	1	2	2	2	1	2	2	2	2	2	2	2	2	2	2	1
MA-00162-297	MA-00162-297	1	1	1		1	1	1	1	1	0	1	1	0	0	1	0	0	1	1	1	0	1	1	0	1	0	1	1	1	1	1	1	1	0	1	1	0	0	1	0	0	1	1	1	0	1	1	0
MA-00162-300	MA-00162-300	9	9	9		1	9	9	9	3	5	6	5	5	6	6	7	5	4	5	5	5	6	5	7	8	5	6	6	6	7	5	6	3	5	6	5	5	6	6	7	5	4	5	5	5	6	5	7
MA-00162-301	MA-00162-301	7	7	7		1	7	7	7	6	7	7	7	7	7	7	7	7	7	7	7	7	7	7	7	7	7	7	7	7	7	7	7	6	7	7	7	7	7	7	7	7	7	7	7	7	7	7	7
MA-00162-308	MA-00162-308	28	28	28		1	28	28	28	23	21	22	21	22	21	24	21	19	21	21	19	23	26	25	26	23	23	24	25	22	23	25	25	23	21	22	21	22	21	24	21	19	21	21	19	23	26	25	26
MA-00326-40;MA-00162-309	MA-00326-40;MA-00162-309	3;3	3;3	3;3	;	2	3	3	3	3	2	2	3	3	3	3	3	3	3	2	3	2	3	3	3	3	3	3	3	2	3	2	3	3	2	2	3	3	3	3	3	3	3	2	3	2	3	3	3
MA-00162-314	MA-00162-314	11	11	3		1	11	11	3	11	10	9	9	10	9	10	10	8	9	8	9	9	10	8	9	9	8	10	9	7	8	10	9	11	10	9	9	10	9	10	10	8	9	8	9	9	10	8	9
MA-00162-315	MA-00162-315	4	4	4		1	4	4	4	1	1	1	1	1	2	3	0	1	0	1	1	1	1	1	1	1	1	1	1	1	2	3	2	1	1	1	1	1	2	3	0	1	0	1	1	1	1	1	1
MA-00162-318	MA-00162-318	15	1	1		1	15	1	1	12	11	12	9	11	11	11	12	11	12	13	11	11	12	13	12	14	14	11	11	13	12	13	11	1	1	1	1	1	1	1	0	1	1	1	1	1	1	1	1
MA-00162-320	MA-00162-320	12	5	5		1	12	5	5	7	5	6	6	8	7	6	7	7	6	6	7	5	7	6	6	5	7	7	7	5	4	6	5	1	1	1	2	2	3	1	2	2	1	2	2	0	1	1	0
MA-00162-333	MA-00162-333	1	1	1		1	1	1	1	1	1	0	0	0	1	1	0	0	1	1	1	0	0	0	0	0	0	0	0	1	1	1	1	1	1	0	0	0	1	1	0	0	1	1	1	0	0	0	0
MA-00162-336	MA-00162-336	2	2	2		1	2	2	2	1	0	0	0	0	0	0	0	0	1	0	0	0	0	0	0	0	1	0	0	0	0	0	0	1	0	0	0	0	0	0	0	0	1	0	0	0	0	0	0
MA-00162-337	MA-00162-337	8	8	8		1	8	8	8	2	4	3	2	4	5	4	2	2	2	3	3	3	3	3	3	3	4	3	4	3	3	3	1	2	4	3	2	4	5	4	2	2	2	3	3	3	3	3	3
MA-00162-338	MA-00162-338	4	1	1		1	4	1	1	3	4	1	3	1	0	2	1	1	2	1	1	1	1	1	1	1	2	2	2	2	2	4	3	1	1	0	0	0	0	0	0	0	1	0	0	0	0	0	0
MA-00162-339	MA-00162-339	9	9	9		1	9	9	9	5	3	2	6	6	4	7	5	7	4	5	7	3	4	4	2	3	4	2	4	5	4	6	4	5	3	2	6	6	4	7	5	7	4	5	7	3	4	4	2
MA-00162-340	MA-00162-340	13	13	13		1	13	13	13	3	4	1	2	3	3	2	1	2	1	1	2	9	11	10	10	11	11	12	12	6	5	6	5	3	4	1	2	3	3	2	1	2	1	1	2	9	11	10	10
MA-00162-344	MA-00162-344	15	15	15		1	15	15	15	14	11	11	12	11	13	12	13	11	11	11	9	9	9	11	9	10	10	10	8	11	11	13	11	14	11	11	12	11	13	12	13	11	11	11	9	9	9	11	9
MA-00162-35;MA-00189-83	MA-00162-35	7;1	7;1	7;1		2	7	7	7	3	2	3	4	2	4	2	3	3	3	4	2	3	3	3	3	5	4	4	4	2	3	4	4	3	2	3	4	2	4	2	3	3	3	4	2	3	3	3	3
MA-00162-359	MA-00162-359	9	9	9		1	9	9	9	4	1	2	2	2	4	5	3	4	2	5	3	4	4	4	4	5	5	6	2	5	7	7	5	4	1	2	2	2	4	5	3	4	2	5	3	4	4	4	4
MA-00162-36	MA-00162-36	6	6	6		1	6	6	6	3	4	3	3	5	3	4	3	2	2	4	3	3	1	3	5	2	3	3	3	4	5	3	5	3	4	3	3	5	3	4	3	2	2	4	3	3	1	3	5
MA-00162-360	MA-00162-360	14	14	14		1	14	14	14	3	1	1	3	2	2	1	1	3	2	2	3	7	6	8	8	7	7	8	9	5	3	3	3	3	1	1	3	2	2	1	1	3	2	2	3	7	6	8	8
MA-00162-362	MA-00162-362	14	14	14		1	14	14	14	5	6	7	6	7	9	10	7	7	4	6	9	5	9	8	7	7	6	10	10	5	7	7	6	5	6	7	6	7	9	10	7	7	4	6	9	5	9	8	7
MA-00162-366	MA-00162-366	1	1	1		1	1	1	1	1	1	0	1	1	0	0	0	1	0	0	0	0	1	1	1	0	0	0	0	0	0	1	1	1	1	0	1	1	0	0	0	1	0	0	0	0	1	1	1
MA-00162-380	MA-00162-380	2	2	2		1	2	2	2	0	0	0	1	0	0	1	0	0	0	0	0	0	1	2	1	0	1	1	1	0	0	0	2	0	0	0	1	0	0	1	0	0	0	0	0	0	1	2	1
MA-00162-382	MA-00162-382	1	1	1		1	1	1	1	0	0	0	1	0	1	0	0	0	1	0	0	0	0	0	0	1	0	1	0	0	1	0	0	0	0	0	1	0	1	0	0	0	1	0	0	0	0	0	0
MA-00162-386	MA-00162-386	6	6	6		1	6	6	6	3	4	2	4	3	4	3	3	2	1	4	3	5	3	3	6	5	6	3	4	4	4	4	4	3	4	2	4	3	4	3	3	2	1	4	3	5	3	3	6
MA-00162-387	MA-00162-387	13	13	13		1	13	13	13	5	4	6	5	4	5	6	8	7	6	6	6	4	1	2	3	3	3	2	2	7	6	6	6	5	4	6	5	4	5	6	8	7	6	6	6	4	1	2	3
MA-00162-390	MA-00162-390	6	6	6		1	6	6	6	2	3	2	3	2	2	3	2	1	1	1	3	5	4	5	3	4	3	4	3	2	2	1	2	2	3	2	3	2	2	3	2	1	1	1	3	5	4	5	3
MA-00162-393	MA-00162-393	5	5	5		1	5	5	5	5	5	4	5	5	5	4	4	5	5	5	4	5	5	5	5	5	4	5	5	4	5	4	5	5	5	4	5	5	5	4	4	5	5	5	4	5	5	5	5
MA-00162-398	MA-00162-398	14	14	14		1	14	14	14	11	11	11	10	10	11	9	11	11	10	11	11	11	10	11	9	11	9	11	11	12	10	12	12	11	11	11	10	10	11	9	11	11	10	11	11	11	10	11	9
MA-00162-399	MA-00162-399	13	13	11		1	13	13	11	2	1	2	4	4	3	5	0	1	3	2	2	10	13	10	9	9	6	9	8	4	2	5	3	2	1	2	4	4	3	5	0	1	3	2	2	10	13	10	9
MA-00162-40	MA-00162-40	4	4	3		1	4	4	3	4	3	3	4	4	4	4	4	3	3	3	3	3	4	3	2	3	3	3	3	3	3	4	4	4	3	3	4	4	4	4	4	3	3	3	3	3	4	3	2
MA-00162-401	MA-00162-401	4	4	4		1	4	4	4	0	0	0	0	1	0	0	0	0	1	0	0	0	1	0	0	1	0	0	0	0	1	1	0	0	0	0	0	1	0	0	0	0	1	0	0	0	1	0	0
MA-00162-404	MA-00162-404	2	2	2		1	2	2	2	0	0	0	0	0	0	0	0	0	0	1	0	1	0	0	0	1	0	0	0	0	0	0	1	0	0	0	0	0	0	0	0	0	0	1	0	1	0	0	0
MA-00162-41	MA-00162-41	15	14	13		1	15	14	13	11	12	11	12	12	12	12	10	13	11	12	12	7	8	6	4	11	9	11	9	12	8	11	12	10	12	11	11	12	11	11	10	12	11	12	12	7	7	6	4
MA-00162-412;MA-00189-374	MA-00162-412;MA-00189-374	2;2	2;2	2;2	;	2	2	2	2	0	1	1	0	1	1	1	1	1	1	1	0	1	1	2	1	1	1	1	1	1	1	1	1	0	1	1	0	1	1	1	1	1	1	1	0	1	1	2	1
MA-00162-416;MA-00189-366	MA-00162-416;MA-00189-366	4;3	4;3	4;3	;	2	4	4	4	2	2	3	1	2	2	2	0	1	1	3	2	2	2	3	3	1	1	1	2	1	1	1	2	2	2	3	1	2	2	2	0	1	1	3	2	2	2	3	3
MA-00162-417	MA-00162-417	18	18	18		1	18	18	18	12	13	10	13	12	14	16	15	13	11	14	12	3	3	2	4	5	4	7	6	10	7	8	11	12	13	10	13	12	14	16	15	13	11	14	12	3	3	2	4
MA-00162-419	MA-00162-419	2	2	2		1	2	2	2	0	0	0	0	0	1	0	0	0	0	0	0	0	1	0	0	1	0	0	1	0	0	0	0	0	0	0	0	0	1	0	0	0	0	0	0	0	1	0	0
MA-00162-45	MA-00162-45	12	11	11		1	12	11	11	4	5	6	7	3	7	5	3	5	6	5	6	5	4	3	4	5	5	3	5	4	5	5	6	4	4	5	6	2	6	4	2	4	5	4	5	4	3	2	3
MA-00162-46	MA-00162-46	8	8	8		1	8	8	8	3	3	4	6	5	7	7	5	6	6	6	5	5	3	3	2	3	3	2	3	3	4	4	4	3	3	4	6	5	7	7	5	6	6	6	5	5	3	3	2
MA-00162-48	MA-00162-48	4	4	3		1	4	4	3	0	1	1	1	2	1	1	1	1	1	2	0	1	0	0	0	2	1	0	0	0	1	0	1	0	1	1	1	2	1	1	1	1	1	2	0	1	0	0	0
MA-00162-51	MA-00162-51	3	3	3		1	3	3	3	0	0	0	1	0	0	2	1	0	1	1	1	1	1	2	1	1	1	0	0	0	1	0	1	0	0	0	1	0	0	2	1	0	1	1	1	1	1	2	1
MA-00162-56	MA-00162-56	4	4	4		1	4	4	4	4	3	4	4	4	3	4	4	4	4	3	4	2	2	3	2	4	2	3	4	3	4	3	4	4	3	4	4	4	3	4	4	4	4	3	4	2	2	3	2
MA-00162-57	MA-00162-57	19	19	19		1	19	19	19	17	14	16	17	19	17	17	18	16	16	17	16	14	14	15	13	15	16	17	16	16	14	15	18	17	14	16	17	19	17	17	18	16	16	17	16	14	14	15	13
MA-00162-60	MA-00162-60	19	19	19		1	19	19	19	16	15	14	16	17	17	14	15	16	12	16	16	15	17	16	14	17	16	16	18	14	16	19	14	16	15	14	16	17	17	14	15	16	12	16	16	15	17	16	14
MA-00162-69	MA-00162-69	3	3	3		1	3	3	3	1	3	1	1	2	1	1	1	1	1	1	1	0	0	1	1	1	1	1	1	3	1	2	2	1	3	1	1	2	1	1	1	1	1	1	1	0	0	1	1
MA-00162-7	MA-00162-7	5	5	5		1	5	5	5	2	1	0	2	3	2	2	0	1	2	2	2	3	3	3	4	3	2	2	2	3	0	1	2	2	1	0	2	3	2	2	0	1	2	2	2	3	3	3	4
MA-00162-73	MA-00162-73	8	8	8		1	8	8	8	3	4	4	3	4	3	4	3	2	2	2	2	7	6	6	6	7	6	5	6	5	6	4	5	3	4	4	3	4	3	4	3	2	2	2	2	7	6	6	6
MA-00162-82;MA-00072-201;MA-00112-12	MA-00162-82	21;1;1	20;0;0	20;0;0		3	21	20	20	14	16	15	12	16	16	17	17	14	12	13	14	13	16	16	12	18	13	11	16	16	14	14	15	13	15	14	11	15	15	16	16	13	11	12	13	12	15	15	11
MA-00162-83	MA-00162-83	2	2	2		1	2	2	2	1	1	1	1	1	2	1	1	1	2	1	2	1	1	1	1	1	2	1	1	2	1	2	1	1	1	1	1	1	2	1	1	1	2	1	2	1	1	1	1
MA-00162-88;MA-00162-44	MA-00162-88	19;1	19;1	17;0		2	19	19	17	13	13	16	16	16	14	12	13	16	14	13	13	12	15	12	13	14	15	14	14	14	17	14	13	13	13	16	16	16	14	12	13	16	14	13	13	12	15	12	13
MA-00162-9	MA-00162-9	6	6	6		1	6	6	6	5	3	4	3	4	5	4	4	4	3	4	3	0	0	0	1	0	0	1	2	3	3	3	3	5	3	4	3	4	5	4	4	4	3	4	3	0	0	0	1
MA-00162-91	MA-00162-91	1	1	1		1	1	1	1	0	1	1	0	1	1	1	1	1	1	1	1	0	0	1	0	0	1	0	0	0	1	1	1	0	1	1	0	1	1	1	1	1	1	1	1	0	0	1	0
MA-00162-92	MA-00162-92	7	5	5		1	7	5	5	1	0	2	2	4	4	2	2	2	2	2	1	2	1	2	2	1	2	1	1	2	1	3	1	1	0	2	2	2	4	2	1	2	0	1	1	0	0	0	1
MA-00162-97	MA-00162-97	4	4	4		1	4	4	4	0	1	2	2	1	3	1	2	2	2	3	1	3	1	2	2	2	0	2	3	0	1	1	1	0	1	2	2	1	3	1	2	2	2	3	1	3	1	2	2
MA-00165-8	MA-00165-8	4	4	4		1	4	4	4	2	3	3	2	3	2	2	1	1	2	2	2	1	2	1	1	1	1	2	2	3	2	1	1	2	3	3	2	3	2	2	1	1	2	2	2	1	2	1	1
MA-00171-3	MA-00171-3	2	2	2		1	2	2	2	1	0	1	0	1	0	0	0	1	1	0	1	0	0	1	0	2	0	1	1	1	1	1	0	1	0	1	0	1	0	0	0	1	1	0	1	0	0	1	0
MA-00173-1	MA-00173-1	2	2	2		1	2	2	2	1	1	2	2	2	2	2	1	2	1	2	2	2	2	2	2	2	2	2	1	1	2	1	1	1	1	2	2	2	2	2	1	2	1	2	2	2	2	2	2
MA-00173-104	MA-00173-104	3	3	3		1	3	3	3	0	0	0	0	2	1	3	1	0	1	2	2	0	0	0	1	1	0	0	0	0	0	0	0	0	0	0	0	2	1	3	1	0	1	2	2	0	0	0	1
MA-00173-107;MA-00326-191	MA-00173-107;MA-00326-191	5;4	5;4	5;4	;	2	5	5	5	4	3	3	4	4	3	5	3	2	4	2	3	4	5	5	4	2	3	5	5	2	2	3	3	4	3	3	4	4	3	5	3	2	4	2	3	4	5	5	4
MA-00173-108	MA-00173-108	1	1	1		1	1	1	1	1	0	1	1	1	0	1	1	0	1	1	1	1	1	1	1	1	1	1	1	0	1	1	1	1	0	1	1	1	0	1	1	0	1	1	1	1	1	1	1
MA-00326-188;MA-00173-110	MA-00326-188;MA-00173-110	29;29	29;29	29;29	;	2	29	29	29	27	27	28	25	25	25	25	25	24	25	25	25	26	27	27	26	27	26	28	26	26	25	26	27	27	27	28	25	25	25	25	25	24	25	25	25	26	27	27	26
MA-00173-111	MA-00173-111	2	1	1		1	2	1	1	1	1	1	1	1	0	1	0	0	1	1	1	1	1	1	1	2	0	0	1	1	0	0	0	1	1	1	1	1	0	1	0	0	1	1	1	1	1	1	1
MA-00173-112	MA-00173-112	14	14	11		1	14	14	11	8	6	8	7	8	6	6	6	5	8	7	7	13	14	14	11	14	13	14	13	11	10	11	8	8	6	8	7	8	6	6	6	5	8	7	7	13	14	14	11
MA-00173-116	MA-00173-116	1	1	1		1	1	1	1	0	0	0	0	0	0	0	1	0	0	0	0	0	0	0	0	0	0	0	0	0	0	0	0	0	0	0	0	0	0	0	1	0	0	0	0	0	0	0	0
MA-00173-117	MA-00173-117	3	3	3		1	3	3	3	0	0	0	0	0	1	1	0	1	0	0	0	0	0	1	0	0	0	1	0	0	0	0	0	0	0	0	0	0	1	1	0	1	0	0	0	0	0	1	0
MA-00173-119	MA-00173-119	1	1	1		1	1	1	1	1	0	1	0	1	1	1	0	0	0	0	1	0	1	1	0	1	1	0	0	1	1	1	1	1	0	1	0	1	1	1	0	0	0	0	1	0	1	1	0
MA-00173-126	MA-00173-126	15	15	15		1	15	15	15	10	8	7	6	9	8	7	7	7	8	8	8	14	15	13	15	13	13	11	12	9	7	10	11	10	8	7	6	9	8	7	7	7	8	8	8	14	15	13	15
MA-00173-130	MA-00173-130	2	2	2		1	2	2	2	2	2	2	2	2	2	1	2	2	1	2	2	2	2	2	2	1	2	2	2	2	2	2	2	2	2	2	2	2	2	1	2	2	1	2	2	2	2	2	2
MA-00173-136	MA-00173-136	17	17	15		1	17	17	15	15	16	15	16	15	17	16	16	14	15	13	14	15	15	15	15	13	15	16	16	13	14	15	16	15	16	15	16	15	17	16	16	14	15	13	14	15	15	15	15
MA-00173-140	MA-00173-140	8	8	8		1	8	8	8	6	7	6	7	5	6	6	7	7	6	7	5	7	7	5	7	6	6	7	6	7	8	7	7	6	7	6	7	5	6	6	7	7	6	7	5	7	7	5	7
MA-00173-155;MA-00326-86	MA-00173-155;MA-00326-86	4;2	4;2	4;2	;	2	4	4	4	1	1	0	2	0	1	1	2	2	1	0	1	1	4	2	2	1	1	1	1	1	0	0	1	1	1	0	2	0	1	1	2	2	1	0	1	1	4	2	2
MA-00173-156	MA-00173-156	15	15	15		1	15	15	15	12	14	10	11	11	11	11	9	9	11	10	10	12	12	12	11	12	13	12	13	11	9	12	9	12	14	10	11	11	11	11	9	9	11	10	10	12	12	12	11
MA-00173-158	MA-00173-158	14	14	14		1	14	14	14	4	5	5	5	6	8	8	3	5	5	5	5	7	8	8	9	8	5	6	6	6	6	4	4	4	5	5	5	6	8	8	3	5	5	5	5	7	8	8	9
MA-00173-159	MA-00173-159	22	22	22		1	22	22	22	12	11	16	17	16	19	15	16	13	16	15	13	14	22	17	18	15	18	18	17	17	14	16	15	12	11	16	17	16	19	15	16	13	16	15	13	14	22	17	18
MA-00173-16	MA-00173-16	1	1	1		1	1	1	1	1	0	1	1	1	1	0	1	0	1	1	1	0	1	0	1	0	1	0	0	0	1	1	1	1	0	1	1	1	1	0	1	0	1	1	1	0	1	0	1
MA-00173-161	MA-00173-161	4	4	4		1	4	4	4	1	2	1	2	3	2	2	1	2	1	3	3	3	3	2	3	3	3	2	3	1	2	2	2	1	2	1	2	3	2	2	1	2	1	3	3	3	3	2	3
MA-00173-164	MA-00173-164	44	44	44		1	44	44	44	32	36	36	35	36	37	35	36	31	33	31	32	32	34	35	27	33	35	35	37	37	35	35	33	32	36	36	35	36	37	35	36	31	33	31	32	32	34	35	27
MA-00173-165	MA-00173-165	16	16	16		1	16	16	16	10	9	7	7	6	10	8	5	7	7	8	9	9	11	9	9	11	10	8	11	8	9	7	8	10	9	7	7	6	10	8	5	7	7	8	9	9	11	9	9
MA-00173-168	MA-00173-168	22	22	22		1	22	22	22	5	6	8	7	8	6	9	8	8	9	8	8	15	18	16	15	17	16	19	17	11	10	9	10	5	6	8	7	8	6	9	8	8	9	8	8	15	18	16	15
MA-00173-171	MA-00173-171	4	4	4		1	4	4	4	1	2	2	1	2	1	2	3	1	1	0	2	0	1	0	0	0	2	1	0	2	2	1	2	1	2	2	1	2	1	2	3	1	1	0	2	0	1	0	0
MA-00173-172	MA-00173-172	2	2	2		1	2	2	2	0	1	0	0	0	0	0	1	1	0	1	0	1	0	1	0	0	0	0	0	1	1	0	0	0	1	0	0	0	0	0	1	1	0	1	0	1	0	1	0
MA-00173-173	MA-00173-173	5	5	5		1	5	5	5	1	2	2	2	3	3	4	1	1	3	1	3	0	1	1	1	1	1	1	2	1	1	1	1	1	2	2	2	3	3	4	1	1	3	1	3	0	1	1	1
MA-00173-174	MA-00173-174	2	2	2		1	2	2	2	0	0	0	0	0	0	0	0	0	0	0	0	0	0	0	0	0	2	1	1	0	0	0	1	0	0	0	0	0	0	0	0	0	0	0	0	0	0	0	0
MA-00173-186	MA-00173-186	16	16	16		1	16	16	16	11	9	9	11	12	13	12	12	9	7	9	10	12	10	13	12	14	11	11	15	12	13	12	15	11	9	9	11	12	13	12	12	9	7	9	10	12	10	13	12
MA-00173-19	MA-00173-19	28	28	28		1	28	28	28	14	9	14	11	15	15	14	18	18	21	22	16	0	3	3	0	3	3	1	3	2	3	4	3	14	9	14	11	15	15	14	18	18	21	22	16	0	3	3	0
MA-00173-194	MA-00173-194	2	2	2		1	2	2	2	0	0	0	1	1	1	1	1	0	2	2	1	0	1	0	1	0	1	0	0	1	1	0	2	0	0	0	1	1	1	1	1	0	2	2	1	0	1	0	1
MA-00173-196	MA-00173-196	3	3	3		1	3	3	3	2	3	2	1	1	2	1	1	1	1	3	1	1	0	0	1	2	0	2	2	0	0	2	2	2	3	2	1	1	2	1	1	1	1	3	1	1	0	0	1
MA-00173-20	MA-00173-20	18	18	18		1	18	18	18	16	17	17	17	16	17	17	17	17	16	17	17	16	17	17	14	17	16	17	17	17	17	17	17	16	17	17	17	16	17	17	17	17	16	17	17	16	17	17	14
MA-00173-201	MA-00173-201	7	7	7		1	7	7	7	5	5	2	5	6	4	3	5	4	4	3	3	2	3	2	3	2	2	2	3	3	1	4	3	5	5	2	5	6	4	3	5	4	4	3	3	2	3	2	3
MA-00173-202	MA-00173-202	10	10	10		1	10	10	10	8	8	9	8	7	9	9	8	8	5	7	9	7	8	9	7	7	9	9	10	9	8	9	9	8	8	9	8	7	9	9	8	8	5	7	9	7	8	9	7
MA-00173-204	MA-00173-204	2	2	2		1	2	2	2	1	1	0	0	0	1	1	1	0	0	0	0	0	1	2	0	1	0	1	1	1	1	1	1	1	1	0	0	0	1	1	1	0	0	0	0	0	1	2	0
MA-00173-21	MA-00173-21	2	2	2		1	2	2	2	2	1	2	2	2	2	2	1	2	2	2	2	1	2	2	2	2	2	1	2	2	2	2	2	2	1	2	2	2	2	2	1	2	2	2	2	1	2	2	2
MA-00173-211	MA-00173-211	10	10	10		1	10	10	10	6	9	8	7	9	5	7	8	8	7	9	8	8	9	8	7	9	8	9	8	7	8	8	7	6	9	8	7	9	5	7	8	8	7	9	8	8	9	8	7
MA-00173-215	MA-00173-215	1	1	1		1	1	1	1	0	0	0	0	0	1	0	0	0	0	0	0	0	1	1	0	0	0	1	1	0	0	0	0	0	0	0	0	0	1	0	0	0	0	0	0	0	1	1	0
MA-00173-216	MA-00173-216	27	27	27		1	27	27	27	22	25	24	25	23	23	24	25	22	22	22	23	25	24	23	21	24	27	26	25	21	22	24	24	22	25	24	25	23	23	24	25	22	22	22	23	25	24	23	21
MA-00173-218	MA-00173-218	12	12	12		1	12	12	12	5	6	5	6	6	6	7	5	7	10	9	8	7	6	8	5	5	5	6	5	5	3	7	8	5	6	5	6	6	6	7	5	7	10	9	8	7	6	8	5
MA-00173-220	MA-00173-220	6	6	6		1	6	6	6	4	4	5	4	5	5	6	5	5	4	5	4	6	4	3	3	5	6	4	5	5	5	5	4	4	4	5	4	5	5	6	5	5	4	5	4	6	4	3	3
MA-00173-221	MA-00173-221	4	4	4		1	4	4	4	1	3	1	2	1	2	1	3	1	1	1	2	1	2	1	1	2	2	2	1	3	2	2	2	1	3	1	2	1	2	1	3	1	1	1	2	1	2	1	1
MA-00173-224	MA-00173-224	2	2	2		1	2	2	2	2	0	1	2	0	1	1	1	0	0	1	1	0	0	0	0	0	0	0	0	0	0	0	1	2	0	1	2	0	1	1	1	0	0	1	1	0	0	0	0
MA-00173-229	MA-00173-229	10	9	9		1	10	9	9	6	4	7	7	7	8	7	6	6	5	6	4	6	8	9	7	8	8	6	9	6	6	8	6	5	3	6	6	6	7	6	5	5	4	5	3	5	7	8	6
MA-00173-23	MA-00173-23	3	3	3		1	3	3	3	3	3	3	3	3	3	3	3	2	2	2	3	3	2	2	3	2	2	2	3	3	2	2	3	3	3	3	3	3	3	3	3	2	2	2	3	3	2	2	3
MA-00173-230	MA-00173-230	2	2	2		1	2	2	2	2	0	0	0	1	0	1	1	1	0	2	0	0	0	0	0	0	0	0	1	1	0	0	0	2	0	0	0	1	0	1	1	1	0	2	0	0	0	0	0
MA-00173-232;MA-00326-65	MA-00173-232;MA-00326-65	12;11	12;11	12;11	;	2	12	12	12	10	10	11	10	10	10	10	10	10	9	11	10	9	10	11	11	11	10	10	10	11	11	10	10	10	10	11	10	10	10	10	10	10	9	11	10	9	10	11	11
MA-00173-235	MA-00173-235	1	1	1		1	1	1	1	0	0	0	0	0	0	0	0	0	0	0	0	0	1	0	0	0	0	0	0	0	0	0	0	0	0	0	0	0	0	0	0	0	0	0	0	0	1	0	0
MA-00173-236	MA-00173-236	4	4	4		1	4	4	4	1	3	2	0	1	1	1	1	0	1	1	1	2	1	1	1	1	0	2	1	1	1	1	1	1	3	2	0	1	1	1	1	0	1	1	1	2	1	1	1
MA-00173-240	MA-00173-240	23	23	23		1	23	23	23	18	20	15	15	14	16	18	15	16	13	16	18	15	20	18	14	16	16	15	17	13	17	14	16	18	20	15	15	14	16	18	15	16	13	16	18	15	20	18	14
MA-00173-241	MA-00173-241	25	25	25		1	25	25	25	15	18	15	16	19	19	19	17	13	16	16	15	20	21	19	17	19	17	17	22	16	12	17	19	15	18	15	16	19	19	19	17	13	16	16	15	20	21	19	17
MA-00173-30	MA-00173-30	9	9	9		1	9	9	9	1	2	1	2	3	2	1	2	2	0	0	0	3	3	4	3	3	5	4	4	4	2	1	1	1	2	1	2	3	2	1	2	2	0	0	0	3	3	4	3
MA-00173-31	MA-00173-31	7	7	7		1	7	7	7	5	3	1	1	4	2	3	3	2	1	2	3	1	0	0	1	1	2	1	1	1	1	1	3	5	3	1	1	4	2	3	3	2	1	2	3	1	0	0	1
MA-00173-39	MA-00173-39	2	1	1		1	2	1	1	1	1	0	0	2	0	0	0	1	0	2	1	2	2	2	2	2	1	1	2	2	1	2	2	0	0	0	0	1	0	0	0	1	0	1	1	1	1	1	1
MA-00173-40;MA-00139-103	MA-00173-40	4;1	4;1	4;1		2	4	4	4	1	2	1	2	2	0	0	1	0	0	1	0	0	1	0	1	1	1	2	2	3	1	0	2	1	2	1	2	2	0	0	1	0	0	1	0	0	1	0	1
MA-00173-41	MA-00173-41	5	5	5		1	5	5	5	2	2	1	2	0	2	1	2	2	2	1	0	1	0	0	2	2	1	1	1	1	1	3	2	2	2	1	2	0	2	1	2	2	2	1	0	1	0	0	2
MA-00173-49;MA-00173-46	MA-00173-49	4;1	4;1	4;1		2	4	4	4	1	1	3	1	4	3	2	1	2	1	2	1	0	0	0	0	1	0	0	1	2	3	1	1	1	1	3	1	4	3	2	1	2	1	2	1	0	0	0	0
MA-00173-56	MA-00173-56	1	1	1		1	1	1	1	1	0	0	1	1	1	1	0	0	0	1	1	0	1	1	0	1	1	1	1	1	1	1	1	1	0	0	1	1	1	1	0	0	0	1	1	0	1	1	0
MA-00173-8	MA-00173-8	4	2	2		1	4	2	2	2	3	3	3	2	3	3	3	3	2	2	2	3	3	3	3	3	2	3	3	3	3	3	3	1	1	1	1	1	1	1	1	1	0	0	0	1	1	1	1
MA-00173-81	MA-00173-81	1	1	1		1	1	1	1	1	1	0	0	1	0	0	1	0	0	0	0	1	1	1	1	1	0	1	1	1	1	1	1	1	1	0	0	1	0	0	1	0	0	0	0	1	1	1	1
MA-00173-83	MA-00173-83	1	1	1		1	1	1	1	1	1	1	1	1	1	1	1	0	0	0	0	0	1	1	0	0	1	1	1	0	0	1	0	1	1	1	1	1	1	1	1	0	0	0	0	0	1	1	0
MA-00173-84	MA-00173-84	2	2	2		1	2	2	2	1	1	0	1	1	2	1	1	1	1	1	1	2	0	1	1	1	2	0	2	1	2	1	2	1	1	0	1	1	2	1	1	1	1	1	1	2	0	1	1
MA-00173-87	MA-00173-87	4	2	2		1	4	2	2	1	2	2	2	2	2	2	3	2	2	2	2	1	1	1	1	1	2	1	2	2	2	1	2	0	0	0	0	0	0	0	1	0	0	0	0	0	0	0	0
MA-00326-166;MA-00173-88	MA-00326-166;MA-00173-88	3;3	3;3	3;3	;	2	3	3	3	3	3	3	3	3	2	3	3	3	2	2	3	2	2	2	2	2	2	2	2	3	3	3	2	3	3	3	3	3	2	3	3	3	2	2	3	2	2	2	2
MA-00173-89	MA-00173-89	2	2	2		1	2	2	2	1	1	1	1	1	1	2	1	2	1	1	1	1	2	2	2	1	2	2	2	1	0	1	1	1	1	1	1	1	1	2	1	2	1	1	1	1	2	2	2
MA-00173-93;MA-00072-42	MA-00173-93	12;1	12;1	12;1		2	12	12	12	3	3	2	1	4	2	3	2	2	2	2	3	8	8	6	7	6	8	7	6	5	4	2	4	3	3	2	1	4	2	3	2	2	2	2	3	8	8	6	7
MA-00173-94	MA-00173-94	1	1	1		1	1	1	1	1	0	0	0	0	0	0	1	1	0	0	0	1	1	0	0	1	1	0	1	0	0	0	1	1	0	0	0	0	0	0	1	1	0	0	0	1	1	0	0
MA-00174-1	MA-00174-1	1	1	1		1	1	1	1	0	0	0	0	1	0	0	0	0	0	0	0	0	0	0	0	0	0	0	0	0	0	0	0	0	0	0	0	1	0	0	0	0	0	0	0	0	0	0	0
MA-00180-2	MA-00180-2	3	3	3		1	3	3	3	2	3	2	2	1	1	3	2	2	3	1	1	2	3	3	3	3	3	2	3	2	2	2	1	2	3	2	2	1	1	3	2	2	3	1	1	2	3	3	3
MA-00182-1	MA-00182-1	4	4	4		1	4	4	4	2	2	3	3	1	4	4	2	1	0	0	3	0	0	3	0	1	1	1	1	0	1	1	2	2	2	3	3	1	4	4	2	1	0	0	3	0	0	3	0
MA-00182-101	MA-00182-101	5	5	5		1	5	5	5	5	4	4	4	4	2	4	5	4	4	4	4	3	4	5	4	5	4	4	4	4	4	4	4	5	4	4	4	4	2	4	5	4	4	4	4	3	4	5	4
MA-00182-102	MA-00182-102	11	11	11		1	11	11	11	3	4	2	4	5	3	4	3	2	6	5	4	8	5	6	5	5	6	6	7	4	4	4	5	3	4	2	4	5	3	4	3	2	6	5	4	8	5	6	5
MA-00182-11	MA-00182-11	14	14	14		1	14	14	14	3	2	2	6	3	3	5	7	4	4	2	2	4	5	3	5	3	2	2	2	4	6	3	7	3	2	2	6	3	3	5	7	4	4	2	2	4	5	3	5
MA-00182-113;MA-00067-27	MA-00182-113;MA-00067-27	9;6	9;6	9;6	;	2	9	9	9	6	7	9	6	8	8	7	7	9	9	7	9	7	8	8	7	5	8	6	8	6	7	8	6	6	7	9	6	8	8	7	7	9	9	7	9	7	8	8	7
MA-00182-115	MA-00182-115	15	15	15		1	15	15	15	11	13	11	14	12	13	12	11	10	9	7	12	13	12	13	14	11	14	11	14	10	12	15	15	11	13	11	14	12	13	12	11	10	9	7	12	13	12	13	14
MA-00182-118	MA-00182-118	23	23	23		1	23	23	23	16	19	20	19	19	20	19	19	17	18	17	17	16	19	19	18	19	19	20	22	16	15	18	18	16	19	20	19	19	20	19	19	17	18	17	17	16	19	19	18
MA-00182-126	MA-00182-126	3	3	3		1	3	3	3	2	3	3	2	3	3	3	2	2	3	2	2	1	2	2	1	2	2	2	2	2	2	2	2	2	3	3	2	3	3	3	2	2	3	2	2	1	2	2	1
MA-00182-127	MA-00182-127	4	4	4		1	4	4	4	2	1	1	3	2	2	1	2	0	1	1	1	0	3	1	0	1	2	2	2	3	2	2	2	2	1	1	3	2	2	1	2	0	1	1	1	0	3	1	0
MA-00182-128	MA-00182-128	6	6	5		1	6	6	5	4	5	5	5	4	4	5	4	4	5	3	4	3	6	5	4	5	5	4	3	5	5	5	4	4	5	5	5	4	4	5	4	4	5	3	4	3	6	5	4
MA-00182-13	MA-00182-13	4	4	4		1	4	4	4	2	1	1	2	2	1	1	2	1	1	1	1	2	1	1	1	1	1	2	2	1	1	2	1	2	1	1	2	2	1	1	2	1	1	1	1	2	1	1	1
MA-00182-130	MA-00182-130	2	2	2		1	2	2	2	1	0	2	2	2	2	0	2	2	1	2	0	2	1	1	2	1	1	1	1	0	1	0	2	1	0	2	2	2	2	0	2	2	1	2	0	2	1	1	2
MA-00182-131	MA-00182-131	5	5	5		1	5	5	5	4	3	3	2	2	2	3	3	2	2	3	2	4	2	1	3	3	3	3	4	2	2	3	3	4	3	3	2	2	2	3	3	2	2	3	2	4	2	1	3
MA-00182-133	MA-00182-133	14	14	14		1	14	14	14	2	2	1	0	3	1	0	1	0	0	0	0	10	10	12	8	9	8	11	10	2	1	2	2	2	2	1	0	3	1	0	1	0	0	0	0	10	10	12	8
MA-00182-134	MA-00182-134	5	5	5		1	5	5	5	1	3	2	2	2	1	0	3	1	2	1	0	3	1	0	1	3	1	2	3	2	1	1	1	1	3	2	2	2	1	0	3	1	2	1	0	3	1	0	1
MA-00182-14	MA-00182-14	2	2	2		1	2	2	2	2	1	2	2	2	2	2	2	2	2	2	2	1	0	0	0	0	0	0	0	1	1	2	1	2	1	2	2	2	2	2	2	2	2	2	2	1	0	0	0
MA-00182-143;MA-00178-1	MA-00182-143	12;1	2;0	2;0		2	12	2	2	10	9	8	9	9	7	9	11	6	8	8	8	9	10	9	8	9	11	9	9	11	10	11	10	0	0	0	1	1	0	0	1	0	0	0	0	1	1	1	1
MA-00182-146	MA-00182-146	7	7	7		1	7	7	7	5	5	6	6	6	6	5	6	5	6	6	6	6	6	6	5	4	5	4	6	5	5	6	5	5	5	6	6	6	6	5	6	5	6	6	6	6	6	6	5
MA-00182-148	MA-00182-148	8	8	8		1	8	8	8	7	7	7	7	8	8	7	7	7	8	7	7	4	6	5	6	8	7	6	8	7	7	7	8	7	7	7	7	8	8	7	7	7	8	7	7	4	6	5	6
MA-00182-150	MA-00182-150	4	3	3		1	4	3	3	3	2	3	2	2	2	3	3	2	1	1	1	0	0	0	0	0	0	0	1	2	3	1	2	2	1	2	1	1	1	2	2	1	0	0	0	0	0	0	0
MA-00182-151	MA-00182-151	1	1	1		1	1	1	1	0	0	0	0	0	0	1	0	0	0	0	0	0	0	0	0	0	0	0	0	0	0	0	0	0	0	0	0	0	0	1	0	0	0	0	0	0	0	0	0
MA-00182-156	MA-00182-156	6	6	4		1	6	6	4	5	6	6	4	5	5	6	4	3	5	4	5	4	5	5	4	6	6	6	6	4	5	5	5	5	6	6	4	5	5	6	4	3	5	4	5	4	5	5	4
MA-00182-157	MA-00182-157	1	1	1		1	1	1	1	0	0	0	0	0	0	0	0	0	0	0	0	0	0	0	0	1	0	0	0	0	0	0	0	0	0	0	0	0	0	0	0	0	0	0	0	0	0	0	0
MA-00182-159	MA-00182-159	12	3	3		1	12	3	3	6	6	6	6	6	6	7	8	7	7	6	7	10	10	9	10	9	7	8	9	7	8	8	7	1	1	0	0	0	1	1	2	1	2	0	1	2	2	2	2
MA-00182-160	MA-00182-160	19	19	9		1	19	19	9	10	10	8	11	10	10	8	11	8	10	7	8	10	11	15	12	11	11	11	12	13	7	10	9	10	10	8	11	10	10	8	11	8	10	7	8	10	11	15	12
MA-00182-162	MA-00182-162	5	3	3		1	5	3	3	5	5	5	5	5	5	5	5	5	5	5	5	5	5	5	5	5	5	5	5	5	5	5	5	3	3	3	3	3	3	3	3	3	3	3	3	3	3	3	3
MA-00182-163	MA-00182-163	10	10	10		1	10	10	10	4	6	6	6	6	6	5	6	6	6	6	7	6	7	7	8	5	7	6	6	5	7	6	6	4	6	6	6	6	6	5	6	6	6	6	7	6	7	7	8
MA-00182-164	MA-00182-164	3	3	3		1	3	3	3	1	1	0	1	0	0	1	0	1	0	0	1	0	0	1	1	1	1	1	1	1	2	0	1	1	1	0	1	0	0	1	0	1	0	0	1	0	0	1	1
MA-00182-165	MA-00182-165	10	10	10		1	10	10	10	1	0	2	0	1	0	1	0	2	1	0	0	6	8	7	9	6	8	8	9	0	1	1	1	1	0	2	0	1	0	1	0	2	1	0	0	6	8	7	9
MA-00182-166	MA-00182-166	3	3	3		1	3	3	3	2	1	1	2	2	0	1	1	1	1	1	1	1	1	1	3	2	1	2	2	2	1	1	2	2	1	1	2	2	0	1	1	1	1	1	1	1	1	1	3
MA-00182-167	MA-00182-167	1	1	1		1	1	1	1	0	0	0	0	0	0	0	0	0	0	0	0	0	1	0	0	0	0	0	1	1	1	0	1	0	0	0	0	0	0	0	0	0	0	0	0	0	1	0	0
MA-00182-17	MA-00182-17	11	11	11		1	11	11	11	6	3	6	4	5	4	4	2	3	4	4	3	4	5	5	5	3	6	3	3	3	4	4	4	6	3	6	4	5	4	4	2	3	4	4	3	4	5	5	5
MA-00182-170	MA-00182-170	2	2	2		1	2	2	2	2	1	1	1	1	1	1	1	2	1	2	2	1	1	1	1	1	1	1	1	1	1	1	1	2	1	1	1	1	1	1	1	2	1	2	2	1	1	1	1
MA-00182-172	MA-00182-172	18	4	4		1	18	4	4	16	17	13	16	16	16	15	16	13	11	15	15	13	15	17	14	17	13	16	16	14	15	16	15	3	4	2	3	3	3	2	4	1	1	3	2	1	2	3	2
MA-00182-179	MA-00182-179	3	3	3		1	3	3	3	0	0	0	0	0	0	1	0	0	0	0	0	2	0	0	1	0	0	0	0	1	0	0	1	0	0	0	0	0	0	1	0	0	0	0	0	2	0	0	1
MA-00182-181	MA-00182-181	2	2	2		1	2	2	2	1	1	1	1	1	1	1	1	1	1	1	2	2	1	1	1	1	1	1	1	1	1	1	1	1	1	1	1	1	1	1	1	1	1	1	2	2	1	1	1
MA-00182-184	MA-00182-184	4	4	4		1	4	4	4	2	4	2	2	2	3	1	1	3	2	3	2	0	0	2	1	1	1	2	3	2	2	3	3	2	4	2	2	2	3	1	1	3	2	3	2	0	0	2	1
MA-00182-186	MA-00182-186	4	4	4		1	4	4	4	2	3	2	3	3	3	3	2	3	2	2	2	2	2	2	2	2	3	2	3	3	2	3	2	2	3	2	3	3	3	3	2	3	2	2	2	2	2	2	2
MA-00182-187	MA-00182-187	7	7	7		1	7	7	7	5	6	3	4	5	5	4	6	3	1	1	2	2	1	2	2	4	3	3	6	4	2	7	4	5	6	3	4	5	5	4	6	3	1	1	2	2	1	2	2
MA-00182-191	MA-00182-191	3	3	3		1	3	3	3	1	2	0	1	1	1	0	1	1	1	1	0	1	1	1	1	2	1	1	1	1	1	2	1	1	2	0	1	1	1	0	1	1	1	1	0	1	1	1	1
MA-00182-192	MA-00182-192	4	4	4		1	4	4	4	1	3	2	1	1	2	2	2	1	3	2	1	4	4	3	2	3	3	2	2	2	2	2	2	1	3	2	1	1	2	2	2	1	3	2	1	4	4	3	2
MA-00182-194	MA-00182-194	59	59	54		1	59	59	54	47	51	48	50	49	52	52	48	45	45	47	45	33	33	33	27	35	37	39	40	46	44	50	51	47	51	48	50	49	52	52	48	45	45	47	45	33	33	33	27
MA-00182-2	MA-00182-2	5	5	5		1	5	5	5	1	2	1	1	2	1	1	0	3	1	1	1	1	2	2	1	2	2	1	1	1	1	1	1	1	2	1	1	2	1	1	0	3	1	1	1	1	2	2	1
MA-00182-204	MA-00182-204	6	6	6		1	6	6	6	5	5	5	5	5	6	5	5	6	5	5	5	3	1	2	1	4	3	5	5	5	5	5	5	5	5	5	5	5	6	5	5	6	5	5	5	3	1	2	1
MA-00182-205	MA-00182-205	9	9	9		1	9	9	9	6	7	7	8	8	7	6	7	8	7	7	8	7	7	6	6	8	6	6	5	7	6	8	4	6	7	7	8	8	7	6	7	8	7	7	8	7	7	6	6
MA-00182-206	MA-00182-206	15	7	7		1	15	7	7	6	7	6	7	6	7	6	5	4	4	6	9	7	12	11	9	8	8	11	10	7	5	8	8	2	3	1	3	1	3	2	2	1	1	1	4	4	5	5	6
MA-00182-212	MA-00182-212	2	1	1		1	2	1	1	0	1	0	0	2	1	0	0	0	1	0	0	1	1	1	1	1	1	1	0	1	1	1	0	0	0	0	0	1	0	0	0	0	0	0	0	0	0	0	0
MA-00182-213	MA-00182-213	2	2	2		1	2	2	2	2	1	1	1	2	2	2	1	1	2	1	2	2	2	2	2	1	2	2	2	1	1	1	2	2	1	1	1	2	2	2	1	1	2	1	2	2	2	2	2
MA-00182-22	MA-00182-22	15	5	5		1	15	5	5	10	11	5	9	10	11	10	12	7	9	7	9	4	9	9	5	9	8	10	9	11	8	10	9	2	3	0	2	2	2	2	3	2	3	1	3	0	2	1	1
MA-00182-221	MA-00182-221	4	4	4		1	4	4	4	1	1	2	2	3	0	1	1	1	1	1	2	3	3	3	3	2	3	1	4	1	1	3	3	1	1	2	2	3	0	1	1	1	1	1	2	3	3	3	3
MA-00182-223;MA-00184-232	MA-00182-223;MA-00184-232	7;6	7;6	7;6	;	2	7	7	7	4	5	5	4	6	6	7	3	6	5	6	6	4	7	5	6	3	5	6	3	5	4	4	4	4	5	5	4	6	6	7	3	6	5	6	6	4	7	5	6
MA-00182-226	MA-00182-226	1	1	1		1	1	1	1	1	1	1	1	1	1	1	1	1	1	1	1	1	1	1	1	1	1	1	1	1	1	1	1	1	1	1	1	1	1	1	1	1	1	1	1	1	1	1	1
MA-00182-227	MA-00182-227	9	8	8		1	9	8	8	7	5	4	6	7	5	5	7	6	3	4	6	3	5	5	3	6	5	7	7	7	5	5	6	6	4	3	5	6	4	4	6	5	2	3	5	2	4	4	2
MA-00182-230	MA-00182-230	3	3	3		1	3	3	3	3	3	2	2	2	2	2	2	1	2	2	3	1	2	2	1	3	3	2	3	2	1	2	2	3	3	2	2	2	2	2	2	1	2	2	3	1	2	2	1
MA-00182-232	MA-00182-232	9	9	9		1	9	9	9	7	6	4	5	7	7	4	5	3	6	5	4	1	4	1	4	2	3	3	3	4	4	3	3	7	6	4	5	7	7	4	5	3	6	5	4	1	4	1	4
MA-00182-233	MA-00182-233	3	2	2		1	3	2	2	1	1	2	2	1	2	2	2	2	2	2	1	1	1	0	1	1	1	1	1	1	2	1	1	1	1	1	2	1	2	1	2	2	2	2	1	1	1	0	1
MA-00182-24	MA-00182-24	12	10	10		1	12	10	10	5	5	6	8	6	6	7	7	9	6	10	7	7	7	9	7	6	5	5	5	6	5	5	6	3	3	4	6	4	4	5	5	7	4	8	5	5	5	7	5
MA-00182-241;MA-00184-126	MA-00182-241;MA-00184-126	6;5	6;5	6;5	;	2	6	6	6	3	4	3	4	5	5	4	3	3	4	3	4	5	5	4	4	3	4	4	3	4	3	3	4	3	4	3	4	5	5	4	3	3	4	3	4	5	5	4	4
MA-00182-248	MA-00182-248	3	3	3		1	3	3	3	1	0	0	1	0	0	0	1	2	2	1	2	0	0	0	0	0	0	0	0	1	0	1	1	1	0	0	1	0	0	0	1	2	2	1	2	0	0	0	0
MA-00182-252	MA-00182-252	9	9	9		1	9	9	9	7	6	5	6	7	6	5	6	6	4	7	4	7	7	7	6	8	8	8	7	7	6	7	7	7	6	5	6	7	6	5	6	6	4	7	4	7	7	7	6
MA-00182-257	MA-00182-257	2	2	2		1	2	2	2	0	0	1	0	1	1	1	1	0	1	0	0	0	2	0	2	1	1	2	2	1	1	1	0	0	0	1	0	1	1	1	1	0	1	0	0	0	2	0	2
MA-00182-264	MA-00182-264	8	8	8		1	8	8	8	3	2	2	3	4	4	3	2	1	1	4	1	3	2	4	1	1	1	1	2	3	1	4	3	3	2	2	3	4	4	3	2	1	1	4	1	3	2	4	1
MA-00182-268	MA-00182-268	2	2	2		1	2	2	2	1	1	1	1	1	1	2	1	1	0	1	1	0	1	1	0	0	1	1	1	1	1	0	1	1	1	1	1	1	1	2	1	1	0	1	1	0	1	1	0
MA-00182-270	MA-00182-270	3	3	3		1	3	3	3	2	2	2	2	3	2	3	2	2	2	1	2	2	2	3	2	2	2	3	3	2	2	3	3	2	2	2	2	3	2	3	2	2	2	1	2	2	2	3	2
MA-00182-277	MA-00182-277	8	8	8		1	8	8	8	6	6	4	4	5	8	4	8	5	6	6	4	2	4	5	5	3	3	4	5	4	3	7	5	6	6	4	4	5	8	4	8	5	6	6	4	2	4	5	5
MA-00182-279	MA-00182-279	11	11	10		1	11	11	10	9	10	9	9	10	10	9	9	7	8	9	9	8	9	9	9	9	9	8	9	9	10	10	11	9	10	9	9	10	10	9	9	7	8	9	9	8	9	9	9
MA-00182-280;MA-00297-5	MA-00182-280	14;1	14;1	14;1		2	14	14	14	1	1	0	0	2	1	1	0	1	1	1	1	14	14	12	14	13	9	9	12	4	3	2	2	1	1	0	0	2	1	1	0	1	1	1	1	14	14	12	14
MA-00182-282	MA-00182-282	3	3	3		1	3	3	3	2	2	3	2	3	3	3	2	2	1	1	1	3	3	3	2	2	2	3	3	3	3	3	3	2	2	3	2	3	3	3	2	2	1	1	1	3	3	3	2
MA-00182-283	MA-00182-283	51	51	35		1	51	51	35	43	41	41	42	43	42	42	42	39	36	40	41	40	46	45	38	44	41	42	45	43	39	43	45	43	41	41	42	43	42	42	42	39	36	40	41	40	46	45	38
MA-00182-286	MA-00182-286	2	2	2		1	2	2	2	1	1	1	0	1	0	1	1	0	1	0	1	0	0	0	1	0	0	0	0	0	1	1	2	1	1	1	0	1	0	1	1	0	1	0	1	0	0	0	1
MA-00182-288	MA-00182-288	21	21	21		1	21	21	21	18	19	20	19	18	20	18	18	19	19	19	18	18	19	18	17	19	18	20	19	18	17	18	19	18	19	20	19	18	20	18	18	19	19	19	18	18	19	18	17
MA-00182-299;MA-00184-30	MA-00182-299;MA-00184-30	2;1	2;1	2;1	;	2	2	2	2	0	1	0	1	1	1	1	1	0	0	0	1	0	2	2	0	0	1	1	2	0	1	0	1	0	1	0	1	1	1	1	1	0	0	0	1	0	2	2	0
MA-00182-306	MA-00182-306	9	9	9		1	9	9	9	4	6	4	6	4	6	4	3	3	2	2	3	7	6	6	5	6	4	4	5	3	4	4	5	4	6	4	6	4	6	4	3	3	2	2	3	7	6	6	5
MA-00182-308	MA-00182-308	4	4	4		1	4	4	4	4	2	1	3	3	3	3	3	0	1	0	1	0	1	0	0	1	1	1	1	4	1	3	2	4	2	1	3	3	3	3	3	0	1	0	1	0	1	0	0
MA-00182-312	MA-00182-312	10	10	10		1	10	10	10	0	2	1	1	1	1	2	0	1	0	1	1	7	9	9	5	3	6	2	7	3	4	1	2	0	2	1	1	1	1	2	0	1	0	1	1	7	9	9	5
MA-00182-317;MA-00184-103	MA-00182-317	8;1	8;1	8;1		2	8	8	8	5	4	3	5	4	6	5	4	5	4	5	4	5	4	3	4	4	5	5	7	4	2	6	5	5	4	3	5	4	6	5	4	5	4	5	4	5	4	3	4
MA-00182-324	MA-00182-324	11	7	7		1	11	7	7	3	4	3	5	6	5	6	7	6	5	6	5	5	8	9	8	6	8	7	8	5	4	6	5	0	1	1	1	2	1	2	3	2	2	2	1	2	4	5	4
MA-00182-326	MA-00182-326	7	1	1		1	7	1	1	5	5	5	5	5	5	5	4	6	4	6	5	7	7	5	7	5	6	5	6	6	5	5	5	0	0	0	0	0	0	0	0	0	0	0	0	1	1	0	1
MA-00182-329	MA-00182-329	1	1	1		1	1	1	1	0	0	0	0	0	0	0	0	0	0	0	0	0	0	0	0	0	0	0	0	0	0	0	1	0	0	0	0	0	0	0	0	0	0	0	0	0	0	0	0
MA-00182-331	MA-00182-331	2	2	2		1	2	2	2	2	0	1	2	2	2	2	2	1	1	1	1	1	2	2	1	2	2	2	2	2	2	1	2	2	0	1	2	2	2	2	2	1	1	1	1	1	2	2	1
MA-00182-342	MA-00182-342	9	9	9		1	9	9	9	6	5	5	8	7	6	6	4	5	4	5	4	7	4	6	3	5	4	5	5	4	6	5	6	6	5	5	8	7	6	6	4	5	4	5	4	7	4	6	3
MA-00182-344	MA-00182-344	63	17	17		1	63	17	17	57	55	51	54	58	52	53	55	50	47	49	49	42	60	56	46	53	52	53	57	56	56	54	56	13	12	11	11	14	8	11	11	12	12	13	10	7	14	12	9
MA-00182-345	MA-00182-345	6	6	1		1	6	6	1	3	1	1	3	3	2	3	2	2	2	3	3	4	4	5	3	3	4	3	4	4	2	3	3	3	1	1	3	3	2	3	2	2	2	3	3	4	4	5	3
MA-00182-346	MA-00182-346	6	6	6		1	6	6	6	5	2	5	6	2	5	4	4	3	3	3	4	0	0	0	0	0	0	0	0	4	6	4	5	5	2	5	6	2	5	4	4	3	3	3	4	0	0	0	0
MA-00182-347	MA-00182-347	5	5	5		1	5	5	5	4	3	4	5	5	3	5	4	3	2	3	3	2	2	2	2	3	3	3	2	2	4	2	4	4	3	4	5	5	3	5	4	3	2	3	3	2	2	2	2
MA-00182-350	MA-00182-350	3	3	3		1	3	3	3	1	1	2	1	0	0	1	1	1	0	1	1	1	0	1	1	1	0	1	1	1	1	1	0	1	1	2	1	0	0	1	1	1	0	1	1	1	0	1	1
MA-00182-351	MA-00182-351	38	38	38		1	38	38	38	33	34	33	34	33	35	33	34	33	31	30	31	30	31	29	27	29	35	31	31	34	32	33	35	33	34	33	34	33	35	33	34	33	31	30	31	30	31	29	27
MA-00182-352	MA-00182-352	2	2	2		1	2	2	2	1	1	1	1	1	1	1	1	1	1	1	1	2	1	1	1	1	2	1	1	1	1	0	1	1	1	1	1	1	1	1	1	1	1	1	1	2	1	1	1
MA-00182-353	MA-00182-353	2	2	2		1	2	2	2	0	2	0	0	0	1	0	0	0	1	0	1	1	0	1	0	1	1	0	0	0	0	1	0	0	2	0	0	0	1	0	0	0	1	0	1	1	0	1	0
MA-00182-354	MA-00182-354	1	1	1		1	1	1	1	0	0	0	0	0	0	0	0	1	1	1	0	0	0	1	0	1	0	0	0	0	0	0	0	0	0	0	0	0	0	0	0	1	1	1	0	0	0	1	0
MA-00182-356	MA-00182-356	11	11	11		1	11	11	11	8	8	9	11	7	10	10	9	9	8	6	6	8	9	8	8	8	9	11	9	8	7	9	10	8	8	9	11	7	10	10	9	9	8	6	6	8	9	8	8
MA-00182-360	MA-00182-360	10	10	10		1	10	10	10	9	9	8	9	9	9	9	9	8	8	8	6	8	8	8	8	8	8	8	9	8	8	10	9	9	9	8	9	9	9	9	9	8	8	8	6	8	8	8	8
MA-00182-361	MA-00182-361	8	8	8		1	8	8	8	4	5	1	3	4	5	4	5	2	2	2	4	0	4	5	1	3	3	4	4	3	3	3	4	4	5	1	3	4	5	4	5	2	2	2	4	0	4	5	1
MA-00182-363	MA-00182-363	3	3	3		1	3	3	3	1	2	0	2	2	2	2	1	2	1	0	2	2	2	0	0	0	1	0	1	1	1	0	1	1	2	0	2	2	2	2	1	2	1	0	2	2	2	0	0
MA-00182-368	MA-00182-368	6	6	6		1	6	6	6	3	2	0	3	2	2	1	1	1	1	2	2	2	3	2	3	2	3	3	4	3	3	3	4	3	2	0	3	2	2	1	1	1	1	2	2	2	3	2	3
MA-00182-43	MA-00182-43	3	3	3		1	3	3	3	3	1	3	3	3	2	3	2	2	2	2	3	3	3	3	3	3	3	3	3	3	3	3	3	3	1	3	3	3	2	3	2	2	2	2	3	3	3	3	3
MA-00182-47	MA-00182-47	3	3	3		1	3	3	3	1	0	1	1	2	1	0	0	1	0	0	0	0	0	0	2	0	1	1	0	0	1	0	0	1	0	1	1	2	1	0	0	1	0	0	0	0	0	0	2
MA-00182-48	MA-00182-48	4	4	4		1	4	4	4	3	3	1	2	2	2	2	3	1	3	0	2	1	1	1	1	2	1	2	1	1	2	1	4	3	3	1	2	2	2	2	3	1	3	0	2	1	1	1	1
MA-00182-49	MA-00182-49	6	6	6		1	6	6	6	1	1	2	2	1	4	2	3	1	2	1	1	2	2	4	2	2	1	1	2	3	2	1	2	1	1	2	2	1	4	2	3	1	2	1	1	2	2	4	2
MA-00182-50	MA-00182-50	1	1	1		1	1	1	1	0	0	0	0	0	0	0	0	0	0	0	0	1	0	0	1	0	0	0	0	0	0	0	0	0	0	0	0	0	0	0	0	0	0	0	0	1	0	0	1
MA-00320-163;MA-00182-54	MA-00320-163;MA-00182-54	8;8	8;8	8;8	;	2	8	8	8	7	6	8	7	7	8	6	7	5	6	5	7	7	6	6	7	6	8	6	5	6	6	7	7	7	6	8	7	7	8	6	7	5	6	5	7	7	6	6	7
MA-00182-55	MA-00182-55	1	1	1		1	1	1	1	1	0	0	1	1	1	1	1	1	1	1	1	1	1	1	1	1	1	1	1	1	1	1	1	1	0	0	1	1	1	1	1	1	1	1	1	1	1	1	1
MA-00182-63	MA-00182-63	15	15	7		1	15	15	7	8	9	7	9	9	8	9	10	8	7	7	9	12	15	14	13	14	13	14	14	11	11	12	10	8	9	7	9	9	8	9	10	8	7	7	9	12	15	14	13
[truncated: 1,462 more rows]
[truncated: 201 more columns]

## Sheet: Sheet2
Platform	RT [min]	Name	HMDB ID	PubChem ID	KEGG ID	Formula	Molecular Weight（Quant mass for GCMS）	RSD QC Areas [%]	RSD corr. QC Areas [%]	Norm. Area: Time241	Norm. Area: Time242	Norm. Area: Time243	Norm. Area: Time244	Norm. Area: Time245	Norm. Area: Time481	Norm. Area: Time482	Norm. Area: Time483	Norm. Area: Time484	Norm. Area: Time485	Norm. Area: Time961	Norm. Area: Time962	Norm. Area: Time963	Norm. Area: Time964	Norm. Area: Time965	Norm. Area: Time1441	Norm. Area: Time1442	Norm. Area: Time1443	Norm. Area: Time1444	Norm. Area: Time1445	Norm. Area: Time1681	Norm. Area: Time1682	Norm. Area: Time1683	Norm. Area: Time1684	Norm. Area: Time1685	Norm. Area: Time2161	Norm. Area: Time2162	Norm. Area: Time2163	Norm. Area: Time2164	Norm. Area: Time2165	Norm. Area: QC1	Norm. Area: QC2	Norm. Area: QC3	Norm. Area: QC4	Norm. Area: QC5	Norm. Area: QC6	Norm. Area: QC7	Norm. Area: QC8	Norm. Area: QC9	Norm. Area: QC10
RPLC-pos	9.977	11-α-Hydroxy-17-methyltestosterone	NA	NA	C14555	C20 H30 O3	318.22	11	8	148428	144191	180374	180266	119745	211989	261159	291595	263018	290556	165951	170335	209169	174930	170301	62982.9	80313	89343.9	78168.5	64083.5	68912.4	65596.9	45772.1	77512.8	76239.6	8576.56	14787.6	11215.6	15135.2	13135.9	185229	188867	190764	188330	155915	216427	172196	181850	181070	180099
RPLC-pos	8.719	12-Aminododecanoic acid	NA	NA	NA	C12 H25 N O2	215.189	18	18	46569.9	48229.7	31961.5	33066	60734.1	35409.9	49045.7	56783.5	28141.3	41783.9	53639.2	40264.9	53425.8	52809.3	50967.3	69399	45678	65794.7	32994.7	28453.7	40905.1	46180	51363	28813.9	42205.7	46873.6	35736.1	42209.3	34168.2	44021.3	48648.3	50525	48218.4	52459.3	48252.6	80317.4	54349.9	46731.3	50501.6	49499.1
RPLC-pos	11.665	15-Deoxy-Δ12,14-prostaglandin A1	NA	NA	NA	C20 H30 O3	318.22	8	7	2.4702e+06	2.60157e+06	2.84254e+06	3.08982e+06	2.9502e+06	4.00437e+06	4.54971e+06	4.7655e+06	4.78752e+06	4.82403e+06	1.76032e+06	1.67827e+06	2.07029e+06	2.14917e+06	2.23797e+06	1.83216e+06	2.04774e+06	1.93367e+06	1.94562e+06	1.96051e+06	2.69487e+06	2.444e+06	2.53315e+06	2.76014e+06	2.8344e+06	636799	726142	692894	747970	698372	3.03115e+06	3.18814e+06	3.22572e+06	3.211e+06	3.25121e+06	3.91131e+06	3.17188e+06	3.13562e+06	3.28952e+06	3.18246e+06
RPLC-pos	10.998	19-Nortestosterone	HMDB0002725	9904	C07254	C18 H26 O2	274.193	13	12	35191.1	32365.7	37637.2	38820.8	36362.8	72292.5	83710.7	85331.9	93944.9	84049.8	22816.5	22358.2	29386.5	31387.8	32784.4	7992.04	9468.69	11362.4	11095.9	9257.67	9318.08	8016.62	8656.42	11101.5	10336.8	1297.33	4092.27	3873.2	3982.39	3447.66	36324.9	36834.7	37803	36722	39423.2	51350.7	34998.6	38391.8	41781.2	38975.9
RPLC-pos	9.594	2-Amino-1,3,4-octadecanetriol	NA	NA	C12144	C18 H39 N O3	317.293	12	11	99250.7	64880.6	64917.2	115321	86406.8	53272.1	63729.3	65209.5	67023.3	70577.4	90558.1	31895.9	37007.5	32577.7	33252.1	23463.8	21371.9	47458.4	30771.7	12136.1	11612.7	16483.4	20595.2	13200.2	14565.3	16657	14833.6	17056.8	16020.4	16163.2	51636.8	51556.6	53013.5	51323.6	52909.8	69517.3	47879.7	49111.8	55585.7	55145.9
RPLC-pos	1.364	2-Hydroxycinnamic acid	HMDB0002641	637540	C01772	C9 H8 O3	164.047	10	7	1.09398e+07	1.01751e+07	1.3009e+07	1.23003e+07	1.06056e+07	8.45668e+06	1.05451e+07	1.08613e+07	9.66231e+06	1.08464e+07	8.66599e+06	9.57485e+06	1.13032e+07	8.77525e+06	1.05422e+07	5.43202e+06	6.50599e+06	6.41274e+06	5.99566e+06	5.78335e+06	5.43982e+06	6.07465e+06	5.63257e+06	5.30255e+06	5.80665e+06	4.94957e+06	5.7945e+06	4.60064e+06	5.4289e+06	4.32044e+06	9.07924e+06	8.83094e+06	8.61694e+06	9.29007e+06	9.14983e+06	1.04138e+07	8.23786e+06	8.39088e+06	8.80976e+06	8.91743e+06
RPLC-pos	7.451	3',5'-Dimethoxy-4'-hydroxyacetophenone	NA	NA	C10664	C10 H12 O4	196.073	14	13	1096.44	13183.5	5845.84	1224.44	1923.99	2169.91	1211.54	1261.46	9780.48	1314.26	1444	2422.28	1332.63	1146.33	1135.55	28169.6	73094.2	264378	57177.9	17489.2	12408.8	1154.52	1079.33	1187.32	14836.1	1749.56	1083.67	1128.74	1131.59	1013.9	9209.69	9085.88	9438.31	9592.1	10102.1	13654.2	9605.84	10540.4	9937.72	10163.4
RPLC-pos	5.461	5'-S-Methyl-5'-thioadenosine	HMDB0001173	439176	C00170	C11 H15 N5 O3 S	297.09	8	6	3.41594e+06	3.41579e+06	3.76997e+06	4.04399e+06	3.64051e+06	2.22395e+06	2.59472e+06	2.79668e+06	2.58859e+06	2.70858e+06	4.2459e+06	4.66895e+06	5.00499e+06	4.8182e+06	4.94975e+06	5.62969e+06	5.95574e+06	6.54549e+06	5.65109e+06	6.10029e+06	4.4864e+06	4.16866e+06	4.11072e+06	4.19838e+06	4.5181e+06	2.69301e+06	3.21474e+06	3.08301e+06	3.42876e+06	3.26332e+06	4.21206e+06	4.27462e+06	4.40897e+06	4.35886e+06	4.52435e+06	5.04049e+06	4.26192e+06	4.42098e+06	4.53666e+06	4.60042e+06
RPLC-pos	10.297	5-trans Prostaglandin F2β	NA	NA	NA	C20 H34 O5	376.222	17	17	121045	97507.2	153445	119492	107466	242540	276267	304910	241265	300513	75491.8	52624.8	69889.2	83112.6	92328.9	32527.4	41368.8	35152.4	38436.9	30660.2	39926.7	38563.9	38605.8	37441.1	36010.2	3979.51	6940.67	4848.39	7858	5347.32	97072.6	97927.9	132638	120224	136275	159911	86608.2	115830	128011	118017
RPLC-pos	12.749	9-Oxo-10(E),12(E)-octadecadienoic acid	NA	NA	C14766	C18 H30 O3	294.219	13	12	24968.9	44918.6	43944	23949.6	32257.9	59905.5	51799.7	83097.1	61444.2	74665.9	38360.9	28963.8	42678.1	44597.8	41686.8	61538.2	109478	221473	171372	35843.2	40418.1	32284.9	18833.3	31046.4	40922.9	32422	26857.6	24021.5	24027.9	24657.8	51143.1	47435.4	47876	46290.3	43709.7	62147.8	61273	53599.6	49176.2	45822.8
RPLC-pos	1.199	Acetylcholine	HMDB0000895	187	C01996	C7 H15 N O2	145.11	11	8	1.81166e+07	1.36749e+07	1.86061e+07	1.9083e+07	1.80751e+07	1.6896e+07	1.88267e+07	1.86792e+07	1.80979e+07	2.06154e+07	5.45537e+06	5.33777e+06	5.74651e+06	6.28861e+06	6.37887e+06	3.4433e+06	3.93212e+06	4.10854e+06	3.59024e+06	3.59026e+06	2.58272e+06	2.40163e+06	2.56235e+06	2.62483e+06	2.77314e+06	1.64264e+06	1.63746e+06	1.5145e+06	1.67603e+06	1.5216e+06	1.01385e+07	1.09489e+07	1.03519e+07	1.15529e+07	1.0799e+07	1.30512e+07	9.88643e+06	1.15871e+07	1.13043e+07	1.10496e+07
RPLC-pos	1.242	Adenosine diphosphate (ADP)	HMDB0001341	6022	C00008	C10 H15 N5 O10 P2	427.029	28	26	429801	366558	919561	956176	512424	113180	103217	194761	118276	107838	72956.7	69164.8	153639	71993.7	75117.4	95441.8	107831	139743	120901	108677	53600.3	104791	80352.8	49306.8	99180.9	46474.9	39775.3	26617.1	52161	27723.5	130237	146302	107817	158161	146872	108737	133442	236899	114046	134495
RPLC-pos	0.941	Argininosuccinic acid	HMDB0000052	16950	C03406	C10 H18 N4 O6	290.123	6	6	2.38074e+06	2.07017e+06	2.27595e+06	2.20939e+06	2.27225e+06	3.0235e+06	2.65948e+06	2.79419e+06	2.78378e+06	2.8728e+06	438323	653561	685275	452488	450668	295956	322296	321091	344949	254915	192171	203354	166518	147782	210594	76410.6	67453.8	66508.8	73714.1	71483.3	1.17852e+06	1.11025e+06	1.09249e+06	1.0979e+06	1.21705e+06	1.1574e+06	1.09622e+06	1.14181e+06	1.28509e+06	1.13165e+06
RPLC-pos	0.972	Betaine	HMDB0000043	247	C00719	C5 H11 N O2	117.079	6	5	6.88239e+07	6.55909e+07	6.5238e+07	7.39091e+07	6.67759e+07	4.96541e+07	5.43652e+07	6.10107e+07	5.77177e+07	5.89567e+07	2.20778e+07	2.47414e+07	2.49886e+07	2.54453e+07	2.52955e+07	6.0753e+06	6.74657e+06	6.78514e+06	6.80294e+06	6.50194e+06	3.33786e+06	3.34256e+06	3.50924e+06	3.39379e+06	3.77383e+06	1.31215e+06	1.72677e+06	1.76342e+06	1.70735e+06	1.60517e+06	3.07275e+07	3.09706e+07	3.05608e+07	3.06745e+07	2.9998e+07	3.26773e+07	2.84983e+07	3.48464e+07	3.05957e+07	2.92071e+07
RPLC-pos	11.224	Bis(4-ethylbenzylidene)sorbitol	NA	NA	NA	C24 H30 O6	414.204	12	5	568586	633950	487816	608739	524810	584313	524916	551748	537383	625359	638998	450494	512187	454304	459195	545436	524252	672356	505793	486827	556289	512891	471805	474648	488799	505554	493881	519584	476405	508028	512395	590764	579549	577700	578165	612170	581808	540503	570993	555340
RPLC-pos	12.908	Carbaprostacyclin	NA	NA	NA	C21 H34 O4	367.272	8	8	119675	118238	149807	113160	129529	131644	161933	151730	163189	159260	46097.5	36469.7	51365.1	49377.9	50112	54969.9	69889.8	72893.1	66098.3	60526.8	86853.3	76074	78434	85539.3	76799.4	22895.1	26585	22910.3	25908.6	22976.8	99161.4	107026	112280	114279	111933	131430	124406	110793	107270	110010
RPLC-pos	18.569	Choline	HMDB0000097	305	C00114	C5 H13 N O	103.1	17	9	27291.2	23619	32737.4	32084.4	21839.6	48292.1	35589	32039.1	42014.6	51938.2	65657.8	82090.5	98052.2	76953.1	109000	64246.2	70007.3	97921.5	104040	58860.6	72458.2	70948.3	63812	81424.1	50661	85230.1	66218.9	85657.5	66191.3	97264.8	60077	66875.9	72213.4	58251.1	68244.2	81589.4	68598.1	63939.9	66083	63650.4
RPLC-pos	7.006	Cyclo(leucylprolyl)	HMDB0034276	102892	NA	C11 H18 N2 O2	210.137	24	23	18090.5	20097.2	13959.2	11393.7	13412.3	26884.6	31977.7	34015.8	30309.9	31740.7	11522.3	10449.9	7148.06	8270.85	10089.6	22667.8	28167.2	27625.3	24084	18901.8	10608.7	11808.6	9032.86	14741	11089.7	56055.7	60959.2	61060.9	63969.6	51508.2	22193.8	27765.7	28249.1	22560	31370.2	45457.6	26546.8	24532.4	33009.3	26239.7
RPLC-pos	18.583	Cyclohexylamine	HMDB0031404	7965	C00571	C6 H13 N	99.1053	20	14	48865.1	37423.1	39917.2	45951.2	44005.8	43393.4	43781.6	43525.9	43924.5	49445	40504.4	34312.5	43916.2	63933.6	44750.5	40905.6	43625.5	42220.4	53441.3	38477.9	37040.6	45560.3	39992.3	49698.4	46831.9	42480.5	36894.6	50456.1	42386.5	41005.6	54274.8	48041.6	47940.1	54608.1	43900.4	46977.2	31065.9	46747.5	50661.7	50199.8
RPLC-pos	1	D-(+)-Maltose	HMDB0000163	10991489	C01971	C12 H22 O11	364.098	20	19	104702	126263	61636.5	82920.8	118427	371118	704235	740927	732564	369003	513552	481035	541561	593856	583313	1.17272e+06	1.30899e+06	1.35344e+06	1.39594e+06	1.1847e+06	1.57164e+06	1.36645e+06	1.66153e+06	1.54094e+06	1.73558e+06	4.67124e+06	4.90153e+06	5.01567e+06	5.35798e+06	4.92163e+06	1.00779e+06	1.23643e+06	1.06967e+06	733138	1.22049e+06	1.22525e+06	1.23363e+06	1.26376e+06	1.36734e+06	838145
RPLC-pos	1.019	Diaminopimelic acid	HMDB0001370	439283	NA	C7 H14 N2 O4	190.095	14	14	5.68169e+06	4.08175e+06	5.35128e+06	3.41369e+06	3.60565e+06	3.43741e+06	3.30971e+06	3.51778e+06	3.20791e+06	1.40855e+06	1.57644e+06	2.04253e+06	1.77436e+06	1.86287e+06	1.73309e+06	1.36267e+06	1.49802e+06	1.37641e+06	1.28749e+06	1.31183e+06	1.66414e+06	1.55988e+06	1.49238e+06	1.44692e+06	1.47284e+06	989871	1.1955e+06	1.00331e+06	1.09382e+06	988542	3.53001e+06	3.41073e+06	2.41065e+06	2.84281e+06	3.95977e+06	2.65108e+06	3.31404e+06	3.40384e+06	3.1509e+06	3.10165e+06
RPLC-pos	0.89	DL-Arginine	HMDB0000517	6322	C02385	C6 H14 N4 O2	174.112	6	5	9.55774e+07	9.14326e+07	9.73631e+07	9.88103e+07	9.71515e+07	1.126e+08	1.09522e+08	1.07368e+08	9.42251e+07	1.0297e+08	1.32144e+08	1.35873e+08	1.3931e+08	1.37991e+08	1.36118e+08	1.16641e+08	1.1123e+08	1.12457e+08	1.17447e+08	1.14225e+08	1.04725e+08	1.03252e+08	1.09332e+08	1.06801e+08	1.00225e+08	8.58646e+07	8.46735e+07	8.07614e+07	8.24738e+07	8.12346e+07	1.01082e+08	1.0745e+08	1.10429e+08	1.17077e+08	1.07623e+08	1.06853e+08	1.05409e+08	1.15116e+08	1.14721e+08	1.02293e+08
RPLC-pos	12.784	Eicosapentaenoic acid	HMDB0001999	446284	C06428	C20 H30 O2	302.225	8	8	94935	92341.4	103156	115739	111307	296342	340039	353516	309305	309841	262722	162771	190480	230040	229551	173863	191409	169079	167345	156532	249193	218505	236016	245411	189494	92226.3	112254	99670.9	101985	89743.2	194356	216568	202513	209787	201456	254807	219915	211228	216232	205363
RPLC-pos	6.026	Flavin mononucleotide (FMN)	HMDB0001520	643976	C00061	C17 H21 N4 O9 P	456.104	8	8	57279.6	74678.1	83165.8	79701.7	67815.1	90088.9	95422.2	96728.3	103295	107342	87727.8	68634.9	83497.7	69050.7	69636.9	48243.5	54585.6	51194.6	42198.4	39503.3	42828.8	47003.7	55574.6	67907.2	40485.2	69446.8	76204.5	67612.7	77392.3	72045.5	81843.3	71430.5	87067.1	81992.7	80486.1	90332.2	86623.7	83732.7	92812.2	80137
RPLC-pos	12.378	Glycerophospho-N-palmitoyl ethanolamine	NA	NA	NA	C21 H44 N O7 P	453.285	18	18	160548	184354	173774	173323	160313	178666	236992	232004	217160	253066	147097	113275	114532	126601	117299	160076	167255	190377	151167	156489	106109	87349	94883.1	106756	91308.4	112833	118572	103628	117117	106357	95714.4	198905	191304	199486	208095	209248	184035	166270	190387	181741
RPLC-pos	1.274	Glycylproline	HMDB0000721	79101	NA	C7 H12 N2 O3	172.085	12	12	877677	903164	878147	914948	824618	880450	1.23054e+06	1.09368e+06	1.02573e+06	1.17663e+06	350588	356859	388064	377332	365763	269965	302698	293639	215574	264093	245115	310511	279012	281580	209885	170335	221344	167763	216118	153394	625912	641849	534965	528283	593181	756662	552072	647627	607352	503920
RPLC-pos	4.449	Guanine	HMDB0000132	764	C00242	C5 H5 N5 O	151.05	31	31	393269	621080	402874	632004	536514	377571	413995	533632	410604	424592	284069	272718	200808	213218	225516	355887	338716	456760	374107	318310	409036	385985	340087	321316	354591	366680	542227	436474	492372	433551	484411	390295	504413	413645	542618	978201	621495	397432	467139	463512
RPLC-pos	14.638	Hexadecanamide	HMDB0012273	69421	NA	C16 H33 N O	255.256	17	17	30437.5	59515.3	40139.2	37772.3	40997.9	31528.3	42238	43409.5	22357.4	50465.2	34019.3	34837.4	33999.8	36073.3	41659.6	31057.7	25115	37472	31792.6	33572.7	53123.7	64515.5	38748.8	38878.2	48945.6	35366.1	47164.1	37466.7	48779.7	35965.8	25701.6	31378.7	38824.9	36932	40933	45885.7	33765.4	36605.8	26263.6	34735.4
RPLC-pos	0.953	L(-)-Carnitine	HMDB0000062	2724480	D02176	C7 H15 N O3	161.105	6	5	4.40517e+06	4.7634e+06	5.47338e+06	5.30528e+06	4.86055e+06	5.07008e+06	6.55054e+06	6.37534e+06	6.22056e+06	5.62642e+06	5.73045e+06	5.6034e+06	6.3012e+06	6.39863e+06	6.43438e+06	3.36183e+06	1.91205e+06	3.68413e+06	3.59474e+06	3.53605e+06	2.99909e+06	3.00671e+06	3.1224e+06	3.05161e+06	3.17442e+06	6.57195e+06	6.50251e+06	6.37425e+06	7.11166e+06	6.80001e+06	5.06593e+06	5.46631e+06	5.20176e+06	5.64706e+06	5.39536e+06	5.93541e+06	5.0951e+06	5.57992e+06	5.40598e+06	5.26806e+06
RPLC-pos	1.296	L-Alanyl-L-proline	HMDB0028695	NA	NA	C8 H14 N2 O3	186.101	8	6	4.88133e+06	5.08653e+06	4.87872e+06	5.72407e+06	4.76181e+06	4.84559e+06	5.97519e+06	6.36201e+06	6.1836e+06	6.20819e+06	1.89966e+06	2.45728e+06	2.53617e+06	2.52687e+06	2.62209e+06	2.08355e+06	2.38942e+06	1.68761e+06	2.15932e+06	1.7245e+06	1.7848e+06	2.31025e+06	1.77956e+06	1.84234e+06	1.85192e+06	1.10482e+06	1.33811e+06	1.56609e+06	1.59408e+06	1.24451e+06	3.5059e+06	3.65283e+06	3.63258e+06	3.94682e+06	3.82157e+06	4.33161e+06	3.53465e+06	3.66819e+06	3.64173e+06	3.61612e+06
RPLC-pos	1.295	L-Glutathione (reduced)	HMDB0000125	124886	C00051	C10 H17 N3 O6 S	307.084	22	13	1.4419e+07	1.34465e+07	1.63678e+07	2.0545e+07	1.77293e+07	1.76635e+07	2.11062e+07	2.14031e+07	2.56886e+07	2.86226e+07	7.88264e+06	1.03096e+07	8.88541e+06	1.06732e+07	1.06116e+07	8.04987e+06	1.00777e+07	1.23843e+07	1.31091e+07	1.27656e+07	2.70537e+06	2.07547e+06	3.16514e+06	2.16849e+06	3.27526e+06	7.69403e+06	1.00706e+07	1.13097e+07	1.0583e+07	1.22771e+07	8.52781e+06	1.00402e+07	9.17057e+06	1.00516e+07	9.28241e+06	1.23778e+07	1.11499e+07	9.07925e+06	8.87258e+06	1.05109e+07
RPLC-pos	1.299	L-Glutathione oxidized	HMDB0003337	975	C00127	C20 H32 N6 O12 S2	612.153	11	8	7.41157e+06	8.39314e+06	7.91231e+06	8.18062e+06	7.82091e+06	7.69486e+06	8.72276e+06	8.88408e+06	8.18317e+06	8.44614e+06	1.14073e+07	8.29829e+06	1.04077e+07	1.20425e+07	1.12303e+07	9.47875e+06	8.87911e+06	7.1652e+06	7.6676e+06	8.61282e+06	1.21045e+07	1.11093e+07	1.13064e+07	1.15048e+07	1.23042e+07	1.00182e+07	7.57301e+06	6.90553e+06	7.43253e+06	6.352e+06	1.42062e+07	1.52826e+07	1.27596e+07	1.62511e+07	1.4807e+07	1.42095e+07	1.24798e+07	1.56228e+07	1.47284e+07	1.39435e+07
RPLC-pos	0.801	L-Lysine	HMDB0000182	5962	C00047	C6 H14 N2 O2	146.106	5	5	5.11736e+07	4.76392e+07	5.32196e+07	5.68344e+07	5.07332e+07	6.49677e+07	6.90779e+07	6.46277e+07	6.81972e+07	6.56681e+07	7.11535e+07	7.60132e+07	8.304e+07	8.24149e+07	8.23437e+07	7.17548e+07	7.34352e+07	7.15145e+07	6.9145e+07	6.83393e+07	6.57222e+07	6.06213e+07	5.90299e+07	6.21404e+07	6.40987e+07	5.04717e+07	4.79675e+07	4.94289e+07	4.89409e+07	4.64922e+07	6.29177e+07	6.31419e+07	6.71879e+07	7.03834e+07	6.76596e+07	7.22067e+07	6.34976e+07	6.89329e+07	6.66853e+07	6.46365e+07
RPLC-pos	4.776	L-Phenylalanine	HMDB0000159	6140	C00079	C9 H11 N O2	165.079	10	10	3.52263e+07	3.83249e+07	3.88475e+07	4.59581e+07	3.43136e+07	5.57246e+07	7.12684e+07	7.24035e+07	6.77502e+07	7.22478e+07	2.45775e+07	2.84427e+07	3.11909e+07	2.82968e+07	2.81357e+07	2.31164e+07	2.84426e+07	2.70573e+07	2.27996e+07	2.14761e+07	2.43516e+07	2.95749e+07	2.3332e+07	2.3512e+07	2.20644e+07	1.44474e+07	1.89786e+07	1.59142e+07	2.0077e+07	1.61679e+07	3.6811e+07	3.79747e+07	3.65331e+07	3.68027e+07	3.9658e+07	4.99587e+07	3.80228e+07	3.64232e+07	3.87619e+07	3.78904e+07
RPLC-pos	1.281	L-Pyroglutamic acid	HMDB0000267	7405	C01879	C5 H7 N O3	129.043	23	23	3.63421e+06	4.34114e+06	3.99448e+06	2.96483e+06	4.56706e+06	1.75219e+06	2.06429e+06	2.01411e+06	1.49513e+06	1.8198e+06	1.12907e+06	1.74878e+06	1.68385e+06	2.84309e+06	1.51304e+06	952012	776845	717075	954516	736976	848211	692401	803748	943455	934658	951443	1.02337e+06	867608	936628	971284	2.4796e+06	1.64179e+06	1.93974e+06	1.5562e+06	2.20441e+06	3.13619e+06	2.16913e+06	2.70433e+06	2.40355e+06	1.74497e+06
RPLC-pos	1.273	Maltol	HMDB0030776	8369	C11918	C6 H6 O3	126.032	9	9	2.19131e+06	2.50242e+06	4.69663e+06	3.24499e+06	3.85202e+06	2.00148e+06	2.31664e+06	2.20137e+06	1.9787e+06	2.32949e+06	666788	1.03148e+06	1.07475e+06	1.30935e+06	1.19447e+06	784958	915377	710646	613456	655208	727902	678640	789782	590652	556785	491916	550280	620087	635137	665544	1.91297e+06	1.77085e+06	1.85589e+06	1.82059e+06	2.02023e+06	2.01325e+06	1.56083e+06	1.93515e+06	1.60291e+06	2.01461e+06
RPLC-pos	1.014	Maltotriose	HMDB0001262	439586	C01835	C18 H32 O16	504.169	36	34	180406	232588	198110	86130.3	278622	260568	493059	522066	358482	174049	601386	613646	607191	526058	519003	633353	611995	574797	548733	516106	603256	585499	553228	520211	506031	335184	364858	313344	295394	282702	285322	606330	277777	282646	589018	252017	484571	499968	507849	252655
RPLC-pos	1.122	Melezitose	HMDB0011730	92817	C08243	C18 H32 O16	504.169	24	16	516946	605858	300496	480541	300388	468779	532293	439141	560463	456235	210456	264775	266613	286828	283204	121097	128292	146166	157244	152305	89875.6	95601.5	83459.4	95824	102312	50474.6	49615.1	45236.6	50866	54236.4	486536	390040	429948	492821	397206	467666	322760	397020	386352	579761
RPLC-pos	3.849	Mevalonolactone	HMDB0006024	5325923	NA	C6 H10 O3	130.063	22	15	243131	351410	291542	176122	115330	234262	217687	275439	222868	244878	1.24202e+06	1.11683e+06	1.181e+06	1.18408e+06	1.45493e+06	3.07002e+06	3.68475e+06	3.26581e+06	3.73183e+06	3.04744e+06	4.82968e+06	5.08934e+06	4.17034e+06	3.66201e+06	4.10783e+06	588827	532391	541541	554825	591659	1.30131e+06	1.34054e+06	1.46997e+06	1.22872e+06	1.81844e+06	1.82034e+06	1.37941e+06	1.30034e+06	1.27863e+06	1.33342e+06
RPLC-pos	1.009	N3,N4-Dimethyl-L-arginine	NA	NA	NA	C8 H18 N4 O2	202.143	6	4	2.14141e+06	645439	1.59504e+06	1.22527e+06	1.58655e+06	2.62926e+06	3.31503e+06	2.86872e+06	2.99681e+06	3.10944e+06	7.13152e+06	7.269e+06	7.77762e+06	7.87982e+06	7.93781e+06	9.39584e+06	1.01372e+07	9.63295e+06	9.91371e+06	9.09731e+06	1.00142e+07	9.19768e+06	9.39705e+06	9.57276e+06	1.01306e+07	9.72848e+06	1.05344e+07	9.92226e+06	1.05269e+07	1.06234e+07	7.63735e+06	7.98204e+06	7.53001e+06	8.26398e+06	8.20323e+06	8.30992e+06	7.91831e+06	7.96049e+06	8.46229e+06	7.65184e+06
RPLC-pos	0.877	N8-Acetylspermidine	HMDB0002189	123689	C01029	C9 H21 N3 O	93.5842	9	9	272547	278890	382344	372983	308138	227542	237376	267674	267517	318757	359131	430118	327390	383544	414199	361192	374802	352273	315409	434811	1.04514e+06	1.34352e+06	1.51074e+06	1.41431e+06	1.53257e+06	1.04205e+06	1.23407e+06	1.00506e+06	1.20033e+06	1.03626e+06	657769	674811	576276	756013	686561	731359	578075	606328	675272	642728
RPLC-pos	6.656	N-Acetyl-L-leucine	HMDB0011756	70912	C02710	C8 H15 N O3	173.105	16	16	82843.5	62081.7	79431.8	70749.7	63322.6	89550.8	143967	129719	135654	153320	64013.5	79159.6	85401.8	83393.6	83152	56643.4	65512.6	62138.3	75382.1	68491.9	71023.9	58414.8	57783.4	64559.7	67481	13881.5	15793	14368.8	31898.7	15203.9	69984.5	96596.8	96727.3	79060.1	97037.7	114756	64621.9	80329.4	93965.2	87537.5
RPLC-pos	6.495	N-Acetyl-L-tyrosine	HMDB0000866	68310	C01657	C11 H13 N O4	223.084	6	6	22411.9	23880.5	25094.5	26664.5	18426.1	18758.9	19603.1	23483.6	21503.4	22509	12542.2	14029.7	12253.6	13738.1	12645.9	15676.8	16947.9	22187.4	15118.6	16488.5	15760.2	13394.9	14416.8	14298.9	11524	644614	658478	622099	686170	618861	96715.5	94487.5	108607	101163	105207	114649	96748.5	102481	105346	100762
RPLC-pos	1.256	N-Acetylneuraminic acid	HMDB0000230	445063	C19910	C11 H19 N O9	309.107	24	15	1.65411e+06	1.39712e+06	1.89552e+06	1.76357e+06	2.00803e+06	266510	187802	193825	216831	211423	131946	211411	219399	363026	359389	348747	442015	314352	490415	569677	356629	278691	407343	371963	482845	251173	250393	236440	268067	276103	509994	642649	512977	716386	565038	579988	413413	577967	523569	641086
RPLC-pos	6.398	N-Acetylserotonin	HMDB0001238	903	C00978	C12 H14 N2 O2	201.079	9	7	66628.2	73907.6	74342.6	80633.5	80871.8	88895.2	124810	117235	116687	117483	84013.7	81248.1	87333	87555.4	71880.8	88534.7	104554	86585.2	87938.3	77807.6	86463.5	108560	105887	122211	90444.9	88363.2	110396	100199	109321	106158	111854	116656	109902	128369	120548	134109	114501	118910	128373	121447
RPLC-pos	1.059	N-Acetyl-α-D-glucosamine	HMDB0000215	439174	C00140	C8 H15 N O6	221.09	17	16	213253	89606	121259	164402	153296	478752	843120	404841	663193	626882	1.35183e+06	1.37744e+06	1.26343e+06	1.37925e+06	1.19231e+06	1.04005e+06	1.07105e+06	992162	973193	1.04894e+06	968951	912679	795131	755084	852304	302319	473078	313950	341606	402264	616785	649861	843171	578889	678202	857383	559776	855732	612395	658278
RPLC-pos	1.298	Nicotinamide	HMDB0001406	936	C00153	C6 H6 N2 O	122.048	9	9	8.27381e+06	8.27642e+06	1.04841e+07	8.92526e+06	1.07728e+07	6.68998e+06	7.27359e+06	7.9761e+06	6.82669e+06	6.57028e+06	5.94163e+06	5.14722e+06	5.9823e+06	5.70857e+06	5.64808e+06	1.27558e+06	1.39381e+06	1.36783e+06	1.32115e+06	1.29533e+06	1.39273e+06	1.13718e+06	1.10601e+06	1.29382e+06	1.46962e+06	151047	260441	153003	347582	213687	5.39711e+06	5.1832e+06	5.84363e+06	5.8141e+06	5.32431e+06	6.6647e+06	4.75959e+06	5.71922e+06	5.12842e+06	5.42309e+06
RPLC-pos	1.297	Nicotinamide adenine dinucleotide (NAD+)	HMDB0000902	5893	C00003	C21 H27 N7 O14 P2	331.555	15	15	146247	129597	139225	150427	152960	24507.8	28228.5	35985.9	35740.5	24062.1	13327.4	18928.6	31815.3	31237.5	19205.5	29740.5	25089.6	34800.4	29046.1	40120.3	44451.6	50194.5	53095.8	46239.4	52293.1	46468.2	53824.1	49471.5	48063.3	44915.2	69531.5	53124.7	49383.7	75560.1	66587.2	71727.2	57479.4	78334.1	59170.4	55532.4
RPLC-pos	1.139	Nicotinic acid mononucleotide	HMDB0001132	53477721	C01185	C11 H14 N O9 P	335.041	9	8	9831.87	8645.61	9213.23	9847.67	9673.94	7570.56	8407.44	7679.66	7616.61	6559.89	9140.54	5684.31	9072.88	9338.15	6833.3	58025.4	63878	59802.2	62576.3	50563	54934.3	52514.4	56765.4	59821.9	46078.3	217801	212686	202493	218446	212330	56700.8	57395.8	55991.2	65781.8	57815.2	64495.8	61070.2	69657.4	54067.1	61503
RPLC-pos	1.289	N-α-L-Acetyl-arginine	HMDB0004620	67427	NA	C8 H16 N4 O3	216.123	17	15	2.25799e+06	2.36092e+06	2.60634e+06	2.72712e+06	2.7423e+06	1.17042e+06	1.36604e+06	1.47027e+06	1.16244e+06	1.21754e+06	1.1112e+06	1.0911e+06	1.30801e+06	1.31918e+06	1.31775e+06	780943	896709	778543	923194	726286	1.22568e+06	1.19279e+06	1.1072e+06	1.03674e+06	1.01348e+06	354888	385672	348368	398898	367274	1.10452e+06	1.14299e+06	1.15783e+06	1.13457e+06	1.14687e+06	1.54463e+06	976077	1.0492e+06	974046	1.11732e+06
RPLC-pos	1.28	Pipecolic acid	HMDB0000070	849	C00408	C6 H11 N O2	129.079	7	7	1.2674e+07	1.25043e+07	1.36934e+07	1.50961e+07	1.42433e+07	1.36293e+07	1.48817e+07	1.41349e+07	1.37877e+07	1.37226e+07	1.53598e+07	1.70371e+07	1.70864e+07	1.77239e+07	1.82193e+07	5.36713e+06	7.09499e+06	5.91487e+06	6.31371e+06	5.57575e+06	4.11484e+06	3.87172e+06	3.97896e+06	4.05223e+06	4.5156e+06	2.58095e+06	2.67761e+06	2.47834e+06	2.66192e+06	2.45756e+06	1.12905e+07	1.3077e+07	1.25971e+07	1.23513e+07	1.16388e+07	1.31599e+07	1.15043e+07	1.29667e+07	1.18249e+07	1.33764e+07
RPLC-pos	1.04	Proline	HMDB0000162	145742	C00148	C5 H9 N O2	115.064	5	5	2.86601e+08	2.77651e+08	2.79027e+08	2.84889e+08	2.79606e+08	1.94868e+08	2.27615e+08	2.13082e+08	2.14121e+08	2.32227e+08	2.98673e+07	3.23185e+07	3.43183e+07	2.99447e+07	3.13514e+07	1.21149e+07	1.45857e+07	1.16887e+07	1.17606e+07	1.31249e+07	1.48163e+07	1.44145e+07	1.4962e+07	1.28947e+07	1.4969e+07	1.15658e+07	1.25707e+07	1.20589e+07	1.21063e+07	1.28533e+07	1.57162e+08	1.62676e+08	1.61872e+08	1.53929e+08	1.55703e+08	1.71445e+08	1.42917e+08	1.59737e+08	1.67828e+08	1.52007e+08
RPLC-pos	11.669	Prostaglandin F2α 1,9-lactone	NA	NA	NA	C20 H32 O4	353.257	16	11	334150	316717	361670	432949	386198	566200	668388	679419	707449	725821	273346	317856	372955	328122	338498	218923	250616	253001	247412	251085	346342	300125	321647	328012	362147	65640.3	87287.7	83155.5	98087	86139.7	429889	466989	463226	464474	478560	624601	470234	435202	483312	456323
RPLC-pos	0.907	S-Adenosylmethionine	HMDB0001185	16757548	C00019	C15 H22 N6 O5 S	398.137	7	6	1.81199e+06	2.0141e+06	2.20323e+06	2.13787e+06	1.95553e+06	1.86995e+06	1.87498e+06	1.90634e+06	1.74256e+06	2.01673e+06	3.65203e+06	3.66135e+06	3.70348e+06	4.22663e+06	3.88668e+06	4.06328e+06	3.63722e+06	3.71941e+06	3.90314e+06	3.86068e+06	3.80754e+06	3.65301e+06	3.48803e+06	3.84451e+06	3.71159e+06	2.06645e+06	2.10133e+06	2.09428e+06	2.5358e+06	2.09594e+06	2.87315e+06	3.13086e+06	3.23188e+06	3.46363e+06	3.02585e+06	3.61419e+06	3.31785e+06	3.24494e+06	3.13059e+06	3.10541e+06
RPLC-pos	4.76	Valylproline	HMDB0029135	NA	NA	C10 H18 N2 O3	214.132	7	5	7.74574e+06	8.42768e+06	8.28252e+06	9.87195e+06	8.22749e+06	7.60014e+06	9.35248e+06	9.78075e+06	9.27637e+06	9.69393e+06	3.71541e+06	3.86501e+06	4.14887e+06	4.16623e+06	4.1863e+06	2.18251e+06	2.52724e+06	2.51944e+06	2.22431e+06	2.17843e+06	2.25064e+06	2.66396e+06	2.06113e+06	2.3034e+06	2.24106e+06	1.0705e+06	1.22434e+06	1.22791e+06	1.30708e+06	1.34821e+06	5.52835e+06	5.32894e+06	5.59827e+06	5.46642e+06	5.70326e+06	6.40029e+06	5.41083e+06	5.29494e+06	5.68988e+06	5.69458e+06
RPLC-pos	5.563	α-Aspartylphenylalanine	HMDB0000706	93078	NA	C13 H16 N2 O5	280.106	9	9	175756	154160	111094	190814	112869	226642	294214	307867	248203	277153	54110.6	59713.1	61834.6	83777.7	63660.4	74295.3	76233.4	76096.4	71239.6	76941.7	82392.9	94834.8	80342.2	73281.9	76853.2	45158.9	77236.2	58190.7	80680	60244.7	124876	141195	137190	139481	110277	151289	130866	122126	147054	128998
RPLC-pos	1.022	α-Lactose	HMDB0000186	84571	C00243	C12 H22 O11	342.117	12	12	9.75942e+06	1.00127e+07	5.66218e+06	5.93861e+06	8.50353e+06	9.802e+06	1.91743e+07	1.52155e+07	1.33477e+07	6.07747e+06	2.67483e+07	2.53798e+07	2.56947e+07	2.71069e+07	2.53697e+07	3.06888e+07	3.01366e+07	2.96928e+07	2.89622e+07	2.8418e+07	3.1855e+07	2.93811e+07	3.03792e+07	2.87692e+07	2.94544e+07	2.86827e+07	2.88306e+07	2.84062e+07	2.85495e+07	2.70486e+07	2.12519e+07	2.04304e+07	2.32609e+07	2.11118e+07	2.50765e+07	1.95485e+07	1.82912e+07	2.67522e+07	2.4172e+07	1.94223e+07
RPLC-pos	1.126	β-Nicotinamide mononucleotide	HMDB0000229	14180	C00455	C11 H15 N2 O8 P	334.057	5	5	1.04154e+06	1.02314e+06	621449	1.11012e+06	785892	1.14158e+06	1.28158e+06	1.13668e+06	1.2184e+06	1.20132e+06	1.01182e+06	923395	1.00895e+06	1.11171e+06	1.07981e+06	1.09174e+06	1.16614e+06	1.18258e+06	1.16371e+06	1.13632e+06	1.05581e+06	1.13561e+06	1.07976e+06	1.16275e+06	1.17941e+06	603406	600487	570201	574100	567313	1.21379e+06	1.28417e+06	1.24196e+06	1.21777e+06	1.34271e+06	1.34482e+06	1.24283e+06	1.21782e+06	1.16173e+06	1.31654e+06
RPLC-neg	7.703	(15Z)-9,12,13-Trihydroxy-15-octadecenoic acid	NA	NA	NA	C18 H34 O5	330.24	24	18	19215.7	19805	24629.5	26911.2	26292.3	23997.3	37425.3	41215.9	44992.4	51216.3	14750.4	15874.9	27963.6	30299.8	30245.1	14360.6	25215.6	64977.2	41426.6	12705.1	9746.15	7758.61	7406.31	9514.89	13247.6	4117.82	5169.2	3776.76	8007.05	5001.33	43076.8	25908.4	27200.5	27527.4	25663.6	37496.6	26544.3	27613.8	31597.8	30038.2
RPLC-neg	15.349	11(Z),14(Z)-Eicosadienoic acid	NA	NA	C16525	C20 H36 O2	308.271	27	17	35609.3	45834.6	47894.9	45279.1	46007.1	47446	63675.7	69510.4	65224.5	76106.9	38873.2	36351.6	30433.1	42925.4	49499.6	18982.5	20229.5	19338.7	23495	26378	24159	28731.2	26493.2	38112.2	42137.3	17771.8	21347.5	18727.2	20373.2	20815.6	48477.3	39697.8	44138.3	38749.4	62970.1	36946.2	37310.1	45613.2	44737.2	43020.3
RPLC-neg	11.048	11,12-Epoxy-(5Z,8Z,11Z)-icosatrienoic acid	NA	NA	C14770	C20 H32 O3	320.235	10	9	201979	225420	278121	298546	278576	612529	789785	804395	784455	791362	519938	389512	396968	554618	568160	373756	458113	397353	400470	380657	542266	495802	468438	566286	453981	158508	226153	202042	245344	212017	664109	532264	509071	504135	519013	597029	532143	481487	592849	548184
RPLC-neg	16.465	14(Z)-Eicosenoic acid	NA	NA	NA	C20 H38 O2	310.287	24	15	48477.7	59757	59248.8	56101.2	64066.6	53832.8	61458.6	73809.3	63245.4	86499	16347.2	24962.8	17640.7	27271.8	32838.1	38110	40224	40180.2	42600	48767.7	50390	51878	52511.8	69608.5	60240.1	26533.1	37723.4	34452.1	33712.5	39350.5	62781.9	64740.6	64596.6	63915.5	57771.9	41105.6	46946.9	61296.2	61673.5	60280.9
RPLC-neg	4.953	2-(Acetylamino)hexanoic acid	NA	NA	NA	C8 H15 N O3	173.104	20	15	53933.4	49650.3	48469.4	55340.6	49092	74459	85049.7	92713.2	86281.1	78321	42463.4	42301.8	41038.1	45301.8	47957.9	33932.8	44876	44479.8	42570.8	37704.7	46609.6	45927.8	46762.5	45482.1	47683.8	16692.9	16635.5	9544.79	16260.6	14411.8	68614.8	45150.8	42119.8	54095.4	52101.6	69934.2	56775.4	56475	55482.9	52186.6
RPLC-neg	6.178	2,4-Dinitrophenol	NA	NA	C02496	C6 H4 N2 O5	184.011	36	31	19021.8	19739	35243	15751.9	38977.9	27474	15965	17955.8	11556.2	33201.5	31790.9	13448.9	26526.1	17580.3	18592.4	31839.5	32504.6	42609.3	45544.1	21336.4	22315.2	25752.4	21407.9	22918.3	23268.2	19683.8	20596.8	26007.5	23882.4	27791.1	42791.8	22619.8	33763.5	18175.2	18435.1	45142.8	26820.3	37292.9	26608.6	23138
RPLC-neg	2.684	2-Hydroxycaproic acid	HMDB0001624	99824	NA	C6 H12 O3	132.077	18	18	423461	462000	473311	523975	420007	580075	609748	618617	615026	650555	389687	345421	408202	425726	428887	151873	194041	182230	178538	178332	153085	126771	143349	152205	160342	14182.3	21226.2	16312.9	19892.6	14820.5	437163	323031	318665	472350	334032	483782	388180	514950	362753	364503
RPLC-neg	1.295	2-Hydroxyvaleric acid	HMDB0001863	98009	NA	C5 H10 O3	118.062	12	12	1.08518e+06	1.13119e+06	1.28384e+06	1.38703e+06	1.23165e+06	1.37902e+06	1.52759e+06	1.59444e+06	1.4534e+06	1.53826e+06	1.18947e+06	1.33914e+06	1.2626e+06	1.27284e+06	1.35906e+06	292007	30444.6	310294	362720	316704	234276	237517	206566	219346	30417.6	49026.8	66526.7	47266.5	52248.3	53455.1	1.13651e+06	898175	1.01235e+06	878570	913540	1.29835e+06	1.01815e+06	1.01187e+06	1.06804e+06	970035
RPLC-neg	7.916	3-Methylhippuric acid	NA	NA	NA	C10 H11 N O3	193.073	15	15	23963.8	24103.1	26510.9	28171.2	23236.7	156457	186631	176649	163877	170617	101335	86568.6	91865.8	95767.5	93662.3	184198	208721	201209	186041	178123	173973	169287	166481	162649	172358	629404	690698	623782	689562	618000	304797	214320	222445	229351	211302	326464	231746	244996	251837	236406
RPLC-neg	0.757	3-Phosphoglyceric acid	HMDB0000807	724	C00597	C3 H7 O7 P	185.992	10	9	254290	274450	296439	284148	264930	117083	126657	139808	101526	135762	337474	373325	300467	325662	318390	240224	280342	276171	242001	283281	405890	345664	324714	319279	344308	208801	268253	223184	276188	226372	302728	250603	239694	243247	238772	300848	230712	247086	257575	260971
RPLC-neg	13.21	5,9,12-Octadecatrienoicacid	NA	NA	NA	C18 H30 O2	278.225	5	5	1.53356e+06	1.61261e+06	1.81575e+06	1.75405e+06	1.61809e+06	4.24576e+06	5.05284e+06	4.82304e+06	4.84627e+06	5.06546e+06	2.72602e+06	2.49328e+06	2.49296e+06	2.59146e+06	2.75045e+06	1.42956e+06	1.60679e+06	1.36649e+06	1.41896e+06	1.35974e+06	1.40115e+06	1.3977e+06	1.1801e+06	1.5201e+06	1.40374e+06	821817	1.01555e+06	932449	1.0183e+06	909463	2.92692e+06	2.52324e+06	2.61894e+06	2.69673e+06	2.6439e+06	2.95982e+06	2.66137e+06	2.76237e+06	2.75655e+06	2.62822e+06
RPLC-neg	14.473	8Z,11Z,14Z-Eicosatrienoic acid	HMDB0002925	5280581	C03242	C20 H34 O2	306.255	11	4	503609	598406	618509	543161	569321	610398	794320	692879	713463	767441	379706	363541	345063	402145	393029	169900	212166	177870	200279	195381	228732	250891	225172	258619	253242	125828	141373	122074	148759	130175	511033	507060	459911	478638	449261	454916	467998	468959	477465	492346
RPLC-neg	4.64	Adenosine 3'5'-cyclic monophosphate	NA	NA	NA	C10 H12 N5 O6 P	329.052	25	24	36138.1	40220.2	31967.3	55917.3	46655.4	28625.8	42891.7	45699.1	51570.4	36377.9	17470.9	17474.4	20712.3	20084	27482	24042.6	26490.1	34752.7	25559.1	14723	30275	42324.7	43893	42305.3	37832.4	68317.9	59325.6	64669.5	75238	62554	67402.5	51999.8	47990.3	24567.1	61214.1	68705.7	59231.7	52808.4	42060.5	46899.9
RPLC-neg	13.775	Arachidonic acid	HMDB0001043	444899	C00219	C20 H32 O2	304.24	6	4	3.22906e+06	3.55702e+06	3.56551e+06	3.87148e+06	3.36372e+06	6.97868e+06	8.68006e+06	7.96198e+06	7.68075e+06	8.4895e+06	4.47911e+06	4.47864e+06	3.87164e+06	4.43809e+06	4.63508e+06	3.91879e+06	4.35872e+06	3.89101e+06	4.36684e+06	4.13368e+06	5.4044e+06	5.71483e+06	4.9306e+06	6.01745e+06	5.93243e+06	2.72301e+06	2.93337e+06	2.63346e+06	3.12304e+06	2.74414e+06	6.1794e+06	5.92267e+06	5.96636e+06	6.00997e+06	5.70264e+06	6.0851e+06	5.84991e+06	5.79478e+06	6.45043e+06	5.79968e+06
RPLC-neg	13.646	cis-7-Hexadecenoic acid	NA	NA	NA	C16 H30 O2	254.224	16	16	283853	327538	343760	303052	292051	346144	479606	484994	345406	464844	307137	284214	295454	299902	280776	309705	324150	282528	298049	278650	347214	316360	302981	295633	325262	341583	323479	285183	327084	289926	447929	368926	283042	351471	323862	310441	470238	373383	332149	331111
RPLC-neg	0.775	Citric acid	HMDB0000094	311	C00158	C6 H8 O7	192.026	11	10	403427	402432	395109	439481	401097	684611	572875	704421	639395	595129	2.14338e+06	2.04292e+06	2.08302e+06	2.08709e+06	2.12848e+06	2.19332e+06	2.94103e+06	2.21757e+06	2.44467e+06	2.63286e+06	3.97999e+06	3.8229e+06	3.45766e+06	3.77307e+06	3.8116e+06	973293	927773	990979	998548	914790	2.03487e+06	1.70367e+06	1.7054e+06	1.76116e+06	1.51541e+06	2.08115e+06	1.60064e+06	1.57827e+06	1.89875e+06	1.77879e+06
RPLC-neg	4.876	D(+)-Phenyllactic acid	NA	NA	C05607	C9 H10 O3	166.062	19	11	313773	292553	328551	361778	329109	292702	360415	380970	366281	350116	81657	82498.9	96070.7	99443.8	95361.9	41940.7	44402.9	45080.8	44151.7	40165.9	39130.3	39947.7	40689.2	39303.7	40951.9	9214.94	10389.9	9860.01	11534.5	10333.1	202766	151738	155600	156986	156393	210545	175683	167795	171494	164646
RPLC-neg	0.769	D-Erythrose 4-phosphate	HMDB01321	NA	C00279	C4 H9 O7 P	200.008	18	18	145348	151813	170763	157904	148709	164009	154477	162673	157563	153339	131705	122608	126824	134460	110712	70879.5	68855.8	66538	67286	66389.8	45342.2	44488.2	39710	34728.9	43168.5	20467.8	22568.7	21086.2	20344.8	17918.1	131003	82386.1	92938	107786	90219.7	128964	70416.9	101400	97555.4	114517
RPLC-neg	0.802	DL-Malic acid	HMDB0000744	525	C00711	C4 H6 O5	134.02	10	9	1.96904e+07	1.82761e+07	1.8456e+07	1.92264e+07	1.66674e+07	1.98451e+07	2.01732e+07	2.07103e+07	1.90065e+07	2.05544e+07	9.20562e+06	7.78177e+06	9.00558e+06	8.67321e+06	8.58443e+06	4.23167e+06	5.15027e+06	4.37323e+06	4.60768e+06	4.44053e+06	3.29522e+06	2.91847e+06	3.13098e+06	2.9746e+06	2.94929e+06	1.31772e+06	1.41272e+06	1.20644e+06	1.34155e+06	1.11693e+06	1.11662e+07	9.40571e+06	9.30734e+06	9.74826e+06	9.16465e+06	1.21829e+07	9.65252e+06	1.00426e+07	1.01124e+07	9.84568e+06
RPLC-neg	1.405	DL-β-Leucine	NA	NA	C02486	C6 H13 N O2	131.093	19	17	8.55778e+06	8.74548e+06	9.72582e+06	8.54927e+06	7.91135e+06	1.18727e+07	1.57658e+07	1.42869e+07	1.4472e+07	1.51786e+07	5.8882e+06	6.28535e+06	9.2115e+06	4.93275e+06	5.69836e+06	6.08484e+06	5.81896e+06	5.27428e+06	5.11871e+06	5.24714e+06	5.90547e+06	7.05514e+06	4.15952e+06	4.69901e+06	4.29618e+06	3.50423e+06	4.30631e+06	3.4727e+06	3.13989e+06	2.14917e+06	9.25652e+06	8.42259e+06	7.11493e+06	7.06926e+06	6.80788e+06	1.16614e+07	8.29586e+06	7.90777e+06	9.13124e+06	7.78826e+06
RPLC-neg	0.837	D-Ribose-1-phosphate	HMDB0001489	439236	C00620	C5 H11 O8 P	230.018	5	5	194992	203256	217182	220992	183796	217630	229435	220020	222162	235325	273439	261106	265884	261717	244984	171926	176885	181195	178406	165892	168164	169969	152833	152662	162973	88739	101589	85230.6	99084.3	89556.8	213555	204042	208144	223677	211722	227533	197145	203511	229722	216925
RPLC-neg	14.756	Ethyl myristate	HMDB0034153	31283	NA	C16 H32 O2	256.24	12	10	1.73828e+07	1.83652e+07	1.98408e+07	1.85975e+07	1.91692e+07	1.90168e+07	2.32727e+07	2.3211e+07	2.04809e+07	2.35177e+07	1.61561e+07	1.48294e+07	1.61252e+07	1.74276e+07	1.7042e+07	1.23047e+07	1.11336e+07	1.28145e+07	1.16193e+07	1.18763e+07	1.3419e+07	1.23012e+07	1.23335e+07	1.31306e+07	1.35893e+07	1.06189e+07	1.22648e+07	1.30969e+07	1.30941e+07	1.31328e+07	1.93336e+07	1.63316e+07	1.87247e+07	1.54436e+07	1.63989e+07	1.85831e+07	1.62713e+07	2.07619e+07	1.54624e+07	1.6325e+07
RPLC-neg	1.313	gamma-Glutamyl-gamma-aminobutyraldehyde	NA	NA	C15700	C9 H16 N2 O4	216.11	14	13	309246	327945	334502	364036	314460	203508	262965	263309	229324	237846	89694.7	113894	104389	104949	90559.1	68912.1	67090.2	70085.5	61034.1	67580.3	91083.1	104083	79189.4	75591.9	72777.3	36349.7	48835.5	38100.5	40095.9	32982.1	193833	149237	156499	156912	139394	217278	155259	168045	176304	163860
RPLC-neg	1.286	gamma-Glutamyl-gamma-aminobutyraye	NA	NA	NA	C9 H16 N2 O5	232.105	20	18	162216	67180.1	182711	184180	169992	95359.4	120952	106771	88146.2	98288.1	25289.7	30471.2	27468.5	20787	22492.7	14649.6	17557.9	11198.6	13600.3	14515.4	24231	18259.7	14635.1	15416.5	15147.7	8928.04	9879.61	8086.48	8495.18	7515.4	67070.5	50446.6	52617.5	51158.7	46321.2	64683.6	51108.9	69226.8	70730.2	42489
RPLC-neg	0.761	gamma-L-Glutamyl-L-glutamicacid	NA	NA	NA	C10 H16 N2 O7	276.096	18	17	40804.5	33053	41529.5	44365.5	35688.9	27928.8	31433.6	37549.4	35011.1	38699.3	4026.02	12496.8	8326.85	8351.12	8997.7	9048.2	15420	11275.5	7868.85	9921.38	7286.37	7698.78	8511.18	9007.62	9247.37	5763.64	8477.31	6849.86	5215.16	6264.41	21442.5	19990.1	19202.8	19973.9	14151.3	21556.9	18076	13270.9	15229.2	23135.5
RPLC-neg	0.797	L-(+)-Tartaric acid	HMDB0000956	444305	C00898	C4 H6 O6	150.015	8	8	1.00843e+07	1.05401e+07	1.10504e+07	1.10519e+07	9.81446e+06	1.8119e+07	2.00733e+07	2.10725e+07	1.82042e+07	1.93245e+07	1.27054e+07	1.19055e+07	1.24613e+07	1.19471e+07	1.17573e+07	8.16242e+06	9.29946e+06	8.3898e+06	7.95137e+06	7.90927e+06	7.23546e+06	6.537e+06	6.57623e+06	6.4034e+06	6.11612e+06	1.55978e+07	1.68146e+07	1.54881e+07	1.59798e+07	1.49572e+07	1.54298e+07	1.2598e+07	1.28333e+07	1.37217e+07	1.28655e+07	1.63155e+07	1.33178e+07	1.34132e+07	1.38673e+07	1.35987e+07
RPLC-neg	11.356	Lauric acid	HMDB0000638	3893	C02679	C12 H24 O2	200.177	15	15	536567	501500	582667	629455	614497	486040	660499	743247	497056	688559	675576	652212	672553	650041	649945	643663	531465	749404	500197	567024	596108	549452	565160	662906	662685	576288	644083	630184	652719	657815	786652	643418	701162	513278	557479	789985	648758	757474	540899	607996
RPLC-neg	14.017	Linoleic acid	HMDB0000673	5280450	C01595	C18 H32 O2	280.24	9	8	1.95736e+06	2.25656e+06	2.24452e+06	2.39503e+06	2.16393e+06	4.53465e+06	5.70999e+06	5.65653e+06	4.7188e+06	5.66426e+06	4.66576e+06	3.5149e+06	3.81397e+06	4.69286e+06	4.38299e+06	2.22464e+06	2.2373e+06	2.60398e+06	2.04705e+06	2.2385e+06	2.57462e+06	2.2384e+06	2.17561e+06	2.80914e+06	2.85518e+06	2.00527e+06	2.43749e+06	2.21462e+06	2.38589e+06	2.2955e+06	4.03084e+06	3.48132e+06	3.92893e+06	3.24715e+06	3.43472e+06	3.94979e+06	3.49243e+06	3.79596e+06	3.43919e+06	3.42487e+06
RPLC-neg	13.124	Myristic acid	HMDB0000806	11005	C06424	C14 H28 O2	228.208	4	3	2.33443e+06	2.89371e+06	2.81987e+06	2.98413e+06	2.64819e+06	2.23015e+06	2.96871e+06	2.80859e+06	2.65413e+06	2.75721e+06	1.46866e+06	1.54529e+06	1.71516e+06	1.69484e+06	1.63492e+06	1.08258e+06	1.06876e+06	1.17607e+06	902757	965379	1.28532e+06	1.1509e+06	1.13719e+06	1.18665e+06	1.27746e+06	1.13147e+06	1.26206e+06	1.25097e+06	1.31281e+06	1.32786e+06	2.08476e+06	1.93444e+06	1.94458e+06	1.93362e+06	1.96196e+06	2.09649e+06	1.92544e+06	1.98219e+06	2.0858e+06	1.91927e+06
RPLC-neg	5.438	N-Acetyl-L-phenylalanine	HMDB0000512	74839	C03519	C11 H13 N O3	207.089	12	9	30511.1	28186.5	29432.3	30832.7	30268.7	14972.5	15634.8	17264.1	15728.2	15421.5	6546.05	7275.33	7945.94	7275.85	7245.37	6505.32	8213.41	8098.69	6607.12	6805.25	8380.64	7667.73	8389.65	7937.03	7894.51	13254.6	13465.9	13297.4	13314.1	13772.6	16688.5	14133	14621.3	15524.9	15281.1	19263.4	17333.4	15532.5	15746.1	14758.8
RPLC-neg	11.065	Oleoyl-L-α-lysophosphatidic acid	NA	NA	NA	C21 H41 O7 P	436.259	28	13	21454.3	14987.8	29212.1	20108.4	18377.7	16586.1	14740	14987.8	14725.6	21215.7	33982.2	26099.2	41979.2	22099.1	30844.8	64824.3	70117	67959.9	80542.5	62717.4	66625.6	52195.7	62706.4	86556.7	76134	32185.7	37208.1	41400.7	43555.5	47636.9	49240	54579.4	57228	52740.1	39250.4	60266.6	38432.7	56987.7	51813.9	51203.1
RPLC-neg	4.657	Pantetheine4'-phosphate	HMDB01416	NA	C01134	C11 H23 N2 O7 P S	358.096	36	23	10689.9	8264.36	10603.4	16530.2	13834.5	60064.2	82151.8	92923.3	110027	87233.9	65130.5	113521	86844.9	115505	119239	71869.2	110958	145219	124791	100540	19838	20321.5	25608.1	15825.9	32233.6	46180	55510.7	66435.2	88754.9	80183.2	69522.2	50877.7	40245.1	39678	42109.8	75857.7	60867.6	45756.2	45043.8	52608.2
RPLC-neg	1.307	Pantothenic acid	HMDB00210	NA	C00864	C9 H17 N O5	219.11	11	11	462785	488270	493545	482754	497271	301160	298044	282522	286197	311469	589602	581765	598670	613649	574948	523542	568634	491239	547631	608865	504649	459260	421025	423756	419410	242724	263203	192993	203651	202747	563975	443507	502160	553624	485796	659579	483720	514119	569719	525103
RPLC-neg	13.969	Pentadecanoic acid （internal standard）	HMDB0000826	13849	C16537	C15 H30 O2	242.224	9	9	650575	600350	721863	615407	755139	570406	806602	727723	514616	877679	536049	465886	500223	543189	551205	509178	401848	413852	462108	394930	552553	485249	454316	490406	664164	526196	525227	582746	575358	550463	690383	571540	667221	511514	599832	677962	618465	672924	593630	587749
RPLC-neg	1.299	S-Lactoylglutathione	HMDB0001066	440018	C03451	C13 H21 N3 O8 S	379.105	14	13	3954.52	2685.54	2644.91	3168.56	2766.33	8667.78	9320.84	7369.55	11825.4	12392.3	50382.6	120680	90113.7	101257	94219.5	62220	67641.2	95083.8	67400.5	102860	46638.5	55615.1	39665.7	38219.3	52490.4	9416.76	13525	8696.31	14401.7	8452.99	64690.1	56417.9	56328.4	69898.5	57013.2	66099.6	49513.8	56492.9	74241.7	65407.4
RPLC-neg	1.231	S-Methyl-5-thio-D-ribose1-phosphate	NA	NA	NA	C6 H13 O7 P S	260.011	11	10	43040.5	36901.6	41848.4	45998.5	45474.9	40108.5	49826.3	45607.2	44287.9	48359.7	159736	177144	178853	168018	172058	99620.9	108888	108958	126309	108761	108562	97713.4	97388.6	105905	115950	72922.5	69358.2	67731	68127	70153.7	135129	103827	115102	101490	103579	129971	104186	119067	119448	105342
RPLC-neg	16.321	Stearic acid	NA	NA	C01530	C18 H36 O2	284.272	24	19	4.72067e+06	4.56429e+06	5.12365e+06	4.54154e+06	4.89855e+06	3.10292e+06	4.78826e+06	6.26822e+06	3.50689e+06	5.65391e+06	4.23346e+06	3.87084e+06	4.24604e+06	5.15864e+06	5.83805e+06	2.90358e+06	2.31869e+06	3.67533e+06	2.84536e+06	3.19807e+06	2.81553e+06	2.2117e+06	2.7308e+06	2.87482e+06	3.57439e+06	1.88876e+06	2.56705e+06	2.79379e+06	2.6391e+06	3.04431e+06	4.47207e+06	3.17696e+06	4.99412e+06	2.95705e+06	3.57137e+06	3.2722e+06	3.05654e+06	4.61856e+06	3.04491e+06	3.90267e+06
RPLC-neg	0.812	Succinic semialdehyde	HMDB01259	NA	C00232	C4 H6 O3	102.03	20	17	451940	452392	469073	492130	407631	123642	128885	134163	126707	110208	33927.1	29809.6	30392.5	34209	27834.6	60515	61375.6	46695	47267.7	51237.2	64931.2	75556.8	49589.5	44822.1	46985.7	50378.5	17320.6	31596	27322.8	14857.9	187575	132478	138436	143162	127901	216638	145911	139081	164586	157194
RPLC-neg	4.566	trans-Cinnamic acid	HMDB0000930	444539	C00423	C9 H8 O2	148.051	17	14	71384.2	68176.3	72261.6	83034.4	65497.3	114674	150712	151320	134219	127785	60349.8	62400.8	67067.5	64019.4	62397.2	54497.7	70362.7	61319.1	60689.8	47966.7	52651.9	61638.2	60918.3	53451.8	55053.3	40457.8	41583	42332.1	54086.6	41136.3	90176.4	68985.9	71575.1	67955.3	73204.3	103828	75735.5	74969	77994.5	71832
RPLC-neg	1.021	Trehalose	HMDB0000975	7427	C01083	C12 H22 O11	342.116	9	7	1.03589e+06	900313	969935	993997	917369	1.52353e+06	1.63335e+06	1.50411e+06	1.40874e+06	1.47878e+06	1.94973e+06	1.9114e+06	1.87597e+06	1.99676e+06	2.06777e+06	2.20061e+06	2.21797e+06	2.33443e+06	2.19671e+06	2.18359e+06	2.43888e+06	2.10842e+06	2.15118e+06	2.05162e+06	2.28224e+06	1.71028e+06	1.68853e+06	1.50859e+06	1.60305e+06	1.49397e+06	1.60661e+06	1.62299e+06	1.64035e+06	1.71201e+06	1.72709e+06	1.96502e+06	1.6956e+06	1.72195e+06	1.83363e+06	1.60784e+06
RPLC-neg	12.695	Tretinoin	HMDB0002369	449171	C15493	C20 H28 O2	300.208	25	19	7923	5885.92	8723.87	8339.9	7552.14	8379	9862.28	42793.2	9305.7	16925.4	6266.77	5959.83	98897.3	7621.12	8136.82	5602.6	5860.68	5284.49	5265.31	6767	6622.37	6510.46	9717.68	7369.36	8265.5	4845.92	9276.35	6561.54	9638.88	6846.52	13378.2	8168.2	7754.07	8231.01	8561.18	10277.9	8223.21	8216.7	8287.93	11003.1
RPLC-neg	0.859	Uridine 5'-diphosphogalactose	HMDB0000302	18068	C00052	C15 H24 N2 O17 P2	566.055	8	7	649036	646486	657046	617372	564818	369928	375245	366626	311262	389937	179832	163495	174756	149853	153926	60063.8	54760.2	68513.3	59740.6	62817.2	53342.1	36856.5	36860	40580.9	53660.1	15220.7	8960.96	11506.3	8819.94	7135.83	174397	212147	201130	194177	185432	206223	168683	190130	195412	197800
RPLC-neg	0.743	UTP	HMDB00285	7058168	C00075	C9 H15 N2 O15 P3	483.968	28	25	2537.22	1963.92	3272.88	2453.78	2632.65	2333.75	2354.35	2974.08	2970.8	2841.92	2098.68	2110.78	2284.04	2218.02	2412.78	8688.14	10434.9	12670.8	3971.21	3834.3	7945.96	21724	29690	12191.7	11518.6	11930	31709	16475.6	28479.8	19667.8	8389.33	7428.33	4099.33	4543.39	4463.88	6312.06	7499.28	6770.22	4243.19	5792.45
RPLC-neg	0.727	α-D-Glucose-1,6-bisphosphate	HMDB0003514	82400	C01231	C6 H14 O12 P2	339.996	14	11	473205	558045	273851	410086	204575	75064.2	80961.2	88615.5	72364.4	85513.6	54466.7	47339.1	45634.1	61429.2	60640	14552.5	16740	20656.3	17451.5	14653.2	18820.9	14691.9	17133.2	17078	17362.5	14893	17140.2	13446.9	14948.5	11666.6	92823.6	71992.1	75407.4	80945.7	74406.8	99717	74528.8	70557.8	81552.1	78411.7
RPLC-neg	0.811	α-D-Mannose 1-phosphate	HMDB0006330	644175	C00636	C6 H13 O9 P	260.029	7	7	2.86056e+06	2.67719e+06	2.83138e+06	2.71289e+06	2.62204e+06	1.76708e+06	1.81422e+06	1.81778e+06	1.68164e+06	1.80394e+06	1.52603e+06	1.33585e+06	1.47704e+06	1.36878e+06	1.39198e+06	646916	719544	670676	622567	595249	665368	659018	612343	603515	569607	383723	425255	391845	413682	360669	1.49478e+06	1.30633e+06	1.2986e+06	1.41034e+06	1.28853e+06	1.61486e+06	1.33596e+06	1.32554e+06	1.35442e+06	1.36932e+06
RPLC-neg	0.886	β-D-Glucopyranuronic acid	NA	NA	C08350	C6 H10 O7	194.042	8	8	7527.25	11671.2	10895.7	16579	8678.27	14688.7	23569.9	15518.9	16949.1	13721.5	32740.2	35158	34861.6	40339.7	35502.1	2.01441e+06	1.92451e+06	2.18976e+06	2.05915e+06	1.70007e+06	2.18694e+06	2.44177e+06	2.04884e+06	2.2595e+06	2.4439e+06	1.5868e+07	1.82866e+07	1.63216e+07	1.82112e+07	1.58787e+07	3.92869e+06	3.90693e+06	3.97844e+06	3.73178e+06	3.66848e+06	4.74219e+06	3.88685e+06	3.37934e+06	4.05621e+06	3.97632e+06
RPLC-neg	0.856	Υ-Aminobutyric acid (GABA)	HMDB00112	NA	C00334	C4 H9 N O2	103.062	10	9	652875	600913	698060	585696	523770	364382	357194	352136	339719	372074	223483	214503	226739	215019	206758	215705	213372	217373	190610	195396	197320	189957	165459	162117	159258	180613	202057	178864	215180	186926	320838	334616	288912	316399	314650	380105	365451	280541	305517	340369
M_RPLC-POS	4.98	4-Pyridoxic acid	HMDB0000017	6723	C00847	C8H9NO4	182.044			219316	194440	922287	594805	205986	572421	474806	371726	496758	627743	122523	315673	355701	237626	410551	1018170	854217	876611	1139151	920467	969667	843798	890548	874003	1165894	9093868	10149448	9109377	10433266	9355775	2263427	2112059	2097917	2235618	2170040	2541955	2150049	2281086	2481764	2326722
M_RPLC-POS	0.8	Aconitic acid	HMDB0000072	643757	C00417	C6H6O6	173.008			17695696	3856337	5234926	4064065	3432938	15789619	16373346	16116628	15375542	15076546	40531176	35655848	38293096	33929368	34218204	39191572	45086020	41161444	42183464	39564236	58663416	52804276	54219400	57993548	52787084	15947879	15892475	14576066	15769386	14488843	36341588	28974998	38229816	29776526	30427400	35890972	29191466	28409942	30108828	30014564
M_RPLC-POS	4.99	Ala-Leu	HMDB0028691	NA	NA	C9H18N2O3	203.139			1852519680	1878865408	1991739520	2177286144	1861380608	2989256960	3628789504	3507033600	3345369088	3503009792	1041064512	1026912640	994909376	1140711168	1084657408	892920256	933417792	869713024	837949056	813848192	859608832	865957376	771596736	821460224	780291840	608355712	676626368	622463232	678840448	616130048	1635649408	1695572096	1768034816	1770535808	1743246080	1621104512	1434839808	1524869888	1673957120	1525455104
M_RPLC-POS	5.55	Asp-Phe	HMDB28760	NA	NA	C13H16N2O5	281.113			33925028	30732104	32693018	36644388	31198376	47417500	62151028	62624888	56072128	61472660	10694883	12651665	12789444	15310447	13336434	15771536	17214742	18232860	13818273	15459355	16641428	19123554	14564734	15109829	16017859	10677408	15256731	12656432	15675578	12175366	25195748	28339270	26079092	28176782	28532640	31464180	24134558	26074006	27664896	27249510
M_RPLC-POS	1.25	Cytidine	HMDB0000089	6175	C00475	C9H13N3O5	244.092			108379536	159784672	141386656	171855840	119828352	102410216	129659280	159343712	152743840	183361632	85089512	55620420	61510492	45297020	45335468	21360674	23948248	26072714	25395698	19067060	20747564	19286074	21228270	23584274	21181072	28809564	28693404	25881836	30527846	26931364	94351896	89424528	95609952	94341080	95156072	139664256	121468920	110219336	116512168	111603968
M_RPLC-POS	0.86	Epigallocatechin	HMDB0001871	72276	C09727	C15H14O7	305.069			25131384	31997802	37621472	32965110	29306202	29087134	33798224	37132416	29046602	39969436	34541220	26738876	35342036	32638902	35620644	23274732	24911594	21692264	25897678	24549054	30985604	28813948	30836158	30925530	30886570	33687724	33821804	37333644	32475618	35112704	32503810	37587168	37828640	38928300	37510504	48248676	41687364	43862512	49184788	48498724
M_RPLC-POS	1.05	gamma-Glutamyl-glutamine	HMDB0011738	150914	C05283	C10H17N3O6	276.119			100629200	86726152	82533440	85821648	86100816	82595688	95461176	95961104	92715688	92621888	35617364	45172952	42813744	40739072	41474632	32407928	33606656	30688828	27778144	33313508	32896942	35588824	28484634	29294438	33443042	17509788	20402642	18762842	22020796	18750908	62441056	66658088	60729108	62743372	67804656	61404120	71081880	61807152	65078432	64125352
M_RPLC-POS	0.96	Glucose	HMDB0000122	5793	C00031	C6H12O6	179.055			3490562304	3618280448	3700851456	3822728960	3392674816	3621595136	3959962880	3839083520	3805050880	3786774784	2561065472	2720943360	2704582656	2567488256	2496275712	2021561088	2263767808	1982613760	2134882176	1816259584	1946334080	1991214208	1937662464	2029015040	1775209216	1333793408	1396708480	1522573952	1392270720	1401706240	3043832576	2669010688	2888393984	2906200064	2764021760	3466566656	2840186624	3018860288	3130334976	2946679040
M_RPLC-POS	0.8	Glucose-1-phosphate	HMDB0001586	439165	C00103	C6H13O9P	259.022			595586048	552252992	590680000	567275840	527055104	349999136	375924224	380600160	344888096	370383968	299113888	270984480	292420224	276327904	275539648	126776624	142400336	130787160	126512168	114159952	127511440	128021232	124031728	118800424	109771304	82247200	88508720	81639368	88125152	77208784	311293888	271644096	273075264	291649952	271448096	332006400	271814848	277670784	282640000	286591904
M_RPLC-POS	0.94	Glutamine	HMDB0000641	5961	C00064	C5H10N2O3	147.077			8792089600	8831826944	9323532288	9620976640	9163984896	1907837952	2041012736	2051111296	2006215936	2118962176	3059056384	3061908992	3176251648	3205897472	3178888192	1589771904	1612866944	1624924928	1588277248	1521509632	1862017664	1834355968	1806820096	1822775424	1763717376	2128357504	2163911680	2129936128	2189964288	2142905088	3894326784	3863099136	4020747264	3979502080	4114810368	4430459392	4073447424	4109536256	4256499456	4072653568
M_RPLC-POS	1.29	Hypoxanthine	HMDB0000157	790	C00262	C5H4N4O	137.046			2915357	3482089	1632113	2601949	2238743	2059282	993804	1588177	1150408	375454	26191094	30359980	30906950	30976156	30188826	162796240	184546224	187038544	178199648	158815664	77434144	92483952	66889356	63233992	53915224	201788032	224325424	189135200	223623136	183739968	43570260	42444048	43045708	41467688	44553940	63988552	41035992	45498020	47074964	43769664
M_RPLC-POS	1.13	L-Ergothioneine	HMDB0003045	5351619	C05570	C9H15N3O2S	230.095			431000288	426210656	466113248	482798528	408504480	831179712	937191040	967260992	893121280	941199744	2058982528	2038971648	2125615232	2255585024	2198165760	1405930496	1580817920	1579541760	1493053824	1421926144	1266642048	1182654976	1173711616	1202162688	1192254464	1309003392	1392935808	1316019456	1402348416	1294331264	1473689472	1494882304	1484849664	1521518592	1510731264	1672386560	1387612160	1416801792	1429807360	1405428352
M_RPLC-POS	1.19	L-Histidine	HMDB0000177	6274	C00135	C6H9N3O2	156.077			224045040	229743728	246210048	248223520	215305232	300319648	340480064	357338656	328878048	344713472	206492400	216532032	217308064	239116896	234924512	65491560	243555968	191527568	209281312	63483592	69813440	64088968	56893912	59724144	68759456	65323656	70021568	64214176	68395464	60228532	301136992	266131824	302419072	303486656	335516032	317960672	279755168	293564896	289253760	302580128
M_RPLC-POS	1.02	Maltose	HMDB0000163	10991489	C00208	C12H22O11	343.124			19920704	19756298	29096874	17315546	26482322	46273212	49330556	43375324	48001120	44610440	50849516	54662352	54529232	60150284	55765204	55617260	54743040	58208120	52995048	51172112	54964424	55170696	49492428	54784332	59264820	38632168	41201848	41778484	38560404	41656572	42153412	38630884	41113936	40673144	50447280	40344624	43015676	44739024	47428772	44024888
M_RPLC-POS	1.3	Methyl-2-hydroxyisobutyric acid	NA	NA	NA	C5H10O3	117.054			374043104	384533056	414511680	470278368	413917472	442939616	502607488	540663808	494052544	515469216	354882784	391509152	409673120	410889696	427897056	104897528	166716320	171173584	176623824	179402544	102317688	90669400	97572544	92136848	104371512	22976672	24642718	28465244	37125680	33297584	386596704	304228416	319698144	305793376	309843360	426120704	351055296	366814432	380330400	359630560
M_RPLC-POS	1.01	N,N-Dimethylarginine	HMDB0001539	123831	C03626	C8H18N4O2	203.15			477696608	473472256	491087168	528036608	426404544	596012864	668974464	628046336	629958656	676867776	1678289408	1667790336	1733527040	1728195072	1683821056	2040822912	2240456704	2171542528	2026620800	1924576896	2270200832	2156444672	1972807552	2061494912	2040718080	2255819264	2420686080	2229029376	2378491648	2168496128	1889325952	1880178432	1911528576	1843140992	1919108608	1988698496	1709542912	1646909696	1744269312	1615527424
M_RPLC-POS	1.05	N-Acetylmannosamine	HMDB0001129	11096158	C00645	C8H15NO6	220.082			4260568	6048434	9518435	4868418	9648698	24208174	27608040	26491788	25380008	24683206	47947184	48818660	48941912	45773708	46525920	26513954	31002196	29278382	26949056	28339448	23826396	24881490	24721486	19952084	21439722	13144956	13693436	13591465	14528988	13350300	20547488	19214214	22304770	21938676	21604512	28121408	22152908	24439760	27319500	22860932
M_RPLC-POS	1.3	N-epsilon-Acetyllysine	HMDB0000206	92832	C02727	C8H16N2O3	189.124			1581879296	1502388864	1730366976	1571107200	1637845504	2218312448	2498259456	2259389184	2271962880	2215835904	1004703488	994464448	1063182208	978016256	1016028864	922189568	1087325056	1012636864	942853056	922547840	1356438784	1337205248	1194580608	1337368320	1259464320	525135616	581621760	511219904	583623552	489110496	1554284416	1723585152	1596022784	1745822720	1672877056	1849052032	1377648640	1620468480	1459351936	1438619904
M_RPLC-POS	1.29	Nicotinic acid	HMDB0001488	938	C00253	C6H5NO2	124.039			19805404	35392140	50467756	9621747	20775294	28443856	60311904	28305684	25756076	36322080	645922304	619844992	674993216	566001152	591553024	1743654784	2034628096	2073268224	2004309888	1849987328	1428788224	1144719232	1411448192	1074116480	1372621056	1187011456	1223944960	921938560	998285952	888533440	877381056	1172237696	916058752	1251818240	976442240	1147757696	894870464	1165830400	978307264	952244224
M_RPLC-POS	1.28	N-Methylproline	NA	NA	NA	C6H11NO2	130.086			3342178304	3388008960	3553158656	3803199744	3420777216	3416559104	3647840768	3861965568	3779924224	3901023744	4217109760	4406876672	4525146624	4764344320	5021548544	1780006272	2009272448	1992981888	1897730688	1859351680	1485325696	1432377600	1427896320	1347372032	1422051840	868762624	914969344	885853312	976120896	893787072	3104874496	3142552320	3178869504	3255081984	3336636928	3669208832	3050908672	3121960192	3231658752	3154177536
M_RPLC-POS	0.76	N-omega-Acetylhistamine	HMDB0013253	69602	C05135	C7H11N3O	154.098			152321696	162273824	181799520	180753136	159788864	149721168	177882944	194687120	176882480	186057392	70096520	70847608	74620840	74823520	76151424	21331348	23552120	19582888	20320800	18341566	17652050	14276881	15538655	17571686	15027442	5970804	6373108	6148239	7337578	5987599	117623744	124629000	119889384	128441552	123272104	146934144	114978776	133332176	139044128	129486496
M_RPLC-POS	6.25	Riboflavin	HMDB0000244	493570	C00255	C17H20N4O6	377.145			12022427	11846233	11710870	13199597	10768140	14456032	16529529	15292827	15889839	16829394	6021882	6532366	6885382	5553710	5966124	6540688	6835017	7543958	5728773	6287239	5913420	5302053	5660164	5749918	5618552	6828718	8121640	7402958	7447622	7592600	12043484	12022612	12013257	12144386	12010382	13372628	11077632	11208520	10693411	10791289
M_RPLC-POS	5.5	Tryptophan	HMDB0000929	6305	C00078	C11H12N2O2	205.097			1499640448	1393658240	1548495104	1607157120	1366543104	1591026560	1994488192	1913018880	1846181248	1933281024	1027015424	1181826304	1240416128	1153821184	1166039296	835347520	936839744	972553472	852646080	852266432	745859968	760832512	718331904	725938048	794571776	511589120	615163008	524526144	600849088	529073952	1296491904	1279060736	1275058048	1344433664	1391772288	1530121344	1286880384	1265272704	1310903296	1273437056
M_RPLC-POS	0.86	Uridine diphosphate glucose	HMDB0000286	53477679	C00029	C15H24N2O17P2	565.047			128270528	117736288	122650112	112731616	103995144	71839528	72809456	70451032	62017424	69619040	33362576	32288830	34353380	28008834	30410484	11919222	11511504	13606892	12347457	12409202	10642857	8175672	6696354	8748315	9620022	1402754	1906318	2301671	921632	1721025	39738484	44493696	43474392	41040440	39608812	40404284	35264196	37505984	37050712	37525140
M_RPLC-POS	0.87	Uridine-5-diphosphoacetylglucosamine	HMDB0000290	445675	C00043	C17H27N3O17P2	606.078			64895700	64264196	61986756	57329988	51192884	49492340	39497612	38252028	36797044	36311336	25117886	20240812	21524284	20112194	17540036	13974598	11769042	12936579	13985526	12023401	12252976	11366677	10228333	12807596	11052880	2604442	3792068	4115936	3013700	3766368	24986740	25887866	27298556	28192214	26900338	24004122	20959980	22040234	22932222	21278904
M_RPLC-POS	0.98	Xylitol	HMDB0002917	6912	C00379	C5H12O5	151.06			19397372	20093142	22189094	21483416	19961704	23036946	23342124	23995762	21751586	20413230	39113924	38953028	34731000	36373052	36774760	40509708	41381752	45876852	42783700	43219020	47835848	48857960	47279480	48628752	54572588	37995452	41657916	42381812	40514600	41237196	26786248	24962330	29368102	28159420	29166018	33636244	31167368	29522904	33951496	31693938
M_HILIC-pos	1.86	2-Amino-3-methoxybenzoic acid	HMDB60374	NA	NA	C8H9NO3	168.066			156370240	149048464	154657024	150822352	140441392	95961096	111615624	109961872	88919792	87722280	75153400	68605544	52821164	71413184	72195200	67068776	77545256	67789648	65754720	53313744	51459340	38939348	46994520	49082452	43178752	35955296	42687824	29466572	53496304	39723888	108542864	118484432	118160776	119716488	120823544	153747408	89909688	101532152	108045824	97655360
M_HILIC-pos	12.24	3-Hydroxyproline	NA	NA	NA	C5H9NO3	132.066			83000928	84338704	108011856	100747392	124024024	109968448	138355632	154649248	142760336	141304752	102684080	112169640	109902376	114269120	125509472	37374564	39946412	32811968	33110066	29582072	33322688	34424396	26736136	28494876	28395218	27474430	29706392	23177056	25782796	22809686	74534992	97994800	81623456	100169928	101513264	129571064	101655944	93574872	96479432	90098880
M_HILIC-pos	1.85	4-Hydroxymandelonitrile	NA	NA	C00650	C8H7NO2	150.056			52016324	51487108	53047888	54035212	50746732	33487686	40091944	40727360	33151340	35042172	31675286	24356490	20914206	31511532	34000924	26644832	25809198	27347616	26628578	21800570	19671082	17517506	15753305	21370972	17955022	15195761	17789050	10634528	23415090	14142567	32926476	37608940	39052604	40057580	36700100	54641136	32836764	38205248	40757800	38404776
M_HILIC-pos	1.44	4-Hydroxyquinoline	NA	NA	NA	C9H7NO	146.061			11624410	14013984	15369118	15560809	14039174	13869582	15767964	18051248	16425733	18164502	10166804	12085457	10678700	15165828	16082709	13904639	17376278	18781796	16823750	15273844	11945796	11952536	12520773	12416045	13526783	19964566	24383102	20262642	26019002	22748918	14065288	14434918	15892633	15482961	16382987	19747678	19641844	15124739	22143006	16673042
M_HILIC-pos	9.38	4-Methyl-5-thiazoleethanol	HMDB0032985	1136	C04294	C6H9NOS	144.048			42893592	41452260	46627748	47518768	46708000	69962072	78235448	76908272	75640896	79367320	84806552	83481968	86706656	92865472	96819392	85118520	99312840	87052000	86395152	88626488	87668384	88762200	80113840	83967904	84511880	99062184	99494488	93070560	104379688	101231200	82801856	86944216	88366752	84008280	86857976	113332528	85733968	83082120	91861680	86110960
M_HILIC-pos	2.96	6-Methyladenosine	HMDB0004044	102175	NA	C11H15N5O4	282.121			66873080	67146528	47920888	72928008	68744552	43623276	32873198	44403972	35618496	48604384	18262018	16489006	13996258	6917415	16070874	12736835	13800582	14163473	12259461	12289331	9985490	8597102	5354100	8304050	11035837	8208626	10173391	5993242	11935354	10552331	15170179	36740320	38601920	36261916	37658524	32016914	13793445	32734914	38495572	39675596
M_HILIC-pos	13.99	Acetohydroxamic acid	HMDB0014691	1990	C06808	C2H5NO2	76.0402			250728576	258173424	271715008	303596256	262369808	243817120	284473280	272036640	294054560	285881408	98830568	110440056	115465728	101448824	104195488	70847584	85917640	78947872	77418888	71011144	65551580	66878976	54313524	62056232	63823028	54301728	58984988	54717468	61109416	51563028	142351936	162503440	176387664	179152496	166995216	233796752	183691728	171976720	181330192	185740704
M_HILIC-pos	10.83	Acetyl-L-carnitine	HMDB0000201	439756	C02571	C9H18NO4	204.123			2298395648	1884792192	1846430336	2360209152	2011805184	1299348352	1279720576	1485256064	1533983360	1517900160	126796616	124272224	116207552	142623248	145539056	71485024	79666216	79850872	74745904	69971936	78470840	71811096	60298744	63154908	84330848	142243984	104352296	116261904	124714600	117033664	954131136	975015616	999331008	986047936	932587968	1163132416	920027200	932086592	940050432	952737344
M_HILIC-pos	16.44	Adenosine-3-monophosphate	HMDB0003540	41211	C01367	C10H14N5O7P	348.071			315920448	251217504	262650144	263896384	230277552	45400452	31988554	26892200	31019168	24740112	16480747	24381068	22329666	27398632	20060580	33173972	36321424	22659014	32368706	24256948	13337900	24945584	18299192	21224600	28011556	14020332	14677270	16894780	11013607	12537123	46568088	64902236	65534860	62192156	98941448	99817560	72951720	58105252	75064280	65147216
M_HILIC-pos	12.68	Ala-Val	HMDB0028700	NA	NA	C8H16N2O3	189.124			1953752192	1814543616	2021346304	2152315392	1599685760	2665416960	3330403072	3119439104	3260611328	3097207808	1438958464	1533895168	1494880256	1657607040	1392897024	1257230080	1399680768	1235568000	1049519552	947906240	1255518208	1288485888	1084240384	1038951296	1021993600	796422400	803350272	840342592	859832512	708943552	1691803392	1907345152	1954834176	1892364800	1939950464	2624336128	1901459200	1869066368	2075957248	1654286336
M_HILIC-pos	11.26	Albendazole	HMDB0014659	2082	C01779	C12H15N3O2S	266.095			4807874	5141460	5758612	6377284	6292402	20026288	22082030	20615162	22147434	22975962	76599920	64016352	62189152	80557816	81016040	100214336	111247304	81799760	86953128	83739872	76448776	62308840	60602320	87696616	84995912	182969376	133080720	151409760	172593648	149713056	71332624	73245160	55742252	70557744	51717472	68333280	52278792	52930324	52903872	53219476
M_HILIC-pos	15.49	alpha-Methylhistidine	NA	NA	NA	C7H11N3O2	170.093			14701144	9641343	9407436	9321741	11734979	10168447	18588242	14277657	15218442	12956965	47012724	38316352	19199600	54029792	49667412	31269474	80072488	90195448	96220464	86198688	67824928	59724596	48805712	132233448	110753112	76746216	28243746	30956370	38875936	40735316	15866554	19531272	21433022	50072120	17964878	17536490	17167336	17124336	17974148	19846226
M_HILIC-pos	15.05	Asparagine	HMDB0000168	6267	C00152	C4H8N2O3	133.061			2164279296	2157779200	2281055744	2366555648	2139771392	1577136384	1910750976	1815818752	1924877824	1982881536	1390306944	1341472896	1389786752	1464699264	1434522496	853742656	972459200	920068352	880082688	858794688	752311936	757035840	701179328	724148672	751404608	1232475392	1199463040	1186122240	1346115456	1174666496	1607398848	1663532160	1652542848	1681211264	1607107712	1682915200	1541816064	1540965248	1572713216	1565303680
M_HILIC-pos	18.73	Carnosine	HMDB0000033	439224	C00386	C9H14N4O3	227.114			185752720	195109936	220167552	228036384	202377936	407624192	447232448	426643200	445998304	454888928	76609680	212986384	246351520	203306272	205115616	27815142	95381704	25996816	39077228	83235080	29553460	104407632	29253136	85837064	88054240	29207990	64685404	28367534	63443940	55009464	122132392	144106208	141717280	135241648	161581184	173934832	226483888	235248432	219353184	241334832
M_HILIC-pos	17.14	gamma-Glutamyl-cysteine	HMDB0001049	123938	C00669	C8H14N2O5S	251.071			70504576	71846640	79402336	77609592	74682400	91912936	101275248	100066480	102995512	102201280	70229448	70770152	70665760	71644904	73287656	87816232	88547136	93342928	85041600	79331168	73170248	62597428	70006264	67267392	75920464	109416736	134101384	123324584	128520808	122094648	87496808	106050440	107007664	109976032	110015480	125228392	112381424	100482360	104407088	95783136
M_HILIC-pos	12.42	Gly-Ile	HMDB0028844	NA	NA	C8H16N2O3	189.124			251439824	230008096	215035152	191560208	170370064	335532672	409820992	347486880	295080576	284283296	209498256	273169344	268504576	255179520	252855840	201773104	187378608	206666416	166460672	186263952	219420640	198418336	187094368	214021872	251689744	98653808	109103720	99530464	102685024	106526720	348603136	226161968	234951728	230477232	220505952	396828928	204897936	197871360	171945376	164743216
M_HILIC-pos	14	Gly-Tyr	HMDB0028853	NA	NA	C11H14N2O4	239.103			27221570	29957958	29665894	38106712	32508076	46476800	54936696	51786700	61329980	63133820	20466838	23320332	21216318	22855200	22673564	19995206	21775548	20238412	19724296	19441652	20629082	19370478	15078918	19718716	19778730	10379522	11735298	12749616	13327086	11516808	28006318	26555170	28099786	28359326	26782410	34816860	27891610	26762904	26409162	26222070
M_HILIC-pos	13.33	Gly-Val	HMDB0028854	NA	NA	C7H14N2O3	175.108			893049344	797672064	819344640	878260928	831082240	951876288	1038213504	970738688	1014910400	939840384	630713472	675398528	680490688	702098240	715396160	596634432	655300352	587246144	661196352	603725440	561102848	231437120	411536768	546834688	556639936	410576576	479545760	490691744	454162240	458642176	788477248	904873984	889907328	911987776	881464640	1039388928	831622144	821254208	892205632	890715456
M_HILIC-pos	13.11	Hydroxyproline	HMDB0000725	5810	C01157	C5H9NO3	132.066			382046656	344134048	389552704	415169632	386859104	368906912	412571776	410439584	444547936	430946496	476966272	487369504	535628128	523872448	538175936	279859200	313667552	335425792	395750240	271521376	256711200	255873296	177761568	243607648	283600096	195294336	166535312	188415296	203010976	234724496	258651744	354230528	359240864	411133056	436821376	444875136	372484928	349797600	404062912	417461216
M_HILIC-pos	1.42	Isobutyric acid	HMDB0001873	6590	C02632	C4H8O2	89.0722			64945524	76412584	63781740	61586504	67733760	65854988	71208952	76253472	78015600	64394476	79509296	71560952	113963864	74739408	73311432	85253896	104406440	141963104	106864264	70500528	88136872	81839760	88994128	71879536	84963720	64458044	74814960	70887392	75672384	65946596	74167696	70180504	74220120	73864128	77688936	84491960	76148064	72111368	71920496	91456032
M_HILIC-pos	17.54	L-Aspartic acid	HMDB0000191	5960	C00049	C4H7NO4	134.045			367981728	375431136	381539904	435847808	374656128	333986080	419241472	376393888	412335328	400097920	1617905408	1752567040	1743759744	1736778112	1786571648	1267630080	1504818560	1392037376	1366381824	1286429824	1006951616	949525184	883159424	914482880	918800064	867439040	860272320	825866624	880874048	864465920	962807296	1071491904	1080155904	1064166592	1019337280	1376794880	1105216384	1061233792	1047809536	1076868224
M_HILIC-pos	14.79	L-Serine	HMDB0000187	5951	C00065	C3H7NO3	106.05			593944256	605309248	673123840	684795712	628619328	636362240	787172288	761567104	791703936	837741120	493757824	498168704	542537536	544939264	541280704	345160480	411330880	382649856	356212320	344244512	332507584	345206784	308634976	332524480	338927680	359114944	353139232	314965824	384440256	339328800	529959136	549895744	567530112	572916992	553659456	775997760	569199360	546344256	578280320	590167488
M_HILIC-pos	9.83	L-Valine	HMDB0000883	6287	C00183	C5H11NO2	118.087			162059370496	242087936000	165787648000	258385166336	175866003456	200731934720	199308902400	147745112064	214464299008	147111870464	146691653632	148489764864	152130682880	115749511168	119987273728	56182444032	62384156672	59652378624	61987565568	47524818944	36407705600	27715291136	25631805440	27668586496	28575393792	15119454208	16129764352	15312600064	16318430208	14724788224	159921831936	167350337536	172860801024	169795305472	166400950272	186358185984	172565626880	173937033216	134197977088	130837143552
M_HILIC-pos	14.62	Methioninesulfoxide	HMDB0002005	847	NA	C5H11NO3S	166.054			40120840	41202664	53700364	39485572	38030420	54679800	68796160	68984720	67554424	79461936	26575538	23223900	28745098	34357648	35759144	23639908	37201640	39767084	33267748	29649410	19286464	33610712	28666556	30047118	39183404	23815790	25163742	38638800	26991028	28144730	4200075	28426154	33226410	29238480	41035956	50167744	30145504	34754012	34504548	54913240
M_HILIC-pos	13.58	N,N-Dimethylformamide	HMDB0001888	6228	C03134	C3H7NO	74.0609			228930304	207894000	216479856	240346512	225185968	438079296	415003200	418211584	431595168	282034336	183307200	223563536	221789856	216358496	191093824	156260320	218131968	200483904	171805136	175428176	198259648	145386224	129318512	164795424	152537648	148317344	265053024	362495328	304720192	196173008	418338176	428756640	429226176	396399552	398194656	413481280	239256624	233054768	243573632	208195696
M_HILIC-pos	15.8	N-Methylhistidine	HMDB0000479	64969	C01152	C7H11N3O2	170.093			16418040	15261344	16431045	11963057	15152207	17831012	17577764	19692800	18234678	20944004	61710840	51859052	50595408	47706100	47200820	101357696	103340880	83083576	86893736	83450728	95151024	81422400	89201576	77435976	89282272	229174000	286696640	313624512	350351616	344483872	228951120	213929264	190069008	126271024	165150672	175258512	139235920	121187624	139506144	137939840
M_HILIC-pos	10.01	N-Methylvaline	NA	NA	NA	C6H13NO2	132.102			5800785920	5704928256	5817420288	6404201984	5526632960	6951008256	7750929408	7578229248	7731259904	7861914624	4296503296	4564104192	4603733504	4405605376	4496649728	3490178048	4122851328	3733346560	3450900480	3135902976	4259986432	4920242688	4039141632	3950454272	4053765632	2322566400	2843032576	2299357696	3003769600	2340722176	5485522944	5667484672	5908738560	5679781888	5450314240	6665038336	5610907648	5151092224	5555485184	5251086848
M_HILIC-pos	13.43	Octopine	METPA0471	NA	C04137	C9H18N4O4	247.14			310332544	272330816	278531296	318480416	267462656	58873484	66397684	79417240	61837968	59195184	96169216	144312656	138214672	105283424	102993784	193239936	187014768	200966384	182651104	195002208	110736192	91156856	46742956	97345848	116014496	2991498	5661426	3316656	4213306	4270684	127271832	167290928	175918720	172922784	167505680	182411360	149052112	150489728	157641632	156444352
M_HILIC-pos	14.4	O-Succinylhomoserine	METPA0134	NA	C01118	C8H13NO6	220.083			243878752	243232864	250852640	273455872	53437188	75422648	80544264	75987168	82425416	79714400	49274264	47504260	47050284	56584884	56816984	103232408	103413464	98855664	114902064	118543688	109612224	97585376	87982688	114707968	125621656	40557768	31253832	42152432	48212660	44442644	138234800	137303472	142526416	142123120	139928624	162578768	133858288	135604208	140020560	143792768
M_HILIC-pos	13.09	Phosphocholine	HMDB0001565	1014	C00588	C5H15NO4P	184.074			48994064	67733264	160838576	73410280	151019600	504773696	66946472	87051816	533731456	545933248	426135008	493702176	170007152	503957344	466707232	297230880	262502048	99178880	333679296	293878048	80609304	197134176	122758392	213868944	207799824	144480576	179370976	153562672	154004112	147218256	2585929	40805304	188270864	60571820	65730248	87013224	87536056	33184882	36606688	34127456
M_HILIC-pos	2.41	Pyridoxine	HMDB0000239	1054	C00314	C8H11NO3	170.082			56802276	57137364	56337648	61988116	56753200	59281960	66818464	64558568	63971304	65840912	43305176	44043240	42018540	43647380	43945388	43420228	49500200	46483480	42803692	39390804	36621756	33613816	27599692	32998418	32349810	87377776	89400704	77652312	100367408	93704272	53812436	59254316	61674440	61667820	62420212	76033072	58528548	57380676	61700084	60618540
M_HILIC-pos	13.11	Sarcosine	HMDB0000271	1088	C00213	C3H7NO2	90.0556			18346989568	17903581184	18319566848	19926806528	17884407808	10151083008	10752063488	10870881280	10893809664	10689137664	6120637440	6183769600	6313027072	6367870976	6732161536	5982358528	6487751680	6074381312	6388455936	5729809408	5065010688	4733282304	4152663552	4601761280	4690862080	2727041536	2887976704	2776692736	2841593600	2700010496	10025065472	11104154624	11241120768	11325917184	11352347648	13546090496	10729092096	10395101184	10917953536	10857725952
M_HILIC-pos	17.02	Targinine	HMDB0029416	132862	C03884	C7H16N4O2	189.135			156657856	150949120	153466976	165160864	162818544	170094928	187473040	190318368	198540640	186679872	295074752	314512160	305551104	325605376	320873184	340242496	372465152	356224032	345805824	331414304	351625248	336919328	343842048	339053312	327416928	351871168	374446208	343821888	379325504	346704928	321763968	346054368	336055072	310565152	334816064	424027008	317935552	307723136	320083680	313426080
M_HILIC-pos	13.62	Threonine	HMDB0000167	6288	C00188	C4H9NO3	120.066			1159370880	1092696064	1194952832	1384734848	1190556416	2104187264	2560109056	2547509760	2670403072	1977965568	831136384	886088384	923467648	890499904	935845056	764082880	911910976	838845760	848386496	804157312	654503808	642272512	536851488	684460288	685742016	648526912	1100577024	723046016	766572032	683829184	1544147584	1671779584	1735074176	1747193728	1693376384	1549053824	1141028352	1090213760	1199451776	1189418880
M_HILIC-pos	21.71	Uridine-5-diphosphoacetylgalactosamine	HMDB0000304	1167	C00203	C17H27N3O17P2	608.091			294962400	294118912	314719616	63241244	37424372	210423152	244473936	228651776	32495872	20453368	117696592	134946704	122378064	145410368	133294256	78272552	91333584	95655776	93816872	80591120	66335224	63524200	62338032	63852832	9289213	51600548	47911660	46528348	8409297	4970570	198043136	190199648	207950528	211573056	197858032	271415904	183249248	196232928	171555520	32718116
M_HILIC-pos	3.99	Urocanic acid	HMDB0000301	736715	C00785	C6H6N2O2	139.051			21446692	27488630	30761216	22678400	29514640	19032850	35355688	34952488	15157993	28596864	23444202	30337510	25851920	42885132	34577912	70841960	47441292	75060928	56852828	47871540	99526336	96205008	80256616	77748896	99141216	88626856	52832160	80400184	93733944	73872432	55962380	68471408	52056312	70415600	57511752	136492624	103993680	59505760	54879736	57304088
M_HILIC-neg	4.17	2-Hydroxy-4-methylpentanoic acid	HMDB0000665	92779	NA	C6H12O3	131.07			884504192	858730752	880084992	790026304	703300416	1075385984	1121456896	1224734208	936358720	1014399872	956639744	864488128	884025216	718223808	720569792	505499552	549774080	512861408	384407136	365520704	468138720	396435584	385478496	302386624	301644768	92951296	126427632	105518728	106493360	88887336	103780088	1032997056	1153802240	1148291840	1077465600	1066303616	798173696	657601728	651495040	607547776
M_HILIC-neg	15.49	3-Hydroxy-3-methylglutaric acid	HMDB0000355	1662	C03761	C6H10O5	161.044			274247264	282717888	308083040	326374240	294240320	340333824	384450400	420370752	326456896	338890176	375106176	431552928	453830752	465407648	469673248	202955008	268744640	227117584	218829216	130775928	226002992	208686432	223300832	229207232	258939168	130278800	158933920	138497872	152645472	113489480	216767496	186297552	201368896	372308992	351822944	432205824	403009568	404043776	394973216	219958928
M_HILIC-neg	6.52	3-Hydroxyphenylacetic acid	HMDB0000440	12122	C05593	C8H8O3	151.038			5368502	6952674	4618262	6885157	2387837	11293159	16057298	18731474	18213736	19004264	2270174	2854940	4372186	3364818	3522060	9889972	13744878	16694233	13954351	14129932	10118980	15643512	12204957	8755160	11734419	3346412	5239200	2009451	4738018	6757597	665743	7741866	9886987	9987244	9651968	13919550	12242978	13040498	14169952	13283046
M_HILIC-neg	5.05	3-Hydroxyvaleric acid	HMDB0000531	107802	NA	C5H10O3	117.054			1497724160	1488532736	1599192448	1434121984	1274745856	1485417600	1630939648	1756305024	1373467264	1318615296	1216560256	1147635968	1204536192	910582912	911597056	268748672	311031040	272101952	191250544	171938224	233962080	220943616	214828864	160167216	139386400	63982544	68833048	49294728	46478744	41818056	23086934	1086917760	1158874368	1212904192	1211063936	1303329024	954513408	822086144	785595392	729488192
M_HILIC-neg	4.4	Adenosine	HMDB0000050	60961	C00212	C10H13N5O4	266.089			2151654656	2070344320	1914897408	1897138432	1674620544	1703081472	1837028352	1870187776	1635826048	1633993856	2064771072	1995974784	2093752192	1881173248	1919713280	1366800384	1531590784	1462193408	1270866944	1205900032	1425184640	1291964544	1383021696	1162976640	1143106048	1190684416	1183596288	1076841472	981379712	925527040	1775886592	1830713216	1885164672	1927685888	1924893824	2167261696	1828599168	1651260672	1681752960	1621539328
M_HILIC-neg	9.96	Ala-Ile	HMDB0028690	NA	NA	C9H18N2O3	201.123			154738048	150426096	158729744	159060880	140277968	278760000	344275616	315256480	318603520	307949024	81148072	81231632	81105344	89246888	92198392	11849022	75683840	69890736	66441308	66842256	67715448	67766424	64570288	69582712	66176376	42743120	46749512	43672676	30071816	44719092	38964504	101118312	100215456	103341408	101443432	117159576	95947560	102223024	106424240	104242352
M_HILIC-neg	13.15	Alanine	HMDB0000161	5950	C00041	C3H7NO2	88.0387			9950530560	9671741440	10392072192	10963665920	10043418624	3740111616	4653778944	4748311552	4641305088	4658968064	1917913088	2004413824	2100346496	2029598976	2189021696	1795464960	2164517376	2128520576	2033576448	1950148736	1503854208	1543181952	1510998912	1531422080	1456404608	799184256	828859776	759909312	781583616	766594752	3847189760	4274364928	4443230720	4657262592	4609604096	5950513664	4465438720	4488130560	4942178816	4609796608
M_HILIC-neg	5.79	Allantoin	HMDB0000462	204	C01551	C4H6N4O3	157.035			745371904	716598656	658953472	489376320	489816288	495946016	534486784	577313728	415994848	326291328	315983328	325192896	294383296	95144560	168544944	360284992	272039744	274479808	247162368	67928304	290723424	267450848	183765680	108630720	124761072	104882176	29190394	173014576	35493260	29738742	14956062	391802880	439726624	447649344	493184800	543731072	459609664	329680736	345636736	326925888
M_HILIC-neg	2.82	alpha-Keto-gamma-(methylthio)butyric acid	NA	NA	NA	C5H8O3S	147.011			368790976	312321504	327930656	263532816	94131272	303099392	345626944	345899872	135328256	246652432	7127444	7219978	18740308	11596983	13420741	34771608	39224984	32912496	23620526	21786512	34642696	29799168	14334177	17120236	17706630	6503402	4173664	2894410	7258743	3558729	9620331	150412448	161240880	158650032	153611872	193976896	95450376	95803496	96240376	94394704
M_HILIC-neg	17.46	Citraconic acid	HMDB0000634	643798	C02226	C5H6O4	129.018			126605848	100963680	132730752	128046568	146151680	47110568	58571744	61249992	84604320	58541328	15304312	22682340	16898408	21898874	25423944	20545056	32981580	19172052	31934516	28014548	16557133	22133956	14736049	10275298	15156389	45056304	52580560	47824296	53494772	47317612	21504220	43033556	44791132	48528884	44579404	95259464	54076916	57025392	57566912	63526556
M_HILIC-neg	17.08	Citramalic acid	HMDB0000426	1081	C00815	C5H8O5	147.029			133251960	21595258	84798760	19062470	71703184	66460356	62915692	131167024	14138930	113599392	69158064	166338864	224378464	127398208	107230936	222822096	152508928	98025120	212215984	57169264	90795624	193366192	114272600	175216464	125581768	36933980	29875638	7253639	28238636	12932853	21488282	89572960	124825296	114146368	47458360	142577408	135053136	138809152	144959024	116586240
M_HILIC-neg	19.28	Glu-Gln	HMDB0028817	10171586	NA	C10H17N3O6	274.104			7924429	9535745	8261550	9784782	8987595	2516133	3757692	4141609	4156659	4470506	216121	759159	906908	852594	804116	800894	553312	1303494	324530	1188273	710596	813338	1188957	1389415	1103604	1810896	418719	470269	1565533	1025367	2603127	2508608	2736930	2337288	2689296	3303426	2704983	3105079	3282349	3223205
M_HILIC-neg	10.72	Glyceraldehyde	HMDB0001051	751	C02154	C3H6O3	89.0228			3357252096	3524258816	3729526528	3940114432	3629646848	3182304256	4023849216	3826789632	3718588672	3854410240	2380604160	2694603008	2681737984	2764723968	2759490816	1995056256	2326040320	2194156544	2138469632	1955322112	1819027456	1836145280	1849861632	2006662784	1754393600	866549504	1326731264	1363030912	561279808	1362921984	156629728	2955303680	3054913024	3005767424	3095956224	3739854080	3016515584	3109570560	3294503680	3124179456
M_HILIC-neg	11.13	Gly-Leu	HMDB0000759	92843	C02155	C8H16N2O3	187.107			407904736	395761600	421552768	484512480	407780288	412054880	514911072	502404768	498191040	528427168	136539072	161797520	163216608	164028272	170679712	92977032	110558832	103553336	94293336	101087184	100620360	99453544	90272792	91602544	96291680	55716156	61194900	54022312	60620356	52816740	158057056	172485792	180408800	175465744	184866512	207215808	177292768	179722864	195106768	185267952
M_HILIC-neg	4.53	Homogentisic acid	HMDB0000130	780	C00544	C8H8O4	167.034			17546054	12247207	12706702	8034873	8156818	55926540	57350536	60917468	55437120	56990924	4326552	5474354	9582637	1517009	2741376	51567992	68275792	85681216	54544948	50875468	43998528	60370680	37641844	24186538	30533974	15395607	17453892	11802909	8241478	8236897	294402	55178316	62862104	58649508	54445472	62870688	47822012	38315428	36775096	33453422
M_HILIC-neg	1.97	Indole-3-carboxylic acid	HMDB0003320	69867	C19837	C9H7NO2	160.039			3035504	3903019	3398716	3042868	2396352	2238873	1964277	2472385	1264582	1344944	2103334	1561286	1558683	1236705	1184615	2513268	2743854	3982704	2090011	2077795	3726500	3530639	3392019	2305408	2227663	22438736	27492022	12604771	20758002	16759597	3186239	4258088	5819337	6383096	6496962	8538251	4547088	3881322	5407480	4534652
M_HILIC-neg	14.72	Inositol	HMDB0000211	NA	C00137	C6H12O6	179.055			212954928	204186192	221629264	242395008	209058704	208933504	252592048	252938480	234001392	233117696	188786784	178052960	183163808	182308448	199077536	113458776	107384280	101203984	88327008	71848128	97391880	100629288	93822440	104601352	71929408	63940312	58095088	61720216	84634664	46352240	41905744	146108768	65945520	145722896	144725008	176065024	145854176	49518072	142043536	146717088
M_HILIC-neg	2.38	Ketoleucine	HMDB0000695	70	C00233	C6H10O3	129.054			15904403456	14687456256	15866188800	14700675072	13165858816	11221532672	13365570560	13361504256	11444976640	11464495104	766937536	752264512	931891520	684815168	604151552	2625501952	2856818176	2993476608	1947364608	1989818624	2246448640	2305028608	1915853312	1535697664	1791791232	556131776	744105280	557582272	542128896	443053376	7774591488	8554775040	9152616448	9011460096	9104582656	10455043072	7762468864	6916766208	6973894144	6691530752
M_HILIC-neg	1.19	Kynurenic acid	HMDB0000715	3845	C01717	C10H7NO3	188.034			5090404	11313705	12850387	11482312	7389436	11157004	9650260	9697790	7424321	6736579	4700268	4758158	4544194	3123781	2834214	1633032	1878576	2055702	1275979	2367266	1550817	1510297	1715677	1274068	1040494	2099300	2103859	1615173	1466621	959476	6619864	8040314	7049838	8116342	7119412	8708849	6673124	5718988	6353502	5844067
M_HILIC-neg	9.99	L-Leucine	HMDB0000687	6106	C00123	C6H13NO2	130.086			1538819328	1505909888	1620592640	1762682240	1497553024	2030131072	2596364544	2558989312	2497617152	2590534912	1148355200	1408235904	1409440384	1402849536	1359175040	933555648	1070078400	1127905792	953162944	977771200	898780864	1072210496	965223104	905488000	959443264	518352960	701585088	580428480	706334208	628341632	1063106496	1411508224	1417778432	1458564864	1466775296	1846291072	1369839104	1443013120	1453570560	1519511296
M_HILIC-neg	11.55	L-Tyrosine	HMDB0000158	6057	C00082	C9H11NO3	180.065			480927712	477005408	484390368	541887488	438947328	333260576	415531968	439054176	388770912	424162816	368040096	434786880	443861696	419436192	411972064	218516960	254323792	248569328	216613648	221518016	228956448	231450976	219671216	207575584	211699728	190910352	222354144	189446768	209182480	188206864	352876416	362676864	380227904	384903008	370865952	495598656	360573472	350563104	369936352	355528832
M_HILIC-neg	16.92	Maleic acid	HMDB0000176	444266	C01384	C4H4O4	115.002			522630432	484560800	736613568	587109824	579212224	607997248	664765952	704652416	679696064	688979072	500238272	581094144	623107456	376628736	401403040	405296928	471816256	464494208	488779392	445223744	305711424	286703840	315173600	335001760	303536576	236757248	248288336	239071504	252483632	233573984	831769600	860920512	888180992	940157376	942471744	1162174720	940474688	930347648	991257984	966723008
M_HILIC-neg	9.52	Mannitol	HMDB0000765	6251	C00392	C6H14O6	181.07			6068750	7645826	9033420	9139045	9891886	8566515	14791070	10693580	12832570	12467171	19626072	37548480	24066556	28384576	28639752	20005286	28290790	25862866	31682508	33159858	21124632	22034754	24031874	32921318	32794800	6468498	5736036	5689662	7225446	6865641	8301434	20568028	15886576	16349325	18282062	34770396	30095488	19118318	22124732	21887694
M_HILIC-neg	13.19	Methylsuccinic acid	HMDB0001844	10349	C08645	C5H8O4	131.033			40517312	40476088	41058788	39442448	41171568	106541616	97282752	52973384	66049072	53518648	520919104	463178848	374813472	372395648	378586752	419510848	315849216	344231136	342439392	342393152	394203136	270090016	286496288	278724096	258914848	266119568	287206816	246981232	242836416	352083456	751644736	157978080	84678376	39360376	96089968	35764368	40268888	295696480	74498936	70822784
M_HILIC-neg	14.23	N,N-Dimethylglycine	HMDB0000092	673	C01026	C4H9NO2	102.054			47596208	39973396	43523792	45733644	36542068	9479241	7209605	5957180	8626156	4615371	13345152	21358334	21183754	18045944	17864426	44549576	51610764	56869716	43182764	48982476	28131326	29307108	23999078	20967898	30311794	5639856	20662288	13344050	17521582	9635332	27600720	29001584	30855458	31228742	32668596	41195944	28018652	33543818	35042164	33599092
M_HILIC-neg	11.51	N-Acetylserine	HMDB0002931	65249	NA	C5H9NO4	146.044			307708800	300817024	342667552	369106400	333823552	120189840	129392312	166107760	132443024	145612624	87907680	103917688	98061128	101366752	112361520	34608332	33321896	32672192	31485906	35375608	23241688	24105372	25940018	24300390	24909826	1711610	6163980	4098640	3408980	5796524	964332	50550176	55252816	58918172	58809004	76579344	68445896	69186152	70999512	71809848
M_HILIC-neg	12.15	N-Methylalanine	NA	NA	NA	C4H9NO2	102.054			79079240	79069864	69491120	87674232	76177520	33869036	41255488	36277460	33530518	37288088	9611292	17982174	16988666	7004022	7827366	17731580	24269230	20883722	11730289	18763168	18682570	7735394	18660784	18775000	19354888	26771286	28614608	29828564	29560730	26956732	34673676	35768800	34254148	36339272	35577504	49881100	46969996	36911512	38878920	36606204
M_HILIC-neg	1.13	Oleic acid	HMDB0000207	445639	C00712	C18H34O2	281.248			729951424	787692736	741375872	665713280	596080512	548718400	605558592	555112320	475863872	536314592	319372480	288212032	237994624	255039312	265891440	371452032	370767264	329584096	310783776	333166112	392498016	392646880	362923552	378756480	348651744	289168992	326985504	279787520	277276448	248450288	539697216	570723264	582037888	578065664	552834368	477286272	493552544	511744992	478599616	451876512
M_HILIC-neg	1.17	P-Anisic acid	HMDB0001101	7478	C02519	C8H8O3	151.038			17492894	20455966	24273686	20411928	18110310	5457520	6122768	6621594	5829962	4393488	3454927	2988514	6696794	681646	3045968	3633440	5130970	5600544	4249324	7317610	4484597	4792967	4760556	6506684	3233485	12597250	7591042	8558042	7336884	6433834	14016887	14816881	10063052	15092752	15865180	18548022	8652424	8102798	9802029	9613926
M_HILIC-neg	1.35	Salicylic acid	HMDB0001895	338	C00805	C7H6O3	137.023			35509180	42984236	56332800	33938872	52713816	49867152	44899116	51892220	34564492	44631432	37265396	31215684	34143932	28441854	28436468	39121620	35526048	33391616	39028816	19851688	30627096	31476670	24766472	25454114	21659902	29699316	30125988	33810740	27186778	20324322	23570512	33036238	35949500	36774460	34399164	66423868	37477836	44373572	35698812	28633360
M_HILIC-neg	1.76	tert-Butyric acid	NA	NA	NA	C6H12O2	115.075			44876780	51158776	50071184	58106608	47560672	36885208	37829560	33808588	41915392	32375572	26078248	27437204	28682426	44736480	46064476	30960800	31412882	49542164	39499448	31624112	18276346	30838230	34179244	18044018	26654248	37793496	35070460	23192584	42199328	44235556	20927846	19354062	35848480	26110328	29728270	57727120	35900160	35023492	35820576	39011468
M_HILIC-neg	2.11	Uracil	HMDB0000300	1174	C00106	C4H4N2O2	111.019			7394244096	6966533120	7573899264	6215066624	5568787456	8441867776	9569290240	9489933312	7566134272	7494822400	8256385536	8165175808	8375180288	6666185728	6389499904	5148971520	5643408384	5646741504	3846292480	3664508928	4702391296	4895116288	4460152320	3227417600	2983609600	2743163648	2935049472	2203823104	1937503104	1625699712	6901600256	7119418368	7179275264	7225963008	7321179648	8511197696	6807625728	5906152448	5596100096	5395200000
HILIC-pos	7.175	1-Methyladenine	HMDB0011599	78821	C02216	C6 H7 N5	149.07	22	22	82870.7	91507.7	91063.6	104812	79305.2	1.60245e+06	1.7663e+06	1.76398e+06	1.44293e+06	1.31597e+06	2.34306e+06	1.83753e+06	2.67001e+06	1.93184e+06	2.01695e+06	1.59953e+06	1.91356e+06	2.05878e+06	1.78996e+06	2.44981e+06	2.4569e+06	1.6971e+06	1.81406e+06	1.6621e+06	1.83468e+06	1.70323e+06	1.68286e+06	1.94232e+06	1.72804e+06	1.67662e+06	1.48089e+06	2.13347e+06	1.53662e+06	1.89416e+06	2.21564e+06	2.96176e+06	1.56434e+06	2.12397e+06	2.2498e+06	1.70071e+06
HILIC-pos	15.363	2-Aminoadipic acid	HMDB0000510	469	C00956	C6 H11 N O4	161.069	13	13	2.90385e+06	3.06433e+06	2.94656e+06	3.38083e+06	2.56277e+06	4.74082e+06	5.92052e+06	5.28047e+06	5.65781e+06	5.70586e+06	2.66335e+06	2.34626e+06	2.7111e+06	2.91336e+06	2.85488e+06	2.18085e+06	2.42255e+06	2.37278e+06	2.27228e+06	1.76014e+06	2.7368e+06	2.9061e+06	2.60101e+06	2.57449e+06	2.84244e+06	3.95231e+06	3.84996e+06	3.53367e+06	4.23507e+06	3.79718e+06	3.67437e+06	3.85883e+06	4.13377e+06	3.75889e+06	3.91495e+06	5.35505e+06	3.8407e+06	3.43791e+06	3.48245e+06	4.37437e+06
HILIC-pos	3.353	2'-Deoxyadenosine	HMDB0000101	13730	C00559	C10 H13 N5 O3	251.103	16	15	708097	705457	457786	901871	798127	715462	943286	839250	974576	856776	831199	871822	378477	924512	949886	393009	436107	401447	392891	362447	413565	250969	332227	347375	340575	522285	407977	484972	778350	772876	646087	648667	681831	754793	668804	833610	446111	584095	658051	706661
HILIC-pos	2.647	2'-O-Methyladenosine	HMDB0004326	317398	C04779	C11 H15 N5 O4	281.113	21	6	269747	327402	189626	339913	263302	226089	268808	362406	416415	323630	99772	114735	62052.4	131277	178472	48154.5	45607.8	43892.1	60391.9	59561.3	51540.1	35859.7	44131	60438.2	72145.7	46344.4	42395.4	52169.1	56879.6	73685.6	136533	151025	148387	148535	164276	158234	139691	145864	146767	159060
HILIC-pos	11.974	4-Coumaric acid	HMDB0002035	637542	C00811	C9 H8 O3	164.048	26	26	1.84658e+06	1.38149e+06	1.91784e+06	2.04634e+06	784660	1.09558e+06	1.05869e+06	1.44654e+06	1.72158e+06	986725	2.72025e+06	2.8117e+06	2.82482e+06	2.91209e+06	2.79225e+06	1.55555e+06	1.72452e+06	1.58133e+06	1.41512e+06	1.40511e+06	1.44207e+06	1.53216e+06	1.19809e+06	1.28626e+06	1.28542e+06	999621	1.03962e+06	935869	1.09531e+06	916988	1.39998e+06	1.49246e+06	1.92096e+06	1.16955e+06	935468	2.36912e+06	1.2541e+06	1.38749e+06	1.53297e+06	1.48897e+06
HILIC-pos	13.916	Acetylarginine	HMDB0004620	67427	NA	C8 H16 N4 O3	216.123	7	7	6.25253e+06	6.29973e+06	6.34303e+06	6.77722e+06	6.396e+06	3.62479e+06	4.03935e+06	3.6633e+06	4.1018e+06	4.08527e+06	3.91574e+06	3.99539e+06	4.01274e+06	4.16491e+06	4.28069e+06	3.83422e+06	3.97554e+06	3.74088e+06	4.03606e+06	3.95071e+06	6.24914e+06	5.39603e+06	3.75317e+06	6.01332e+06	4.11664e+06	1.49825e+06	1.46838e+06	1.47505e+06	1.54176e+06	1.3941e+06	4.8533e+06	5.23761e+06	5.48376e+06	5.50179e+06	5.26507e+06	6.3357e+06	5.21361e+06	5.20578e+06	5.37598e+06	5.32512e+06
HILIC-pos	16.529	Adenosine 5'-monophosphate	HMDB0000045	6083	C00020	C10 H14 N5 O7 P	347.064	32	27	1.28265e+06	1.31342e+06	1.30484e+06	1.31774e+06	1.36405e+06	153123	153390	201399	218058	202997	66554.8	84832.7	112281	162164	114080	187040	192809	168847	109683	158773	115778	99302.4	97869.1	125483	177149	110997	87182.7	117205	63252.1	66961.4	233305	403296	344274	512833	296793	505678	265662	452512	285538	431551
HILIC-pos	13.32	Alanyltyrosine	HMDB0028699	NA	NA	C12 H16 N2 O4	252.112	8	8	329495	505142	479145	604424	534664	870487	939078	832397	1.04253e+06	905174	512150	535033	506747	528991	542299	483886	472106	405632	464495	447829	374401	348048	181956	364333	364007	206292	189936	199608	195601	195836	527789	596066	594903	631183	615326	719936	588127	599713	598337	609821
HILIC-pos	13.126	cis-4-Hydroxy-D-proline	HMDB0006055	69248	C01015	C5 H9 N O3	131.059	8	8	614030	632503	660763	378459	667297	652810	723415	681300	702694	704307	1.19464e+06	1.26777e+06	1.25684e+06	1.29457e+06	1.28361e+06	552049	570684	482857	558432	493449	289942	274255	163986	286844	301827	221886	171825	204279	185169	211417	617996	739717	727368	789133	779121	878965	713484	736253	732828	744624
HILIC-pos	20.617	Cystathionine	HMDB0000099	439258	C02291	C7 H14 N2 O4 S	222.068	18	16	1.21095e+06	1.29108e+06	1.15307e+06	1.35136e+06	1.24245e+06	932033	1.15011e+06	1.0801e+06	1.0029e+06	548895	392805	366577	417792	485821	404773	600719	1.04562e+06	872444	774750	798127	802718	743375	704961	719017	794638	452718	495126	235633	506295	405593	824875	1.02289e+06	788689	1.00614e+06	933803	1.38643e+06	979574	1.05136e+06	978948	876361
HILIC-pos	21.259	Cytidine 5'-diphosphocholine	HMDB0001413	13804	D00057	C14 H26 N4 O11 P2	488.109	14	13	451998	410143	448408	509875	444995	170508	188278	148282	215751	167074	115167	86603.3	68803.1	76750.3	119879	68636.6	49268.2	106069	71900	86380.9	46990	45391.1	45925.3	46209	55146.8	20772.5	20088.2	22136	33306.2	20124.3	173153	194419	191421	174929	192083	210097	119097	182513	183200	209554
HILIC-pos	18.585	Cytidine 5'-monophosphate	HMDB00095	NA	C00055	C9 H14 N3 O8 P	323.053	21	15	101665	268691	219443	366587	258882	107020	130270	105330	124696	93513.3	10482.4	16765.1	25362.1	24672.2	25545.7	16067.4	30093.9	31374	23984.4	26468.3	24113.9	18351.3	12325.6	17257.4	23213.5	14661.8	16901.7	18223	20563.6	18891.4	99112.9	76454.7	117845	106020	81270.1	122801	78982.3	95931.2	102711	96139.3
HILIC-pos	20.113	D-Glucose 6-phosphate	HMDB0001401	5958	C00668	C6 H13 O9 P	260.031	30	29	4.45264e+06	3.49376e+06	3.79347e+06	3.83195e+06	3.53112e+06	2.28551e+06	2.65433e+06	2.28253e+06	3.12832e+06	3.0264e+06	1.73944e+06	2.244e+06	2.97227e+06	2.84068e+06	2.77296e+06	822716	1.02976e+06	885764	697555	620664	574520	567114	629719	526236	647076	591830	475930	494470	635093	466997	2.27887e+06	2.03865e+06	1.78679e+06	2.19809e+06	1.65886e+06	4.03556e+06	1.91506e+06	2.11678e+06	2.09159e+06	2.29013e+06
HILIC-pos	12.391	DL-Carnitine	HMDB0000062	2724480	C00318	C7 H15 N O3	161.105	7	6	1.97098e+08	1.88132e+08	2.05509e+08	2.12874e+08	1.99753e+08	1.92205e+08	2.14972e+08	2.13244e+08	2.19702e+08	2.19687e+08	2.08556e+08	2.01293e+08	2.16941e+08	2.36705e+08	2.36346e+08	1.264e+08	1.46314e+08	1.42646e+08	1.41647e+08	1.37428e+08	1.1314e+08	1.12135e+08	1.07801e+08	1.12062e+08	1.22729e+08	2.16453e+08	2.16599e+08	2.14664e+08	2.27675e+08	2.23463e+08	2.15375e+08	2.06985e+08	2.12256e+08	2.00088e+08	2.06454e+08	2.46762e+08	1.99337e+08	2.03743e+08	2.1854e+08	2.04678e+08
HILIC-pos	19.763	D-Raffinose	HMDB0003213	10542	C00492	C18 H32 O16	521.198	11	11	3.88911e+06	2.31444e+06	3.96537e+06	3.48423e+06	3.2209e+06	2.45071e+06	2.74044e+06	2.69493e+06	2.09129e+06	2.66473e+06	983836	1.26802e+06	1.19255e+06	1.22202e+06	1.11332e+06	494733	434341	646500	485158	490566	344150	401115	228562	280272	358681	105961	117181	87186.8	114713	100037	2.0227e+06	1.99925e+06	1.9622e+06	2.00905e+06	1.7017e+06	2.53928e+06	1.907e+06	1.83077e+06	2.08672e+06	1.84207e+06
HILIC-pos	7.412	Inosine	HMDB0000195	6021	C00294	C10 H12 N4 O5	268.082	12	12	54339.8	50088.7	52912.2	60705.9	54570.3	67935.1	85076	74265	84532.9	91779.9	96877.2	74502.5	88015.7	80889.8	90437.6	182642	220306	210773	210187	167700	299030	288759	266862	244721	235601	648565	556723	538466	545713	531807	224221	221990	248318	257318	252987	331192	228414	241492	237453	245812
HILIC-pos	10.942	Leucylproline	HMDB0011175	44369311	NA	C11 H20 N2 O3	228.148	29	29	3.09965e+06	3.13091e+06	3.8568e+06	3.62193e+06	2.69602e+06	3.44516e+06	7.95619e+06	9.31322e+06	5.19799e+06	5.9274e+06	1.72822e+06	1.9539e+06	1.95954e+06	1.8914e+06	1.9475e+06	1.30467e+06	1.69727e+06	1.69504e+06	1.42016e+06	1.53493e+06	1.48222e+06	1.60689e+06	1.33651e+06	1.00411e+06	1.91866e+06	784096	1.13324e+06	1.00258e+06	1.38652e+06	1.11804e+06	2.99479e+06	3.08719e+06	3.85378e+06	4.0033e+06	3.15526e+06	4.95722e+06	1.64789e+06	3.70334e+06	4.67956e+06	4.15173e+06
HILIC-pos	12.717	L-Histidinol	HMDB0003431	165271	C00860	C6 H11 N3 O	141.091	7	6	2.96783e+07	4.18966e+07	4.5199e+07	4.89805e+07	4.77664e+07	3.60253e+07	3.56958e+07	3.87417e+07	3.51083e+07	3.70816e+07	1.70288e+07	1.62651e+07	1.7124e+07	1.75207e+07	1.70357e+07	5.67815e+06	6.37998e+06	6.49928e+06	7.73386e+06	7.07777e+06	4.51475e+06	4.35535e+06	2.78151e+06	4.91124e+06	5.08644e+06	2.87876e+06	3.2736e+06	3.1665e+06	3.77875e+06	2.78138e+06	2.70215e+07	2.75194e+07	2.72924e+07	2.74724e+07	2.70344e+07	3.06977e+07	2.61861e+07	2.52136e+07	2.66954e+07	2.6739e+07
HILIC-pos	10.03	L-Norleucine	HMDB0001645	21236	C01933	C6 H13 N O2	131.095	22	22	2.32305e+07	2.48216e+07	2.74113e+07	3.01907e+07	2.55989e+07	2.67493e+07	3.43158e+07	3.41894e+07	3.75997e+07	2.40302e+07	1.63801e+07	1.86281e+07	1.79893e+07	2.13963e+07	1.95644e+07	1.40047e+07	1.8624e+07	1.65894e+07	1.48722e+07	1.57139e+07	1.19524e+07	2.00475e+07	1.86264e+07	1.80468e+07	2.04465e+07	1.01967e+07	1.29479e+07	9.85438e+06	1.35353e+07	1.10528e+07	2.00862e+07	2.05436e+07	2.37027e+07	2.34452e+07	2.07501e+07	2.677e+07	2.16063e+07	9.04118e+06	2.62604e+07	2.14679e+07
HILIC-pos	21.169	L-Saccharopine	HMDB0000279	160556	C00449	C11 H20 N2 O6	276.133	26	26	7.87893e+06	9.1947e+06	9.15142e+06	9.32748e+06	9.08689e+06	3.58496e+06	4.38216e+06	3.82374e+06	3.87216e+06	3.74469e+06	617731	713492	850039	719808	763276	890413	704960	1.2051e+06	1.26854e+06	946315	820366	838862	885002	958280	1.37931e+06	343206	379436	374200	346416	357396	2.42873e+06	1.60159e+06	3.0962e+06	3.11472e+06	2.58368e+06	3.72365e+06	1.74539e+06	3.02107e+06	3.2429e+06	1.83092e+06
HILIC-pos	2.487	L-Tyrosine methyl ester	HMDB0029217	70652	C03404	C10 H13 N O3	195.09	29	29	436086	405414	205372	435772	214175	382345	745021	610003	737052	545800	376621	308116	178391	191394	385948	383239	217802	419280	425066	431894	166335	522268	352798	550612	453620	286392	331219	312012	188684	226005	578993	287450	614464	376583	408253	721871	514142	511170	577934	264743
HILIC-pos	17.536	N6,N6,N6-Trimethyl-L-lysine	HMDB0001325	440120	C03793	C9 H20 N2 O2	188.153	21	21	2.75098e+07	2.6666e+07	2.38001e+07	2.98737e+07	2.54431e+07	3.05171e+07	2.50471e+07	3.50841e+07	4.88754e+07	3.57679e+07	4.77699e+07	6.80856e+07	6.1089e+07	7.349e+07	7.2291e+07	7.55065e+07	9.36093e+07	8.66434e+07	9.19785e+07	7.77777e+07	9.30972e+07	5.52101e+07	8.8652e+07	7.112e+07	8.18805e+07	7.24681e+07	7.67521e+07	7.65318e+07	8.52691e+07	7.41025e+07	8.95236e+07	1.01746e+08	7.20286e+07	7.59439e+07	6.99256e+07	8.92428e+07	7.98399e+07	7.95867e+07	4.68224e+07	8.18342e+07
HILIC-pos	14.319	N-Acetyl-D-lactosamine	HMDB0001542	439271	C00611	C14 H25 N O11	383.144	10	9	18799.1	23790.9	23369.9	28827.1	18587.4	89257.7	83525.7	88618.7	101495	92518.7	292356	277217	286359	316164	313850	181559	200685	209850	198729	205628	114275	118645	133941	130153	127635	92827	92341.3	97455.4	101352	68915.8	146624	152438	152125	139372	135674	106189	142644	143373	142850	140666
HILIC-pos	13.919	N-Acetylornithine	HMDB0003357	439232	C00437	C7 H14 N2 O3	157.074	19	18	9.81835e+06	9.37816e+06	9.97817e+06	1.11782e+07	1.00939e+07	8.41408e+06	9.80255e+06	9.83217e+06	1.05606e+07	1.10165e+07	5.90012e+06	6.12166e+06	6.42279e+06	6.94181e+06	7.15553e+06	4.90482e+06	5.61645e+06	5.22695e+06	5.93105e+06	5.60286e+06	4.7401e+06	4.41537e+06	3.83499e+06	5.09033e+06	5.27827e+06	5.98182e+06	6.13149e+06	2.96731e+06	6.41356e+06	6.68561e+06	7.33833e+06	7.55477e+06	8.00213e+06	7.90872e+06	7.83422e+06	1.07969e+07	8.38547e+06	8.53118e+06	8.82263e+06	9.44853e+06
HILIC-pos	9.531	N-Acetylputrescine	HMDB0002064	122356	C02714	C6 H14 N2 O	130.111	13	12	70267	104272	69760.1	72801.5	116173	61111.5	94459.7	88674.3	58395.2	89824.1	41249.4	30046.2	32611	57480.8	47762.1	211854	238577	211219	227086	199227	1.5482e+06	1.21105e+06	1.33288e+06	1.24986e+06	1.25661e+06	286063	289346	287999	313851	279009	453843	475102	428823	423317	545910	337895	423535	402939	459824	461383
HILIC-pos	1.667	Norfenefrine	NA	NA	D08286	C8 H11 N O2	153.079	40	29	136628	98701.6	105415	89981.5	78943.9	238734	38945.2	34882.5	182428	180130	97118.3	83194.8	55995.6	79828.1	70798.1	69792.7	205872	125009	145676	90532.5	80909.6	135156	108799	90601.4	74717.7	325987	198346	268937	409557	281357	191714	195096	173008	188788	181133	321196	226918	120137	116228	210614
HILIC-pos	1.461	Norharman	HMDB0012897	64961	C20157	C11 H8 N2	168.069	7	7	1.72254e+06	1.66493e+06	1.88332e+06	2.02408e+06	1.82227e+06	1.71201e+06	1.93802e+06	1.87381e+06	1.77222e+06	2.09146e+06	1.85035e+06	1.91819e+06	1.76382e+06	1.99252e+06	2.17884e+06	2.85484e+06	3.23617e+06	3.10326e+06	3.46016e+06	3.03803e+06	2.94145e+06	2.75075e+06	2.35383e+06	2.91003e+06	2.74084e+06	3.2408e+06	3.26783e+06	2.84357e+06	3.6954e+06	3.51828e+06	2.55334e+06	2.89062e+06	2.77091e+06	2.71149e+06	2.85046e+06	3.18482e+06	2.95595e+06	2.72831e+06	2.85168e+06	2.52155e+06
HILIC-pos	18.897	Ornithine	HMDB0000214	6262	C00077	C5 H12 N2 O2	132.09	19	17	7.28924e+07	6.97659e+07	7.8602e+07	8.62496e+07	7.39667e+07	1.53698e+07	1.61475e+07	2.49678e+07	2.88699e+07	2.81087e+07	2.7375e+06	2.49329e+06	2.39308e+06	2.82568e+06	3.28019e+06	2.23074e+06	2.13797e+06	2.08544e+06	1.86392e+06	2.11142e+06	2.05852e+06	2.0305e+06	1.78701e+06	1.53306e+06	1.69078e+06	3.76821e+06	4.20049e+06	2.02274e+06	4.47248e+06	4.85887e+06	2.53175e+07	2.3405e+07	2.53096e+07	1.80581e+07	2.51797e+07	3.32746e+07	1.9991e+07	2.76902e+07	2.64029e+07	1.94745e+07
HILIC-pos	1.21	Prostaglandin B1	HMDB0002982	5280388	C00959	C20 H32 O4	336.231	20	20	616423	692786	665047	738240	674583	1.01189e+06	1.21469e+06	1.11992e+06	1.28781e+06	1.14871e+06	433101	436736	474411	553698	501315	453465	492341	493427	481953	452208	597225	463259	494130	543790	578883	99668.5	108279	114175	114167	98345.3	606273	463728	450661	452518	655856	803163	486821	428296	571942	551571
HILIC-pos	1.893	Pyridoxal	HMDB0001545	1050	C00250	C8 H9 N O3	167.059	15	14	897471	910303	940099	991446	873394	545720	667021	670711	561755	559925	446167	396061	306174	440757	411583	368255	427599	390109	369363	325458	275693	225029	263145	291460	264904	183017	226421	172440	326696	242670	609964	638567	635938	684669	651899	930393	561925	643708	649849	641325
HILIC-pos	12.552	Pyridoxamine	HMDB0001431	1052	C00534	C8 H12 N2 O2	168.09	18	16	1.23124e+06	1.4528e+06	1.54879e+06	1.5855e+06	1.27385e+06	1.7631e+06	1.21678e+06	1.62141e+06	1.44414e+06	1.68329e+06	1.59192e+06	1.42071e+06	1.28138e+06	1.26478e+06	1.32056e+06	1.66042e+06	1.382e+06	2.04691e+06	1.38106e+06	1.1865e+06	1.58075e+06	1.64589e+06	984060	1.35385e+06	1.5517e+06	2.64672e+06	2.73987e+06	2.37937e+06	2.2319e+06	2.0376e+06	1.21912e+06	1.45173e+06	1.86157e+06	1.56457e+06	2.17556e+06	2.09076e+06	1.82154e+06	1.70775e+06	1.71934e+06	1.70767e+06
HILIC-pos	15.679	S-Adenosylhomocysteine	HMDB0000939	439155	C00021	C14 H20 N6 O5 S	384.123	20	19	387660	366388	408143	373780	373576	203543	240213	241864	236740	247450	120366	125643	121461	94757.4	142629	55861.8	58014.1	72157.5	64013.8	62105.8	52281.8	53244.6	52276.6	41070.8	61726.9	47316.2	44051.1	41404.9	49261.8	44103.4	171621	172628	173003	164787	185144	250986	172910	126727	136985	213065
HILIC-pos	9.412	Thiamine	HMDB0000235	1130	C00378	C12 H16 N4 O S	264.105	10	9	3.47729e+06	3.24062e+06	3.75869e+06	3.67542e+06	3.83577e+06	6.01959e+06	6.61076e+06	6.55877e+06	7.2797e+06	7.33131e+06	7.73558e+06	7.69693e+06	7.29831e+06	8.90689e+06	8.09563e+06	7.58192e+06	7.70461e+06	7.67386e+06	6.81897e+06	8.56539e+06	7.08975e+06	6.9659e+06	6.20034e+06	7.10248e+06	8.03696e+06	8.2401e+06	7.28383e+06	6.63617e+06	9.57364e+06	7.98558e+06	8.39737e+06	8.13245e+06	7.89558e+06	6.89629e+06	7.5321e+06	8.87611e+06	6.64673e+06	7.65042e+06	8.76264e+06	7.90828e+06
HILIC-pos	8.072	Triethanolamine	HMDB0032538	7618	C06771	C6 H15 N O3	149.105	32	22	510800	299155	771283	721344	497418	163558	302536	433856	243547	339071	427191	330107	262469	298366	214266	274375	214358	290987	240681	753669	183539	241195	273562	282767	577133	276212	283885	315426	392961	420339	556233	618255	609539	639809	561268	444950	329777	414287	771666	685277
HILIC-pos	6.182	Tyramine	HMDB0000306	5610	C00483	C8 H11 N O	120.058	22	13	30766.7	72227.1	50646.1	45509.8	65437.1	34709.3	65369.1	47364.8	33520.8	49635	10024.3	13604.4	8929.01	20672.7	12038.6	8307.43	14880.7	17514.3	16492.8	13234.7	7630.78	12810.8	8789.5	10827.8	11490.9	7378.03	8230.14	9182.96	10568.3	17044.4	19986.7	19906.3	19405.9	21870.2	24727	22610.9	18061.9	20680.8	16676.7	25857.6
HILIC-neg	1.345	16-Hydroxyhexadecanoic acid	HMDB0006294	7058075	C18218	C16 H32 O3	272.234	47	27	68959.3	49923.8	102639	98956.7	106047	55564.2	71116.5	81892.5	93630.6	118187	26813.8	57424.5	66960.5	55049.8	66703.1	49785.6	44131.8	73442.9	46577.8	38876.6	26990.1	43775.2	53902.5	35522.3	34575.4	29421.1	27555.4	36307.5	22589.7	37806.9	45943.1	76715	114822	112636	77254	69148	59405	71184.9	89808.8	106846
HILIC-neg	1.359	2-Hydroxymyristic acid	HMDB0002261	1563	NA	C14 H28 O3	244.203	31	11	101529	98435.4	131268	128036	113759	57527.7	64642.9	75955.5	66442.6	84368	21906.2	18052.8	22959	28853.6	24124.4	18589.6	23068.5	18202.7	17848.6	19538.9	13770.4	17598.8	19877.1	16104.4	14022.7	3339.44	5301.34	4478.44	6674.52	2578.79	54497	61171.7	67162.2	67140.5	65541.7	56032.9	53316.7	56578.7	58880.4	74659.7
HILIC-neg	0.983	3-Aminosalicylic acid	HMDB0001972	68443	NA	C7 H7 N O3	153.041	27	25	45099.9	20446.3	62475	38613.4	110932	88188	64843	84609.4	50975.5	77702.8	103348	46958.7	48233.8	49394.6	46702.6	69720.8	102240	81884.4	110164	49552.7	83393.2	97650.4	115799	71330.3	82934.9	100707	109596	128148	98571.8	114129	72064.5	73275.2	67941.8	75075.5	71318.9	116371	105993	109289	60714.8	60252
HILIC-neg	1.133	3-Anisic acid	HMDB0032606	11461	NA	C8 H8 O3	152.046	27	16	60523.2	67051.9	83450.6	95032.9	88959.3	8284.54	9656.5	30560.2	6760.9	6244.82	2135.84	2891.33	57051.4	7607.99	8868.53	1736	3411.96	2972.31	2475.76	13248.1	1799.24	5263.94	3276.02	3371.71	5936.94	5720.97	7408.92	6125.87	6283.19	3995.67	16665.2	20853.6	15769.8	16904.1	22155.7	26371.2	17334.6	16981.6	18957.3	19245.1
HILIC-neg	3.922	3-Phenyllactic acid	HMDB0000779	3848	C01479	C9 H10 O3	166.062	34	12	1.85665e+06	1.94594e+06	2.11911e+06	2.15685e+06	2.05689e+06	1.74582e+06	1.98285e+06	2.35147e+06	1.92697e+06	2.39314e+06	586654	568967	682908	531974	750996	274792	284979	322507	279168	270747	303792	252931	265953	260570	247216	62392.1	64949.3	42120.4	51646.1	63336.2	959118	1.29243e+06	1.32447e+06	1.3355e+06	1.33153e+06	1.32887e+06	1.23604e+06	1.04681e+06	1.097e+06	1.32662e+06
HILIC-neg	6.81	4-Acetamidobenzoic acid	NA	NA	D03836	C9 H9 N O3	179.057	29	27	102266	95011.6	111997	91029.6	75783.6	142928	156693	163617	114935	135839	141829	149692	145144	102833	117341	153952	171724	139490	117259	126306	115471	108476	105635	75058	79222.6	162760	156838	127274	109467	99694.4	54820.8	130031	151320	151925	151370	211919	159016	129116	131978	126430
HILIC-neg	10.767	4-Oxoproline	METPA0228	NA	C01877	C5 H7 N O3	129.041	14	14	713388	848247	828185	743609	696141	334970	410867	383278	291132	332724	231941	303927	267934	267849	264024	144718	200361	196026	138052	132489	125363	144197	138079	123458	107521	127526	140540	117987	130388	129804	273637	333287	402572	355651	417327	470813	373844	349174	365499	350023
HILIC-neg	11.059	5-Aminovaleric acid	HMDB0003355	138	C00431	C5 H11 N O2	117.078	13	12	8.79038e+06	1.06615e+07	9.38406e+06	1.02224e+07	8.48084e+06	1.13749e+07	1.30582e+07	1.32013e+07	1.20179e+07	1.26057e+07	8.00927e+06	8.77018e+06	9.14601e+06	9.27318e+06	7.86182e+06	5.63094e+06	7.26956e+06	6.23265e+06	6.24781e+06	6.01375e+06	4.30859e+06	5.79837e+06	5.08072e+06	4.4461e+06	5.00779e+06	2.17398e+06	2.79841e+06	2.32167e+06	2.56273e+06	2.27574e+06	6.49331e+06	8.01287e+06	9.17606e+06	8.64728e+06	8.67296e+06	1.08678e+07	8.4091e+06	8.02471e+06	8.3285e+06	8.29152e+06
HILIC-neg	1.087	5-Hydroxyindole-3-acetic acid	HMDB0000763	1826	C05635	C10 H9 N O3	191.057	34	30	6886.46	7438.21	7993.88	7058.64	7648	19515	25683.1	34753.3	16441.6	14841.4	38067	31819.7	25496.5	31892.3	25068.8	30901.8	21313.1	34913.9	36519.8	66134.7	25960.3	29404.2	67077.9	73446.4	76127.4	101686	119497	159691	125326	158377	48518.7	46048.2	48423.4	53641.3	55546.6	34635.5	61112.8	34214.3	84544.2	40446.4
HILIC-neg	16.09	Alpha-ketoglutarate	HMDB0000208	51	C00026	C5 H6 O5	146.02	12	12	4.08545e+07	4.21587e+07	4.45508e+07	4.37508e+07	3.544e+07	1.92105e+07	1.88735e+07	2.06982e+07	2.18244e+07	2.16143e+07	1.20792e+06	1.2002e+06	1.42439e+06	1.09455e+06	1.25934e+06	7.79122e+06	9.3085e+06	1.05677e+07	8.93668e+06	8.67171e+06	9.04332e+06	8.10574e+06	9.0404e+06	8.47558e+06	8.93131e+06	7.41068e+06	6.55885e+06	7.04901e+06	6.77248e+06	5.98787e+06	1.99349e+07	2.05954e+07	2.32372e+07	2.27507e+07	2.29204e+07	2.99424e+07	2.30001e+07	2.11497e+07	2.47744e+07	2.14186e+07
HILIC-neg	13.288	Azelaic acid	HMDB0000784	2266	C08261	C9 H16 O4	188.103	18	16	317883	340656	345125	319448	294449	205720	254378	264525	324515	272020	142374	149619	195878	157036	163843	310391	474566	1.12112e+06	607588	161285	194210	201357	179380	159930	206541	96934.8	89657	85596.9	89527.6	74272.1	295135	330919	387771	387619	349159	526003	349670	322433	378464	335179
HILIC-neg	1.479	Caprylic acid	HMDB0000482	379	C06423	C8 H16 O2	144.113	20	18	121954	118091	154020	132584	137815	64759.8	91055.8	67982.7	79359.6	68228.6	56070.7	79760.9	99848.9	61873.1	60260.6	88400.9	91822	117575	61414.3	78638.3	95408.7	88055.8	100413	47549.1	75676.2	94554.3	115241	76628.5	81586.7	86747.4	74755.1	90851.5	96298.2	99285.3	98555	117019	61036.1	72912.2	89618.3	96770.9
HILIC-neg	13.121	D-Alanyl-D-alanine	HMDB0003459	5460362	C00993	C6 H12 N2 O3	160.084	10	9	1.14683e+07	1.23694e+07	1.1916e+07	1.33064e+07	1.09644e+07	1.05927e+07	1.29204e+07	1.29382e+07	1.31244e+07	1.3008e+07	4.49956e+06	4.75027e+06	5.01016e+06	5.43033e+06	5.62603e+06	3.80053e+06	5.01147e+06	4.49116e+06	4.17782e+06	4.40542e+06	3.48272e+06	3.52392e+06	3.49608e+06	3.60189e+06	3.58144e+06	1.42412e+06	1.58007e+06	1.4426e+06	1.79118e+06	1.67626e+06	1.04912e+07	9.39292e+06	8.92313e+06	9.37185e+06	9.66217e+06	1.18477e+07	9.51688e+06	8.85109e+06	1.06458e+07	9.76769e+06
HILIC-neg	1.309	Decanoic acid	HMDB0000511	2969	C01571	C10 H20 O2	172.145	12	12	71195.7	68009.3	79022.7	86693.1	75711.3	53719.3	59838.2	73602.1	54627.2	67620.2	91899.5	95032.7	87431.3	74732.4	71535.3	83932.3	87182.2	179878	72497.4	75589.5	74828.5	72871.7	74543.1	67029.3	85483.8	107183	80285	72959	117727	70920.9	70734.9	62087.8	87815.1	77213.3	85807.5	97038.9	82144.9	77115.3	78199.4	70520.3
HILIC-neg	6.544	DL-Mandelic acid	HMDB0000703	439616	C01984	C8 H8 O3	152.046	22	21	13181.6	11017.1	13405	8531.46	11367	48945.1	61698.5	66853.2	87923.8	83341.3	5284.93	6074.76	6256.22	7635.35	8299.91	41247.5	46629.1	53982.6	33907.3	45840.4	29478.8	56562.4	49537.3	22265.4	20596.8	14594.5	13676.8	10260.2	9629.17	17413	27287	34342.5	42755.9	46151.8	43170.4	59106.3	37173.8	47802.1	35845.6	38467.6
HILIC-neg	19.619	D-ribose 5-phosphate	HMDB0001548	439167	C00117	C5 H11 O8 P	230.018	12	9	413387	425314	516291	623683	467493	480648	583469	636514	577763	626782	730198	782008	829535	831338	875982	415549	547139	475275	493206	453971	407094	407891	389743	400586	472562	198633	225821	195908	135535	216833	501342	536625	560765	556707	559896	672354	475886	518416	587909	533832
HILIC-neg	21.489	D-Sedoheptulose 7-phosphate	HMDB0001068	22833559	C00281	C7 H15 O10 P	290.04	24	24	324536	141644	339178	249486	275021	141327	209606	131174	125749	158787	156264	140704	93993.4	109751	164522	130731	161201	126349	134405	129972	119365	132754	140049	146295	110788	119955	101447	131561	150905	83449	204793	120692	187843	174856	220012	229649	113955	182719	119628	214954
HILIC-neg	15.923	Gluconic acid	HMDB0000625	10690	C00257	C6 H12 O7	196.057	24	19	517458	762329	791886	810861	565712	327003	471017	646385	551615	797415	1.83126e+06	2.74837e+06	3.17849e+06	5.15193e+06	6.33283e+06	1.1693e+07	1.43237e+07	1.34791e+07	1.16441e+07	1.24496e+06	1.46019e+07	1.59119e+07	1.37003e+07	1.18494e+07	1.78077e+07	894138	955903	707522	1.44616e+06	643724	9.03651e+06	9.71264e+06	5.40101e+06	8.89478e+06	8.62937e+06	1.03467e+07	8.02095e+06	6.52732e+06	655667	9.43431e+06
HILIC-neg	21.023	Guanosine monophosphate (GMP)	HMDB0001397	6804	C00144	C10 H14 N5 O8 P	363.057	21	20	115323	61252.4	99894.5	128921	71622.7	17875	18130.1	20139.8	19785.9	18221.5	2525.67	6606.42	5772.04	7544.79	9357.43	9981.93	9417.37	8810.16	10419.5	8852.37	6553.74	4965.57	4952.82	3873.43	3587.36	5976.68	3860.8	3968.15	2818.39	2616.84	21534.6	17811.4	19653.4	26779.4	22624.8	32717.7	26700.4	24793.9	27705.2	18835.8
HILIC-neg	1.099	Indole-3-acetic acid	HMDB0000197	802	C00954	C10 H9 N O2	175.062	10	7	251291	223380	253649	252423	259387	829843	906132	836053	837636	867181	351813	386359	337530	360484	346222	501195	573969	546888	545788	520983	395925	423114	448058	440465	376823	1.14255e+06	1.24965e+06	1.30443e+06	1.27105e+06	1.21049e+06	559197	622807	633664	689354	607812	722809	615581	597338	655916	584886
HILIC-neg	17.311	L-Glutamic acid	HMDB0000148	33032	C00025	C5 H9 N O4	147.052	13	12	5.01243e+07	4.9761e+07	5.44315e+07	5.0612e+07	4.71209e+07	2.39771e+07	2.85938e+07	2.78494e+07	2.6126e+07	2.48464e+07	1.7862e+07	1.71362e+07	1.75599e+07	1.86556e+07	1.82755e+07	1.40267e+07	1.57374e+07	1.51386e+07	1.43434e+07	1.32933e+07	1.42999e+07	1.33593e+07	1.38181e+07	1.3432e+07	1.55951e+07	3.86776e+07	3.74561e+07	3.31425e+07	3.45632e+07	3.31645e+07	3.0158e+07	3.2343e+07	2.86544e+07	2.9876e+07	2.89551e+07	4.25874e+07	3.05712e+07	2.9987e+07	3.10835e+07	3.00017e+07
HILIC-neg	12.308	L-Threonic acid	HMDB0000943	151152	C01620	C4 H8 O5	136.036	14	13	2.2053e+06	2.31313e+06	2.93476e+06	2.9239e+06	3.08691e+06	2.27754e+06	2.05377e+06	2.88226e+06	1.99999e+06	2.46344e+06	2.89114e+06	3.29336e+06	3.12411e+06	3.84232e+06	2.91335e+06	2.66502e+06	3.09113e+06	3.16989e+06	2.535e+06	3.11571e+06	2.06089e+06	2.20213e+06	1.93553e+06	1.9428e+06	1.98946e+06	1.33538e+06	1.48192e+06	1.19357e+06	1.41439e+06	1.16029e+06	2.04963e+06	2.99366e+06	2.71712e+06	2.67313e+06	2.68442e+06	3.4225e+06	2.91262e+06	2.44447e+06	2.74757e+06	2.93331e+06
HILIC-neg	2.852	Methyl acetoacetate	HMDB0000310	7757	NA	C5 H8 O3	116.046	14	10	2.34885e+07	2.14857e+07	2.52329e+07	1.96807e+07	1.87559e+07	1.60817e+07	1.80103e+07	1.80721e+07	1.37925e+07	1.55865e+07	819583	810624	1.01252e+06	749441	973403	3.26689e+06	3.96156e+06	4.84699e+06	3.28135e+06	3.71243e+06	3.00235e+06	2.99884e+06	2.6481e+06	2.76821e+06	2.81506e+06	425965	693360	607684	642278	540196	9.12199e+06	9.9241e+06	1.07141e+07	1.01696e+07	1.14431e+07	1.26692e+07	9.62489e+06	9.55812e+06	1.10849e+07	9.9084e+06
HILIC-neg	8.549	Mevalonic acid	HMDB0000227	449	C00418	C6 H12 O4	148.072	25	21	7343.16	5690.65	7677.94	7312.11	1733	6745.12	7169.88	8503.82	7387.18	7495.04	1.43029e+06	1.51167e+06	1.5016e+06	1.00032e+06	1.1728e+06	4.0496e+06	6.42855e+06	5.75394e+06	4.20701e+06	4.21654e+06	8.85993e+06	7.45368e+06	8.35496e+06	6.73048e+06	5.81345e+06	483332	513002	356303	304573	258751	3.50764e+06	2.26332e+06	3.80417e+06	3.98458e+06	3.61909e+06	5.45415e+06	4.34328e+06	3.6409e+06	3.58171e+06	3.46641e+06
HILIC-neg	17.301	N-Acetyl-DL-glutamic acid	HMDB0001138	185	C00624	C7 H11 N O5	189.062	14	13	1.11531e+06	1.04911e+06	1.14788e+06	1.32769e+06	1.0418e+06	461606	569372	539136	586422	567721	234401	259391	226565	252317	284135	210285	232184	253927	257151	228873	550739	482938	573385	535531	503370	195508	199981	189361	199082	184031	518445	523163	674838	609377	586487	805223	547263	608239	600866	581812
HILIC-neg	12.369	N-Acetyl-L-glutamine	HMDB0006029	25561	D07063	C7 H12 N2 O4	188.078	7	7	821136	780198	942596	884034	845781	41217.6	52249.7	43420.7	23800.8	59015.1	55354.8	57226.2	64204.3	37652.5	73252	27395.4	31113.9	30050.7	34544.2	31177.6	115797	114337	118450	118529	123871	5464.97	5864.63	5310.6	6814.23	5156.71	216623	244133	262291	272815	251854	279581	252462	250653	259109	250233
HILIC-neg	20.19	N-Acetyl-α-D-glucosamine 1-phosphate	NA	NA	C04501	C8 H16 N O9 P	301.055	26	26	490001	441917	709241	286192	232061	769154	958571	706271	489022	1.81562e+06	43614.3	52717.5	47760.7	58559.5	253400	362631	28743.8	472906	8187.67	7861.09	304764	290908	277799	230224	255560	7986.7	17922.5	174464	169996	177827	397264	745885	79376.6	490144	601500	53095.2	618759	376393	734880	642234
HILIC-neg	16.05	Succinic acid	HMDB0000254	1110	C00042	C4 H6 O4	118.025	22	22	9.36833e+06	1.0635e+07	1.16374e+07	1.17887e+07	9.18208e+06	2.07868e+07	1.90126e+07	2.2606e+07	1.78358e+07	1.68468e+07	2.1603e+07	2.46575e+07	2.35636e+07	2.45539e+07	1.66082e+07	2.89262e+07	3.18554e+07	3.22066e+07	3.21507e+07	2.1497e+07	1.13924e+07	2.03984e+07	1.95642e+07	1.56487e+07	1.62262e+07	1.77354e+07	2.03697e+07	1.63853e+07	1.68762e+07	1.42943e+07	2.77423e+07	3.06415e+07	3.34774e+07	2.66741e+07	2.36561e+07	2.4617e+07	2.84672e+07	2.36254e+07	2.60096e+07	2.33082e+07
HILIC-neg	1.221	Tridecylic acid	HMDB0000910	12530	C17076	C13 H26 O2	214.192	16	14	68943.7	66411.4	67749.2	55013.1	67552.1	64939.8	76699	73766.8	56593.3	65875.6	39173.8	40557.1	44783.2	43039.8	46269.5	40517.8	50981.8	37176.5	29236.4	27410.5	42562.2	44133.3	47885.2	34906.1	46769.8	50146.3	70398.4	60645.1	56009.1	50839.9	41068.2	44172.9	62031.3	50497.7	59530.9	53032.3	62013.5	57319	45341.5	50565.9
HILIC-neg	4.47	Uridine	HMDB0000296	6029	C00299	C9 H12 N2 O6	244.069	13	9	1.01281e+07	1.25067e+07	9.80689e+06	1.08471e+07	9.07249e+06	1.48793e+07	1.79059e+07	1.92736e+07	1.83622e+07	1.89785e+07	2.09225e+07	1.82166e+07	2.0546e+07	1.94028e+07	2.0265e+07	1.43801e+07	1.76241e+07	1.6591e+07	1.44713e+07	1.433e+07	1.38725e+07	1.25746e+07	1.43256e+07	1.25685e+07	1.19474e+07	1.1986e+07	1.17341e+07	1.04873e+07	1.02361e+07	9.94362e+06	1.5042e+07	1.64177e+07	1.66308e+07	1.65606e+07	1.66921e+07	2.07935e+07	1.63225e+07	1.49372e+07	1.68318e+07	1.6158e+07
HILIC-neg	19.217	Uridine monophosphate (UMP)	HMDB0000288	6030	C00105	C9 H13 N2 O9 P	324.035	15	10	271188	251736	258589	325324	263120	144693	128225	166519	158569	142655	45389.7	106599	86148.9	116107	110280	43496.4	138059	106654	99366.9	120210	87807.3	65474.2	79651.8	93075	97639.9	43395.6	52854.7	47885.6	41917.6	55638	136199	128813	152681	174079	134860	153870	122982	131593	146541	153353
HILIC-neg	1.15	α-Eleostearic acid	NA	5281115	C08315	C18 H30 O2	278.224	12	3	1.18044e+06	1.29112e+06	1.33517e+06	1.34036e+06	1.228e+06	3.52808e+06	3.79319e+06	3.76459e+06	3.47217e+06	3.66259e+06	2.30538e+06	2.08743e+06	2.07866e+06	2.12218e+06	2.30072e+06	1.20643e+06	1.38353e+06	1.24149e+06	1.17024e+06	1.23819e+06	1.20782e+06	1.27914e+06	1.22288e+06	1.3116e+06	1.21079e+06	814077	904317	885274	840490	820767	2.05794e+06	2.06969e+06	2.16709e+06	2.17883e+06	2.1095e+06	2.06208e+06	2.03924e+06	2.07177e+06	2.12498e+06	2.06275e+06
GCMS	35.89	1-kestose	HMDB0011729	440080	C03661		146			5013298	5174254	5633523	6363471	7045595	5075924	4976288	6402853	7114015	6785945	10075000	8763168	11178050	9395394	12420940	11870220	11450120	12372440	13522930	15674940	12687500	13229100	15136930	13430150	14863620	9413868	9427464	9233790	10175120	9976571	3178926	6209209	7342112	10355570	9946860	12942220	10620820	12471750	10284050	12518650
GCMS	20.88	2,4-diaminobutyric acid	HMDB0002362	470	NA		174			3026221	3523160	2424374	2785478	3121863	2876709	2507294	26702.5	2420436	1998693	2258985	2359087	2346593	2016516	2473325	1852312	1691857	1529334	1318516	1258780	1185936	1367682	1346557	872946	865626	909875	769168	982909	854505	1019143	1838549	2419751	2149959	2863762	2364786	2937358	1855888	2132666	1841459	2126529
GCMS	7.82	2-Hydroxy-2-methylbutanoic acid	HMDB0001987	95433	NA		145			6176785	6441130	4907782	5626020	6241393	8983546	7524364	6863747	7709144	6569640	5940515	5119954	6789548	4724264	6441833	1455551	1224490	1132391	1378541	991966	987173	1033686	1045491	1089629	796291	196691	181276	210248	211319	213286	3403965	5159487	5180580	5709847	4887027	5480546	3477358	4117902	3770063	5019660
GCMS	9.53	2-Hydroxyhexanoic acid	HMDB0001624	99824	NA		159			627964	719825	490826	591963	668954	1014715	793450	714236	834350	675658	572018	509065	634895	440010	575281	209989	141843	147562	175836	127466	191117	190982	181187	172215	136874	42096.2	35607.9	31010	73389.1	63129.4	334824	500269	499861	616685	501064	587420	384574	409242	376712	499560
GCMS	11.7	2-Methylglyceric acid	HMDB0002601	560781	NA		219			323262	444139	228641	344023	300068	676351	541333	379473	491307	307103	307446	393921	301924	221040	318721	226616	179556	162985	124490	127084	142227	122414	101329	90792.5	91008.4	310154	255042	379366	265799	366422	336872	453221	518779	534355	406130	505743	255834	299012	244682	278228
GCMS	22.04	3,6-Anhydro-D-galactose	NA	NA	C06474		231			1836998	1495872	1306953	1478038	1633644	717416	787087	593421	639705	563030	693038	525540	681425	563209	571643	367213	346906	269746	279217	247692	292618	320852	331616	221969	210982	105847	96065	141308	138574	169914	387827	562239	470379	583471	506550	631790	403070	491881	376421	466816
GCMS	7.7	3-Hydroxybutyric acid	HMDB0000357	441	C01089		233			144853	144252	107087	136124	141373	126431	107677	86667.2	116394	106361	155630	133456	180417	121567	166615	273894	242694	225490	261808	206372	172130	188565	205981	214264	171176	54985.2	58575.4	71390	88062.6	91411.2	129808	210228	204753	210265	189435	221953	138812	161656	163117	208579
GCMS	9.47	4-Hydroxybutyric acid	HMDB0000710	10413	C00989		147			6369118	9627280	9318195	12008320	14960950	5503900	6797708	7080416	9842410	8169366	4315796	5443525	11139990	6115762	9977189	5419641	5593611	6214115	9935732	6502103	4831356	8198713	8500986	10486780	7150563	4554967	7260786	7687733	10192160	9800428	2432230	3742681	4167203	5426722	4548079	7267072	6669220	8157501	9948725	12042390
GCMS	19.14	4-Hydroxyphenylacetic acid	HMDB0000020	127	C00642		232			1996863	2359973	1517550	1707054	2031902	1371954	1215136	1043679	1219832	846457	706320	600746	694735	569805	669310	368901	339574	298604	258660	233766	180400	221273	220012	162522	140849	110793	94545.6	127337	99175.9	119849	653381	969244	948592	1172976	969509	1139256	680727	810189	662400	812201
GCMS	24	Adenine	HMDB0000034	190	C00147		264			66888560	74686480	55759330	59072560	64620850	61007300	60578730	53699640	55221370	50195960	154730800	148388700	136632300	128400600	148980700	185409400	178551800	170396500	140581900	136381900	135349000	154912300	159544900	109675900	108684500	88244450	83711060	111337600	88393460	114185800	102877800	131253200	127586400	141190600	124818300	154273200	104233800	124706300	95010190	122077200
GCMS	15.41	Aminomalonate	HMDB0001147	100714	C00872		200			1611056	2711549	3365943	3524638	4119057	1980827	3373402	3725433	4420792	4039283	1243154	2527828	3476325	2444480	3239590	1721059	2626596	2465534	3615577	2856603	2097062	2825534	3234973	4381080	3134144	2858823	3257361	4806560	5326969	6147901	702502	981198	872588	1753974	1334013	2476100	3448753	3525454	4051092	4481341
GCMS	21.52	Arabitol	HMDB0000568	827	C01904		147			6691637	9952028	5902080	7101137	8205983	6821822	6330230	5349960	6631941	4972518	6517932	6504939	6943215	6095044	7068181	7117685	6749353	6243968	5604931	5192109	6380048	7746542	7965671	5369469	5104781	4977805	4635742	6262179	5038077	6696378	5784632	8053858	7250650	9536876	7558690	10259140	6812547	7556759	6249912	7516472
GCMS	14.22	Beta alanine	HMDB0000056	239	C00099		174			18760840	20847220	15417700	17503390	17733310	12985100	11281930	9740124	11222240	8336072	13461800	12474160	12707900	10991830	13143830	4349962	3604690	3157246	2943345	2528004	5124808	5519820	5478645	4091254	3663692	3856539	2887851	4087274	3210568	4048065	7973043	11326300	10859400	12711050	10657370	12868460	8294089	9550044	7670235	9615021
GCMS	35.97	Beta-sitosterol	HMDB0000852	222284	C01753		129			374670	270594	290450	647048	580980	225512	415480	555998	343156	198162	382360	616882	835262	456067	655026	1049613	1026875	1557053	1485898	1259455	2282021	3699653	3263304	3070997	2806204	4169885	5290807	4473065	4584694	4289514	929781	1106389	1248605	1255938	1323896	1640421	1362598	1908868	1755270	3054940
GCMS	17.39	Cysteine	HMDB0000574	5862	C00097		220			4791747	7768909	4642500	3937076	5240454	12496210	15475930	14794710	12199220	14967060	8502948	18019130	11978240	9248166	13493160	24363940	25982920	15957200	13373250	17472570	24827900	22324810	25913030	11530760	18678760	36190820	15623800	34200580	28234550	24873620	28514580	22399040	22209940	29963100	22151850	26587580	15254000	18823880	10180330	12142650
GCMS	32.08	Cystine	HMDB0000192	67678	C00491		204			518461	494034	448656	496817	496636	1178388	1058612	1005825	847988	1046223	248502	382068	298237	286620	35291.4	314438	275835	326145	282751	265249	237037	219579	229995	193802	211847	232161	227492	236054	25842.2	332925	317435	482163	42582.4	547351	544758	585466	440273	621901	397950	620466
GCMS	24.71	Fructose	HMDB0000660	439709	C02336		158			2530452	2925861	2356927	2254193	3105276	2271432	2960707	1986620	1051512	2635364	1056797	1578947	1462666	1011228	2190125	950930	823239	1195492	1406170	1520176	1739097	1378239	646922	1258606	1102747	3547354	3581945	3896984	3866658	4321346	2620490	647349	2205853	1074569	2196048	1208838	1374749	2092698	1899044	3354234
GCMS	32.34	Fructose-1-phosphate	HMDB0001076	10400369	C01094		299			418730	409315	504725	662082	516819	252797	256105	257999	163468	471681	179302	280902	288000	269701	268315	113305	143196	234231	172995	120892	122701	25381.8	95213.4	23835.5	76737.8	129242	112827	94863.6	118082	113985	115914	139753	169305	197008	200501	212398	143046	309451	219928	387894
GCMS	32.45	Fructose-6-phosphate	HMDB0000124	69507	C00085		73			156951500	140859500	114678800	120297800	124422300	109185500	109615100	113728400	111600100	126995000	66117440	74122240	69242900	69377240	79125440	33085940	32153170	39711250	27368240	24486360	23341190	21016720	22759700	26215400	24699190	10870140	10690230	11714180	14458630	15235730	59412050	74811310	72851660	75077690	76147580	84792340	63692920	86981140	62058160	94457540
GCMS	12.23	Fumaric acid	HMDB0000134	444972	C00122		245			39577800	43448520	29406570	37178610	35225340	65059960	63286260	56461020	58794870	44586380	23911650	28593100	38339170	33261180	28769050	27206970	25767850	20109650	22870310	18906510	16031810	20722310	21885290	17534680	15035190	8420981	7994662	11202850	9405195	12089420	58115210	77431640	72897070	86600660	76367700	93209430	56165520	56974280	55915120	60480670
GCMS	33.92	Galactinol	HMDB05826	NA	C01235		204			23002580	21511620	23073060	24588260	26346020	13154570	13432670	9664462	9364494	14047710	16475940	14901570	15696490	15399550	17242120	18200130	19093320	19582490	19043570	20739520	18822630	20033330	20807360	17647210	20123230	2935624	12076090	13162110	12698500	13386290	4730176	8546875	8545992	8729834	8527770	16836780	14656240	9905052	7684966	9935271
GCMS	25.51	Galactose	HMDB0000143	439357	C00984		73			1050985000	1064508000	1026200000	1057705000	1031775000	1040252000	1020668000	984900300	1044057000	1052770000	863756500	856411400	962544200	876185000	903863700	778771500	742659000	719414000	749806500	707183900	701444800	746318100	784044700	674759600	673360100	34172600	32505200	39938090	45157480	613062100	856793500	899703200	870015200	940136400	908232800	976214900	887613700	959229400	925208100	993881300
GCMS	32.95	Galactose-6-phosphate	NA	NA	C01113		204			4755369	6371883	227494	5100641	4205807	10369060	113764	15622470	9137716	9003131	9958971	12914050	6857617	6922422	12819160	3092085	3005594	6031378	4218404	3971058	3091706	3394711	2075759	3701249	3361040	4735747	5365083	5296947	3478885	3481276	9853962	9222376	20134880	14512470	12271260	11912860	10601190	11347630	10079600	12706360
GCMS	24.77	Gluconic acid lactone	HMDB0000150	7027	C00198		73			966775300	966172200	961581600	972274200	982912100	957371600	966968800	929499300	951414000	975211600	7549320	9600072	8855926	7846510	10053120	60765070	45323540	49837510	39456600	38495270	52717980	50483120	54231550	41690840	42228480	63657740	57988290	74686660	93103340	122653400	30800040	37491230	31719520	39766960	34435040	42770480	30295270	35919010	30417250	36957780
GCMS	14	Glutaric acid	HMDB0000661	743	C00489		234			613151	413140	474389	539204	1184618	604877	480960	205935	434723	245906	2739133	801805	1166678	982855	952353	364100	289259	290004	480514	345310	333053	1407930	416649	294500	216745	371054	412448	693278	487088	779886	314897	1251333	559089	575045	742024	562521	383201	492464	523466	622768
GCMS	12.02	Glyceric acid	HMDB0000139	439194	C00258		189			618111	596005	415374	532893	558487	773578	731771	544663	635354	518075	1141919	1026161	1055461	866536	1044968	908899	666236	618977	587462	483145	703830	718108	619101	583927	450090	600981	481591	669071	616950	733330	617193	892611	847372	989615	836314	1010462	619739	737550	624729	770342
[truncated: 47 more rows]
[truncated: 1 more columns]

## Sheet: Sheet3
	24h	24h	24h	48h	48h	48h	72h	72h	72h	96h	96h	96h	144h	144h	144h	168h	168h	168h	216h	216h	216h	QC	QC	QC	QC	QC	QC	QC
	Sample	Sample	Sample	Sample	Sample	Sample	Sample	Sample	Sample	Sample	Sample	Sample	Sample	Sample	Sample	Sample	Sample	Sample	Sample	Sample	Sample	Sample	Sample	Sample	Sample	Sample	Sample	Sample
[truncated: 479 more rows]

## Sheet: Sheet4
Query	Seed ortholog	e-value	score	best tax lvl	Preferred_name	GO terms	EC number	KEGG KO	KEGG pathway	KEGG module	KEGG reaction	KEGG rclass	BRITE	KEGG TC	CAZy	BiGG reaction	annot lvl	matching OGs	Best OG	COG cat	description
[truncated: 9,191 more rows]

[truncated: 1 more sheets: ReadMe]
