# Supplementary material for: Time-resolved multi-omics analysis reveals the role of nutrient stress-induced resource reallocation for TAG accumulation in oleaginous fungus Mortierella alpina
Source: Biotechnol Biofuels. 2020 Jul 1;13:116. doi: 10.1186/s13068-020-01757-1 (PMC7328260; doi:10.1186/s13068-020-01757-1)
Supplement: Supplementary file 3 — Additional file 3. MEBA analysis for time-resolved metabolomics and proteomics datasets. [file 13068_2020_1757_MOESM3_ESM.xlsx]

## Sheet: Sheet1
Protein ID	HotellingT2	24h_2	24h_3	24h_4	48h_2	48h_3	48h_4	96h_1	96h_2	96h_4	144h_1	144h_2	144h_4	168h_1	168h_3	168h_4	216h_1	216h_2	216h_3
MA-00139-22	1824.27	34.6629	34.809	34.2048	32.2619	31.9239	32.3093	26.1637	26.901	26.3994	25.2941	25.8507	25.4082	25.6131	20.9579	22.6809	26.6487	22.6172	25.2351
MA-00297-34	1628.62	32.2665	32.3233	31.7283	31.5527	31.1552	31.5892	24.5267	24.9198	22.7532	25.3192	24.8086	24.1688	24.7174	24.5507	25.013	21.9343	23.9149	22.254
MA-00112-345	1174.65	30.6143	30.7588	30.2914	29.19	29.0552	29.7174	23.1011	24.4153	24.1546	23.7122	24.8086	23.3592	24.8916	24.5507	24.0103	24.3621	22.9215	24.834
MA-00101-248	1049.49	31.2643	31.5373	30.9173	28.9591	28.2796	29.0515	23.2833	24.5596	24.1546	21.8923	23.1234	23.6387	24.8916	21.6065	23.7641	24.6879	24.8889	24.6986
MA-00190-12	1041.36	35.0389	35.212	34.6787	32.6184	32.3165	32.7368	26.9612	25.8368	26.3972	27.4697	25.4261	25.794	25.5624	22.4367	25.614	24.9131	25.6679	27.3254
MA-00213-330	1035.48	30.5834	30.9055	30.4702	30.6925	30.0571	30.4187	25.3151	25.5486	25.9475	26.2791	23.8573	23.6904	24.8132	22.8784	23.0408	24.7397	26.1935	25.7197
MA-00035-1	1026.06	31.5068	31.8905	31.3275	29.2923	29.3648	29.0266	26.3586	23.725	19.1846	24.7818	23.257	24.8865	23.5465	25.2589	26.7471	24.8311	22.9415	27.1978
MA-00162-340	1022.61	30.322	30.4841	30.0074	30.3413	29.9786	30.1635	27.3625	27.0499	27.3929	25.0098	24.6578	23.8958	24.6489	24.8216	25.6637	24.0645	23.1869	23.5083
MA-00067-169	906.19	32.2941	32.3575	31.8197	31.291	30.8684	31.1697	26.8147	26.994	25.6667	26.1568	25.7647	26.9033	26.9015	26.5992	25.2324	25.9579	22.6334	26.806
MA-00182-280	900.101	29.7748	29.862	29.5379	28.6167	28.4523	29.0935	25.2001	25.3183	24.113	22.3069	23.7485	24.174	23.2611	23.4969	24.6511	22.0358	22.2636	22.8457
MA-00120-278	863.932	27.2731	27.5756	28.1145	28.8731	28.9496	28.7005	31.9515	32.2146	32.2824	33.5412	33.6198	33.3828	33.6415	34.043	33.8515	32.7327	32.351	33.4083
MA-00073-621	841.448	30.4444	30.4777	30.1224	29.2365	29.2083	29.2178	26.5221	24.1602	24.1546	26.0785	22.9471	25.3512	24.498	22.5149	25.3868	22.6686	23.7127	23.3301
MA-00112-277	794.12	30.0835	30.4969	29.9276	30.2356	30.2038	30.3233	27.2285	27.3534	26.5942	24.3458	26.0444	23.6838	27.1481	25.799	25.2226	24.3086	23.358	27.1003
MA-00184-562	764.905	30.5565	30.4135	30.0856	28.3758	28.6204	28.4662	23.8596	24.5198	22.6973	24.5261	21.8235	24.1688	24.8916	20.6908	25.1765	23.3745	20.3391	23.6339
MA-00139-75	732.201	30.4408	30.812	30.1908	30.5954	30.4752	30.7858	28.0371	28.524	28.6493	27.0451	26.8446	27.1947	25.4205	25.7063	25.292	23.9406	22.9749	24.7077
MA-00334-260	664.454	30.1394	30.1511	29.7783	29.1911	29.2687	29.0894	26.4799	26.3642	26.6761	24.7836	25.393	24.7046	24.809	24.701	24.0542	25.1973	24.0802	23.0081
MA-00112-174	635.427	24.3989	24.5936	24.3735	25.8382	25.1185	25.1075	25.3386	26.2787	25.1101	28.9281	28.896	29.0676	29.8473	29.7932	29.7213	29.8105	29.9676	30.3354
MA-00270-87	634.097	24.7998	24.7963	22.6228	23.0757	24.2142	26.0273	28.4203	28.4128	29.0641	29.3319	29.2098	29.4327	29.1459	29.2202	28.9548	28.5368	28.9497	29.4721
MA-00326-91	633.417	29.3704	29.3162	29.0088	27.2924	25.7254	27.8566	22.9743	26.6818	24.8439	24.3743	23.1107	24.6982	25.2556	22.0517	22.7162	23.8869	22.7475	25.2076
MA-00055-17	614.785	28.6623	29.0675	29.0458	27.8727	27.5028	27.7221	22.7864	24.4328	23.9313	24.5945	19.7418	23.6387	24.8916	24.4457	24.2631	24.3961	24.8889	24.6986
MA-00139-392	612.361	23.3358	24.305	23.555	26.2005	24.8815	26.2618	28.8787	29.1757	28.4992	29.9296	29.1889	29.3003	30.2708	29.2737	29.2375	30.205	29.5291	30.4159
MA-00213-516	590.347	33.9505	34.1146	33.7353	34.2479	34.0832	34.4396	32.3663	32.6107	32.5605	29.8254	29.1929	29.4746	30.341	30.2609	29.7315	29.4775	29.7846	29.9056
MA-00139-371	572.091	28.8437	28.8152	28.3426	28.0046	28.0493	28.2353	25.6737	26.5039	26.1921	24.6449	23.0425	24.4472	23.9995	24.6271	24.5989	24.0765	23.713	22.668
MA-00090-276	560.528	35.809	36.0184	35.4853	35.4272	35.2654	35.4519	32.9064	33.1312	32.9231	31.9949	32.1028	32.0769	31.6202	31.5903	31.3008	30.3798	30.522	30.693
MA-00090-467	559.371	28.5223	27.9972	28.2097	28.1262	27.8054	27.4748	25.642	25.1572	23.845	24.6875	21.608	23.6591	23.8556	22.8777	24.4133	21.3159	24.7442	23.4018
MA-00090-252	555.332	24.0706	26.0225	23.65	26.1114	25.6486	26.1633	28.8914	29.377	29.5046	29.7662	29.6146	29.4732	30.2486	30.2709	29.8705	30.3724	30.2865	30.5836
MA-00120-147	554.209	30.1442	30.9229	29.9781	30.0245	29.9677	30.0497	27.9065	27.6489	27.5396	26.2531	26.22	26.9218	26.7371	25.8865	27.3801	24.9288	25.6698	24.1232
MA-00072-26	549.223	31.377	31.4365	31.0767	31.1513	30.6043	30.933	27.5994	27.4546	26.9864	25.287	26.2116	25.6416	24.818	26.0711	24.7308	26.0648	26.193	26.9451
MA-00326-43	538.686	30.3763	30.4556	30.0883	30.1438	29.823	30.0609	28.1742	27.6434	28.3791	26.6772	26.3135	26.8223	25.5294	25.3323	26.4893	24.2669	26.7461	21.3996
MA-00101-594	526.266	28.6841	29.2704	28.5464	28.3943	27.898	28.3363	24.9333	24.8392	25.597	24.1483	24.4551	26.0791	22.8803	26.1359	22.4859	24.1682	23.9847	22.6428
MA-00153-253	513.994	29.5207	29.667	29.1576	28.9218	29.0566	28.6299	26.5626	26.8509	26.6141	25.2298	25.2951	26.0315	25.7112	23.8107	25.6698	24.6224	25.4883	23.2919
MA-00241-2	513.027	28.2595	28.507	28.0366	27.8841	27.5722	27.7648	24.4937	24.5596	20.1947	23.5418	24.5299	23.3578	22.6082	22.91	22.2347	22.7831	24.8889	24.1737
MA-00055-151	511.438	25.6594	25.17	25.2346	24.6808	26.0329	25.8252	26.1203	26.9998	27.8188	29.4195	29.3151	29.439	29.7056	29.8965	29.6246	29.526	29.5327	29.7007
MA-00139-262	494.698	23.7597	25.0424	23.3519	24.7173	22.7217	26.2613	26.9277	28.7993	28.0143	27.7466	27.808	28.0971	28.3511	28.1331	28.6024	28.1417	28.0663	29.3635
MA-00090-466	494.335	26.968	26.949	26.8219	27.9558	27.8735	29.1417	29.94	30.4996	30.0253	31.1034	31.0527	31.2498	31.4871	31.6032	31.892	31.5757	31.5589	31.9228
MA-00182-133	480.841	28.5296	28.338	28.0101	27.8457	27.6526	28.2093	23.6644	22.6596	24.0459	24.6009	24.9985	23.6387	25.3177	24.4457	22.482	24.6879	24.8889	24.6986
MA-00182-165	463.375	27.9759	28.1486	28.1338	27.818	27.9528	28.3155	24.3443	24.5596	23.3973	23.9068	24.8086	24.1688	23.9595	24.43	25.0391	24.0109	23.9799	24.834
MA-00213-142	455.289	28.7326	29.0028	27.7633	28.4097	27.8711	27.4397	22.0256	23.2227	24.1546	23.1757	24.5804	23.6387	24.498	24.4457	23.2684	24.6879	25.45	23.0799
MA-00173-19	451.674	24.7076	25.8749	26.4795	25.2575	25.3141	25.0531	25.3571	24.1661	26.0712	28.6723	28.1319	28.1819	29.1437	28.861	29.0991	29.2836	29.4427	29.7313
MA-00090-351	445.239	30.9131	30.8807	30.6073	26.2723	30.1636	26.0731	23.4626	25.617	25.5051	24.3875	23.9539	25.212	24.6406	24.2168	25.7715	24.4552	26.3688	24.702
MA-00101-44	442.924	25.1575	26.2782	25.8204	26.3931	27.3843	26.6232	29.7245	30.3464	30.1234	31.386	31.4201	31.4654	31.4657	31.4337	31.6415	32.0128	30.881	31.8308
MA-00090-352	439.784	31.0619	31.3691	30.7845	30.9976	30.5533	31.1052	28.6776	28.8956	28.6286	27.5324	28.0037	27.9356	27.6116	27.0918	27.1338	26.6192	25.844	26.6327
MA-00210-134	438.406	26.3394	26.2034	26.5832	28.6134	27.7421	28.5353	30.3214	30.5823	30.6198	31.1588	31.1358	31.2887	31.3154	31.2433	31.2477	30.8272	31.0217	31.0833
MA-00323-2	434.093	23.2922	26.2971	26.7371	25.9206	23.412	23.4428	22.5238	27.0359	26.2408	29.1037	28.4488	28.458	28.6988	28.3323	28.2102	27.7914	27.1405	28.3082
MA-00320-157	430.229	24.6285	24.7317	26.7445	24.5	22.197	24.4565	26.1477	25.7159	23.4559	27.6933	28.4089	28.2623	28.6999	28.8188	27.1223	29.8368	29.5623	30.1011
MA-00268-179	426.981	28.7738	29.0056	28.4605	28.0754	27.7982	28.547	25.386	25.8592	25.7564	24.4473	25.1274	24.1625	24.4774	24.0788	23.8141	24.8304	25.3577	24.7577
MA-00270-209	412.683	28.56	25.9447	28.4448	24.3913	25.3088	25.8738	29.1001	29.4275	29.2669	29.5673	29.9044	30.0979	30.4781	30.3475	30.5552	31.4262	32.0139	31.7927
MA-00101-559	412.376	27.1424	26.5008	24.8528	26.8509	27.217	27.7294	25.9012	24.7812	27.1057	25.1372	26.5245	25.6725	26.8126	26.1905	26.6486	20.9504	21.6363	22.179
MA-00120-365	404.386	28.9841	29.4394	29.178	28.651	28.9063	29.2524	26.2981	26.3681	26.7268	24.3683	23.8432	24.6712	25.6719	23.9963	25.6637	24.9745	25.4105	25.2136
MA-00334-436	393.985	26.3802	26.5334	26.2886	25.8415	26.8564	26.062	21.5739	21.7617	22.0969	21.4329	20.4228	21.7032	21.6841	21.2399	22.3925	22.97	19.693	23.0391
MA-00268-193	390.53	28.0604	28.2309	28.0699	28.498	28.3396	28.9805	27.2521	27.5617	28.0044	22.5562	25.8644	24.374	25.4826	24.2706	26.1412	25.0294	25.3344	23.2731
MA-00090-522	390.478	27.2477	28.2715	27.6695	26.0332	26.6934	26.7907	22.3515	23.9626	23.6678	24.1326	23.63	23.5334	23.9583	22.4709	21.112	23.8939	23.8937	23.7592
MA-00072-191	388.993	24.6433	22.9129	28.0035	25.8702	25.7082	26.0056	20.983	21.6392	22.5888	23.5839	22.6673	25.0221	25.3278	24.8345	24.6646	28.4533	27.7455	28.7941
MA-00139-331	386.986	30.0371	29.9129	29.6328	29.8969	29.5533	29.9351	27.6518	27.711	27.5843	26.0811	26.2941	26.294	26.6273	26.1082	25.6791	25.0583	26.2861	25.7349
MA-00090-17	373.752	32.3274	32.4937	32.0654	32.3737	31.9272	32.3452	30.318	30.6063	30.3208	29.6216	29.3841	29.2718	29.0002	28.5451	28.873	27.2796	27.1557	28.1683
MA-00184-187	365.27	27.7793	26.8949	27.3289	28.0195	27.7401	28.14	26.0984	26.9028	26.3399	24.8862	22.6883	24.1356	24.4863	25.7128	23.7106	24.0253	23.7657	24.1264
MA-00072-311	361.505	25.0338	25.4196	24.2097	25.6305	25.7545	25.964	28.6999	28.2644	29.0265	29.0317	29.1693	29.1602	29.5945	29.2535	28.7196	28.3688	27.9882	29.139
MA-00055-120	359.585	30.6862	31.0795	30.043	30.874	30.2162	30.6528	28.3813	29.3253	28.8798	28.1149	27.8926	27.4584	27.7077	28.1892	27.5865	26.0225	26.3282	26.0738
MA-00073-357	359.309	25.9403	25.5258	25.142	25.2619	23.735	25.3455	23.3156	25.5418	24.3063	26.8143	25.8279	25.8641	27.4825	28.1761	27.218	28.7857	28.7161	29.039
MA-00101-518	353.744	25.7239	26.2784	25.7302	25.6167	25.7033	27.0677	21.7213	20.9296	21.906	22.7304	24.8349	22.8692	23.7944	23.3222	23.5699	28.8536	21.5588	29.6711
MA-00153-479	343.35	24.7515	25.2735	24.5076	24.6218	24.5041	24.6065	26.3953	26.9266	26.8525	27.9022	27.614	27.1992	28.2927	28.0247	28.2454	28.2992	28.5671	28.7384
MA-00162-399	342.815	29.4345	29.5274	29.0008	29.2944	28.8017	28.856	26.8827	26.8503	24.9125	22.0943	25.7743	26.4095	26.9851	26.7492	25.7784	25.3727	24.3721	26.1967
MA-00120-150	342.029	27.8737	28.0237	27.6532	28.0497	27.1744	28.047	24.5117	25.0819	24.715	25.059	22.7409	21.8697	24.9634	24.2279	25.1765	24.6879	24.8889	24.6986
MA-00139-252	341.869	31.1872	31.2436	30.8521	31.0958	30.8524	31.1604	28.637	29.2669	29.062	28.067	28.3605	28.5341	27.8959	28.1653	27.6095	26.7137	25.7071	27.336
MA-00073-461	334.577	29.8143	29.2144	21.5148	27.5941	29.2977	30.5837	25.2679	24.971	29.1522	28.9087	28.6823	28.9834	28.8129	30.0104	28.4935	24.2038	23.7595	23.4228
MA-00073-118	333.205	28.8189	29.3038	28.7749	27.7019	27.8311	28.5662	25.1322	25.6803	23.5279	25.4083	23.0639	26.1754	25.4813	26.1685	27.3171	27.9189	26.2199	27.9371
MA-00139-363	332.041	26.827	27.6579	26.0083	28.5622	27.1338	28.206	26.6581	27.0262	26.8953	24.5739	23.3357	23.4575	25.9693	25.1899	24.7412	22.359	24.2685	21.7533
MA-00213-175	330.425	31.9302	32.1903	31.7356	31.6794	31.4791	31.8609	29.6573	29.7031	29.758	28.2502	28.9633	29.153	28.3982	27.7373	28.3416	27.6758	27.7225	28.2199
MA-00120-577	328.087	27.8547	28.1916	27.4526	27.3345	26.5549	27.81	24.1306	25.1324	24.0891	23.3199	25.1485	23.0396	23.9276	23.4778	23.2468	26.9117	26.1149	26.9957
MA-00173-93	325.646	27.1226	27.4159	27.318	28.1552	27.5227	27.272	26.0412	26.4741	25.3468	24.6005	24.4746	22.3515	24.9673	24.62	24.1196	23.8484	23.8107	23.9036
MA-00090-348	323.824	27.5571	27.9768	27.3422	27.8904	27.7776	26.1039	26.2017	23.6174	25.8801	23.4705	23.0049	23.4737	23.9002	24.3268	24.6665	20.1704	25.0368	20.6605
MA-00073-10	321.759	25.9532	25.5361	23.2029	29.559	29.3314	29.5902	30.9677	31.1846	31.1432	32.5443	32.5597	32.4795	32.3531	32.7411	32.7318	32.4782	32.8135	32.8819
MA-00213-388	318.872	28.2025	27.552	26.7817	28.307	27.4775	28.5002	24.9031	25.7103	25.2297	22.8497	24.4873	24.619	28.0899	23.6825	24.1467	24.9646	24.6535	25.3223
MA-00270-120	318.303	26.5591	27.5943	26.9619	30.6707	30.2109	30.2838	30.8911	31.4234	31.0321	31.6627	31.6705	31.7413	32.1284	31.967	31.6793	31.5279	31.5591	31.9153
MA-00297-273	317.692	24.5383	24.7684	24.4878	27.2613	27.2314	27.5772	28.2697	28.7034	28.6516	28.7715	28.8023	28.2571	28.6394	28.7107	28.928	27.5944	28.5052	27.6373
MA-00326-162	315.946	31.3728	31.5446	30.947	31.0384	31.0658	31.2929	29.4966	29.1011	29.1419	28.0926	28.2371	28.2691	28.524	28.6734	28.6142	27.4094	27.4859	27.2593
MA-00334-557	315.929	28.2474	28.3298	27.663	26.1241	26.4076	26.6644	24.7179	24.9502	24.553	22.613	23.63	23.7344	22.0256	22.6359	23.0516	21.0253	21.8837	23.7592
MA-00297-55	313.944	28.0428	27.2314	24.4408	26.0417	26.6826	27.9692	22.491	22.5263	24.4472	23.5948	24.2983	23.5271	23.9004	23.7006	23.4518	23.8937	23.4952	23.7223
MA-00153-218	312.86	24.5914	25.2282	24.4062	24.5674	23.9557	23.2548	23.9723	23.6931	23.8884	21.9205	22.3135	20.2034	20.9809	20.614	20.9013	21.843	20.551	24.9407
MA-00014-1	311.701	25.5132	24.9411	25.0946	25.9691	25.7995	26.0091	24.882	25.5265	25.2593	28.0664	27.7041	28.2645	28.5065	29.1186	28.4239	27.7305	28.6683	28.511
MA-00112-270	307.23	22.8054	24.1355	25.744	25.8414	23.6456	25.2782	26.607	26.015	26.5205	27.3502	26.4505	29.2389	26.4338	28.2392	28.5433	28.0288	28.7399	28.1098
MA-00162-360	306.813	26.5658	27.6709	26.7117	27.5101	27.1113	27.1805	24.9896	26.3815	24.865	24.2562	23.3827	24.6537	23.0963	24.4324	23.4307	25.9928	25.1793	22.3394
MA-00153-326	305.896	29.6018	29.8637	29.291	29.1115	29.0354	29.6143	27.0755	28.4179	27.9766	26.5526	27.4546	27.4253	28.2375	27.4914	27.6242	23.7942	23.4994	21.5308
MA-00326-155	305.757	27.3993	27.6542	27.4667	24.7445	26.1583	27.2113	25.5531	25.8022	24.8547	24.506	22.8979	24.3286	22.5255	24.2334	23.7822	24.4869	23.8112	23.3335
MA-00139-358	304.76	27.1667	26.1734	27.035	28.3503	27.7934	27.8126	28.7716	29.4849	29.1133	30.7242	30.8234	31.0735	31.0859	30.8318	30.7359	30.444	30.5041	30.5095
MA-00153-228	302.829	29.9117	30.0221	29.8362	29.6029	28.9299	29.5152	28.2807	28.1747	27.9963	26.5143	26.8624	26.7365	26.4813	26.9708	26.718	26.1725	25.6112	26.1792
MA-00153-455	302.488	28.2767	28.4193	27.9229	28.4561	28.4689	28.5293	25.1411	26.0095	26.0665	22.5382	25.65	23.7038	25.4169	25.0126	25.2227	24.8304	25.3577	22.0166
MA-00153-34	301.719	28.3921	28.541	28.3832	26.7567	27.2612	28.0117	25.2875	25.1789	24.584	22.984	24.3806	23.3953	24.7623	24.826	24.0943	23.5109	24.715	24.5371
MA-00334-474	300.74	31.0054	30.8232	30.2425	30.5566	30.5819	30.8388	28.7357	28.6025	28.8667	27.5777	27.7672	27.7862	27.804	27.3382	27.3779	26.9795	27.1238	27.5356
MA-00067-147	298.658	29.3724	29.528	29.0245	28.8672	28.8499	29.195	26.8463	27.5275	27.3845	26.5362	26.221	25.9506	24.8216	26.8812	23.7096	26.0067	25.5417	27.4263
MA-00334-124	297.439	26.3053	26.9077	26.53	27.5865	27.6028	27.803	28.8557	30.0038	29.6106	29.9246	30.2114	29.9673	30.4884	30.1903	29.9309	29.8934	30.438	30.3128
MA-00210-280	292.815	22.8382	21.6203	25.2443	21.233	24.8126	25.0388	24.4823	25.0855	25.319	27.5911	28.2606	28.1713	28.5311	28.296	28.6552	27.3404	26.6238	28.8544
MA-00073-505	292.346	27.7494	27.4537	26.9372	27.2635	26.9986	27.5464	25.2747	24.4328	24.0947	23.5452	22.928	21.9964	25.7833	23.8868	22.4584	24.6879	24.8889	25.2764
MA-00334-32	286.149	27.4195	28.2471	27.19	26.4018	27.6828	26.3138	23.2371	23.8604	23.4268	25.2153	24.5496	24.574	24.3902	24.8436	22.0893	24.3935	21.6361	24.7354
MA-00153-121	284.966	26.2477	27.5318	27.2369	28.0588	27.9346	28.5261	27.2101	27.2655	26.1799	23.991	24.3312	24.7389	23.7019	23.8469	24.8913	22.8937	21.8908	25.4365
MA-00182-312	278.804	27.5331	27.4462	25.3861	26.1734	25.6179	26.5139	24.5439	24.5539	24.0975	23.5063	23.2743	21.8223	22.3875	23.5007	23.4518	19.4176	24.1589	22.569
MA-00072-80	276.222	26.8028	27.4947	26.1916	26.0919	26.511	27.1318	23.1103	24.0713	23.9905	22.8316	23.9132	25.0252	24.0659	24.4037	23.1131	24.8199	23.5382	23.2755
MA-00139-335	274.569	27.4904	27.3723	27.2798	28.0639	27.864	28.7221	27.2454	28.0075	27.7436	26.7642	26.3721	27.1829	25.3918	26.2619	24.671	23.8402	23.3435	25.5721
MA-00210-262	273.239	27.1801	27.9445	27.2851	28.4557	27.9891	28.8365	29.4841	29.822	29.8244	30.6219	30.6617	31.1778	31.2086	30.9076	31.0721	30.6396	31.0189	31.54
MA-00210-180	269.937	30.0176	30.4438	29.8972	30.6456	30.6261	30.6536	30.7169	30.7849	30.8895	33.0777	33.3033	33.3169	33.2193	33.4083	33.4209	32.781	33.1863	33.3436
MA-00268-63	268.176	26.578	27.2519	26.0742	24.5779	24.7807	26.9698	23.4206	23.9147	24.2553	21.6595	23.2714	23.6135	23.7095	22.4468	23.7696	20.7706	23.9415	23.4789
MA-00270-25	265.194	27.2607	26.7226	26.5569	28.4632	28.4504	28.7278	30.1271	29.9946	30.0462	30.7317	31.0799	31.0004	30.8882	30.8751	31.0008	30.6613	31.3711	31.0916
MA-00326-21	262.466	29.7104	29.6324	29.1659	30.9548	30.9686	30.7096	32.2095	32.5435	32.4756	33.0958	33.2479	33.2479	33.4581	33.4083	33.2479	33.0338	33.2897	33.4823
MA-00213-639	260.359	28.8297	28.2705	26.433	29.8838	28.3492	26.3062	23.591	24.6949	28.8707	30.9426	23.1268	31.5705	31.082	23.3127	24.1288	31.0473	26.8033	31.6614
MA-00073-342	260.027	25.9168	24.8023	25.2602	25.1143	25.8399	25.8667	27.0981	27.1437	27.3114	28.2853	28.1063	27.8316	28.454	28.21	28.541	28.2538	28.5404	28.8632
MA-00101-271	259.586	26.2241	26.2442	25.4987	25.5008	25.9708	26.0298	23.3703	22.3669	25.4835	25.0744	21.8375	23.892	22.8573	26.2435	23.4978	21.4396	23.1773	21.462
MA-00326-113	257.855	29.6723	29.5788	29.6213	30.1319	29.6881	29.8595	27.5709	27.8839	28.3661	27.1759	27.52	27.4611	27.5384	26.4006	27.4057	25.7271	25.9538	26.1954
MA-00055-93	251.197	25.4228	24.9169	24.6069	26.4714	26.6903	26.484	26.601	26.3409	26.424	27.8637	28.2402	28.6492	29.0089	28.6518	28.7131	28.5844	28.7626	28.5059
MA-00184-448	250.47	24.7763	25.6433	21.6528	25.7845	25.5047	25.2382	23.9545	25.15	25.0993	24.4762	24.302	24.865	24.1342	24.1926	22.7548	21.4361	20.72	20.6159
MA-00297-198	245.96	23.3811	24.1703	22.9961	25.4095	24.8669	23.8872	22.5684	22.7561	20.6096	19.9721	23.0091	20.8892	20.1639	20.7524	21.1636	24.126	23.2992	18.5611
MA-00153-291	245.023	28.3533	28.8606	28.2983	25.7659	26.6465	27.0404	24.5174	24.6533	23.6993	24.143	23.9131	25.9283	26.0245	25.4999	24.6235	25.8293	25.3845	26.3723
MA-00090-251	240.502	23.1404	23.6427	24.4721	25.6557	25.2875	25.5813	26.6334	26.773	26.1185	25.7868	26.7438	26.8596	27.1962	27.5284	27.0058	28.3691	28.2778	28.6019
MA-00139-95	239.639	29.0658	29.3575	28.7438	28.9777	28.7186	29.0781	26.6034	26.6153	26.3995	26.7766	26.1612	25.6211	26.0621	26.0395	26.648	25.2218	26.6991	27.1889
MA-00189-78	237.901	26.941	29.0595	27.5371	27.5652	27.4572	27.3089	24.2054	27.3563	26.663	24.6216	26.484	25.9732	24.0499	26.5326	24.0649	23.3721	23.8474	25.0929
MA-00334-207	236	28.4483	28.3268	28.0969	28.3376	27.6118	28.2823	26.8293	26.6127	26.9431	26.5795	26.3068	26.4513	24.7421	25.1719	25.5447	24.9723	24.4713	24.8261
MA-00101-84	235.747	29.2541	29.596	29.2219	30.682	30.1762	30.5664	31.0024	31.5222	31.4184	32.7353	32.7888	32.7107	32.8796	32.4263	32.5665	32.2025	32.4013	32.4016
MA-00090-181	234.768	27.045	26.5707	24.2615	27.5441	27.7862	28.4282	29.4093	29.7547	29.598	30.2129	30.2886	30.4523	30.6414	30.3667	30.517	30.2923	30.1244	30.382
MA-00320-70	234.465	27.8258	28.4522	27.773	28.5552	27.8932	24.8401	27.2003	27.9126	27.9701	27.1136	26.6393	27.5946	27.6596	27.234	27.1972	24.2855	23.7363	22.9012
MA-00101-205	232.123	28.5297	30.1001	27.5956	28.0839	27.5722	27.8048	25.6967	25.442	25.2937	25.344	24.5839	24.8878	21.9267	24.3596	24.4568	24.8304	25.3577	24.7577
MA-00162-147	227.752	26.0341	24.1781	24.7547	25.2628	26.5609	25.1284	26.9124	27.1587	27.2071	28.9101	28.3135	29.0274	28.7012	28.4938	28.6698	28.6518	28.5842	28.7533
MA-00326-6	227.346	33.6839	33.9505	33.2759	33.7047	33.5062	33.8234	31.8674	32.1052	32.093	31.1529	31.2481	31.1844	31.2218	31.3343	31.1908	30.328	30.3724	30.5203
MA-00213-194	227.301	27.0883	27.3643	27.3123	26.9304	23.8446	27.2846	25.8611	26.4915	25.3473	27.4751	27.5333	28.3104	29.4526	29.6752	27.788	29.192	28.9496	29.7228
MA-00297-149	227.052	24.1053	24.0063	24.5147	25.4328	25.6495	26.0736	27.0771	24.8337	27.0691	27.7968	28.0782	27.7684	28.3412	28.0524	27.7088	27.7754	27.8622	28.1224
MA-00320-114	226.614	30.3262	30.6072	30.1444	29.6118	29.4053	30.0561	28.3017	27.8784	28.4788	26.5486	26.1226	27.3458	26.8934	27.685	27.2562	27.4188	27.8993	27.8448
MA-00101-550	224.546	27.5891	27.0632	27.0311	28.252	27.1514	27.669	24.8656	24.1861	23.3611	25.003	23.4157	27.0462	26.9133	26.6549	24.7518	26.0423	24.9266	24.0876
MA-00067-171	224.32	28.1903	28.56	28.1521	28.2521	27.8541	27.7725	23.4675	25.771	25.9813	24.6946	25.1332	24.4909	23.3601	24.9528	25.4192	26.4006	26.1352	26.5081
MA-00101-216	223.445	27.2431	28.1937	26.9841	26.5309	26.471	26.5309	24.3443	26.1055	21.6328	24.5945	24.5299	23.7849	23.5414	25.1798	24.7244	24.6879	24.8889	24.6986
MA-00297-190	222.38	22.7637	23.0272	22.3632	27.081	26.8546	25.7599	22.4043	22.9908	23.0691	24.2812	24.4706	25.6765	21.9102	22.03	23.5395	23.8689	23.2927	24.5096
MA-00072-21	222.288	31.4104	31.552	31.2292	30.7846	30.6304	30.7692	28.599	29.215	28.816	27.8367	28.1763	28.2726	27.6255	28.1982	28.1762	26.9457	27.2623	27.872
MA-00112-243	221.018	24.939	24.4093	24.71	24.9762	26.4549	24.801	27.3872	27.6683	27.8771	28.8793	26.737	28.6045	28.3255	28.4798	28.9321	25.886	27.5209	28.4745
MA-00334-426	219.218	27.5285	27.8002	27.2537	28.5266	27.5622	28.0572	29.3077	29.4278	29.6843	30.0103	29.8467	30.1518	30.7368	30.6043	30.2759	30.7555	30.9099	30.485
MA-00162-131	218.439	27.4494	27.3063	25.8168	28.0346	28.1062	28.5891	29.1298	29.5144	29.5457	30.5689	30.3184	30.275	30.508	30.7373	30.3359	30.1817	29.9754	30.5917
MA-00072-234	217.23	26.3407	26.5352	26.4445	28.3555	26.9018	27.7387	25.2572	25.591	24.9473	25.6769	25.7344	19.9591	24.9499	25.7981	24.1934	24.4999	22.6923	24.823
MA-00114-1	216.654	29.3554	29.1502	29.1009	29.4485	29.1655	29.4602	28.3791	28.2398	28.1768	27.6048	27.6523	27.0917	27.9264	27.706	27.9275	25.787	24.9384	25.0304
MA-00162-112	216.342	30.5696	30.5501	30.468	30.2218	30.2645	30.4438	29.042	29.5807	29.6209	28.3825	28.2573	28.3624	27.9259	27.9488	27.7811	27.2946	26.7029	27.382
MA-00120-561	214.905	29.072	29.4297	28.9235	30.0638	29.8936	30.2918	28.7472	29.6192	29.1439	28.1366	27.9032	28.405	27.7037	27.9417	27.8091	26.0774	25.6836	26.4451
MA-00189-29	214.29	25.5619	22.8089	24.9011	23.1988	23.9775	24.8063	26.2862	26.969	27.1662	27.53	27.7596	28.2262	28.0915	27.8454	27.6281	26.3083	27.1839	27.6233
MA-00173-221	214.091	25.1474	25.0492	22.1572	25.9515	24.8409	25.0723	25.1531	24.0497	25.3301	25.2328	25.7937	25.2798	26.0707	24.8967	26.7274	21.9083	21.4794	22.801
MA-00334-414	213.938	26.8803	26.7732	26.8478	26.9102	26.3099	27.2056	24.8277	25.7199	24.5695	23.262	24.9127	24.8104	24.7469	24.9284	24.6753	24.607	22.4338	23.9217
MA-00072-125	211.149	26.2748	26.8755	26.4788	26.2971	26.4419	27.0272	24.6121	23.1353	24.1407	23.6974	23.8692	22.948	23.1459	24.2418	23.3325	24.2725	23.5277	24.5065
MA-00162-387	208.179	22.6455	24.4802	24.101	24.8709	22.3105	22.9016	25.8281	26.6703	26.3112	26.8494	25.3222	26.7243	26.1656	25.9796	27.0609	26.718	26.0353	26.6041
MA-00334-120	207.717	27.4469	27.7213	26.811	27.8822	27.547	28.4261	24.1115	23.9137	25.0391	25.3095	25.2878	25.2157	27.7132	27.6679	24.0732	26.1145	25.2712	26.7182
MA-00297-69	206.067	33.8883	33.9063	33.6735	34.0512	33.4581	33.8515	31.8616	32.3104	32.1723	31.3072	31.3093	31.3772	31.1052	31.0462	31.1492	30.6998	30.6837	31.1287
MA-00173-168	204.885	30.4421	30.1442	29.9222	30.7419	30.3957	30.8462	28.8239	28.7321	28.7314	27.3041	27.5833	28.0063	26.751	27.6186	27.1994	28.1039	27.4992	28.0164
MA-00210-46	204.513	23.2063	22.7902	27.0904	28.0309	27.2649	25.6597	22.1454	20.9737	28.978	22.6438	23.1893	24.7322	23.2392	22.616	22.7569	21.0665	24.3406	25.3625
MA-00162-73	203.94	29.6756	29.1972	29.8628	29.2633	28.877	29.5939	28.2296	27.8631	28.5002	26.6155	27.6649	26.7062	27.3042	28.5462	26.9167	25.3206	25.3539	25.053
MA-00334-421	202.697	27.8605	27.9623	27.9985	29.2673	29.1978	29.2923	30.1989	30.4044	30.5581	30.0989	30.242	30.0928	30.4684	30.5777	30.0864	31.7129	31.8255	32.1619
MA-00009-2	202.11	25.163	25.3675	23.6361	28.7198	27.5603	27.1652	27.8946	29.8752	28.2801	28.5036	25.1585	24.2874	24.519	30.1588	25.6024	24.5677	28.7204	29.8974
MA-00139-94	200.389	27.0928	27.7161	27.5758	26.9364	26.5136	27.0182	25.1985	26.1295	25.1304	24.8872	23.2459	24.3326	24.8101	24.0504	25.2227	23.0287	25.0649	25.2667
MA-00303-50	199.712	27.9333	27.5763	27.3057	29.0847	28.8018	29.149	29.8646	29.8527	30.2675	31.0084	30.6546	30.6751	31.2769	32.2283	30.8568	30.7431	31.1967	31.325
MA-00184-58	199.333	28.919	28.3301	28.5696	29.4304	28.5691	29.4678	26.0224	29.2146	29.1177	25.8132	25.0222	28.983	29.1983	28.9697	24.9148	25.8747	25.7469	25.4397
MA-00297-424	198.67	26.4521	26.9643	26.4056	25.121	25.5408	26.6959	22.922	22.4286	23.6187	23.6153	22.9363	24.7307	23.3851	24.1734	25.3832	23.5324	24.487	23.5043
MA-00320-72	198.519	30.0456	30.0757	30.3622	30.8861	30.7373	31.0697	31.5279	32.2217	32.1552	33.005	32.9641	33.0205	33.3303	33.3033	33.1937	32.7033	32.7962	33.1349
MA-00090-305	196.349	27.8597	27.8379	26.5958	25.2266	25.3142	26.0609	23.9055	22.6252	22.9716	21.1871	24.2886	24.5631	24.7579	24.6331	24.7632	23.9181	24.0298	24.8462
MA-00090-157	193.921	27.9424	27.2771	26.2575	28.1295	27.7392	28.1576	30.3938	30.8961	30.2586	30.3948	31.2982	30.1904	30.9637	30.6065	29.8712	28.8905	28.4633	29.2673
MA-00334-30	192.52	29.6456	28.7687	29.3382	29.2082	28.641	29.2722	27.757	28.0665	27.4777	27.8094	25.6816	26.0594	25.7779	26.1413	27.537	27.4507	27.1959	27.1586
MA-00073-551	192.077	26.761	26.3751	26.64	24.6592	25.7053	27.186	23.5298	25.4678	25.1651	22.9993	22.3302	23.4241	24.7727	23.8172	24.5735	25.0794	24.8671	24.0293
MA-00153-219	191.882	24.5551	26.6798	25.7685	23.8045	24.9908	25.0673	24.9499	25.2689	23.6759	23.2858	24.2968	23.4824	22.7265	22.7122	22.3344	21.5405	23.5025	21.8715
MA-00297-140	191.819	26.0906	26.7019	26.4677	26.7515	25.2178	25.9565	23.6362	24.103	23.5536	23.3821	23.2554	23.8035	23.4502	23.7558	23.8559	23.4695	24.0274	24.1189
MA-00072-243	191.473	25.7803	25.0899	25.3019	24.2878	24.1645	26.2505	27.7142	28.0394	27.4475	28.4785	28.5263	28.7721	28.1358	28.4443	28.198	28.7414	28.5454	28.2113
MA-00334-21	190.999	29.7818	29.6673	29.3214	29.3906	28.478	29.4675	27.6225	27.8236	27.6744	27.1901	26.0019	25.4354	26.9214	26.8386	27.6534	28.0659	27.3649	28.3148
MA-00153-47	190.222	28.9397	28.5835	28.6574	29.1356	28.6955	29.0744	26.5638	26.5942	25.8813	23.7329	25.1488	25.3689	26.2028	27.5746	25.8445	26.4768	26.3202	25.5912
MA-00323-110	190.065	27.6434	28.3614	27.7149	27.309	27.5225	27.9535	25.4607	25.5009	25.9353	25.3403	24.1851	25.5116	25.3801	24.9731	25.1995	24.4668	25.3716	25.1808
MA-00323-41	189.805	24.9193	25.7608	23.0675	25.5937	25.2682	26.1075	24.8544	24.4202	24.4499	26.6544	26.0502	26.4406	27.7263	27.5836	27.3951	27.4393	27.6902	27.9839
MA-00073-579	189.509	23.3431	26.7558	21.7043	25.2407	25.1804	26.0514	26.6776	27.5767	27.4551	27.7959	28.0573	28.102	28.2441	28.4629	28.3816	27.6826	27.4999	27.9304
MA-00055-196	188.747	26.3912	27.0475	26.8439	27.9112	27.3618	27.8014	28.7536	29.2943	29.2459	29.6121	29.2947	29.389	29.953	29.7122	29.589	29.7912	29.6661	30.1179
MA-00189-401	188.428	27.9118	27.9769	27.3734	27.9512	27.446	27.1153	23.5388	25.9741	23.4958	25.2762	22.8524	25.7034	24.8916	24.7175	25.1765	24.3009	23.0665	24.8025
MA-00101-668	187.027	34.043	34.1529	33.933	34.3033	33.7946	34.2479	32.5452	33.0828	32.552	31.9476	31.8682	32.0832	31.7947	31.5215	31.5757	30.9086	31.284	31.4871
MA-00073-62	185.983	30.2755	30.3171	29.8237	30.1853	29.7968	30.1848	29.3253	29.3578	29.0005	28.2973	28.7689	27.9777	27.7949	27.8391	26.8591	26.5721	27.1379	27.2421
MA-00090-43	185.783	26.4033	27.0746	26.2699	25.7763	26.6261	26.7356	27.6656	26.9365	24.6341	27.9322	29.0553	28.6235	28.6845	28.6721	28.3831	29.1101	29.4906	29.704
MA-00090-258	185.735	24.3327	24.8566	24.7188	24.4325	23.406	24.5629	26.6359	27.0169	25.9996	26.5133	26.158	26.2267	27.8785	27.9268	27.6047	25.7272	26.8145	27.0681
MA-00101-502	185.207	26.9007	21.5237	26.3593	25.3785	23.9869	23.3286	28.3303	27.405	27.7407	29.7043	28.9696	30.493	29.0832	29.1741	29.5814	29.5399	28.6404	28.8347
MA-00210-275	184	30.2497	30.1403	29.6801	29.4102	29.4242	29.5599	27.9683	27.9254	27.816	27.2629	27.5593	27.5722	27.6036	27.7696	27.1782	26.5368	26.8045	26.9326
MA-00139-294	183.72	28.1609	28.8274	27.9245	28.5613	27.6366	28.2569	26.3804	26.8909	27.0696	26.1234	26.5246	25.9954	26.5177	26.2293	25.8409	25.2477	24.8769	23.9911
MA-00101-628	182.381	26.3609	26.9224	26.1196	26.0154	25.754	26.3819	26.1478	25.3148	26.4319	25.5696	26.2805	25.802	24.8161	25.7534	25.8275	22.8775	22.3917	21.6566
MA-00120-559	181.445	30.031	30.171	29.844	30.4287	30.4433	30.4901	28.3958	29.0148	29.0528	26.6725	26.7694	27.4365	27.9798	25.8701	26.8477	25.9268	25.2421	27.0817
MA-00067-129	181.217	25.3271	25.9107	25.9656	26.943	26.547	26.6732	26.8371	25.9525	26.6147	26.9751	27.1577	27.0734	27.2512	27.3112	26.9148	29.3725	29.3493	29.8466
MA-00090-256	181.115	28.9027	28.9653	28.5128	29.88	29.8063	30.2743	30.652	30.8361	31.0919	31.2884	31.7261	31.3624	31.6486	31.5011	31.7178	32.019	32.1463	32.2421
MA-00334-567	180.611	31.499	31.8284	31.1806	31.2379	30.9851	31.1739	29.6096	30.0274	29.6721	28.9036	28.5226	29.3061	29.0621	29.0576	28.7104	28.1464	27.8257	28.59
MA-00334-211	178.124	24.4481	24.5848	25.0513	22.8461	26.062	25.9773	21.9823	22.7559	23.0099	21.3228	23.1654	21.1436	21.4248	21.7283	23.0757	22.3232	20.6241	20.8902
MA-00184-85	177.256	22.8426	22.8229	22.5512	22.3385	24.6307	21.6416	21.1008	20.6191	25.2625	26.0302	25.8647	25.741	25.4007	22.5274	24.7137	24.3585	20.4178	24.8296
MA-00326-56	176.578	28.2081	28.3693	27.0265	29.9756	29.6048	30.0624	30.9096	31.175	31.0663	31.5461	31.3453	31.5246	32.0691	31.6597	31.6992	31.8117	30.9577	31.8042
MA-00297-520	175.967	27.6014	28.2688	27.8185	28.4901	27.9709	27.141	25.9297	26.7556	25.5778	24.3167	24.3334	24.596	24.8317	23.4583	25.2727	23.8311	23.6176	25.4259
MA-00189-445	175.787	26.4972	25.9681	26.2575	27.2974	26.1206	28.3109	28.5667	29.1088	29.0366	29.442	29.0126	29.4139	29.7947	29.3631	29.2127	28.1339	28.9381	28.4449
MA-00334-355	175.736	27.9626	27.2098	27.6125	28.8107	27.9292	28.8843	29.6693	30.0688	30.0733	30.4051	30.6285	30.6515	31.1832	31.0158	31.0627	30.698	30.7509	30.9604
MA-00153-189	175.288	24.3772	25.801	25.5587	25.2538	26.0479	23.7217	23.8683	24.9474	24.5917	24.5272	24.777	23.5207	27.9687	28.3071	25.3542	26.6753	26.968	27.1297
MA-00268-8	174.429	28.2157	28.5254	28.3307	28.1334	26.9451	27.3545	24.6827	26.5378	25.4105	24.5171	25.6634	25.035	24.6916	25.9349	25.2597	25.5582	24.072	26.0995
MA-00213-534	174.107	23.3629	24.4156	23.1063	25.47	25.4502	24.1882	25.3646	26.2824	25.8401	26.8181	27.4575	26.8017	27.3835	27.447	27.1856	26.445	26.0988	26.366
MA-00055-99	174.014	30.1304	30.3761	29.837	30.1518	29.8199	29.9745	27.7337	28.4982	28.2677	27.826	26.7094	27.9846	27.7662	27.5713	27.4481	26.6619	25.3188	27.0133
MA-00139-368	172.985	30.1615	30.4506	30.2438	30.5972	29.6911	30.3065	28.0858	28.6181	28.8579	27.6586	28.7978	28.1017	27.946	28.1445	27.9468	27.4859	26.661	27.7769
MA-00334-294	172.822	30.0899	30.4058	29.9053	31.2459	31.13	31.3545	32.0004	32.4615	31.9735	32.7552	32.8226	32.7931	33.0658	33.0727	32.8214	32.8381	33.2336	33.2619
MA-00111-10	172.788	30.1724	30.2469	29.7649	29.7792	29.7105	29.8884	29.253	29.5204	29.6041	29.2954	29.3422	29.1888	28.6674	28.8458	28.5114	25.6135	24.5006	25.9794
MA-00073-127	172.627	35.2897	35.4853	35.4913	36.7677	36.4898	36.8281	37.3812	37.6522	37.5267	38.0369	38.3025	38.2724	38.417	38.3067	38.3278	38.1874	38.1262	38.471
MA-00067-135	172.207	25.2064	25.1428	24.538	25.3953	25.4612	26.7428	24.0887	24.7297	24.5975	21.689	23.7774	24.0757	25.3204	20.6265	25.0449	22.8303	22.7253	22.736
MA-00323-139	170.748	26.3889	25.6782	25.529	24.9875	23.3975	24.9457	23.6307	23.5213	23.7149	22.9607	24.487	21.9124	23.3592	22.4277	23.1204	22.6953	21.0804	23.1219
MA-00210-93	170.598	30.9448	31.3841	31.0691	31.6738	31.5864	31.536	29.512	30.2368	29.8497	29.2411	29.3581	29.1528	28.3791	29.1134	28.9193	28.1988	28.6163	28.9294
MA-00067-219	170.442	26.4105	26.9029	26.2696	26.772	26.1062	27.1762	24.3342	24.4025	24.0164	26.396	22.6234	25.7865	24.095	22.9911	25.4068	23.4383	25.15	24.0304
MA-00139-159	170.44	28.2847	28.5409	28.2908	28.2268	28.3021	28.745	27.7485	28.3767	28.4805	26.2871	28.1907	26.6606	26.5233	27.261	26.9994	25.5399	23.3661	25.5938
MA-00270-201	170.334	29.5363	29.6898	28.9895	29.8927	29.6056	30.25	28.2528	28.6992	28.9628	28.6404	26.9157	28.8921	28.2042	28.2071	27.7549	25.2768	26.4574	26.6167
MA-00334-75	170.298	25.7403	25.3077	24.5388	26.2986	26.8341	27.17	28.0336	28.4389	27.8338	28.0609	28.1871	27.5489	28.4041	28.2244	28.3885	28.2181	27.5996	27.9151
MA-00120-112	168.728	29.7722	29.7188	29.5375	29.4334	29.6036	29.778	28.2434	27.9947	28.1254	27.5206	27.185	26.983	27.5387	26.8928	27.1811	26.9961	27.3067	27.5608
MA-00184-35	167.976	30.0145	30.3313	29.8423	29.9018	29.2867	29.2048	27.4854	27.8224	27.7004	27.4579	28.1809	26.7811	28.3009	26.8837	28.0093	28.0896	26.3137	27.0405
MA-00173-30	166.21	26.7223	26.8096	26.6267	27.7289	26.6357	27.1978	25.1525	24.904	24.693	23.8493	25.41	23.6416	23.6996	22.3708	25.096	24.4383	24.8889	24.6986
MA-00090-259	165.938	22.0102	21.9933	20.023	24.0288	23.9661	24.486	24.9246	24.9161	25.2664	25.9924	25.764	25.5931	25.2245	25.7992	26.106	25.6702	25.1206	25.1812
MA-00072-330	165.661	26.0483	26.6827	26.9315	25.837	25.2803	25.5013	26.217	23.7665	23.8797	23.7769	23.7908	23.8843	24.7625	23.877	24.3493	23.1267	23.3765	23.3774
MA-00189-62	164.226	25.6779	23.6678	24.5051	26.894	26.6174	27.0461	28.821	28.3646	27.6589	28.3509	27.9679	28.5302	27.5331	27.3814	26.0341	26.1678	26.5122	26.7301
MA-00106-1	162.01	26.0454	27.6892	25.3735	29.1755	26.8503	27.2034	28.6544	30.2223	29.4682	30.7283	30.7048	30.7228	30.9871	30.8796	31.0776	29.8286	29.8362	30.3328
MA-00320-171	161.643	29.7976	29.9408	29.3564	29.7147	29.2754	29.6807	28.4619	28.4964	28.616	26.4527	27.7556	27.7811	27.711	27.0172	26.5808	28.4855	27.4658	28.0825
MA-00162-92	161.52	25.8918	26.5632	25.6927	26.3575	27.2367	26.753	26.6776	21.3443	21.549	27.0876	26.6057	27.0629	27.2005	27.1006	22.1272	22.1862	25.8229	27.1085
MA-00101-283	161.145	22.2101	27.1313	25.8235	27.1032	26.3693	23.1932	25.3869	24.4005	24.7067	23.0041	27.1225	27.6929	27.4799	28.1266	28.6625	25.1514	24.9262	24.8825
MA-00072-183	161.084	23.4243	22.7387	23.8659	24.0207	22.4011	23.7585	24.2379	23.3461	22.1859	24.259	24.3041	23.645	23.864	24.579	22.5565	26.8591	26.2481	27.4409
MA-00073-134	160.381	27.3842	27.3734	26.1678	28.0231	26.8938	27.978	22.2848	25.808	24.6843	24.4641	26.0217	25.0242	22.8657	23.5608	24.2227	23.7832	24.1975	24.6986
MA-00101-420	159.626	24.3296	25.7746	23.9426	26.4502	25.5781	26.884	26.2467	26.3519	26.5651	27.6905	27.5921	27.4663	27.7627	27.8142	27.456	27.8175	27.9576	28.275
MA-00334-341	158.715	27.5877	27.9306	27.2002	27.6485	26.1752	27.7748	24.5287	26.4214	26.5912	25.5133	26.8564	25.5497	22.7782	25.3896	23.4406	23.8079	24.1997	25.0337
MA-00120-471	158.443	26.0745	27.3205	26.3967	27.3483	25.9657	27.0056	24.3738	25.065	25.3557	23.3888	23.6958	24.6126	24.8644	25.0882	24.0448	24.1955	24.2908	25.0228
MA-00268-22	158.242	32.4445	32.4439	32.1062	32.3171	32.0961	32.2335	30.6568	31.1472	31.0799	30.4725	30.2735	30.5296	30.3828	30.7927	30.0445	29.1047	28.9657	29.6091
MA-00067-368	157.997	24.9971	24.6154	25.7965	26.0685	26.0607	26.5189	26.7695	27.5906	27.5278	28.0714	27.7021	28.3087	28.6391	28.1972	28.2933	28.2652	28.3614	28.5931
MA-00303-16	157.868	26.8185	26.5046	26.5473	26.1915	27.0358	26.8791	24.4615	24.9725	24.0914	24.7373	25.0376	23.2641	23.7344	24.4723	24.6049	24.7409	24.5599	25.1958
MA-00323-210	157.839	29.4967	29.5672	29.0175	29.7847	29.7805	30.2442	28.6054	28.4599	28.5164	27.7288	27.2828	27.8777	27.936	27.8055	28.4246	26.3733	27.0827	26.85
MA-00213-12	157.386	26.5364	25.8649	25.5857	27.5941	27.0072	26.5787	28.7047	28.956	28.8447	29.5804	29.206	29.258	29.2301	29.4448	29.1802	29.1908	29.1117	29.2604
MA-00320-17	157.013	24.6406	24.0846	24.8977	24.483	21.2579	24.5527	22.9007	22.4614	22.4074	19.1213	20.595	20.9047	21.2426	23.314	20.4321	22.2681	23.2937	22.7096
MA-00268-126	156.644	23.3786	24.53	24.7345	26.1734	27.0378	26.7363	27.6308	27.4321	26.9738	26.4231	23.46	25.8077	26.8119	27.3582	25.7156	23.9706	24.4983	24.1482
MA-00132-1	155.878	24.1499	26.1703	24.7343	25.8567	25.9701	26.3125	26.3556	27.913	27.7961	27.9018	28.0936	27.7821	28.0264	27.9617	27.6788	27.4185	28.457	28.2229
MA-00055-264	155.84	29.9883	30.456	29.3447	30.4727	30.1629	30.5173	28.1728	28.3206	28.6789	27.9666	28.8391	27.9232	28.13	28.3883	28.3695	27.0986	26.3702	27.5627
MA-00184-78	155.788	26.9499	27.0005	26.8352	27.2091	27.6386	27.8844	29.3319	29.23	29.2799	29.994	29.328	29.8336	29.8819	29.8117	29.6134	28.6957	28.2616	28.7568
MA-00270-202	155.597	31.4582	31.8004	31.2265	31.8057	31.5573	31.7298	30.2601	30.5693	30.513	30.0794	30.1515	29.9574	29.8128	29.9109	29.7521	28.2365	28.8349	28.3816
MA-00120-22	155.511	31.9855	31.8902	31.6151	32.3198	31.512	32.1656	30.7603	31.1746	30.8534	29.6406	29.9304	29.5829	29.5767	29.6646	29.8231	27.6659	28.6435	28.328
MA-00073-513	154.356	26.5586	26.2687	25.524	26.9785	27.3231	27.2962	24.1588	25.6139	22.8263	24.8275	25.1274	23.5106	24.498	23.3985	22.1305	23.8217	25.3577	24.7577
MA-00112-36	153.796	27.3037	27.4077	27.5895	26.6207	28.0598	27.0884	25.9331	26.8896	25.4342	22.437	25.3563	25.2689	24.7089	25.0345	25.2227	24.9745	25.4105	25.2136
MA-00101-120	153.71	29.5929	29.7637	29.5135	30.9256	30.3707	30.8926	31.5087	31.7146	31.6461	32.2355	32.1177	32.2032	32.4464	32.4658	32.2569	32.0265	32.2976	32.6167
MA-00101-267	153.346	26.2112	27.0251	25.7565	27.9456	26.2482	27.6692	27.9979	28.6427	28.3201	28.7569	28.6421	29.1859	29.2779	29.0014	29.1119	29.3026	29.2592	29.1627
MA-00139-157	152.982	31.5435	31.2237	30.6372	31.2347	30.8163	31.0768	29.042	29.9727	29.8869	29.8142	29.4181	29.2535	29.4111	29.0624	28.986	28.1746	27.7756	28.2594
MA-00067-295	152.724	30.5779	30.6235	30.5481	30.5667	29.8693	30.4489	28.7689	29.2573	29.2289	28.4395	28.2079	28.9222	28.5967	28.0817	27.6649	27.8929	28.052	28.4514
MA-00055-265	152.631	29.1753	29.1133	28.9357	29.6031	29.4042	29.7836	30.5796	30.5541	31.07	31.6847	31.6348	31.406	31.705	31.8596	31.3773	31.3384	30.7607	31.6756
MA-00323-135	151.697	26.7478	27.0858	26.8903	27.3229	26.5982	26.9993	25.95	26.3231	25.9256	25.3197	24.1349	24.1696	24.5705	24.527	24.2728	25.0563	24.5666	24.5645
MA-00073-58	150.393	22.4979	23.6582	23.2849	24.027	23.3397	26.3753	21.7388	22.5234	22.002	21.8912	22.7577	22.0486	23.3192	23.6444	21.4032	20.7278	20.0081	20.3394
MA-00073-648	150.369	25.8549	25.4238	24.798	25.8936	22.7209	25.3001	23.1392	23.7907	24.0021	24.3035	23.2343	23.842	23.9174	23.7855	23.9593	23.2485	20.907	20.8724
MA-00189-406	149.856	26.5324	26.9739	25.278	26.408	25.5482	27.3165	23.6564	23.7568	25.5151	26.3234	27.6679	26.487	26.6246	26.846	25.9663	22.1615	23.9781	23.3062
MA-00013-4	149.716	27.1769	27.4679	27.3135	27.3114	26.9466	27.2388	24.8482	25.543	25.9927	25.5983	25.5024	22.9826	25.1255	24.0684	23.6476	25.2345	25.439	23.6831
MA-00213-277	148.995	29.4399	29.8127	29.142	28.8816	28.7777	29.226	27.3554	27.599	27.7018	27.3642	28.4377	27.4075	27.1603	26.3224	26.9742	26.2705	25.8633	26.8156
MA-00067-367	146.628	26.6883	28.8365	27.2031	29.4662	27.5239	29.2713	29.458	29.6125	29.6956	30.2697	30.4427	30.5919	30.2561	30.2016	30.463	30.0069	30.3936	30.7769
MA-00073-281	146.317	30.151	30.2976	29.8106	30.1928	29.5303	29.9205	28.2593	28.3279	28.2781	28.4101	27.7005	28.2417	28.0454	27.6765	27.5425	27.7605	27.7918	27.6512
MA-00297-38	145.94	29.7966	29.6931	29.6585	29.5833	28.9089	29.2613	27.8821	28.4513	28.2752	27.8604	27.7212	27.5701	26.7546	26.3522	27.4209	26.4887	26.8258	27.0247
MA-00189-201	145.812	27.911	27.6838	25.5988	27.5475	27.4668	27.4255	25.9208	26.1833	26.1844	24.8851	23.0662	22.8191	25.0055	24.8695	25.2086	25.2653	24.4769	25.8096
MA-00072-249	145.754	30.6251	30.9192	30.2563	31.2047	30.8129	31.2038	29.3203	29.5762	29.5101	28.5131	28.599	29.0434	28.844	28.5328	28.3293	28.2305	28.352	29.2028
MA-00297-221	145.49	24.9324	25.6275	24.5786	26.06	25.5575	25.4636	27.4559	27.6589	27.344	27.6024	27.759	28.1095	27.4973	27.1046	27.7681	27.7505	28.1652	27.1095
MA-00206-42	144.043	24.886	25.8218	26.0771	26.5951	26.8249	25.6413	27.4904	27.2316	27.7279	27.711	27.764	28.7043	28.1603	28.4508	28.0235	29.1914	28.7218	29.3682
MA-00072-9	143.217	29.4081	28.9666	29.1696	29.1142	28.0655	29.279	27.392	27.2843	26.6281	26.5668	26.4553	26.2589	27.261	26.3995	26.7171	27.983	26.3747	27.864
MA-00055-335	142.668	28.943	28.8892	28.8908	29.826	29.2234	30.0958	30.2563	30.8625	30.7617	31.31	31.4718	31.2989	31.6907	31.2658	31.3705	31.2329	31.2347	31.7954
MA-00090-8	142.532	28.1042	27.8751	27.8096	27.926	27.1897	28.3447	25.6407	26.3535	26.5965	26.2071	25.5104	25.35	26.0744	24.6736	25.764	26.3887	25.6738	25.9732
MA-00334-559	142.236	25.3954	23.3215	24.194	24.9707	25.8708	25.2951	26.5761	27.1631	27.1951	24.4446	24.6702	22.4814	24.7155	23.6735	26.1759	22.53	25.9729	24.1968
MA-00153-462	142.113	30.4548	29.5644	30.2502	30.0646	30.0798	30.4962	29.2415	29.5392	28.9033	28.4016	28.3013	28.8213	29.1381	28.5136	27.8655	27.2654	27.1334	27.7937
MA-00120-304	142.056	26.6132	25.7664	24.8653	28.1177	27.2422	27.8	28.253	28.4435	28.7997	28.1729	27.9138	27.828	28.7334	28.8502	28.3468	26.0806	25.8909	27.1433
MA-00323-91	141.369	22.6536	22.4047	19.6141	22.025	22.6573	25.7795	24.7398	24.9518	23.0121	25.1733	21.9285	24.6859	24.6101	24.6877	25.8683	24.3653	24.1742	20.9096
MA-00189-474	141.274	25.7729	27.1724	24.2426	27.0052	25.0685	27.1319	26.1766	25.7226	27.6587	28.1785	28.5471	27.8929	28.7588	28.7525	26.6509	27.7545	28.0683	28.0465
MA-00111-12	141.218	27.628	27.9211	27.2964	27.7858	26.3998	27.5569	26.262	25.0559	26.159	25.7096	25.9817	26.0551	26.1281	25.846	25.5781	22.774	25.1823	22.1736
MA-00270-197	141.095	27.7062	28.2111	28.0341	28.6589	27.7889	28.3814	29.9489	30.1751	29.9107	30.0818	30.3874	30.4279	30.5544	30.1455	30.0744	29.8416	30.0609	30.2325
MA-00055-190	140.859	24.8776	23.8305	26.5849	22.767	21.7997	21.9821	27.3254	24.4799	26.5361	24.5617	24.4767	26.1538	26.2286	22.662	27.5124	18.1991	23.5361	23.2283
MA-00153-241	140.766	27.6606	28.2841	27.4792	28.2111	28.3281	27.7811	25.566	25.6163	25.1212	25.5029	24.1128	24.7394	25.0398	23.9316	25.1765	21.8417	23.2784	26.194
MA-00297-22	140.494	27.6445	26.0399	28.0345	27.423	26.9606	28.8197	29.5657	29.9829	29.7054	30.4155	30.5927	30.5933	31.0016	30.8605	30.8877	31.1926	31.08	31.468
MA-00320-201	139.444	29.8807	30.048	29.8395	29.3168	28.969	29.9024	27.7562	28.0284	27.9197	27.4306	28.0763	27.1578	28.0978	26.1726	26.8856	27.4778	25.9196	27.5208
MA-00120-346	138.731	28.3145	28.0008	27.9334	27.5958	28.6823	28.4878	28.1343	27.6833	28.2053	29.4687	29.4915	29.2962	29.4273	29.551	29.5145	30.5934	30.5795	30.9063
MA-00055-325	138.727	27.7516	26.8102	26.3032	23.4928	21.6457	25.635	27.8207	27.541	27.2126	28.4191	27.2274	28.537	28.4905	29.1319	28.4212	29.1697	30.5011	28.0886
MA-00268-173	138.699	28.2837	28.3366	27.7623	28.2842	28.453	28.2605	27.1807	26.5571	26.0641	26.2823	24.276	25.4144	25.5473	25.5287	26.0422	24.9999	24.6795	25.4319
MA-00073-463	138.529	27.0751	26.6087	25.6353	27.2528	26.4731	26.9738	24.2422	26.2329	25.2934	25.2215	25.748	24.4452	25.3803	23.4008	24.6697	25.2118	23.3815	23.8968
MA-00101-551	138.142	26.6446	26.4014	25.8577	28.582	27.6473	28.0386	26.2497	26.1806	26.5221	25.3377	25.6215	24.5937	25.1375	24.7393	24.9593	26.1799	25.1646	26.925
MA-00270-223	137.427	28.4242	28.905	28.2874	28.3554	28.4217	28.1231	26.1898	26.8282	27.8065	25.598	25.2856	27.0082	26.8989	26.9218	25.2249	25.6813	25.858	26.8646
MA-00270-217	137.423	24.6256	25.1509	24.5623	25.5927	24.6812	23.8517	24.2064	22.8881	22.6115	21.8554	23.9038	23.9135	20.423	23.6344	21.3569	22.7148	21.0115	23.7211
MA-00326-159	137.322	27.1493	27.0666	26.3077	27.512	27.4465	27.7419	27.91	28.5046	28.0294	28.3672	28.5802	28.9347	29.4451	29.5468	29.3414	29.5409	29.8355	29.6051
MA-00184-569	137.265	25.5732	26.4473	25.9889	26.6903	25.8986	26.6295	27.0809	27.8368	27.7242	28.5108	27.8348	28.2135	28.5475	28.5089	27.9053	28.5029	28.6718	28.7517
MA-00323-26	137.05	28.3948	28.813	28.4698	29.7275	28.3292	29.5288	26.3054	26.9754	26.7985	26.4465	26.5486	26.6225	27.6824	26.6024	27.2126	24.2405	25.7379	26.7688
MA-00153-662	134.953	30.4696	30.3723	30.3474	30.9898	31.0328	31.0717	31.5956	31.9682	31.9122	32.5425	32.5824	32.5707	32.7766	32.8627	32.5585	32.7408	32.9974	33.3303
MA-00320-29	134.861	25.8601	26.3611	24.2062	24.5171	26.3494	27.0342	24.2791	24.5805	25.7858	27.2537	25.834	26.351	29.1604	29.581	26.4436	28.3985	27.0844	27.5295
MA-00090-170	134.791	26.7253	26.7477	26.7174	26.8066	26.7958	26.2363	22.3923	26.5611	25.6238	25.8385	25.5863	26.3608	26.4448	25.5508	23.6875	24.8347	23.3472	22.3236
MA-00184-571	134.64	30.7897	30.9595	30.5819	30.8003	30.2409	31.1123	28.855	29.0801	29.3939	28.8505	28.6563	28.5518	28.5544	28.9474	28.3554	28.2966	28.3627	28.001
MA-00055-167	134.018	27.4098	25.3546	26.9542	24.6867	26.5856	26.8224	27.8522	27.7608	27.1259	28.324	28.6916	28.4992	29.2839	29.9781	28.7494	29.1726	28.9073	29.1417
MA-00118-1	133.967	32.4083	32.3238	32.0927	33.7047	33.1433	33.5062	34.0832	34.2828	33.9677	34.7403	34.6033	34.6944	35.0266	35.0225	34.9848	34.8562	34.9505	35.1146
MA-00297-377	133.138	28.2639	28.899	28.2693	29.904	28.8562	29.7062	30.1096	30.6911	30.4323	30.4604	30.7881	30.8262	31.3642	31.0673	30.9376	30.9057	30.816	31.3442
MA-00173-161	132.711	25.9584	26.9343	26.8327	26.8339	26.4343	27.052	24.338	25.6447	23.9683	23.679	24.0044	25.2747	25.45	25.6815	24.1413	25.1238	24.0656	25.8934
MA-00189-53	132.22	25.7282	25.6505	25.1977	26.7839	25.2296	25.8365	25.2562	25.1102	24.8339	24.3795	21.2878	20.3956	24.7383	22.8273	21.4698	23.8722	22.3231	25.724
MA-00154-1	131.926	25.948	25.4111	25.4006	24.7061	25.0183	25.924	26.1178	20.9965	25.9594	23.7054	25.4173	26.0845	27.0595	25.216	25.5695	24.4923	20.6132	20.8056
MA-00210-23	131.775	28.6438	28.0675	26.0272	28.0569	28.0008	28.4815	27.0071	26.2444	26.8957	26.1193	26.4175	26.477	27.5546	25.3407	26.0687	25.7066	24.8117	24.5249
MA-00073-692	131.398	29.722	29.5542	29.5759	29.5147	29.5575	29.9127	27.09	26.9604	27.4522	26.9798	27.1266	27.7238	28.4613	28.0683	28.5202	28.3666	28.7502	28.3648
MA-00323-39	131.272	31.1108	31.1533	30.8984	32.1137	31.3828	31.5882	29.7526	29.6922	29.8062	28.1011	28.5964	28.8139	28.6829	28.5436	28.9866	28.9699	29.3799	29.3025
MA-00073-388	131.209	28.0162	27.9846	27.6422	28.6417	27.4436	28.982	29.0841	29.0226	28.2886	28.7676	29.3104	29.2374	29.9825	29.6395	29.87	30.849	30.5852	30.8885
MA-00101-306	131.201	22.8027	22.2307	23.8998	23.6404	23.8913	24.6589	25.2083	26.1078	25.0176	26.1256	24.9162	25.7154	26.5925	25.7266	26.2203	25.346	24.3663	23.7147
MA-00334-331	130.885	27.8809	28.3326	27.3435	29.2787	28.7093	29.4348	29.9668	30.2771	30.0072	30.3345	30.2842	30.8348	30.8305	30.6594	30.6458	30.5219	30.4797	30.735
MA-00184-578	130.126	25.9785	26.1371	25.3577	25.1428	25.8844	26.3031	23.5545	26.0436	23.7456	25.5691	24.4458	23.8891	28.8628	29.9137	24.8957	26.41	25.571	26.6464
MA-00101-533	129.965	28.0761	28.0564	27.84	27.1216	26.654	27.3916	26.1431	26.3731	26.679	26.3406	26.798	26.1239	25.7026	25.9411	26.2347	25.3379	22.746	23.4738
MA-00270-16	129.909	26.4155	26.3882	26.202	26.0219	25.7296	24.4824	23.1178	24.4324	25.1672	23.6713	23.4251	24.2782	23.9739	22.973	23.3218	24.874	20.5657	26.1458
MA-00297-21	129.849	24.517	23.5695	24.4301	26.1164	24.6687	21.054	27.1137	26.4861	26.5007	26.7582	25.8041	26.369	27.1612	27.9681	26.4042	27.209	26.9354	27.0494
MA-00173-126	129.362	30.3634	30.36	30.0128	30.2443	29.6054	30.0383	28.4146	28.2244	28.9055	28.1913	27.9796	28.0858	28.2588	28.3187	27.7903	27.5782	27.9122	27.7783
MA-00189-361	129.131	30.5162	30.7033	30.1133	29.8013	29.866	30.1069	28.7969	28.8125	28.7929	27.114	27.6077	28.3805	28.2184	28.6841	27.77	27.3059	28.0029	28.1088
MA-00101-495	128.492	26.2949	26.3611	26.0665	26.7442	26.5235	27.6723	28.0089	28.2416	27.8562	29.2821	28.8187	29.2108	29.156	28.6157	28.3866	27.9158	28.1616	27.1487
MA-00090-160	128.235	31.4284	31.2346	31.5868	33.2336	32.3196	32.9667	33.3033	33.8974	33.6944	33.8883	33.9242	34.1068	34.212	34.2897	33.87	33.9848	33.7252	34.4334
MA-00101-51	128.115	27.3508	28.1607	27.2925	27.88	28.0705	28.0958	29.327	29.2216	29.3087	29.4839	29.8657	29.7693	30.0188	30.076	29.9495	29.883	30.1654	30.248
MA-00189-312	127.92	27.5422	27.8466	25.2391	25.6622	26.8701	27.1565	25.0662	23.4158	23.7846	25.0135	24.7939	25.1604	24.217	25.1147	25.4715	24.4713	25.3656	23.2799
MA-00190-34	127.556	33.2193	33.4209	33.1256	34.2549	33.8883	34.4083	32.4112	32.7553	32.6996	32.3806	32.1683	32.3088	31.8716	31.8923	32.0494	30.942	31.3905	31.0761
MA-00101-521	127.105	26.5398	29.1813	28.8042	29.9873	29.2617	28.0253	27.211	28.9756	28.6383	26.395	26.6094	26.0256	27.2578	26.0734	27.0714	27.1159	26.6827	30.0225
MA-00323-77	127.017	32.7113	32.9877	32.0925	32.644	32.4033	33.0328	31.1375	31.3807	31.2324	30.8069	30.9396	31.0152	30.7953	30.8029	30.3305	30.4098	29.9448	30.7517
MA-00270-172	125.556	28.2896	28.9093	27.7	27.5192	28.0518	28.2235	25.7928	26.5664	25.9997	25.9498	26.2812	25.7093	26.229	24.1612	26.1401	25.824	25.5615	25.9385
MA-00101-410	125.407	32.4775	32.5059	32.3499	32.2752	31.8714	32.1536	30.7159	31.088	30.9307	29.969	30.1155	30.018	30.5393	30.3249	30.4979	30.1765	30.1109	30.5126
MA-00297-556	124.037	26.5352	26.2333	26.2086	25.9837	25.2544	25.893	23.9857	24.0131	24.1834	24.1396	23.9879	23.7104	24.1175	23.9225	23.588	23.3785	25.1229	23.5836
MA-00090-63	123.999	28.8092	28.9814	28.5505	29.1986	29.1811	29.3135	27.3067	28.0332	27.4602	26.7341	26.6757	26.8006	27.1598	27.11	26.9783	27.7826	27.8523	28.0806
MA-00139-127	123.84	24.6996	25.2157	24.807	23.6658	25.0684	23.7275	24.03	25.6984	23.5598	23.2366	23.2448	23.6403	23.4047	23.5103	23.3178	25.8794	26.2075	26.5381
MA-00297-218	123.315	27.2441	27.1425	27.0428	27.1383	26.424	27.5539	25.9919	25.9767	26.4086	25.8477	25.5973	25.9109	24.9637	25.4084	24.7862	24.9189	23.9999	25.4303
MA-00184-388	122.432	24.0765	24.435	24.7433	25.9185	24.5451	24.8277	23.8856	25.6999	23.2956	23.7527	25.4412	24.6392	28.0296	28.6528	25.1243	26.1408	27.3982	26.3766
MA-00270-208	122.22	28.706	29.1946	28.4549	28.3132	28.1773	28.6901	27.0386	26.864	26.881	26.8861	26.483	26.4355	26.8098	27.0166	27.0746	25.7015	24.0262	24.8991
MA-00189-346	121.788	24.2264	24.6939	23.9538	24.6943	22.6402	24.4294	24.5495	24.7499	23.548	26.5274	26.5554	25.8882	26.1479	25.4464	26.0411	25.0858	22.1903	25.6368
MA-00182-63	121.441	31.0285	31.1011	30.8714	30.7129	30.7228	30.7211	29.4899	29.4704	29.707	28.7981	28.7673	28.6246	28.6837	28.8577	28.9623	28.7397	28.7525	29.4738
MA-00184-424	121.334	26.0464	26.3579	25.6708	25.1305	24.6476	24.4925	23.8216	23.7069	23.7269	24.1548	22.7073	24.3612	23.97	25.0763	25.0411	23.2405	22.8692	22.2644
MA-00184-175	121.161	26.4798	27.2242	27.2485	26.7664	25.0074	24.7332	24.2414	24.9256	24.3617	24.5838	23.5736	24.6677	24.2106	23.4131	24.6823	25.1658	25.3704	25.1225
MA-00189-261	120.027	25.2353	26.3788	26.069	26.4403	26.4164	26.2515	26.3227	26.4134	28.627	25.9988	26.4494	26.6132	26.796	27.6863	27.1948	28.7193	29.3583	28.3669
MA-00153-379	119.825	21.3933	27.7114	24.5662	24.6651	24.5098	24.5967	18.4842	25.3207	20.5768	25.3581	26.2476	24.2343	26.9607	25.6185	24.903	24.4947	25.1243	25.6137
MA-00184-271	119.648	27.8238	27.579	26.9371	26.7598	26.6492	26.8557	25.7997	25.9309	25.1222	25.192	25.1455	22.0097	25.5352	25.2229	25.3705	26.0815	24.127	25.6864
MA-00072-53	119.327	26.0568	26.7405	23.206	24.8405	26.7365	26.5209	25.6134	23.9921	23.2782	22.3616	24.345	23.4461	26.1438	22.9635	22.5212	22.0472	24.8912	24.7746
MA-00067-50	119.051	27.0877	27.2083	26.9012	27.5128	27.6419	28.4137	28.8202	29.1892	29.0769	29.1508	29.0947	29.2581	29.3292	29.6809	29.4818	29.2953	28.9417	29.3393
MA-00101-543	119.011	25.7877	25.286	26.3521	26.3947	25.0829	25.7883	26.7157	24.605	21.9928	27.5294	26.79	29.1795	26.359	27.4201	25.1281	28.5855	28.4876	28.1054
MA-00073-545	118.834	25.3988	25.7533	25.3968	25.8358	25.767	25.0359	24.4031	24.2894	24.4434	24.806	24.8169	25.7667	25.0174	24.8872	25.4778	23.0291	22.6963	22.1518
MA-00320-140	118.688	25.1798	25.8768	24.0434	24.4228	24.6383	24.9014	22.5788	19.5612	22.4751	22.0506	22.763	22.896	23.7514	23.9511	22.5106	23.5235	23.0187	21.8246
MA-00101-58	118.471	29.4401	29.054	28.8563	28.7362	27.9812	28.9521	26.6047	27.2638	26.7828	25.9465	27.7573	27.1972	25.8969	26.4144	26.0723	26.5749	26.5215	27.4384
MA-00090-261	118.27	25.15	25.3566	24.702	21.0326	24.5564	24.8237	24.8437	23.5805	23.6976	24.5262	24.0985	21.1373	22.1002	22.6573	23.2833	20.4461	20.4561	23.9069
MA-00270-206	117.845	25.8611	24.756	25.3891	26.6346	26.6759	26.2458	26.187	26.5418	26.4239	27.4054	27.7899	28.413	27.9153	28.1884	27.3841	28.1473	28.0658	28.3541
MA-00139-117	117.592	27.5318	26.6725	26.9604	26.818	26.8934	27.2367	28.54	29.1678	28.2977	29.1785	27.9419	28.6502	29.5431	28.469	28.8862	29.4613	29.5866	29.2225
MA-00210-304	117.436	25.032	25.4469	25.7973	24.8079	25.0813	24.6522	22.621	22.1611	22.7102	25.0893	25.6764	23.8526	24.1611	26.2056	22.6798	24.0517	28.1033	23.5459
MA-00055-247	117.073	26.0598	26.3703	26.1539	23.0779	24.3467	25.1931	22.9526	23.5261	23.9141	22.9379	23.8313	24.1391	22.6394	23.5717	24.0177	23.7149	23.8706	23.9498
MA-00270-171	116.981	28.6618	28.5582	26.8738	28.8877	28.1785	28.8758	26.9618	26.4764	26.8647	26.2808	26.7684	27.4514	26.1604	26.5424	26.7115	25.7159	25.726	25.5822
MA-00268-184	116.892	23.746	25.1377	21.3386	24.6422	24.0445	23.73	26.5526	27.2311	27.0508	26.3483	25.8829	26.0271	26.7197	25.7051	25.8274	25.1961	24.8414	26.2763
MA-00101-578	116.192	24.3264	23.7706	23.8615	25.33	25.0025	26.5776	26.6514	26.1288	26.9356	26.8623	26.85	26.496	25.7886	25.4391	26.128	26.4761	25.0491	27.0892
MA-00270-119	115.746	29.3373	29.1982	28.4863	31.5377	30.6271	31.212	31.0806	31.5927	31.2875	31.9746	31.5109	31.9984	32.1859	31.9537	31.6933	31.1606	31.4142	31.5816
MA-00184-347	113.964	25.6766	25.8328	20.7756	26.5219	26.2564	26.0313	26.1009	25.0403	26.2256	26.6242	26.288	26.2325	27.0606	27.2289	27.2593	23.1542	20.3057	23.6816
MA-00101-208	113.457	29.0462	28.8009	28.8398	29.5524	28.6483	29.513	28.463	28.8795	29.0196	26.6767	26.348	27.7323	27.9567	28.1435	27.3748	27.6129	27.6043	26.7743
MA-00162-165	113.171	25.6706	25.1491	24.1089	26.4509	24.8839	26.1644	27.0974	28.1044	27.8356	28.2827	28.1152	28.1145	27.7362	28.4955	27.9033	28.0295	28.5877	28.6599
MA-00326-181	112.881	32.1765	32.333	31.8744	31.6179	31.6198	31.8081	30.706	30.4801	30.0951	29.941	29.7908	29.7572	30.4163	29.9549	29.7804	30.0012	29.4609	29.1645
MA-00139-86	112.797	25.7955	25.1663	25.739	24.5768	25.0303	24.2361	23.6554	23.786	20.3554	24.0155	24.4548	23.4378	21.1965	25.5206	23.4103	22.5215	22.4115	24.2622
MA-00101-185	112.699	27.0091	27.6516	27.1813	27.4134	27.2445	27.2425	26.1377	27.0061	26.5733	25.0521	25.6836	25.5957	25.1641	26.2517	24.2628	26.4316	24.0166	26.3867
MA-00184-552	112.22	28.5267	28.4845	27.9592	31.1491	30.8751	31.3033	29.2069	29.7415	29.3489	30.6195	30.8533	30.8716	31.0045	30.6256	30.386	30.0864	29.8345	30.5585
MA-00184-79	111.692	29.2615	29.4848	29.0256	28.705	28.4774	29.0596	26.7811	27.2403	27.9346	27.4589	27.6984	26.0774	27.2471	27.6329	27.1088	26.113	26.849	26.9085
MA-00120-148	111.629	33.5978	33.5527	32.9665	33.4209	32.9145	33.6522	31.5827	32.1012	31.9273	31.4575	31.568	31.6366	31.7372	31.5322	31.6154	30.9209	30.7128	31.3409
MA-00072-185	111.612	32.7403	32.9518	32.4458	32.8693	32.5062	32.9406	31.1703	31.4656	31.3581	30.7183	30.8636	30.9788	30.7692	30.7061	30.9411	30.4059	30.6776	30.753
MA-00153-87	111.471	26.7498	27.79	26.4384	25.5062	27.4545	27.5725	24.977	25.8493	23.9821	24.5531	24.4658	25.5633	25.7125	26.1469	24.7942	23.6565	25.1447	24.8764
MA-00213-9	111.243	22.2604	23.8936	23.8124	24.2146	22.3696	22.3759	24.7187	25.0442	24.9828	25.179	24.6659	25.224	25.3441	25.113	25.2067	24.3187	23.8904	24.892
MA-00182-74	110.878	32.7756	33.2193	32.5908	33.1812	32.8937	33.1835	31.7494	31.9609	31.7534	31.3975	31.2318	31.1964	31.2942	31.1987	31.1836	30.7001	30.7361	30.944
MA-00213-489	110.852	25.3148	25.3548	24.2726	23.6752	25.0513	24.5659	25.1343	25.174	26.135	25.1598	25.3047	25.8273	27.2056	26.8459	26.2966	28.1003	27.5671	27.9031
MA-00139-27	110.837	33.15	33.0641	33.211	34.2193	33.1273	34.0017	32.9393	33.3436	33.3169	32.4982	32.3787	32.0508	32.4069	32.1011	32.0844	31.2646	30.7347	31.3196
MA-00213-321	110.834	27.2501	26.9494	27.115	25.3891	26.3796	27.255	24.5088	26.669	25.1413	24.4393	25.0317	25.9007	25.4262	22.8678	25.1661	25.4596	23.5003	23.9689
MA-00073-76	110.566	28.8703	29.0428	29.1321	27.7715	27.8682	27.707	29.4986	29.5952	29.3384	29.3217	29.1998	29.6643	29.8978	29.8175	29.5337	30.4226	30.6925	30.8752
MA-00210-112	110.279	23.9553	24.7676	24.0964	24.2201	24.1992	24.3985	25.2793	25.0703	24.8723	24.2224	23.9177	24.3158	25.3238	24.8854	25.1545	26.7787	26.6626	26.831
MA-00072-4	110.247	29.7476	29.9837	29.2431	29.3197	29.732	29.8015	28.511	28.656	28.8821	29.7035	28.2267	29.0213	28.7349	28.4077	28.1811	26.9271	27.0551	27.0927
MA-00090-70	110.222	28.1969	27.5127	26.9318	26.9814	27.3862	27.5783	28.2803	28.9663	28.7315	29.2024	29.2497	28.9161	29.7227	29.6506	29.396	28.8126	28.8488	29.1832
MA-00055-111	110.177	29.0187	29.7103	29.3944	29.7116	29.069	29.5348	27.9967	28.1179	27.3694	28.4867	26.4191	28.3397	26.6877	26.5691	27.6167	27.0305	27.7024	28.753
MA-00101-235	109.749	24.4236	25.2546	24.4163	24.9779	25.2469	24.631	21.7807	23.906	23.7488	23.7887	23.3124	24.0365	23.3913	24.0576	23.3661	22.9287	22.2591	21.8088
MA-00055-160	109.513	27.0344	26.7733	26.9938	28.2548	26.6345	25.8947	26.428	24.2956	26.4998	27.1602	21.0035	27.5231	25.0871	26.6211	21.9885	26.6353	25.5246	26.838
MA-00153-446	108.854	31.8031	32.1027	31.8022	32.5906	31.7785	32.6594	30.5307	31.9434	30.5132	30.4363	30.5332	30.6169	30.2963	30.3038	30.2994	29.9268	29.6267	30.3942
MA-00213-243	108.384	24.7747	24.9464	23.6825	24.6632	24.8356	25.1964	25.7954	25.6296	26.2473	26.7131	26.7818	25.5169	26.6374	27.0242	27.1695	25.7908	25.852	27.1216
MA-00190-49	108.221	24.0497	23.5579	24.5577	23.1121	24.5795	24.8218	23.892	23.7701	24.7598	25.2446	25.2101	26.0065	26.1841	25.5651	23.5883	26.3348	26.5486	26.8298
MA-00139-56	107.56	25.7045	26.909	26.2446	25.1754	26.193	26.0548	25.7317	27.3277	27.2728	28.6656	28.0814	27.3783	27.841	28.1409	27.386	29.1571	29.0119	29.6004
MA-00180-2	107.482	27.9444	28.2639	27.6205	27.3376	26.1294	27.6619	25.2416	26.1006	23.8907	26.1596	26.3457	25.7859	23.4578	25.8863	24.8849	26.1385	27.3688	24.5329
MA-00090-227	107.078	33.3956	33.3698	33.1568	33.933	33.7453	34.0911	32.622	32.9907	32.8378	32.1033	31.9486	32.2125	32.0247	31.94	31.8649	31.5028	31.2195	31.7965
MA-00101-313	106.51	30.1359	30.3225	29.5351	30.1146	29.8852	30.3744	28.9768	29.3975	29.0674	28.5639	28.4752	29.0171	28.6865	28.5901	28.2276	27.4872	27.2528	27.9688
MA-00320-46	106.157	27.5853	26.0343	27.5633	29.0061	27.8497	28.3954	29.6004	30.5332	29.8183	30.0864	30.4472	30.4081	30.5455	30.7192	30.5561	30.0609	29.642	30.6492
MA-00101-480	105.887	24.7667	23.185	23.2196	26.7503	24.9778	25.2813	24.8778	24.874	24.4357	23.2765	23.9776	24.1727	23.0441	25.0299	24.1691	26.7111	26.0679	27.5669
MA-00334-297	105.716	24.2496	24.0474	22.8618	23.8356	23.9152	24.1472	22.0304	23.3372	20.7303	22.1237	21.7123	21.0827	21.797	23.1286	23.1434	21.987	22.3143	21.6742
MA-00073-263	105.692	29.5618	29.9091	29.4681	29.9012	28.9374	29.7156	28.3336	28.2624	28.7313	28.1169	28.5624	28.0573	28.0729	27.9076	27.0817	26.5767	27.3317	27.4048
MA-00162-172	105.369	25.0348	25.556	23.5947	24.8374	25.0149	25.4211	22.9378	23.1825	22.4716	22.4416	23.0374	23.1083	23.6162	23.9609	23.3956	23.5402	24.0754	23.9225
MA-00334-269	105.262	29.8558	29.995	24.0105	29.3209	29.4475	30.5181	28.3209	28.0833	28.9113	29.2925	26.4343	30.0069	29.4779	29.6384	30.0173	27.0299	27.1966	26.0888
MA-00073-128	105.069	23.952	25.8997	20.903	22.4407	24.1695	24.4083	25.5418	23.9808	22.8375	25.1873	25.2802	25.4004	23.0081	22.9492	23.4836	22.8705	22.6066	22.3309
MA-00090-187	105.05	27.9616	27.8822	26.8069	26.9686	26.8304	27.3584	25.4953	25.0843	25.5546	25.7952	25.3358	25.4329	26.1471	25.9109	24.8219	24.5138	23.334	25.9849
MA-00067-63	104.673	27.4054	27.5084	25.6142	28.1064	26.5735	27.7545	29.3723	29.5097	29.1824	29.7294	29.4915	29.8197	29.7227	29.3998	29.3558	28.7925	28.5551	29.1154
MA-00210-189	104.585	28.7058	29.2677	28.3964	28.0694	28.3966	28.8534	26.217	26.1939	26.1039	27.8067	26.7013	27.5249	27.3946	27.5829	27.6619	28.3919	27.2482	28.5437
MA-00073-366	103.816	27.9311	28.4672	27.7902	26.8642	27.2327	27.7253	25.897	26.1393	25.6654	25.5412	26.4833	25.5439	26.3416	25.0878	25.6857	25.7889	25.1779	26.5314
MA-00297-272	103.736	25.2214	27.8519	24.4547	28.4525	26.1619	26.9157	28.4764	28.9655	28.4672	28.477	28.9823	29.4904	29.4765	29.1871	29.002	29.4323	29.5332	29.876
MA-00067-182	103.446	29.074	29.178	29.0796	29.3225	28.5961	29.3481	27.7394	27.8522	27.9774	27.3603	26.9913	27.2113	27.8195	23.8844	26.0544	26.7628	26.6193	28.2381
MA-00139-173	103.25	25.7988	25.671	25.0784	25.8604	24.3765	26.2411	27.2245	26.9493	26.3798	27.7603	27.0449	27.9618	26.8872	27.0037	26.8767	27.8356	27.2428	27.3806
MA-00139-341	103.135	24.5413	24.5408	23.5284	22.438	23.0998	24.8066	22.3259	22.312	22.1513	22.2554	22.4071	22.0435	22.4442	21.6978	22.0001	21.6621	22.3411	21.832
MA-00073-594	102.868	24.9447	25.2165	24.729	25.3149	24.5958	25.0314	21.839	23.9088	24.5453	22.9144	20.81	24.1485	22.1457	23.3602	22.5769	21.7258	24.0473	23.7386
MA-00072-278	102.467	24.7588	24.8058	24.6089	25.0136	24.8013	25.5761	26.3444	26.1666	26.2163	28.0521	25.534	27.7512	27.1256	26.7116	26.6964	26.7372	26.8357	27.0812
MA-00320-38	102.33	30.0131	29.7719	29.485	29.7968	29.1947	29.5868	28.1729	28.5356	28.2437	27.413	27.6037	27.9214	27.7082	27.6544	27.156	26.8704	27.5213	28.2849
MA-00334-475	102.228	24.966	25.8002	25.1013	25.5195	25.094	25.3176	22.8984	23.2377	23.5197	22.8986	23.6128	22.9623	24.7306	25.8565	24.065	24.3485	24.0419	24.5832
MA-00213-86	102.215	27.7453	27.279	27.0101	26.8441	27.2013	27.7277	25.7131	24.4539	24.4331	25.2917	25.9868	24.904	26.9783	27.4907	25.0489	26.3217	25.5472	27.267
MA-00101-158	102.199	28.533	28.4737	27.7216	28.6768	28.6325	28.2901	28.9741	28.8812	28.3414	27.3862	28.3938	28.2991	27.1591	26.4502	27.6296	25.8117	25.3862	25.8556
MA-00189-506	101.986	22.9719	25.605	25.2475	24.3209	23.978	25.5729	24.8348	26.4681	25.325	26.6451	26.1865	26.7712	27.367	26.6119	26.3149	26.9797	27.2886	27.8625
MA-00300-2	101.836	33.5179	33.4702	33.1039	33.5062	33.2026	33.4702	32.0712	32.477	32.2996	31.6511	31.7986	31.916	31.7452	31.7151	31.5638	31.2316	31.08	31.322
MA-00112-202	101.695	24.1681	25.0294	23.4956	20.8602	23.4543	24.2266	25.2043	25.7443	24.9022	24.5336	24.9457	22.8616	24.5104	24.1909	24.4593	21.5779	23.0823	21.338
MA-00073-156	101.475	23.7926	24.4192	24.0315	24.128	24.9327	24.0651	24.5391	25.8035	25.3967	26.7057	26.3376	25.872	26.8579	26.6094	27.3387	26.9043	26.6428	27.0668
MA-00189-281	101.215	24.5277	25.4866	24.3877	25.2425	25.4563	25.6364	26.1573	26.2598	26.7653	27.074	27.3729	27.1266	27.4379	27.2163	27.6525	26.4303	26.1894	26.7837
MA-00184-17	101.1	26.5483	27.5105	26.1219	26.487	26.2112	26.8418	24.2451	24.6341	25.3468	24.1762	25.1374	26.3631	23.6374	25.6826	23.8973	25.4314	24.2315	25.6192
MA-00120-442	100.798	29.1545	29.5986	29.0287	28.3571	28.5501	28.7995	27.3239	27.5741	26.827	26.9409	26.7192	27.4865	27.6901	27.0594	26.5248	26.6698	26.4313	26.9382
MA-00120-17	100.462	30.0077	30.4357	30.18	29.7469	29.5668	30.0213	28.4626	28.7895	28.9697	28.1896	28.7584	28.3891	28.7607	28.0328	28.0148	27.62	26.8463	28.2146
MA-00101-560	100.28	25.0434	25.0692	25.3104	27.0336	26.1011	26.2341	27.1679	27.4243	26.9107	27.3642	27.5834	26.687	26.9834	27.222	28.5119	28.1624	26.0642	27.9295
MA-00139-78	100.117	25.562	26.3162	26.3496	26.9993	26.1142	26.3828	24.5623	25.7846	24.6783	24.3647	24.5056	23.4196	24.2213	24.7225	24.724	23.0368	24.557	24.9835
MA-00067-233	99.9345	26.5127	25.7559	24.2386	25.0576	25.804	26.9665	24.71	25.3124	26.1085	26.8867	27.3662	27.6209	26.4554	27.6958	27.4524	26.7425	27.157	28.1662
MA-00210-98	99.9247	30.0153	30.3368	29.5476	29.9117	29.7468	29.8322	28.1923	28.5446	28.4557	28.2145	28.3183	28.3174	28.1538	27.8716	28.234	27.2122	28.1812	27.4866
MA-00073-670	99.6795	24.8562	24.3968	23.8481	25.0102	24.1736	22.8432	23.5326	24.9197	24.3244	24.385	24.2413	23.4233	26.1156	28.8944	25.5243	25.9365	25.4791	25.6831
MA-00210-85	99.5554	25.0536	26.2618	25.6191	25.8339	26.0696	26.4909	23.9108	23.7725	23.6538	23.3969	22.0114	22.0961	24.2618	22.4613	21.5739	26.7244	23.9834	27.4302
MA-00120-484	99.5463	32.8682	32.7714	32.941	34.4146	33.8792	34.2193	34.0673	34.4334	33.9677	34.6944	34.3892	34.8838	35.3892	35.6918	34.715	35.3633	35.78	35.5669
MA-00190-33	99.4968	28.5096	29.0936	28.5737	29.4081	28.5118	29.0511	27.2356	27.7524	27.2581	28.0299	27.2698	27.0928	26.7661	26.9071	27.1707	27.3371	27.1106	26.411
MA-00119-16	99.1862	31.8304	31.88	31.5696	32.0704	31.5433	31.957	30.736	30.9613	30.5275	29.9307	29.6587	30.0637	30.1523	30.0415	30.0282	29.9293	30.0737	30.1059
MA-00317-31	98.9932	28.8676	27.8812	28.6413	30.3167	30.1393	30.5977	30.2129	30.4231	30.2377	30.7506	30.3625	30.9508	30.7405	30.6321	30.7236	31.7001	31.3831	31.4164
MA-00184-64	98.6952	27.6736	27.6832	27.6	26.3582	27.3595	27.5227	25.6804	25.1092	25.6462	23.9816	25.6303	25.748	26.824	27.0885	26.5573	25.6491	25.6257	27.0161
MA-00067-41	98.5974	28.2479	28.4503	27.9045	28.2166	28.0314	28.3894	27.6601	27.7146	27.696	27.0165	26.9012	27.1897	27.2223	26.6396	26.8654	25.1385	26.1041	25.8158
MA-00268-119	98.1283	21.996	24.5103	27.5913	24.7706	21.2477	23.3935	22.991	23.0028	24.5988	22.6135	24.836	25.0893	27.9306	24.6292	24.1108	24.4775	24.0863	21.2073
MA-00260-2	98.0535	25.2042	26.8157	25.0322	26.1822	26.116	27.0876	25.23	25.5605	25.918	24.9536	24.8213	22.8166	25.4714	24.8652	24.9802	22.6738	24.476	24.3104
MA-00162-110	97.6372	27.1362	27.7135	26.7576	28.1857	28.5832	28.2076	29.5935	29.7847	29.9791	29.9893	29.9338	29.8659	30.0982	29.95	30.2647	29.995	29.7136	30.0521
MA-00111-33	97.4571	27.5644	27.9523	25.7892	26.459	26.9646	27.3714	27.2491	27.8129	28.1	27.906	28.6374	28.0667	28.7373	29.017	27.8241	29.1093	29.1662	29.8488
MA-00153-324	97.3884	24.4109	25.1002	23.4454	24.0972	24.7827	26.5393	27.4072	26.7705	27.5192	27.1504	27.0691	27.7007	27.2428	26.6568	26.4244	26.0781	26.2656	26.9716
MA-00173-173	97.2823	23.0817	24.2689	22.6487	24.1866	23.6052	24.6556	23.2079	23.627	23.6854	23.9085	24.8356	24.9925	26.371	26.8265	24.3964	24.758	25.3978	25.2288
MA-00120-121	97.2759	30.1455	29.9056	29.4167	29.9545	29.1914	29.7166	28.9295	28.7798	29.0119	28.3009	27.2105	27.937	28.357	27.0719	27.286	28.056	27.6122	28.2597
MA-00307-1	97.053	31.6278	31.8234	31.4613	31.5109	31.1545	31.4315	30.0445	30.1842	30.0085	29.8087	29.7168	29.4559	30.0196	30.0906	30.2443	29.5831	28.7177	29.7927
MA-00055-233	96.7103	29.173	29.6653	28.0456	29.5541	28.5895	29.4687	24.7399	28.3043	24.9053	27.5297	27.4536	27.2607	27.2118	27.0471	27.6367	27.1087	29.2804	27.5541
MA-00101-610	96.5702	28.6635	28.4901	28.2232	28.23	27.8298	28.3871	26.1461	27.117	27.39	27.0527	26.4926	26.506	27.1232	24.0312	26.2797	25.8399	26.382	26.759
MA-00101-486	96.4018	31.2884	31.2668	30.936	31.1548	30.3088	31.0806	29.3645	29.4685	29.7615	29.7039	29.471	29.0302	29.8393	29.5013	29.5908	28.7172	28.6647	28.9916
MA-00268-122	96.1389	25.4524	26.407	25.2389	26.241	25.8453	25.7417	27.3736	24.784	27.1547	27.7327	27.6363	28.4636	27.0831	27.8141	27.7984	27.9743	27.6464	27.214
MA-00139-32	95.8211	32.0165	32.045	31.6798	32.1783	31.7466	32.0958	30.5248	30.6643	30.6798	30.2085	30.106	30.2566	30.2921	29.9743	30.1296	29.7003	29.8264	30.5389
MA-00184-465	95.7412	24.2138	25.2707	24.0845	25.7649	23.3386	23.6979	23.1933	23.0577	23.2864	22.4725	23.2992	23.1803	22.4282	22.6136	21.8972	22.3352	22.3679	22.3714
MA-00067-149	95.7206	24.882	25.1802	24.9787	24.9762	24.9891	24.6359	23.1809	22.7991	23.1873	23.9499	23.7587	23.6183	23.7209	24.4564	22.2789	22.7279	23.1809	23.1343
MA-00334-95	95.6747	31.3854	31.1099	31.3142	32.3515	31.724	32.6093	32.6528	32.9992	32.8245	33.4458	32.7373	33.0376	33.5641	33.6307	33.5867	33.715	33.4209	33.5867
MA-00320-156	95.6731	24.8592	25.5116	25.3779	25.2566	24.5658	24.7979	23.4885	24.5307	22.7878	23.1289	23.4517	23.5036	23.8077	23.4307	23.5471	22.9178	22.6484	23.7512
MA-00120-207	95.3044	21.748	24.3855	23.4646	22.7045	23.7654	24.4628	22.8863	24.7629	23.7928	23.6492	21.295	23.2726	26.3051	23.3636	26.008	23.2702	25.467	24.3311
MA-00073-304	94.9586	25.5902	26.0186	26.1303	26.8189	25.8089	26.3695	24.0513	24.7186	23.8791	22.8342	24.4475	24.6013	24.8023	24.2106	24.2567	24.8596	24.2459	24.6418
MA-00101-179	94.7145	23.9942	27.1518	26.982	25.9021	24.5082	24.1588	26.1417	22.0834	23.9188	21.9529	24.0545	23.9234	25.1551	22.1246	26.3051	24.4963	24.1484	24.8664
MA-00120-336	94.5833	29.2216	29.0125	28.7252	27.9083	28.1662	28.8799	24.0951	24.1637	26.7308	28.592	24.0747	26.747	26.7517	21.9282	26.6532	22.6851	25.9363	26.628
MA-00101-125	94.5311	21.967	24.1929	23.7229	24.6882	24.8291	24.4417	24.3544	23.2411	24.9081	25.5263	25.6918	25.7023	26.2178	27.0308	25.2217	26.1917	25.919	26.4628
MA-00073-64	94.4329	27.2079	26.9822	27.7841	28.7428	27.092	28.4085	29.1446	28.8845	29.0699	29.6848	29.3204	29.5033	29.8662	29.5699	29.4204	29.4925	29.4039	30.3085
MA-00334-522	94.0919	31.3383	31.8257	31.5423	31.626	31.5244	31.7775	30.3303	30.8394	30.3828	29.7395	29.7271	30.1823	30.1654	29.5711	29.7329	29.4761	29.4131	29.9047
MA-00115-2	93.9534	24.3863	25.1124	24.312	23.8701	24.5486	24.5426	26.0296	26.4724	26.3022	27.9411	26.6404	27.1412	26.5577	25.213	26.2016	27.0869	26.712	26.7915
MA-00334-402	93.8995	24.0132	24.0537	23.7921	25.2071	25.5727	25.34	26.7138	25.5376	24.5247	27.4733	26.3077	26.9743	25.8864	26.078	27.199	27.3073	26.6691	27.7514
MA-00112-311	93.8244	27.1874	27.9869	26.9512	27.7467	27.7223	28.2101	26.8782	27.9337	27.2867	27.2019	26.1297	25.979	26.6374	26.2868	26.0974	24.9809	25.8133	25.7987
MA-00090-331	93.3125	24.0351	23.246	23.2071	25.2764	26.0167	24.0887	26.2672	25.7157	26.6118	26.1845	26.6828	25.3977	24.8889	25.935	26.5938	25.6012	25.172	26.1113
MA-00297-232	93.2579	27.9602	28.585	27.1248	29.0766	29.2509	29.556	29.785	30.4846	30.2777	30.4869	30.5504	30.614	30.6691	30.6255	30.4089	30.195	30.2327	30.6019
MA-00189-290	93.1218	26.9563	26.9581	26.746	25.9686	26.2532	27.6513	24.2595	24.6122	25.0931	25.1174	25.3079	24.871	25.6717	25.0641	21.4411	25.8274	25.2302	25.8112
MA-00210-64	92.9199	22.5467	23.5165	23.6289	23.546	24.5108	24.0263	24.3279	24.3226	25.3606	25.0429	25.9853	25.6457	26.0133	25.4393	26.2003	25.5843	24.8579	25.8738
MA-00153-388	92.8902	29.3689	29.4888	28.6346	30.2588	29.9624	30.1394	30.5764	31.3783	31.1486	31.4988	31.4538	31.7193	31.6503	31.7535	31.6289	31.2479	31.7459	31.7692
MA-00067-324	92.8086	23.741	24.2488	23.9509	24.653	22.3052	24.0741	25.1881	25.6758	24.8781	23.5459	25.6237	25.6408	26.0285	25.7529	26.3179	25.1105	25.2321	25.8149
MA-00090-284	92.805	25.0747	25.3326	23.4265	25.2826	24.2969	25.4975	22.2832	24.4646	25.0118	24.3075	23.7908	23.1742	22.4969	22.1388	23.9046	22.0512	22.3783	23.4142
MA-00190-48	92.6607	29.1886	28.9973	29.468	29.2443	28.4405	29.0165	30.0677	30.3566	29.9207	30.7417	30.6013	30.7322	31.3463	30.8992	30.9973	30.6684	30.2308	30.6751
MA-00184-543	92.2203	27.9133	28.0604	27.382	27.4417	27.1706	27.5765	26.0092	26.7095	24.9812	25.5974	26.1263	25.8734	25.9065	25.5513	26.193	24.9718	25.789	26.246
MA-00112-173	92.1795	27.6899	27.9528	27.4481	27.4827	26.8042	27.2023	25.4851	24.709	24.9343	26.2819	27.083	26.4749	26.5355	26.3194	25.8433	26.0436	26.2971	27.2149
MA-00334-579	91.756	24.1758	23.3961	23.7229	24.1909	24.0369	24.3721	24.0777	24.6405	25.0597	24.5345	23.946	22.2926	24.2807	24.0562	24.8884	21.4165	22.0282	22.8702
MA-00268-54	91.7433	29.7391	29.6918	29.3119	28.8811	28.9792	29.2229	27.2127	27.4632	27.9513	28.7554	27.5136	28.1731	27.4263	27.4587	27.2789	26.8024	20.2745	27.3529
MA-00162-46	91.5818	26.3436	26.4434	26.3235	26.9563	26.2748	27.2582	26.5734	27.4508	27.4158	27.8824	27.4381	28.2316	29.2682	29.4878	27.9705	28.3672	28.4406	28.6114
MA-00153-553	91.565	27.8036	27.5039	26.6258	27.3204	26.8567	26.773	25.9897	25.4922	26.4713	27.2903	27.225	26.7981	29.1485	29.9905	27.2839	27.9463	27.4279	29.2351
MA-00184-263	91.498	32.2916	32.4895	32.2258	32.4904	32.0313	32.3591	30.8961	31.1177	31.1064	30.8439	30.4823	30.791	30.8875	30.2492	30.5323	30.4299	30.3539	30.6523
MA-00162-69	91.428	25.5876	26.6858	25.537	25.1155	25.5839	25.4061	24.7826	23.9022	24.726	24.2536	25.611	22.9826	24.3195	23.9423	22.831	23.133	23.7463	23.014
MA-00101-143	91.0601	30.0105	30.4835	29.8975	30.6148	30.4572	30.5384	29.0863	29.6764	29.4539	28.9272	28.233	28.6304	28.8157	28.6648	28.8656	28.4966	28.6568	28.1904
MA-00055-204	90.9885	29.2289	29.2574	28.9519	28.7054	28.4982	28.4977	26.7095	27.9631	26.7962	27.1539	26.7749	27.0108	27.1511	28.4563	26.9052	27.5576	26.881	27.4998
MA-00153-584	90.8637	30.4506	30.6719	29.9889	30.5676	29.8311	30.4749	29.2124	29.2634	29.0985	28.3724	28.4205	28.6769	28.4166	28.0761	28.4017	28.3397	29.2706	29.1413
MA-00323-129	90.8502	27.5217	28.2878	26.8367	28.6898	27.2281	27.452	26.6371	26.5685	26.5496	26.4056	26.1068	25.2352	26.9109	25.2773	25.2382	23.2132	29.5701	26.6333
MA-00334-406	90.2925	22.9493	21.602	24.5168	22.7733	23.9887	23.9541	24.849	25.1963	24.259	23.9096	24.6923	25.7414	25.6831	25.725	25.6499	23.4127	23.7459	23.8223
MA-00153-186	90.0046	33.9677	34.2193	33.7946	34.4702	34.0832	34.4763	33.5527	33.8792	33.7047	33.0598	33.1325	33.1399	32.9537	33.0885	32.8335	31.8349	31.8382	32.1351
MA-00320-119	89.9545	26.6447	26.8693	26.6391	27.2101	26.6188	27.6525	24.764	24.8732	23.7764	23.2012	25.3174	25.4497	24.6752	25.4408	25.2553	24.5296	24.8649	24.2067
MA-00213-541	89.7038	31.8308	31.8443	31.4479	32.5325	32.0701	32.4334	33.0462	33.2062	33.0963	33.5296	33.6735	33.6735	33.9242	33.715	33.7252	33.715	33.8138	34.1753
MA-00189-363	89.4772	26.5479	27.0528	24.437	28.8056	29.0658	29.0572	29.7981	30.0312	30.0696	30.4549	30.1637	30.3872	30.5189	30.412	30.3938	29.4995	29.7897	29.8263
MA-00213-275	89.4023	23.0151	23.7813	23.4308	23.5426	22.1343	23.1047	24.5106	24.82	24.3717	25.037	23.5495	25.2021	25.2868	25.3234	24.8118	23.679	25.3508	24.8149
MA-00334-304	89.2968	30.5146	30.3939	29.9096	31.4902	30.0437	30.4823	29.1306	28.8738	28.6649	28.4332	28.0967	28.8604	29.0528	28.8114	28.8879	28.2323	27.7702	28.0804
MA-00326-131	89.2832	26.698	26.1555	26.3034	24.005	26.1818	26.4072	25.7885	25.2374	26.0295	24.3602	25.3178	26.2033	25.4501	24.0974	24.3805	21.597	24.3877	25.0038
MA-00206-81	88.9437	28.0225	28.3192	27.0538	27.9286	28.0673	28.2445	26.302	27.3655	27.3844	25.8621	26.213	26.4047	26.7572	26.262	26.3424	25.9971	25.4976	25.7415
MA-00184-568	88.8325	27.942	26.9436	26.4134	27.4012	27.2454	28.2589	28.8215	29.1246	28.6816	28.926	29.3458	29.4419	29.3557	29.1999	29.1958	29.3833	29.2765	29.4631
MA-00182-324	88.7302	26.6476	26.4989	26.3773	26.066	26.4189	26.5803	24.5978	23.6649	23.3233	25.2515	25.1009	24.8867	24.9048	25.2628	25.9883	24.9801	25.8014	25.8947
MA-00067-176	88.519	25.7741	26.8832	25.771	26.6285	25.1863	25.5433	24.2139	25.7606	25.907	24.7424	24.4201	23.8564	24.0958	25.2665	25.193	22.8215	24.3583	24.1238
MA-00297-530	88.5007	26.1459	26.7019	26.3782	27.1782	26.6381	27.543	28.1962	28.941	28.2899	28.9543	28.3524	28.3319	28.5226	28.4506	28.5128	27.5534	27.9618	27.8347
MA-00213-67	88.3783	22.2082	22.2978	23.4136	23.35	22.6081	22.8184	23.397	24.2686	22.9201	24.3408	24.6133	24.3058	24.6397	24.768	24.9189	24.1948	23.1135	24.2022
MA-00101-260	88.24	26.3223	26.8428	24.8027	27.034	26.4209	26.806	27.8912	28.3798	27.7439	28.2402	28.2937	28.5745	28.7754	28.5768	28.374	27.8983	28.5208	27.9873
MA-00153-353	88.1475	29.786	29.9147	29.8595	30.7421	30.3738	31.1603	31.2053	31.4919	31.2358	31.7849	31.8652	31.6157	32.1368	31.7145	32.1553	32.1188	31.6279	32.3922
MA-00090-140	88.1303	23.6578	23.7676	24.1667	25.2263	23.8577	23.7493	23.7773	23.9766	24.5009	26.5493	26.5482	24.8349	25.3458	26.6581	23.9164	25.9532	25.5687	26.3472
MA-00073-664	87.7095	26.2575	26.6773	26.5026	27.2125	26.8209	26.1087	27.6115	27.8224	27.5239	28.3479	28.0279	28.288	28.3893	28.469	28.393	28.5187	28.707	28.9784
MA-00023-14	87.6029	24.9094	24.8411	24.7529	25.3657	24.4404	22.4459	24.7111	26.4251	25.1488	26.4698	24.6241	26.6312	27.5801	26.4906	24.9798	25.4533	26.5628	27.2356
MA-00101-30	87.2628	23.5446	23.749	24.2789	24.978	24.8965	24.3045	24.9807	25.4386	23.6583	25.9454	25.7038	25.0281	25.6079	26.2084	25.187	25.8486	25.8525	26.8483
MA-00090-78	87.0709	23.917	25.0287	23.3041	22.6069	24.0323	22.3411	22.444	22.6298	20.6746	19.9452	22.8042	22.3929	20.9314	23.6312	22.9529	22.434	23.5715	23.267
MA-00073-167	87.0066	28.2968	27.7547	27.5985	27.3544	28.043	28.6179	27.0401	27.2558	27.2353	25.7936	25.4748	25.887	27.2138	27.7882	25.9019	27.2028	23.2706	24.6217
MA-00213-335	86.9347	27.0195	27.0791	27.4742	27.7972	26.5309	27.2156	24.44	24.967	25.6389	25.6349	26.8464	26.5773	28.9768	29.9492	26.6158	27.735	27.558	28.1643
MA-00112-134	86.8396	28.5166	28.913	28.2498	27.2303	26.9493	26.6154	26.1393	26.4822	26.0338	26.1702	26.7912	26.328	26.9693	26.9526	26.5166	23.1469	25.3927	26.3924
MA-00120-536	86.6046	25.206	25.9897	25.387	27.3868	25.9794	26.6907	22.9631	26.7013	23.9316	23.6023	25.8863	26.6826	26.5257	24.5558	24.3254	24.0433	23.7432	24.3912
MA-00320-125	86.4403	24.1925	25.0792	25.1884	24.2901	24.5617	24.1541	25.4856	25.8274	25.5526	25.8726	25.7623	26.1049	26.8389	26.7803	25.2355	25.6101	27.2391	26.7905
MA-00297-181	86.2228	22.7449	27.8637	27.4342	28.3047	28.4273	28.6681	28.9311	30.0921	29.2518	28.388	27.533	27.6512	28.3603	28.2529	28.2489	27.1838	26.7695	27.2161
MA-00189-280	86.1447	24.5706	24.0668	22.5071	23.5266	24.1843	24.351	23.1502	22.8795	23.067	22.9956	21.6435	21.1196	22.978	22.992	22.9522	21.5283	22.3821	22.037
MA-00206-33	85.7891	31.5618	31.7547	31.1491	31.5992	31.5738	31.5669	30.3724	30.7542	30.6101	30.1244	30.1085	30.2203	30.1619	30.1517	29.8931	28.8844	29.1568	29.5736
MA-00184-557	85.5402	21.276	24.2623	23.8461	20.5389	22.576	21.2767	24.4131	24.5908	24.422	20.5008	23.9042	25.2773	24.9629	25.1361	25.1245	25.1937	25.0423	25.7538
MA-00101-499	85.4435	25.6259	26.704	25.473	26.255	25.2586	24.6891	25.8086	24.9943	25.926	24.5171	25.4042	24.8219	25.0391	23.8762	23.5369	22.0513	23.1268	24.6273
MA-00213-416	85.2392	22.1336	24.2325	24.5513	24.3206	20.6338	24.9009	22.888	24.4256	20.3404	23.4565	25.3075	24.0485	24.9366	23.9228	24.9603	25.8227	24.2009	23.9106
MA-00297-107	85.211	23.681	23.0785	24.3503	25.7511	25.4835	26.048	25.6564	26.2627	26.1174	25.1361	24.7434	25.5007	22.6994	21.9437	23.7217	24.4232	21.1208	22.9693
MA-00101-153	85.09	29.4087	29.4804	29.3884	28.8672	28.8904	28.9032	28.2614	28.4483	28.358	28.1129	27.8058	27.7777	27.7985	27.6668	27.5416	26.7524	26.8448	27.5064
MA-00067-112	84.9752	27.7174	27.9373	27.5345	27.2185	27.6836	27.6766	26.7108	26.4263	27.222	26.7125	25.9186	26.4572	25.6193	26.4532	26.2152	25.346	24.5137	25.6697
MA-00297-341	84.9603	26.3106	26.2041	25.4087	26.0958	25.4125	25.6812	23.8708	23.7962	23.9831	24.0105	23.7524	25.4013	23.9962	24.3211	24.0174	24.1928	23.7682	23.9973
MA-00334-356	84.6988	24.3061	24.2716	24.1798	23.3333	24.9276	25.6794	22.1099	22.3883	23.3307	22.244	22.6699	22.0762	23.4026	23.6404	23.0212	23.582	21.9203	23.3636
MA-00320-164	84.6689	26.9239	26.0774	25.4039	25.9223	25.8353	26.4413	25.4137	25.3092	25.6949	24.2411	24.9526	24.514	24.7267	22.6162	24.4327	24.8361	25.075	24.7979
MA-00334-276	84.5918	25.5035	25.4543	28.1658	28.0498	24.2614	22.9187	28.0951	25.1964	26.3649	23.8107	23.6153	25.8487	23.4182	24.711	27.4149	25.3922	23.3094	25.8886
MA-00067-294	84.5326	31.3435	31.4906	31.1482	31.5537	31.1901	31.5342	29.6403	29.2753	29.8244	29.2396	28.5393	29.8888	30.2849	29.7139	29.5762	29.9335	30.0254	30.323
MA-00139-295	84.3233	28.1173	28.2703	28.0835	29.2818	28.9193	29.2932	28.5737	26.3177	28.3474	28.8792	30.2387	29.804	30.099	29.5601	29.8815	30.0267	29.3418	30.4554
MA-00067-55	84.2756	28.434	28.7942	28.4128	27.7191	28.0761	28.7592	26.8957	27.9239	26.9468	27.0348	26.9284	27.487	26.8173	27.0197	26.5777	25.7746	26.0328	27.2828
MA-00297-494	84.0668	31.6959	30.957	31.038	32.7896	32.1299	32.3532	33.7553	33.7553	33.8883	33.6088	33.6307	34.1901	33.9242	33.3033	34.3033	32.7745	32.5514	32.2495
MA-00270-216	84.0566	26.9636	26.9298	26.4136	26.7811	25.5787	25.8641	24.8683	22.876	24.7793	24.1163	25.5398	25.3669	26.2477	25.9081	24.5833	24.787	24.8037	24.4077
MA-00320-47	83.8566	24.3724	24.9056	23.5479	24.4961	22.7406	25.4672	25.3979	26.5611	26.3545	26.0578	26.9699	26.5607	26.1731	26.34	26.5293	25.6752	26.0014	25.7112
MA-00073-381	83.6491	23.8721	25.4461	23.0484	25.4412	25.7124	24.372	25.9426	27.0509	26.0819	27.106	27.3261	27.1147	27.3467	27.1368	26.672	26.8751	27.9276	26.9072
MA-00055-153	83.5033	29.7904	30.1763	29.7501	30.5886	29.9427	30.2136	30.7042	31.203	31.0785	31.4081	31.6405	31.5599	31.9048	31.5326	31.6551	31.8142	32.1276	32.639
MA-00297-226	83.4591	26.2746	26.2002	26.1287	25.3209	23.9167	26.0122	23.9131	24.0537	23.5189	24.766	23.872	24.1806	25.3346	24.2641	25.7528	25.6134	26.0412	24.0984
MA-00073-329	83.357	22.9442	24.4723	22.5494	25.2326	22.8348	23.83	22.3714	23.8833	24.1608	24.2639	25.4769	25.3731	24.859	25.8033	26.117	23.3191	25.5799	26.4166
MA-00184-197	83.2664	26.7029	27.278	26.559	27.7399	27.5339	28.0035	27.7625	28.5815	29.0068	29.0626	28.9519	29.3367	29.2983	28.9607	29.1797	29.0265	28.7891	29.1516
MA-00153-171	83.0237	27.504	28.1778	27.9226	28.1068	28.1042	27.8061	26.9124	26.9401	27.0835	26.1595	24.6716	25.346	26.718	26.9675	26.6661	25.9436	26.0061	26.0423
MA-00189-441	82.9875	29.2279	29.2326	28.4457	29.0584	28.6607	29.4673	28.3157	28.454	28.1276	27.8038	27.7378	27.6188	28.1319	27.5867	27.601	26.8221	26.4809	27.2531
MA-00090-434	82.9668	31.2362	31.4154	30.8433	31.3083	30.8156	31.3069	29.658	29.8951	30.0641	29.6786	29.6319	29.4642	29.4119	29.9448	29.6554	29.0912	28.9569	29.3736
MA-00182-204	82.9317	26.929	23.9893	23.7925	27.4935	25.3926	27.5259	28.1761	28.7639	28.195	29.1235	29.0277	28.8658	29.0246	28.8603	28.681	29.1934	28.3373	29.1144
MA-00073-274	82.9179	27.2751	27.9285	26.8567	27.5201	26.8707	27.0418	26.068	26.7512	26.3453	26.7268	25.0632	26.7566	25.885	25.7225	24.5194	25.5534	25.5096	25.2224
MA-00173-89	82.6538	25.8436	25.7118	26.2081	26.2185	26.063	26.4968	23.7971	24.8717	24.1902	24.5435	24.026	24.6317	24.4368	24.6227	23.8929	23.8634	24.6094	24.3255
MA-00125-1	82.6367	25.4877	25.5626	25.8639	27.4143	26.7208	26.8539	26.9287	27.6806	27.9011	27.19	27.6963	27.9252	28.25	28.2253	26.2898	28.5071	27.6182	28.1449
MA-00270-80	82.0541	25.7115	25.3467	24.6869	26.3586	25.0124	25.5573	22.3732	21.8325	23.2519	24.2192	24.2714	23.4844	23.9427	23.7581	24.4213	23.0941	24.4863	23.9812
MA-00090-441	81.6048	25.639	26.2791	25.2906	22.4209	23.2446	26.1759	23.372	25.4326	28.6741	24.1613	24.1198	26.6256	24.3352	24.9502	22.2969	23.7101	18.0115	22.4192
MA-00210-156	81.3753	35.3956	35.5698	35.2689	35.8974	35.3502	35.7922	34.1901	34.7453	34.5296	34.0101	33.9848	34.0592	33.8328	33.933	33.7453	33.5062	33.87	33.9153
MA-00073-290	81.3286	23.6195	25.3459	25.6567	26.1234	25.4987	25.6234	25.1221	25.4586	25.4106	26.4643	25.9125	26.4661	27.5135	27.2843	27.4208	26.8441	26.6216	27.1503
MA-00072-66	81.2331	27.2017	26.6934	26.6245	25.66	25.0872	25.6471	24.7472	24.616	24.3821	25.0673	25.3171	25.796	25.6699	25.3834	25.2374	24.2221	24.4153	24.1976
MA-00213-573	81.1386	26.2652	26.2674	25.6124	23.2807	27.2253	26.315	23.3754	23.871	23.9453	20.6417	22.8833	24.1315	23.528	24.2202	24.4404	23.4256	24.0226	24.0085
MA-00162-417	80.8765	24.7073	26.4216	26.303	25.0187	26.6036	26.8834	27.4922	27.748	27.8427	28.6823	28.7664	29.0859	28.9863	29.0207	28.743	28.6748	27.7857	28.2913
MA-00334-463	80.797	26.734	27.462	26.0563	26.8637	26.658	26.4971	25.3726	25.5598	24.461	25.2409	23.6348	25.5305	23.3924	24.4053	24.9418	24.5459	25.4407	25.8226
MA-00139-45	80.7465	25.8864	26.4068	26.5573	26.3967	25.5026	26.5463	24.4259	23.9308	25.0545	25.2869	25.0564	24.902	24.1155	25.7236	24.7529	24.2366	23.8827	25.1285
MA-00101-261	80.7238	26.9983	26.6531	26.9246	26.806	25.71	25.0535	23.3625	25.4166	24.3786	23.8132	24.4531	23.6633	24.8876	25.0578	24.3256	24.5456	24.2564	21.9409
MA-00073-48	80.5319	27.4702	26.448	26.8823	27.5744	26.7956	27.2522	26.5832	26.7128	26.4647	25.6794	24.3127	25.8501	24.3108	26.8661	25.186	22.6843	24.65	24.155
MA-00101-337	80.4998	26.7102	27.2853	26.6457	27.1546	27.285	27.7487	27.3005	26.0607	27.1679	27.1755	27.2629	26.1613	24.895	26.0205	26.8533	26.0987	23.8479	24.7095
MA-00153-9	80.3004	28.218	27.5864	27.211	26.9647	25.6775	28.5291	27.4183	27.3719	26.9915	26.3051	23.6691	25.6286	26.8931	26.6668	26.4094	25.639	26.3364	26.4656
MA-00334-160	80.1935	28.3168	28.4137	26.8811	27.5398	27.646	28.0775	25.653	26.7714	26.8374	26.1176	26.4183	26.4943	26.1023	26.5751	26.1097	25.7411	24.6178	25.9553
MA-00153-629	80.064	27.5026	28.6363	28.0272	27.9838	27.7931	27.4766	25.6472	25.5232	26.0843	26.0228	25.8928	26.7223	26.2463	26.515	26.1848	25.803	25.1037	25.8414
MA-00334-536	79.9894	22.2051	23.7576	22.5113	24.4252	23.2381	23.3541	21.7809	22.2453	20.5103	22.4603	22.8387	23.0462	23.6822	24.964	22.9197	23.4067	22.9561	23.4373
MA-00326-200	79.9499	27.2922	26.295	26.0016	26.3616	25.7038	25.7958	24.9082	24.9152	23.8306	22.2608	24.7473	24.6874	24.7106	25.089	24.309	24.5445	22.9699	24.9331
MA-00213-450	79.8932	30.8153	30.9117	30.8061	31.4569	31.3879	31.8792	32.3636	32.3827	32.3271	32.7168	32.7406	32.7216	32.9056	32.8406	32.7981	32.551	32.6307	32.6858
MA-00213-539	79.5737	29.4068	29.4483	28.7537	29.1397	28.4299	29.1239	27.9355	27.3104	27.1529	27.0073	26.8601	27.5188	29.5926	25.9906	27.1351	27.3297	26.3783	27.7018
MA-00055-77	79.4144	27.0611	27.72	26.9408	27.2416	27.0467	27.5298	28.0911	28.2883	28.3063	29.1217	29.1796	28.858	28.7151	28.6879	28.9685	28.5913	28.7184	28.672
MA-00213-165	79.3917	28.9306	28.7268	28.69	28.8997	28.1954	29.726	28.8192	28.6105	28.265	27.8372	27.7936	28.6796	27.674	27.6022	28.0494	26.8577	25.8462	27.2716
MA-00090-524	79.3215	25.5031	27.7255	26.6599	27.0067	26.7277	27.2451	24.8376	26.0147	26.0636	25.7278	25.2618	25.6764	25.1368	25.9423	25.2493	24.4173	25.1821	24.804
MA-00189-505	79.0707	24.265	24.2527	22.4092	24.0676	23.8603	24.2853	23.2404	22.8296	22.2409	22.548	24.0623	23.4477	24.8787	24.7102	23.9884	24.6446	26.0024	24.6949
MA-00055-340	78.9254	34.13	34.2828	33.7453	34.7099	34.3033	34.5698	33.9848	34.1828	34.2759	33.5641	33.5978	33.7453	33.5527	33.4209	33.16	31.7928	31.9058	32.5163
MA-00334-190	78.8391	26.4988	26.4392	26.6292	26.4119	26.4909	26.8924	26.5232	27.3481	26.7643	26.3281	26.5326	26.7582	27.14	26.2054	23.7496	22.9576	23.7892	26.6087
MA-00272-1	78.665	23.7744	24.8735	23.4702	25.208	24.6905	23.9249	24.4105	24.2316	22.999	24.1127	24.6826	24.7372	25.6902	26.8682	24.9078	25.9636	25.8055	25.1294
MA-00111-29	78.5927	32.1451	32.1926	32.0368	32.2797	32.0737	32.5404	31.3617	31.3087	31.3724	30.7867	30.7129	30.5844	30.9479	30.2759	30.5409	30.3815	30.2344	31.0272
MA-00139-307	78.5864	25.6009	25.7669	26.5657	26.8603	26.8967	27.2041	28.5021	27.6343	28.1597	28.5076	27.704	28.0288	28.5626	27.7083	28.2426	28.9277	28.5105	29.0402
MA-00182-24	78.4776	27.1343	27.673	26.8724	26.391	26.6425	26.4569	26.8246	26.9749	27.1163	27.4017	27.8429	27.4459	28.4558	28.5682	28.5	28.6926	28.1237	29.2793
MA-00162-390	78.3618	26.2895	27.2584	26.5605	26.1754	26.8883	26.3862	25.4107	25.738	24.0791	24.3505	25.2118	25.2346	24.2162	24.2898	25.2885	24.5577	25.2187	25.9014
MA-00297-459	78.2793	26.4194	26.7645	26.4316	26.4529	26.7327	26.9724	25.9081	25.5978	26.0703	25.2888	26.073	25.8918	25.6576	25.5455	24.3595	24.3896	24.2848	24.8096
MA-00213-188	78.2767	24.1334	24.5396	23.5221	22.9804	23.5103	23.8137	21.712	22.5203	22.7454	22.5788	22.0026	21.2461	22.0334	23.9636	21.8953	22.1202	22.3553	22.67
MA-00210-92	78.0775	28.5748	28.7861	28.2343	28.1069	27.3967	27.8765	24.7275	26.2525	25.9012	25.2234	26.9058	25.6932	23.5894	26.9369	26.5932	26.6136	27.4895	27.7195
MA-00213-60	77.9088	29.5519	29.6853	29.2598	30.2988	29.8492	30.3105	30.8481	30.9485	31.1362	31.5343	31.525	31.4766	31.4433	31.7564	30.945	30.9537	30.5335	31.4456
MA-00213-17	77.7098	24.3565	24.5716	22.6033	23.3728	25.2364	26.1196	22.8348	23.1536	22.7545	25.6961	26.2003	23.585	23.2388	23.7331	23.6317	23.277	23.4442	26.2861
MA-00101-219	77.6031	30.0612	30.5657	29.9289	31.2678	30.3738	30.9045	31.1061	31.7637	31.3002	31.7338	31.9598	32.2725	32.1412	32.2576	32.0979	31.9822	32.7016	32.5892
MA-00055-65	77.233	30.3241	30.4919	30.0737	30.6929	30.4721	30.627	30.8408	31.5101	31.5196	31.4598	31.6469	31.9647	31.947	31.7543	31.9418	32.4276	32.5513	32.8252
MA-00112-206	76.9373	22.9215	24.6023	21.9727	25.4016	24.3869	24.0562	25.9152	26.6655	26.2872	27.1242	26.5505	26.6939	26.4263	26.5047	26.7924	26.233	26.1269	26.8304
MA-00317-5	76.6762	27.2906	27.2224	26.2997	25.6393	26.757	27.1184	25.3637	25.665	26.2006	24.4577	25.1327	25.1879	24.7572	25.3754	25.4493	20.1318	24.0692	25.1136
MA-00112-310	76.4851	29.7736	29.569	29.3929	29.5931	29.3376	29.6887	28.7431	28.5419	28.8666	28.5952	28.2209	28.4712	28.6741	28.4218	28.174	27.3664	27.0555	27.7423
MA-00189-405	76.3613	24.4952	23.7062	25.2532	26.6424	25.3665	26.835	26.7285	26.3262	26.0755	26.8295	27.2266	26.8883	27.3415	27.7058	27.4537	25.8205	25.8426	26.188
MA-00268-74	76.2168	26.3669	26.3558	24.439	25.1601	23.7705	26.4153	24.2103	27.6165	26.2478	26.0083	25.1531	25.3665	25.8049	24.7806	25.0495	22.0087	22.9484	24.5188
MA-00268-203	76.1657	25.2905	25.7139	25.2227	26.727	24.9756	26.0828	24.3541	25.3764	25.0166	25.3265	23.9389	26.4117	24.1647	25.7152	23.739	26.9246	26.8231	27.6255
MA-00120-599	76.1157	25.0354	26.03	24.7022	25.2626	26.2106	25.7812	21.3082	23.2153	24.5945	23.7901	25.4459	25.3798	24.4205	24.734	23.5086	24.1478	24.088	24.1964
MA-00153-149	76.0541	24.2883	22.3601	24.1536	26.2008	25.4997	25.6293	26.9793	27.5583	27.5943	27.2861	27.5584	26.5432	27.8877	26.4368	25.6055	26.2632	26.6381	25.93
MA-00090-405	75.9608	26.1809	25.9432	26.1518	28.629	26.4317	26.0575	25.625	24.946	24.8213	24.9444	24.3492	25.5148	25.4603	24.596	23.9405	23.8453	24.8266	24.3455
MA-00090-547	75.89	23.151	24.994	24.9128	22.573	23.6452	24.4433	22.783	22.5897	22.8552	22.8295	25.8172	21.317	20.8066	24.1067	24.4697	21.485	21.7538	21.8219
MA-00182-23	75.6191	28.0548	27.7759	27.6749	27.7111	27.1634	26.9696	26.1545	25.7192	26.211	26.3433	25.8866	26.1978	27.9945	28.493	25.6968	27.77	27.681	28.129
MA-00162-7	75.4235	27.3388	27.089	26.8209	26.1661	25.7014	26.5115	25.292	24.6547	25.5332	24.7375	23.9625	25.0976	25.3922	25.1872	25.3872	24.0664	25.0542	25.2641
MA-00182-308	75.2978	22.576	24.8266	23.7529	22.7331	22.8146	23.0634	25.4688	23.0877	23.2276	26.2723	23.1449	23.5462	25.6886	25.8335	25.1377	23.6644	23.793	23.7884
MA-00111-43	75.2754	30.8974	30.7467	30.5109	31.3106	30.7533	31.4806	29.8594	29.9821	29.9625	29.531	29.5359	29.5962	29.7321	29.3712	29.5928	29.4245	28.7018	29.5246
MA-00189-283	75.2168	24.9948	25.3689	27.0915	25.8331	27.049	25.8073	25.7692	25.9442	23.5006	26.0336	25.6709	22.0656	23.2303	25.761	22.6462	25.7355	23.2239	24.9821
MA-00182-264	75.1109	23.805	24.7663	20.7194	22.3519	23.6089	23.9874	25.3934	23.6862	26.4078	26.2005	24.1603	24.8352	25.6235	26.0698	24.1746	22.5456	21.9456	26.4232
MA-00055-74	74.9334	23.7736	24.5153	23.9409	23.3192	22.9438	23.8864	24.6019	24.1274	26.5307	23.8954	24.5706	23.6233	25.4397	26.0231	25.023	24.4806	25.4229	22.8535
MA-00153-309	74.8252	28.9149	29.6187	28.8984	29.995	29.7331	30.3762	30.3583	30.7839	30.2915	30.691	31.1487	31.4217	30.8755	31.2647	31.1005	30.7292	31.634	31.0544
MA-00334-401	74.7859	27.3468	28.2086	27.0536	27.3234	26.8265	27.4156	26.0228	26.1502	26.3355	25.8193	24.3053	24.6398	26.0419	25.8541	23.8554	25.2724	24.6064	22.7888
MA-00184-330	74.6685	26.1635	26.449	26.0675	27.3031	26.0145	27.0862	26.3182	25.0378	26.1974	23.7244	24.3789	24.5271	27.0473	25.6779	24.5136	24.7374	25.1088	24.0826
MA-00213-443	74.6329	28.5113	28.217	28.1679	28.5222	28.4706	28.4018	27.0622	27.5935	27.6871	26.8676	27.0401	27.5028	27.7479	27.9616	26.8275	26.6116	24.2395	25.6399
MA-00072-32	74.617	31.4347	31.6057	31.3098	31.6147	31.1115	31.362	30.0841	30.3428	30.4156	29.1315	30.0879	29.3098	28.751	28.9697	29.7474	29.6566	29.9306	30.1955
MA-00184-506	74.5068	25.1132	25.6201	24.0917	26.1951	25.5695	25.5727	25.8011	25.8845	26.7104	25.8964	25.164	25.9712	25.9901	26.4497	26.063	23.9107	23.9276	24.297
MA-00120-390	74.4189	24.8974	25.0508	25.6756	26.4434	25.6716	25.9938	25.7796	26.0775	26.7705	26.1396	24.641	27.1085	26.4108	26.4546	24.685	24.1448	23.3672	24.7228
MA-00184-573	74.1389	30.1216	30.3424	28.1827	30.005	29.049	30.1272	29.9389	31.1828	30.3598	30.8618	30.8454	30.8152	31.8993	31.8886	30.5636	30.8402	31.8117	31.2659
MA-00334-552	74.0279	29.5741	30.4338	30.6288	29.8106	29.4724	30.0377	28.5402	29.0788	28.4682	28.2027	27.8848	28.7329	28.2028	28.1779	28.3694	28.8115	28.6224	29.1353
MA-00153-20	74.0193	28.9649	29.4014	28.7767	29.1082	28.9073	28.5416	27.2212	27.638	27.3004	27.322	26.8238	27.2574	27.0986	27.2597	27.2611	25.8175	26.5885	27.2116
MA-00153-440	73.9339	29.1221	29.6134	28.9828	29.708	29.3507	29.6724	27.2985	27.7798	27.9032	26.5714	28.2749	27.5048	26.8276	27.5835	27.3614	28.3244	28.4127	28.8094
MA-00120-100	73.8747	31.8803	31.8552	31.2854	32.2522	32.0025	32.1036	31.5549	31.1964	31.6022	30.605	30.8831	30.6949	30.8603	30.3964	30.6085	29.6131	30.0372	30.0058
MA-00213-434	73.6912	27.4153	25.8577	27.6564	27.3946	27.2614	27.8448	28.5477	28.4577	28.7972	29.425	29.2287	29.2408	29.695	29.1992	29.2255	29.2109	29.0823	29.5169
MA-00139-182	73.3619	29.3247	29.3969	29.1071	29.4611	29.2482	29.795	28.1298	28.4308	28.7967	27.5805	27.796	27.9216	28.4253	27.0459	28.0544	27.7906	28.5787	27.7764
MA-00326-121	73.3325	25.5374	26.1422	25.2053	25.1127	26.3568	26.1266	25.1118	25.3366	23.5884	27.223	27.2825	26.8358	27.3063	25.7091	25.7009	26.3157	27.7756	27.3222
MA-00153-711	73.0887	26.7439	26.449	24.7957	26.9487	26.2915	26.7846	26.7003	26.7948	26.8879	26.7447	26.318	27.0422	27.0322	25.1489	24.5873	24.5676	24.7462	25.0109
MA-00189-480	73.0124	29.4891	29.1164	29.363	28.8328	28.9429	29.5727	28.5035	28.5903	28.6261	27.8148	27.368	28.0705	28.1227	28.3805	26.8416	27.0224	27.3046	26.2732
MA-00213-293	73.0107	26.0501	26.2567	25.8736	25.0716	25.0524	25.9805	24.1752	25.8307	25.336	27.264	26.7269	27.1457	26.0763	25.517	25.5242	24.2356	23.7411	25.1004
MA-00072-329	72.7587	27.0759	25.4091	25.5265	25.5911	24.9703	27.2603	26.5528	22.9521	26.0202	23.1538	25.4845	24.5757	24.6708	27.4116	25.228	22.802	22.7512	25.1833
MA-00184-544	72.7536	26.7318	26.8928	26.7608	25.5697	26.491	25.8714	24.378	24.9351	25.3182	24.8341	25.2982	24.3643	24.5465	26.3407	25.0549	23.9909	25.4143	24.5975
MA-00213-157	72.7351	24.4182	25.1493	23.8891	25.5787	25.4295	25.9611	23.9371	25.7357	25.1552	23.8643	25.6897	24.2015	26.0004	25.1236	25.46	23.3592	23.1199	23.9327
MA-00297-40	72.7193	29.9254	30.1268	29.7482	29.9499	29.9117	30.3393	29.1663	29.4785	29.229	29.0383	28.8086	28.6677	27.858	28.5591	28.1802	27.3229	28.5767	27.8529
MA-00090-365	72.5899	24.5921	23.7006	24.5176	25.567	22.8947	26.3866	22.4789	22.3505	24.2122	23.7183	24.264	24.2163	23.7214	25.1412	23.8612	24.5854	24.4907	27.3214
MA-00118-2	72.506	25.504	25.8851	25.0177	25.5437	25.004	25.0349	23.7917	24.5587	25.2339	25.0024	25.0199	23.8433	23.7774	23.5784	24.1767	23.8945	24.0583	22.5428
MA-00162-308	72.4285	32.5829	32.8675	32.5586	32.888	32.4116	32.7845	31.5934	31.8476	31.8384	31.5554	31.4253	31.5602	31.3088	31.4615	31.1164	30.3743	30.7069	30.9525
MA-00184-570	72.362	25.2818	25.0004	24.9719	25.8852	25.6204	25.153	22.9692	23.2286	26.0272	25.7607	26.5797	27.1998	25.9205	26.4604	23.27	25.5062	26.2777	26.0959
MA-00173-112	72.2752	29.9025	29.8614	29.3462	30.2265	29.878	30.5142	29.4298	29.5874	29.1454	29.0995	29	28.6979	29.2079	28.021	28.6851	27.8818	27.7754	28.4651
MA-00055-83	72.0996	31.3088	31.4174	31.1783	31.7859	31.2635	31.6798	30.7711	30.7469	30.883	29.9327	29.7984	30.1789	29.9424	30.0764	30.0132	29.5867	29.7363	29.7659
MA-00120-53	71.9267	24.4634	24.6073	22.2764	24.9812	26.2331	23.7285	22.9274	24.8356	26.8827	25.6215	24.2077	26.0419	27.276	25.864	27.7264	25.4376	25.0562	26.4114
MA-00182-361	71.8901	24.3126	25.1871	22.0934	24.575	24.976	25.4299	22.5504	23.6901	24.7845	24.8479	24.673	24.8524	25.4256	24.9546	24.663	23.0338	22.8366	23.3017
MA-00334-546	71.8095	26.9783	27.5764	26.2599	27.598	27.1565	27.7659	28.4279	28.0874	28.3568	28.5431	28.4028	28.9991	29.0431	29.0544	28.9291	29.0081	28.6925	29.2539
MA-00213-468	71.6512	30.3088	30.3507	29.8639	30.5975	30.4234	30.8257	30.1842	30.7301	30.3673	30.0921	30.0811	30.2864	29.9625	30.1606	29.7778	28.4504	28.0887	28.5028
MA-00297-32	71.6365	27.7334	28.4637	27.0855	28.2303	26.5224	27.4973	25.6588	26.5515	26.3519	26.5659	26.5783	25.8812	25.3145	25.3942	25.7362	25.6575	26.486	27.2613
MA-00072-257	71.4251	28.1089	27.8743	28.5234	28.6161	28.3021	29.2574	28.7691	29.0913	29.0341	29.9661	29.6453	29.8481	29.99	29.7642	30.0007	29.9806	29.9592	30.4708
MA-00055-237	71.3942	25.8698	26.3246	25.8373	26.4202	25.3037	26.2505	26.3055	26.7997	26.2727	27.4309	27.1033	27.5095	26.3669	23.7929	27.1735	27.7831	28.1819	28.1881
MA-00182-48	71.3616	23.6932	23.1849	23.8754	23.7742	24.1917	22.8445	22.2629	26.0794	25.688	25.6415	25.3336	23.995	24.9552	24.8485	25.3073	24.6368	25.496	25.9206
MA-00184-273	71.3104	25.4372	24.7709	23.3869	24.6998	24.0136	24.6529	22.1273	22.3171	22.8217	23.162	22.3544	22.9167	22.5375	23.2521	22.5734	24.1175	22.7716	22.9069
MA-00326-73	71.1191	24.4179	23.0647	24.7828	24.1964	25.0206	24.5438	25.2436	25.835	25.0639	23.6904	24.0885	24.8302	25.6934	26.8277	25.8622	26.1374	26.7563	26.4235
MA-00334-268	71.1169	22.6343	22.8712	24.2448	22.5493	22.4992	22.1157	22.437	22.9561	22.4272	23.0967	23.435	22.8206	23.6453	23.1373	23.156	24.9187	24.5751	25.2581
MA-00334-71	71.1035	25.1178	25.3511	23.7998	25.2848	25.7608	25.9295	24.1815	23.6308	25.1755	25.4979	25.6819	24.5474	24.6845	23.7514	24.5458	22.0858	23.7689	23.686
MA-00213-85	70.9187	26.736	26.9854	25.7438	25.5937	25.9432	24.6143	24.8728	24.221	24.214	23.9932	25.147	23.9025	24.6822	23.7794	25.7799	25.2711	25.2426	25.684
MA-00213-619	70.9055	25.6155	25.2427	21.1526	25.9107	25.4406	26.7672	25.3984	25.741	25.7938	23.499	21.9222	25.9195	25.2824	24.5836	25.11	24.5889	23.7791	23.5377
MA-00323-89	70.8394	30.6798	30.6647	30.3862	30.763	30.4415	31.2225	29.3995	29.4545	29.2387	29.3356	29.2335	29.4178	29.166	29.5632	29.0587	29.112	28.7028	28.8161
MA-00073-147	70.7685	29.8514	30.0961	29.622	29.1959	29.2202	29.7797	27.9772	28.0271	28.6259	27.9935	28.1765	28.1703	27.9965	28.6532	28.0792	27.5316	28.1014	28.4421
MA-00072-113	70.6277	22.9768	25.8342	23.5797	26.3559	25.1454	22.2404	25.0309	26.6634	22.4816	27.1404	26.7577	26.9786	27.0972	27.1051	27.4177	27.6683	27.6962	28.2847
MA-00090-383	70.5881	27.9548	28.7888	28.2819	28.2613	27.9598	28.5523	26.5441	27.158	26.84	27.0529	27.3997	26.7196	26.4632	26.6644	26.3135	27.9358	27.7112	27.5765
MA-00182-221	70.5541	25.0908	26.5282	26.2914	26.4136	25.693	26.6491	25.1182	25.7755	24.6824	25.9158	25.2342	25.6853	25.9607	26.6125	23.34	23.7548	23.8034	24.4522
MA-00120-404	70.5261	31.346	31.5558	31.0958	31.3087	31.0228	31.4261	29.9259	30.8964	30.5008	30.001	29.739	29.8978	29.7221	29.8149	29.8077	29.5385	30.005	29.637
MA-00213-436	70.4612	26.3214	25.7366	25.978	26.9158	26.7623	27.4652	27.4113	27.5785	27.6408	28.1645	27.9474	28.3957	27.8715	28.3073	28.11	27.7578	27.5965	27.9395
MA-00101-330	70.4039	24.6396	24.6797	24.5191	25.6472	25.082	24.7128	25.9482	25.9759	25.409	25.9636	25.7283	25.8837	24.2172	23.7163	23.8764	24.1897	24.3776	24.4544
MA-00067-132	70.3514	30.3897	30.4234	30.1109	30.3605	29.9603	29.9516	28.7821	29.2934	29.0182	28.0706	28.8344	28.1568	28.4238	29.2807	28.2564	28.0573	28.0449	28.6517
MA-00303-15	70.2702	28.2904	28.5412	27.3077	28.5538	28.9096	29.187	27.1946	27.5777	27.2125	28.4351	28.1293	28.0422	29.6423	31.0678	28.7862	28.8299	28.9512	28.8796
MA-00184-502	70.0925	27.7229	27.4832	27.4891	27.1667	27.4123	27.7545	28.0073	28.122	25.9179	21.3239	27.5539	23.5892	26.3084	26.1565	26.6079	25.3798	24.7611	26.5235
MA-00297-412	70.053	24.837	26.4234	25.985	23.4686	24.6047	24.6173	25.6169	24.4762	25.6938	26.4502	25.69	25.5036	26.6345	25.7129	24.6154	24.3099	22.7737	23.8861
MA-00326-189	69.8889	24.026	26.6033	26.2002	24.6138	24.6405	24.7279	24.4468	24.0782	24.1917	24.1884	23.9454	24.3189	24.1582	24.0624	24.0168	22.4592	22.8291	22.3889
MA-00323-182	69.7086	27.4704	27.1062	26.6826	27.705	27.3607	27.2005	26.3519	26.8252	27.0266	26.6009	26.4164	26.1422	25.6154	25.5021	26.0511	25.7932	24.3844	24.8895
MA-00189-304	69.706	27.5408	27.3455	26.8799	26.7763	27.1389	27.7906	24.8025	25.0647	25.637	25.7733	25.4908	26.6342	27.284	27.3273	27.0125	25.2697	25.6271	26.5219
MA-00334-434	69.4605	32.9182	33.1954	32.7874	33.3033	32.8174	32.9291	31.8825	32.1869	32.2019	31.7732	31.8738	31.7164	31.6787	31.6927	31.4511	30.8292	31.3043	31.0074
MA-00270-109	69.4161	23.7744	23.9402	22.4464	23.5948	23.6448	24.0912	22.1693	22.8736	23.5653	22.4753	26.1298	27.2391	22.3417	23.0286	22.9425	21.4554	23.7832	21.5994
MA-00120-138	69.3759	28.3863	27.1566	25.9982	27.0502	26.7629	26.8283	27.7564	27.8726	27.6759	27.8108	30.3634	27.6313	28.1286	27.0597	27.358	26.2125	26.3573	24.9786
MA-00213-458	69.3679	25.5935	23.4234	24.5814	25.2258	25.3842	25.8367	24.2848	25.036	23.3081	22.5584	24.2985	22.6008	24.6849	24.0239	23.5827	21.9528	23.2233	24.7607
MA-00073-641	69.3371	31.2979	31.5808	31.19	31.7386	31.0758	31.127	29.3923	30.2922	29.778	30.0054	30.0251	30.0854	29.9163	29.4463	29.9143	29.1963	29.4905	29.5525
MA-00112-24	69.2609	25.8425	25.2281	25.2601	26.771	26.7141	25.8217	26.7525	26.9671	26.8198	27.563	27.3323	27.6558	27.5565	27.5445	27.1607	27.4888	27.3937	27.6849
MA-00139-336	69.189	23.7391	24.532	25.3623	25.6702	25.0582	25.0517	25.0684	26.9098	26.827	28.2135	23.9977	27.4521	26.9018	23.8768	24.0581	24.6577	27.8376	26.1046
MA-00213-431	69.1728	28.0771	28.1276	28.2178	29.1232	28.3146	28.5188	29.3335	29.7696	29.6811	30.0148	29.9275	29.9104	30.1153	29.9382	29.7711	29.3044	29.3914	29.8287
MA-00153-49	69.1549	33.8234	34.0512	33.3828	33.8608	33.5062	33.9677	32.5365	32.949	32.8526	32.5165	32.4324	32.703	32.5943	32.393	32.4417	31.6743	31.8027	31.9943
MA-00320-170	68.9972	24.319	24.688	24.4141	25.1034	25.2287	26.3229	22.389	25.0334	22.7376	25.6711	26.315	24.7405	25.3709	26.3254	24.8911	25.1443	24.3799	24.5442
MA-00120-343	68.9951	24.9542	25.5549	25.5609	25.8032	25.7766	26.2948	26.8617	26.761	26.9284	26.7077	26.4669	27.3743	27.3204	27.4724	27.0973	27.4315	27.1854	27.7617
MA-00189-351	68.985	24.3924	24.2394	24.194	21.4937	22.2566	25.8132	23.8673	22.852	20.8549	23.1559	20.9748	20.9006	22.0061	24.747	24.1685	23.5489	24.5684	24.0277
MA-00112-195	68.9636	26.2839	25.8567	24.6249	24.5353	25.2137	25.7375	25.3075	26.5942	26.178	24.9512	26.0079	23.355	25.2307	23.5354	25.0554	23.9446	23.0793	22.8949
MA-00213-452	68.9557	26.7037	26.7962	25.3163	26.7192	26.5155	26.8051	25.6679	27.1358	25.9036	25.2808	25.6867	24.3973	25.2108	24.0491	26.1233	25.502	24.2337	23.2085
MA-00090-427	68.9329	28.8395	29.4021	28.5099	29.9111	29.8583	30.2263	30.5344	31.0487	30.7526	30.6787	30.8507	31.089	31.2326	30.9319	30.7738	30.7946	30.7297	31.0831
MA-00139-342	68.9204	25.8707	25.8006	25.7501	25.6661	25.4039	26.6838	26.2249	27.6577	27.5359	27.1168	27.8318	27.3182	27.5988	27.699	27.3783	27.6774	27.6649	27.805
MA-00184-442	68.7772	22.774	20.6356	23.7471	24.3783	23.7822	24.0863	22.8327	25.4854	23.6066	25.1124	24.3637	25.0724	24.8731	24.8567	23.2475	23.9677	25.7166	25.4317
MA-00153-303	68.7496	26.0534	25.6241	24.6835	26.5271	24.257	25.0336	26.1976	26.6363	26.5206	26.6946	26.5331	26.4716	25.9919	26.8073	24.4167	24.6597	23.7557	23.5105
MA-00120-196	68.544	27.8694	28.3359	28.3558	28.4787	28.1216	27.4724	26.2517	26.4026	27.7971	27.7238	26.0985	26.6538	27.4046	27.4196	25.5873	26.1411	25.7572	26.7154
MA-00334-114	68.4452	33.8515	33.3956	33.8608	34.972	33.7453	33.8422	35.3535	34.9848	34.9417	35.4115	34.8186	35.327	35.4853	34.7994	35.0184	33.4823	32.9045	33.8422
MA-00334-161	68.3454	25.8609	25.9917	25.1633	25.8771	25.005	26.0895	23.8912	24.481	23.9774	24.1786	24.0053	25.0486	24.2506	24.3601	23.8084	24.6653	24.3176	22.9795
MA-00090-243	67.575	25.5492	26.117	25.8113	25.9045	25.1589	25.9862	23.8867	25.1384	25.2863	23.931	23.3723	24.5971	24.9317	24.3843	24.6675	23.4289	23.3295	24.397
MA-00184-399	67.5533	23.1089	25.1334	25.6073	26.64	25.812	26.5815	27.2575	27.2239	26.9239	27.5659	27.5929	26.9709	28.0387	27.5039	27.8297	27.4508	28.0807	27.657
MA-00073-602	67.4898	28.4398	28.2152	27.31	28.3268	27.654	29.1556	27.1588	26.5189	26.0425	26.3035	26.2688	26.7958	26.9519	27.5961	26.926	26.9641	27.0734	28.0785
MA-00073-266	67.4749	26.16	25.4408	25.6226	26.1989	25.6813	25.6229	24.8998	24.8431	24.0931	25.7432	24.6242	25.3839	24.9762	23.1444	23.6994	24.3592	24.9623	24.7541
MA-00073-280	67.3213	24.9647	25.2286	24.4464	25.7715	23.9034	25.0646	25.5542	26.3439	23.7663	23.5997	25.3187	23.5506	26.979	26.2302	25.6764	24.5711	25.9476	26.937
MA-00073-70	67.2267	24.1526	25.3382	24.5363	24.6739	23.0537	22.6152	22.112	22.4263	22.9245	22.6453	23.04	22.4314	22.5107	22.9612	22.7986	22.2048	21.7564	22.49
MA-00210-279	67.2246	27.8065	28.0829	27.1291	26.2288	27.025	27.6339	25.3804	25.6974	25.9651	25.9336	26.2091	25.3836	26.1064	24.9024	26.0483	26.1091	24.6667	25.9137
MA-00189-169	67.2147	32.3275	32.3186	31.8492	32.0521	31.8382	32.3845	30.8477	31.063	31.0083	30.823	30.7466	30.7396	30.9565	30.566	30.6712	30.5129	30.2827	30.7529
MA-00073-363	67.1463	23.5596	23.2236	22.2114	24.4037	24.3788	24.4557	23.3931	23.5488	23.9944	22.9362	23.3935	23.5476	25.6787	24.0593	24.3558	24.7482	25.1548	24.9962
MA-00072-320	67.1109	25.0499	25.5717	23.5932	25.7555	25.7794	25.8303	26.5792	27.4088	27.1549	26.5966	27.0861	27.4872	26.1922	25.9067	26.4799	24.2998	26.0403	26.0888
MA-00072-8	67.0398	21.9746	23.7401	23.4865	22.6804	24.3733	23.4972	21.1833	22.6717	21.5886	22.0338	21.6424	22.056	21.9592	23.1637	22.6442	20.4329	22.112	21.9357
MA-00073-339	66.807	22.3721	22.4207	22.7164	23.0614	22.1019	22.5001	21.8513	23.5453	23.2741	23.4015	24.1193	24.9423	24.4289	23.5705	21.0924	20.7891	21.8477	23.309
MA-00101-309	66.6617	25.8361	26.0433	24.331	25.7191	25.4315	24.8316	23.7331	23.1739	25.5398	24.4811	23.056	24.6163	25.473	25.6289	24.3628	23.181	23.3578	22.8891
MA-00153-443	66.6026	26.2141	26.6161	25.96	26.5067	27.0174	26.6525	25.7499	24.9188	25.7239	24.9971	24.9364	25.1879	23.4514	24.6307	24.7586	23.7978	22.8124	24.9937
MA-00184-206	66.5197	26.3319	26.3665	24.6799	26.1995	25.8927	25.9357	23.2648	24.6038	24.8441	24.4998	24.6779	23.8915	24.7781	25.9229	24.5164	23.6891	24.0725	23.8359
MA-00120-321	66.3965	30.9141	29.8671	30.4207	27.8049	29.9754	30.9496	29.7431	30.1982	30.0201	30.2713	29.5271	29.0573	29.7183	28.1797	28.7575	28.4704	27.5021	28.3067
MA-00334-162	66.3062	26.0434	26.7867	26.5868	26.9047	26.5376	25.7168	24.3281	23.8232	25.3124	23.6706	24.3833	25.4747	20.3684	24.4842	24.3111	24.0202	23.8925	24.7367
MA-00073-435	66.2826	27.6311	28.366	27.4064	29.3525	29.004	29.7468	29.9427	29.8534	29.8877	30.5294	30.739	21.8161	30.3886	22.4576	30.2503	30.0572	30.8238	22.0738
MA-00173-201	66.0277	23.6199	25.2615	24.8685	24.6252	25.0216	23.7514	25.0468	24.8169	25.4942	26.4027	26.8076	25.9497	26.2834	25.003	25.8404	25.7119	25.7518	26.3329
MA-00027-2	66.0271	23.4936	25.3479	24.3397	24.4449	24.4783	26.4259	24.9446	25.4564	26.1791	26.3852	26.6446	27.5841	27.0636	26.2788	26.73	25.3352	26.2017	25.2846
MA-00120-268	65.8612	25.4876	26.3513	24.9234	26.6428	26.8923	26.9935	27.4551	27.8588	27.4888	28.0324	28.078	28.2739	28.2841	27.9007	28.0157	27.9646	27.4033	28.1718
MA-00184-381	65.829	26.0304	25.1977	25.9146	24.9955	23.7686	24.9129	24.1787	23.4311	23.3665	24.0561	24.064	23.8469	23.898	24.6063	24.0038	23.5071	22.5379	25.1169
MA-00190-7	65.7714	30.0282	30.2535	29.6814	30.18	30.2979	30.5464	29.2492	29.7218	29.3807	29.1358	29.735	29.0906	28.9231	28.5474	29.0729	28.2118	28.792	28.108
MA-00101-637	65.702	25.1312	25.2476	23.9039	23.9375	24.8666	23.5478	21.4924	22.4787	23.1563	22.8203	22.5507	23.5439	23.1901	23.9451	21.7604	23.3512	23.5819	23.075
MA-00139-8	65.4626	26.9349	27.7037	27.0565	27.4172	26.7515	27.3545	25.8137	26.078	25.833	26.004	26.2069	25.4297	28.2863	27.8082	26.2569	26.8894	27.4778	27.7832
MA-00213-547	65.389	32.9092	33.011	32.5511	32.9618	32.7086	33.0244	31.9882	32.3227	32.1402	31.642	31.7927	31.6145	31.7551	31.6115	31.6271	30.8338	30.8111	31.2404
MA-00213-212	65.2297	29.0219	29.1886	28.8003	28.8755	28.0412	28.5488	27.8014	28.3269	27.9874	27.9889	27.3925	27.597	27.6899	27.058	27.5307	26.8341	27.1642	26.9496
MA-00297-93	65.0788	28.3535	22.1033	27.7198	28.0949	28.2261	28.9466	28.4332	27.37	26.9493	27.8886	27.174	28.0554	27.9748	27.3467	28.2278	25.8644	26.4121	26.7331
MA-00323-178	64.9361	24.0543	25.3986	24.506	21.5296	26.3097	25.1693	24.1279	25.1472	24.9446	26.7633	26.8206	26.4111	26.8953	27.1259	25.5118	25.8395	25.867	27.4404
MA-00334-277	64.7059	27.1409	26.775	27.2437	28.4425	28.2547	29.7973	28.5341	28.7379	28.0002	28.3014	28.3664	28.3	28.503	27.8895	28.2902	27.0918	27.1902	26.7037
MA-00213-126	64.6956	24.4544	25.5275	24.3097	23.7161	25.2661	24.6915	25.3697	23.9399	24.4171	25.1566	24.3945	26.7416	23.4908	24.4933	25.4295	26.2257	26.9518	26.1012
MA-00184-98	64.659	24.4256	25.8356	24.5717	24.0684	26.179	25.0503	26.5073	26.4697	26.3624	26.3182	26.3779	26.3029	26.4688	26.6471	26.3915	24.5408	24.4123	25.047
MA-00213-370	64.5709	27.6665	27.3997	27.0417	28.6804	28.8336	28.6915	28.4835	29.2492	28.9055	29.3523	29.3103	29.2876	29.7064	29.1565	29.4429	29.5693	29.3491	29.8418
MA-00213-451	64.5692	24.1928	23.2432	23.1485	24.9397	25.4276	25.0626	25.8498	26.8774	26.2106	25.9094	25.6604	24.6675	25.7045	25.4612	25.7562	25.2748	25.6756	25.2566
MA-00067-170	64.4548	23.5532	22.4859	22.3307	22.9372	23.7409	23.0735	22.2046	25.3728	22.8176	21.581	21.7018	23.2049	25.7832	23.0012	21.7545	24.4643	24.4421	24.7795
MA-00153-333	64.3022	30.0854	30.1436	29.382	30.0289	29.682	30.2381	28.5839	29.0445	29.1825	28.3693	28.4475	28.391	28.5211	28.2018	28.7795	28.0182	28.1358	28.6588
MA-00090-306	64.2323	22.3157	22.6744	23.1161	27.2364	25.3416	24.7381	23.5918	24.832	23.9346	24.0039	25.8686	23.1981	25.9472	23.3215	23.9084	20.9147	24.6515	25.1695
MA-00334-113	64.2045	25.3456	25.8307	26.284	26.9823	25.9425	25.0383	26.3072	27.2804	27.5034	27.0445	26.6679	27.4124	27.4574	27.5822	27.2056	27.5538	27.39	27.5359
MA-00213-376	64.143	23.7382	22.7631	24.5995	21.7667	24.4501	24.7389	24.8669	24.646	25.1308	24.2238	25.8846	23.8875	24.9322	26.2824	23.9474	25.1411	25.2864	26.75
MA-00092-3	63.9135	27.408	27.9451	27.4743	27.7711	27.9061	28.0286	28.6464	28.8385	28.7526	29.3368	29.3624	29.2092	29.1756	29.3365	29.3114	28.7647	28.8016	29.409
MA-00139-189	63.5891	32.1319	32.0872	31.8385	31.9249	32.0685	32.379	31.2962	31.4302	31.393	30.8349	30.722	30.9116	30.9852	30.7481	30.9342	29.9527	29.4564	30.4815
MA-00288-45	63.5115	26.0769	26.5042	26.0576	23.7557	26.4684	24.3235	27.0001	27.5494	27.5508	28.2914	27.965	27.9037	28.1629	28.1337	27.7814	27.577	27.1351	27.6519
MA-00153-559	63.4291	27.1917	26.8598	26.1839	26.8274	26.5803	26.7297	25.6183	26.3895	26.2463	26.1726	26.0202	26.0998	26.1544	26.3721	25.9342	24.3911	24.8695	24.2002
MA-00101-385	63.3784	24.3711	24.3992	23.3877	25.4071	25.8755	25.3477	26.3786	25.9625	25.9939	26.1695	25.4991	26.2451	26.2173	25.8651	25.8692	25.3443	24.4914	25.3053
MA-00153-43	63.2475	26.071	26.0286	26.4206	25.8791	25.7854	25.5959	26.163	25.9805	26.5447	25.3544	24.1089	25.9548	25.7566	24.6418	23.5626	23.2697	22.9825	26.2597
MA-00023-32	63.2426	27.6842	27.6852	27.1477	28.3256	28.0164	28.6724	28.6678	29.2155	28.9424	29.258	28.5742	29.0072	29.5382	29.83	29.065	28.9509	29.4311	29.3021
MA-00055-156	63.2032	23.1877	23.7622	21.808	23.963	23.5193	24.2102	22.9113	24.0327	23.7743	25.0242	24.8339	25.008	24.1455	24.8539	23.6148	24.1635	21.2688	24.671
MA-00101-321	63.1922	26.9327	27.265	27.7877	27.5625	26.1532	27.6153	25.1349	26.4142	25.493	25.6497	24.9434	26.0006	26.0609	25.5374	25.639	25.7024	26.3646	26.032
MA-00334-565	62.9577	29.2114	29.4433	28.7536	29.0892	28.7785	29.3714	27.2192	28.177	28.4665	28.3271	27.5799	27.42	28.5011	27.7293	27.4187	26.9035	25.4318	27.7625
MA-00182-187	62.76	22.5724	24.4541	23.7792	25.4434	25.5677	26.2257	25.7341	25.7692	26.565	26.3359	26.6615	26.1928	26.6067	25.9009	26.2739	25.5177	25.4462	24.7504
MA-00334-388	62.7474	23.2574	25.085	21.6195	24.4628	25.0288	23.7671	22.8788	21.8392	22.49	24.9958	23.3516	23.5432	24.0497	23.0415	22.7425	22.2743	21.0681	23.0436
MA-00268-164	62.7262	24.1247	23.8989	23.6881	25.3769	23.9698	25.2655	24.1692	24.4105	24.6064	25.7093	24.5584	25.2875	26.2078	25.382	25.808	24.2293	23.416	23.4415
MA-00334-278	62.6338	29.6437	29.262	29.0853	28.0237	28.5459	29.3345	28.1706	28.0089	28.1901	27.2311	27.079	27.282	29.9385	30.163	27.5213	28.9992	28.283	28.3551
MA-00120-42	62.4637	27.5987	26.9612	26.7466	27.9124	27.4035	28.3293	29.0158	29.7662	29.1101	28.9501	28.7473	28.8803	29.0421	29.1031	29.0588	29.2351	29.8712	29.7265
MA-00210-308	62.4277	30.0661	29.8738	29.3209	29.9811	29.5769	29.7416	28.4584	28.4559	28.9062	28.4358	28.8808	28.312	27.8474	28.3123	28.4044	27.7954	27.3163	28.0254
MA-00323-15	62.3593	31.6377	31.7827	31.6983	31.4575	31.4009	31.5946	30.646	30.6022	30.8233	30.2103	30.5185	30.252	30.5547	30.1724	30.4596	29.3056	29.9544	30.15
MA-00320-159	62.3436	31.8417	31.8858	31.6177	32.0246	31.2782	31.8457	30.6594	30.9638	30.8102	30.2422	30.2523	30.3632	30.6727	30.2719	30.2941	30.2154	30.0537	30.4727
MA-00182-86	62.3035	29.5663	27.4303	29.4235	29.6517	28.8067	30.3376	30.0449	30.3057	30.3141	30.2738	30.3686	30.1311	30.764	29.995	30.3298	31.5459	31.3882	31.9676
MA-00153-579	62.2769	25.0801	25.7722	24.8863	25.9507	25.2197	25.5515	24.7074	23.8198	25.6264	25.5134	27.1432	26.629	26.6816	26.9126	27.067	25.8868	26.6006	26.421
MA-00270-66	62.1547	25.4222	26.2958	25.1154	25.4521	25.7258	25.6359	23.6082	24.5121	24.6965	23.7467	23.4399	24.0658	24.109	24.7029	23.9023	23.9776	23.936	24.575
MA-00320-43	62.1132	27.6568	27.7029	25.9656	27.8946	27.8896	28.3465	27.129	27.9312	28.7114	28.7228	29.0868	28.4387	29.0168	29.0039	29.7239	28.4328	29.1093	29.2602
MA-00173-56	61.9844	23.1638	22.9128	21.9902	22.4396	23.0021	23.1556	20.4173	21.5795	22.8901	21.7529	21.5024	22.1203	21.9753	20.9737	22.9215	21.231	21.6414	19.78
MA-00073-478	61.8954	24.5812	24.2921	24.0003	23.9199	24.8121	24.8208	25.3947	25.5463	26.1842	25.8042	26.671	25.642	25.3952	24.7964	25.4076	24.4515	25.3428	23.9633
MA-00073-159	61.817	30.7253	31.0062	30.4732	31.5405	31.2605	31.704	31.8191	32.2123	32.201	32.4467	32.571	32.5481	32.6716	32.3653	32.5222	32.1458	32.5111	32.692
MA-00297-210	61.6827	26.1389	25.8623	25.7537	25.4767	25.7382	26.7443	26.155	26.6106	24.7063	24.2799	23.9099	25.5261	24.8325	24.5051	25.4248	23.3449	24.0462	24.6566
MA-00206-71	61.6148	27.1661	27.0169	26.8422	28.0805	28.4236	28.7785	27.291	28.2756	28.0158	27.9325	27.1247	28.616	27.8511	28.2817	28.0658	25.7228	26.9062	26.3333
MA-00120-323	61.5821	33.8883	34.0266	33.6415	35.6006	35.1491	35.2514	35.3033	35.6735	35.4396	35.5527	35.715	35.7553	35.8746	35.7873	35.6787	35.5383	35.7328	35.8792
MA-00072-36	61.5588	29.9022	30.2375	29.7768	30.9165	30.0901	30.5961	29.4429	29.6738	29.1388	28.3848	28.6398	28.6426	28.5812	28.8962	28.7154	28.7358	28.668	29.1047
MA-00101-587	61.4317	31.6606	31.8972	31.6005	32.0185	31.5177	31.9505	30.5406	31.0927	30.6103	30.2959	30.5631	30.5716	30.3245	30.3874	30.2759	29.7215	29.7638	30.6282
MA-00326-184	61.2819	28.3011	28.4341	28.0865	28.608	28.0125	28.367	28.7478	29.139	29.0712	29.4299	29.8139	29.6804	29.9393	30.1089	29.8051	29.4211	29.7472	29.9944
MA-00073-288	61.2547	24.5058	25.1618	24.0078	24.7226	20.395	21.3988	24.2909	24.3207	20.8776	25.3084	25.6464	25.2932	22.9364	26.0128	25.0263	24.6158	26.0364	26.0045
MA-00101-334	61.241	26.1485	26.1572	26.169	26.6516	25.0779	25.4913	24.2877	23.4785	24.338	23.9004	24.6556	26.7934	25.2479	24.7661	25.1604	24.7292	24.1541	25.182
MA-00090-443	61.2044	29.4473	29.8431	29.4705	30.2579	29.8263	29.8649	28.6214	29.115	29.0812	28.6005	28.9625	28.4916	28.68	27.9681	28.1442	28.1234	28.2743	28.6119
MA-00101-382	61.1459	22.7888	23.2231	22.2903	20.8314	22.6347	23.3063	21.6974	21.4185	22.882	23.0733	22.7035	23.1601	23.2138	23.633	23.0904	22.1264	21.309	20.1106
MA-00173-40	60.7291	23.1129	24.3703	23.4008	21.6583	25.6186	26.429	26.3312	26.1988	25.41	25.2406	26.0355	25.5442	25.3788	25.5822	24.6623	25.0362	25.738	25.7941
MA-00073-318	60.6084	25.5855	25.3904	24.914	25.0405	21.4259	23.6171	23.3913	23.0293	23.7945	22.2355	25.8035	24.7609	23.0334	24.022	23.4295	22.2056	26.9736	22.9706
MA-00297-95	60.5164	28.1105	28.0964	28.4161	28.6643	29.5107	29.5579	29.3767	29.525	29.5681	29.7134	29.7258	29.7695	30.1595	30.0007	29.9952	30.2132	30.0882	30.4248
MA-00112-271	60.5047	30.0793	26.3251	25.7118	25.434	26.2645	24.4941	23.1713	24.2936	24.7988	24.6364	23.5788	23.9191	24.4983	24.4807	23.6715	23.9217	24.6351	24.0874
MA-00153-22	60.4127	27.0115	26.5464	27.1324	26.6573	27.0446	27.4273	26.6084	27.2234	26.3026	24.151	25.9361	26.2418	25.3727	25.6612	25.9856	25.3635	22.3205	25.9515
MA-00189-476	60.4052	26.804	26.8421	26.7812	27.6105	26.9884	27.3721	27.8344	29.1139	28.1122	28.7854	28.7516	28.3418	28.9874	29.1761	28.4372	28.984	28.9048	27.6903
MA-00162-199	60.3834	21.7627	23.5216	20.8261	23.9306	23.1071	24.741	22.5118	22.0538	23.3947	22.1925	20.8413	22.7613	21.7626	23.3941	21.6798	22.6644	24.004	22.8759
MA-00182-2	60.049	24.2452	24.9283	22.9553	23.337	22.1162	22.3858	21.8389	21.5082	21.625	22.6825	22.6558	22.3268	24.6216	22.3944	23.5399	23.579	22.0599	21.9487
MA-00270-67	59.9345	27.4539	27.7443	26.5347	28.1102	27.0314	27.8923	25.8809	27.0031	26.5325	26.1157	26.1695	26.2667	26.3371	26.7466	25.8077	25.1984	25.4412	25.6377
MA-00073-434	59.7064	31.9882	32.0316	31.8707	33.2038	32.9269	33.2619	32.8295	33.3698	33.2135	33.7252	33.7047	33.7553	33.7946	33.7252	33.7553	33.5412	33.8042	34.0184
MA-00090-452	59.6535	30.0854	30.7211	30.4811	31.026	30.1486	30.5976	29.4414	30.1981	30.0832	29.7802	29.4699	29.5469	29.4301	29.3463	29.849	28.6079	28.758	28.5347
MA-00320-4	59.5926	25.922	25.1923	25.3565	27.0997	26.9727	27.5533	25.5153	26.4699	25.9725	26.6486	26.0394	26.3079	25.6195	26.4829	26.0273	25.0275	24.899	25.7843
MA-00268-48	59.4888	28.5201	28.7808	28.1691	28.8784	28.8404	29.1524	29.1711	29.5746	29.606	29.6334	29.7168	29.7476	29.8984	29.891	29.8376	30.3909	30.5728	30.7165
MA-00090-13	59.4224	27.346	26.8963	26.7886	28.402	27.4545	27.6761	28.1299	28.3678	27.8006	28.5612	28.7933	28.6687	29.1585	28.7651	28.8966	28.7916	29.101	28.7142
MA-00182-205	59.4113	27.966	28.3291	27.8589	29.5479	29.2061	29.1732	29.3077	29.994	29.1604	29.5545	29.8991	29.9614	30.1366	29.8693	29.7952	29.5633	30.0737	29.8481
MA-00334-252	59.297	26.9553	27.2369	26.523	28.7296	27.7017	28.2223	27.7801	28.8481	28.4541	28.6278	28.3169	28.7186	28.2932	29.1715	28.3866	28.8934	29.5487	29.0038
MA-00153-474	59.1841	27.3557	27.4286	26.5492	28.0432	27.0951	27.9352	28.5127	28.6163	28.7596	29.0983	29.0754	28.9557	28.8318	28.593	28.8435	28.8608	28.3918	28.9231
MA-00073-279	59.1449	25.9885	25.594	26.1415	26.1073	26.4181	27.0623	25.5547	24.9303	25.3648	25.8248	24.8995	25.3749	25.3378	26.46	25.4548	22.6426	23.8313	25.6053
MA-00297-233	59.1087	28.4972	28.2177	27.7528	28.1199	28.0498	28.5023	28.0812	27.664	27.6981	27.3326	27.3151	26.8221	26.6937	26.4553	26.8032	26.4098	26.9499	26.951
MA-00189-221	59.068	27.5225	27.1543	25.3465	27.0507	26.5298	26.8721	25.6996	26.3074	25.8909	26.1332	26.1941	28.7839	28.9046	29.5073	26.2935	26.2172	26.2718	27.0697
MA-00184-370	58.9389	25.0341	24.6079	24.3117	24.0786	24.2879	24.5183	22.2352	23.7816	24.4228	22.6307	24.0904	22.5909	23.6505	23.2464	23.6224	23.237	21.8487	23.2582
MA-00067-167	58.7132	23.7502	25.4439	23.4709	24.3243	20.9436	23.4794	24.1988	19.9577	24.1075	24.7038	24.9164	25.154	24.8594	23.745	24.9083	25.6848	25.6127	25.1353
MA-00326-26	58.5934	33.7849	33.9591	33.3698	35.0911	34.8281	35.0266	35.515	35.8042	35.6442	35.6225	35.4303	35.715	35.3502	35.3067	35.2584	34.3169	34.8654	34.87
MA-00090-481	58.5734	27.7853	27.8282	26.754	27.8243	28.3202	28.9582	27.6049	27.6137	27.6083	26.5019	27.5171	27.6229	27.0396	26.007	26.46	26.1134	26.8034	26.8151
MA-00173-84	58.2438	25.0357	24.1423	21.8657	25.4254	24.4647	25.5308	23.125	25.385	25.1244	23.1995	23.351	24.0189	24.1697	24.5052	23.9513	22.8832	23.2852	23.7044
MA-00268-159	58.1926	26.2103	26.9497	26.0906	27.2898	26.1984	27.2141	27.7807	26.3485	27.62	27.3787	27.5219	27.702	27.7859	28.0367	28.157	28.3572	28.3628	28.6915
MA-00090-429	58.1557	27.5519	28.1313	27.5145	27.6819	27.8627	27.3697	26.5072	27.2896	26.2839	25.4644	26.1233	26.3145	26.5434	26.7162	26.426	26.4646	27.1358	25.7214
MA-00090-219	58.1461	29.2749	29.1347	29.1356	30.8208	30.0683	30.8471	30.6563	30.8782	30.9193	31.0767	30.9362	30.8675	31.0283	31.0141	30.8289	30.3422	30.0908	30.648
MA-00268-117	58.1302	23.4967	24.459	22.3379	24.668	24.1774	24.312	24.3318	22.6026	24.9936	25.3442	25.8782	25.4313	25.0525	25.1115	26.4966	24.25	24.3824	24.4564
MA-00153-205	58.0307	31.1803	31.6595	31.3492	31.4457	30.8686	31.2936	30.0223	30.4907	30.3598	29.86	29.8845	30.0135	30.1482	29.941	30.0328	29.7442	29.6615	30.0956
MA-00055-297	57.9748	25.2034	26.4925	26.409	26.8	26.2729	27.005	24.2402	25.3561	25.3525	26.0714	26.1639	25.2116	25.1844	25.3263	26.1233	24.7359	24.3266	25.2089
MA-00297-382	57.9743	28.0738	28.727	27.8717	28.254	28.3864	28.5289	25.2994	26.7391	26.8605	26.8455	27.1599	27.5602	27.5746	27.1363	27.0271	27.9755	27.5304	27.1193
MA-00153-458	57.8919	26.6063	27.0337	26.3245	25.3439	25.4041	25.8009	24.0947	25.2973	24.4803	24.7027	25.6554	24.2895	25.729	25.4921	25.2402	23.843	24.1481	25.6143
MA-00112-263	57.887	29.0945	29.5375	28.6769	29.5109	28.8582	29.1111	28.1422	27.9399	28.0653	27.9118	27.4771	27.464	27.3437	27.5963	28.0544	27.5019	28.0261	27.6207
MA-00184-150	57.8826	22.3336	22.3613	23.4957	24.3822	24.4061	24.652	23.6707	24.3865	24.4077	24.5203	24.207	24.4752	24.4548	23.5158	21.4378	23.1157	23.8858	24.1583
MA-00210-65	57.8473	28.1579	27.6837	27.7098	28.0005	28.2354	28.0951	28.496	28.8555	28.6008	29.2795	29.1323	29.0621	29.2529	29.2362	29.3266	27.3391	27.6529	27.9376
MA-00320-193	57.8385	26.3689	27.1637	25.7748	26.1421	26.2369	26.0697	27.0797	27.4188	27.7213	27.5759	28.0124	27.7744	28.2811	27.5382	27.6031	26.7172	26.5069	27.3477
MA-00213-148	57.8116	25.9669	25.5569	25.86	26.5148	26.3962	26.7873	27.5654	27.3079	26.9647	27.1252	27.2109	26.1998	27.5137	27.2538	26.7155	27.8978	27.3817	28.2773
MA-00190-77	57.7613	25.5453	23.9731	25.0598	23.385	23.8289	25.8825	26.7866	24.8079	26.2306	26.9994	26.0398	26.3542	26.5828	26.6971	26.6569	25.92	25.5985	25.3398
MA-00139-366	57.7371	27.1618	23.8655	24.0162	25.7985	25.4097	21.8085	20.6851	22.7462	27.0293	22.4017	22.4004	22.8811	23.6455	23.532	23.0166	23.9969	23.9441	24.1224
MA-00213-320	57.6312	25.453	25.8381	25.1526	26.6996	26.313	26.7112	26.4324	26.0091	26.8034	26.8579	26.6069	27.1617	25.2676	24.3926	25.2047	25.6987	26.2501	26.1438
MA-00297-491	57.6259	26.4887	26.1737	25.9678	27.2058	25.7933	26.4996	23.9828	24.4574	24.1192	25.1219	24.637	25.1532	25.1171	25.0477	24.6105	26.4311	24.9876	25.6173
MA-00173-158	57.5689	28.288	28.0632	27.7135	26.8648	26.8663	27.8163	27.2474	26.7125	25.6475	26.1367	26.4577	25.9006	27.1907	27.4449	25.2495	26.5612	25.6884	26.2749
MA-00297-476	57.5364	24.4376	23.5608	23.6398	24.6613	23.0043	23.5561	22.8503	22.9434	23.4034	24.3803	23.2527	23.4371	23.8832	23.9435	22.9611	25.109	24.9641	25.6498
MA-00055-207	57.4819	24.054	24.9919	24.4643	22.8879	22.9406	25.0616	22.8305	22.2836	21.4443	22.9843	23.2318	22.8252	22.0207	23.7217	22.9054	23.2687	22.6585	23.2748
MA-00073-373	57.4572	22.5784	23.0222	24.0915	23.4086	23.4268	23.8065	24.6693	25.4419	24.9329	25.0766	25.2259	24.4458	24.6946	23.957	25.3591	25.1623	24.137	25.7204
MA-00101-66	57.4417	26.2218	25.7757	26.4525	28.1215	26.9519	26.0282	26.5272	28.6195	27.9344	26.1803	27.6503	25.3297	27.7231	27.4767	27.221	27.8342	27.7317	28.812
MA-00120-36	57.3582	30.4984	30.5828	29.5416	31.7298	30.6096	31.2324	31.3106	31.6038	31.362	32.0658	32.3049	32.2109	32.0608	32.2969	32.3312	32.5857	32.7666	32.8684
MA-00213-292	57.2847	29.4427	29.3539	28.8785	28.858	28.9586	29.0661	28.2084	28.5335	28.2092	27.8339	27.6382	28.0178	27.7393	27.5833	27.7605	26.2737	26.7489	27.5627
MA-00072-18	57.2676	29.9296	30.4345	29.7714	30.2768	29.7221	30.1933	28.9132	29.7918	29.4264	28.9621	29.2935	28.9595	28.8657	28.7004	28.6908	28.1056	27.8993	28.7612
MA-00111-84	57.179	28.5525	28.2554	28.3664	28.5981	28.595	29.1445	27.3336	26.6534	27.1267	26.9558	27.8708	28.3142	28.0684	28.184	27.713	27.4288	26.7074	26.227
MA-00297-347	57.1507	30.1005	30.374	29.8241	30.5178	30.2303	30.5629	29.8971	29.995	30.0418	29.0463	29.2936	29.8449	29.7335	29.3775	29.097	28.3261	27.686	28.7561
MA-00139-299	56.6757	28.9484	29.2286	29.279	29.6023	29.4664	29.9628	28.6687	29.3419	29.1082	28.2839	28.8983	28.7346	28.0341	28.2714	27.7574	27.2824	27.855	28.6885
MA-00213-134	56.6729	24.0977	25.6974	25.0805	23.6733	24.0191	24.0117	22.9185	23.0471	22.8835	22.681	22.9041	22.4765	22.7771	23.1477	22.6863	22.4657	22.5955	23.2076
MA-00028-35	56.667	29.0674	26.2392	25.6797	27.0058	21.2955	28.6267	21.6182	24.6842	24.615	26.5572	24.2217	24.2269	25.4664	24.9225	24.7532	26.5368	22.114	25.7752
MA-00213-553	56.6551	25.9094	27.1383	26.8007	25.6134	26.7873	26.5017	28.0502	28.3371	28.3877	28.2677	27.8681	28.3033	28.5241	28.5697	28.6644	27.8781	27.9957	27.8372
MA-00153-563	56.6204	29.2608	29.5296	28.8566	29.3336	28.9816	29.5632	27.3548	28.2065	27.9941	28.1416	27.7577	28.2423	28.327	28.3741	27.9357	28.0747	26.7542	28.1374
MA-00320-50	56.5762	22.887	24.4061	23.099	26.008	26.2981	25.1582	23.1486	25.4948	25.4538	26.5911	25.2504	26.276	25.7616	25.8831	24.926	26.7376	25.2828	25.7981
MA-00101-595	56.5155	26.9	27.1825	26.7108	27.8464	25.2947	27.0076	24.9815	25.5388	25.3723	25.3062	25.48	25.603	25.294	25.2374	25.2196	25.0586	25.0589	25.4568
MA-00090-154	56.4041	28.5323	28.432	28.07	28.7862	28.4873	28.7433	26.1327	26.5825	26.7369	26.6096	27.4792	26.771	28.3624	29.1537	26.9465	28.6238	27.3247	28.4493
MA-00268-99	56.3004	27.2856	27.0237	27.2385	27.5533	26.4602	27.3555	25.6837	25.6902	26.5129	27.037	25.9389	26.8479	26.1791	25.6681	25.8515	25.8966	24.7269	26.0226
MA-00067-225	56.0245	25.7169	25.7536	24.1543	24.9778	26.1186	24.7694	24.332	24.329	24.9262	24.3427	24.1582	24.9479	24.4114	24.8661	23.5889	23.7862	23.2462	22.0638
MA-00270-56	55.8389	28.2343	28.5376	28.3313	28.7606	28.7359	28.345	28.1244	27.5927	27.9916	28.0562	26.6641	28.7116	27.563	27.4158	27.3877	26.0092	26.8185	26.6367
MA-00067-346	55.8025	27.3839	27.4511	26.2352	28.8031	27.7706	27.8176	29.2524	29.4043	28.9232	29.0405	28.6478	28.9762	29.1747	28.8671	28.769	29.253	29.6066	29.4838
MA-00101-121	55.7912	24.384	24.3949	23.7341	24.5834	24.1837	25.3299	24.435	24.6805	24.0256	24.5651	24.5988	25.1388	23.376	24.1948	24.3452	21.9406	21.7803	23.9245
MA-00184-34	55.7627	28.3556	29.0373	28.0307	28.2315	28.3824	28.7676	27.6631	27.8587	27.6334	27.1755	26.0367	27.7982	26.7577	27.8445	27.2975	26.4722	27.0834	26.9158
MA-00055-199	55.6753	25.1748	25.2483	24.9301	24.6968	25.0355	24.3363	23.3388	24.1011	24.0904	23.7495	23.4015	23.6561	23.2932	23.3192	23.2727	23.5685	23.2388	23.5558
MA-00120-398	55.6746	27.1185	26.7136	25.8189	25.774	26.3435	26.6611	26.09	25.7286	25.1793	24.9221	25.1814	24.9966	25.6835	25.4673	24.9221	24.5655	24.6415	25.0995
MA-00055-341	55.5131	27.3422	27.5278	26.5243	25.283	26.0938	26.2312	25.9351	25.557	25.2726	24.8461	24.6478	24.9761	24.9504	25.4266	25.3505	24.7538	24.4651	24.9782
MA-00210-45	55.488	25.5326	25.7146	25.2504	23.9832	23.8796	23.3932	23.6498	24.3522	22.8642	25.3996	23.0241	24.2544	24.7575	22.7528	24.4416	24.4908	24.5081	24.6408
MA-00112-63	55.1548	24.9456	24.5296	24.4682	25.2433	24.4873	22.6554	22.9526	23.9462	24.5617	24.1691	23.1473	23.3896	22.8951	23.5132	23.5452	24.7475	25.2184	25.3805
MA-00112-65	55.1377	30.0384	30.3677	29.8655	29.9946	29.6943	29.8974	28.79	29.1268	28.8421	28.4382	28.5733	28.4476	28.8987	28.5131	28.7191	28.314	28.962	29.0971
MA-00101-683	55.1255	28.7088	28.7072	28.0616	27.9527	27.7593	28.5064	26.9131	27.8775	27.0817	26.5354	27.1344	27.4113	27.1216	27.013	26.6847	26.972	26.4937	27.2422
MA-00184-320	55.1014	24.6736	24.5576	24.8465	24.3396	24.495	23.4235	23.4735	23.2613	23.3859	23.2728	23.267	23.7577	23.2527	25.8579	23.6516	25.356	24.7978	25.055
MA-00213-419	55.0761	23.5531	24.1563	23.4584	24.196	24.2977	24.4675	24.4094	25.1213	25.3549	25.3511	25.1702	25.7314	25.4523	25.5007	25.9092	25.402	25.5157	25.3224
MA-00182-14	54.7975	24.8412	25.3741	24.9881	25.3219	25.2797	25.0175	24.2234	24.7764	24.4274	25.1826	25.5138	26.086	26.2323	26.1551	26.3173	26.3774	26.3878	26.7757
MA-00162-83	54.679	25.1667	24.8098	23.3006	25.7298	24.8707	25.1586	24.8948	24.6059	24.7587	24.1001	22.6586	24.2836	24.1834	23.3357	23.2243	24.5406	25.9008	21.8933
MA-00067-110	54.6481	29.2474	28.953	28.0827	29.7403	28.6793	28.3917	25.0567	28.0592	25.6394	25.2159	25.4044	26.1341	27.1615	27.8953	26.8552	25.553	26.6053	26.3535
MA-00334-54	54.4652	29.2427	29.6596	28.8549	28.7454	29.0124	29.3279	28.3531	28.4778	28.8607	28.6622	28.9653	28.5882	28.8248	28.0615	28.4219	27.2724	27.1008	27.0351
MA-00297-252	54.4391	26.5663	26.4738	26.0565	26.6549	26.1375	27.1648	26.2006	26.7099	25.6559	25.5093	24.695	25.2256	26.7497	25.5892	25.9587	25.0805	24.8637	24.9744
MA-00162-56	54.3872	27.7374	27.9203	27.9992	28.1911	27.6531	29.0518	28.2238	29.2909	29.3175	29.917	29.5506	29.642	29.9439	29.2803	29.6248	29.4007	29.0172	29.146
MA-00153-422	54.1425	29.2918	29.5285	28.668	29.1406	28.5781	28.8935	28.0863	28.4777	28.1562	27.8001	27.8513	27.8731	28.3939	28.1446	27.8606	27.8126	27.4657	26.4282
MA-00162-9	54.0489	25.9752	25.4332	25.7235	26.6312	25.779	24.6538	26.8192	26.8763	25.5312	27.8922	26.0696	26.3172	27.2329	27.9339	27.8796	27.4062	25.6468	25.9199
MA-00190-78	54.0117	32.4716	31.8795	32.091	34.1975	33.2015	34.1068	32.8382	33.1279	32.9109	32.8825	32.7033	32.325	32.8884	32.5048	32.692	32.1724	31.5343	32.2119
MA-00120-1	53.9769	25.1741	24.4584	24.1242	24.5944	24.306	22.7814	20.5349	21.4142	22.1774	22.4129	22.3721	23.2758	22.9559	22.8101	22.4405	22.8709	22.5699	23.7701
MA-00073-323	53.8805	25.7426	26.3846	26.4484	26.3047	26.5888	24.6095	25.7305	26.1308	25.9093	25.3022	25.0901	25.49	23.4359	25.4394	23.9558	23.3566	24.4266	25.1356
MA-00323-196	53.8196	23.6499	24.4782	23.4117	24.2164	23.9659	23.8096	24.7914	24.9733	24.3801	25.0142	25.0406	25.3512	26.745	25.6733	26.6057	25.125	25.9004	27.0912
MA-00134-3	53.7681	26.7866	27.4496	26.7285	26.4506	26.9752	26.9679	25.183	25.8199	25.0818	24.7505	26.4598	24.2133	26.4532	26.7007	24.6883	23.2186	25.8556	26.2948
MA-00154-2	53.7555	27.7069	28.4349	27.8945	27.7201	26.7563	28.0542	26.3994	26.78	26.9463	26.383	26.6768	26.4398	26.6997	26.3433	26.5311	26.2262	26.2922	26.9395
MA-00334-136	53.7126	25.5447	26.8977	26.095	26.0903	24.5104	25.0844	24.3064	24.315	23.9099	24.3108	24.7862	24.5219	25.3444	24.6225	24.78	24.2333	25.6831	25.1271
MA-00184-380	53.6537	34.0266	34.0017	33.7252	34.7504	34.2336	34.6522	34.2689	34.5296	34.4334	33.9591	33.9153	34.0673	34.0753	33.9933	33.9677	32.4503	32.4432	32.8764
MA-00162-359	53.518	26.0319	26.9614	25.8998	27.4672	26.4348	26.889	26.4597	27.3514	26.6123	26.1849	25.3011	25.6526	24.3815	26.6954	25.0617	25.9625	24.1811	26.1744
MA-00184-205	53.3915	25.39	25.7737	25.521	26.4176	25.7445	25.6836	25.8216	27.138	25.5345	27.129	26.4993	26.7657	26.6769	27.1572	26.4793	25.898	24.4659	24.3227
MA-00153-106	53.331	22.856	23.2161	22.2439	24.6559	23.4675	24.2453	21.9121	22.584	22.712	23.8076	21.7131	22.8642	22.5973	24.4956	23.1396	22.5601	22.6511	21.4479
MA-00055-290	53.2971	22.8186	23.571	22.5633	23.2352	23.6227	23.549	23.8762	24.9794	24.3027	24.2607	24.6836	24.6125	24.7276	24.6234	24.8935	24.0479	24.9271	24.3856
MA-00101-457	53.2192	24.3645	25.9153	24.5593	26.2271	24.2457	25.7712	25.8662	25.1391	25.6969	23.9479	24.0476	24.0247	25.9485	26.3626	25.5557	23.5112	25.5117	25.4241
MA-00153-510	53.1724	25.7304	25.4485	25.4286	25.8217	25.9352	26.1852	25.1649	25.3856	25.0476	25.2892	24.9303	25.1538	24.7551	24.4633	24.4447	23.8816	24.3337	23.6175
MA-00210-87	53.1502	27.9932	28.2552	27.6907	28.1422	27.2139	27.9512	27.1987	27.681	27.8191	27.4776	27.0155	27.5085	27.6796	27.4758	27.3271	25.4085	26.0037	26.0676
MA-00111-70	52.9495	27.6824	28.154	27.908	27.095	27.7132	27.4807	27.2319	27.0421	27.3289	26.5734	26.4056	26.6433	27.6344	26.8829	26.4032	25.4699	26.3848	26.13
MA-00210-88	52.912	27.5313	27.6705	27.5786	28.0388	27.1202	28.2449	27.3086	27.4365	27.7131	27.2386	27.5916	27.7936	27.607	26.4297	26.7036	25.5618	23.9452	26.3798
MA-00189-329	52.8289	26.5881	27.7934	26.7251	26.9448	27.9231	26.6543	25.786	26.4813	25.5395	25.1564	25.7288	25.2095	25.8683	25.6366	24.8807	25.11	25.6687	25.9245
MA-00189-14	52.7251	23.5274	23.693	22.3187	23.6076	23.2611	23.6599	22.1745	22.5179	22.8367	23.4109	23.2707	22.9197	23.2459	23.3999	23.1418	21.8369	21.4315	21.6023
MA-00055-150	52.6048	28.3486	28.3901	27.5322	28.9837	28.9204	29.6206	28.8207	28.9337	28.7242	29.747	29.8569	29.9084	30.2648	29.9093	28.9234	29.5498	29.3728	29.8191
MA-00213-355	52.5851	28.7976	28.5589	28.648	29.5587	28.8863	29.3443	27.6067	27.6141	28.2833	27.0759	27.5183	27.8965	27.1593	26.4535	28.0091	26.1941	26.7266	27.3837
MA-00213-571	52.5848	25.4045	25.1234	24.2597	24.2386	24.3126	24.9737	23.759	23.951	23.5045	23.5352	22.5559	22.6123	23.9791	23.6977	24.006	23.6864	23.1555	24.3391
MA-00139-245	52.5352	32.0952	32.1965	31.6571	32.0705	31.7523	32.2374	30.6545	31.1851	31.3795	30.8888	30.6798	30.8682	30.9988	30.6633	30.9075	30.2476	30.0765	30.6866
MA-00323-32	52.2278	26.4129	26.6584	26.1734	26.6531	26.5849	26.6371	26.5956	27.3739	26.9989	26.8644	26.5832	27.3197	27.302	26.6745	26.7446	24.9932	25.0479	25.4843
MA-00067-303	51.976	30.6693	30.8699	30.3277	30.84	30.7453	30.8999	29.6665	29.8916	29.7497	29.5662	29.4602	29.4207	29.7071	29.6022	29.2539	28.9034	29.579	29.5138
MA-00182-282	51.9447	26.6403	26.8571	26.4249	27.3782	27.0091	27.6842	26.3147	26.9493	27.0536	25.7479	26.0546	26.4201	26.8215	26.5219	25.9175	22.492	25.1729	23.6964
MA-00268-82	51.9368	25.0453	22.2163	22.9466	22.2791	22.6114	23.456	23.8241	24.7737	23.8199	22.0173	23.6677	21.8982	23.7818	25.1612	23.0027	24.2532	22.0311	24.662
MA-00184-62	51.8081	24.2896	24.225	23.276	24.1809	21.9864	22.6433	21.5276	24.6495	24.0377	24.6919	23.9424	24.1148	24.7533	24.3259	24.8712	24.0585	24.4539	24.0984
MA-00184-481	51.7886	26.2012	26.7286	26.0604	26.2581	26.7407	26.0122	25.6574	25.0643	25.9053	26.6724	26.9048	26.8737	27.3514	27.5121	27.1508	26.9567	26.9801	27.4691
MA-00139-106	51.7585	27.6132	26.5876	26.2089	26.2533	27.9633	26.0667	27.6497	27.42	28.3321	27.5211	26.687	27.4753	27.1277	27.0712	27.4885	28.7687	28.8045	28.9094
MA-00297-282	51.7365	24.7424	24.6458	24.1065	26.2116	25.6739	25.7278	23.5962	25.9247	26.125	25.5155	26.1262	25.5823	25.0643	26.1507	25.5009	23.261	24.7712	24.8478
MA-00210-178	51.6949	27.8178	27.7035	28.0942	28.076	27.8329	28.8339	27.9518	28.2337	28.2947	27.4512	27.3537	27.5033	27.8813	26.3298	27.6218	24.4601	26.7141	27.1391
MA-00162-253	51.3991	25.592	25.4807	25.1765	25.6076	25.2526	25.9939	25.477	25.6982	25.4988	24.0935	25.3796	24.9863	24.8704	24.3958	23.9522	23.1707	23.9751	24.8712
MA-00153-674	51.0685	29.9799	30.4305	29.6794	29.8143	29.7812	30.0904	29.005	29.019	29.051	28.3919	28.5049	28.7162	28.5755	27.9666	28.8577	27.8509	28.0563	28.7773
MA-00153-571	51.0065	29.0078	29.8309	28.6073	29.7668	29.696	30.0614	30.2308	30.4336	30.3458	30.4218	30.5154	30.3976	30.7464	30.5109	30.3423	31.3996	31.3182	31.6983
MA-00073-444	50.9439	30.4689	29.6916	28.5415	30.2115	29.8354	30.8234	29.8344	29.531	29.9239	30.5185	30.0794	30.3567	30.2519	30.5129	30.0405	28.7025	28.1416	28.7646
MA-00323-195	50.8833	29.3988	29.529	29.0904	29.3895	28.9432	29.333	27.5106	28.5652	28.3238	27.5188	28.388	27.7512	28.0172	28.1672	27.6643	27.9221	27.6757	28.2951
MA-00210-290	50.8745	28.4884	29.1388	28.3122	28.0958	28.0293	28.4235	26.3954	26.3255	27.0974	26.9189	26.6566	27.085	28.614	28.5189	26.9797	27.4912	27.6685	27.9151
MA-00326-154	50.8618	24.4558	25.7484	25.4068	25.0097	26.5889	26.2696	26.4993	25.681	26.7279	26.6729	26.3838	26.4427	27.334	27.3724	27.3908	25.7955	25.7526	25.8714
MA-00090-315	50.8423	26.2112	25.9375	24.6985	27.3744	27.0542	25.9009	26.1188	27.3976	27.2323	27.0014	27.493	27.222	27.2235	26.8102	27.2163	25.9412	25.0067	25.7644
MA-00182-22	50.7263	24.9083	23.4832	23.1902	23.5797	25.6417	25.4492	25.9225	25.8326	25.6447	25.3517	24.846	24.1723	25.3043	25.9554	25.0345	24.5517	25.5571	23.4192
MA-00111-32	50.7131	24.7711	25.4836	23.8994	22.32	23.0709	22.7716	25.5297	24.7759	24.4241	25.2868	24.2624	23.689	24.0879	24.6101	24.0364	24.6005	24.6008	24.3958
MA-00112-58	50.5883	25.4343	25.6645	26.4571	26.7671	26.2383	27.4311	27.5641	27.6583	27.3258	27.5281	27.7127	27.9657	28.3712	28.169	27.0665	27.7172	27.7124	28.1732
MA-00073-289	50.5521	25.154	25.5558	24.8904	25.2708	24.8075	24.8887	26.4102	26.0895	26.3532	25.9823	24.3622	26.2251	25.7861	25.1197	24.6027	23.5014	23.5822	25.0472
MA-00182-213	50.3214	27.5161	27.3926	27.2047	27.725	27.3476	27.5907	25.9046	26.2934	26.8	26.4154	26.0012	25.9404	26.7608	26.0566	25.9494	25.9004	25.7224	27.3247
MA-00210-314	50.0946	27.5571	26.6396	26.7557	27.9898	26.8618	27.4182	25.3002	25.8769	25.3499	25.7083	25.3795	26.0838	25.9441	25.1171	26.1846	25.0087	25.2639	25.2257
MA-00090-29	50.0403	29.2359	29.2587	28.8999	29.8937	29.3067	30.2012	30.2628	30.8989	30.3137	30.7017	31.0232	30.6676	30.7613	30.7311	30.6158	29.7798	29.3599	30.0771
MA-00210-185	50.0276	25.3377	24.5172	23.6908	29.971	24.1913	25.8262	23.9662	28.7864	22.678	22.6616	23.6759	25.8685	24.521	24.294	23.1858	24.4028	24.3455	25.2017
MA-00120-272	50.023	27.9155	28.4219	28.2314	28.7334	28.3773	28.9089	28.3466	28.5088	28.2994	28.0998	27.4679	27.969	28.5101	28.1465	27.0142	26.8103	25.2404	26.6611
MA-00326-106	49.9728	28.231	28.9439	28.4977	28.5107	28.916	29.2369	27.7748	27.9234	27.5899	27.5275	27.6982	28.263	27.8839	28.5202	27.6395	26.7641	26.3805	25.6996
MA-00120-397	49.9355	25.3706	25.9807	24.2703	24.4992	25.1435	25.5777	24.1887	22.0032	24.7438	25.0135	24.7964	26.1382	26.0208	25.1921	26.3918	24.0995	24.7564	25.8229
MA-00101-207	49.8814	26.2755	27.4818	26.6396	25.2915	25.4451	27.1663	26.4733	23.3863	25.7168	26.2648	25.7024	25.238	24.1588	26.9841	24.552	24.6391	26.1275	23.7603
MA-00184-454	49.8805	23.3546	25.363	23.91	24.2616	25.4314	25.5042	26.2825	23.4978	25.4389	25.9424	24.5945	25.1227	29.5214	25.4285	29.6453	24.9036	24.7286	24.0037
MA-00210-265	49.8348	28.3597	28.2704	28.4844	29.3118	27.9738	28.8772	27.0537	27.9271	28.2748	27.3815	27.9521	27.221	27.4475	28.0727	27.7766	27.3929	24.7244	27.7991
MA-00112-72	49.8026	27.7125	28.1586	27.869	28.9926	28.7775	28.9085	29.0992	29.7477	29.7231	29.7834	29.635	29.5723	29.6469	29.205	29.5675	28.8706	29.3639	28.8749
MA-00153-417	49.7741	26.4266	27.0277	27.451	27.9484	27.576	27.6571	26.7648	26.9722	26.3794	24.781	26.0071	26.2709	26.8337	26.8332	26.047	26.3983	25.7247	26.5778
MA-00139-278	49.702	26.5853	26.9941	24.4373	24.6703	25.4528	27.169	26.8868	25.9701	26.1302	25.902	25.3075	25.5525	26.6154	27.2	27.4815	27.3398	26.417	27.0889
MA-00297-131	49.6979	30.7292	30.8903	30.5502	31.2723	31.1827	31.5255	31.8841	32.1706	32.0596	32.0948	31.9808	32.1902	32.2888	31.9947	32.1424	32.66	32.2953	32.9887
MA-00182-299	49.5873	24.2503	24.76	23.2848	24.1661	22.8751	22.3917	23.2519	24.2897	23.3843	22.6072	22.6603	19.8647	22.42	24.3908	21.5413	23.0757	23.1526	24.0461
MA-00334-326	49.573	35.7726	36.0753	35.5209	36.043	35.9784	35.9891	35.4051	35.6813	35.581	35.2301	34.9677	35.0832	34.7201	34.8042	34.5978	34.1068	34.6735	34.4519
MA-00213-478	49.556	23.3099	22.934	22.5162	23.5669	24.2679	23.5367	22.8593	21.5977	23.1841	24.1675	22.9354	22.8652	23.1495	23.0402	24.2387	21.8077	21.3294	22.1238
MA-00055-89	49.5559	29.239	29.6905	28.838	29.6886	29.3261	29.646	27.5436	28.6776	28.2588	28.6005	28.9828	28.4786	30.8173	31.4529	28.3624	30.1024	30.2307	30.266
MA-00334-462	49.5421	32.5663	32.656	32.5787	32.8126	32.2934	32.7082	31.224	31.6452	31.7645	31.43	31.2726	31.4125	31.4134	31.4249	31.2332	31.1809	31.1815	31.5036
MA-00120-95	49.4976	32.5625	32.5556	32.1025	32.0015	31.4785	32.4309	30.8855	31.4714	31.1554	31.2479	31.0446	31.19	30.9796	31.0146	31.4315	30.6602	30.5833	30.5956
MA-00055-216	49.4008	24.2353	26.5575	26.192	26.7286	28.3356	26.2115	28.2748	27.1096	28.1042	28.4442	28.683	28.0699	27.7085	28.0936	27.9166	27.2781	27.7174	28.5358
MA-00162-24	49.3882	21.8765	21.2249	22.1852	23.2111	22.9889	23.1106	22.7251	22.5253	23.2558	23.6712	23.5473	23.0011	24.0178	23.5854	23.7558	21.9734	22.4475	22.5676
MA-00334-166	49.3825	22.3496	22.6257	23.1418	20.2985	22.2489	23.6598	24.0391	24.5235	24.4695	24.8266	24.1184	24.6398	24.8953	24.6126	24.7125	23.6703	23.3286	24.2304
MA-00320-54	49.3756	32.8829	32.9113	32.5115	33.5978	33.0051	33.3828	33.5527	34.2048	33.8422	34.4334	34.3568	34.3436	34.3892	34.3763	34.3436	33.8974	33.9763	34.3236
MA-00210-158	49.308	27.2879	27.9245	26.6285	27.2549	27.76	27.5767	25.9908	26.2617	26.0504	25.9894	26.0811	26.2542	26.1451	25.8131	25.6732	25.7294	25.745	26.1573
MA-00073-234	49.1993	23.877	24.8027	23.2413	23.3786	24.3243	23.4956	24.7585	23.8679	24.7278	24.7045	24.3094	24.6374	25.1208	25.2152	25.9563	24.2301	21.6642	24.895
MA-00213-310	49.1954	26.6087	27.223	26.0621	26.206	26.9151	26.7972	25.9956	25.8121	26.0988	26.3369	26.1657	26.3882	27.3262	26.8681	26.4704	24.9687	25.2441	24.7788
MA-00153-616	48.971	30.2535	30.545	30.3532	29.6724	29.4088	29.9443	29.0977	28.5185	28.5838	28.6665	28.3232	28.6538	29.1023	28.7764	28.8631	29.4031	29.193	29.3814
MA-00139-42	48.903	24.8873	25.5221	24.7704	25.4396	25.9454	25.9333	25.065	24.7181	25.6882	26.0624	23.8405	25.9408	27.0151	27.0314	26.5908	26.3692	24.7967	26.0661
MA-00334-150	48.8795	32.4244	32.3458	31.6923	32.846	32.5984	32.8302	33.0015	33.4823	33.3303	33.6088	33.4458	33.4334	33.9417	34.2336	33.4083	33.5527	33.4083	33.7751
MA-00111-2	48.8408	25.8414	26.0349	26.329	26.5896	25.4987	26.4698	25.6714	25.8551	26.0684	25.1648	24.3396	24.2332	24.1406	25.0857	24.2451	24.3823	25.3558	26.3482
MA-00297-405	48.8205	25.6872	26.7107	26.9984	27.4734	27.1314	27.2089	28.0535	28.1559	28.2605	28.2922	28.508	28.3895	28.3473	28.2196	27.8335	27.6145	27.699	28.1737
MA-00090-382	48.7507	24.5023	24.0245	24.2179	24.3612	24.544	24.8269	24.6068	23.7964	23.8787	21.5467	21.8243	23.8458	22.0093	21.4878	25.8285	23.2711	23.4554	23.1716
MA-00111-46	48.6778	28.1802	28.7186	27.6391	29.2643	29.1257	29.2441	29.2996	29.6918	29.6667	29.9919	30.3087	30.302	29.7636	30.2149	29.7255	29.5919	29.5251	29.8834
MA-00067-20	48.6311	26.4927	26.2897	25.7433	27.3403	25.3388	27.267	24.0361	24.0171	25.7372	24.1626	25.0576	25.4638	28.8946	25.3045	25.2776	25.6633	23.4833	25.8978
MA-00112-143	48.6051	26.607	26.8062	25.5276	27.3477	26.011	26.6879	27.7824	28.0521	27.4187	28.3641	28.1415	28.524	27.1335	26.904	27.6067	27.4741	26.6751	27.1375
MA-00153-311	48.594	27.7874	28.0485	26.5214	28.4911	27.4438	27.9928	28.0979	28.9066	28.3828	28.7817	28.4741	29.4503	29.617	29.4602	28.8092	28.0915	28.429	29.0363
MA-00067-102	48.5213	24.711	25.2045	25.3288	25.7982	25.1585	24.4747	25.6163	26.1578	26.023	26.1984	26.3466	26.8403	26.2692	26.8742	26.757	26.2115	26.33	26.5999
MA-00073-569	48.1237	26.423	26.2432	25.6772	26.144	27.0523	26.5404	24.0161	24.9138	24.8673	25.3081	26.2912	25.8726	26.6153	25.8624	25.646	25.6073	25.2698	26.817
MA-00268-15	48.038	25.015	24.9836	23.2046	25.2298	25.184	25.2898	23.9575	24.3263	24.4952	24.1656	23.6975	24.4396	24.4892	24.5514	24.3154	22.8627	23.6059	22.9813
MA-00073-487	47.9917	23.9136	24.6034	23.4214	23.3525	24.312	24.7101	24.7684	25.7217	25.1362	26.5545	25.008	24.8543	25.2622	23.4415	25.007	22.4942	22.6555	24.3552
MA-00270-140	47.8678	35.4913	35.5179	35.1791	36.099	35.8399	36.1641	35.8677	36.3253	36.1242	35.6576	35.7021	35.6522	35.581	35.4209	35.4489	34.1679	34.2759	34.5978
MA-00139-133	47.7523	25.9876	25.676	25.5086	23.3705	26.0089	26.3059	23.1102	22.8219	24.2314	24.2234	23.3998	24.9316	23.8969	24.1391	25.0001	25.5988	24.8461	25.4988
MA-00184-457	47.743	27.0505	26.5519	26.7554	27.4672	26.272	27.1766	26.4448	27.0327	26.8281	27.0595	26.7011	27.2358	28.5213	28.7842	26.8599	27.39	26.6962	23.212
MA-00334-193	47.6538	27.1153	27.2094	25.9111	27.7293	26.5923	27.4187	28.1147	28.2537	27.9837	28.553	28.4126	28.4007	28.7898	27.8091	28.281	28.6366	28.1181	28.8827
MA-00055-2	47.5602	27.3135	27.7761	27.2675	26.6178	27.7238	26.8584	26.7996	25.7368	26.2109	26.2435	25.1708	26.6498	25.4879	26.757	26.1967	24.6948	25.5012	25.7342
MA-00297-364	47.5311	27.0022	26.8913	26.0495	26.4549	26.8091	26.5905	26.514	25.8933	26.6816	26.1127	26.4203	25.7711	25.0937	26.0354	26.2238	24.2784	25.4672	23.441
MA-00073-245	47.4964	25.0352	26.013	25.3178	24.6265	24.2663	25.3902	24.86	23.7785	23.9301	23.0384	24.5384	23.5529	23.1799	24.8272	23.607	24.1174	24.5642	24.0443
MA-00072-331	47.4783	24.7769	24.6949	24.3249	25.7327	25.3523	26.2134	26.0416	27.0799	26.6095	24.4823	25.0292	26.1047	25.3797	24.9267	24.5602	25.0132	25.5667	26.6034
REV__MA-00317-39	47.3124	26.8009	24.9371	24.2689	26.1522	25.235	26.6532	26.1457	25.5579	25.7218	24.378	25.032	25.193	24.5446	25.8147	25.0701	24.3071	23.8997	22.9875
MA-00213-64	47.1731	25.9706	26.6176	25.3949	26.2655	26.3066	26.0518	25.9618	24.9728	24.1738	25.1951	24.6683	24.9983	23.5318	26.3244	24.4695	24.775	24.4323	25.4925
MA-00184-390	47.1429	27.9348	27.2532	27.3357	28.1401	28.459	28.522	28.5355	28.8595	28.6533	28.9568	29.0252	28.837	29.4403	28.8051	28.8546	29.1569	29.1955	29.3845
MA-00297-43	47.1289	29.8391	30.7727	29.7768	31.8964	31.9848	31.8933	30.3828	30.9798	30.3509	30.0991	30.4429	30.1932	30.6676	30.4338	30.5245	29.8723	31.2715	29.7544
MA-00101-244	47.0295	25.52	26.4588	25.5703	25.3157	25.7162	25.434	25.2089	25.462	24.8957	26.1238	26.0356	26.7069	26.7003	27.101	26.8272	26.5659	26.46	26.8157
MA-00297-477	47.02	27.592	28.28	27.6849	28.1663	27.7837	28.6238	27.9278	27.8434	26.4534	27.5063	27.0577	26.7895	27.6218	26.2415	25.9271	26.5607	25.6442	25.8505
MA-00162-300	46.9592	28.4455	28.0741	28.4257	28.6406	28.3936	28.7794	28.1157	28.2728	27.8717	26.6777	27.5894	27.6416	28.0376	27.8986	28.3139	26.6087	26.6345	26.9695
MA-00153-283	46.9511	28.6207	27.8676	27.6436	27.7278	28.2115	28.1153	27.1558	26.7959	26.9005	27.1469	27.3239	27.777	28.0783	26.8815	27.5295	26.4127	25.7722	26.375
MA-00101-622	46.8556	25.5435	26.4637	25.1975	26.1882	25.761	25.4581	26.1967	25.8112	26.4369	26.6694	23.7503	27.64	26.9063	28.5064	26.2467	26.9778	27.5725	27.4969
MA-00189-493	46.7783	27.8099	27.7636	27.1804	28.3494	28.3694	28.6956	28.0783	28.7077	28.7249	28.9973	29.0431	29.4573	29.5704	29.1035	29.4077	29.1272	29.4052	29.7043
MA-00213-559	46.7745	27.9054	27.9001	28.6315	28.3735	25.0657	28.0981	28.479	27.8919	27.1444	26.2224	27.3638	28.003	27.1122	26.826	26.1012	25.6938	26.1627	27.733
MA-00184-437	46.7699	26.4266	26.4504	26.0336	26.2142	26.649	25.6284	24.4956	25.1091	24.2975	25.0602	25.5031	25.1636	25.2207	24.4506	25.4568	25.729	24.3651	25.7298
MA-00184-374	46.7187	27.061	27.0582	27.0318	24.8103	24.9517	27.6101	26.9316	24.2688	27.1521	27.3371	27.2548	26.8923	26.967	26.68	24.9798	25.5066	24.9218	25.8134
MA-00101-191	46.6295	25.7367	26.1625	26.1333	23.879	23.7463	25.4396	24.2094	25.406	25.1153	25.5816	24.0508	23.9503	26.0483	26.0518	25.8527	24.9148	25.1881	25.7915
MA-00073-421	46.5353	26.4647	24.8589	26.3373	26.8926	25.5089	26.9657	23.4679	26.2783	26.7489	25.9835	25.9434	26.5511	26.9216	26.6874	25.8022	23.9951	22.2611	25.4643
MA-00120-175	46.5333	28.1532	28.5255	27.7116	28.4985	28.0716	28.6181	27.2147	27.351	27.1284	26.991	26.9272	26.7429	27.5433	26.8876	27.0406	27.1644	27.1566	27.7245
MA-00101-255	46.2635	23.6308	25.3964	23.939	26.4525	25.1838	24.8225	25.3183	24.9015	25.7989	25.6417	26.3054	26.4499	25.7005	26.7287	25.2244	24.6595	26.0514	24.7918
MA-00182-346	46.2627	27.3095	27.5084	27.3102	27.5402	27.216	27.5905	26.5901	27.2197	27.3002	27.394	25.8816	27.6922	26.8054	26.5186	26.5086	23.9329	24.7985	26.2142
MA-00184-560	46.2368	24.3444	22.0252	24.198	21.125	24.7876	25.1007	21.205	24.1187	22.2183	24.5589	21.4327	22.8661	24.5052	22.9909	22.2814	23.5988	25.1237	24.8519
MA-00268-13	46.2258	25.8377	24.7459	25.7376	25.5973	25.4197	25.3433	23.1552	24.9274	25.6185	26.0722	24.8609	24.3003	27.6605	29.1167	24.9314	26.8967	24.2924	26.6523
MA-00184-241	46.2217	28.0599	28.0778	27.4804	28.5027	28.688	28.31	27.6847	27.9953	28.2073	27.5225	27.0268	28.0003	27.8826	28.534	26.8097	26.4305	25.9997	26.9109
MA-00334-254	46.2216	30.7368	31.3261	30.0737	31.2661	30.3047	30.667	29.6031	29.3256	29.6542	29.1003	29.2806	29.3594	29.3374	29.2914	29.1157	29.1101	30.2245	29.5458
MA-00268-104	46.1842	26.4557	26.8094	26.4538	26.0864	25.7228	25.9247	24.9183	25.2611	25.0524	24.9359	24.9352	24.9385	25.6196	24.8839	25.2697	25.1042	25.5688	25.579
MA-00153-452	46.1292	29.8023	30.2969	29.7059	30.7065	29.711	30.2665	28.851	28.8814	28.8655	28.4096	29.2763	28.5222	28.7759	28.9383	28.3931	28.7418	28.7308	29.6089
MA-00073-419	46.0976	23.0787	23.2314	23.3	24.7517	23.6165	24.2684	24.8379	24.0293	24.1117	25.5571	24.5251	25.6001	24.5634	24.5273	24.2244	24.1935	23.5343	24.0411
MA-00153-136	46.0917	25.4778	24.2768	25.2918	24.857	24.4219	24.9663	23.1057	23.3077	24.5083	23.8218	23.1018	23.2116	23.9844	25.1955	23.7018	23.0002	23.8777	24.8647
MA-00153-613	46.0702	27.1906	26.7784	26.9075	28.1673	27.9947	27.9582	28.3504	27.8834	28.6064	28.6681	28.9142	28.4992	28.5538	29.1526	29.1135	28.0914	28.6064	28.9728
MA-00297-468	46.0298	23.6884	24.8803	24.2329	22.3188	25.1008	25.0762	24.161	25.0813	24.2465	24.9899	27.2666	24.8641	25.4306	27.3321	24.4478	26.9178	27.1753	25.7435
MA-00153-658	45.8654	25.1736	25.1761	24.937	25.3531	23.2564	21.4612	24.6996	25.6079	24.9621	24.731	24.6451	23.974	26.3048	26.0255	24.7895	25.5516	25.4741	26.1178
MA-00326-5	45.6986	24.2981	24.7121	24.9887	20.9682	24.9692	24.2219	22.2614	23.6898	21.1786	23.4299	22.7745	22.0343	23.0997	22.4588	21.5232	22.816	23.2755	23.6589
MA-00092-1	45.5624	24.7591	24.6465	24.8278	27.3153	25.6107	24.9033	25.2249	25.4514	25.6215	26.0096	24.7811	21.5369	24.8517	24.9322	20.9156	25.3681	24.071	25.2603
MA-00101-139	45.5218	25.4367	26.217	23.639	25.966	27.302	26.1223	23.8658	24.3853	24.68	24.4543	25.2855	25.1631	24.3484	23.054	25.3174	24.407	22.4082	24.473
MA-00153-500	45.3957	24.2352	24.8706	24.1544	25.3687	24.6723	26.2888	25.7535	26.142	25.9551	24.4273	24.6341	25.6643	25.9781	24.6348	25.0317	25.5311	27.0556	25.7754
MA-00067-130	45.2838	28.4183	28.6526	28.2392	28.5456	28.0488	28.0728	27.2634	27.3475	27.187	27.3241	26.734	26.9731	26.8965	27.4673	27.3512	26.2516	27.0467	27.1177
MA-00139-265	45.2346	27.4192	28.1534	27.224	27.7082	27.8348	27.7342	27.0878	25.3339	25.6561	27.9568	28.3367	28.4387	27.7152	28.9687	25.8373	25.9972	26.1209	28.073
MA-00153-448	45.1895	23.1325	24.4858	23.0158	24.8499	23.2608	23.0758	22.9944	22.7076	24.266	22.2718	21.4183	24.0235	24.1168	28.728	24.072	23.615	22.981	25.6937
MA-00101-440	45.1667	24.9696	24.2577	24.6095	24.9664	25.5811	25.9586	26.101	26.2471	24.047	23.602	25.3339	23.7179	26.9544	26.4103	25.0341	24.5696	25.3337	25.5757
MA-00213-100	45.1314	22.0275	21.7917	21.925	22.2888	22.7557	23.5694	22.6489	22.3966	21.9036	22.3523	21.2154	22.1634	23.2274	23.598	24.1516	21.5924	20.5594	21.6469
MA-00162-104	45.1272	25.1805	25.008	24.7411	25.1778	23.6205	23.1076	23.6748	21.7844	22.4813	24.7334	27.0612	24.7472	24.935	24.8873	24.4506	21.6278	23.9875	25.4243
MA-00112-19	44.9999	26.5865	26.6967	26.1597	27.1272	27.0514	27.6014	27.5386	28.4745	28.2088	27.8221	27.8338	28.2009	28.4051	27.7444	27.8827	27.2932	27.6412	27.7349
MA-00101-256	44.9199	25.5581	23.8919	25.4069	22.7132	23.7507	24.8095	23.6744	25.2105	24.8228	23.2463	23.9606	22.942	24.4466	25.9003	24.273	25.1234	24.8853	23.7306
MA-00090-295	44.9035	30.8818	30.9157	30.5481	30.5296	30.1657	30.8242	29.2994	29.3978	29.6785	29.2264	29.6366	29.7734	29.7641	29.3874	29.1663	29.7352	29.7689	29.4664
MA-00320-40	44.7884	26.6071	26.5074	25.4605	25.5727	24.5487	24.7406	25.077	24.11	25.1502	25.1247	25.4114	24.868	25.8115	24.1341	23.6782	24.9861	23.7756	22.9305
MA-00120-195	44.7274	29.4198	29.8806	29.0321	28.8683	28.615	28.6207	27.8388	28.1025	27.7818	28.1549	28.3345	28.3188	29.8465	29.9221	28.6967	29.178	29.0543	29.4081
MA-00213-515	44.6766	30.0338	30.4576	29.8222	29.995	29.7091	30.0835	28.8195	29.5329	28.9639	28.9229	28.582	29.2257	28.6914	29.1878	28.7202	27.7218	28.7769	28.5666
MA-00334-350	44.6474	27.292	26.5491	25.7124	26.664	25.4889	26.2488	27.255	26.4676	27.3096	28.2638	27.7362	27.6204	28.3022	26.9119	26.4346	26.0596	26.611	27.8762
MA-00334-179	44.6445	22.5927	23.0035	23.4051	23.6758	23.5879	22.7743	23.3521	24.633	23.6801	24.6731	23.6526	24.2113	24.4035	24.5414	24.5551	23.8874	24.4602	24.6422
MA-00182-148	44.526	28.1774	28.64	27.5324	29.5167	29.08	29.6255	29.3364	29.4736	29.4308	29.7161	29.7301	29.2992	29.9113	29.9772	29.8701	29.9935	30.0947	30.1588
MA-00326-29	44.5026	29.7965	29.4066	29.1353	30.827	30.0605	30.5293	31.2261	30.985	30.5201	31.3873	30.5716	31.2702	31.0861	31.184	30.5186	31.0601	29.9704	31.1007
MA-00184-579	44.4495	29.8815	30.2726	29.5884	30.8234	29.8963	29.5949	29.6222	30.1985	30.0607	30.5917	30.4992	30.2485	31.5386	31.7848	30.1724	31.1682	30.9111	31.599
MA-00090-447	44.3558	27.2019	27.659	27.6709	27.8255	27.8445	27.9041	26.6802	26.6851	26.7737	26.045	26.0509	26.5311	27.2482	26.8963	26.1321	26.6074	26.5878	27.356
MA-00182-102	44.3486	27.2957	27.7848	27.1444	27.4128	27.162	27.1231	26.4148	26.827	26.7124	26.0078	25.6474	26.2374	26.8986	26.1016	25.765	24.8633	26.3837	26.3965
MA-00334-97	44.2834	25.2941	22.3315	20.4417	24.3201	24.5209	24.7172	24.5516	24.7488	24.5384	22.4518	23.8233	24.0346	24.1627	24.032	24.5602	24.8837	24.2607	23.5527
MA-00153-466	44.2538	25.8784	25.9413	25.1926	26.2114	26.2727	26.5542	26.9679	26.8893	27.0142	26.9623	27.0815	27.536	27.4469	27.1968	27.2914	27.2145	27.6284	28.2943
MA-00120-91	44.2335	23.9979	23.6466	22.0768	22.6642	23.506	23.829	22.77	22.4356	23.132	23.2388	23.0474	23.2449	23.6569	23.5433	23.6	22.1086	21.7907	21.1953
MA-00320-23	44.1483	25.4013	25.8013	25.4719	26.1123	25.0126	25.2519	25.9806	26.5269	25.9969	27.0066	26.9854	26.5548	26.6302	26.8597	26.5226	26.7818	26.451	26.5714
MA-00326-188	44.052	35.386	35.6918	35.0349	35.3633	35.0471	35.3336	33.9591	34.2828	34.0512	34.13	34.13	34.1146	34.1223	34.212	34.0592	33.9417	34.5354	34.3303
MA-00189-356	43.9595	23.5302	23.1961	22.3026	22.7239	23.4761	23.5505	22.2661	21.9553	22.5044	22.077	21.8962	21.7459	21.2485	21.6011	22.8174	21.6499	22.3976	21.7255
MA-00049-3	43.9555	27.2152	27.3039	26.1449	26.3687	27.0758	25.9351	26.0757	25.7736	25.6737	25.9784	26.469	25.8973	26.4684	23.7249	25.8154	24.6885	25.0079	24.5933
MA-00268-25	43.878	26.3441	23.5573	25.322	26.4079	24.9507	26.0842	26.4353	27.532	26.8041	27.6314	27.9034	27.4733	28.0396	26.7262	26.7371	27.7221	26.495	26.8089
MA-00320-68	43.8404	27.7209	28.344	27.0506	28.1051	27.9337	27.0537	25.6354	28.4809	26.8691	26.0268	25.4058	25.7695	27.6929	29.0843	26.2006	27.3273	26.2088	26.8947
MA-00101-333	43.8194	25.0057	25.3936	24.5449	24.8374	25.0201	24.7774	26.1781	26.2388	26.4404	27.0703	26.1006	26.3174	26.0289	25.5422	26.4843	26.3926	26.336	26.5095
MA-00090-104	43.7593	21.063	25.6751	24.6491	24.0757	22.2165	23.5592	23.3668	23.7427	23.8232	23.8679	25.4778	24.6908	24.8774	24.714	23.7157	25.3717	24.6272	25.0831
MA-00297-168	43.7451	27.1706	27.3351	27.1157	27.9101	24.8744	26.8744	25.6254	26.9872	27.7376	27.7979	27.8907	28.0779	28.6411	28.5692	28.4207	27.4667	27.4512	27.3699
MA-00090-409	43.6926	23.686	23.7728	24.0662	24.7292	23.8744	25.4985	23.6532	22.7784	23.9143	22.7838	22.6092	22.6603	23.322	23.395	23.7136	22.6343	22.635	23.0362
MA-00101-200	43.5508	28.5041	28.2781	28.6373	29.3298	28.7523	28.7165	27.9967	27.5181	27.8983	28.2952	27.8979	28.5108	28.3263	26.4339	27.683	26.6687	26.9439	27.5614
MA-00120-372	43.4033	26.3149	27.19	26.5139	26.4311	26.6858	26.4791	27.5625	27.0613	27.803	28.1796	26.7576	29.1778	29.0478	27.5668	28.1276	27.7614	28.2791	28.0992
MA-00184-282	43.33	29.697	29.8551	29.5021	31.0424	30.6173	30.8256	30.4457	28.0224	31.0864	30.7156	31.5326	31.0816	31.2901	30.8328	31.1699	30.9261	31.0664	31.3408
MA-00323-160	43.3024	30.8686	31.08	30.5992	31.0878	30.2673	30.4097	28.9738	29.3405	29.8212	28.9834	29.2644	29.6076	30.2454	30.5701	28.5416	29.2295	29.5602	29.5315
MA-00184-480	43.2409	23.8103	24.0365	24.152	24.2597	23.7401	24.168	23.0551	23.0058	22.8783	23.5692	23.7157	23.5476	23.1776	23.0781	22.7692	24.3131	25.9808	24.4693
MA-00203-21	43.2393	25.9626	27.0037	25.6014	25.3387	26.235	25.5189	24.2696	24.7715	24.3566	24.2291	24.4948	24.4528	25.7219	22.9463	25.1618	23.9808	24.5099	25.0031
MA-00162-11	43.2094	26.0365	23.2447	24.506	23.9679	22.925	25.3101	25.9591	24.7555	26.0785	26.616	26.5656	26.5941	26.5055	27.3309	26.9588	24.3645	26.7874	26.9136
MA-00067-285	43.2015	23.5472	25.7218	24.7714	26.2607	24.967	26.328	25.6431	24.9063	25.8823	24.2179	25.1496	25.4333	24.9199	22.5385	24.9712	24.8729	25.4939	25.9523
MA-00101-619	43.1355	35.5412	35.4334	34.7252	35.7946	35.8328	35.8375	35.5441	35.6388	35.5556	35.4489	34.6143	35.4823	35.5002	36.0204	35.5584	34.1068	34.3303	33.5641
MA-00162-97	43.1267	24.2176	26.2113	25.1462	24.6391	27.0381	25.7745	23.8295	24.4735	24.3051	24.1848	24.5938	25.3962	25.0853	25.6597	25.7218	25.5207	25.6826	26.014
MA-00297-258	43.0862	26.6599	26.7204	25.8815	26.9993	25.8314	26.4977	27.2867	27.2879	27.5743	28.0434	27.3407	28.0248	27.8557	27.9911	27.5415	27.2001	28.0889	27.8244
MA-00055-55	43.085	24.7709	25.5873	25.5744	26.9075	26.1068	26.5089	24.1863	25.9408	25.535	26.8684	26.2776	27.0826	26.3016	26.94	25.8959	27.3639	27.3699	27.388
MA-00189-372	42.9478	23.4051	23.3736	23.8555	23.7285	24.8644	24.1727	23.7749	23.7413	23.8134	24.8498	24.832	24.2296	24.9665	23.8672	22.752	22.8487	23.5949	22.322
MA-00270-105	42.8681	25.3847	25.8189	25.3329	25.378	24.7595	25.4066	25.3696	25.2741	25.2722	22.1783	24.4901	24.9938	24.7886	24.6601	22.8142	24.5837	24.2616	25.2618
MA-00182-257	42.7961	25.0176	25.0544	25.0654	24.2067	25.1088	25.1264	23.2801	23.8361	24.0827	23.5642	23.0148	23.973	23.7119	21.9257	23.6249	23.2293	23.2024	23.8863
MA-00073-417	42.7001	30.3915	31.5498	30.8092	31.099	30.9746	30.3381	30.1799	30.0109	30.1586	29.3099	29.0583	28.9545	30.5467	28.9051	29.3568	29.5459	28.5216	29.9282
MA-00213-546	42.6666	31.1664	31.04	28.3747	30.3409	31.2485	32.5132	30.8379	30.94	31.051	31.6038	31.0607	31.9553	31.8706	32.8153	32.5038	30.8534	30.3895	30.7328
MA-00184-338	42.6234	24.1831	23.5763	21.4284	22.2436	24.2143	25.1044	21.0187	20.0243	22.9058	22.1737	23.1601	22.7829	23.7599	23.4336	23.0389	23.3257	24.1039	23.7165
MA-00153-62	42.5673	34.4458	34.5641	34.13	34.337	33.8328	34.3101	33.2619	33.2619	33.3033	32.9259	32.9766	32.9109	33.0869	33.1971	33.0975	33.0226	33.5062	33.6944
MA-00072-196	42.4001	30.7292	31.0522	30.3858	31.0245	30.583	31.1768	29.7226	30.2437	29.987	29.5427	29.6293	29.6947	29.9041	29.6417	29.7922	29.1748	29.7994	29.555
MA-00184-303	42.3737	23.8779	24.8402	24.5378	22.6326	23.0165	24.3491	22.3572	22.9004	23.6336	22.4853	22.4828	22.2286	22.989	23.0513	23.768	22.6522	22.0638	22.4039
MA-00182-206	42.3499	26.5032	26.5996	25.9493	26.1338	26.3863	26.4123	25.1667	25.7844	25.716	25.733	25.5883	25.5927	25.4047	24.5644	25.0581	24.9671	23.3239	23.814
MA-00101-468	42.3035	27.9272	27.7505	27.5899	25.8814	27.1739	26.8877	26.0242	26.453	26.4168	27.0355	25.9845	25.9108	26.3581	26.1497	26.5667	26.6144	26.2769	25.6075
MA-00189-215	42.216	26.1092	25.9322	25.546	24.2551	25.7025	25.9417	25.0775	24.8198	26.551	23.9951	25.7115	25.7486	25.1924	24.3062	24.8613	23.5915	24.0104	24.722
MA-00153-133	42.2022	27.5644	26.208	26.0918	27.0687	27.2247	26.7949	27.2525	27.6342	28.2077	28.4142	28.2827	28.3007	28.1943	28.1157	28.4537	27.8185	26.8218	27.7004
MA-00323-82	42.1931	26.7584	27.2859	26.0979	26.4548	25.9479	27.208	25.6574	26.5213	26.0581	24.7321	25.4989	26.1456	25.6805	25.9349	25.214	25.8065	25.0564	25.2081
MA-00189-81	42.1126	28.0288	27.8689	27.6721	27.9392	27.8892	28.7075	26.8013	26.6255	27.3919	26.7438	26.8464	27.425	27.373	27.4226	27.1834	26.2974	26.7951	26.4893
MA-00173-39	42.112	24.5858	25.3588	25.6744	24.422	26.9827	24.975	24.2733	23.215	24.0388	23.6087	23.5863	24.1941	23.4697	23.9995	23.824	23.5578	23.6672	23.3313
MA-00139-375	42.0494	27.1252	28.1364	27.1983	27.8627	28.0938	27.5603	26.4155	27.7289	27.0436	26.5035	27.0015	23.5496	27.3451	27.1028	27.1447	27.0671	23.381	27.0969
MA-00213-418	41.9538	24.7925	24.265	27.0579	23.0637	24.0492	24.0817	22.199	24.1091	23.8902	23.6572	22.67	24.2742	22.8604	24.9499	24.1926	24.2309	24.3379	24.1908
MA-00297-526	41.94	23.7778	26.2062	25.3984	24.9384	25.3665	24.9155	26.064	26.48	26.2393	26.2984	26.796	25.4341	25.1815	25.957	23.5157	25.4017	24.8731	25.3603
MA-00323-162	41.9356	25.8901	25.9303	25.5896	26.1531	26.7178	25.7785	24.9409	25.5145	23.5958	24.5071	25.2338	25.2822	24.6806	25.0262	25.2056	25.2875	25.4964	25.1394
MA-00073-270	41.8978	25.9258	26.8831	24.8607	27.522	26.6385	26.9784	27.1686	27.2012	26.798	27.278	27.9846	27.5096	28.1613	26.9562	28.1429	27.1341	25.3119	27.048
MA-00334-16	41.8816	26.1208	25.9867	25.1141	25.5386	23.7286	25.9817	24.6959	23.9733	26.0206	23.5241	24.2772	25.5614	26.9891	25.7952	26.7496	24.3573	24.7885	26.9016
MA-00326-150	41.8785	25.8641	25.7698	25.166	25.6897	26.1209	26.0015	25.7797	27.3174	26.288	26.188	26.3894	27.5179	26.4563	27.5432	27.9631	27.3361	27.2351	27.6876
MA-00153-182	41.8701	25.2838	25.9785	27.3238	27.2126	25.1497	25.4802	26.7586	27.1773	25.2789	27.1533	27.4493	27.3086	27.2968	27.0805	27.1856	27.1081	26.7451	27.7504
MA-00090-271	41.8547	25.3111	26.2128	25.0579	25.6361	24.3149	26.1436	25.0422	24.3514	25.6208	25.7049	23.7427	25.3792	24.8832	25.1474	23.7341	24.0996	23.313	23.6472
MA-00023-38	41.8406	25.3662	25.1204	23.733	25.6495	25.0762	23.9402	25.2917	26.4938	26.2127	25.0695	26.7631	26.4559	26.5968	27.1005	26.7384	25.4137	23.3572	26.326
MA-00334-130	41.8154	27.1815	27.0468	27.4686	27.6705	26.9795	27.9869	27.8086	28.3179	27.5665	27.0378	28.5591	28.6532	28.7428	28.5399	28.6731	28.57	28.4107	28.9544
MA-00213-50	41.7918	29.6864	29.9306	29.1176	30.0083	29.9297	30.1989	28.8017	29.3912	29.3872	29.0561	28.9026	28.9379	28.8596	28.8699	28.8563	28.5043	27.9302	28.4706
MA-00153-618	41.7818	25.4006	26.0178	25.5681	24.8422	24.5433	25.5465	25.4096	25.3126	26.1728	23.8862	24.3259	23.8668	25.7737	25.0516	23.6222	24.4204	24.9454	25.9894
MA-00206-44	41.7537	24.8861	24.2406	24.1558	25.1125	24.9092	25.1862	24.855	25.4586	25.205	24.2686	23.3628	25.6937	24.1561	23.3185	24.2657	23.0984	24.1498	24.0076
MA-00153-594	41.7087	25.1096	24.876	24.4475	24.9111	24.542	25.3126	24.0285	23.4726	23.7645	23.5039	23.7081	23.5112	23.8658	24.3024	23.5517	22.259	22.73	25.0817
MA-00101-77	41.6696	34.0592	34.0832	33.6839	33.933	33.4209	33.8234	33.0497	33.6198	33.3568	32.9142	32.9868	32.8798	32.9847	32.9124	32.6882	32.0561	32.3061	32.5319
MA-00153-380	41.5576	25.9625	27.0943	26.2532	28.0217	26.8606	27.2638	26.447	26.4652	25.8178	25.2084	25.8566	26.0333	26.282	24.6228	25.9754	25.7459	26.8099	25.9115
MA-00213-407	41.4075	27.8451	27.9898	27.8904	27.9326	27.4065	27.9613	27.1561	27.3873	26.9038	27.458	26.808	26.9775	26.7503	26.0341	26.6377	25.9732	26.2968	27.3369
MA-00297-392	41.3576	28.7709	28.5412	27.388	28.2915	29.1295	29.2855	27.5665	26.7103	27.6881	26.8477	27.172	27.6271	27.7395	26.6879	26.8195	27.2385	26.1823	27.5011
MA-00101-617	41.3396	30.2676	30.7136	29.8134	31.5038	31.0838	31.6136	30.5917	30.6544	30.7964	30.5832	30.4024	31.2559	30.4532	31.0274	30.5754	29.3068	29.4667	29.8111
MA-00334-437	41.273	22.8106	23.0727	22.6243	20.351	21.3714	21.318	23.2737	23.6448	20.4817	21.1974	22.1091	21.5964	21.2471	22.2483	23.4599	23.6647	22.1903	23.3538
MA-00112-31	41.2678	27.1507	26.2746	24.6753	28.0134	27.393	27.0925	24.3776	27.5702	26.2855	25.5064	24.7946	26.9002	25.4795	26.9597	26.546	24.2314	26.933	27.3894
MA-00139-362	41.2612	25.4117	24.7546	25.4392	23.5353	23.5536	24.6667	22.6563	23.1494	20.9483	22.8128	23.4916	21.8876	22.9287	23.6495	22.8761	24.7262	23.6066	22.6353
MA-00206-63	41.2538	33.8792	33.8883	33.6944	33.9417	33.6307	34.1377	32.7871	33.0332	33.045	33.0001	32.6899	32.8856	33.114	32.8557	32.9533	32.4459	32.3861	32.4808
MA-00120-73	41.2444	26.2693	26.1847	25.4701	26.9598	26.4311	26.0301	24.7225	25.6408	26.7004	23.9505	26.0804	24.5755	26.4949	25.9465	25.9386	23.0326	23.3035	25.721
MA-00270-95	41.1869	31.4671	31.6887	31.5109	31.2981	30.8425	31.5485	30.2049	30.6199	30.5115	30.2535	30.1598	30.4484	30.4049	30.5189	30.4468	30.234	29.6601	30.3861
MA-00101-164	41.1268	23.7058	23.8733	21.5999	22.7742	25.3281	25.7834	26.2373	25.4053	25.6904	23.3826	25.2643	23.4598	26.1141	25.2701	26.1651	25.6414	25.6192	25.4679
MA-00334-186	41.0528	30.601	30.6551	30.0715	30.8725	30.6164	31.2199	31.0454	31.2616	31.2349	31.6427	31.7027	31.7941	31.9359	32.0332	32.1312	31.4987	31.5555	31.8372
MA-00120-140	40.9902	29.2573	28.8439	28.5845	29.8495	29.5476	29.4653	29.1038	29.4184	29.6081	28.9538	29.3853	29.3305	29.082	29.5694	29.5948	27.7612	28.1709	27.7953
MA-00090-513	40.8702	24.0185	24.2697	23.6114	24.2436	23.7077	23.5305	23.4466	23.3467	23.817	23.1502	22.9132	22.8142	22.4696	22.7618	22.9787	21.6743	22.1907	22.5024
MA-00182-194	40.851	31.3461	31.4761	31.0307	32.0672	31.724	31.9825	32.1584	32.4219	32.4586	32.735	32.8187	32.7195	32.826	32.9148	32.5156	32.2475	32.349	32.5527
MA-00067-160	40.8117	25.5566	26.5868	24.2715	25.7812	26.1322	26.2552	25.602	25.4666	25.2493	26.6341	26.4328	25.7834	26.7667	27.9738	25.3352	27.0392	25.6885	27.7871
MA-00153-606	40.768	25.8297	26.2413	26.0103	25.788	25.8806	25.9205	25.5872	23.0476	25.6049	25.3409	25.5055	25.7771	23.4521	25.9696	25.7576	25.3419	24.9193	23.5686
MA-00297-358	40.7662	27.7529	27.7767	26.7167	26.9517	27.4511	27.9144	25.4487	27.2462	26.8858	26.5079	25.6865	26.9209	27.5361	25.956	26.4149	25.9889	25.9275	25.8001
MA-00139-291	40.7618	30.6881	30.633	30.1105	30.8379	30.4913	30.8176	30.3624	30.5933	30.2104	30.2499	30.0904	30.0239	29.9618	29.5026	29.5866	29.2076	28.6778	29.2488
MA-00111-7	40.7322	27.3567	27.7677	27.9906	28.6194	28.2534	28.9879	25.9341	26.8217	27.4626	28.0914	26.8355	27.4056	28.0288	28.1775	26.5773	26.7809	27.3495	27.6655
MA-00334-131	40.6189	29.5675	29.5655	29.5491	29.9111	29.5513	29.7843	29.9015	30.2471	30.2898	30.5949	30.7672	30.8224	31.035	31.1324	30.7399	30.5421	30.33	30.7622
MA-00297-352	40.6002	26.6939	26.7953	26.1376	27.4798	24.8667	27.9819	27.5581	27.9582	27.6	27.9414	28.0193	28.1587	28.1618	25.9034	28.0098	27.7991	28.9355	28.6707
MA-00112-88	40.5384	29.585	29.7834	29.5006	29.2135	29.3004	29.7577	28.6711	28.8782	28.9112	28.2794	28.216	28.4382	28.5897	28.837	28.3314	28.3005	28.1652	28.1563
MA-00184-280	40.5265	25.2264	25.1752	25.8643	24.7416	25.7254	26.3834	25.6402	26.5541	26.8409	23.1586	25.3875	24.6692	26.061	24.5865	25.408	25.4072	25.2179	23.9498
MA-00268-105	40.5254	23.238	24.9436	22.801	23.624	23.0945	23.1822	24.9267	24.4583	25.1858	24.6619	25.2511	24.9637	24.062	23.6009	24.6139	24.4551	23.9087	24.9629
MA-00323-8	40.503	28.62	29.0829	28.5347	29.7792	29.0969	29.267	29.3032	30.0088	29.7896	30.0733	29.652	30.1193	30.2712	30.5493	30.078	30.0806	30.0069	30.4687
MA-00189-255	40.4532	24.5857	25.6246	25.934	25.184	24.4669	25.5806	23.3623	23.9748	24.5946	24.1321	24.1716	25.177	24.3889	23.6908	24.7175	23.1448	24.5619	24.487
MA-00162-386	40.3942	25.5918	26.5095	27.0297	27.8155	24.3485	26.9307	26.5495	26.8755	27.185	25.1498	25.7768	25.9742	24.7117	25.3381	26.6404	23.078	22.8579	26.1198
MA-00162-249	40.3442	25.416	25.3333	24.9498	25.2115	24.5949	26.1278	24.2285	23.5009	24.7084	24.1162	23.6976	24.31	25.7923	26.9178	23.9536	26.3901	25.9297	24.6268
MA-00182-170	40.3384	23.0724	21.9804	22.361	23.2785	22.978	22.8335	23.1736	23.2785	23.1782	24.0902	22.1378	22.6704	22.6872	22.2317	23.208	24.8143	23.5272	24.9234
MA-00189-379	40.2025	24.5684	24.0043	24.5443	23.0258	25.3991	25.5429	23.0843	23.012	24.2437	25.4685	25.3826	23.9995	21.5298	25.7773	25.9387	23.7412	21.2442	22.2507
MA-00055-34	40.1808	28.5358	28.7169	27.9995	28.1912	28.2851	27.9203	28.076	28.9547	28.7646	29.2808	29.4179	28.8569	29.5033	29.5241	29.4844	29.1899	29.5057	29.8924
MA-00073-26	40.1533	23.2531	23.8285	22.827	23.2644	22.5204	20.9656	21.4993	19.8464	22.4429	23.0363	23.8855	21.7684	22.9076	20.3632	24.358	20.5374	20.2225	24.9355
MA-00334-40	40.131	29.0891	29.3222	28.7593	28.8321	28.3961	28.6234	26.2794	27.5505	27.986	27.2311	28.116	27.2094	27.5866	27.7352	27.7453	27.7151	29.2668	27.7583
MA-00189-172	40.0753	26.7818	26.894	26.5517	26.6619	26.8474	27.0066	25.9926	25.3438	27.091	26.4439	26.5203	25.6548	25.1922	25.4105	26.1578	25.4884	26.6816	23.8859
MA-00184-219	40.0014	26.1751	26.6214	25.8723	27.83	26.5986	26.6433	25.8659	26.1546	25.9309	25.673	25.1271	24.9816	26.8866	26.2648	25.2186	26.7646	25.9162	27.0538
MA-00184-191	39.9429	27.5477	27.6615	25.9399	26.5158	27.2373	27.7546	26.8323	25.6856	26.8023	26.5349	26.6751	26.8975	26.376	26.3262	26.1603	25.2394	26.1904	25.3492
MA-00184-350	39.8798	26.9626	26.3673	26.1376	26.4418	27.7795	25.2762	27.5245	27.2166	26.5709	27.5754	28.2295	27.3717	28.0966	28.0688	26.7945	27.9714	27.3937	28.7169
MA-00323-109	39.7724	28.4768	29.059	28.4972	29.2171	28.5883	28.8402	27.9302	27.9668	28.2562	28.3264	27.8374	28.1477	27.9406	27.819	27.6174	27.0737	27.4078	27.3955
MA-00073-322	39.7654	25.475	26.0113	24.7843	25.5533	26.4424	25.8295	26.3897	26.9638	27.0341	27.4906	26.7361	26.9823	27.913	27.3903	27.271	27.263	26.6036	27.5889
MA-00182-159	39.6932	25.5096	26.0827	26.2645	25.663	26.172	26.2173	24.4699	25.4156	24.3159	24.474	25.0648	24.5797	25.2008	24.7621	25.4863	24.0057	25.2912	25.0921
MA-00297-265	39.69	25.688	25.5001	23.9067	25.5412	25.5745	24.3381	25.3407	25.6553	25.9698	25.2628	25.8735	24.3932	25.1523	28.0495	25.9265	23.6202	22.4218	23.7841
MA-00184-558	39.5794	26.9365	26.2968	25.9243	26.0118	26.4435	27.142	26.0174	25.9638	26.1818	25.7368	24.8917	26.0141	26.1988	26.2586	25.1197	24.7876	25.054	25.0438
MA-00067-340	39.5474	22.72	22.9202	23.6267	21.9989	22.0918	22.91	23.6205	23.8032	22.602	22.2143	21.2025	22.3098	21.8282	24.6069	21.8739	21.8662	24.0753	25.6131
MA-00090-469	39.4919	29.2761	28.7109	27.7848	28.8761	28.7678	28.5979	27.7859	27.9311	28.3324	26.7562	26.9633	27.2895	27.4508	27.7005	27.4328	26.774	27.9017	27.8996
MA-00072-332	39.4771	30.2048	30.2584	30.1672	31.5081	31.2632	31.6114	31.7771	31.9528	31.813	31.3407	31.4829	31.5255	31.6634	31.1783	31.098	31.0133	30.6499	31.4032
MA-00072-149	39.4567	24.519	22.8882	22.8753	22.9762	23.3212	23.2216	24.5632	22.553	23.1048	24.6893	24.0719	25.2079	23.9082	25.9357	24.2879	24.2786	22.6696	22.5319
MA-00184-140	39.4445	27.2652	27.1552	27.1586	27.0108	26.2599	26.1838	24.746	25.3901	26.638	24.754	24.3962	26.8699	26.989	24.5196	24.6613	26.4786	24.6085	26.0052
MA-00189-488	39.4006	29.3674	28.6649	28.9055	29.1405	29.0982	28.8978	27.973	27.9745	28.1099	28.0397	27.8909	27.9404	29.7875	30.2422	28.0706	29.5649	29.828	29.1768
MA-00153-35	39.3824	25.8606	25.3054	25.8206	26.6788	25.8133	26.6728	25.786	26.7347	26.405	26.7316	26.2529	26.3707	27.7003	27.0165	27.3316	26.5639	26.1003	25.6074
MA-00073-392	39.373	22.3349	22.5997	23.4335	23.8935	21.8519	24.4032	24.2637	24.3441	25.0216	23.8446	23.2024	24.4491	23.7728	22.9796	23.8105	23.7125	24.0377	23.4214
MA-00073-154	39.2092	25.6277	25.3572	24.8951	24.8609	25.656	25.6449	25.2451	25.5933	25.5875	25.1547	23.3558	23.4215	23.5814	24.1239	25.764	22.5689	24.3667	25.4435
MA-00210-169	39.1933	26.9826	26.2067	25.3128	27.5079	26.8746	27.4559	26.2803	27.5975	26.8965	27.1866	26.8151	26.41	26.3867	26.5336	26.3443	25.3734	25.1032	26.4934
MA-00213-499	39.1457	27.0572	25.2835	26.6016	26.7615	25.6092	27.4321	27.9551	28.1649	28.0114	27.6486	27.7419	28.2614	28.4244	28.2106	28.5653	27.9056	26.4947	27.8891
MA-00297-3	39.1379	25.3198	25.4215	24.7406	26.1233	25.9012	26.3613	26.1739	25.9867	26.2262	25.3018	24.7248	25.2397	25.238	25.5685	25.358	25.0344	24.2127	24.3316
MA-00173-1	39.1106	25.7262	25.1635	24.6979	25.4653	25.7257	23.0466	22.7219	25.4877	22.9219	22.8099	22.3089	25.106	25.3563	25.1092	22.0289	24.3439	22.0824	24.5676
MA-00067-62	39.0458	25.141	24.8024	25.3692	25.863	25.7566	25.8786	26.4912	26.9493	26.4764	26.4369	26.2625	27.2041	26.0257	26.6154	26.4904	25.8019	25.6932	25.8608
MA-00072-343	38.9853	23.4491	25.413	24.8202	25.036	24.9939	26.1879	23.8629	26.4089	24.5694	26.6158	25.7381	25.9587	25.7226	25.2352	26.0639	25.4308	27.0873	26.5678
MA-00028-26	38.902	30.379	30.4883	29.9201	31.9959	31.6221	31.9765	31.4901	32.0348	31.8093	31.9233	31.7771	32.0263	31.8851	31.7114	31.8258	31.2669	31.5295	31.6601
MA-00268-39	38.9009	26.3234	27.561	26.5193	27.7059	27.0148	27.2451	26.0493	25.7711	26.3935	25.5929	24.1176	26.1672	26.5338	27.1118	25.9047	26.5882	25.2484	27.1908
MA-00067-281	38.8687	25.0955	25.6791	23.4041	30.0609	25.631	25.9799	25.6244	26.4274	26.0304	26.2433	26.7804	26.7747	26.9559	27.1508	26.7255	26.3339	27.3424	26.6204
MA-00055-258	38.8583	27.8976	28.401	28.0249	27.85	27.8153	27.6761	26.5621	27.3319	26.7127	26.8952	27.2531	26.5288	26.794	26.8661	28.3707	26.3466	26.1977	27.2193
MA-00120-265	38.733	27.5007	28.0348	27.6883	27.9189	27.6319	27.848	27.7309	27.8165	27.6404	27.8621	27.3502	27.7591	27.2891	27.7473	27.031	26.3696	26.2498	26.206
MA-00184-258	38.722	29.5839	29.734	29.5503	29.7648	29.5836	29.8255	28.2661	29.5542	29.1508	28.2191	29.1731	28.6739	28.8922	28.2985	28.2615	27.719	28.3808	29.3948
MA-00119-19	38.71	26.8112	26.57	26.7007	26.9707	27.3464	28.3647	27.8534	27.2418	27.202	27.3583	27.3844	27.0722	26.8003	27.3749	26.8264	26.2213	25.7252	25.9125
MA-00213-401	38.6206	28.9136	29.1775	29.4051	29.327	29.4577	29.4647	28.2264	28.5727	28.8035	28.3364	28.4281	28.4442	28.3549	28.1643	28.8174	27.165	27.3438	28.2893
MA-00334-119	38.4854	24.157	24.3911	24.8892	25.1757	24.4011	24.6599	25.6534	25.7181	25.2394	25.4433	25.3982	25.7745	25.9762	25.033	25.1526	24.0048	23.2809	24.3263
MA-00189-435	38.4079	23.5695	25.7568	23.8579	24.0043	25.5033	26.1141	22.8087	25.2021	25.6365	26.4159	25.0445	26.5395	27.7425	26.429	26.5424	25.7924	26.5941	26.5078
MA-00101-89	38.3891	26.1283	26.8465	24.5124	27.2089	25.9851	26.4498	25.219	26.8801	26.1983	25.5584	26.455	26.5537	25.3981	25.3687	25.8557	24.1937	24.384	25.7978
MA-00323-86	38.3509	25.8638	27.2131	25.954	25.6412	24.9161	25.9746	24.6486	24.3333	25.4636	24.5541	25.3868	24.5829	25.4094	25.8298	24.8395	26.008	25.4615	25.7735
MA-00090-531	38.3277	24.9046	25.5082	25.9342	26.2151	27.2758	25.7096	23.6923	23.5707	26.3914	26.8819	27.1911	26.6572	26.8073	27.3944	26.655	26.0823	26.2755	27.1148
MA-00073-73	38.3271	24.9573	25.7746	24.4647	25.1548	22.9821	24.746	20.0625	24.2919	24.3264	23.2098	24.226	23.6042	25.2004	23.2158	23.1043	24.4244	23.9552	24.0206
MA-00139-373	38.3047	23.4293	25.1103	24.0178	24.9201	24.1081	24.5516	23.4629	24.2865	21.896	24.5475	24.9393	25.4749	25.5481	25.559	25.3159	24.6605	25.9042	26.5371
MA-00153-285	38.2252	24.7518	22.9894	23.1325	25.6968	23.4713	24.8509	25.6154	24.7806	24.7245	24.3178	25.1628	25.5157	24.1963	24.2564	24.4045	23.7056	23.2103	24.8363
MA-00213-112	38.069	25.799	26.2492	25.5303	25.5763	25.3042	25.8706	24.6742	24.5655	24.2617	24.704	24.286	25.0767	25.3868	25.0374	23.9933	24.4943	23.1641	24.3101
MA-00173-159	37.9382	31.7002	31.729	31.3811	31.5201	31.4105	31.7333	30.6301	30.6619	30.4532	30.1583	30.5822	30.8755	30.8593	30.8686	30.5497	30.2084	30.1442	30.3993
MA-00153-402	37.8044	24.9036	25.2289	24.0811	24.3671	24.8735	25.7116	24.3016	24.1931	25.2172	22.9634	24.2415	22.9032	24.525	23.7913	24.226	23.2676	24.1114	23.5059
MA-00153-263	37.764	27.9619	28.5638	27.4151	28.6316	27.7167	28.6483	27.762	28.0028	28.1585	26.9226	27.3598	27.6841	27.4254	26.9789	27.5972	26.8152	26.9497	26.7042
MA-00222-1	37.7337	31.9019	32.1417	31.8735	32.1776	31.9313	32.3258	31.3781	31.783	31.1063	30.6892	31.0127	31.0349	31.1052	31.0581	31.1256	30.8974	30.7375	31.0491
MA-00334-478	37.709	25.8534	26.087	25.9246	27.3533	26.9774	27.2449	27.1754	27.465	27.4956	27.304	27.4709	27.5797	27.9537	26.7913	27.7992	27.2058	27.3852	27.449
MA-00270-17	37.5926	26.7961	26.8673	26.745	26.8948	27.2263	26.5215	25.8677	25.6068	25.376	26.6473	26.5487	26.3564	27.3254	26.3186	26.5662	27.1813	27.5872	27.4936
MA-00111-14	37.5898	24.9659	24.3008	25.2056	23.4076	24.5339	24.7069	25.2753	25.4513	24.2857	26.0602	25.3754	26.1222	24.6452	25.706	26.1287	22.4692	25.5305	25.2142
MA-00297-349	37.5268	24.3739	26.4039	26.5616	25.8336	25.6324	26.5489	25.1475	26.6948	24.7501	25.2183	24.6718	25.9544	24.9627	24.5996	25.1193	24.1421	22.8188	25.2772
MA-00090-220	37.5201	23.7292	23.2386	24.9405	25.6958	24.392	25.0867	25.1731	24.7124	24.776	23.2558	22.788	25.7701	25.6393	26.0475	24.2917	23.1287	23.1402	23.6148
MA-00073-374	37.4904	24.6348	25.2226	24.7176	25.2803	25.2893	24.8776	23.8805	23.9923	24.2825	24.9768	25.1629	25.085	25.9282	25.5677	24.3938	25.6248	25.5124	26.2045
MA-00268-169	37.4614	30.8255	30.9997	30.4368	30.4188	30.4433	30.7533	29.3087	29.8165	29.886	29.571	29.2978	29.8403	29.6044	29.6887	29.6021	29.0322	29.6621	29.4615
MA-00120-530	37.4553	27.8398	27.9369	27.8535	28.7223	28.4442	28.7905	28.7004	28.9135	29.0136	28.9666	29.1538	29.3335	29.3424	29.146	29.2681	29.1427	29.5061	29.5341
MA-00153-436	37.3995	24.2777	24.8755	23.6625	24.3962	23.9491	24.9072	19.6361	23.5976	25.1432	24.8389	20.4367	23.3217	24.8979	24.2605	24.3067	22.8986	23.9654	23.4745
MA-00334-102	37.3966	26.2945	26.3569	25.2088	25.9343	26.4918	26.4137	25.9961	25.985	25.7903	25.3566	25.6317	25.8034	24.9664	25.3803	25.4305	22.7418	24.9972	24.1641
MA-00182-368	37.3553	25.5936	23.8197	24.9695	25.4719	26.1926	27.129	25.0797	25.449	25.1993	26.2791	24.1926	25.316	25.0038	24.2599	24.2541	24.6499	23.5175	24.3503
MA-00334-387	37.2905	29.5995	29.2574	29.6485	29.6586	29.2606	29.968	28.7208	29.4523	29.0074	28.3682	27.2275	28.8904	27.74	28.999	28.6366	28.8554	28.3635	29.4641
MA-00139-237	37.2717	30.2185	30.5301	30.1203	30.62	30.281	30.7893	29.0811	29.3599	29.2725	29.0226	29.5239	29.385	29.53	29.3255	29.3975	29.3557	29.8848	30.0208
MA-00101-620	37.2599	34.8746	34.5296	34.9374	35.2514	35.0872	35.1185	35.9996	36.5383	36.1049	36.1791	36.4004	36.0713	36.3286	36.1956	35.9308	35.3988	34.9374	35.9352
MA-00213-95	37.2514	25.9249	25.866	26.5153	23.5479	25.3215	26.4814	24.9044	24.3198	25.2018	25.7782	24.6195	25.5464	25.1433	24.8038	25.281	24.4985	24.1371	24.4546
MA-00184-124	37.2222	25.5686	26.7886	26.0519	27.867	27.2836	27.6141	26.7749	26.5152	27.0443	25.5736	27.4272	27.0496	26.6301	25.7371	26.6713	26.2934	26.1124	25.6768
MA-00326-2	37.181	26.5819	25.4938	25.2696	27.1662	25.7955	27.1954	24.3483	27.0828	27.7537	23.1177	27.9299	27.2398	27.1848	27.3864	27.2064	26.4823	27.2466	27.2659
MA-00297-249	37.146	26.8457	26.5635	26.1306	25.9623	26.4865	26.2607	27.3451	27.314	27.2437	28.6153	27.9033	27.357	27.6308	28.1584	26.6748	25.2475	26.4306	27.0432
MA-00173-23	37.0241	27.1533	27.0859	27.9232	26.9915	26.4726	27.3404	27.6728	27.5541	27.8741	28.1595	27.651	28.0831	27.808	27.149	27.9919	26.3418	25.6531	26.7621
MA-00326-68	36.9516	26.4716	26.9072	26.0996	28.0084	27.03	27.3506	25.3407	23.8577	26.366	25.2639	25.5541	26.4486	28.1318	28.9285	25.3348	27.0127	27.2296	25.7223
MA-00101-591	36.8873	24.7266	24.1375	24.3736	25.8549	24.2496	25.1778	24.9001	24.1401	23.5663	22.6893	23.9516	24.1558	24.8358	25.1802	25.0231	24.6671	24.9506	25.9042
MA-00182-162	36.8765	28.7852	29.0829	28.6376	29.0121	28.4528	28.9721	27.501	28.0852	27.9018	27.526	27.4337	27.6949	27.8129	27.8965	27.7959	27.7966	28.1601	27.8544
MA-00101-254	36.8625	27.3081	27.5983	27.1429	28.0432	27.6073	28.0544	28.2309	28.9827	28.6941	28.488	28.521	28.4073	28.7885	28.6624	28.6705	27.6374	27.8469	28.2164
MA-00048-3	36.8251	26.5909	27.1815	26.3093	26.0934	27.1593	25.2521	24.6011	25.8863	27.0275	24.3011	23.1753	24.8246	26.8416	24.1999	24.2924	24.9331	24.1456	25.1061
MA-00173-130	36.819	27.3476	26.3598	26.7227	27.1357	25.7085	26.6972	26.1214	25.8943	26.0929	26.2249	25.6642	26.7987	26.1647	23.7228	26.1215	25.4364	23.1672	25.4
MA-00184-324	36.7486	27.0104	26.9785	26.0788	26.9249	26.9384	27.012	25.9748	25.3972	26.0687	25.7884	25.7772	26.1536	25.5642	26.3458	25.6982	25.4478	24.857	25.7006
MA-00326-98	36.735	23.3511	21.6059	19.8382	23.8229	23.1825	23.2035	21.6097	23.1569	22.5167	22.5928	22.4304	22.4551	22.9505	22.4206	23.2214	23.9648	23.6306	21.5075
MA-00334-247	36.7201	30.2477	30.4587	30.076	30.2794	29.8399	30.154	28.8791	29.2717	29.325	29.1792	29.1361	29.4402	28.9508	29.1049	28.6843	28.9567	29.4134	29.6986
MA-00297-447	36.6393	25.5595	26.2427	25.1826	26.4197	24.5366	25.3704	24.362	23.7892	24.3372	24.8312	26.4479	25.9938	25.4825	25.7866	24.2645	24.3099	25.8794	26.6959
MA-00210-294	36.6392	25.4039	25.8566	24.9088	25.3707	25.5028	24.5784	23.9711	24	24.1674	24.0439	24.0742	23.7758	23.5081	23.872	23.9061	24.0384	24.6044	23.9245
MA-00153-720	36.5547	25.934	25.2265	25.3303	27.5921	26.1513	27.178	26.7635	27.2074	26.946	26.483	28.041	27.5591	26.8306	27.4121	27.1786	26.7486	27.2244	27.2233
MA-00173-218	36.5081	27.0536	27.9648	26.3012	27.6103	25.6189	25.3513	25.8819	24.6847	26.6099	26.0422	25.1868	26.2071	26.7212	26.5479	27.7751	27.3359	27.3095	27.7798
MA-00120-247	36.4039	26.4685	27.0022	26.3067	24.1638	24.0872	26.9509	26.0396	25.6111	26.2808	26.8195	23.8452	23.7765	24.9207	23.2561	24.7083	24.4527	22.5284	24.4129
MA-00118-5	36.3994	29.8683	30.2072	29.6801	30.19	29.4437	30.2422	28.582	28.8116	28.0968	28.6549	29.0723	29.2328	29.1451	29.3252	28.7574	28.6437	28.9397	29.1319
MA-00072-205	36.3872	29.7382	30.0107	29.4251	30.8891	30.1998	30.3882	30.5761	31.0669	30.7906	30.9012	31.1705	30.9668	31.3577	31.3092	31.0352	30.9601	30.9484	31.3303
MA-00213-584	36.3619	25.9213	25.8069	25.9941	24.4423	24.8113	25.9994	24.727	24.3784	24.867	25.6493	24.2029	24.9357	25.4186	24.8645	24.9605	23.525	22.748	24.7434
MA-00073-63	36.2487	26.9366	26.3824	26.1658	27.4647	27.319	27.0502	27.5475	27.6234	27.9574	27.9923	27.9891	27.973	28.1701	28.2828	28.0609	27.897	28.1581	29.9156
MA-00101-310	36.2234	23.929	22.798	21.5567	23.2517	23.1855	23.7817	23.2798	22.8338	23.5271	23.5012	22.9857	23.2967	26.6966	22.9035	24.0914	22.4571	21.8122	21.8768
MA-00139-351	35.9826	25.1578	26.6255	25.9219	25.4394	23.329	25.077	25.4701	25.5714	25.987	26.2399	25.5838	27.0776	24.6099	26.0265	25.5032	26.7571	26.4158	24.6917
MA-00184-159	35.9778	26.7376	25.5982	25.8195	26.6033	26.9594	26.4619	21.5117	26.791	22.209	21.441	26.4473	21.8317	27.3158	25.8493	27.762	25.0225	25.0779	27.6134
MA-00101-344	35.9266	23.4472	22.2818	20.5922	23.0055	21.1143	22.3433	22.2629	23.0751	24.5319	23.125	24.4681	23.3429	23.969	22.3353	22.8968	21.0028	20.6193	24.2178
MA-00189-116	35.8543	25.7151	23.9246	25.1705	26.7321	25.7929	25.8011	25.395	23.9131	25.7686	25.9404	25.2729	26.1859	24.4458	24.4993	24.6804	25.0658	25.1328	25.2718
MA-00141-1	35.8514	25.0445	24.2924	24.4476	26.075	25.6014	25.335	24.3231	24.3592	24.0259	24.3354	24.6467	25.1542	25.3071	25.956	24.4347	24.7073	25.4309	26.352
MA-00055-205	35.7685	28.0023	26.8748	22.9806	25.5224	25.4017	25.5205	26.8274	24.8512	26.7371	27.0133	25.2035	25.5332	25.8562	25.2819	25.9561	23.7789	24.1779	23.7246
MA-00090-542	35.7147	26.1903	26.283	26.1529	26.7598	25.3731	26.5565	26.7703	26.1319	26.7336	27.6246	27.2084	26.9777	27.3875	27.4129	27.3441	27.1889	27.0196	27.7507
MA-00101-542	35.7024	27.4637	27.7104	27.0858	28.5649	28.2942	28.78	28.4976	28.6759	28.6437	29.0397	28.8418	28.8948	28.7898	28.9175	28.8996	28.8362	29.0859	29.2576
MA-00055-147	35.6909	24.2128	25.0563	23.0942	25.0186	24.4882	24.6636	24.3636	24.2455	24.1919	23.6354	22.7312	25.5785	23.8954	23.0328	23.4446	22.2091	22.3775	24.3928
MA-00101-358	35.5895	23.5947	23.0026	22.5869	23.5436	22.8809	23.1672	24.0861	22.8211	23.9863	23.1594	22.7217	23.7634	24.4492	24.421	23.9947	24.232	23.3753	25.2333
MA-00073-559	35.5349	28.5993	28.8434	28.5649	28.6785	27.6487	28.4721	27.5908	27.3191	27.3973	27.1727	27.1924	27.4667	28.1103	28.7163	27.1091	27.1947	27.0465	27.8197
MA-00092-2	35.5094	25.9638	26.6157	25.8946	26.6542	26.3058	26.558	25.439	26.3632	26.4608	26.6044	26.8758	26.4514	26.6171	25.9317	26.7429	25.4712	24.7672	23.4789
MA-00101-37	35.4955	26.8446	27.0047	26.2406	25.4691	27.1498	27.3945	25.6855	26.214	26.4656	26.4082	25.7889	25.1079	25.6354	25.319	26.0638	24.4162	25.4232	25.7445
MA-00184-333	35.3401	23.6403	23.8503	23.4591	24.6306	24.5445	24.3459	24.4092	25.7804	23.6779	25.4772	25.5368	24.0678	24.2518	25.5331	25.4794	22.6057	24.0734	25.3138
MA-00072-90	35.3223	32.2768	32.5328	32.0403	32.4162	32.0255	32.2637	31.3262	31.7088	31.5334	31.1046	31.3312	31.1964	31.3515	31.1592	30.8557	31.1897	31.1885	31.5691
MA-00073-376	35.2126	24.0799	24.8488	23.4473	24.4217	24.4432	25.6936	23.8656	26.3699	24.4056	24.6238	23.5966	25.3842	25.4897	25.6552	25.7436	24.8968	25.553	25.7518
MA-00153-270	35.1521	31.8751	31.6212	31.7137	32.3568	31.6756	32.236	32.387	32.6423	32.5631	33.0397	32.7148	33.0779	33.1688	33.0883	33.109	32.6296	32.3403	32.9527
MA-00112-246	35.1153	34.9848	34.972	34.5978	34.9763	34.5296	34.7504	33.5527	34.0266	33.7553	33.6522	33.6629	33.6839	33.8974	33.6839	33.6088	33.4943	33.8138	34.043
MA-00182-1	35.0741	25.4947	22.7924	22.7713	23.317	23.495	22.1582	23.5845	23.9065	22.7015	23.5767	24.026	24.6564	24.2249	24.8999	24.1923	22.8273	22.8196	23.5793
MA-00090-396	35.0062	26.2739	26.9357	26.5894	26.814	27.1886	27.1571	26.8192	27.2117	27.1165	27.0841	26.9045	26.7585	26.7489	26.4511	26.4823	24.8948	25.6419	25.8962
MA-00326-160	34.9979	30.4853	30.6623	30.0405	30.7199	30.7028	30.9464	30.1791	30.655	30.6788	30.7698	31.0882	30.7971	30.9806	30.7874	31.1447	29.2483	29.4989	29.5866
MA-00184-265	34.9646	30.5139	30.8399	30.3038	31.1036	30.7215	30.8359	31.5831	31.6278	31.5594	31.0506	31.4898	31.5725	31.1542	30.9237	31.1021	30.071	29.93	30.3497
MA-00268-98	34.9499	26.6162	25.8597	25.9734	26.167	24.639	24.1041	26.3195	26.8091	26.2385	25.3445	26.6498	25.3257	25.5766	26.3346	25.6601	24.8873	23.8542	25.4344
MA-00090-192	34.9256	24.844	25.8374	23.7616	24.4401	24.8935	24.1867	26.2186	25.6538	26.3083	26.7384	24.1582	24.1253	26.5726	24.2647	25.7135	23.5629	24.7818	23.7951
MA-00184-516	34.9224	27.6827	27.6976	27.0465	27.251	26.7334	27.5534	26.1402	26.6668	25.8976	26.2943	26.2118	27.2495	26.1034	26.4684	25.5071	27.2424	26.243	26.5757
MA-00182-43	34.8859	26.0564	26.1601	25.2702	26.4023	25.9118	26.2671	24.9435	25.9413	25.6024	24.7157	25.0376	25.2032	25.5025	25.8338	24.1391	24.5709	24.6519	25.0206
MA-00153-465	34.8576	30.0674	30.184	29.957	29.9407	30.2535	30.2711	28.829	29.3468	29.5254	28.8675	28.8345	28.6454	29.173	29.4987	29.5912	29.0868	29.477	29.554
MA-00162-12	34.8438	28.5281	28.6054	28.2846	29.4705	29.4172	28.8467	29.8376	30.088	29.9107	29.8463	29.8505	30.105	29.7224	29.7641	29.7042	29.544	29.6392	30.0219
MA-00112-313	34.749	24.7713	24.5698	24.0823	24.2719	21.698	23.9631	23.3414	23.1392	23.9682	23.4316	23.5205	21.4654	23.7831	24.453	24.1297	23.8871	24.2049	23.8732
MA-00067-336	34.7243	28.2808	28.17	27.2445	27.7847	27.8866	27.4052	27.101	26.7571	26.2999	26.5463	26.2577	27.0213	26.3545	27.0208	26.3154	26.4901	25.9162	27.6857
MA-00073-180	34.6729	25.6782	25.7094	25.403	24.7781	25.2887	25.8608	24.6012	25.0808	25.5507	24.3162	24.3635	24.3621	24.6318	25.1607	23.8378	24.0266	24.4325	23.4446
MA-00153-159	34.6123	28.2473	28.4766	27.9464	27.7572	27.8378	27.9688	28.6015	28.7776	28.4689	28.9483	28.9572	29.3966	29.1601	29.0903	29.0462	28.9246	29.0341	29.1193
MA-00101-545	34.5772	25.3194	24.9003	23.9131	26.3977	24.7673	24.5638	25.9235	26.4555	26.8374	26.2869	27.1498	26.4006	26.4381	26.6039	26.705	25.5903	25.9543	26.422
MA-00120-540	34.5066	26.2462	26.5482	25.2245	25.7771	26.1707	26.417	25.2735	25.8698	24.8263	24.9635	24.8499	24.8273	24.9676	25.7146	24.8769	25.2241	24.6812	24.8082
MA-00120-261	34.4718	34.5754	34.7849	34.0101	35.0142	34.3033	34.7946	33.5062	33.8422	33.87	33.5062	33.4702	33.3033	33.6198	33.4702	33.6944	33.3303	33.3956	33.5412
MA-00120-20	34.4576	22.2774	24.5773	23.2608	25.013	23.612	24.0506	23.0652	24.2668	23.4282	23.078	23.3456	20.0232	24.5346	24.0293	23.5526	24.4073	25.1463	23.6339
MA-00297-457	34.4147	24.978	25.795	25.4007	26.3177	26.3936	24.278	26.0214	27.014	26.0229	25.8264	25.5765	27.0309	26.7317	27.1503	26.334	26.322	26.5268	26.8419
MA-00334-63	34.2979	26.6377	25.2333	25.5017	26.2725	26.7397	25.621	27.241	27.2255	27.5599	27.3379	27.3666	27.2922	27.427	27.64	27.3581	26.8523	27.0925	26.8963
MA-00210-14	34.2242	26.6075	26.8065	25.463	26.8474	26.765	26.0639	25.0341	25.8868	25.9441	25.6352	26.0681	27.0913	25.1428	25.9035	25.085	25.3466	24.8873	25.6615
MA-00320-213	34.1858	25.7006	24.6993	24.0732	25.6275	23.5392	25.6601	25.4701	26.2268	24.1234	26.3622	23.9653	27.6415	26.097	26.0072	26.7261	27.1192	24.8688	27.8332
MA-00073-92	34.1428	29.1095	29.6275	28.9825	29.1457	28.879	29.1642	27.642	27.8115	27.8646	28.0259	27.8298	28.3871	28.8224	28.7626	28.5373	28.1347	28.3261	28.8776
MA-00182-352	34.1358	27.2243	27.7533	27.0067	27.0611	27.3952	27.2123	25.6125	26.4771	26.2326	26.056	26.5884	26.0054	26.5527	26.2789	26.2184	26.0575	27.681	26.2488
MA-00153-507	34.1315	25.9533	26.9027	26.7507	27.2814	26.9382	26.8356	26.6214	26.4354	26.5898	25.4133	26.2266	24.7712	26.5362	25.3046	26.1307	25.4873	26.4759	25.3206
MA-00112-222	34.1028	28.1554	28.5591	27.7921	30.8682	25.7389	25.9847	26.4226	26.6893	27.0197	26.8127	26.4568	26.4771	23.6738	23.3928	26.3454	26.9041	27.3787	27.0544
MA-00073-665	34.1006	22.6159	24.4855	24.7691	26.1515	22.1912	22.7209	24.0162	24.5433	24.7274	23.567	20.9087	24.4668	21.5262	24.814	26.0494	25.4511	25.5599	25.431
MA-00162-194	34.0947	26.5316	26.7819	26.139	27.4536	26.8474	27.339	27.1556	25.8381	26.6851	26.0933	27.585	26.1528	27.1261	25.7865	26.5553	24.999	26.0993	25.2162
MA-00120-280	34.0653	32.0961	32.2336	32.0035	32.2994	31.6186	32.379	30.9953	31.2191	31.1575	31.2757	31.1424	31.2026	31.3984	31.3277	31.2376	30.7738	30.6376	31.0049
MA-00268-29	34.0536	29.4671	29.5277	29.2907	28.5368	28.8835	28.9665	28.3968	28.1501	28.5632	28.3652	28.4045	28.1858	28.7288	28.2457	27.5949	27.5519	28.1709	28.1406
MA-00101-245	34.047	27.3022	27.0434	27.3277	27.6838	27.4863	27.7802	26.9234	27.001	26.6096	26.7912	26.3159	26.6103	26.2133	25.9266	26.405	27.2904	26.7964	26.7836
MA-00190-8	34.0365	30.4716	30.8235	30.0733	30.381	29.7821	30.3613	28.662	28.7642	29.1	29.4733	29.5139	29.4757	30.1361	29.8707	29.6258	29.6198	30.0293	30.0737
MA-00213-242	33.93	25.9834	26.9198	25.4396	26.8975	26.0587	26.1839	25.225	23.7831	25.2843	26.0828	25.624	24.9266	25.5356	25.8559	25.2825	25.355	24.8883	24.8181
MA-00101-135	33.9219	24.2067	24.418	23.9136	24.7326	23.6741	24.4324	22.0755	22.3734	22.9499	23.3985	23.3254	23.4492	23.1453	23.2221	23.842	22.3499	22.8338	23.1323
MA-00213-332	33.8888	26.1549	25.9328	24.458	26.6953	26.5959	26.0305	26.1576	26.6454	25.4004	27.1636	27.5728	27.3463	28.0824	27.2651	27.3665	27.1821	27.6442	27.8525
MA-00213-652	33.7741	21.9598	23.4628	22.3761	23.3003	23.6432	23.9386	24.1585	22.8409	22.3638	22.3761	22.8093	22.8319	23.6159	24.7153	22.9527	21.8776	21.1702	23.1085
MA-00297-213	33.7471	29.6017	29.4536	28.6524	30.7051	30.4673	30.5304	29.0416	29.2622	28.8881	29.262	29.8202	29.5302	29.616	29.1783	29.5444	30.0421	30.0654	30.4275
MA-00023-18	33.6739	23.9996	23.9487	23.3027	24.6387	23.4054	23.6076	22.5535	22.9055	23.3527	24.4442	23.6159	23.1884	23.7792	23.7255	22.0709	24.143	21.5108	21.9485
MA-00182-128	33.668	26.8682	27.2635	26.359	27.0158	26.8237	26.5325	26.4653	26.7821	26.4451	25.7183	25.724	26.5293	26.0372	26.0713	25.9761	25.5571	25.2717	25.1865
MA-00072-153	33.6579	25.4641	26.0297	26.1152	26.4414	22.6905	25.9495	25.453	26.188	25.9866	25.684	25.7654	25.9888	23.6377	25.8224	24.2702	25.7353	25.1155	23.4322
MA-00153-275	33.6187	22.4594	22.1585	21.5802	21.7633	22.622	22.4476	20.7406	21.4487	21.149	21.9286	23.7095	22.2587	23.5959	22.2827	22.0364	22.3655	21.9357	21.9435
MA-00112-155	33.6122	24.608	23.5822	23.6629	23.7926	22.2233	23.6303	23.4761	23.0791	23.5576	23.5431	22.686	23.1891	23.6317	24.28	22.9239	24.3514	24.3504	25.6764
MA-00162-41	33.5809	27.4538	26.9688	26.5052	27.7158	28.1563	27.8415	27.8532	27.8643	28.3474	27.9802	28.3804	28.1836	28.856	28.353	28.0128	28.297	28.5414	28.9722
MA-00154-3	33.5713	28.0547	27.9696	27.7025	27.6346	27.7261	27.7312	26.4985	26.8813	26.7689	26.6283	26.4901	26.8923	26.8098	26.6377	26.9168	26.3578	26.8058	26.9817
MA-00101-462	33.4814	28.969	28.5395	28.7361	28.9244	28.4201	28.9413	27.6212	27.1567	27.1116	28.04	28.0038	27.9696	28.3516	28.4692	28.2834	28.0253	28.0712	28.6265
MA-00270-83	33.45	26.0063	25.7234	26.2619	26.8243	25.0275	26.0364	26.8087	25.8268	26.6473	25.2837	25.8777	25.6766	26.2602	24.5342	25.0846	25.2236	24.021	25.7199
MA-00297-443	33.4265	24.0588	25.2307	25.5016	26.1014	26.0885	26.6647	26.2291	25.8717	26.5411	26.5733	26.9232	26.4516	26.9515	27.1855	26.4693	26.7457	26.7744	27.2243
MA-00240-1	33.4178	28.8726	29.1319	28.6054	28.3919	28.3027	28.9487	28.4768	28.4458	28.2236	28.0364	28.2125	26.6925	27.0935	28.1656	27.7357	27.2112	27.715	27.3419
MA-00120-146	33.4133	25.8023	25.396	24.4691	25.8315	25.7184	24.6963	22.3487	21.85	24.3335	20.8217	24.0296	24.0145	22.9243	22.2264	23.5046	25.6708	24.2918	24.7599
MA-00073-688	33.4078	25.0788	25.3357	24.3853	25.113	26.5774	26.9216	26.6939	26.3163	25.7375	26.1118	26.6946	26.1277	26.2135	26.1086	26.535	25.4065	25.7353	25.6912
MA-00120-428	33.3998	28.7764	29.5297	29.1	28.9693	28.8659	29.4231	28.3068	28.4783	28.1756	28.3562	28.6794	28.615	28.0767	28.133	28.3598	26.8055	27.4945	28.5345
MA-00162-362	33.3268	27.5433	28.0625	27.3772	28.0291	28.1481	28.2552	26.676	27.4001	26.8234	26.8508	26.6887	26.5265	27.9102	28.0379	26.7867	27.4755	27.4543	27.6372
MA-00162-273	33.3004	28.3054	28.1037	27.427	28.1015	28.4319	28.4205	27.4859	28.0243	27.7063	27.2697	26.6471	27.658	27.6315	27.9586	27.4527	26.6053	26.868	26.8193
MA-00090-527	33.2806	26.3644	25.8638	24.7707	25.9732	26.1491	26.3564	25.7497	26.2308	26.938	26.823	27.0884	27.2225	27.2744	26.8674	26.8301	26.5238	25.1822	27.1874
MA-00120-580	33.2607	27.9319	27.2788	26.6047	27.9198	26.1364	27.1946	26.5797	27.5204	26.4624	27.2557	27.4356	27.2175	27.1786	26.8746	25.8285	25.642	25.2826	26.2946
MA-00182-49	33.2506	27.5992	23.5392	27.1804	23.2235	23.2881	23.7653	24.546	23.7314	23.37	23.672	23.3229	23.6684	23.0758	24.686	24.0846	23.012	24.4036	23.7185
MA-00153-111	33.2342	23.0473	23.2488	19.8831	21.9704	23.8732	23.8707	20.7112	23.4793	23.7104	23.3931	23.9743	22.6672	23.2065	24.1084	23.8342	21.7261	22.9539	22.9891
MA-00090-310	33.2078	25.4116	25.9265	25.7605	25.0038	25.498	25.2516	24.1687	24.0051	23.8367	25.0285	23.8885	25.5902	24.6944	23.4599	24.6398	24.8021	25.9478	24.9964
MA-00297-533	33.1977	30.7285	30.6864	30.785	30.9143	30.3054	31.0173	30.1912	30.6642	30.5141	30.3235	30.1613	29.8692	30.2759	29.5458	29.5026	29.3264	29.1831	29.9738
MA-00142-1	33.1858	27.7833	27.8664	27.2243	28.3389	28.1499	28.4191	28.025	28.9873	28.5179	28.6144	29.031	28.943	29.2909	29.2053	28.7715	28.4336	28.1238	28.9446
MA-00182-223	33.121	29.8269	30.0162	30.1079	30.4134	29.5039	29.8592	28.9127	28.9169	28.7362	29.3357	29.0327	29.7921	30.2518	30.1109	28.9974	30.1477	30.6699	30.3117
MA-00189-115	33.0613	28.2768	28.668	28.5825	28.7212	28.7239	28.8932	28.2115	28.3403	28.0979	27.7174	27.6743	27.9842	27.8501	27.7681	27.8577	26.5496	27.3125	27.7842
MA-00213-438	33.0545	27.9647	28.2831	27.9802	27.3776	27.9364	28.4215	27.0201	27.402	26.8618	26.3368	27.1999	26.7475	27.2504	27.0577	25.2336	26.3963	27.3012	27.0811
MA-00090-23	33.0474	31.6258	31.7836	31.6127	31.9585	31.6793	31.8653	30.4887	30.9539	31.0095	30.7891	30.8439	30.7787	30.8344	31.1041	30.6565	30.8081	30.4489	30.6
MA-00213-659	33.0329	27.8666	28.1707	27.9515	28.4156	27.4033	27.8474	26.5904	24.2246	26.3394	26.5825	26.3271	28.0357	27.9241	27.8244	27.595	27.4871	27.7844	28.9101
MA-00210-118	33.0145	26.0709	26.6216	26.566	26.6292	26.575	27.2711	27.6489	27.7166	26.9533	27.6617	27.7655	28.1902	27.4225	27.6026	26.8385	26.2075	27.2632	26.3579
MA-00213-399	32.9891	24.5786	24.6827	24.3257	25.4632	24.5825	24.4205	24.2857	24.9887	24.8445	24.2193	23.7315	24.4652	24.5512	24.015	24.0293	25.7446	25.1318	26.1733
MA-00182-115	32.9326	30.0001	30.3532	29.7543	30.3717	30.0186	30.7124	29.2302	29.4828	29.8679	29.2209	29.5542	29.7776	29.7195	29.2031	29.2429	28.9307	28.9487	28.0522
MA-00139-165	32.9301	29.5095	29.002	28.9909	28.9707	28.6486	28.8118	27.7131	27.7799	27.9103	28.1837	27.8272	27.906	28.1951	28.3988	27.9274	28.2244	27.454	28.3223
MA-00213-327	32.9267	26.8192	26.3726	26.9207	27.2635	26.9488	27.0232	26.2672	26.7349	26.4536	25.621	25.9626	26.228	26.3218	25.341	26.8569	24.7248	24.1863	25.8673
MA-00073-247	32.9114	23.7757	24.1972	24.383	24.2837	23.7081	24.1513	23.1204	22.1458	23.3164	23.1595	23.0894	20.9317	23.4047	23.6487	23.3831	22.884	23.9574	23.3665
MA-00190-59	32.8969	23.4083	23.9913	23.5205	24.0482	24.3684	24.3063	24.1193	24.6898	24.4974	24.734	22.8305	24.8145	25.1538	25.02	25.2887	24.1116	24.8666	24.6222
MA-00153-374	32.879	28.5914	28.5064	28.1181	28.7632	28.219	28.7495	27.4852	27.8309	27.0819	27.2618	27.4093	27.3738	28.2067	26.7438	27.9493	27.9479	27.4334	28.0564
MA-00213-196	32.805	29.001	29.1238	28.3365	28.7676	29.1428	29.4364	28.6353	28.8782	28.8304	27.5646	27.865	28.2184	27.9796	28.0505	28.6667	27.6889	27.1246	28.0452
MA-00184-459	32.7352	29.119	29.1026	28.5373	29.1878	28.9752	28.9839	27.7512	28.5429	28.6601	27.9252	28.0799	27.7293	28.663	28.0524	27.2779	27.6939	28.0265	28.3005
MA-00120-21	32.5194	22.2683	22.862	23.0137	22.7721	22.0798	22.7724	23.6737	23.6186	23.4754	23.9988	22.9399	23.836	22.7622	23.9953	24.4748	23.9084	23.8762	22.1264
MA-00073-86	32.5122	29.582	29.7904	29.2231	30.4471	29.7505	30.2333	30.9317	31.0315	30.3861	30.7507	30.7683	31.3151	30.1827	30.3963	30.4803	30.8798	30.9589	30.8782
MA-00073-524	32.318	25.4963	25.6342	25.0248	24.9324	25.0829	25.6102	24.2528	24.8604	24.739	23.79	24.4338	23.803	24.5362	24.4183	24.222	24.9989	24.9176	24.0272
MA-00070-2	32.306	22.2332	23.6716	24.0009	23.5684	24.628	22.6718	24.0863	22.7866	22.6387	24.4631	23.6443	22.5707	22.8	23.42	22.6494	24.435	24.4768	24.8039
MA-00090-442	32.2889	22.5561	23.16	22.2496	23.834	23.9016	24.258	22.2655	22.8889	22.3117	22.8092	22.5453	22.6114	22.7111	22.5551	22.6903	22.7998	22.7691	22.887
MA-00162-262	32.2645	31.1836	31.3491	30.6912	31.1695	30.8328	30.9985	29.8076	30.4931	30.303	29.9563	30.0104	30.0483	30.1802	30.192	29.8728	29.7022	29.7045	30.0168
MA-00139-201	32.2411	29.9011	29.9978	28.9585	29.245	29.6054	29.4155	28.3873	28.6278	28.508	28.5284	28.0745	28.5532	28.5353	28.5529	28.2527	28.1708	27.9004	28.3156
MA-00182-252	32.2162	27.6527	28.6015	27.8588	28.2495	27.9064	28.3143	27.4384	27.4956	27.519	27.408	27.3715	26.9599	27.3917	27.2442	27.109	26.5145	26.4413	27.3286
MA-00101-142	32.1642	22.9582	25.032	24.6741	25.3504	24.8523	24.54	21.2326	22.5772	23.6929	22.661	23.2699	24.614	26.0073	24.3863	24.3487	24.6115	24.2197	24.8918
MA-00320-179	32.1319	24.4967	24.9878	24.3833	24.46	22.9628	24.4729	23.0284	24.3171	23.8244	25.0134	24.8291	24.8111	25.5146	25.3747	23.7402	24.9141	24.5614	25.546
MA-00184-456	32.1081	25.0943	26.8804	26.3544	25.7507	26.324	26.7196	24.833	26.0768	25.9933	24.832	23.9905	25.1785	24.7055	25.9969	24.3379	24.4771	25.211	24.3253
MA-00101-406	32.0475	24.229	24.8833	24.8635	24.7683	24.7313	23.9465	23.9201	24.5765	24.5407	24.6434	25.9193	25.0474	26.3042	26.0395	24.8639	24.7591	24.5404	25.9376
MA-00101-592	32.0196	25.5085	25.0922	24.4479	26.3339	25.89	25.4262	23.6722	25.3845	25.1933	24.129	24.988	23.9618	24.624	24.3477	24.5773	24.2985	24.544	24.985
MA-00189-507	32.0043	30.2739	30.2842	30.0697	30.9979	30.1992	30.7459	30.8602	31.2301	30.7453	31.2463	31.4186	31.4222	31.6114	31.3776	31.4179	31.3888	31.2521	31.9019
MA-00297-406	31.9836	23.0063	23.2845	21.9159	22.8397	25.3736	23.2135	22.7101	23.314	23.5502	23.2477	23.9223	23.6146	24.5465	24.6286	23.4717	22.9578	23.457	23.526
MA-00297-74	31.8873	32.0025	32.3105	31.7333	31.928	31.4989	31.8571	30.6544	30.7818	30.9887	30.8606	31.1483	30.874	31.1595	30.979	30.7555	30.6347	30.8698	31.1551
MA-00326-40	31.8205	27.7024	27.8494	27.8251	27.1405	27.164	27.0756	24.5298	26.7345	26.844	27.0998	25.9905	27.1428	27.9808	27.9426	26.8615	26.3272	25.8135	26.461
MA-00090-236	31.8146	32.1607	32.3812	31.8636	32.4018	31.8632	32.2636	31.0737	31.3914	31.4334	31.3088	31.3109	31.36	31.1841	31.0861	31.0894	30.735	30.7859	31.2073
MA-00323-98	31.7229	29.2894	29.6684	29.2379	30.0625	29.922	30.2464	30.3449	30.639	30.5046	30.7159	30.8359	30.6925	31.0017	30.5203	30.7956	30.1211	30.2648	30.6388
MA-00073-538	31.7119	32.0304	31.9431	31.3667	31.8233	31.7306	32.2676	30.8321	31.0564	31.2364	30.982	30.8966	31.0717	31.1024	31.0544	30.7391	30.6842	30.3323	31.0495
MA-00162-153	31.6128	25.7105	25.459	25.2846	26.1509	26.3946	27.0522	26.9796	25.6348	26.2923	26.5555	26.3285	26.6764	27.032	27.0787	27.0554	26.7013	25.374	26.0547
MA-00326-129	31.5801	24.3486	24.2518	23.7714	23.4966	24.3367	24.7381	24.6425	24.4969	25.5783	25.7284	24.8337	25.1002	25.2543	25.0898	23.9462	20.6755	23.2905	22.5326
MA-00073-541	31.5626	23.0552	22.314	22.7004	25.6856	22.3346	21.3266	21.2786	22.7211	22.8221	22.3913	22.8398	22.2386	22.6472	24.1685	23.5166	23.9372	22.6262	24.5159
MA-00090-320	31.5585	30.7466	30.7692	30.4733	30.7296	30.4136	31.1052	30.5552	31.1215	30.9638	30.6252	30.9359	30.5065	30.8128	30.5497	30.3515	29.5281	28.9687	29.405
MA-00055-80	31.5455	25.1512	24.8778	22.0758	24.8665	24.8722	23.0621	25.3057	25.5971	24.7774	24.2043	23.9989	25.9625	25.4194	23.8135	23.895	23.2539	23.9237	24.0422
MA-00067-165	31.5121	25.0475	24.7908	25.3545	25.6897	25.3376	25.1493	22.6509	24.3664	22.9228	24.0408	24.2575	23.9748	25.5025	24.6385	25.0822	25.6355	25.2231	25.1349
MA-00067-259	31.4897	22.5849	25.091	23.2115	24.0032	24.2431	23.9969	25.5033	25.8527	23.6247	25.7274	25.6425	22.1171	24.7248	22.6031	22.7174	23.9188	23.4154	25.0429
MA-00270-176	31.4865	25.3778	26.1272	25.3425	26.5579	25.791	26.6179	25.9512	24.6065	24.8129	27.4255	26.1876	25.6095	25.5306	26.9277	26.52	25.9465	26.3085	26.1645
MA-00120-611	31.4247	31.1422	31.123	30.8499	30.8524	30.2451	30.602	29.7961	30.2077	29.9207	29.6954	29.6625	29.9494	30.2422	30.0268	29.3845	29.896	29.8473	29.9925
MA-00120-384	31.3976	29.6105	30.1505	29.6482	29.6215	29.6054	29.6221	28.2639	28.6779	28.7477	28.3944	28.5626	29.1273	29.3257	29.2306	28.3251	28.4782	28.814	28.9774
MA-00334-385	31.39	25.3467	25.269	25.3932	27.0963	25.6713	26.0103	23.7766	26.3162	25.6199	24.5515	27.1051	26.2378	25.7394	26.8846	27.3748	24.4978	26.5411	25.5951
MA-00101-8	31.3026	23.5813	24.4375	24.0777	22.0296	24.0602	25.0441	21.919	24.1567	23.6577	23.9445	22.0564	22.9372	29.0787	28.6051	22.9541	23.8918	23.4386	23.4051
MA-00090-273	31.278	28.276	28.0938	27.7755	27.6279	27.1287	29.0354	26.6828	27.6256	27.4738	26.6146	27.019	27.1968	28.084	28.166	26.9957	27.0101	26.3157	27.009
MA-00111-89	31.2765	24.6913	25.0003	24.7136	24.9628	25.0703	24.8538	24.2082	23.6305	24.5533	22.1744	24.5908	24.6897	24.4656	24.4232	22.9391	24.6013	24.9082	25.4204
MA-00210-104	31.2071	24.5343	25.2293	23.8081	24.7684	24.4663	24.89	23.536	24.0094	24.24	23.786	23.3448	23.8986	23.8838	24.1241	23.9965	23.2968	23.7523	23.0066
MA-00073-495	31.1946	24.6352	26.792	24.5764	26.6034	26.9411	23.99	27.7216	27.6484	26.7728	27.1836	27.4447	28.7843	28.79	28.1163	28.9215	27.5273	27.8085	28.0339
MA-00073-79	31.1359	26.7929	28.1222	26.9105	28.2304	27.1026	27.3518	26.1496	26.9954	26.5238	26.2414	26.9241	26.4709	26.4859	27.025	25.3551	25.6237	26.5962	26.3798
MA-00182-156	31.1334	28.8593	28.3566	28.1921	28.4046	28.6188	28.8237	27.2927	28.1791	27.9602	27.7484	28.1844	27.8335	27.6146	27.9786	27.2973	27.3058	26.7929	27.7829
MA-00189-376	31.133	32.131	31.9728	31.902	32.2229	31.862	32.5848	31.6879	31.8657	31.6705	31.7709	31.5634	31.5738	31.6504	31.442	31.5591	30.846	30.4625	30.864
MA-00184-529	31.111	25.8698	26.3583	25.6774	26.7688	25.8319	26.113	25.4238	25.4458	25.5847	25.1698	25.4593	25.1362	25.4987	25.3096	25.6234	25.1726	24.8511	24.2952
MA-00268-127	30.9719	32.9503	33.2897	32.966	33.7946	33.933	34.2408	34.0592	34.809	34.043	34.1377	34.3303	34.4334	34.5238	34.2897	34.3892	33.7252	34.1529	33.9763
MA-00189-397	30.817	26.324	25.4604	23.6169	25.8141	23.244	24.371	23.6302	24.1339	24.1356	24.0184	24.097	24.171	24.6956	24.137	25.3753	23.9181	25.1333	26.3437
MA-00326-122	30.765	25.0162	25.2195	24.7269	21.4046	25.3534	25.0172	24.3458	21.9695	23.0717	23.0806	23.4025	25.0694	23.5024	23.3656	24.6085	22.5037	24.3193	24.6976
MA-00213-230	30.7266	25.3912	25.7829	25.1905	25.7363	23.1606	26.0728	23.82	26.1337	25.2613	25.3246	25.4243	26.2023	25.9971	26.369	24.9208	25.8398	27.0125	26.6698
MA-00162-320	30.6848	22.6501	21.9181	22.5829	23.6214	23.4183	23.5418	24.2959	22.7608	22.9173	22.0491	22.2233	22.7485	24.1602	22.5673	24.1125	22.3746	20.2249	25.7055
MA-00072-168	30.6808	28.1135	28.0128	27.8996	27.9279	27.9284	27.9423	26.6923	27.0851	26.685	26.8059	26.926	30.4313	27.5938	30.5797	27.1741	27.0722	27.5756	27.9924
MA-00090-270	30.6786	22.7627	22.5664	21.322	24.4962	24.1153	24.0766	24.3004	22.9499	23.1762	23.9944	23.5935	23.4378	22.1472	24.9916	23.9703	23.5883	23.9237	23.8897
MA-00213-318	30.6302	26.4053	25.2544	25.4079	27.5646	27.2148	26.2646	25.2845	25.1913	25.4891	25.609	26.0047	26.3172	25.4945	26.2381	25.2676	26.1049	24.8629	26.4013
MA-00139-100	30.5925	34.3502	34.4146	33.9677	34.4823	34.0832	34.3101	33.5867	33.9848	33.715	33.2112	33.4702	33.4209	33.6198	33.5412	33.3303	32.706	32.9299	33.0816
MA-00210-249	30.5831	26.5484	27.2534	25.2261	26.9143	26.8591	26.4959	25.1517	22.8986	26.803	25.4663	26.771	26.3711	28.3423	28.7202	23.8541	27.0445	26.9807	27.2247
MA-00090-530	30.4869	31.8689	32.2355	32.0547	32.0083	31.7603	31.8907	30.6968	31.3927	31.3115	30.8507	30.9347	31.0228	31.1342	30.7118	31.0702	30.9035	31.1258	31.2422
MA-00120-370	30.48	27.4145	27.5213	26.1002	27.5983	27.2687	27.4247	26.0403	24.4249	26.95	25.4796	25.7895	26.6528	27.3565	27.067	26.5825	26.8498	26.9885	27.6422
MA-00090-175	30.3747	27.0706	26.9647	26.6483	26.6734	26.3356	27.2341	25.3588	25.2643	25.8811	26.6842	25.463	25.8537	26.6926	26.0162	26.4497	25.4903	26.5307	27.3625
MA-00213-474	30.3191	29.724	29.773	29.513	29.7503	30.1955	29.9197	29.5413	29.2688	29.0833	28.9762	28.9116	28.5238	28.4115	28.6657	29.026	28.7353	28.8101	29.4119
MA-00139-196	30.3119	24.758	25.7936	25.524	24.6667	24.0762	24.88	24.646	25.1007	24.4378	25.2238	24.37	23.0161	25.1629	25.1608	24.9035	25.8748	26.0161	25.8604
MA-00073-77	30.3116	29.8852	29.7924	29.3198	29.9874	29.7208	29.996	28.6098	29.089	29.2606	28.9431	28.7228	29.1244	29.7509	29.3703	28.9508	29.8632	30.0903	30.5984
MA-00270-163	30.2797	26.8855	27.0338	26.537	26.7469	25.4077	26.9557	25.3067	25.2719	26.047	24.5092	26.4855	25.4501	25.991	26.4718	24.034	24.0732	26.3025	25.7654
MA-00182-351	30.2601	32.0736	32.2168	31.8599	32.8815	32.5053	32.5573	32.9884	33.1535	33.165	33.3303	33.3033	33.2897	33.3828	33.3828	33.2759	32.8165	32.8533	32.9672
MA-00153-280	30.2577	28.1805	27.6985	26.5952	28.4971	28.1256	28.8487	29.2666	29.6641	29.814	29.0042	29.3047	29.128	28.7161	27.7923	28.8316	28.3514	27.5497	27.9784
MA-00055-319	30.2355	30.9769	31.1503	30.8036	31.4879	31.5855	31.7088	31.9694	31.9399	31.9129	31.6032	31.3477	31.6334	31.3369	31.4417	31.2778	30.3172	30.5317	30.6829
MA-00101-79	30.1613	26.321	26.8375	25.3846	26.5608	27.18	25.6144	25.2936	26.2742	26.669	27.0104	27.135	26.8115	27.0178	26.6342	26.9303	24.3949	26.0231	24.3102
MA-00055-141	30.1122	24.52	24.8035	23.041	24.7439	25.258	25.5184	24.5721	25.4244	25.3872	25.7807	25.6162	25.8592	25.5669	24.2508	24.9756	23.7466	24.3556	22.9668
MA-00334-389	30.104	27.7506	27.4286	26.8604	28.183	28.0222	28.0594	28.4081	29.0687	28.881	28.9193	28.6593	29.1509	28.8414	28.2904	28.252	28.3002	27.6895	28.9804
MA-00073-302	30.0983	22.9399	23.6186	23.2953	23.8306	23.6633	23.5252	23.4606	24.7942	23.2304	24.3494	24.5203	23.3149	24.4738	24.7881	24.7058	23.5011	24.3314	25.4092
MA-00213-628	30.0897	25.2972	26.1504	24.1976	26.093	26.3092	25.5016	26.1902	26.5427	27.0232	26.7491	27.5464	26.4676	26.2118	26.3974	26.1408	25.9302	26.4779	26.0083
MA-00326-54	30.0692	25.9932	26.0066	26.1394	27.3141	27.1244	27.0547	26.1614	26.5196	26.3157	26.3547	28.5967	27.5694	26.6532	26.3529	26.6707	27.4113	25.7267	28.0421
MA-00210-198	30.0448	30.0372	29.9816	29.5389	30.7881	30.533	30.7549	30.4411	31.2888	30.7771	30.6471	30.5725	30.7187	30.8451	30.9814	30.597	29.5678	29.5594	29.9912
MA-00297-260	29.9849	25.2251	24.3669	24.9573	24.0435	24.3541	24.2595	25.9581	25.4325	25.4362	24.6229	24.8487	23.181	25.7407	22.9704	25.9243	24.0278	24.5342	24.3955
MA-00072-338	29.9518	28.4813	28.5307	27.223	28.2546	28.1611	27.8376	26.8771	26.9054	26.6161	27.1299	27.0008	26.8548	27.9108	27.452	27.628	26.9409	26.3414	27.6739
MA-00210-142	29.939	27.4805	26.9199	26.948	27.1785	26.6637	27.509	25.5368	27.3043	27.2644	25.981	25.4989	25.9789	26.9023	25.8375	26.943	26.2609	26.7705	26.6968
MA-00112-221	29.9361	31.3173	31.1377	30.904	31.4134	30.6881	31.0918	30.2111	30.8235	30.5904	30.3184	30.3655	30.246	30.0931	30.0864	30.1588	29.6969	29.7276	29.942
MA-00153-435	29.9252	27.0674	27.7718	26.7445	27.6105	27.2659	27.6237	26.5521	27.1561	27.1851	26.1482	26.2806	26.9311	27.2857	26.7345	27.2601	26.0734	25.1476	26.3599
MA-00162-163	29.7864	27.3425	27.0445	26.7205	27.0776	27.2883	27.0578	26.3986	25.897	25.7432	26.3854	26.0039	25.6461	26.2705	27.0985	26.5061	25.685	26.0645	26.7766
MA-00101-485	29.6537	23.7415	24.0487	22.7923	23.1748	23.6891	23.6751	20.9654	23.3253	22.9581	23.856	20.3298	24.7861	23.8293	24.6261	23.2169	24.5481	25.13	24.1547
MA-00101-676	29.6526	28.4706	28.6196	27.9644	27.2728	28.058	28.2772	27.6689	27.607	27.5549	27.2744	26.6246	27.6097	27.1487	28.094	27.0102	26.6724	26.3723	27.1883
MA-00090-303	29.6507	22.7759	24.4054	22.1284	22.8828	23.1962	23.4974	21.4941	21.8604	23.5071	22.452	23.0934	21.6265	23.2273	23.5053	23.8204	20.6432	23.5032	21.9506
MA-00297-79	29.6278	25.6385	23.7412	24.185	25.4061	23.4112	23.8666	22.3803	23.1786	23.3062	22.8456	23.2764	22.8555	23.3871	22.5158	22.5986	23.1917	22.9812	25.3116
MA-00153-254	29.6087	26.2845	24.4316	24.9261	25.5773	25.9454	26.103	25.8848	26.4482	25.9346	26.3368	26.0244	26.2607	26.1569	26.0784	25.9819	23.2065	25.2141	25.8211
MA-00162-60	29.4999	30.5028	30.7692	30.0774	30.6545	30.656	30.9377	29.4557	29.9464	29.8195	29.9327	29.7026	29.656	29.9989	29.5733	29.4744	29.4774	29.1773	29.8883
MA-00334-287	29.4726	28.6607	29.3051	28.6247	29.4901	29.3044	29.668	28.1613	28.5444	28.5454	28.5765	28.3596	28.739	28.0298	28.2184	28.2557	28.1417	28.087	28.6789
MA-00210-302	29.4681	30.5711	29.6409	31.3904	30.8717	29.6591	30.4727	29.6705	29.8576	29.8624	30.2979	30.0737	29.8463	29.9942	28.2015	29.8855	29.4639	28.9827	29.8502
MA-00189-390	29.4188	26.2641	27.4731	26.3529	27.2028	27.0948	27.1575	26.0512	26.9524	26.8542	26.2337	25.6765	26.1072	26.8413	26.5452	25.5726	25.4018	22.4214	25.6067
MA-00055-92	29.3662	24.3342	24.459	24.8294	23.8461	23.9031	24.5725	24.0683	24.1993	24.4684	24.9677	24.4709	25.2371	24.5491	24.0488	26.356	24.7275	26.161	25.6806
MA-00072-69	29.339	25.5913	25.1802	25.9385	26.0166	24.6003	24.9969	23.6482	24.1106	23.8209	23.9507	24.1241	23.5193	23.9593	24.3153	22.8608	24.0724	24.5888	24.5659
MA-00334-18	29.3284	30.1808	30.4528	30.4596	31.4838	31.1374	31.3658	31.5203	31.8566	31.6246	31.4329	31.8118	31.7311	31.3383	31.4378	31.633	31.0617	32.2478	31.2594
MA-00072-67	29.3113	26.7129	26.6224	26.5871	27.1637	27.085	27.3265	27.8999	28.8829	28.1661	27.305	27.8408	28.6028	27.5122	27.723	27.9058	27.8341	27.3211	26.7068
MA-00073-230	29.2951	31.621	31.3009	30.7196	31.7289	31.0482	31.9901	32.7684	32.7108	32.3616	32.3658	32.3863	32.4531	32.012	32.0775	31.9022	31.899	31.465	32.1872
MA-00153-208	29.2794	28.7854	28.8716	28.2359	27.5921	27.98	28.0531	28.1516	27.2932	27.6972	27.5292	27.1837	27.7015	27.4597	26.9221	27.7387	26.9785	27.2464	26.9237
MA-00162-145	29.1789	24.1405	24.7849	24.1449	24.5124	23.846	24.2896	24.293	24.6096	24.5442	23.8954	24.1726	24.8967	23.7075	24.0226	23.7847	23.1278	22.977	23.2792
MA-00184-501	29.1666	24.1236	24.6813	23.7283	23.6023	24.285	23.8733	24.1293	23.5085	23.2042	23.4543	23.8601	22.3382	23.6056	23.7125	23.1019	22.3354	21.2377	23.1679
MA-00190-22	29.0564	24.5373	25.3043	23.9143	26.1443	25.4411	25.619	25.3377	25.0106	25.8368	25.6455	25.1444	24.0871	23.7298	25.7999	26.091	24.2194	24.2641	23.6561
MA-00090-508	29.0118	22.7798	24.0921	24.1829	25.3877	24.7224	25.3009	25.4376	25.5438	25.2828	24.9974	25.1568	24.8106	25.4356	25.2853	24.9176	25.6281	25.8257	25.644
MA-00055-211	28.9759	25.6721	26.1538	24.5912	24.7131	25.4379	24.8715	24.3045	24.9265	24.7184	23.2721	24.1901	24.1097	23.9155	22.8143	23.803	24.7401	24.0635	24.6543
MA-00213-633	28.9716	26.0341	27.0247	26.6252	26.3466	25.9172	26.992	26.2756	25.9099	25.8	25.6271	25.2829	24.6439	26.4694	26.4448	24.2685	25.1132	25.4759	25.3728
MA-00189-77	28.9457	30.0693	30.2422	28.6722	29.9068	30.0627	29.995	29.0666	28.7668	29.1124	29.2971	29.3084	29.4625	29.4128	29.2671	28.9998	28.1164	28.0286	28.8234
MA-00297-350	28.885	28.9004	28.3813	27.6616	28.7574	28.1701	28.9329	27.4012	28.0909	27.2448	27.8201	27.6827	28.0051	29.6534	29.7992	27.6146	28.8759	28.6939	28.8204
MA-00153-225	28.8497	30.6324	30.26	30.4301	31.325	30.7631	31.4984	31.7354	32.0472	31.897	31.4627	31.4939	31.6439	31.7327	31.4793	31.3609	30.9291	31.1404	31.2781
MA-00101-65	28.7198	24.9309	23.891	23.2485	25.4651	24.2025	25.6257	23.7253	25.7759	24.136	24.5499	23.7826	22.9444	23.2314	23.7043	24.6932	23.6914	25.2296	24.5666
MA-00334-226	28.7119	29.2325	29.0138	28.5959	29.7114	29.3451	29.7914	29.1352	29.4125	29.1786	29.0993	27.811	29.2317	28.1329	28.2296	28.34	28.6154	28.5784	29.0713
MA-00182-97	28.7017	30.981	31.3479	30.7371	31.2494	30.6587	31.1066	30.0337	30.2462	30.0738	30.1181	29.8822	30.1294	30.4155	30.3534	30.0417	29.6334	29.9771	30.0473
MA-00184-234	28.6974	28.9213	29.2884	29.0141	29.0139	28.4001	28.7496	27.781	28.4581	28.2541	27.692	27.9681	28.3082	27.994	28.0934	28.0356	27.8029	27.5243	27.9484
MA-00073-313	28.5449	28.4641	28.4468	27.1916	27.5779	27.3144	28.2603	27.6583	26.5378	26.9195	27.6669	26.994	27.3844	27.4479	27.0696	26.9165	26.4686	26.502	26.7941
MA-00210-177	28.5279	27.9427	28.0781	26.7941	28.7349	28.4195	28.9406	28.3297	28.2468	28.412	27.6842	28.0334	26.7966	27.8303	28.2581	28.8728	27.3201	27.0802	27.6429
MA-00120-281	28.4994	28.1051	28.1197	28.1979	28.8168	27.3039	28.1281	26.8173	27.5404	27.3416	27.5049	26.5135	27.7914	26.7747	27.1853	26.9002	26.0258	26.3983	27.4
MA-00055-223	28.4855	26.9816	27.3109	26.7984	27.3016	26.9283	27.1409	26.4016	26.1481	26.3964	26.0809	26.0498	26.1413	25.9031	24.96	26.4086	27.0727	26.1682	25.567
MA-00120-45	28.4084	29.9445	29.983	29.1253	29.4442	29.6325	29.9854	29.2278	29.6198	29.5986	28.9953	29.1188	28.6462	29.2292	29.4713	28.8883	28.2913	28.1226	28.7593
MA-00153-54	28.3666	24.6192	26.2627	23.7581	26.4276	25.2801	22.9177	24.5582	23.8633	22.6042	23.1891	23.5615	22.4719	22.9956	22.7248	23.0719	24.0854	24.2706	22.8422
MA-00090-367	28.2567	25.8565	26.1549	25.0788	25.6503	26.1638	25.5204	25.6565	26.1813	25.5401	26.6039	26.9597	26.5803	27.187	26.8921	27.0891	26.0247	26.3494	24.4399
MA-00108-2	28.2523	25.3847	25.1675	25.6387	26.5314	24.4397	25.7591	26.203	29.4261	26.8903	26.3519	26.2788	27.4184	26.5333	25.4093	26.875	26.2907	25.535	26.3854
MA-00334-9	28.2503	27.557	27.8592	26.8344	27.2143	27.5051	27.4303	27.4375	27.0183	27.6227	28.2798	26.8998	28.2967	28.392	27.3967	27.3876	26.2082	26.1647	26.3788
MA-00111-105	28.2207	29.5417	29.1195	29.2781	29.8186	29.0136	29.6364	29.9669	30.2003	29.8061	30.45	30.5452	30.4891	30.602	30.4542	30.4814	30.0417	29.6267	30.5166
MA-00067-322	28.1549	23.0875	23.2121	22.2952	22.4018	22.965	20.2431	21.6728	21.6068	22.2943	22.5703	24.959	22.3926	22.3171	22.0846	22.7644	20.679	21.4791	24.0088
MA-00323-90	28.1473	31.4898	31.3648	31.1903	32.3265	31.6786	31.8457	32.0557	32.4894	32.3965	31.4852	31.8641	31.602	31.8337	31.623	31.7662	30.6804	30.9518	31.1722
MA-00139-91	28.0306	23.9598	24.022	23.9332	24.7437	24.3649	24.0764	25.094	25.0578	25.0112	24.8846	24.3768	25.0616	25.5474	25.3443	24.8038	23.9498	24.3899	24.5323
MA-00213-70	28.0133	26.4346	27.4964	26.4805	26.4296	26.5492	26.4248	26.0795	26.0915	25.9305	26.4889	26.1869	26.257	25.5456	26.1769	25.7437	25.2515	26.0922	25.0299
MA-00303-30	27.9326	28.7738	29.5716	28.2382	29.681	29.1628	29.8413	29.1348	29.6971	29.6957	29.7061	29.8892	30.0486	29.9632	29.5933	29.7463	27.3752	28.7161	28.4451
MA-00153-112	27.9231	28.739	29.1666	28.3904	29.4105	28.7376	29.4503	28.1367	28.9012	28.5286	28.6865	28.8001	28.8013	28.4599	28.6353	28.3829	28.0716	26.9976	28.047
MA-00334-279	27.9076	30.4433	30.7437	29.9905	30.1358	30.2773	30.4953	30.0701	30.1158	29.8864	29.7504	29.7269	29.7838	29.4206	29.4762	29.1736	29.4453	29.0268	29.0812
MA-00320-81	27.8958	22.6982	23.635	22.2495	22.2666	23.3731	24.0334	21.9887	20.8579	22.6889	21.8794	22.5358	21.8525	23.2451	22.6525	23.1461	22.5038	22.5437	22.3688
MA-00073-452	27.7634	24.7395	24.7634	22.4222	23.3081	23.5745	25.0047	23.5264	24.0772	25.0047	24.6482	24.4581	23.4232	23.1618	23.8384	23.669	21.4084	23.0254	22.7923
MA-00120-582	27.7625	23.8114	27.2203	26.0513	26.3693	27.2441	24.6192	25.3197	25.923	23.0964	26.6543	27.1449	23.7172	26.4463	24.8861	26.1375	25.8605	26.3497	26.5825
MA-00101-111	27.7325	25.3717	26.0235	24.436	23.3305	24.5106	23.9988	25.1093	24.868	24.5484	26.975	26.9607	24.9267	27.1671	25.784	25.7275	26.1782	24.7303	25.9282
MA-00139-250	27.6799	23.4178	23.4786	22.6432	25.1508	22.7258	22.9522	21.6505	22.1762	22.9152	22.6853	22.5179	22.9028	22.3206	22.358	22.2092	22.2563	22.0897	21.4056
MA-00073-204	27.6678	30.6295	30.8842	30.2502	31.4987	30.9109	31.2676	30.5993	31.0275	30.9575	30.2919	30.2869	30.5395	30.1553	29.9043	30.3024	29.603	30.0719	30.0406
MA-00184-449	27.6346	30.4217	30.5006	29.946	30.3593	29.9337	30.4253	29.2299	29.6612	29.2168	28.8627	29.1587	29.5117	29.5168	29.3795	29.0671	29.5296	29.6632	29.9258
MA-00139-354	27.6101	25.9546	26.5813	28.2463	26.5633	26.9992	25.8407	25.1323	25.9196	26.0471	25.8632	26.0988	26.1517	26.6278	26.9115	24.3211	26.9168	26.816	27.8347
MA-00268-131	27.5502	25.5107	26.2798	24.3612	26.8108	26.3382	26.2526	27.1426	26.9744	27.0819	26.7111	26.8334	27.1834	27.1171	27.2547	26.6615	26.397	27.3386	25.5504
MA-00320-55	27.4951	29.577	30.0517	28.9492	29.405	29.1717	29.7497	28.2632	28.5884	28.7035	28.4947	28.6414	28.3548	28.9041	29.3436	28.4898	28.1686	28.476	28.6012
MA-00303-40	27.4863	27.969	27.537	27.921	28.194	27.6604	27.5846	27.2033	26.1199	26.7133	26.463	27.346	27.3295	28.2238	27.6944	27.8238	26.0452	26.7	28.7105
MA-00153-269	27.4592	30.7081	31.07	30.5933	31.4435	30.8869	31.2809	30.1552	30.5532	30.335	30.2535	29.987	30.1931	30.1029	30.1443	30.0473	30.012	29.6678	30.373
MA-00189-257	27.3963	30.3997	30.4084	30.0691	30.6414	30.8259	30.8409	30.1147	30.3132	30.2151	29.7717	29.8335	29.6338	30.1477	30.3514	29.987	29.0048	29.5949	29.4987
MA-00182-317	27.3726	24.4906	25.8837	25.6638	26.5861	26.7927	27.2209	26.6014	25.762	26.4443	26.8591	26.8563	26.2204	26.3157	26.7828	26.6327	26.3388	26.5232	27.0257
MA-00067-59	27.3685	26.9889	26.5526	26.138	27.4616	27.4483	27.6448	26.5239	27.3077	27.187	26.6262	26.8863	26.4641	26.6776	25.6495	26.6698	25.8877	25.084	26.6193
MA-00184-365	27.3019	23.493	23.5048	22.0629	21.0087	24.9145	24.0164	22.4396	22.7111	23.2792	22.5363	20.8617	23.6595	23.8245	24.1887	23.4255	24.325	22.7165	23.9776
MA-00210-245	27.2901	23.6054	25.1949	25.6849	26.2475	25.8086	26.0907	23.8859	25.2574	24.6052	24.6253	25.7694	25.5914	26.3256	25.432	25.2479	24.8407	24.6336	24.7393
MA-00101-616	27.2832	25.877	26.1372	25.9866	26.087	25.6007	26.1536	25.7166	25.5858	25.4682	25.0586	25.1704	25.41	24.7942	25.0985	24.5936	24.9523	24.941	25.6366
MA-00055-178	27.2724	33.8792	34.1453	33.5296	34.1828	33.6944	33.9505	33.0131	33.4823	33.0801	32.9168	33.005	32.8919	33.2066	33.0084	32.9043	32.6356	32.6319	33.1137
MA-00090-532	27.2407	22.7673	22.8323	23.0607	25.166	24.0391	24.3064	22.4965	23.5417	21.9745	23.8319	23.458	23.3385	23.22	23.2682	23.5619	22.8039	22.5909	23.1461
MA-00101-572	27.239	25.6941	26.6508	25.4207	26.6638	24.8507	26.3803	25.7628	27.1911	26.6085	25.9311	25.9435	26.413	24.8035	25.2048	25.5225	25.5185	24.9914	25.7268
MA-00189-269	27.2238	24.3383	25.3328	23.7919	24.8922	24.8163	24.613	24.5394	24.2073	24.2767	24.0198	23.8375	24.6848	24.3979	24.529	24.4738	23.2026	23.5468	23.1948
MA-00210-301	27.1831	32.6454	32.6614	32.5074	32.6176	32.0374	32.4528	31.3204	31.7239	31.5896	31.5709	31.5203	31.6631	31.6508	31.5019	31.5279	31.1918	31.5861	31.7902
MA-00213-71	27.1815	22.6741	24.2659	23.5964	25.3383	22.6652	24.7491	24.377	24.7598	24.083	24.8147	24.7423	25.266	25.3467	24.4303	23.3745	24.591	24.2466	25.5578
MA-00120-14	27.1789	21.2541	22.0495	21.5534	20.6052	21.6269	21.8088	22.3247	22.4239	22.2591	22.5063	22.4882	22.1438	22.0998	22.0771	22.8877	20.2978	21.5716	19.6845
MA-00067-6	27.1351	24.2099	24.0858	23.3248	23.244	23.4422	23.7098	22.758	22.3755	22.2866	22.2025	23.7449	23.1382	23.8005	23.2821	22.9298	22.6596	22.6419	23.0394
MA-00067-381	27.0945	26.2272	26.6642	26.3559	26.9842	26.8376	26.5911	25.7801	26.3571	25.7134	26.3687	25.8433	25.6299	26.7907	25.8774	26.4089	24.5691	22.5308	25.9384
MA-00213-156	27.0826	25.0007	25.8273	24.8523	26.0637	24.9036	25.6526	24.1318	25.2976	25.3439	24.5961	24.1554	25.2421	24.9347	25.5316	25.1382	23.7897	23.9096	24.32
MA-00073-460	27.07	25.0541	25.0971	22.9707	26.0266	25.7475	25.9109	23.9363	25.9015	24.3316	25.9958	26.1807	24.4642	23.3084	25.4584	24.9016	25.427	24.888	25.9947
MA-00072-98	27.0072	26.9875	28.2162	25.6474	24.2935	27.0341	26.736	26.1286	27.6026	26.9333	28.3839	26.3991	27.0821	26.7907	27.6291	27.5291	26.2925	27.1687	23.7865
MA-00101-696	27.0013	25.3139	25.7147	24.5482	25.9198	25.6486	26.1026	24.6966	25.345	25.0942	25.1889	23.9762	25.5675	25.023	25.2366	24.8086	24.8516	23.2146	24.7061
MA-00184-141	26.9853	28.3426	29.058	28.9994	27.4587	28.1397	28.1173	27.303	28.3027	27.4477	28.2105	28.3412	28.4058	27.6777	27.8986	28.0282	27.1542	27.6731	27.1677
MA-00320-131	26.9693	24.6626	24.1129	22.1117	23.2058	21.3702	23.1801	22.7748	22.363	22.6791	22.3022	22.298	22.2872	22.5641	22.9215	22.7074	21.5854	21.4077	21.5833
MA-00055-29	26.9343	28.8754	28.1558	23.1942	29.1207	28.4862	29.2225	29.1031	23.5926	29.1203	29.2837	29.5692	29.6207	29.6131	29.5643	29.8169	30.0176	29.9814	30.4532
MA-00182-191	26.9252	23.7411	24.888	23.1711	25.1366	24.4221	24.9634	23.1849	24.5906	24.4746	24.853	20.7526	23.6614	24.2768	24.4949	23.7633	23.5115	24.6488	24.2186
MA-00055-20	26.9077	24.1068	23.5701	23.2693	23.4105	23.7279	23.6725	23.6215	22.7201	23.0357	23.6764	22.808	22.7647	23.4838	22.1922	22.984	22.1869	22.482	22.3605
MA-00326-49	26.8499	22.4194	22.5259	21.8664	21.8552	21.9273	23.4448	20.9781	19.3664	22.2708	22.7869	22.6559	21.6763	22.2963	22.6579	22.2469	21.0056	21.8198	21.8062
MA-00090-238	26.8208	24.3076	24.6733	24.7981	24.245	24.0599	23.8682	23.4161	22.0562	23.2492	23.7691	23.7558	23.7263	23.6708	24.2227	23.631	23.3602	23.9406	23.4161
MA-00055-330	26.7956	26.7537	26.6939	26.3288	26.187	24.8506	26.3936	22.7522	25.5914	25.4536	25.1209	25.2966	25.0998	26.3131	27.6335	25.1748	26.5055	25.7767	26.2051
MA-00072-189	26.7892	30.938	30.9267	30.6571	30.7816	30.5953	30.9927	29.715	30.1813	29.897	30.2193	29.9924	29.8014	30.4421	30.1436	29.9822	29.6284	29.4886	29.9618
MA-00090-132	26.7669	29.8974	29.9251	29.1185	29.012	29.3019	29.2304	28.9777	28.7822	28.9119	28.6142	28.2539	28.0887	28.1487	28.0978	28.6383	28.3367	28.3845	29.1655
MA-00090-200	26.7536	26.1686	25.8179	25.4116	25.5961	26.1425	26.3056	26.0048	26.3211	26.0644	26.7974	26.7949	25.1696	26.8156	25.8886	26.1866	24.3853	25.4736	24.4746
MA-00139-152	26.6954	22.4712	22.6317	21.8536	23.9325	20.8927	22.5102	22.2171	21.6978	22.2291	22.9651	22.462	22.9018	23.1776	22.7287	23.781	21.5169	21.8968	21.5667
MA-00184-106	26.6829	31.5612	31.7674	31.5916	30.3515	31.08	31.294	30.694	30.2086	30.473	30.3469	30.4227	30.5285	30.7236	30.415	30.2141	30.3115	30.4543	30.5109
MA-00101-618	26.6637	34.0184	33.6629	33.7252	34.5584	33.8792	33.8974	33.2897	33.4581	33.1432	33.3828	33.0506	33.1155	33.6198	33.5179	33.113	32.6569	32.7152	32.4996
MA-00073-470	26.6327	27.9374	27.8572	27.7783	29.4685	28.1716	29.5394	28.8875	28.6607	28.9588	29.0219	29.066	29.1182	29.2235	29.104	28.8497	28.282	28.6679	28.9653
MA-00153-141	26.6202	24.5763	23.464	24.6556	25.6013	25.1366	25.5779	24.5032	25.3872	26.1151	25.3302	25.7673	25.4499	25.3602	27.0069	26.5729	25.3836	26.0336	26.8668
MA-00189-473	26.5986	25.2463	26.5818	25.3771	26.4608	26.862	26.4381	28.7563	26.0666	25.4187	24.1185	25.9358	25.6819	25.975	26.3196	25.4767	24.2172	23.8163	25.612
MA-00073-528	26.5832	30.9672	31.0581	30.8518	31.2511	30.8442	31.2785	29.7876	30.3107	30.2852	30.0217	30.2255	30.0166	30.2834	30.2846	29.9104	30.018	29.9672	30.3702
MA-00120-225	26.5656	27.1729	27.5242	27.178	27.119	27.3058	27.0023	26.8448	27.2807	26.5012	25.8453	26.6309	26.2482	26.574	26.1238	26.3785	26.1669	26.1901	26.2721
MA-00323-4	26.5138	31.2817	31.722	31.2876	31.6923	31.0385	31.3013	29.94	30.3196	30.3156	30.5362	30.4774	30.7281	30.9342	30.6401	30.4851	30.4666	30.7727	31.171
MA-00120-72	26.5113	24.9205	24.8548	21.4977	26.3497	21.4478	23.3359	23.7598	26.6551	23.8337	24.0546	23.9817	24.3159	24.5194	24.56	25.002	24.7191	27.4615	25.3457
MA-00120-24	26.368	28.5339	28.928	28.4659	28.3489	28.3813	28.3831	27.4659	27.7037	27.4969	27.0872	27.8126	27.6146	28.0578	28.181	27.4569	27.3502	28.122	27.3052
MA-00334-89	26.3261	27.3202	26.5731	25.9397	26.5399	26.495	26.6235	26.2705	25.6189	26.4029	26.6355	26.4374	24.316	26.5787	23.8208	25.2668	25.6229	24.192	25.8264
MA-00184-221	26.2739	28.0801	28.7564	28.1446	28.4771	28.0308	28.4705	26.9048	27.7009	27.4656	27.4165	27.521	26.8461	27.4301	27.8853	26.6923	27.2878	28.0047	27.5033
MA-00139-316	26.268	23.8846	24.2823	22.3286	24.6999	25.2623	23.8298	24.0383	23.7131	23.9889	24.1625	22.7794	24.605	23.9193	25.145	24.0664	23.1702	23.6633	23.2981
MA-00334-496	26.2651	22.5846	22.2103	23.0046	23.3881	22.8486	22.798	23.8336	23.5361	23.3401	23.1852	22.0266	22.2197	23.3609	23.733	24.2257	23.8692	23.1219	23.105
MA-00189-159	26.2501	31.9928	32.4103	32.3084	32.3959	31.9793	32.4116	31.5824	32.0948	31.9083	31.836	31.8626	31.8987	31.6798	31.5919	31.5582	30.7814	30.9022	31.2727
MA-00206-31	26.172	23.1798	23.5664	22.7265	23.362	23.758	24.1726	21.9006	22.821	23.3688	22.7133	22.2978	22.8288	23.3287	24.0212	23.4345	22.1751	22.4316	23.2254
MA-00213-76	26.1073	25.232	24.917	21.4896	23.7514	24.7761	25.2585	23.5689	23.5539	24.7166	24.3901	23.7672	23.8504	24.6662	24.5162	25.1347	23.5384	23.0626	22.9883
MA-00268-101	26.0878	27.0989	26.8716	26.6521	27.2463	27.5917	27.9417	27.7457	28.4355	27.8617	28.1796	27.4066	27.9532	27.8628	28.1721	28.0088	27.3402	26.5127	27.3489
MA-00090-194	26.0876	24.6532	25.0931	23.8362	24.7482	24.2604	24.4909	24.521	23.8751	25.0329	24.4643	25.3579	25.3197	24.6916	25.25	25.272	25.568	25.8517	26.353
MA-00120-190	26.0805	30.3504	30.2317	29.7908	30.8555	30.5757	31.1315	29.8007	30.4052	30.6456	30.107	30.4499	30.2424	30.7402	30.178	30.5619	29.59	29.088	29.5159
MA-00073-671	26.0771	30.5119	30.3613	29.6922	31.1422	30.8371	31.0108	30.6425	31.3936	31.2647	31.4184	31.3463	31.2166	31.7356	31.3385	31.5592	31.665	31.5942	31.9483
MA-00120-270	26.0042	30.9212	30.6384	30.154	30.8456	30.5169	31.0182	30.2136	30.6178	30.4205	29.4952	29.619	30.2988	30.6858	30.2001	30.2694	29.7588	29.3666	29.5199
MA-00090-459	25.9864	27.0696	27.361	25.4924	27.4367	27.3329	27.5928	26.6923	26.8588	27.3179	27.2625	25.7297	27.3348	26.2886	26.0008	26.8238	25.2399	27.1898	25.5288
MA-00184-87	25.8687	29.2477	29.3231	29.0885	30.1117	29.6236	29.9129	29.9878	30.0901	30.0989	30.3634	30.1272	30.4171	30.5657	30.617	30.3606	29.8385	30.1099	30.298
MA-00153-325	25.8637	26.729	26.6034	26.6256	26.9021	23.9026	27.2576	25.409	26.2659	26.2545	25.7455	26.5506	24.78	26.9171	27.2765	26.6475	26.6053	25.3144	27.1378
MA-00213-221	25.824	27.1295	27.8602	27.8036	28.527	28.2896	28.4741	28.483	28.7267	28.4573	28.99	28.8953	28.9794	28.8422	28.9168	29.0431	28.7377	28.4132	28.8684
MA-00213-637	25.8117	26.3817	25.1298	27.3603	26.2391	26.464	23.6959	26.7436	26.5564	26.042	25.1832	26.8992	27.1104	27.4599	26.733	26.6449	24.3415	26.0906	27.1075
MA-00210-27	25.803	28.4563	28.1041	28.0037	28.4565	27.0195	28.6269	27.3323	27.2971	28.6739	27.4966	26.2332	28.7432	28.8222	27.7475	27.5727	27.8467	25.2708	26.2596
MA-00210-114	25.7934	27.292	27.2125	26.1472	25.6978	26.8065	26.3157	25.8759	25.7345	25.5685	26.2364	26.3168	25.9805	25.7797	25.7676	25.2046	22.9567	23.6021	26.4102
MA-00101-360	25.7658	35.1377	35.2965	35.4458	35.2793	35.0389	35.5726	34.2265	34.6361	34.3303	34.4083	34.3956	34.2265	34.4702	34.4519	34.3763	34.3169	34.1068	34.5978
MA-00120-141	25.7535	32.7813	33.0695	32.263	33.0063	33.0448	32.9598	32.1247	32.4889	32.1509	31.7966	32.0843	32.1834	32.1928	32.1247	31.9227	31.5069	31.8533	31.8177
MA-00184-577	25.7493	24.2975	23.8876	23.5631	24.6714	24.3207	23.7853	25.7581	24.8015	24.9761	24.874	23.8486	23.8007	24.7804	24.8633	24.4493	27.0158	23.6917	24.07
MA-00139-306	25.7323	25.6	25.7403	25.4506	25.5507	25.7273	25.4614	23.8035	24.8735	23.8528	24.9899	25.5011	25.1595	26.0242	25.4595	26.1021	25.0281	24.6703	26.1472
MA-00055-360	25.7187	24.7639	25.3459	24.3812	24.6652	24.2412	26.0451	24.7883	25.1252	25.5333	23.9684	23.9292	24.4697	25.8017	26.0916	24.7765	24.5289	25.6701	24.6431
MA-00221-1	25.6797	25.0074	25.4037	24.8462	24.6697	23.775	24.5412	24.2256	25.7811	23.7438	23.4907	23.5171	24.0252	23.6976	25.045	23.4307	26.3008	23.2731	24.4773
MA-00173-186	25.6012	29.3255	29.7766	29.2592	29.9835	29.6697	30.0661	29.3308	29.8763	29.7726	29.0572	29.1435	29.3436	29.3431	29.4615	29.1241	28.4788	28.497	28.7585
MA-00326-102	25.5741	29.7795	29.7988	29.1803	29.484	29.3586	29.8089	28.9176	28.7738	29.3974	29.3057	29.0891	29.1491	28.6172	28.7838	28.8471	28.3354	28.1661	28.575
MA-00182-331	25.5539	23.6721	24.0213	21.4124	23.6328	23.4685	23.5839	22.474	22.8069	22.8308	22.7742	23.1171	22.711	22.9806	22.7836	22.8585	21.3196	21.8369	22.5146
MA-00073-268	25.5506	22.021	22.1993	21.8292	23.0023	22.3451	22.7018	22.9246	23.2478	22.759	22.9339	22.9726	22.5355	23.6337	23.5173	22.922	21.9786	23.1971	21.9477
MA-00139-273	25.54	29.072	28.9177	29.1659	29.1	28.2036	28.9683	27.9088	27.9154	27.9548	27.8468	27.7456	27.8127	28.439	28.3618	27.8963	27.6377	28.4778	27.9728
MA-00270-211	25.5164	25.6608	26.3257	25.5362	26.6468	26.6858	26.4684	25.3237	26.4076	25.0361	26.096	25.6312	25.7048	24.956	25.0728	25.7816	26.0377	24.8214	25.462
MA-00334-290	25.5158	24.4971	27.8335	24.9237	26.0702	26.2442	25.8527	25.9228	26.6483	26.7155	26.6099	26.9787	27.2662	26.6487	26.6398	27.1603	26.9157	27.8463	26.709
MA-00213-342	25.4939	24.0866	25	24.9261	24.6631	24.465	24.2959	25.4173	23.526	25.3901	23.5235	24.8292	24.1835	24.8112	25.6543	25.567	25.2644	21.3604	22.0502
MA-00334-112	25.4909	27.4909	27.8769	28.1222	28.7104	27.7814	28.7267	26.8803	27.8069	27.0924	27.5416	27.2886	26.9516	28.6937	29.7303	26.5594	27.9814	27.5663	27.8781
MA-00072-102	25.4702	26.6436	26.7846	27.2842	27.6247	26.3962	27.2532	26.5603	26.5278	26.0928	27.2088	26.8341	27.1022	27.4289	27.4815	26.5358	25.4018	25.4878	26.3432
MA-00139-41	25.4699	25.8766	25.5108	24.4672	26.0242	24.25	26.9158	26.3834	26.7661	25.863	24.8914	25.2243	26.0393	25.6303	26.9123	26.2664	26.0701	26.1573	26.7372
MA-00334-232	25.4628	22.3945	23.1331	23.0124	23.2118	23.5315	23.4001	24.2744	23.1353	23.6528	22.8821	22.7875	22.8763	23.0381	24.2555	24.5189	22.7534	22.9062	23.5637
MA-00210-252	25.4319	27.1316	26.2961	26.023	27.4078	26.7434	27.1	27.1622	27.8841	27.6151	27.5189	26.8176	27.2493	26.9366	27.0056	26.8686	26.2681	25.628	26.4582
MA-00101-311	25.396	26.2417	23.7412	24.0626	25.0313	23.8302	23.1426	23.9524	23.7552	23.3488	23.8044	23.2867	23.0873	24.8538	24.5347	24.4551	22.7094	23.6749	23.1033
MA-00173-155	25.3192	24.7315	25.0328	24.0473	23.6182	23.2915	24.1368	23.2738	23.8442	23.0114	23.0162	23.4978	23.7706	22.9272	24.1774	23.9473	23.0466	21.8711	23.4514
MA-00213-260	25.3049	24.7829	24.3322	23.822	24.5984	24.2723	24.1451	24.1449	23.8998	24.1634	23.9575	24.9985	23.9112	23.9555	23.3259	23.955	23.3232	22.7375	22.9579
MA-00112-175	25.3033	32.7476	32.8485	32.4143	32.5978	32.234	32.4997	31.4134	31.8266	31.817	31.5335	31.8102	31.7263	31.7453	31.6017	31.5222	31.2724	31.6931	31.8362
MA-00189-514	25.2934	31.3782	31.3728	31.1163	31.8771	31.4851	32.1429	31.689	31.6968	31.7291	31.3367	31.1383	31.8082	31.4971	31.496	31.07	30.5199	30.0864	30.9443
MA-00073-308	25.2269	27.0231	27.4188	27.3248	27.3883	27.1554	27.5801	27.0595	26.8385	27.216	25.2803	26.861	27.9945	26.9277	26.3406	25.2758	26.2722	26.3709	26.9309
MA-00297-371	25.2114	22.3148	20.8293	22.775	23.3712	19.9099	23.6271	22.4309	21.8045	22.3384	23.3616	23.1239	21.092	22.8537	23.5908	23.2939	23.554	22.9762	23.276
MA-00184-383	25.1346	23.0969	24.5459	22.4539	23.7918	22.7314	22.7571	23.1181	22.4297	23.5262	23.915	23.3406	23.6865	23.2661	23.4643	24.7376	20.9188	23.2879	22.7704
MA-00184-464	25.1161	25.6138	25.6305	25.1657	25.7023	24.5243	25.2445	24.0318	23.9568	24.9714	24.1361	23.405	24.5877	24.8364	25.0947	24.601	25.1414	24.4924	24.069
MA-00297-268	25.1045	28.0478	27.8633	27.6265	28.3018	28.5045	30.3181	28.6705	28.8003	28.7747	29.2155	28.9367	29.1516	29.3823	28.9495	28.7309	28.6063	29.0004	28.9777
MA-00184-344	25.0868	25.5147	25.159	25.3567	25.7973	24.8546	24.7239	25.2843	25.9212	25.6496	25.462	24.3498	25.2306	24.8077	24.4755	24.7921	23.0325	25.0483	24.4063
MA-00055-176	25.0836	24.9306	26.3646	25.4919	25.9436	26.0791	26.7822	25.5254	24.4744	24.8115	25.9396	25.0397	25.1357	26.5583	25.8321	25.8846	25.8522	26.358	27.3778
MA-00153-432	25.0298	28.5183	29.0139	28.2664	29.1347	28.5098	27.7688	27.4428	26.8701	27.9366	27.9449	27.1386	26.9054	28.7069	28.7643	26.7628	27.7114	27.5923	28.6323
MA-00067-214	24.9667	29.5206	29.2176	28.3292	28.8664	28.7323	29.6246	28.1706	28.3559	28.309	28.7182	28.8729	28.6674	28.4261	28.4738	28.4315	27.7737	27.4726	28.2975
MA-00189-489	24.9409	28.6505	28.8009	28.1177	28.7225	28.0611	29.0039	28.4206	28.3536	28.8282	28.5873	28.8067	28.7115	28.2419	27.996	28.6241	27.4477	27.6094	27.0644
MA-00073-562	24.927	35.4853	35.4943	35.3169	36.1185	35.809	36.1434	35.386	35.6361	35.4519	35.0793	35.099	35.1901	35.2514	35.1029	34.9063	34.6735	34.4883	35.043
MA-00073-407	24.9238	26.3224	22.7988	24.9172	26.5295	24.771	26.745	27.1452	27.2979	26.2991	27.0864	26.3834	26.8324	26.9367	26.4937	26.8838	26.2802	25.7154	25.3798
MA-00268-158	24.9215	25.4252	25.3404	25.0914	25.3978	24.3431	26.1893	25.4639	25.7063	25.547	26.2886	25.9505	24.9901	26.1215	25.5561	25.8005	26.3794	27.2213	26.7898
MA-00210-237	24.8785	29.0689	27.9176	21.9456	24.8804	25.5296	25.0626	26.0044	26.0943	26.0543	25.9471	28.2661	26.2941	25.7843	26.0002	25.964	25.3427	25.2532	26.7204
MA-00153-429	24.7947	27.0559	26.9826	26.6695	28.0978	27.0389	27.8654	26.7972	27.0425	27.6804	27.6638	28.4449	27.7725	27.7468	28.1365	26.6947	28.1553	28.2459	28.1363
MA-00162-260	24.7888	22.435	23.1062	19.5162	23.3199	21.7355	22.4439	21.6468	22.0177	21.65	21.4534	22.004	22.9328	22.5953	21.5532	22.2782	21.5386	20.7744	20.8692
MA-00334-151	24.7802	28.1285	28.1841	28.4825	28.4077	26.7371	26.7887	26.1339	26.8942	27.6205	26.9298	27.674	27.6499	27.822	27.3967	27.698	27.1403	27.2683	28.1939
MA-00073-660	24.7782	29.7322	29.8862	29.4367	29.7323	29.3916	29.7323	28.4005	28.9877	29.2086	28.6753	28.7625	28.771	29.2137	28.6804	28.4947	28.4141	28.5936	29.29
MA-00139-53	24.7719	26.5901	27.9891	26.5137	27.4257	27.1386	27.6668	26.2411	27.2373	26.6819	27.1358	26.5505	26.6834	25.983	26.6742	26.4278	25.6676	25.9106	26.6046
MA-00190-76	24.7539	27.06	26.9143	26.4575	27.5309	27.336	27.2567	26.4964	26.8066	26.1309	26.2231	25.4087	26.5032	26.3485	26.5865	26.0177	25.9113	25.9985	26.9798
MA-00334-340	24.7427	29.1282	29.4872	28.789	29.7896	29.6198	29.9575	29.1963	29.4081	29.5769	28.6572	29.1402	29.1984	29.2488	29.2723	28.7381	28.7217	28.0118	28.3941
MA-00090-212	24.732	31.9742	31.8425	31.411	31.9673	31.7578	32.2825	31.0567	31.6747	31.3656	31.0036	30.8155	30.9018	31.1204	30.6997	31.4711	30.9326	30.9347	31.1777
MA-00297-408	24.6858	26.7877	24.1963	25.9641	26.4033	25.0928	26.6543	25.1739	22.5766	26.0779	25.601	24.7711	25.1675	26.002	24.3067	25.4538	25.774	25.5381	25.3605
MA-00297-342	24.6781	29.6458	30.0936	29.3417	29.6934	29.3623	29.8533	28.659	29.2006	29.11	28.4466	29.0061	28.9299	29.2264	28.6513	29.0897	28.7123	28.1801	28.6608
MA-00073-262	24.6652	25.1156	25.2525	26.046	27.7361	26.5622	27.0694	26.6894	27.407	26.0572	27.2024	27.1041	26.526	26.5522	26.1986	26.4412	26.0762	26.4071	27.2968
MA-00270-204	24.6616	26.1617	26.7651	26.4499	25.2801	25.6893	26.039	24.7902	25.4164	25.3988	25.2301	25.2574	25.4011	25.5625	25.5462	25.5577	25.4624	25.8581	26.1936
MA-00213-96	24.6383	25.8879	25.6734	25.0909	25.8398	25.2012	26.0753	23.5489	25.0313	22.89	25.0793	25.2265	24.7166	25.077	24.9459	25.0193	25.1534	24.5183	24.7166
MA-00120-456	24.6286	24.819	25.5479	24.9316	25.4353	25.321	25.304	24.2183	25.0779	23.2359	24.1717	24.1684	25.0193	25.1798	25.3402	23.5121	23.7225	24.5675	24.3942
MA-00101-539	24.6108	26.8967	27.6382	26.5718	27.3813	27.3376	27.9913	27.353	27.5962	27.5896	28.0614	28.3367	27.8773	28.4314	28.572	27.8841	27.9577	27.8054	28.0785
MA-00072-233	24.5237	29.6744	29.6984	29.5207	29.7973	29.4359	29.8191	25.66	28.908	29.006	29.2667	28.9733	29.1232	29.3605	29.0691	28.9314	29.2163	28.8873	26.1349
MA-00120-363	24.5143	25.3013	25.6645	25.1781	25.8134	25.7755	25.3178	26.0723	25.6598	26.1928	26.6791	26.1959	25.1438	26.5904	26.6468	26.3795	25.8384	24.9281	25.4208
MA-00120-593	24.4726	26.5622	23.7754	24.6038	25.2545	23.258	24.3067	23.7606	23.7982	23.9682	24.4118	24.722	24.7335	23.7471	23.1013	23.8036	23.2234	23.457	24.1986
MA-00090-313	24.4466	22.462	23.1035	23.2499	22.9759	24.0373	22.383	21.6678	21.3951	22.0441	21.7115	21.8346	21.811	22.0696	23.9354	22.6903	22.6705	21.7215	21.5846
MA-00055-102	24.4284	25.6726	25.1585	25.7902	26.1883	25.6061	25.2655	26.069	26.4876	26.6664	26.3746	26.6725	26.7132	26.7807	27.0298	26.8048	26.5457	26.7318	26.3549
MA-00182-184	24.4076	24.7938	24.484	24.8739	23.8598	23.5883	26.5519	24.6015	23.5525	24.8358	23.7839	26.4801	26.0843	25.7917	24.1294	24.4276	25.7004	25.4699	26.2643
MA-00073-375	24.3835	24.7898	25.211	24.2155	24.9248	23.9503	24.4074	24.7009	25.008	24.7789	26.4105	25.1526	25.7388	25.7391	24.6447	24.0816	24.4492	24.0819	25.5984
MA-00101-67	24.3561	21.4355	21.4397	23.4837	22.092	20.4831	24.282	22.1927	23.116	22.5389	20.8182	21.2159	22.046	23.0293	21.1874	23.1521	21.9311	23.2225	22.3996
MA-00182-127	24.2957	22.1817	21.678	21.419	20.6737	23.1609	23.1908	23.2574	18.7788	21.4224	21.5224	22.1795	22.9251	22.8384	22.4856	23.2883	21.3599	22.1808	20.1952
MA-00112-128	24.289	30.8671	31.0209	30.2572	30.3133	30.6088	31.0691	29.8066	29.9158	30.1654	29.6571	29.7756	29.962	30.0884	29.939	30.6299	29.4392	29.3857	29.757
MA-00101-145	24.2523	21.9337	22.8368	20.4005	22.3441	21.7386	21.9235	23.1887	22.3975	22.0987	22.34	23.246	23.1644	22.7851	22.4633	22.4377	21.5717	21.8958	21.2933
MA-00210-130	24.226	30.7499	31.0848	30.4069	30.9758	30.7188	31.1277	30.6129	31.1542	31.2506	31.6198	31.9751	31.5691	31.9685	31.5936	31.6179	31.2955	31.5115	31.7384
MA-00190-89	24.1241	23.5953	23.4735	22.6027	23.9849	23.5576	23.8299	21.4681	22.3376	23.2487	24.0134	23.9261	23.7123	22.9929	23.3704	23.5416	22.3382	21.9806	23.5579
MA-00334-315	24.1145	24.4	24.4686	23.1417	23.3961	25.1944	24.1193	23.4493	24.2706	23.809	23.4896	23.5672	24.136	23.9305	24.4293	24.7173	22.8926	23.5271	22.2989
MA-00090-538	24.0811	27.0559	26.1699	26.2307	27.8768	27.5096	27.2586	27.1998	27.5885	27.8065	28.0536	27.2804	27.765	27.7517	28.34	27.658	27.4788	27.7003	28.2239
MA-00189-501	24.0442	32.7791	32.9637	32.543	33.0038	32.3827	32.8877	31.4614	31.9794	31.9116	31.8815	32.1434	31.9494	32.1271	32.0643	32.0278	31.6154	31.4572	31.8974
MA-00101-455	24.0125	28.8641	28.8393	29.0086	29.4242	28.1313	29.4896	29.1513	28.7343	27.1869	28.3305	26.8612	29.1338	27.5237	28.0734	28.3913	29.3348	29.2377	28.2265
MA-00184-373	24.004	28.5925	28.7362	28.4332	29.3654	28.6054	28.9378	28.0174	28.7582	28.505	27.5301	28.054	28.3071	28.7005	28.2818	28.2642	27.4917	27.1225	27.8709
MA-00139-224	23.9543	27.7879	27.7167	27.1843	27.9315	27.2003	27.7027	28.2194	27.6155	27.6433	27.4598	27.3789	26.9287	28.6084	28.4212	27.9652	28.1979	28.1842	29.3582
MA-00055-186	23.9475	28.1436	29.0068	28.0929	29.0533	28.968	29.2318	29.0375	29.4536	29.471	29.4791	29.7734	29.4347	29.5401	29.6723	29.7519	29.3946	29.7644	29.7084
MA-00184-225	23.9361	27.9957	28.6295	27.7565	28.1946	28.6378	27.9333	27.6819	27.7695	27.8249	27.1886	27.6802	26.906	28.0646	27.4584	27.5858	27.1415	26.7155	27.1435
MA-00101-630	23.914	23.5179	24.7105	23.276	23.6798	24.0309	24.6114	23.1057	23.9688	23.8324	23.4158	23.2816	24.5755	28.4653	24.1578	28.1754	23.0021	24.3314	24.1238
MA-00101-270	23.9095	26.7081	21.9171	26.4309	27.3445	27.0151	26.7175	26.8797	27.061	26.3176	27.8386	27.02	27.2413	26.7294	27.2626	27.3361	26.4986	26.2089	26.3563
MA-00101-398	23.9023	29.3853	29.7844	29.0212	30.0751	29.7934	30.1959	29.1075	29.4311	29.0379	29.2893	29.2737	29.4235	29.0647	28.6397	29.1559	28.4262	28.7997	28.976
MA-00112-188	23.8124	31.6839	31.7942	31.3637	31.5825	31.3622	31.8538	31.0174	31.1122	31.0549	31.5512	31.6281	31.6028	31.515	31.5408	31.3716	32.3174	32.4859	32.609
MA-00326-176	23.7491	23.6163	24.0829	23.8397	22.0305	24.0062	22.6295	22.0173	22.939	23.4685	23.4171	24.0761	24.4488	24.8285	23.9555	24.1433	23.4195	23.9514	24.1203
MA-00210-307	23.7122	33.8138	33.5978	32.966	33.8042	33.6735	33.9591	33.1712	33.3436	33.3828	32.8485	32.6579	33.0008	33.0059	32.9471	33.0618	32.4481	32.6473	32.7254
MA-00073-493	23.6892	29.7246	29.7875	29.0266	29.6182	29.4635	29.5796	28.6299	29.2863	28.725	28.1013	28.7364	28.9684	28.9997	28.9166	28.7706	28.4351	28.3153	28.3796
MA-00112-334	23.6542	26.1551	25.8741	25.9092	25.8809	26.9576	27.1209	26.5514	27.3905	27.7396	27.6695	27.359	26.2948	25.4829	28.14	26.8906	27.0223	26.4165	27.5287
MA-00203-36	23.6371	26.6546	25.5526	25.9995	26.3231	25.6761	26.0795	25.0969	24.9643	24.8475	26.7908	24.9821	24.5114	25.2	24.9081	25.106	24.3738	25.1309	25.5376
MA-00153-217	23.6172	26.4548	26.5523	26.4135	26.5614	26.1724	26.6486	25.6541	26.343	26.0554	25.6093	25.951	23.7756	26.1884	24.246	26.1278	25.6932	25.6871	24.2258
MA-00101-146	23.6164	25.0032	25.7876	24.8865	25.2395	25.4923	24.2773	23.2274	25.718	25.3665	24.9265	23.7121	23.6541	24.6739	23.8257	23.6109	23.5024	23.2831	23.647
MA-00073-221	23.5946	24.1747	24.4957	25.239	24.422	26.0732	21.7268	25.1659	24.7038	23.6202	21.2122	25.0784	23.8327	25.0279	24.0686	21.8042	23.692	23.8272	24.2475
MA-00206-32	23.5649	26.4768	27.1798	26.8136	26.8333	27.0445	27.032	26.7962	27.1169	26.9737	27.6696	27.7171	28.3608	27.9837	27.8287	27.6501	27.4696	27.1591	28.6232
MA-00189-278	23.5192	24.8339	25.2721	23.8897	24.139	25.1149	23.4248	21.6978	23.3671	23.1204	22.7298	23.3108	23.0925	22.5012	23.7793	22.9505	22.9727	22.907	23.3484
MA-00189-163	23.5086	25.2779	26.5783	25.6668	26.0368	25.846	26.1869	24.7331	26.2703	23.9945	25.2988	25.2313	25.3537	24.49	25.6534	26.2259	26.3044	26.2727	26.6384
MA-00297-141	23.4752	24.076	24.7398	23.2894	24.1554	24.2843	24.5156	23.2614	24.2296	23.4299	23.1544	23.2975	23.0046	23.6439	24.1571	23.5571	23.2844	22.8814	23.5899
MA-00055-146	23.4747	27.2364	28.1985	27.0044	27.3946	27.2288	27.3274	27.3301	27.8213	27.6202	27.6613	28.0838	27.9818	28.6882	28.6926	28.2183	27.4598	27.6957	28.1944
MA-00210-205	23.4691	28.4025	28.6465	27.7935	28.6618	28.5487	28.9654	27.482	27.5988	27.2333	28.4439	27.9299	26.9731	27.7879	28.3362	27.9617	27.4763	27.4867	28.6359
MA-00067-349	23.4669	24.4774	24.6484	24.8591	24.1894	21.0621	22.1542	24.5186	24.7725	24.1553	25.0872	24.9201	25.0077	24.9503	25.1545	24.7322	24.6458	24.4898	25.4054
MA-00067-109	23.4599	30.6054	30.4841	30.1115	30.1016	29.6162	30.2263	29.4182	29.6721	29.5482	29.3048	29.3756	29.7489	30.12	29.5491	29.3116	29.2307	28.2794	29.279
MA-00090-221	23.44	26.4393	26.5126	26.8708	26.9555	27.2415	27.7562	27.5295	26.8476	27.4302	27.9138	27.9282	27.6763	26.6863	26.938	27.0663	27.025	27.1577	26.4264
MA-00184-368	23.4358	28.3781	28.1218	27.5958	28.0459	27.7804	29.3055	28.8349	28.87	28.5822	28.8474	28.8955	28.6425	28.1369	28.6452	28.6396	27.5851	27.4196	27.8613
MA-00334-222	23.381	29.1772	29.4569	29.1421	29.0494	29.0303	28.6212	28.0492	28.2242	28.4348	28.3372	28.5614	28.0361	28.4213	28.4757	28.5053	28.0794	27.9162	28.053
MA-00111-3	23.3008	28.0511	27.8014	26.9157	28.5745	28.0949	28.6726	27.7358	28.4643	27.8925	28.1011	27.917	27.6228	28.0982	28.2088	27.6518	27.1693	26.7234	27.5398
MA-00173-49	23.2936	24.2093	24.3763	23.8441	23.5292	23.3697	23.2164	25.3922	25.1862	22.7564	23.7771	23.8532	23.6297	26.1936	24.1014	25.3741	23.5365	22.9908	24.6312
MA-00173-241	23.2784	30.1799	30.0737	29.5351	30.0065	29.5613	30.1637	28.8579	29.1471	28.8761	29.2615	30.9052	29.2321	30.6144	30.7267	29.1492	28.7088	28.3864	29.3463
MA-00153-321	23.2678	31.6295	31.6604	31.0217	32.134	31.8419	32.0901	32.05	32.3023	32.3788	32.5079	32.5557	32.8951	32.8342	32.6721	32.2807	32.0047	32.1857	32.2511
MA-00072-99	23.2043	23.8731	24.6801	25.055	23.275	24.4456	25.4871	22.1254	23.4752	24.347	24.9392	23.4682	23.8596	24.3624	24.0721	23.5461	23.7749	24.0359	23.7294
MA-00173-165	23.1977	28.1466	28.2538	27.9281	28.5159	28.5796	27.9311	27.6415	27.8301	27.9789	27.6372	27.6784	27.7208	27.2884	27.8043	26.6998	27.0941	27.322	27.4371
MA-00297-259	23.1672	26.151	26.5845	26.7423	26.1107	25.2235	25.358	26.3715	26.1328	25.3964	26.6885	27.8472	26.8276	25.593	26.5604	25.5001	26.0647	26.4368	26.5956
MA-00101-150	23.1271	29.1108	29.5633	29.7474	30.0789	29.3521	29.4947	28.7105	28.9581	28.8619	28.6035	28.4363	28.9319	28.8594	29.3089	28.5118	28.1316	28.433	28.8877
MA-00320-175	23.0731	30.7784	31.0324	30.2517	31.1078	31.1827	31.2703	31.095	31.5666	31.2974	31.4379	31.463	31.5348	31.3265	31.5663	30.9057	30.2857	30.4532	29.9038
MA-00189-56	23.0306	28.3947	27.8181	28.0308	28.4259	27.7038	28.2027	28.4711	28.8578	28.4189	29.1099	29.1387	29.3956	29.01	28.9974	29.3597	29.0443	27.529	29.0827
MA-00101-152	23.0289	28.6795	28.8557	28.4417	27.7667	28.505	28.6771	27.8441	27.7446	27.4771	27.4031	27.0199	27.4762	27.4065	27.7355	28.3173	27.9577	27.1573	27.3797
MA-00101-40	22.9918	28.1631	28.5205	26.764	28.3387	27.7228	27.8653	26.8412	27.1683	26.3846	27.3904	27.4651	27.3018	28.0465	28.3096	27.4572	27.3583	27.0998	27.1923
MA-00101-233	22.9637	29.7354	29.7021	29.2571	30.0018	29.797	30.209	29.6232	29.6686	29.5043	29.3395	29.0684	29.6822	29.6042	29.4625	29.5079	28.6667	27.6452	28.9333
MA-00173-107	22.9603	29.327	28.9038	28.2732	29.1444	28.431	28.6614	27.6724	28.0124	28.1211	27.6606	27.6921	27.5623	28.8008	28.5468	27.0576	27.7701	28.0666	27.4712
MA-00184-238	22.9179	28.2679	28.2579	27.4172	29.129	28.0083	29.1907	27.2885	27.5697	27.6483	27.4045	27.0628	28.0337	28.0551	27.7484	27.3904	27.6165	27.1749	27.8796
MA-00162-207	22.9148	31.6962	31.7933	31.139	31.7142	31.3984	31.8268	30.6813	31.3406	30.9061	30.5884	30.5726	30.6264	30.9307	30.983	30.6767	30.5396	30.5676	31.13
MA-00162-252	22.857	22.5505	23.6248	21.027	23.3454	23.9664	22.8576	26.2165	22.5841	23.2076	22.5882	22.4049	23.5413	23.169	23.8082	23.7327	22.187	22.9138	23.5404
MA-00210-288	22.85	28.4661	28.5331	27.5098	27.5956	27.1237	27.8446	26.3195	26.0613	26.9954	27.1761	25.6047	27.1138	27.203	27.4661	27.1648	26.7954	26.8087	27.7369
MA-00073-219	22.8498	29.6439	29.8046	29.2159	29.5286	29.6269	29.7569	28.1986	28.4236	28.7123	28.9505	28.7544	29.2752	28.9191	29.4226	28.7478	27.8237	28.8606	28.913
MA-00213-456	22.8332	25.6364	25.2532	25.4234	24.9078	24.4394	25.66	24.6256	24.9558	24.5385	25.3757	25.9795	26.2373	25.7466	26.3397	25.0976	25.5258	24.9126	25.3692
MA-00162-40	22.8239	26.7575	26.6688	26.2352	26.4749	26.5888	26.5936	26.4085	27.3765	27.2385	27.3963	27.026	27.7614	27.589	27.3899	27.4673	27.2628	27.6065	27.7176
MA-00090-189	22.7671	28.1615	28.6566	27.7281	28.5724	28.5876	28.9161	28.9503	29.1079	28.8861	29.4369	29.1262	29.6172	29.7146	29.3877	29.3043	29.0759	29.2965	28.9992
MA-00173-8	22.7529	24.3479	22.9246	21.8373	23.8873	23.4456	24.1001	23.6135	22.6125	23.7891	23.8535	22.2445	23.4915	23.1825	22.4156	22.7239	22.2759	22.547	22.8048
MA-00213-472	22.7306	25.5583	25.4481	24.1634	25.4465	25.4	24.3316	23.8198	25.494	24.3427	23.4259	24.9286	23.7589	23.7941	24.4058	24.3012	23.3475	24.2215	23.4135
MA-00153-469	22.7111	22.5482	22.2008	22.5627	23.1242	23.1187	24.7808	22.6246	21.8705	22.174	21.6404	21.527	25.3477	22.091	22.924	23.2736	22.4017	23.0803	23.2208
MA-00120-193	22.6887	27.1617	26.8528	26.4918	26.3507	26.2627	26.3965	26.5709	26.6506	26.8504	26.2459	26.136	26.5117	26.7657	27.0075	27.5178	25.8773	25.4043	25.7935
MA-00326-107	22.6751	24.2862	24.9449	23.9348	24.6887	24.4209	24.5673	24.1856	24.4196	24.0062	24.2736	24.4094	24.5882	24.0521	24.0551	23.7541	23.4641	23.4291	23.1623
MA-00213-329	22.6384	24.3679	25.3193	24.7307	24.7112	22.6215	25.0675	22.7769	23.1625	24.1652	24.4389	24.0374	24.0595	23.9573	25.8214	24.8186	24.8059	26.2818	23.4411
MA-00090-502	22.6208	26.7972	27.3064	25.9739	26.8357	27.0977	27.1668	26.4468	27.0748	26.561	26.6171	26.4043	26.5343	27.2027	26.9895	27.0619	25.3494	26.1967	25.6889
MA-00120-502	22.6148	32.7774	33.0565	32.534	32.9848	32.8211	33.0577	32.1947	32.631	32.5202	32.1255	32.3437	32.5355	32.3525	32.418	32.1886	31.3641	31.7567	31.8347
MA-00112-288	22.5951	30.2283	30.2193	29.9514	30.1574	29.7234	30.1187	29.206	29.4663	28.9514	28.7183	29.2487	29.3341	29.2419	29.0276	29.3121	29.1955	29.3385	29.8083
MA-00189-114	22.577	23.2368	24.8571	22.8294	22.7681	23.2134	23.3225	22.592	22.6664	22.6061	21.8769	22.8223	22.0405	22.7965	22.0543	22.7388	22.1167	22.6033	23.0853
MA-00072-77	22.4302	28.5439	28.8634	27.4934	28.8769	28.9915	29.0729	27.7093	28.5213	28.4525	28.2712	28.9224	28.7803	28.8247	28.8564	28.3702	26.9275	27.7108	28.21
MA-00213-630	22.412	27.6998	27.8652	27.234	28.4363	28.0547	28.4405	28.1933	28.6064	28.2273	28.4514	28.1758	28.6026	29.1645	28.9041	28.6858	28.5738	28.4906	28.4751
MA-00184-354	22.3635	25.8263	25.2819	25.73	25.6458	24.9331	23.9704	24.9785	25.8599	25.0289	25.1907	23.9449	26.1824	24.3429	24.0242	24.7911	24.1255	25.2618	25.1393
MA-00072-215	22.343	32.3516	32.4255	31.9643	33.1435	32.9229	33.1731	33.1696	33.4083	33.2336	33.3303	33.3169	33.3568	33.6088	33.3828	33.5412	33.1837	33.0841	33.4943
MA-00184-312	22.3143	26.7452	27.1337	26.0973	26.1731	26.7995	27.0092	25.6647	26.6415	25.2874	25.4675	26.559	25.5364	25.7046	26.312	26.2417	25.5253	25.5014	25.9867
MA-00090-37	22.3062	25.4051	24.6598	25.3039	26.1484	25.981	24.9337	26.6988	26.901	26.0917	26.0769	25.1514	26.3476	26.1286	25.185	25.8104	25.924	24.965	25.5399
MA-00334-484	22.2915	26.9815	26.4403	25.7733	25.573	26.534	26.2094	25.1957	25.0699	26.7325	25.9234	25.2372	26.1608	25.1607	24.7213	25.6068	25.7237	24.6491	24.9733
MA-00213-306	22.2814	24.8998	24.7064	24.9492	24.9582	24.4621	25.0198	24.8612	24.433	25.9558	22.7593	25.889	25.7207	26.0201	26.8473	25.5674	25.7436	22.8148	26.2545
MA-00120-35	22.2585	28.858	28.8671	28.8085	29.3002	28.7892	29.2837	28.9812	29.8256	29.4303	29.9147	29.9373	29.7476	30.0042	29.8434	29.6863	29.7036	29.2892	30.0262
MA-00067-282	22.251	27.1247	27.4567	26.6455	27.931	27.4884	27.6053	27.1857	27.3535	27.2061	27.7961	28.1024	28.4418	28.4152	28.083	28.4696	28.1095	28.1376	28.4952
MA-00210-168	22.2489	27.5422	27.7	27.2853	27.4551	27.7205	28.5125	27.6504	27.7312	27.6253	26.7025	27.3132	26.7351	27.6389	27.3298	26.9014	26.8977	26.2195	27.1445
MA-00213-531	22.2298	25.4597	25.2752	25.1499	24.8098	25.1044	25.7909	24.4984	24.7256	25.077	24.4811	24.3546	23.7286	24.4268	24.7809	23.9066	24.226	24.2598	24.399
MA-00120-595	22.2185	22.9289	22.3173	21.5507	21.2271	21.6058	22.841	21.5998	21.0568	22.0731	21.9015	20.6293	22.2287	22.4877	22.1657	22.6213	21.2388	20.297	21.2744
MA-00323-126	22.1696	25.9435	26.3945	26.3587	25.5886	26.8474	26.427	27.2867	27.1034	27.2415	27.0828	26.764	27.0255	26.3389	26.7713	26.6671	26.3659	25.9023	26.0017
MA-00073-312	22.1159	31.745	31.8695	31.6115	31.9866	31.7045	32.0871	31.5062	31.8657	31.6553	31.2223	31.2066	31.3585	31.1947	30.9359	31.0841	30.8984	30.5579	31.0544
MA-00189-113	22.108	23.1447	22.7258	25.1166	23.1494	24.0498	23.244	24.9295	23.5007	22.7128	22.8063	23.477	23.8912	25.3505	25.035	23.7647	23.2568	23.5544	23.1698
MA-00073-678	22.101	27.0373	27.1257	26.4306	27.711	27.267	27.379	29.7138	30.0229	27.1028	29.5528	27.3488	27.2179	26.7316	27.066	27.0817	26.8471	27.3798	26.8067
MA-00303-21	22.0456	27.239	27.1838	27.0266	27.1715	26.1885	25.311	25.1524	25.0629	27.0785	24.8213	26.8924	26.467	25.9617	26.1755	26.367	26.1435	26.2284	26.7913
MA-00090-379	22.021	21.2936	23.0931	25.1346	24.588	24.1658	24.8219	23.8553	27.1023	23.4699	26.8794	25.3191	25.8751	25.6457	26.2171	24.1497	24.8233	24.5768	25.8832
MA-00184-25	22.0124	27.198	27.7879	26.1935	27.7263	27.0848	28.3492	27.1369	27.4751	27.6841	27.6906	27.5636	25.9064	27.276	28.0204	27.0189	24.2151	26.5564	26.4374
MA-00101-264	22.011	30.8067	31.1115	30.6456	31.0358	30.772	30.8487	30.3613	30.7148	30.4134	30.4535	30.1757	30.0509	30.1303	30.1904	29.9435	29.6565	29.3437	30.1796
MA-00120-259	21.9762	27.3161	27.4934	27.2193	25.9289	26.6835	27.2803	26.5764	27.0419	26.1803	26.9749	26.5652	26.3448	27.3252	27.1771	27.0881	25.8873	25.6839	26.3587
MA-00182-75	21.9459	30.7193	30.4796	30.9501	30.5664	30.3224	30.629	30.204	30.0415	30.1833	29.9631	30.1239	30.1483	30.2715	30.3466	29.9212	29.4723	28.7078	29.9319
MA-00268-208	21.8594	26.1069	27.001	25.5927	26.9469	26.5355	25.4966	25.7123	25.5515	26.1205	25.8485	25.8218	26.1401	25.2084	25.1323	24.927	24.5023	25.5315	25.8715
MA-00162-416	21.8581	25.7285	26.3202	25.8086	24.3229	26.2454	25.6718	24.3662	24.5426	25.2008	25.1237	24.9115	24.1729	25.633	24.5904	25.2036	24.1965	24.2852	26.265
MA-00213-427	21.8539	31.1643	31.4085	31.2463	31.828	30.8306	31.6583	31.7445	32.0212	31.8211	32.3518	32.2592	32.0676	32.3183	32.2495	32.1718	32.08	32.0629	32.25
MA-00184-154	21.8327	30.514	30.5816	30.0871	30.2437	30.1991	30.5046	30.2294	30.0366	30.3354	29.939	29.9256	30.3718	29.6669	29.7385	29.6236	28.6758	29.1107	29.6366
MA-00184-467	21.8189	27.9931	28.7648	28.2057	28.2504	28.4388	28.5226	27.6634	27.4651	27.8875	27.3581	26.0924	28.0363	27.4901	27.2196	26.7828	27.413	26.9872	28.2052
MA-00189-316	21.8042	23.9761	24.1974	23.9321	24.8739	23.9577	24.1194	23.1292	23.5478	23.2215	22.1064	23.3097	23.0413	23.3885	23.3712	23.0368	22.9392	23.0083	23.9466
MA-00153-29	21.781	25.2286	25.205	24.6658	25.3769	25.1723	24.8283	24.8157	25.4809	25.7209	25.1588	24.3353	24.8188	25.1285	24.8055	24.9222	24.0429	24.3081	23.7234
MA-00189-182	21.766	32.9097	32.5929	32.6242	33.3169	32.5436	33.1786	32.3449	32.6733	32.3529	32.5806	32.4255	32.2683	32.5844	32.1604	32.3385	31.8692	31.119	32.0992
MA-00055-203	21.7269	27.8824	27.9352	28.0802	27.9484	27.8703	27.8428	27.2353	25.6843	25.8597	27.3912	28.039	27.7891	27.9849	27.271	27.675	27.4877	28.0312	28.4375
MA-00112-160	21.7223	28.4779	28.9135	27.8028	28.2149	27.8816	28.2343	26.9876	27.9092	27.1254	27.7827	27.5911	27.9372	27.5633	27.2999	27.6218	27.0401	27.111	27.3651
MA-00090-525	21.6983	27.144	27.597	26.2655	26.7488	26.2893	26.909	25.4248	26.1824	25.9077	25.4101	26.5881	26.0298	25.6338	25.7963	25.8148	25.4398	26.3565	26.503
MA-00334-239	21.698	28.0708	27.5434	27.6907	28.2681	27.7694	28.2589	28.0757	28.4289	27.6974	28.2934	28.3261	28.1298	29.0516	28.8474	28.5933	28.6542	28.7556	28.8824
MA-00028-48	21.6715	25.6982	26.1014	25.067	25.4143	25.5315	26.1377	25.3974	24.4975	25.4439	24.7019	25.0537	25.6562	24.6933	24.966	24.7522	24.1279	22.7884	25.6403
MA-00153-668	21.6521	29.627	29.4075	29.4807	30.362	29.8994	30.3124	30.2575	30.7732	30.3486	30.5686	30.1625	30.611	30.6695	30.4907	30.6521	30.4722	30.738	30.8118
MA-00182-11	21.6263	25.9753	25.9885	26.5965	25.1514	25.7565	25.3276	25.9611	26.7363	26.1909	23.8564	25.8715	26.343	26.5343	26.7327	26.5176	26.2084	26.0846	25.4566
MA-00153-589	21.6099	24.7903	25.6562	24.8904	25.9716	25.385	25.3788	25.3605	25.4597	24.7546	25.5511	24.6974	25.1449	24.6137	25.495	25.1929	24.9707	24.0335	23.5438
MA-00297-407	21.6062	24.9741	23.8842	25.1662	25.31	24.7422	25.1312	25.5757	25.0445	25.562	25.8621	25.6316	26.5581	26.1703	25.615	23.8821	25.5187	24.9806	24.3728
MA-00182-131	21.5832	25.1746	24.2888	25.3514	24.3158	25.6666	25.8133	24.1147	24.9625	25.0116	25.3039	25.0231	25.5716	24.3525	25.0844	24.8899	23.4636	23.6416	25.0293
MA-00139-99	21.5805	25.1584	26.439	25.6388	26.6513	26.1752	25.9556	26.72	26.5715	26.4508	25.7854	26.4709	26.8288	25.5057	25.7003	25.855	25.7891	25.06	25.8101
MA-00090-131	21.5637	21.1607	21.0317	21.0745	22.492	21.1596	21.0819	20.8952	20.4503	20.0128	21.1186	21.2571	21.121	22.5776	21.0967	22.4919	21.223	21.648	21.0857
MA-00055-245	21.5509	26.3602	25.7588	25.6736	26.1361	26.3194	26.8134	26.0553	25.5317	24.9794	25.1719	24.6952	25.5126	25.9992	25.8586	25.1432	25.6755	25.5046	26.0657
MA-00101-204	21.5418	27.4817	27.7808	26.904	28.2973	27.2036	27.8437	27.2718	26.9589	27.1697	27.4604	26.6048	26.5165	25.4191	26.5318	26.8288	26.2865	26.5358	27.859
MA-00297-528	21.5198	26.1696	27.0661	26.1758	26.3203	26.6686	27.1574	25.4163	26.5756	26.5345	25.4263	25.32	25.8416	26.5841	27.0837	26.1058	26.3207	26.0956	26.9166
MA-00270-106	21.4871	23.9095	23.9879	23.4509	25.3096	21.6604	24.4353	22.5528	23.2558	23.4361	23.4956	24.1409	23.9857	24.5621	23.9318	24.7854	23.7529	23.582	24.1076
MA-00153-515	21.4457	23.6233	24.7872	24.2191	25.1446	23.8964	24.0763	23.9883	24.318	24.6985	24.8794	24.1592	24.9604	25.2602	25.0721	24.9572	25.4933	25.0059	25.2267
MA-00139-47	21.4152	24.153	24.9604	24.217	25.5088	24.3614	24.8932	24.6146	24.1381	24.6556	24.786	25.616	24.3441	25.9785	25.6497	24.0248	23.8433	23.9013	23.5708
MA-00055-109	21.3624	23.439	23.2901	21.1723	22.2268	22.1067	21.6109	22.6441	23.8283	20.4182	23.2122	22.7601	23.1353	23.2574	22.8943	24.2705	23.9682	22.3342	23.1036
MA-00182-345	21.3262	27.4561	27.1352	27.2164	27.4872	27.2418	27.2567	26.3662	26.1764	26.8791	26.9953	26.4391	25.9626	26.7565	26.8113	26.2203	25.9079	26.4507	27.0268
MA-00120-54	21.3234	30.6787	30.8405	30.6241	30.7921	30.2979	30.7453	29.8138	30.6636	29.9738	29.9228	30.2551	29.8733	29.9246	29.9881	29.9317	29.4018	29.2699	29.9805
MA-00213-249	21.3154	26.282	27.5857	26.0224	26.4161	26.066	25.5684	25.0735	26.1622	25.193	24.9411	25.3058	25.6714	25.4967	24.9441	25.053	25.3126	26.0487	25.6354
MA-00213-583	21.2912	26.8886	26.7474	24.9244	26.8184	27.1595	27.4584	26.3811	25.9858	26.6943	26.145	26.6933	26.3612	26.8159	26.5523	26.904	25.5185	25.1131	27.0447
MA-00323-56	21.2821	24.9624	24.6392	24.3884	22.9971	26.3609	23.5849	22.064	22.3965	24.8358	24.9137	22.9684	22.904	23.2029	24.3539	24.4505	24.4952	24.0872	24.126
MA-00120-110	21.2738	23.719	23.8869	23.0844	24.0467	24.1512	23.6258	22.5687	24.1696	23.5343	24.461	24.7403	24.8767	24.62	24.3799	24.1596	24.5307	23.641	25.1056
MA-00055-312	21.2452	28.4118	28.317	28.064	29.3343	28.9792	29.2453	29.119	29.3955	29.472	28.8667	29.0289	29.3859	29.5285	29.3764	29.1178	28.6447	28.91	28.7823
MA-00162-57	21.2402	29.6975	30.0865	29.5452	30.5913	30.415	30.6186	30.101	30.4757	30.5686	30.9799	30.6107	30.9119	30.9259	30.9472	30.7583	30.7045	31.0043	31.2077
MA-00184-343	21.235	25.639	25.9818	25.5363	24.9717	24.7805	24.9918	25.585	24.1785	24.3908	24.8285	23.4568	25.3406	25.4729	24.6349	24.0876	24.6855	24.0685	23.6785
MA-00112-103	21.2062	23.5798	23.1259	21.9673	22.9665	22.4093	22.9581	23.2494	21.8223	22.6215	22.6545	22.3025	23.2053	22.6108	22.3004	23.5246	21.5679	21.8171	21.4686
MA-00320-161	21.1916	30.7326	31.0673	30.3439	31.7714	31.5558	31.8865	31.3954	31.6717	31.8263	31.6042	31.5252	31.5086	31.6048	31.3485	31.5302	30.9116	30.5279	31.265
MA-00112-133	21.1052	29.815	29.4404	28.9554	28.4853	28.6288	28.7903	28.928	28.9668	29.009	29.5405	29.7334	29.4353	29.8419	29.8253	29.7466	28.952	29.0066	29.5822
MA-00213-625	21.0704	30.103	30.2647	29.7739	30.3643	30.1734	30.6458	29.0861	29.946	30.1577	30.2474	30.2063	30.0576	29.1613	29.8287	29.8454	28.726	28.8297	29.6126
MA-00112-213	21.0331	24.247	23.4746	23.7521	25.602	24.1102	24.6729	23.5424	24.6275	24.9437	22.8193	24.3412	23.2333	22.3929	24.9212	24.2165	24.1737	23.0948	24.8236
MA-00182-186	21.0262	25.1799	25.2163	25.3158	26.5385	24.7651	27.2258	25.9012	25.348	25.4368	24.8399	24.5796	25.0446	26.094	26.1258	25.3201	24.1558	25.0842	25.839
MA-00139-208	21.0152	24.1046	25.3675	24.1783	22.3334	25.017	25.2409	25.1963	25.8538	25.9383	23.7515	24.8334	25.7983	26.0038	26.2487	24.0762	22.9142	24.7471	24.8762
MA-00067-321	21.0077	27.9705	28.3845	28.1005	28.1219	28.2164	28.479	27.129	27.8423	27.5233	27.2752	27.6822	27.1203	27.5026	27.2067	27.6103	27.1041	27.5297	27.7821
MA-00073-338	21.0035	24.1045	24.591	26.4664	23.8519	24.054	25.2354	24.107	25.253	26.1807	25.5717	24.7756	26.6125	25.4585	24.8867	24.6674	24.1827	25.5293	26.0115
MA-00320-30	20.9718	25.6453	24.9914	25.0803	24.8903	24.7112	24.8742	24.5524	22.363	24.7893	24.984	24.403	25.3165	25.7443	24.667	25.3886	25.3217	25.0928	25.9915
MA-00268-19	20.9582	26.8784	27.0843	25.6205	27.0464	26.7512	27.5841	27.2147	27.1302	26.7125	27.0124	27.8627	27.5457	28.3468	27.5474	27.5532	27.5219	26.4583	27.5661
MA-00153-134	20.9403	28.6947	29.1597	28.0483	29.1407	28.245	29.0186	29.1136	29.3226	29.5767	28.9189	28.6823	29.1065	28.9825	28.4467	28.3328	27.1981	28.0195	28.7591
MA-00120-552	20.8535	23.5249	25.9131	25.322	26.1723	25.5834	25.3581	26.0051	25.4038	26.4	26.9599	23.8683	25.4335	25.7525	26.0679	25.793	25.1934	24.996	24.903
MA-00334-56	20.8376	28.2893	26.9489	27.3345	29.0497	26.6983	28.4018	26.3991	27.9152	26.8283	27.1798	27.0551	26.0862	27.4386	26.2595	27.2724	25.6377	26.4483	27.2249
MA-00190-87	20.8303	23.4311	24.0939	23.524	24.0251	23.863	24.1209	22.6047	23.1798	23.8279	23.0979	23.1432	23.0826	23.543	23.1444	23.074	22.2492	22.825	23.3701
MA-00297-285	20.7895	24.1826	23.9795	23.8163	24.7279	24.2031	24.4728	23.0026	25.8109	25.0975	24.727	23.7307	23.2982	23.2126	24.8374	23.3214	23.0965	23.1059	24.2974
MA-00213-102	20.7673	25.5195	25.6743	25.3944	24.9043	25.2634	25.5481	24.9375	24.1241	24.4512	24.2455	23.9657	24.9597	24.4898	24.7041	24.591	24.6049	24.9178	25.316
MA-00297-276	20.7343	27.7792	27.3803	26.3563	26.8574	27.6516	27.1714	27.0965	27.1036	26.273	27.2537	27.3738	26.9578	28.1406	28.6755	27.5674	27.4261	25.701	26.9325
MA-00112-57	20.7333	25.2161	25.6238	24.7608	25.0627	24.958	27.6015	24.2851	25.1726	24.1253	25.6727	24.7417	25.4664	27.9449	25.4933	25.3521	25.848	25.7208	26.2433
MA-00270-132	20.6781	25.9453	26.3725	25.182	24.714	25.8683	23.9802	25.5949	25.2616	24.2351	25.2508	26.0077	26.0172	26.6366	26.1387	25.8735	25.0843	26.1954	26.0976
MA-00326-145	20.6673	26.3022	27.7844	26.2852	25.7823	26.8458	26.9526	26.8381	25.3251	24.1645	24.2602	25.0456	27.2118	27.0357	26.0346	25.7729	25.4182	26.142	25.8775
MA-00334-410	20.6558	31.5616	31.8427	31.42	32.2589	32.1133	32.3905	32.3598	32.558	32.4536	32.1495	32.2606	32.3034	32.2953	32.1659	31.8719	31.3969	31.2273	31.6372
MA-00190-13	20.6547	27.3145	27.8949	27.458	26.6384	27.5508	27.926	27.2147	27.5271	27.2344	27.2357	26.3245	27.2948	26.848	26.7572	26.9808	26.1782	26.6074	26.2762
MA-00090-377	20.6469	30.2106	30.7432	30.235	30.1193	29.9983	30.175	29.1453	29.5084	29.5975	29.255	29.6049	29.5628	29.6926	29.6405	29.1036	29.5443	29.2328	30.2387
MA-00091-1	20.6323	26.4441	26.9317	25.8715	25.5563	25.8804	27.0466	26.3283	25.9281	27.107	26.392	26.1129	27.3371	25.4698	26.2521	26.5647	25.3037	23.3062	26.544
MA-00153-508	20.6091	28.0158	26.8346	26.6768	26.3676	25.6579	26.2528	26.6576	26.5543	25.9367	24.8706	25.749	24.9626	26.4208	26.4187	25.5644	25.3796	25.4757	26.262
MA-00139-325	20.5416	26.1864	26.1474	25.6689	25.9161	25.9089	25.6062	25.702	26.5186	25.8693	25.8397	25.3258	24.7217	24.4002	25.7836	25.3983	24.525	24.8098	25.5949
MA-00055-71	20.4962	27.2147	26.5369	26.2948	27.5412	27.0382	27.2557	26.312	27.2646	26.3137	26.5955	28.0053	27.6089	27.9492	27.8014	28.2727	26.5647	27.4436	27.4058
MA-00182-226	20.4859	26.5438	26.435	26.3335	26.961	25.9077	25.7117	25.5248	25.5513	25.3928	25.0091	25.5627	25.0852	25.9475	25.8865	25.2951	25.3728	25.0126	26.0049
MA-00326-101	20.4726	27.3619	27.8198	26.9617	26.7352	26.7596	27.428	28.1264	27.7206	27.6771	28.4716	28.1494	27.9857	27.9061	27.4587	27.594	27.7688	27.8809	28.2371
MA-00189-165	20.4535	23.7905	26.1664	24.3211	25.6423	24.4684	26.0187	25.4339	26.6027	25.6283	25.3551	25.6136	26.5805	24.0352	25.3688	25.7362	24.1742	26.5735	25.9279
MA-00165-8	20.4414	24.0802	24.6852	24.1849	25.0317	22.0329	22.68	23.854	25.4554	24.5947	24.8159	24.6135	25.1247	26.023	25.4901	22.627	24.2098	24.1764	25.2787
MA-00090-385	20.4358	25.8225	26.0236	24.3873	26.3331	26.7972	25.7624	25.693	25.9839	24.7101	25.8696	23.0956	25.3964	25.3623	25.3718	24.9197	25.0707	23.587	25.2203
MA-00073-144	20.415	29.884	29.3498	28.119	30.3615	29.6911	29.819	29.4341	29.7424	29.513	31.12	29.9044	30.0652	30.0799	30.1687	29.7587	29.1981	29.3384	29.4144
MA-00055-323	20.3979	28.8942	28.9049	28.0596	29.1541	29.0427	29.1375	29.2675	29.68	29.5602	29.6639	29.8806	29.6879	29.995	29.5632	29.6205	29.2551	29.1292	29.5193
MA-00184-379	20.3849	30.5506	30.5121	30.1887	30.7849	30.6135	30.9347	30.9061	31.0268	31.1793	31.3854	31.3095	31.3633	31.4912	31.4494	31.4069	31.2421	31.2177	31.5252
MA-00120-158	20.3558	24.307	24.3796	24.9918	25.184	24.4677	24.6774	24.2026	23.5634	24.9003	24.0465	24.609	23.3184	25.25	23.2148	25.5505	25.1074	24.9606	25.8671
MA-00101-611	20.3421	26.077	26.1299	26.1741	26.1889	25.9222	25.3965	25.0191	25.9814	25.0285	25.5274	24.5287	25.8466	24.7505	25.247	25.31	23.1901	25.5723	24.5502
MA-00162-25	20.3396	24.8724	26.526	26.5064	26.5912	26.9457	26.8708	27.2229	27.4865	26.7326	27.4492	26.1813	26.4377	26.4335	27.0743	27.2676	27.559	27.1857	27.3815
MA-00297-554	20.2949	28.3234	28.7489	28.0837	29.1169	28.7998	29.1593	28.9629	29.6949	28.9409	29.4662	29.4021	29.5958	29.482	29.622	29.3814	29.4044	28.8516	29.377
MA-00189-355	20.2757	29.0372	29.558	28.3636	29.4391	29.3114	29.6346	28.5335	29.3437	29.5966	29.7879	29.8656	30.5013	29.5515	30.4621	29.7094	28.8756	29.9539	29.4979
MA-00189-15	20.2666	24.0912	24.9037	25.887	24.8994	23.5828	23.3965	23.0996	23.6831	23.4702	23.3553	24.7743	24.1335	23.9937	24.5569	24.4345	23.9107	23.9272	24.4746
MA-00320-106	20.2032	24.0701	24.0664	23.0349	24.2164	24.3424	24.1735	25.0107	24.3846	24.8148	25.15	24.6322	24.7556	24.9973	25.0112	24.8909	24.1926	25.3351	24.4456
MA-00334-498	20.163	25.9081	24.5398	25.6267	25.8338	24.986	25.8693	25.3078	25.1497	25.6854	25.1479	24.8582	26.1991	25.6067	23.9739	24.539	24.0143	24.5471	25.0987
MA-00073-371	20.1342	24.9564	25.6876	24.7488	24.4275	24.3426	24.7216	24.3227	25.1235	23.9841	24.4322	23.9816	24.6819	24.4716	24.4965	23.7987	23.628	24.0989	23.7319
MA-00297-219	20.1292	23.1909	23.2835	22.7192	22.2276	22.3351	22.2667	22.7462	23.0858	23.1512	22.4491	22.0826	22.271	22.2979	22.4648	22.1923	22.0445	22.1996	21.983
MA-00139-254	20.1291	27.6146	27.1959	26.5182	27.8073	28.4042	28.2682	27.6021	28.4369	28.5526	27.6263	28.3449	28.1316	28.9891	28.0266	28.1066	28.5416	28.3335	29.1338
MA-00090-484	20.0897	28.4657	28.6033	27.8781	28.7627	30.3072	24.2908	27.4138	29.0593	27.9304	28.6921	29.135	27.6905	29.1244	24.5031	25.1727	28.4329	29.354	28.6655
MA-00162-259	20.049	29.9818	29.8832	29.6602	30.5841	30.099	30.6012	30.555	30.9259	30.5462	30.8753	30.9944	30.9747	30.823	31.0479	30.7791	30.7109	31.0393	30.8965
MA-00112-32	20.0389	25.876	24.493	25.0877	24.9768	24.4975	25.016	24.2292	24.2569	25.2761	23.7647	25.8681	25.4316	24.4927	26.0903	25.0127	26.0405	25.4251	26.1184
MA-00184-240	20.0063	25.3546	25.9831	24.9349	26.1152	26.1645	26.3373	24.5835	25.1539	25.0594	24.9626	25.1264	25.7938	26.0464	25.9616	25.5341	26.235	24.8923	26.498
MA-00153-464	19.9903	27.8058	28.1449	27.7982	28.4987	28.5308	28.5259	30.1636	27.8519	28.1318	26.8053	27.4921	27.4364	30.6939	27.3382	27.7818	26.2187	27.1868	29.4144
MA-00073-618	19.9592	30.7716	31.2433	30.6892	31.5224	30.4784	30.8772	29.8701	30.5154	29.7939	30.1255	29.9123	30.1577	30.6839	30.2268	29.9256	29.7136	30.1204	30.5314
MA-00153-665	19.9453	28.5156	28.8964	27.1045	29.6971	29.3906	29.6337	29.0825	29.7363	29.4803	28.7335	29.6583	29.2125	29.5324	29.4516	29.2625	30.5296	30.1586	31.0032
MA-00213-90	19.9232	24.6163	24.314	24.5161	24.4477	24.2177	24.0655	24.1661	23.2778	23.7898	23.3243	23.2172	23.4777	23.7173	24.2087	23.9637	23.2088	23.1745	24.0427
MA-00067-34	19.8856	24.2184	24.4092	26.6139	26.7135	26.8375	26.454	26.0506	25.1176	26.4219	27.1309	25.257	26.7175	26.5679	25.4308	26.894	26.3545	26.2236	27.3709
MA-00072-79	19.872	25.308	24.1615	25.2122	24.9813	26.4688	25.7049	25.0474	25.1954	24.5121	25.7235	23.2051	23.5884	24.2157	25.1195	24.0571	24.2772	25	23.2118
MA-00153-36	19.864	23.5639	24.2508	22.7827	24.448	23.1862	23.5347	24.0759	24.4549	24.2565	25.1315	24.5057	24.1985	24.5617	24.3368	23.8711	23.9854	24.6617	24.5877
MA-00184-71	19.853	23.921	21.9679	22.4276	22.7172	22.1438	22.8415	21.5748	20.9403	23.29	22.8943	23.2231	22.6881	22.4162	22.366	23.4017	21.2944	18.6697	21.9252
MA-00120-111	19.8359	23.9395	25.4855	25.1019	26.2835	25.3157	26.3099	25.706	25.3617	25.6221	25.6664	26.2251	26.9036	25.0398	25.4615	25.1608	25.0428	25.3052	26.411
MA-00320-166	19.8338	26.7253	26.5435	25.9258	25.5341	26.2955	26.2283	25.5	24.0842	25.9022	25.6427	26.1672	26.3453	26.7009	26.3321	26.4818	24.6643	23.966	25.5812
MA-00320-190	19.8175	22.5943	23.6025	23.9331	25.3286	24.3604	24.9117	25.231	25.6677	24.0148	25.9509	23.5189	25.4685	24.4268	23.4814	24.1625	22.1383	23.2491	24.9895
MA-00153-234	19.7838	23.4478	23.9261	22.8224	22.424	24.1053	23.153	22.2169	23.9031	22.5659	22.4773	23.2859	23.2209	23.9717	23.7437	23.7643	22.5448	22.1551	22.7629
MA-00073-480	19.7349	28.6449	28.8621	28.7118	29.1571	28.5498	28.9747	28.375	28.5525	28.3562	28.5928	28.0317	28.2117	28.6954	28.5157	28.1956	27.5631	27.8774	27.4049
MA-00120-610	19.7041	26.7977	26.1478	24.9157	27.0654	25.0106	24.0745	24.4592	25.4499	24.9227	23.4092	23.576	24.4811	26.832	23.4335	24.4926	24.5124	25.4748	25.1115
MA-00320-180	19.6828	30.5009	30.2649	29.9546	30.3126	29.7116	30.491	29.6748	30.2008	29.7824	29.1092	29.3832	29.4404	30.1483	29.5634	29.4693	29.7392	28.7329	29.5098
MA-00073-261	19.6607	24.5553	23.3348	23.9462	25.5086	22.9382	23.8565	23.2687	22.914	23.9665	24.2555	24.7722	21.5971	21.4012	24.2422	23.6616	25.428	23.9965	24.9243
MA-00189-403	19.6105	29.588	29.8802	29.4892	30.463	29.7225	30.1327	30.1236	30.3548	30.2498	30.5488	30.5484	30.7042	30.8999	30.5109	30.3182	30.5318	30.7063	30.9842
MA-00120-151	19.5489	28.3543	28.6641	28.1277	27.7057	27.5036	28.0519	26.8484	27.6366	27.7434	27.3965	26.9778	27.2687	28.0346	27.6879	27.6638	26.8387	26.3732	27.5042
MA-00320-6	19.533	23.0895	24.3703	23.8826	24.8416	24.1974	23.7978	25.4458	22.4004	22.7832	26.3909	22.9391	25.0779	25.246	24.4386	26.5626	24.1013	23.9244	24.044
MA-00120-277	19.527	25.9682	27.0676	26.3756	24.9095	26.1928	26.619	24.6159	26.2187	25.7405	25.582	25.4016	25.5083	25.6982	24.9576	26.1476	25.1935	24.143	25.2634
MA-00334-189	19.506	23.867	23.5638	23.8836	24.1844	24.0242	23.5622	23.2541	24.6663	24.1218	24.4815	24.1966	24.3597	24.1142	25.5157	24.4987	24.3017	24.8675	25.3046
MA-00067-15	19.479	22.0667	23.1031	22.0123	22.9523	22.3389	23.1749	22.2569	21.4972	22.381	22.2382	22.0353	22.1846	22.2283	22.6164	21.9555	20.4776	22.3912	21.0137
MA-00073-146	19.4421	27.7759	27.9607	27.4668	28.6484	27.7674	28.1104	27.403	28.2254	27.8244	28.0816	28.2692	28.526	26.9967	28.2838	27.3134	26.8168	27.111	27.3901
MA-00162-344	19.4248	28.8474	28.9996	27.7516	29.2739	28.646	29.1838	30.0525	29.449	29.6628	30.0084	29.4065	29.3839	29.4245	29.4338	29.3814	28.726	28.9809	29.3325
MA-00173-83	19.3989	23.4939	21.782	22.3983	21.8797	23.2037	22.9789	21.7186	21.7738	22.7584	21.9832	21.3847	22.4112	22.4093	22.1646	24.1721	21.433	22.2156	22.0052
MA-00213-570	19.3873	27.4554	27.0929	27.0171	27.0428	27.1754	27.8094	27.1922	27.738	27.2533	26.4011	26.8022	25.6717	27.4901	27.4339	26.9989	26.3533	26.8846	27.2028
MA-00189-458	19.3649	23.1943	23.2174	22.3778	20.9193	22.825	23.3136	21.7953	22.4786	22.3478	22.1329	22.1339	22.0026	22.6228	22.3956	21.9004	21.5787	21.57	21.4846
MA-00184-10	19.3547	25.4973	26.2954	25.4314	25.5464	25.8425	25.3695	24.4756	24.9102	24.5169	24.9476	24.6629	24.8832	26.1129	26.3822	24.8006	24.7041	24.553	25.1914
MA-00303-7	19.3427	34.7302	34.87	34.4209	34.7897	34.7099	35.0142	35.0101	35.3336	35.2479	35.5062	35.5498	35.6576	35.5121	35.6682	35.5726	35.0225	34.5296	35.099
MA-00055-229	19.3235	26.5873	27.7655	25.8116	28.0236	27.3248	28.0291	22.8991	26.0805	26.2505	27.1284	26.745	26.7178	27.9702	27.2814	26.6668	26.9625	26.3124	27.8794
MA-00153-230	19.3159	27.3827	26.7423	27.0594	25.8753	26.8805	27.3523	27.0074	27.2464	27.454	27.3128	26.5665	26.8421	27.5797	26.0945	25.7841	25.9786	25.9117	26.4325
MA-00073-612	19.3073	26.7912	25.3076	25.2731	26.7664	26.2668	26.0787	26.9955	27.5164	26.6068	26.1484	26.3138	26.7239	26.4315	26.8298	26.5727	25.9332	26.149	25.4407
MA-00189-415	19.2815	23.8629	24.1429	24.3702	23.6927	23.1946	23.8511	23.5561	24.0911	24.0107	24.4767	23.6534	25.2419	25.0695	25.1906	23.7002	23.7809	24.2832	24.9059
MA-00101-286	19.2163	29.5453	29.9035	29.2171	30.2582	29.7599	30.3913	29.5854	30.0581	30.0405	30.2868	30.0728	29.8294	29.8001	29.9548	29.8379	28.9011	28.8015	29.3794
MA-00073-355	19.181	29.6107	29.4719	28.7651	29.1247	28.6733	29.4236	28.3841	28.2047	28.2787	28.3427	28.5529	28.2399	29.2959	29.2015	28.8288	28.8849	28.8703	29.0061
MA-00073-611	19.1512	31.3037	31.6114	31.1783	31.4562	31.0571	31.4013	30.7261	31.1399	30.5288	30.6516	30.6681	30.6762	31.015	30.505	30.4112	30.0887	30.221	30.7613
MA-00182-126	19.1204	26.3271	25.2135	25.6048	26.2282	26.7483	26.2268	26.1012	26.4274	25.5487	26.5609	26.7269	26.5367	27.0783	26.9753	26.4644	26.5636	26.2367	26.8664
MA-00101-43	19.0673	26.9747	26.8615	25.5485	27.1954	26.8154	26.1252	27.1571	26.8252	25.092	27.173	25.9022	26.5515	27.5936	26.7539	26.2992	24.7516	24.7811	25.9163
MA-00101-147	19.0204	24.6166	24.5801	22.0495	25.0878	23.9849	22.3373	25.6977	24.7004	24.8632	24.1441	24.3106	25.8287	24.3158	23.697	24.2104	24.4736	23.9903	24.1334
MA-00090-300	19.0086	24.7467	26.5918	26.2146	25.8752	24.9491	26.3493	25.3839	24.3209	26.0988	25.8537	23.0299	25.6333	25.2516	25.4341	25.3757	23.2881	24.438	25.985
MA-00153-44	18.997	25.253	24.5648	24.0131	24.6664	25.3129	24.1797	23.6354	24.5104	22.9871	24.5707	24.3886	23.591	24.7456	25.3773	23.7666	23.8699	24.0103	23.8171
MA-00101-598	18.9651	29.0059	28.662	28.0964	29.5568	28.2762	29.0619	28.2677	29.2608	28.7942	28.1344	27.6858	28.3856	28.2914	28.3726	28.5462	27.4725	27.8978	28.1736
MA-00334-257	18.8267	27.8134	27.9286	27.6909	26.7144	27.3302	27.5144	26.7086	27.1874	26.5915	26.6029	26.8495	26.5995	27.3571	26.9671	27.077	26.8519	26.8167	27.1583
MA-00220-1	18.776	32.5079	32.1544	31.6112	32.7762	31.781	32.1597	32.1483	32.5349	32.3093	31.3977	31.6477	31.7507	31.7618	31.5754	31.4484	31.5	31.1421	31.5168
MA-00072-282	18.7098	31.9987	32.0672	32.0751	31.9513	31.785	31.9453	31.0003	31.1787	31.3196	31.3524	31.0069	31.2396	31.4155	31.2791	31.2166	31.1371	31.2242	31.5237
MA-00326-166	18.697	25.4111	25.2145	25.5592	25.9141	25.3904	25.9885	25.922	26.5588	26.0532	26.486	26.3775	26.4604	26.6678	25.964	26.3025	25.7278	25.5601	26.0163
MA-00153-161	18.696	27.872	28.1022	27.9414	27.7993	28.0371	28.2848	27.1112	28.2118	27.0679	26.8855	27.2462	27.6765	28.2477	27.6562	27.4371	27.2239	25.9871	27.4348
MA-00189-323	18.6884	31.5613	31.6406	31.0415	31.7607	31.375	31.6575	31.2489	31.8083	31.5844	32.1432	32.1488	32.2703	32.4417	32.2869	32.1699	32.0419	32.04	32.4995
MA-00073-256	18.6277	26.1934	27.0565	26.3856	26.921	26.5192	27.3541	26.0643	26.2291	26.3367	26.642	26.2075	26.8872	26.9393	26.5458	26.0852	25.7743	24.71	26.5202
MA-00067-161	18.582	25.7221	24.7415	26.0819	24.7984	25.0328	26.1386	25.6604	24.4702	25.7414	25.3425	23.9099	24.6344	24.9873	25.0646	25.2096	24.2581	24.0764	24.6167
MA-00210-67	18.5751	28.2535	28.9653	27.9324	28.9313	28.302	28.4787	28.2655	28.6357	27.8796	28.9248	28.9502	28.9759	29.2294	29.2969	29.3546	29.2869	29.3511	29.6769
MA-00297-514	18.5662	21.8336	21.6882	20.7442	21.1827	20.6743	19.4487	21.6854	22.4201	21.7699	22.3738	21.1197	21.7302	21.97	21.3645	21.5365	21.0836	21.5876	20.7917
MA-00297-281	18.5653	31.13	31.2004	30.8258	31.5569	31.3048	31.6222	31.4381	31.753	31.7551	32.0396	32.0511	31.9699	32.1284	31.9574	32.0435	31.8003	31.9159	32.0936
MA-00268-14	18.5499	23.635	23.4045	22.8366	22.698	22.9689	23.3936	22.3497	22.7895	22.8493	22.3265	22.7566	22.3133	22.0807	22.3887	23.12	22.2491	22.0775	22.1844
MA-00055-169	18.4724	27.7966	28.5501	27.7784	27.3265	27.861	27.5765	26.5462	26.6549	27.4924	26.7612	25.9656	27.3152	27.3826	26.6462	26.8994	26.3417	26.5582	26.8921
MA-00112-37	18.3756	28.7275	29.1067	27.7058	28.855	27.982	28.9728	28.0294	28.5003	28.4132	27.2074	28.5104	28.136	30.0184	29.969	28.4349	29.0253	28.7764	29.274
MA-00112-135	18.3632	30.3898	30.7458	30.3223	30.9106	30.6299	31.559	29.5321	30.1734	29.9094	30.1696	30.2755	30.4932	30.5754	30.8745	30.3115	30.6333	31.0738	31.1279
MA-00112-181	18.3556	23.2816	20.8872	21.5975	23.324	20.9016	21.2529	20.0031	22.8064	23.0161	20.4497	23.3013	23.1175	24.073	22.3768	22.3291	21.2374	21.6231	22.9664
MA-00334-539	18.338	27.5077	27.7174	26.3289	27.3552	27.3382	27.5186	28.1134	27.5861	28.4125	28.1457	28.0193	28.26	28.5099	28.2748	27.8848	28.1209	27.6863	27.6583
MA-00189-431	18.3306	25.9144	26.2429	25.777	25.8432	24.3448	25.0026	25.0508	25.4316	25.3072	25.2616	21.9488	25.5228	24.9822	24.6407	24.6199	25.0524	24.1628	25.281
MA-00190-86	18.2387	24.1669	25.0987	22.9401	23.1511	23.3707	23.8083	23.3547	22.2689	23.8957	23.5039	21.7498	22.9678	23.3374	22.637	24.2218	22.5931	22.8168	22.6964
MA-00090-514	18.2283	27.9172	28.9165	28.3438	28.7402	28.7944	28.5457	27.9226	27.9454	28.1241	27.5287	27.7895	27.8843	27.7677	27.6186	27.6107	28.0762	27.7853	28.0646
MA-00184-148	18.2222	26.8964	26.7491	27.0503	27.7533	27.4068	27.5434	27.2022	27.4129	26.6168	27.2125	28.1246	27.414	28.09	27.5619	28.3345	27.3043	27.2312	27.4367
MA-00139-181	18.2171	23.134	23.9287	22.7204	24.0426	23.3749	23.7998	22.6682	23.4042	23.054	23.2497	22.9679	22.6116	22.9588	22.8986	22.4103	22.1975	22.6496	23.1763
MA-00326-117	18.2042	26.9844	27.3546	26.7037	27.9208	28.1885	27.867	27.698	27.9099	27.7857	27.7421	28.3648	27.5945	27.9518	27.9537	28.0427	27.7835	26.3934	28.1455
MA-00112-278	18.2042	29.8935	29.9464	29.7803	29.9735	29.5024	29.7466	29.2486	29.4163	29.5777	29.1818	29.2366	29.308	29.1942	28.9463	28.9495	28.6391	28.9433	29.1112
MA-00297-512	18.1728	24.0141	23.4439	23.8511	24.4452	24.6011	24.6247	23.447	24.2826	22.4657	23.6773	23.2591	24.289	25.4123	23.8044	23.5285	23.4543	23.9501	23.6023
MA-00323-45	18.1304	25.6872	25.2027	24.9288	25.9193	25.7885	26.5525	25.9977	25.8258	26.3479	25.5417	24.98	25.3576	26.1152	25.8392	25.6346	26.2922	26.3486	26.73
MA-00189-360	18.1182	23.0553	24.7876	23.5488	24.7386	24.0514	24.6628	23.8552	23.7561	24.0359	23.5385	23.4736	24.9026	24.3811	23.6748	24.4978	24.7049	25.4862	24.6921
MA-00213-363	18.1125	27.3747	27.8519	27.5637	27.4668	26.4606	28.0583	28.0923	28.0759	27.8511	28.0753	28.1548	28.4327	28.9856	28.2675	28.3493	28.0631	27.6956	27.9321
MA-00101-484	18.1026	22.6523	22.5567	22.6803	22.3996	22.7938	22.8207	22.9227	23.1025	22.5193	23.629	23.7666	23.4594	23.2832	23.4636	23.023	22.417	22.7127	23.525
MA-00073-13	18.0754	26.2427	26.6217	25.539	26.7657	27.0703	26.8463	26.558	27.6619	27.3198	27.1044	27.3852	27.3553	26.806	27.4993	26.8044	27.5132	27.6343	27.9205
MA-00101-482	18.0004	28.4584	28.953	28.2067	28.8642	28.1945	28.8139	27.5679	27.7471	28.5451	27.5045	27.7846	28.2605	27.7729	27.8741	27.9796	26.9659	27.3115	27.8757
MA-00055-285	17.9817	29.3569	29.2155	28.5594	28.9765	29.1176	29.1545	28.6789	29.1693	29.0224	28.8484	28.6602	28.8409	29.1799	29.0906	28.5118	27.4697	28.418	27.7503
MA-00090-213	17.9401	34.3633	34.1753	33.9763	34.5002	33.8328	34.6143	33.715	34.1679	33.9848	33.3033	33.6198	33.4209	33.6307	33.7252	33.7047	33.3436	33.1113	33.5641
MA-00213-301	17.9118	26.6296	25.7267	25.6592	26.6224	25.6906	26.6695	25.7627	26.0357	26.1759	25.9253	25.6746	24.3529	26.0648	24.895	26.4672	25.3651	25.2644	22.9099
MA-00184-425	17.9035	25.1137	24.6277	24.1578	25.3502	25.6396	25.1972	24.7115	24.8334	24.9309	23.8696	23.8503	24.8917	25.7798	25.0435	25.0216	24.8868	24.6032	25.21
MA-00323-17	17.889	23.607	25.25	24.4008	24.2493	22.9413	24.4432	23.765	23.0441	22.8598	23.0152	23.4251	23.6577	23.5039	22.3217	24.2087	23.3107	24.2338	23.5934
MA-00090-249	17.8864	24.898	24.7156	23.0366	24.9189	24.5024	25.0181	23.7239	24.8012	24.2529	24.6672	24.138	24.447	25.606	25.0309	25.2484	25.7158	24.7347	26.4134
MA-00153-520	17.8752	30.9769	31.3322	30.7453	30.9046	30.7336	31.0444	29.782	30.2991	30.0456	30.1591	30.3996	30.1565	30.2773	30.4481	30.2742	30.1908	30.3279	30.651
MA-00297-479	17.8698	23.9785	24.6765	24.3064	24.9573	25.1807	24.2826	23.3631	24.3834	24.9746	24.9017	23.4082	23.3915	24.1095	25.1187	23.9793	23.4002	24.3492	23.3228
MA-00320-42	17.8685	24.3401	24.035	25.4037	25.7796	26.0449	25.101	23.9177	25.3649	23.9267	24.2422	25.9762	24.7551	24.6876	24.2223	25.2422	24.3436	25.2608	24.5614
MA-00120-88	17.8595	32.4823	32.8297	31.9713	32.5997	32.3041	32.673	31.5905	32.7333	31.7252	31.8755	31.7839	31.7895	31.9503	31.9559	31.6758	31.3742	31.3723	31.7632
MA-00090-308	17.8553	28.7044	29.1801	28.6033	29.5374	29.3316	29.4781	28.8995	28.8069	28.8269	28.6899	28.5559	28.5405	28.8764	28.8952	28.5276	27.8852	28.0818	28.6957
MA-00334-206	17.8489	28.8916	29.1714	28.6892	28.9713	28.7227	29.3023	27.8997	28.352	28.4996	28.293	28.4637	28.3465	28.5566	28.0261	28.4201	27.9652	27.7297	28.3856
MA-00326-11	17.8483	23.7314	24.062	23.5893	23.0921	23.8008	23.3598	23.3097	24.4752	23.8063	24.0922	24.3017	24.6473	24.3646	24.51	24.3583	23.6649	23.3344	24.1605
MA-00184-166	17.8283	28.9325	28.9017	28.8044	29.6638	29.1884	29.1706	27.5156	28.121	28.4709	28.362	28.4618	28.7182	29.9224	30.2062	28.0973	29.3508	29.0377	29.5705
MA-00297-18	17.8144	25.3321	26.8446	25.9503	26.509	25.5155	28.3408	25.4826	25.4235	25.1598	25.5833	25.039	26.2153	25.7579	27.4379	26.9133	25.5086	26.0637	26.4776
MA-00090-504	17.789	24.1997	23.8968	23.8706	24.3863	24.888	24.8369	23.9774	25.676	24.0924	24.0846	23.3992	24.4092	25.2341	24.5153	25.0074	24.0203	25.2532	24.2669
MA-00067-191	17.7786	29.8342	29.8194	29.6216	30.1728	29.6037	30.1443	29.94	30.4699	29.995	30.5875	30.4803	30.6624	30.8192	30.6735	30.4104	30.6092	29.9756	31.2151
MA-00090-95	17.7727	24.5628	25.5882	24.4981	25.7617	25.2836	25.4437	24.6007	25.2056	25.2335	24.9857	25.3013	24.9438	25.1106	22.8956	24.7332	24.7616	25.5251	26.8206
MA-00326-186	17.7716	21.721	23.5628	23.8081	23.6338	21.7637	23.5381	22.2212	22.7863	24.0605	24.3901	23.4223	21.9717	23.9949	24.9973	22.361	23.5451	23.8117	24.6066
MA-00184-371	17.7606	29.0868	29.0853	28.9058	29.1722	29.0276	27.321	26.5056	28.5354	28.6041	28.2179	28.6602	26.5206	26.9486	28.687	27.8765	28.1492	27.9638	28.711
MA-00101-677	17.7149	26.6838	26.3049	26.2172	26.3441	26.8764	26.4104	26.1603	25.911	26.2579	26.0956	24.2233	24.0857	26.5018	25.0655	26.0933	25.897	26.0025	24.8749
MA-00184-357	17.7041	27.7407	27.7833	27.2619	27.2972	27.5278	27.4533	27.1371	27.1437	27.2395	26.7582	26.8649	27.224	26.8359	26.9824	27.1861	25.4617	24.1078	26.4357
MA-00073-294	17.6858	25.1395	24.2228	24.4398	23.6343	24.3494	24.6943	23.7594	23.8041	23.4871	23.952	24.3022	23.7126	25.1889	24.8598	24.3865	23.969	24.4933	24.7065
MA-00334-380	17.5662	23.4651	23.7333	21.7952	22.8814	22.5406	23.085	23.6934	22.0101	22.3556	21.7094	21.953	22.6775	22.5496	22.8138	21.7877	21.5848	22.1096	21.6529
MA-00112-350	17.5594	26.1454	25.1524	26.8733	26.4821	25.8931	25.1739	24.1546	25.5791	25.4863	24.8311	24.7732	24.9347	24.8736	25.9853	24.4617	25.0949	24.8801	25.9186
MA-00038-1	17.5575	26.5495	26.3965	26.8467	27.0365	26.0781	26.9166	26.2326	26.4715	25.7149	25.2419	25.6687	25.7045	26.6218	25.6761	26.2564	25.7328	25.4936	26.7332
MA-00326-99	17.545	29.3225	29.3597	29.0749	30.5303	29.4057	29.6321	29.1515	29.4285	29.2288	28.7811	28.6765	29.0894	29.0359	28.6836	28.8729	28.5583	28.7724	28.5748
MA-00055-33	17.5287	30.5711	30.3554	30.1908	30.5567	30.1975	30.6285	30.4325	30.5782	30.4696	30.7064	30.5298	30.5586	31.0638	31.5896	30.5171	31.3284	30.887	31.7252
MA-00297-61	17.4983	28.3661	28.4963	28.0976	28.2584	27.9653	28.8556	27.7819	28.0604	27.4485	27.0808	28.0568	27.6721	27.619	27.9918	27.6355	27.5216	27.2035	27.4205
MA-00213-380	17.4779	20.8913	20.491	22.1143	22.4763	20.1893	21.3618	20.8613	19.4214	20.6841	21.4622	21.77	21.1401	21.4911	21.2547	21.4925	21.223	21.6837	21.0857
MA-00073-492	17.4422	25.8234	27.4029	26.4352	26.9248	26.6505	27.2054	26.2814	26.2811	26.7623	27.5902	27.4262	27.2909	27.6745	27.1217	26.4697	27.2646	27.179	27.7715
MA-00153-304	17.4388	26.6632	27.5032	27.3408	27.6581	27.6411	28.0544	28.3573	28.1747	27.3259	26.7852	27.3388	27.5544	27.6616	26.7849	27.3	26.1549	25.1362	27.3579
MA-00101-211	17.4059	28.3514	28.9342	27.7108	28.9858	28.8174	29.0407	28.2638	28.779	27.8059	28.0719	28.0599	27.6824	28.3829	27.9315	27.901	28.1503	27.2083	28.5332
MA-00139-200	17.3627	23.5747	24.0174	22.9773	23.3506	24.0367	23.4603	22.5118	22.1509	23.146	23.4828	23.417	23.5221	24.7674	24.4247	22.6725	23.7048	23.916	24.1037
MA-00073-72	17.3523	24.9857	26.1623	25.6495	25.2539	25.1411	25.2919	24.645	24.2536	24.5546	24.1111	24.9122	24.8172	25.1567	24.6921	24.754	24.3252	24.3706	25.5216
MA-00184-243	17.3472	22.1959	22.7108	23.5649	22.3219	22.2938	22.5227	21.9437	21.7952	22.1726	21.8319	21.6873	21.6115	21.48	21.626	22.3034	21.5741	21.8338	24.283
MA-00153-598	17.3178	29.4366	29.5547	28.8267	28.6207	29.0758	29.0157	28.322	28.5582	28.4287	29.2017	28.4996	27.6013	28.5165	28.5436	28.2074	28.0894	27.8213	28.4431
MA-00297-209	17.3116	24.0162	23.9585	24.1637	24.2024	23.6544	23.2218	22.536	23.4105	22.7762	22.931	23.496	23.3756	24.2628	23.8901	22.7486	24.0825	24.4682	23.1492
MA-00210-49	17.2994	30.3103	30.6602	30.3778	30.5419	30.1679	30.6247	29.8487	30.1361	30.2061	29.9117	29.7314	29.9798	29.9814	29.5755	29.8625	29.4631	29.2525	29.6981
MA-00153-569	17.2977	25.3557	24.5995	25.3033	25.6642	23.9804	25.1636	23.9713	24.4605	22.0729	25.6866	24.4986	23.6059	25.2493	25.0014	24.298	21.9201	23.9245	26.4129
MA-00189-425	17.2749	32.4919	32.428	32.3854	34.0832	33.0162	33.1567	33.0923	33.3568	33.2048	33.2619	33.5641	33.5062	33.5754	33.3436	33.0434	32.9136	33.6198	33.3698
MA-00320-89	17.2706	26.9591	27.0554	26.3339	27.1683	27.0136	27.0703	26.8259	26.3907	26.3184	27.5284	27.3787	27.365	26.5747	26.7123	26.7821	26.5526	25.6582	26.8819
MA-00334-382	17.2666	30.2521	30.6088	30.1361	30.6485	30.4532	30.9201	30.6271	30.964	30.9833	31.1224	30.9841	31.1577	31.1374	31.2449	30.969	31.3497	31.2824	31.712
MA-00317-40	17.2275	24.5986	23.2235	22.0275	24.9574	24.9611	24.6641	24.8293	23.6341	25.7475	23.9329	25.0731	25.7872	24.1044	25.3899	24.8305	25.1924	24.6399	26.1102
MA-00184-248	17.2027	25.6625	26.2343	24.059	25.5995	25.201	26.8799	26.1966	26.529	26.0403	26.2366	26.905	26.1917	25.7808	24.4796	25.3047	25.8769	25.0688	27.407
MA-00270-32	17.1955	26.2427	26.7868	23.8855	25.3393	25.6033	26.3568	24.6738	25.7444	25.6108	25.1322	25.3811	24.3528	25.2123	25.2621	25.4527	23.8583	26.1198	23.6486
MA-00184-253	17.1729	26.6546	26.7752	26.3054	26.1044	26.5285	27.048	26.7647	26.5044	26.6891	26.2155	25.9688	26.2664	26.164	25.9747	26.0413	25.5272	25.1882	26.0843
MA-00334-178	17.1511	24.2219	25.0645	24.0649	23.9261	24.5813	23.8281	23.7138	24.0725	23.1613	23.2256	23.6282	23.1377	23.8309	23.4342	23.2797	23.3853	22.946	24.0208
MA-00072-82	17.1464	23.8377	23.5614	24.0825	23.8812	23.316	23.3707	23.8172	23.9204	23.0029	22.6166	22.1384	23.1371	23.1077	23.5173	23.5949	23.3668	23.711	23.4695
MA-00112-320	17.1454	25.2625	25.9693	24.6454	26.2281	25.9144	26.7428	25.0846	26.5645	26.2544	25.5562	25.7222	25.9449	26.5318	26.7037	25.8056	25.3511	25.742	26.2665
MA-00210-149	17.14	24.3464	25.2173	24.5596	24.6698	24.0464	23.9206	24.6355	24.6892	24.9514	24.9326	25.075	25.3486	24.917	24.4921	24.9294	25.179	26.0647	25.5472
MA-00182-164	17.0999	23.8142	23.5334	21.3015	23.7335	22.8159	23.6744	22.5776	22.5684	22.707	23.2981	22.761	23.2211	24.7692	23.1011	23.1915	21.4663	22.1555	21.8339
MA-00182-192	17.0666	24.5532	25.9593	23.814	25.1809	23.335	24.12	23.6305	24.2299	23.7351	23.6496	24.726	23.9726	24.7186	24.4597	24.1285	24.0469	23.6072	22.9883
MA-00320-39	17.0639	25.0683	25.002	23.3141	24.7841	25.1353	24.713	22.4658	22.0013	26.9062	26.5307	23.8098	22.8445	23.9602	26.0885	23.2631	22.3259	24.4824	23.9828
MA-00213-257	17.0446	27.061	27.5266	27.0168	27.1765	27.0849	23.6072	25.3473	27.1137	26.5139	26.7061	26.4434	27.3037	27.5236	26.8571	25.705	25.3795	26.6409	25.6383
MA-00073-68	17.0375	23.7103	24.021	23.4257	24.8122	24.6087	24.3064	23.2533	23.376	23.7026	23.7487	23.1797	24.6599	24.5393	25.3811	23.6725	23.7307	23.9322	24.1829
MA-00320-95	17.0258	28.3636	27.7936	27.7263	27.9401	26.6484	27.0994	26.9103	26.9683	27.2073	27.044	26.2413	27.0307	27.1378	27.3161	27.9678	26.6929	27.212	27.7188
MA-00210-76	17.0116	24.3324	24.3808	24.3408	24.331	24.3679	24.4465	23.3786	23.9869	23.59	23.4227	23.7745	23.188	23.5493	23.9231	23.4806	23.9737	23.49	24.1957
MA-00139-101	16.9805	35.6602	35.7528	35.3633	35.9417	35.8305	36.0142	36.1377	36.5165	36.2425	35.9264	35.9439	36.0389	35.9656	35.7628	35.7252	35.1679	35.1068	35.2689
MA-00189-237	16.9654	29.4139	29.646	28.9691	28.9028	28.6477	28.8755	28.295	28.2139	28.3078	29.0481	28.1766	28.0745	28.9064	28.0353	27.8398	28.5848	28.893	28.8104
MA-00153-718	16.9406	23.8065	23.8231	21.8841	23.7162	23.127	24.1297	23.809	22.893	24.0914	23.7296	22.9058	24.2609	24.3661	24.6453	24.7203	23.7592	25.3511	23.6525
MA-00297-72	16.827	26.7035	27.2936	26.3147	27.76	27.3091	27.4874	26.9944	27.6348	27.4176	27.7526	27.5538	27.7357	28.0572	28.0348	28.1851	26.77	27.5098	27.2632
MA-00067-192	16.7537	25.8586	26.2578	25.8874	25.2952	25.8673	26.2742	25.0794	25.1662	24.5213	25.5374	25.3065	25.0099	25.358	25.079	25.3733	25.0026	25.2011	25.1763
MA-00067-312	16.7498	26.8937	27.5558	27.2359	26.135	26.5886	26.7893	26.6199	26.6606	27.6026	26.9191	27.3665	27.5892	27.5762	27.4091	27.4103	26.4077	25.7884	27.0591
MA-00067-365	16.7475	24.4542	25.6148	22.8989	24.6664	23.9563	24.3478	24.7588	25.3589	24.1052	26.0969	25.7356	24.1381	25.8236	22.5901	24.1709	24.0734	24.558	24.7076
MA-00055-69	16.7447	24.9157	28.213	26.7533	26.6195	27.2806	27.3533	26.9861	25.7157	26.4439	26.9925	26.6862	27.349	26.9312	26.2082	26.5684	25.6632	26.2998	25.5477
MA-00162-144	16.7327	24.3994	24.0953	24.1166	24.096	24.1935	24.7039	24.105	24.141	24.4694	23.3388	23.4073	23.6377	23.7705	23.393	23.9313	23.5975	23.0925	24.5446
MA-00073-295	16.7216	24.542	25.1691	24.237	25.9877	24.2468	26.1299	23.7331	24.8347	24.5775	24.3912	24.0754	24.8067	23.8607	23.4278	25.155	25.9895	24.9118	23.6943
MA-00120-153	16.6818	24.8483	26.1767	23.8922	26.0027	25.0467	24.9287	24.2942	25.812	24.8902	24.3678	23.7659	24.3117	25.5013	24.7553	24.6568	24.215	24.4811	24.8742
MA-00268-79	16.6805	31.7119	31.899	31.3808	32.1483	31.7891	32.2333	31.543	32.0016	31.9191	31.6458	31.6507	31.6251	31.8865	31.6828	31.4024	31.0299	30.6845	31.0645
MA-00073-552	16.6625	24.8341	25.723	24.2598	26.1517	25.5295	26.1096	26.0687	26.0853	26.4444	26.2858	26.4762	26.7774	26.3028	25.7341	25.3975	25.3742	26.1872	26.4191
MA-00162-337	16.6461	25.9215	26.3599	25.6487	26.841	25.917	25.9391	25.8152	25.2865	24.1661	24.3695	26.163	24.9062	25.6779	26.0565	24.2626	24.9616	25.8058	26.4619
MA-00268-57	16.6254	25.7912	26.1114	26.0445	25.9	25.0736	24.6041	25.7963	24.8762	25.3932	25.0234	24.534	25.4808	25.4963	24.9782	25.2195	25.1002	24.4176	24.55
MA-00101-461	16.621	26.1315	26.3445	23.9964	27.0739	24.8238	26.0888	26.3429	26.9068	26.6512	27.0345	26.8917	26.9533	26.8301	27.344	26.7231	26.4623	26.6127	26.4836
MA-00101-419	16.5872	25.2351	24.3789	25.2817	21.9499	24.4227	25.8514	23.9786	24.9629	25.653	24.744	25.4056	25.0714	25.4289	26.4924	24.9882	25.8257	25.8586	26.0861
MA-00210-50	16.5866	27.7624	27.7553	27.288	27.7163	27.3695	27.6899	27.1485	28.0902	27.8534	27.0746	26.7874	27.8086	27.6366	27.6064	26.7688	26.4584	26.6807	26.8445
MA-00210-188	16.577	25.724	26.6611	25.5489	25.8307	26.5471	25.9446	25.293	26.2585	25.7509	24.837	26.4457	25.3073	25.452	25.2193	24.4407	25.9532	25.9339	26.1841
MA-00055-182	16.5726	28.7423	28.6883	27.9601	28.2532	27.8686	28.9896	28.355	28.5371	28.3457	28.7211	28.6721	28.3986	28.4091	27.9682	28.0667	27.2282	27.5216	27.7324
MA-00334-458	16.5713	25.0053	25.6686	25.3604	25.2472	25.8123	25.1567	24.7586	25.4584	25.674	24.7895	23.9145	24.7347	24.8638	24.9815	23.8436	23.8229	25.3695	25.6726
MA-00101-364	16.5589	30.0908	30.4674	30.1569	30.7153	30.5407	30.858	30.7159	30.8829	31.1115	31.1051	31.3391	31.2188	31.0586	31.3388	30.9861	30.7103	30.7992	31.5912
MA-00334-571	16.5464	23.5087	24.0329	23.0235	20.4079	22.0385	24.1471	23.506	23.2838	23.8881	23.3975	23.61	23.2247	24.2656	21.9175	23.7414	19.6362	22.0911	23.0341
MA-00213-428	16.5321	27.4866	27.3268	27.2608	28.0196	27.5538	27.8439	27.3517	27.9702	27.9721	26.9482	27.3022	27.1292	27.7369	27.8457	27.2943	26.0159	26.8018	27.3882
MA-00213-123	16.4597	31.6004	31.7654	31.3092	31.7996	31.2363	31.7561	30.855	30.9387	30.9672	30.8809	30.8524	31.1177	31.0337	30.9267	30.6122	30.4681	30.7321	31.0428
MA-00268-71	16.44	22.2962	24.3116	23.1539	23.6371	23.721	23.3657	21.9867	23.8054	22.1705	23.9542	22.8754	22.6632	22.4405	22.8976	22.69	22.0105	24.093	21.7256
MA-00184-168	16.3984	25.0317	23.7674	24.4741	24.2959	22.7497	23.8205	23.4662	23.2014	23.6377	24.1628	24.31	23.8714	23.9613	23.4342	23.5098	23.6544	24.0293	23.8647
MA-00067-148	16.3136	26.1217	26.4549	25.8256	26.6592	26.4447	26.7536	25.815	26.6216	25.5904	27.8748	26.5063	26.7657	27.1996	27.1675	27.1784	27.0942	26.2439	27.5444
MA-00210-150	16.3087	24.225	22.6445	24.2951	24.5365	24.6065	24.2352	24.5169	24.5709	25.1622	24.8436	24.955	23.9743	24.382	23.9573	23.1111	23.6393	24.2105	24.4423
MA-00139-284	16.3017	26.5014	26.1529	26.191	27.2575	24.4689	27.1525	26.875	25.5343	27.1767	27.4269	26.6745	27.3514	26.8555	27.4953	27.9588	27.6326	24.6676	25.8463
MA-00139-199	16.2893	26.6091	26.6115	26.0383	26.9171	26.5472	27.3437	26.9077	27.1675	27.2628	26.9963	26.1667	27.248	27.6091	27.4089	27.5015	26.6471	26.7412	27.1768
MA-00101-361	16.275	25.9602	25.6339	25.6584	25.7587	25.7953	26.3264	26.6404	26.6561	26.5468	26.7772	26.6357	26.5868	27.0008	27.1461	25.952	26.1591	25.6182	26.6513
MA-00184-393	16.2659	24.0576	24.6505	24.8797	25.1648	24.9445	25.6071	24.4978	24.0952	24.2964	24.9166	23.9787	23.6385	25.759	24.5262	24.2368	24.3387	24.911	25.5325
MA-00073-115	16.2277	28.9252	28.6869	28.0602	29.6197	26.8215	28.4405	27.7372	29.4683	27.9685	28.0279	27.5596	27.4937	27.7904	27.7767	27.7303	27.6676	27.4525	27.932
MA-00182-17	16.216	26.5159	26.0767	25.7977	25.9781	25.8407	24.8849	25.2431	26.4392	25.3457	25.966	24.1235	25.8284	24.9126	25.9785	24.4138	25.3032	25.6729	25.9935
MA-00120-34	16.2126	27.5194	27.2904	26.3401	26.7706	26.673	26.7089	26.1271	25.998	26.3884	26.3562	26.0286	26.088	26.8666	26.3804	25.8525	25.3631	24.7166	26.1975
MA-00320-137	16.1893	25.6176	25.9413	24.7286	24.4902	22.9185	24.0781	23.4197	24.6509	24.3136	23.4294	24.1385	24.4268	22.7475	24.8106	24.3046	24.154	25.1176	24.4338
MA-00101-665	16.12	28.1059	27.9221	27.4447	27.8962	27.386	28.0691	27.0891	27.9563	26.8947	27.5198	27.5881	27.3958	27.4404	27.3329	27.4402	27.0064	26.7172	26.626
MA-00210-165	16.1136	27.2497	27.6103	26.2937	26.7733	26.3598	26.8022	25.98	26.8461	26.8924	27.1987	26.6108	27.4628	27.3435	27.4521	27.45	27.3345	27.1176	27.7852
MA-00334-235	16.0762	26.0329	26.2356	26.0962	26.5891	25.7989	26.4104	25.1675	25.6996	25.4151	26.1234	25.8407	25.9483	25.0943	25.8387	25.7813	27.2144	26.4453	26.7407
MA-00153-337	16.0725	27.3297	27.6579	27.1826	27.7899	27.9296	27.8519	27.3714	27.7664	27.2403	27.6468	27.4875	27.8223	28.0125	27.5444	27.4564	25.9229	27.2629	25.9625
MA-00101-258	16.0496	24.5873	25.1335	24.3815	24.5608	23.7151	24.6401	23.3847	24.2942	24.6234	23.7938	24.1372	24.4116	24.248	25.448	24.7863	23.5484	24.3972	23.3507
MA-00190-53	16.0322	26.7415	27.125	24.8992	26.9485	26.6819	27.0589	25.6943	25.9546	26.1439	26.331	26.5178	26.045	25.4655	26.382	26.3067	25.8295	25.8339	25.8602
MA-00139-389	16.0097	27.6336	27.5728	26.8898	28.2296	27.8302	27.5238	27.7555	28.5428	28.1822	27.6453	27.39	27.6832	27.6841	28.1805	28.0533	28.5895	28.2409	28.8579
MA-00189-178	16.0073	28.9959	28.9203	28.722	29.2505	29.0499	29.1933	28.257	28.5708	28.5508	28.3363	28.4317	28.2771	28.3526	28.5275	28.3228	28.0674	27.8345	28.6513
MA-00120-433	16.0067	27.1146	27.4658	27.2903	27.8749	28.224	28.2012	27.0471	27.301	27.4487	26.6161	27.3571	27.2953	26.6002	27.2454	27.726	27.1602	26.9208	27.7281
MA-00213-128	16.0066	23.5072	23.7231	23.8794	24.816	23.3475	24.0517	23.3808	23.1689	23.4208	23.5504	23.81	25.0087	24.715	23.964	23.3066	23.1906	23.0169	23.6191
MA-00189-96	16.0008	24.3943	24.7616	24.2367	23.4446	23.9753	25.0606	24.4997	24.7841	24.7797	24.3119	24.2144	25.1183	24.711	23.7024	23.6146	23.2673	24.0644	23.7489
MA-00120-251	15.9474	28.5531	27.2937	28.0174	28.0754	27.47	28.1634	27.4621	27.6242	27.3834	26.8127	26.6761	27.3456	27.5419	27.7041	25.7408	26.1478	27.3095	27.8056
MA-00162-150	15.9458	25.1437	25.8072	23.9121	25.7327	25.9974	25.0477	25.6003	26.0118	26.2842	26.0294	25.4369	26.1835	26.3185	25.5434	26.3553	27.1548	26.2418	26.8135
MA-00213-166	15.9279	29.8275	29.8862	28.6148	28.8564	29.5375	29.3553	27.7512	28.6285	29.0372	28.1379	28.5002	28.6013	28.9979	28.1124	28.24	27.8071	26.5231	28.5653
MA-00210-162	15.92	29.7203	29.8102	29.5328	29.4677	29.5888	29.4236	29.2837	29.2235	29.1025	29.0899	28.8695	29.2456	28.9924	28.5027	28.5534	28.6619	28.9138	29.1857
MA-00213-610	15.9102	23.2427	23.6662	22.1604	23.1329	22.8537	23.3312	23.7194	22.9409	23.0965	22.6916	22.3708	22.1822	21.9938	23.3412	22.8719	22.3622	22.1511	22.6613
MA-00173-240	15.8929	29.7729	30.1877	29.2184	29.5697	29.3752	29.5126	28.42	28.7238	28.873	29.0685	29.3927	29.1763	29.2252	29.4999	28.3868	28.7751	29.1864	29.6207
MA-00213-192	15.8627	23.5234	23.5078	22.2019	24.2834	22.4613	23.7893	23.6678	24.0735	22.8459	23.314	23.6089	26.2276	23.1644	23.9573	22.8199	22.5447	22.9749	23.0378
MA-00153-356	15.8275	31.9208	32.1362	31.4421	31.8774	31.5646	31.9523	31.2275	31.3949	31.3176	31.1536	31.4399	31.3509	31.3013	31.3127	31.0285	30.5909	30.8953	31.01
MA-00072-146	15.8235	27.6081	27.5168	26.846	28.101	28.1629	27.433	26.5761	27.0288	27.2773	26.7125	27.5183	27.1071	26.8899	26.7439	27.8489	26.9875	28.3526	28.2289
MA-00213-415	15.7837	33.8608	33.9763	33.6944	33.8515	33.6415	33.8974	32.7917	33.2479	33.0897	33.0624	33.1308	33.1125	33.3698	33.194	33.0544	33.0179	33.1036	33.5062
MA-00297-214	15.7831	28.7158	28.5084	28.4743	29.2207	28.8466	29.19	28.7688	28.792	28.6766	28.483	28.9018	28.9483	27.825	28.0191	28.6678	27.2985	27.9561	28.4147
MA-00120-294	15.7578	24.4763	23.1807	22.7224	23.4882	23.1901	23.1776	23.2708	23.9989	22.936	22.8453	22.7848	22.2939	22.7525	22.9015	22.3885	22.9287	23.1871	23.0617
MA-00182-230	15.7418	25.916	26.1352	25.6426	26.1229	26.3024	26.5663	25.6946	26.3339	25.7849	25.7577	25.2013	26.1129	25.9208	25.2964	25.3933	25.0535	25.2567	25.5066
MA-00323-114	15.7415	27.0439	27.1637	26.547	26.8577	26.8733	27.2383	26.3797	25.0586	26.3337	26.3153	26.3485	26.4707	26.2902	26.706	26.0314	26.27	26.2321	26.8107
MA-00067-320	15.7344	28.8307	28.9534	28.5581	29.2026	28.8198	29.234	28.5053	28.2347	28.5914	28.7784	28.5195	28.7467	28.6668	28.481	28.4697	27.9228	28.0429	27.9758
MA-00182-233	15.7226	22.9373	23.9285	23.1726	24.0036	23.8653	22.8438	23.1828	25.1573	23.7085	24.3611	24.012	24.8856	23.6385	23.7745	24.7396	24.3615	24.4164	25.0968
MA-00101-243	15.6981	28.1596	28.5327	27.6663	28.782	28.8396	22.1459	27.1129	27.5528	27.4259	27.0108	27.541	26.7638	28.0903	27.8632	26.8102	26.7742	28.0152	27.5275
MA-00162-296	15.6902	30.23	29.1842	29.1009	29.4724	28.1874	29.3964	28.204	28.712	28.5207	28.3019	27.9972	28.4132	28.3796	28.0224	28.7462	28.1777	27.619	28.9578
MA-00111-73	15.6622	31.8711	31.7462	31.8158	31.8733	31.3598	31.6024	31.153	31.6463	31.1877	30.9883	30.982	30.9626	31.4313	31.0818	30.9678	30.8303	30.8405	31.0414
MA-00139-364	15.6602	31.2324	31.5706	31.1376	31.6798	31.2489	31.4737	30.4127	31.0511	30.9921	30.653	30.6724	30.6824	30.8709	30.8602	30.5113	30.5481	30.5993	30.7947
MA-00182-342	15.6441	26.9378	27.9378	26.3987	27.6695	27.5252	28.0784	27.4833	28.0214	27.8768	26.9953	26.6079	27.7801	27.9732	27.3711	25.5447	26.7713	26.8336	27.5402
MA-00184-44	15.6423	32.5615	32.5043	32.4144	33.02	32.6237	32.927	32.4318	32.673	32.6293	32.4289	32.2957	32.4362	32.2878	32.1701	32.0961	31.5218	31.7311	32.0832
MA-00017-1	15.6286	28.5413	28.6276	28.6072	28.3772	27.982	28.7945	27.6899	27.9204	27.2723	28.168	28.27	28.9993	28.5703	28.5465	27.8827	27.2106	27.7977	28.4682
MA-00189-429	15.6227	25.4482	25.7035	25.391	26.4366	26.081	26.1119	24.9607	25.7277	25.3582	26.0937	25.5861	25.4124	24.7223	25.9116	25.3138	25.8573	27.1999	25.6875
MA-00268-23	15.6103	24.1113	23.8447	23.129	23.2187	23.4712	22.7838	23.0308	23.158	22.6519	22.6961	23.1548	23.8868	24.1465	23.8388	23.4462	23.3291	23.9282	23.9232
MA-00334-59	15.6053	32.9845	32.7705	32.3145	32.8814	32.4594	33.0417	31.8197	32.3483	32.4142	31.9716	31.9336	32.2842	32.3061	32.1638	31.8844	31.7893	31.5474	32.2908
MA-00323-148	15.5727	31.1892	31.4305	30.8534	31.4029	31.1104	31.4278	30.2572	30.6532	30.3088	31.2019	31.0828	31.5037	31.6006	31.311	31.0198	31.1163	31.5618	31.5203
MA-00120-307	15.5705	25.0394	25.5239	23.9814	24.7127	25.3595	25.0012	24.551	25.7674	24.8217	25.5022	23.944	25.4828	25.7998	25.8734	25.493	25.0899	24.6044	23.808
MA-00270-84	15.5653	30.6602	30.611	30.4873	30.4797	29.8183	30.3471	29.7896	29.5425	30.4098	29.7758	29.8625	29.5057	30.018	30.1847	29.4452	28.9727	29.4353	29.9373
MA-00213-302	15.5421	22.697	22.8747	20.1636	22.1764	22.5154	22.442	21.6277	21.5032	23.0596	21.6773	22.2424	23.3229	21.7291	23.1042	23.004	21.1644	21.3194	21.778
MA-00090-330	15.5021	22.7384	23.5092	24.1004	23.9809	24.0483	24.3522	24.7446	24.5876	23.6932	24.6749	24.2488	24.2552	25.0041	22.4809	23.5743	22.7431	21.9886	23.8354
MA-00160-1	15.4737	24.7899	25.1525	23.8726	25.1741	22.482	25.169	25.1759	25.2014	24.8607	24.3146	26.341	24.9558	24.2752	24.0187	25.6326	24.1777	25.1077	22.857
MA-00210-312	15.4489	24.4581	23.9544	23.3573	24.6311	23.5453	24.9581	24.1085	24.3726	23.5418	23.0387	22.6082	24.6061	24.6471	24.2954	24.2348	22.7342	23.6958	23.3941
MA-00120-5	15.431	27.4778	27.66	27.211	28.1068	27.9363	27.9286	28.2787	27.895	28.4628	28.4324	28.436	28.1745	28.3292	28.477	28.6723	27.978	28.2387	28.5287
MA-00210-129	15.3992	31.9254	31.8139	31.4926	31.8967	31.483	31.7335	31.2422	31.6734	31.1927	31.0561	31.1645	31.0842	30.9682	30.8974	31.08	30.8147	30.5947	31.1092
MA-00067-188	15.3904	24.9902	24.8436	23.9407	23.7919	23.2131	23.5506	22.7142	23.1458	23.9504	24.0008	24.7592	22.7766	26.1108	23.4299	24.3913	22.7961	22.5481	24.0265
MA-00055-37	15.3887	25.0705	23.7747	23.8104	25.5002	24.6208	25.5742	24.6488	25.5119	24.8341	25.615	25.1085	25.1409	25.2492	25.7554	25.235	25.2446	24.7641	26.1614
MA-00073-514	15.3701	27.0691	27.5641	27.4606	27.8132	27.598	27.657	26.3162	27.8008	27.5529	26.4663	26.9924	27.1863	27.9038	27.4438	27.0403	26.4413	26.9328	26.5878
MA-00334-53	15.362	28.8747	28.844	28.1191	28.9141	28.9078	28.7061	28.3261	28.5583	28.7666	28.3837	28.3926	28.1952	27.8887	28.2472	28.4225	27.9366	27.5808	27.8435
MA-00055-232	15.3559	28.0357	28.7794	26.8089	28.282	28.1549	28.0556	27.1822	27.619	27.3739	26.0956	27.0835	27.4053	27.7146	27.5858	27.6314	26.9807	27.4655	26.9963
MA-00184-22	15.3305	23.7112	23.8166	23.2324	24.8669	23.7424	24.7281	23.7005	24.9222	24.6282	24.1681	24.1405	23.9057	25.0005	24.1878	25.3238	24.4484	24.9049	24.6709
MA-00153-264	15.3198	27.87	28.3355	27.7153	28.0604	27.7335	28.2943	27.4238	27.2402	27.0091	27.377	27.6363	27.6395	28.1561	28.5429	27.4674	27.1177	27.7944	27.1
MA-00090-324	15.3184	27.5856	26.9155	25.3315	26.8436	26.089	26.4408	26.7418	28.1117	26.874	25.9682	27.0307	27.195	26.9213	26.1235	26.7821	26.5616	25.8569	24.8742
MA-00067-65	15.3048	30.1708	30.4497	29.7969	30.7047	30.0208	30.5058	29.3469	29.847	29.8997	30.0473	29.6325	29.6334	29.9979	30.2463	29.7257	28.9932	29.3856	29.3359
MA-00153-391	15.2837	24.4143	25.1342	25.3356	23.6436	24.711	23.9753	23.0811	24.8674	23.0681	24.3729	23.9288	24.215	23.7296	24.0462	24.4994	24.145	24.1548	24.3653
MA-00162-242	15.2745	24.5962	24.483	25.5113	25.4102	22.008	23.6005	23.7739	24.8402	24.7967	25.4953	26.4835	23.5643	24.6535	22.186	26.0656	24.9978	25.1154	25.0788
MA-00189-308	15.2512	22.1305	21.9737	21.7304	22.0313	22.0132	21.7671	22.1744	22.8252	22.6829	22.31	21.6511	21.8226	22.3678	21.0801	21.6008	21.4332	21.3013	21.1767
MA-00101-73	15.1908	22.9633	23.7668	22.7192	22.7661	22.562	22.5721	22.7843	22.9976	23.0079	22.2756	21.9871	21.6885	22.8423	21.8293	22.6078	22.1899	21.4367	23.2225
MA-00073-646	15.1813	33.0874	33.0642	32.9751	34.3236	33.1346	33.5641	33.5754	34.0184	33.7849	33.9591	33.8608	33.9848	34.0184	34.0349	33.6088	33.715	34.2689	34.1901
MA-00073-275	15.1569	22.8994	25.9954	26.2797	25.5721	25.4694	23.3003	24.1947	25.6288	22.3153	25.1639	25.0888	24.9748	22.2683	25.7922	26.5029	20.5119	25.4886	23.602
MA-00334-540	15.1339	27.8	27.8001	27.2266	29.0873	28.047	28.492	27.7257	27.4447	27.807	27.8812	28.5775	28.1273	28.3745	27.7943	28.2614	27.8252	27.2937	28.3662
MA-00055-21	15.1242	27.2528	28.224	27.6027	28.2086	27.533	27.4188	27.333	26.8196	27.1406	27.6591	27.528	26.3057	26.9354	26.9035	27.5212	27.057	24.4016	26.9044
MA-00067-308	15.1129	24.3414	24.7025	23.9123	24.4853	24.8125	24.0748	24.2721	24.5523	23.9505	23.6973	23.4111	23.8928	23.6556	24.1589	23.1702	23.8052	24.3541	24.6962
MA-00139-68	15.1027	30.6548	30.8247	30.356	30.5878	30.2395	30.3412	30.0078	30.1024	29.8365	29.6923	29.9814	30.1992	29.9932	29.9943	29.6644	29.4523	29.3224	29.8894
MA-00101-53	15.0505	26.3862	25.8131	24.5557	27.0856	25.8918	26.0381	26.9212	27.3551	26.2365	26.7848	26.8184	25.8854	27.0409	26.6266	26.2277	26.4695	26.2371	23.7147
MA-00120-295	15.0113	27.7131	26.7384	26.8939	28.0535	27.7655	27.7874	27.3523	28.0897	28.0917	27.9167	27.7032	28.2074	28.1968	27.8557	27.6836	26.7897	27.2036	27.9129
MA-00101-284	15.0011	27.5538	28.0748	27.733	27.0538	26.9579	27.5539	26.9075	27.0809	26.8854	27.2471	26.8882	27.1141	27.2264	26.9981	27.1761	26.2454	25.4991	27.0727
MA-00120-30	14.9484	25.4937	24.0485	24.3589	24.6103	24.08	25.7693	26.7928	25.4582	23.2919	24.9047	25.2122	24.4432	25.1969	24.4619	26.7992	23.7678	23.9131	25.939
MA-00303-31	14.9433	30.2238	30.2762	29.8782	30.3138	30.0084	30.4819	30.1751	30.0165	29.5417	29.4777	29.5289	29.5066	29.7963	29.6023	29.4911	29.4849	29.1494	29.6937
MA-00320-65	14.9363	31.8378	31.9162	31.5268	32.053	31.9097	32.304	31.5694	32.0979	31.8401	31.3977	31.5082	31.5471	31.4409	31.3406	31.2647	31.169	30.8655	31.4152
MA-00073-568	14.9286	25.9918	26.3375	25.7342	25.549	26.1232	25.5779	25.4075	26.2799	25.8768	26.0727	27.4675	25.7896	26.5055	27.161	26.4175	24.845	25.8477	27.2352
MA-00189-432	14.9193	28.968	28.5721	27.5974	27.476	28.1921	26.9499	27.5958	27.3689	28.4243	26.8298	26.0637	28.3518	28.3103	28.2576	27.8912	26.8249	27.3699	27.3376
MA-00213-635	14.9181	28.7503	28.951	28.4998	28.9281	28.7921	29.2635	28.182	27.6883	28.168	28.1332	28.4811	28.8088	28.3769	27.8587	28.34	28.1335	28.4389	28.5944
MA-00184-342	14.909	24.7149	25.1139	23.7839	22.4586	24.7681	24.1717	22.7548	24.3339	23.2833	23.9605	24.2721	25.2739	24.8156	24.6615	25.4532	24.0633	24.9074	24.3703
MA-00120-223	14.8475	28.217	28.3722	27.0657	28.8874	28.6254	28.9965	28.3662	28.9142	28.6618	27.0242	28.8165	28.7193	28.7067	28.3765	28.2619	28.2704	27.5581	28.4963
MA-00028-16	14.8383	28.315	28.6862	27.5788	28.3418	28.2522	28.2083	27.8825	27.7727	27.7712	27.9709	27.8597	27.5065	27.3961	27.5482	27.6058	26.5003	27.2011	27.4848
MA-00153-373	14.8294	23.2118	23.5549	21.449	22.4479	23.5139	23.4144	22.3168	22.982	24.0331	23.239	22.6459	22.8731	23.7715	24.8475	22.8669	22.5355	22.6162	23.1855
MA-00297-394	14.8244	31.228	31.3906	30.783	30.2508	30.952	31.0873	30.1192	31.0744	30.4032	30.1987	30.259	30.0491	30.4118	30.4366	30.2344	29.8774	30.6962	30.6357
MA-00112-171	14.8033	28.0783	28.0088	27.6742	27.6732	27.908	27.6928	28.3399	28.4196	28.1685	28.5001	28.5747	28.5067	28.7761	28.4113	28.3026	28.7303	28.4484	28.6883
MA-00213-346	14.8016	25.3498	25.4563	25.2676	25.1535	25.3073	24.6761	25.6038	25.1345	24.999	25.7773	25.4437	25.9332	26.0731	26.0221	25.8191	25.0359	25.2498	24.716
MA-00073-636	14.7762	24.9019	25.9162	24.1158	25.3261	24.5069	25.6068	24.8723	25.6826	25.6439	25.4668	24.9863	24.0886	25.7406	26.6301	24.9114	25.538	23.22	23.2716
MA-00153-277	14.7677	30.1715	30.5222	30.1361	30.9809	30.5659	30.8079	30.0351	30.4912	30.4823	29.7453	29.9424	30.1463	30.2672	29.9205	29.9814	29.7023	29.7617	30.0246
MA-00189-331	14.7674	28.1191	27.4283	27.2405	28.545	28.3536	28.5854	27.501	28.3702	28.1547	28.5671	28.4573	27.9427	28.2114	28.538	28.2846	27.7417	27.4367	28.0898
MA-00090-122	14.7564	27.3836	27.5769	27.2475	28.1847	27.8178	27.9695	27.1573	27.8758	27.7549	27.0401	27.4028	27.5049	27.6528	27.6964	27.5183	26.7169	27.0216	26.9581
MA-00073-246	14.7435	22.6559	21.9395	22.3633	22.1518	22.8185	22.4083	22.9518	22.5975	22.5841	23.2821	23.0844	22.6014	23.0458	23.7297	23.2149	23.0578	22.3908	22.6753
MA-00112-245	14.7328	29.7103	30.0999	29.7956	30.3539	30.0963	30.3637	29.5988	29.8984	29.9117	29.2803	29.4845	29.4473	29.5043	29.5384	29.7195	28.692	29.3858	29.585
MA-00334-422	14.7326	24.5994	26.6106	24.0457	24.0123	25.6061	23.6791	24.0471	24.7075	23.454	23.9438	23.835	23.7366	23.5326	23.3348	22.9206	24.1706	23.8131	23.3009
MA-00182-356	14.6709	30.6699	30.8246	30.0193	30.7001	30.1669	30.5443	29.7828	30.3588	30.0141	29.7273	29.537	30.3442	30.0743	29.6873	29.8286	29.3893	29.469	29.6996
MA-00067-354	14.6489	27.0772	27.0209	26.6709	27.3953	26.1742	26.9871	26.2297	27.2075	27.5569	26.8926	27.4969	27.2322	26.3847	25.9499	26.2955	25.9408	26.1927	27.1665
MA-00073-465	14.6182	27.1548	26.2534	25.9024	27.1661	26.305	27.2732	26.99	27.1922	26.2745	27.3318	27.2486	27.4703	27.56	28.0673	27.1061	26.8123	26.1099	27.1376
MA-00213-371	14.6059	26.3778	27.1663	27.7092	27.2952	27.0792	27.4466	26.138	26.9021	27.2268	26.6842	26.5699	26.9899	26.932	24.8346	26.75	25.0973	26.8837	27.3729
MA-00073-384	14.5918	28.1833	28.1046	26.3823	25.5048	27.0657	27.5077	26.0824	28.4993	27.7	27.9048	27.8163	27.9843	27.8948	27.8879	27.4785	27.3619	27.1143	27.625
MA-00334-286	14.5894	26.0739	27.176	25.9006	26.768	26.3022	25.7514	26.2096	26.5114	26.6905	25.9215	26.5822	26.0585	26.7804	25.9432	26.6168	24.7588	25.3233	25.9286
MA-00112-94	14.5773	23.3796	23.1456	22.4202	22.8472	22.4101	22.7265	21.7295	22.144	22.2702	23.4322	22.2896	22.0714	21.8478	23.5127	23.4044	21.7349	21.0377	22.5386
MA-00162-17	14.5695	26.6752	26.2607	25.9941	25.6479	27.3144	26.6281	25.8055	26.0729	25.8821	25.4051	25.8275	26.01	26.2876	23.4684	25.0501	24.5881	20.063	24.4438
MA-00067-244	14.5155	25.098	25.6201	24.5718	24.7757	25.2296	24.8572	24.2616	25.0824	24.2401	25.3529	24.4854	24.2669	24.5371	25.0319	24.9197	24.0641	23.7799	24.0426
MA-00182-277	14.5002	26.7652	26.748	26.3315	25.9739	26.2821	26.5471	26.6037	26.2543	26.4957	27.5491	27.084	26.9228	27.3259	26.2848	27.3645	26.6339	26.758	27.5209
MA-00320-20	14.4871	24.1143	25.9024	24.1976	26.0977	24.1207	24.0272	24.66	25.417	22.6241	22.9937	22.9461	24.969	22.9902	25.4652	25.0442	22.3214	25.6121	24.6907
MA-00101-78	14.4818	24.8581	24.5532	22.7	25.1544	25.3559	25.0736	24.1461	24.6932	24.797	24.7465	25.1853	25.297	25.1425	24.8078	24.3999	24.3162	24.4452	25.3877
MA-00189-452	14.4795	25.8484	25.2951	25.5472	24.3281	23.5929	25.8262	25.5515	25.6563	24.2864	24.1661	25.4532	24.1758	25.9015	24.9906	24.0449	25.609	25.2447	24.9957
MA-00323-72	14.4484	25.2817	26.128	24.4941	23.1273	26.5722	22.8701	26.037	26.4162	26.5413	26.4416	26.6614	26.9925	25.9839	26.3307	26.6179	23.926	26.2303	24.5742
MA-00073-83	14.444	28.0251	28.2456	27.978	27.4381	27.5132	28.0019	27.4103	26.8708	27.0385	27.2348	27.3257	27.1468	27.0975	27.2961	27.6065	27.565	27.0779	27.4328
MA-00213-528	14.4251	24.4791	24.3872	22.8387	23.3126	24.0602	24.2575	23.9226	23.9784	23.7234	23.4822	23.1196	23.7604	23.7907	23.2294	23.7782	24.4058	23.4274	25.8586
MA-00182-241	14.4069	28.9981	28.8652	28.5078	28.6997	28.5121	28.0531	27.3786	27.8275	27.8097	28.1762	28.5774	27.705	29.0437	28.9482	27.3042	27.9732	28.5557	28.5422
MA-00270-85	14.392	22.9794	23.23	22.3183	22.9785	22.0566	22.6918	21.5723	22.2682	21.6976	21.6942	21.7477	22.0264	22.5849	21.9952	22.6133	21.4163	22.0257	22.5771
MA-00139-77	14.2754	28.7755	29.0047	28.3874	29.129	29.0081	29.0556	28.0653	28.1316	28.277	27.8636	28.6358	28.1989	28.7051	29.0499	27.856	28.109	28.087	28.3893
MA-00055-220	14.2372	30.6489	31.0206	30.5571	30.6713	30.2965	30.6544	29.6128	30.1756	29.9854	30.0612	30.1745	30.1699	30.1097	30.1128	29.7904	29.7813	29.8553	30.2786
MA-00210-55	14.2264	26.2064	26.6136	26.4008	26.3207	26.5748	26.9763	26.4976	25.8755	26.4962	26.6309	26.7862	25.8871	27.0872	26.8986	26.5502	27.1694	27.1933	27.3156
MA-00297-361	14.2264	25.7231	25.7572	24.2686	24.4603	24.9585	25.6264	24.5702	24.9521	24.4465	23.5636	24.4134	24.6822	24.7668	24.337	24.5398	24.4885	23.7066	24.7744
MA-00184-401	14.2134	27.4612	27.7471	25.8568	28.3523	27.947	26.9275	25.7642	27.3617	26.9063	26.9771	26.8399	27.6559	27.2968	27.8816	27.8461	27.8019	26.9351	28.1032
MA-00334-442	14.2075	26.7146	27.1295	26.5613	27.4011	26.9963	27.7131	27.2039	27.9092	26.9982	27.8171	27.8257	27.6845	27.5371	27.4444	27.3179	27.3197	26.9639	26.8425
MA-00184-99	14.1718	29.2383	29.4711	29.2999	29.0271	28.7561	29.3632	28.8435	28.9238	28.6884	28.8097	28.8061	29.028	28.5611	28.446	28.4725	28.2759	28.5149	28.5901
MA-00073-649	14.1293	23.3048	24.4936	23.1362	23.3785	23.4913	23.0681	21.8885	22.5787	22.81	22.7051	23.0439	22.7452	23.803	22.7797	23.049	23.3758	23.3038	23.3419
MA-00073-327	14.1113	24.4134	24.8736	23.0044	24.1242	23.925	25.5796	25.096	24.6419	24.4204	23.9895	24.2568	24.0325	24.4117	24.4843	23.9	23.5308	23.7632	23.5588
MA-00120-52	14.1067	25.291	23.356	25.0524	25.4956	24.394	25.3203	23.0654	24.7351	25.2155	25.5674	25.6186	25.2326	25.4791	25.347	24.9845	25.5522	26.486	25.6424
MA-00184-222	14.0854	29.1605	29.416	29.0287	29.1204	28.7777	29.3563	28.7236	28.8002	28.9234	28.4326	28.4411	29.1444	28.8416	28.9714	28.8196	28.2455	27.6579	28.4021
MA-00297-428	14.0784	30.8539	30.7571	30.6187	30.909	31.1052	31.2266	30.5573	31.0479	30.7352	30.5616	30.4405	30.8498	30.7932	30.7907	30.685	29.86	29.6755	30.3232
MA-00184-530	14.0441	21.589	23.5335	22.2918	22.8849	23.3922	23.0598	21.5946	22.2919	22.3164	22.0616	22.5951	22.3351	22.5133	22.394	22.723	22.2453	23.3558	22.6268
MA-00326-183	14.029	30.7836	31.1503	30.554	31.2671	30.7224	31.405	30.6132	30.7533	30.7325	30.3313	30.393	30.7025	30.2502	30.2907	30.3303	30.306	30.3379	30.1789
MA-00184-478	14.0256	29.7616	29.9904	29.4385	29.9107	29.2821	30.0423	28.8451	29.5798	29.5542	29.4301	29.1502	29.1527	29.5819	29.7512	29.4211	28.7596	28.6079	29.0205
MA-00297-204	13.9713	32.5882	32.6888	32.3601	32.7415	32.7659	33.1933	32.6811	32.8982	32.7074	32.5042	32.2684	32.3749	32.5767	32.4057	32.3995	31.8449	31.5863	32.2292
MA-00112-119	13.9681	21.9029	22.0053	21.9276	21.4869	23.2245	22.2616	20.4024	21.7623	23.235	21.5403	21.3224	23.2104	21.7845	23.3079	23.4848	21.3161	22.6729	22.8648
MA-00101-584	13.9674	30.9535	31.2035	30.4188	30.6985	30.6453	31.2744	30.3069	30.6342	30.5131	30.3028	30.1917	30.5786	30.5391	30.1239	30.4841	29.7043	30.0198	30.1461
MA-00090-193	13.9645	24.9638	25.4739	24.1655	23.909	23.9008	24.2097	23.6667	25.088	24.6908	24.2936	24.3275	24.6773	24.4581	24.0288	22.9403	24.435	24.1645	24.3649
MA-00139-143	13.9492	29.2466	29.2515	29.1634	28.4863	28.7389	29.4345	28.7426	29.1007	28.86	28.9545	28.9764	29.1911	28.7587	28.3793	28.0044	28.3111	27.9922	28.7161
MA-00173-108	13.9051	24.572	25.215	24.1972	25.2742	24.4915	24.8156	23.604	23.422	24.2369	23.5082	23.6321	24.5555	24.5572	24.605	23.8322	24.711	24.3359	24.5565
MA-00120-493	13.8842	24.0536	21.3595	23.455	23.94	23.9247	22.0787	24.417	22.0717	24.3983	24.2244	23.7934	23.8028	24.6024	22.6484	24.4185	23.4476	23.629	24.0666
MA-00090-169	13.8815	30.0117	30.0392	29.8345	30.7609	30.464	30.5631	30.6073	30.9373	30.7575	30.8284	30.9679	30.7653	30.905	30.6735	30.7102	30.2114	30.6255	30.5106
MA-00112-50	13.8702	30.1682	30.196	30.3897	30.8207	31.1116	30.9775	30.0961	30.746	30.1833	29.7006	30.1707	30.0479	30.2116	30.6248	30.7376	30.276	30.3009	30.4808
MA-00323-137	13.847	28.7561	28.6103	29.0177	29.6518	28.8755	28.6517	28.6905	28.4647	28.6931	27.9685	28.1594	28.4935	28.351	27.745	28.25	27.8529	27.8052	28.7615
MA-00090-148	13.8468	29.1748	29.65	29.3572	29.4724	29.1212	29.6049	28.728	29.2573	29.068	28.9149	27.4592	29.0329	28.8635	29.7021	28.563	28.2302	28.3304	29.2556
MA-00139-210	13.8399	27.1228	27.4913	27.1948	27.8717	28.1715	28.3294	27.4407	27.5834	27.7506	28.0222	27.6294	28.091	28.0772	28.5918	27.7	27.2993	27.6099	27.997
MA-00297-438	13.8223	28.8857	29.4822	29.5454	28.0781	28.7363	28.9477	28.5896	28.185	28.1594	29.2539	29.3422	28.5068	28.8796	28.5099	28.4812	28.7161	28.6798	29.0645
MA-00090-214	13.7612	27.8927	27.2847	24.3746	26.0163	26.8993	26.9055	26.734	27.1727	27.1448	26.3097	26.7594	27.5891	27.7791	27.8677	26.6561	27.111	25.1069	28.0648
MA-00184-164	13.7192	30.2664	30.8059	30.3364	31.2225	30.9242	31.0017	30.9827	31.3561	31.3406	31.343	31.3599	31.4601	31.654	31.3331	31.2915	30.8053	31.0198	31.1551
MA-00184-300	13.7189	28.7928	28.6059	28.6718	29.0846	29.1562	29.5148	28.5017	29.342	28.7908	28.835	28.5092	28.1108	28.4741	28.2414	28.8082	28.1974	28.2175	28.4691
MA-00334-62	13.7037	25.4887	24.9123	24.9533	26.1068	25.3074	25.7459	25.3413	25.61	25.6475	26.1309	26.1114	25.2159	25.8249	25.4581	25.6505	24.9718	24.4047	25.2246
MA-00184-257	13.6271	26.9411	26.6769	26.8883	27.2134	26.835	27.2083	26.2673	26.8861	26.8653	27.0223	25.1925	27.3034	27.1277	26.3574	25.4781	26.1574	25.1102	27.0563
MA-00334-214	13.6223	29.3065	29.7711	29.1336	29.389	29.1305	29.2616	29.2617	29.7101	29.3173	28.9264	29.1847	29.4455	29.5894	29.1897	28.9939	27.8876	28.6077	28.6356
MA-00073-529	13.5419	27.1484	27.0752	26.9644	27.674	27.3696	28.322	28.1602	27.6544	28.3021	27.7853	28.0663	27.573	28.3331	27.4588	27.9742	27.2539	27.4576	28.1736
MA-00101-532	13.5115	26.7719	24.4123	26.8486	27.3192	26.9759	26.7699	25.8122	26.7365	27.4002	24.1495	27.7669	26.3532	26.8618	26.3037	26.8361	26.2256	25.9042	27.3109
MA-00213-162	13.5062	28.0388	27.5948	27.5867	28.0574	27.1613	28.5333	28.0458	27.1992	28.0526	28.2944	28.2028	28.5492	28.4381	28.8095	27.8213	27.3101	27.4763	27.6889
MA-00203-2	13.5033	31.0992	31.1472	30.7279	31.2379	31.0021	31.5481	30.9493	30.869	30.7929	31.5844	31.2849	31.1969	30.9382	31.2749	31.302	31.6337	32.0238	32.0993
MA-00072-283	13.4925	29.0007	29.4033	28.722	28.9025	28.8157	28.0978	27.9946	28.1223	28.3659	28.1914	28.6113	28.3773	28.5122	28.6751	28.64	28.6148	29.1993	29.2337
MA-00120-136	13.4704	24.1796	25.9224	24.5125	24.4474	24.6744	25.4261	23.8432	24.8026	24.4128	24.2845	24.369	24.1323	24.5066	25.1854	24.4666	23.8708	23.9245	23.7621
MA-00297-182	13.4591	27.1364	27.3802	26.6374	26.4119	26.7226	26.4425	26.0732	25.9998	25.8424	26.335	26.2837	26.2564	26.4383	26.1102	26.6425	26.1623	25.4424	26.4656
MA-00072-156	13.4367	24.2203	25.0492	24.4139	25.1116	25.1258	24.6839	24.2819	25.1661	25.046	23.8879	24.4262	24.5988	24.7935	25.745	25.0955	24.3635	24.5546	24.3295
MA-00309-1	13.4341	28.2544	28.5368	27.9897	29.2214	29.0181	29.1701	28.5108	29.0424	29.2491	28.3832	28.6295	28.7702	28.6775	28.7331	28.8833	27.8403	28.2767	29.0205
MA-00067-347	13.4266	22.7722	23.3781	22.9038	23.2407	23.0069	23.0009	23.5596	23.7886	29.961	23.6191	23.2971	23.5536	23.7139	23.0716	23.1578	23.0658	25.0652	23.3745
MA-00055-217	13.4259	29.28	29.6919	29.6219	28.9748	29.4686	29.4622	28.3842	28.8141	28.7169	28.6884	28.7647	28.899	29.1935	28.8437	28.6162	28.6972	29.1624	29.0648
MA-00182-306	13.4211	27.8508	28.3926	27.5584	27.3438	26.8651	27.332	26.6737	27.1925	27.1756	26.9441	27.3136	27.6719	27.222	26.9447	26.7965	27.0626	26.7512	27.0044
MA-00323-21	13.419	28.2312	27.5389	26.7416	27.6056	27.7804	27.471	27.3499	27.6009	27.3068	27.5215	27.2844	27.558	26.5043	26.8663	27.335	27.2726	26.7801	26.4233
MA-00073-314	13.3995	28.4285	28.211	28.3818	28.3116	27.5145	28.1112	27.1089	27.9148	27.6252	27.5557	27.5941	27.5288	27.771	27.4221	27.544	26.9928	26.9214	28.2114
MA-00072-246	13.3945	29.1561	29.4025	28.9724	29.9649	29.4954	30.1305	28.9822	28.7634	28.8747	29.5295	29.4283	29.1631	30.0758	29.7461	29.0632	29.6869	29.0011	29.902
MA-00153-516	13.3931	28.7742	29.1269	28.8496	29.5479	28.7786	29.449	28.4955	29.0552	28.7204	28.9995	29.3657	28.9092	28.8077	28.5446	28.6525	28.5374	27.1441	28.8517
MA-00189-330	13.3552	25.7693	26.1062	26.1092	25.6315	25.2229	25.1286	25.3173	25.3643	25.2503	24.9323	24.7219	26.0145	24.8566	22.1969	24.713	25.4611	24.2917	24.7328
MA-00213-651	13.3524	25.1697	23.2482	21.3047	24.0574	23.7632	23.3766	23.1612	23.154	23.1538	23.1105	22.9349	22.926	23.0763	23.629	23.7688	23.1177	21.6875	22.6332
MA-00023-29	13.3252	27.678	28.217	27.5988	28.0281	27.7573	27.9787	27.0812	27.4998	27.4348	26.7419	27.2548	27.181	27.4472	27.2186	27.5441	27.3519	27.0245	27.3521
MA-00326-7	13.2968	28.0376	28.7992	28.2052	26.6082	27.9025	28.0339	28.1692	28.9327	28.1559	27.9857	28.1122	27.5313	27.5309	28.3412	28.0719	27.7541	27.6344	27.314
MA-00073-259	13.2864	26.2741	24.8911	25.0512	25.093	24.3119	25.7626	26.365	25.7633	25.5731	26.0236	25.1582	25.2459	26.4279	25.8233	25.8352	25.1757	25.9585	24.9075
MA-00317-12	13.2803	28.6472	29.3922	29.1368	28.9189	28.5781	29.1815	28.1817	28.6116	28.5887	28.3637	28.3119	27.9017	28.6578	28.0336	28.4233	27.9394	28.1398	29.0449
MA-00326-84	13.2734	27.6977	27.8645	27.4587	28.4706	28.1493	28.1338	27.6961	27.7482	27.2395	26.8925	27.0203	27.5772	27.5282	28.0963	27.0626	26.9743	27.5067	28.2584
MA-00213-101	13.2586	23.0602	23.4266	22.719	23.3145	23.0949	22.674	23.1693	23.2377	23.7168	22.7926	21.6337	22.9772	22.7677	22.3086	22.8958	22.5714	22.1813	22.4443
MA-00153-540	13.2424	33.5179	33.5867	33.2897	33.7946	33.1453	33.4209	32.6592	33.2479	32.9641	32.7752	32.8164	32.9507	32.8107	32.7119	32.8455	32.5329	32.4678	32.8571
MA-00055-249	13.2246	28.2731	27.9435	27.9437	28.7198	27.8972	28.2075	28.0338	27.5077	27.4231	27.3676	26.4264	27.8061	27.4263	27.3808	27.811	27.8059	27.1837	28.0465
MA-00153-81	13.2231	23.7738	24.8402	24.4334	24.9837	24.4503	24.0591	24.1689	24.5085	24.0029	24.5723	24.1835	24.4136	24.5705	24.5898	22.6672	22.4808	23.9456	23.7633
MA-00112-187	13.1811	29.1897	29.2191	29.0393	29.4888	28.5061	29.1155	28.0189	28.2852	28.5843	28.2707	28.7322	28.5529	28.6817	28.2412	28.4485	28.3979	27.8661	28.9354
MA-00184-326	13.1743	29.8494	29.901	29.5242	29.8496	29.5027	29.5388	29.3579	29.6993	29.4076	29.1934	29.3256	28.9066	29.1331	29.0101	28.7782	29.0901	28.7304	29.5196
MA-00073-124	13.1364	25.4221	26.3871	25.8933	26.2532	26.2251	25.8683	26.027	25.4321	25.9077	25.4943	25.9485	25.8083	25.8657	25.8549	25.771	26.4155	26.6874	26.9421
MA-00112-154	13.1339	24.2883	24.7629	24.374	24.9277	25.6362	24.8212	25.0761	25.7752	25.2721	24.2557	24.3181	25.2687	24.7109	25.5836	24.8034	26.1874	25.2775	24.8252
MA-00182-270	13.1165	26.0736	25.6871	26.2151	26.7856	26.0757	26.9393	26.7563	27.0453	26.6615	26.8637	25.3897	26.6569	27.0405	26.3577	26.7274	25.6726	24.8635	26.681
MA-00184-223	13.1051	28.2481	27.4281	26.4966	27.562	27.3365	27.9578	27.1828	27.6889	27.699	27.934	28.2254	27.6229	27.6064	26.7558	27.3636	26.5909	26.9078	27.2648
MA-00153-42	13.0702	30.7622	31.1758	30.6205	30.8629	30.7047	30.9981	30.0358	30.3456	30.1691	30.4433	30.1503	30.2756	30.095	30.2948	30.2535	30.0714	30.1545	30.5403
MA-00184-580	13.0601	26.0437	26.3491	25.8402	26.3832	26.4901	26.7027	26.6158	25.8844	25.6626	25.8715	26.4338	27.3408	26.6991	26.8311	26.9235	26.8363	26.7995	27.5697
MA-00153-501	13.0499	28.3122	28.7837	28.1462	28.8706	28.5309	28.6838	28.009	28.1054	28.0054	28.516	28.6631	28.6292	28.0179	28.5055	28.2527	27.7352	27.9922	27.7265
MA-00184-392	13.0095	25.7076	26.5069	26.1548	26.1883	26.3703	26.34	25.8357	25.6762	25.7067	25.538	25.4538	25.3515	26.4732	26.5608	25.8999	25.724	26.165	25.7815
MA-00139-311	13.0021	22.5789	25.0259	23.4339	25.2696	24.3334	25.308	24.6521	25.2304	25.2864	22.7995	25.1752	25.9072	25.2695	24.5309	26.0844	25.1739	24.0687	25.5392
MA-00120-215	12.9996	21.2771	25.9859	20.3593	26.0519	26.0241	26.6427	25.2347	26.2032	25.9867	25.7639	25.845	25.9556	25.6934	26.2525	25.7219	26.0933	25.9385	26.4057
MA-00334-415	12.9982	29.7812	29.4632	29.242	29.6152	28.9494	29.4358	28.9249	29.25	28.9998	28.6538	28.7065	28.7025	28.9203	29.6053	28.1104	28.3307	28.191	29.0998
MA-00173-202	12.985	29.8068	30.086	29.6637	30.4727	30.0972	30.6309	29.656	30.2265	30.065	29.7599	29.8507	30.1623	29.8717	29.8254	30.0903	29.3685	29.0324	29.7301
MA-00090-463	12.9673	26.4475	26.2106	25.6083	26.2366	25.9857	26.0763	25.3448	24.3116	25.3009	25.3834	24.9812	25.7492	26.3393	26.6709	25.5703	25.5285	25.677	26.1878
MA-00120-86	12.9382	30.3613	30.4338	29.6157	30.5956	30.1061	30.3801	28.9799	29.6089	29.431	29.5929	29.5916	29.727	29.5874	29.6931	29.4713	29.1682	29.5593	29.8944
MA-00184-511	12.9229	24.6991	25.7358	24.1347	24.8622	24.8772	24.471	23.947	25.5832	24.7428	24.1669	23.4902	24.5066	25.0338	24.1462	24.8448	24.8237	25.3391	25.4286
MA-00153-271	12.92	32.2483	32.2348	31.9656	32.6834	32.1359	32.5014	31.5781	31.8274	31.7478	31.8539	31.6837	31.6451	31.7721	31.785	31.6429	31.0961	31.5042	31.6984
MA-00109-3	12.9162	26.9182	27.4381	26.1434	25.5025	27.6741	26.8204	25.7608	25.985	25.5961	25.936	26.143	25.9727	26.5744	26.21	26.028	25.3948	23.7994	26.048
MA-00206-77	12.9151	22.9879	24.9719	23.3365	22.6676	23.5052	24.4494	23.082	23.4065	24.1155	23.8182	25.0302	24.3553	23.886	24.6962	24.1024	22.7473	23.8071	24.102
MA-00101-658	12.8972	24.3262	23.8227	23.3769	23.3123	23.8792	24.6323	23.24	23.8893	24.2534	24.3793	24.3643	24.7331	24.9364	24.136	22.8703	23.815	22.8209	23.7826
MA-00072-265	12.8868	29.6087	29.8953	29.2187	29.6653	29.0669	29.3911	28.2199	28.624	29.1016	28.6293	28.9244	28.8012	29.0346	29.5365	28.2264	28.7849	28.6782	29.7146
MA-00323-138	12.8607	26.5717	26.6879	26.276	25.788	26.4797	26.5678	25.5074	25.0119	25.8589	25.8812	24.8613	26.7553	25.7266	24.5282	26.3626	26.081	26.4742	26.7154
MA-00182-227	12.8482	26.8697	25.9427	26.4284	25.9635	27.0611	27.2034	26.958	27.0767	27.2004	27.5607	26.8491	26.7848	27.4297	26.7739	27.355	27.0073	25.896	26.6089
MA-00072-333	12.8475	25.3127	25.7878	25.4058	26.5442	25.7636	25.8522	26.4274	26.3479	25.2256	25.1983	23.694	25.7335	25.2964	26.5841	25.062	24.7436	25.3124	26.5872
MA-00153-328	12.8331	31.3624	31.8851	30.9928	32.5693	32.0506	32.3704	31.7209	32.4997	32.2736	31.9283	32.4529	32.2128	32.1788	31.7726	32.08	31.4332	31.6543	32.1842
MA-00334-464	12.8184	24.3735	24.4455	24.3456	24.9061	24.5534	24.3135	23.7009	23.7335	23.9319	24.0774	23.2153	23.9593	24.0774	24.4005	23.5692	23.1813	24.774	24.6549
MA-00210-141	12.7776	28.5059	27.5516	26.0824	28.3661	28.5127	28.2679	28.6596	28.9507	28.4256	28.8938	28.8901	29.2656	29.0256	28.8311	28.8681	28.7984	28.5701	28.1191
MA-00334-537	12.7245	24.9312	25.6048	24.9933	25.6872	24.0988	24.8209	22.9451	24.0745	24.5783	24.5378	24.5151	25.0423	24.9671	24.5394	25.0152	23.698	24.4341	25.2465
[truncated: 681 more rows]

## Sheet: Sheet2
Metabolite ID	HotellingT2	24h_1	24h_2	24h_3	24h_4	24h_5	48h_1	48h_2	48h_3	48h_4	48h_5	96h_1	96h_2	96h_3	96h_4	96h_5	144h_1	144h_2	144h_3	144h_4	144h_5	168h_1	168h_2	168h_3	168h_4	168h_5	216h_1	216h_2	216h_3	216h_4	216h_5
Mevalonic acid	12390.2	12.8416	12.4742	12.9069	12.8357	10.7566	12.7207	12.8078	13.0532	12.8514	12.8727	20.4476	20.5261	20.5165	19.9316	20.1581	21.9495	22.6164	22.4551	22.0054	22.0088	23.0789	22.8288	22.9933	22.6822	22.4701	18.8817	18.9686	18.4415	18.2184	17.9826
Beta-D-Glucopyranuronic acid	12167.7	12.8784	13.5142	13.412	14.0189	13.0835	13.8435	14.5265	13.92	14.0447	13.7419	14.997	15.1033	15.0909	15.2985	15.1155	20.9388	20.8727	21.0625	20.9742	20.6971	21.0625	21.2184	20.9672	21.1079	21.2184	23.9225	24.1253	23.9584	24.1174	23.9225
Gluconic acid lactone	7135.28	29.8489	29.8474	29.8415	29.8564	29.8726	29.8339	29.8489	29.7911	29.8249	29.8608	22.848	23.1946	23.0789	22.9043	23.2679	25.8576	25.433	25.5696	25.2353	25.1984	25.6513	25.5898	25.6918	25.3135	25.3307	25.9248	25.7895	26.1546	26.4723	26.8741
N-Acetyl-L-glutamine	5890.75	19.647	19.5731	19.8469	19.7537	19.6903	15.3304	15.6718	15.4054	14.5387	15.8484	15.7576	15.8037	15.9703	15.2023	16.1615	14.7419	14.9246	14.8775	15.0743	14.9293	16.8238	16.7987	16.8484	16.8606	16.92	12.4147	12.5167	12.3745	12.7334	12.3332
Proline	5108.02	28.0965	28.0505	28.0557	28.0864	28.0609	27.5389	27.7645	27.6663	27.673	27.7895	24.8336	24.945	25.0317	24.8336	24.9043	23.5285	23.7995	23.48	23.4923	23.6431	23.8191	23.7796	23.8385	23.6209	23.8385	23.4676	23.5869	23.5285	23.5285	23.6209
Betaine	4794.87	26.0359	25.9672	25.9584	26.1391	25.9933	25.5667	25.6971	25.8623	25.7821	25.8142	24.3975	24.558	24.5754	24.5983	24.5926	22.5356	22.6865	22.695	22.6971	22.632	21.6714	21.6714	21.743	21.6929	21.8461	20.3211	20.7223	20.7471	20.7056	20.6186
Acetyl-L-carnitine	4710.64	31.099	30.8081	30.7849	31.1361	30.9045	30.2759	30.2535	30.4727	30.5109	30.5014	26.9203	26.8858	26.7895	27.0914	27.1214	26.0914	26.2481	26.2517	26.1546	26.0609	26.2262	26.0975	25.8457	25.9134	26.329	27.0813	26.632	26.7895	26.8974	26.8019
Argininosuccinic acid	4517.81	21.1825	20.9812	21.1206	21.0756	21.1143	21.5261	21.343	21.4118	21.4067	21.4526	18.7406	19.3189	19.3857	18.786	18.7828	18.1752	18.2967	18.2922	18.3962	17.9601	17.5507	17.6311	17.3495	17.1752	17.6869	16.2213	16.0426	16.0211	16.1694	16.1257
N-Acetyl-L-tyrosine	4411.9	14.4512	14.5447	14.6154	14.7046	14.1674	14.1984	14.2586	14.5204	14.392	14.4576	13.6096	13.7731	13.5864	13.7419	13.6211	13.9385	14.0447	14.4383	13.8823	14.0102	13.9476	13.7099	13.8138	13.8037	13.4893	19.2989	19.3277	19.2466	19.3878	19.2396
Hypoxanthine	4383.36	21.4775	21.7307	20.6364	21.3101	21.0951	20.9742	19.9229	20.6006	20.1332	18.5165	24.6431	24.8576	24.8811	24.8858	24.848	27.2803	27.463	27.4785	27.4073	27.2445	26.2058	26.463	25.9955	25.9134	25.6838	27.5898	27.7389	27.4938	27.7389	27.4551
D(+)-Phenyllactic acid	4283.51	18.2604	18.1605	18.3277	18.4656	18.3277	18.1605	18.4576	18.5394	18.4815	18.417	16.318	16.3321	16.5522	16.601	16.5417	15.3547	15.4383	15.4608	15.4318	15.2949	15.2549	15.2841	15.3127	15.2622	15.3233	13.169	13.3443	13.2674	13.4893	13.3304
Nicotinic acid mononucleotide	4037.1	13.263	13.0785	13.169	13.2659	13.2393	12.8861	13.0379	12.9069	12.8956	12.6795	13.158	12.4717	13.1469	13.1892	12.7377	15.8238	15.9635	15.8679	15.9339	15.6268	15.7445	15.68	15.7936	15.8679	15.4925	17.734	17.7005	17.624	17.734	17.6937
L-Saccharopine	3422.97	22.9098	23.1316	23.1253	23.1534	23.1158	21.7715	22.0625	21.8651	21.8839	21.8346	19.2372	19.4435	19.6971	19.4576	19.5413	19.7634	19.4273	20.2066	20.2764	19.8515	19.6453	19.6783	19.7553	19.8697	20.3962	18.3878	18.5318	18.5127	18.4004	18.4456
2-Hydroxyvaleric acid	3363.24	20.0559	20.1079	20.2877	20.4067	20.2302	20.3962	20.5451	20.6006	20.4676	20.5545	20.1825	20.3538	20.265	20.2764	20.3752	18.1556	14.8918	18.2419	18.4696	18.2741	17.8361	17.8606	17.6593	17.7406	14.8918	15.5805	16.0211	15.5296	15.6718	15.7073
Ketoleucine	3312.37	33.8883	33.7751	33.8883	33.7751	33.6198	33.3828	33.6415	33.6415	33.4083	33.4209	29.5147	29.4862	29.7958	29.3515	29.17	31.2924	31.4134	31.4775	30.8608	30.8901	31.0673	31.1052	30.8385	30.5203	30.7373	29.0505	29.4707	29.0557	29.0137	28.7227
Gluconic acid	3230.44	18.9798	19.5394	19.5951	19.6293	19.1104	18.3189	18.8454	19.3012	19.0743	19.6042	20.8034	21.391	21.6006	22.2961	22.5938	23.48	23.7695	23.6865	23.4676	20.2419	23.7995	23.9225	23.7077	23.4923	24.0854	19.7699	19.8667	19.4334	20.4676	19.2967
Uridine diphosphate glucose	2991.95	26.9316	26.8142	26.8741	26.7517	26.632	26.0975	26.1174	26.0711	25.8858	26.0526	24.9933	24.945	25.0359	24.7389	24.8576	23.5045	23.4551	23.6971	23.5522	23.5638	23.3376	22.9637	22.6757	23.0609	23.1976	20.417	20.8651	21.1332	19.8144	20.714
N-omega-Acetylhistamine	2927.63	27.1795	27.2714	27.4394	27.4314	27.2535	27.1604	27.4073	27.5389	27.3992	27.4707	26.0629	26.0772	26.1527	26.1565	26.1833	24.3444	24.4923	24.2244	24.275	24.1253	24.0772	23.7695	23.8858	24.0691	23.8385	22.5093	22.6029	22.5522	22.8073	22.5141
2-Hydroxy-2-methylbutanoic acid	2901.17	22.5592	22.6186	22.2273	22.4247	22.5731	23.0983	22.8423	22.7098	22.8783	22.6475	22.502	22.2877	22.695	22.1704	22.6186	20.4775	20.2184	20.1079	20.3962	19.92	19.9127	19.9742	20.002	20.0559	19.6024	17.5878	17.4656	17.68	17.6869	17.7005
Ornithine	2852.71	26.1194	26.0567	26.228	26.3612	26.141	23.8764	23.9406	24.5754	24.7846	24.7441	21.3857	21.2477	21.1886	21.4324	21.6453	21.0886	21.0292	20.9951	20.8269	21.0088	20.9742	20.953	20.7715	20.5451	20.6886	21.8461	22.002	20.9459	22.0918	22.2125
Cytidine 5'-diphosphocholine	2798.48	18.786	18.6453	18.7731	18.9601	18.7634	17.3836	17.5204	17.1752	17.7207	17.3495	16.8113	16.4021	16.0701	16.2288	16.8727	16.0659	15.5893	16.6937	16.1337	16.3987	15.5204	15.4704	15.4862	15.4956	15.7498	14.3443	14.2949	14.4318	15.0232	14.2949
Sucrose	2760.29	22.5356	22.1795	22.2506	22.2792	22.2877	26.6458	26.5404	26.4567	26.604	26.673	26.228	26.1623	25.9088	26.1293	26.3101	24.5638	24.6375	24.8191	24.7492	24.8093	23.7695	23.5404	24.1719	23.0542	23.632	22.4551	23.2405	22.9864	23.1931	23.2096
2-Hydroxycaproic acid	2747.53	18.6903	18.8175	18.8515	18.9992	18.68	19.1457	19.2184	19.2396	19.2302	19.3123	18.5731	18.3962	18.6382	18.7005	18.7106	17.2137	17.5657	17.4736	17.4496	17.4415	17.2232	16.9545	17.1257	17.2137	17.2877	13.7936	14.3718	13.9926	14.2805	13.8533
Methyl acetoacetate	2626.25	24.4862	24.3578	24.5869	24.2317	24.1642	23.9406	24.1015	24.1095	23.7182	23.895	19.6453	19.6293	19.9459	19.5146	19.8921	21.6409	21.9171	22.2096	21.6453	21.823	21.5165	21.5165	21.3376	21.4015	21.4273	18.7005	19.4025	19.2137	19.2922	19.0426
Adenosine 5'-monophosphate	2588.29	20.2877	20.3211	20.3101	20.3321	20.3752	17.2232	17.2232	17.6168	17.734	17.6311	16.0232	16.3718	16.7731	17.3056	16.7987	17.5127	17.5582	17.3667	16.7471	17.2787	16.8238	16.5995	16.579	16.9316	17.4334	16.7602	16.412	16.8361	15.9499	16.0319
DL-Malic acid	2585.61	24.2317	24.1253	24.141	24.1946	23.9933	24.239	24.2679	24.3031	24.1795	24.2961	23.1348	22.8913	23.1031	23.0476	23.0325	22.0122	22.2961	22.0592	22.1363	22.0821	21.654	21.4775	21.5777	21.502	21.4923	20.3321	20.4273	20.2066	20.3538	20.0951
Uridine 5'-diphosphogalactose	2565.51	19.3079	19.3012	19.3255	19.2349	19.1079	18.4972	18.5165	18.4854	18.2466	18.5731	17.4576	17.3145	17.417	17.1946	17.2326	15.8751	15.7419	16.0638	15.8654	15.9385	15.7018	15.1713	15.1713	15.3092	15.7126	13.8918	13.1293	13.4893	13.1066	12.8017
3-Methylhippuric acid	2547.97	14.5507	14.5567	14.6937	14.7834	14.5018	17.2512	17.5127	17.4334	17.3233	17.3836	16.624	16.4021	16.4878	16.5477	16.5158	17.4893	17.6731	17.6168	17.5049	17.4415	17.4087	17.3667	17.3408	17.3145	17.392	19.2627	19.3983	19.2512	19.3962	19.2372
Alpha-ketoglutarate	2446.14	25.2856	25.3307	25.4105	25.3844	25.0772	24.1946	24.1719	24.3031	24.3778	24.3645	20.2066	20.1946	20.4375	20.0559	20.265	22.8932	23.1503	23.3376	23.0918	23.0476	23.1079	22.9513	23.1079	23.0156	23.0902	22.821	22.6453	22.7492	22.6907	22.5141
Quinic acid	2441.37	21.2989	21.4626	20.9951	21.1395	21.2877	21.1642	21.0493	20.9388	21.0625	20.714	19.2627	19.1206	19.2066	19.0265	19.2535	17.3321	17.1556	17.0319	16.9545	16.8727	16.6382	17.0638	17.0743	16.5849	16.4878	18.9402	18.9854	19.1257	18.6766	19.0238
D-Raffinose	2431.31	21.8913	21.1395	21.9207	21.7307	21.6186	21.2244	21.3857	21.3592	20.9951	21.343	19.9083	20.2764	20.1825	20.2184	20.0821	18.9171	18.7273	19.3034	18.8876	18.9054	18.392	18.6132	17.805	18.0951	18.4536	16.6937	16.8361	16.412	16.8113	16.6096
Xylose	2245.94	20.8113	21.1332	20.4375	20.7056	20.7876	22.002	19.5601	21.714	21.9171	21.5261	22.3348	22.2849	22.4196	22.1581	22.5117	25.0062	24.5754	24.6918	24.317	24.1642	24.0359	24.0609	24.1253	23.7182	23.6431	23.8858	23.6865	24.1946	24.5285	25.0401
5-Hydroxyindole-3-acetic acid	2217.17	12.7503	12.8611	12.964	12.7855	12.9012	14.2512	14.6495	15.0868	14.0014	13.8533	15.2175	14.9567	14.6382	14.9613	14.6154	14.9153	14.3786	15.0909	15.1556	16.0124	14.6662	14.8435	16.034	16.1635	16.2156	16.6382	16.8606	17.2877	16.9316	17.2696
Lanosterol	2190.15	17.4656	16.734	17.2967	17.417	16.9882	17.977	17.977	17.977	18.1556	18.2604	18.4252	18.4616	18.4129	17.8423	18.7634	20.6186	20.5356	21.5592	20.9812	20.9812	22.4996	23.3376	23.0821	22.7286	22.8014	22.5846	22.7955	22.6497	22.5869	22.4947
Adenosine-3-monophosphate	2187.42	28.2353	27.9031	27.9705	27.976	27.7771	25.4362	24.9316	24.6811	24.8858	24.558	23.976	24.5404	24.4105	24.7077	24.2607	24.9847	25.1135	24.4362	24.9495	24.5345	23.6649	24.5696	24.1253	24.3376	24.7389	23.7389	23.8093	24.0105	23.391	23.5754
D-(+)-Maltose	2118.8	16.68	16.9431	15.9106	16.3391	16.8484	18.5011	19.4252	19.4991	19.4835	18.4933	18.9714	18.8757	19.0479	19.1801	19.1531	20.1581	20.3211	20.3645	20.417	20.1704	20.5823	20.3857	20.6628	20.5545	20.7307	22.155	22.2244	22.2593	22.3538	22.2302
Mucic acid	2113.57	15.5893	14.9153	14.0532	14.726	15.2061	14.8823	14.8088	13.8138	14.8918	15.4862	16.4544	14.9522	15.2288	16.3216	15.0992	16.582	16.6662	16.5672	16.2859	16.4285	17.1946	17.0426	17.1457	16.7471	16.8113	21.8987	21.7265	22.1734	21.6276	21.9951
Maltitol	2091.93	25.5551	25.5522	25.6237	25.5404	25.4008	25.275	25.0567	25.5225	25.1681	25.3811	23.2679	23.632	23.0592	23.1127	23.5869	21.8346	21.7955	22.2821	21.9495	22.1795	21.0292	20.8346	19.9316	20.8576	20.8576	20.002	20.002	19.4046	20.3857	20.3211
Alpha-D-Glucose-1,6-bisphosphate	2087.64	18.8515	19.0899	18.0638	18.6453	17.6453	16.1965	16.3056	16.435	16.1437	16.3836	15.734	15.5296	15.4767	15.906	15.887	13.8337	14.0276	14.3373	14.0951	13.8435	14.1984	13.8435	14.0617	14.0617	14.0868	13.863	14.0617	13.7099	13.863	13.5142
N-Acetylserine	2084.01	28.1984	28.1652	28.3536	28.459	28.3153	26.8385	26.9428	27.3066	26.976	27.1214	26.3894	26.632	26.5477	26.5898	26.7389	25.0443	24.989	24.9628	24.9088	25.0772	24.4676	24.5225	24.6264	24.5345	24.5696	20.7056	22.5545	21.9672	21.7013	22.4676
Mevalonolactone	2059.61	17.8906	18.4211	18.1556	17.4252	16.8113	17.8361	17.734	18.0691	17.7667	17.9024	20.2419	20.0951	20.1704	20.1704	20.4676	21.5498	21.8113	21.6409	21.8307	21.5404	22.2036	22.2792	21.9916	21.8034	21.9707	19.1679	19.0211	19.0479	19.0821	19.1752
Methylsuccinic acid	2057.77	25.2714	25.2714	25.2926	25.2317	25.2961	26.673	26.5359	25.6595	25.976	25.673	28.9567	28.7864	28.4823	28.4707	28.4976	28.6458	28.2353	28.3578	28.3494	28.3494	28.5536	28.0084	28.0914	28.0557	27.9484	27.9869	28.0965	27.8799	27.8564	28.391
1-Methyladenine	2052.39	16.3391	16.4815	16.4752	16.68	16.275	20.6096	20.7553	20.7471	20.4576	20.3321	21.1581	20.8113	21.3484	20.8802	20.9459	20.6096	20.8651	20.9742	20.7715	21.2244	21.2302	20.6971	20.7876	20.6628	20.8034	20.6971	20.68	20.8876	20.7223	20.68
Lignoceric acid	2047.95	21.4118	21.1206	21.417	21.2933	20.9672	20.7307	20.6628	20.3645	20.002	20.6276	21.0886	23.2679	20.2877	20.8191	20.1581	23.2096	23.1658	24.1719	23.5404	23.48	24.8433	25.6264	25.2535	24.8576	24.9088	23.9672	24.0443	23.848	23.8191	23.7796
3-Phenyllactic acid	2021.91	20.8269	20.895	21.0156	21.0426	20.9742	20.7389	20.9171	21.1642	20.8802	21.1886	19.163	19.1181	19.3815	19.0211	19.5185	18.0691	18.1206	18.3012	18.0899	18.0479	18.2137	17.9488	18.0211	17.9937	17.9142	15.9293	15.9859	15.3615	15.6551	15.9499
S-Adenosylhomocysteine	2007.75	18.5657	18.4815	18.6382	18.5127	18.5127	17.6382	17.8727	17.8846	17.8545	17.9142	16.8727	16.9431	16.8846	16.5326	17.1257	15.7706	15.8238	16.1397	15.9658	15.9223	15.6745	15.6991	15.6745	15.3269	15.913	15.5296	15.4285	15.3373	15.5893	15.4285
Methyl-2-hydroxyisobutyric acid	1969.49	28.4785	28.5203	28.6285	28.8081	28.6251	28.7227	28.906	29.0111	28.8799	28.94	28.4032	28.5463	28.611	28.6146	28.673	26.6458	27.3153	27.3494	27.3992	27.4154	26.604	26.4346	26.5404	26.4567	26.632	24.4551	24.5522	24.7645	25.1449	24.989
Alanine	1883.84	33.212	33.1709	33.2759	33.3568	33.2193	31.8004	32.1146	32.1453	32.1115	32.1177	30.8385	30.8974	30.9677	30.9188	31.0283	30.7453	31.0084	30.9882	30.9188	30.8608	30.4823	30.5203	30.4919	30.5109	30.4433	29.5736	29.6268	29.5014	29.5426	29.5147
4-Pyridoxic acid	1881.9	17.7406	17.5657	19.8144	19.1825	17.6523	19.1257	18.8576	18.5049	18.9229	19.2604	16.9083	18.2696	18.4415	17.8606	18.6488	19.9601	19.7039	19.7422	20.1206	19.8113	19.8876	19.6869	19.7651	19.7373	20.1581	23.1158	23.2679	23.119	23.3101	23.1581
Acetylcholine	1865.63	24.1095	23.7077	24.1488	24.1871	24.1095	24.0105	24.1642	24.1565	24.1095	24.2961	22.3805	22.3484	22.4551	22.5846	22.6051	21.714	21.9061	21.9707	21.7756	21.7756	21.2989	21.1946	21.2877	21.3211	21.4015	20.6453	20.6453	20.5261	20.68	20.5356
Succinic semialdehyde	1831.99	18.786	18.786	18.8392	18.9083	18.6382	16.92	16.977	17.0319	16.9545	16.7471	15.049	14.863	14.8918	15.0617	14.7628	15.8846	15.906	15.5111	15.5296	15.6439	15.9859	16.2061	15.5981	15.4512	15.5204	15.6211	14.0785	14.9476	14.7366	13.863
N-Methylhistidine	1805.76	23.9672	23.867	23.9672	23.5165	23.8576	24.0854	24.0691	24.2317	24.1174	24.317	25.8788	25.6292	25.5926	25.5075	25.4923	26.5898	26.6181	26.3083	26.3729	26.3153	26.5045	26.2785	26.4105	26.2058	26.4122	27.7708	28.0965	28.2262	28.3828	28.3578
Octopine	1800.37	28.2077	28.019	28.0557	28.2445	27.9923	25.8118	25.9847	26.2426	25.8811	25.8191	26.5195	27.1015	27.0401	26.6458	26.6181	27.524	27.4785	27.5826	27.4473	27.5389	26.726	26.4425	25.4769	26.5359	26.7895	21.5117	22.4324	21.6628	22.0054	22.0258
D-Glucose 6-phosphate	1729.56	22.0854	21.7348	21.8538	21.8689	21.7512	21.1269	21.3376	21.1206	21.5777	21.5309	20.7307	21.0951	21.502	21.4375	21.4015	19.6505	19.9742	19.7569	19.4129	19.2442	19.1332	19.113	19.265	19.0047	19.3034	19.1752	18.8606	18.9142	19.2764	18.8331
19-Nortestosterone	1697.89	15.1033	14.9837	15.1984	15.2438	15.1517	16.1417	16.3529	16.3803	16.5188	16.3581	14.4767	14.4512	14.8435	14.9385	15.0014	12.964	13.2091	13.4767	13.4383	13.1768	13.1861	12.9694	13.0802	13.4383	13.3304	10.3443	11.9979	11.9181	11.9586	11.7524
L-Valine	1692.5	37.2372	37.8162	37.2724	37.9086	37.3568	37.5484	37.534	37.1068	37.6388	37.097	37.097	37.1068	37.1453	36.7553	36.8042	35.7099	35.8608	35.797	35.8515	35.4672	35.0832	34.6892	34.5754	34.6892	34.7353	33.8138	33.9063	33.8328	33.9242	33.7751
3-Anisic acid	1670.93	15.8846	16.034	16.3495	16.5356	16.4415	13.0154	13.2378	14.9012	12.7228	12.6073	11.0634	11.4969	15.8012	12.8937	13.1147	10.7649	11.7356	11.5362	11.2761	13.6883	10.8138	12.3608	11.6795	11.7185	12.5362	12.4818	12.8553	12.5817	12.6165	11.9658
Albendazole	1639.95	22.1976	22.2933	22.4576	22.6051	22.5846	24.2535	24.3975	24.2961	24.3975	24.4551	26.1908	25.9316	25.8904	26.2643	26.2714	26.5754	26.726	26.2856	26.3745	26.3187	26.1871	25.8927	25.8528	26.3861	26.341	27.4473	26.9869	27.17	27.3662	27.1604
3-Hydroxyvaleric acid	1632.68	30.4823	30.4727	30.5754	30.4134	30.2422	30.4727	30.6022	30.7129	30.3515	30.2979	30.1842	30.099	30.1604	29.7629	29.7645	28.003	28.2123	28.019	27.509	27.3578	27.8019	27.7195	27.6798	27.2535	27.0505	25.9316	26.0359	25.5551	25.4707	25.317
L-Histidinol	1576.25	24.824	25.3204	25.4298	25.5463	25.5105	25.1015	25.0894	25.2058	25.065	25.1449	24.019	23.9584	24.0275	24.0609	24.019	22.4375	22.6051	22.632	22.882	22.7553	22.1047	22.0559	21.4067	22.2273	22.2792	21.4576	21.6409	21.5961	21.85	21.4067
6-Methyladenosine	1565.32	25.9955	25.9998	25.5135	26.1194	26.0338	25.3778	24.9716	25.4041	25.0854	25.5345	24.1253	23.976	23.7389	22.7223	23.9406	23.5983	23.7182	23.7594	23.5522	23.5522	23.2521	23.0359	22.3511	22.9847	23.391	22.969	23.2821	22.5141	23.5045	23.3376
Sorbitol	1480.14	21.3156	21.1457	20.6628	22.1765	20.8346	20.85	20.4676	20.3211	20.1946	20.4273	22.0054	22.1673	21.9316	21.8307	22.2096	24.8044	24.4614	24.5869	20.6714	24.275	24.5522	24.6153	24.4551	24.2821	24.2317	25.3877	25.4138	18.9686	25.7389	26.0105
Beta-sitosterol	1463.24	18.5165	18.0479	18.1457	19.3034	19.1482	17.786	18.6628	19.0847	18.3878	17.5951	18.5432	19.2349	19.6714	18.7987	19.3211	20.002	19.9742	20.5731	20.5069	20.265	21.1206	21.8191	21.6364	21.5498	21.4221	21.9916	22.3348	22.0918	22.1269	22.0325
Citric acid	1455.74	18.6204	18.6168	18.5915	18.7439	18.6132	19.3857	19.1282	19.4252	19.2855	19.1825	21.0292	20.9601	20.9882	20.9951	21.0224	21.0625	21.4874	21.0821	21.2184	21.3266	21.9243	21.8651	21.7223	21.8461	21.8614	19.8921	19.8238	19.9185	19.9301	19.8034
Valylproline	1444.19	22.8858	23.0071	22.9812	23.2346	22.9725	22.8576	23.1565	23.2214	23.1457	23.2081	21.8269	21.8839	21.9847	21.9916	21.9985	21.0559	21.2707	21.265	21.0821	21.0559	21.1015	21.343	20.9742	21.1332	21.0951	20.0292	20.2184	20.2302	20.3211	20.3645
Gly-Leu	1424.24	28.604	28.5609	28.6527	28.8534	28.604	28.6181	28.94	28.9031	28.8916	28.976	27.0296	27.2714	27.2803	27.2891	27.3494	26.4707	26.726	26.632	26.4908	26.5898	26.5898	26.5682	26.4282	26.4488	26.521	25.7312	25.867	25.6865	25.8528	25.654
N-Acetylputrescine	1374.26	16.1012	16.6662	16.0909	16.1517	16.8238	15.8989	16.528	16.4366	15.8337	16.4544	15.3304	14.8727	14.9926	15.8113	15.5447	17.6937	17.8667	17.6869	17.7923	17.6024	20.5638	20.2066	20.343	20.2535	20.265	18.1257	18.1407	18.1357	18.2604	18.0899
DL-Mandelic acid	1363.25	13.6883	13.4252	13.7099	13.0583	13.4767	15.5775	15.913	16.0297	16.4236	16.346	12.3663	12.5675	12.6119	12.8994	13.0189	15.3304	15.508	15.7207	15.049	15.4831	14.8484	15.7885	15.5951	14.4448	14.3304	13.8337	13.7419	13.3304	13.2333	14.0868
4-Oxoproline	1354.64	19.4435	19.6937	19.6593	19.5049	19.4087	18.3538	18.6488	18.547	18.1507	18.3452	17.8238	18.2137	18.0319	18.0319	18.0102	17.1457	17.6096	17.5805	17.0743	17.0102	16.9316	17.1357	17.0743	16.9083	16.7207	16.9658	17.1053	16.8484	16.9882	16.9882
Cytidine	1350.47	26.6865	27.2535	27.0711	27.3578	26.8385	26.604	26.9539	27.2445	27.189	27.4473	26.3427	25.7286	25.8741	25.433	25.433	24.3511	24.5105	24.6375	24.5983	24.1871	24.3031	24.2021	24.3376	24.4923	24.3376	24.7796	24.7745	24.6264	24.8623	24.6811
N-Acetylneuraminic acid	1346.14	20.654	20.417	20.8576	20.7471	20.9388	18.0265	17.5204	17.5657	17.7273	17.6869	17.0102	17.6869	17.7406	18.4696	18.4536	18.4129	18.7537	18.2604	18.9024	19.1206	18.4456	18.0899	18.6347	18.5049	18.8817	17.9373	17.9316	17.8484	18.0319	18.0743
D-Alanyl-D-alanine	1332.34	23.4551	23.5638	23.5045	23.6649	23.391	23.3376	23.6209	23.6209	23.6431	23.632	22.1015	22.1795	22.2564	22.3725	22.4247	21.8576	22.2564	22.0983	21.9951	22.0723	21.7307	21.7471	21.7389	21.7796	21.7715	20.4375	20.5915	20.4576	20.7715	20.68
gamma-Glutamyl-gamma-aminobutyraldehyde	1330.15	18.2372	18.3233	18.3538	18.4736	18.2604	17.6382	18.0047	18.0047	17.805	17.8606	16.4528	16.7987	16.6662	16.68	16.4672	16.0722	16.034	16.0971	15.8965	16.0447	16.4752	16.6662	16.2732	16.2061	16.1517	15.1477	15.5746	15.2175	15.2913	15.0102
Kynurenic acid	1242.8	22.2792	23.4298	23.6209	23.4551	22.8171	23.417	23.2021	23.2096	22.823	22.6843	22.1642	22.1825	22.1143	21.5731	21.4324	20.6364	20.8423	20.9742	20.2877	21.1765	20.5638	20.5261	20.714	20.2764	19.9882	21.002	21.002	20.6276	20.4874	19.8712
Uridine-5-diphosphoacetylglucosamine	1240.23	25.9517	25.9383	25.8858	25.772	25.6096	25.5609	25.2353	25.1908	25.1332	25.1135	24.5812	24.2679	24.3578	24.2607	24.0609	23.7389	23.4923	23.6209	23.7389	23.5165	23.5522	23.4425	23.2821	23.6096	23.4041	21.3101	21.8538	21.9742	21.5213	21.8461
Nicotinamide	1223.08	22.9795	22.9812	23.3239	23.0902	23.3645	22.6736	22.7935	22.928	22.7035	22.6475	22.502	22.2961	22.5117	22.4451	22.4298	20.2877	20.4067	20.3857	20.3321	20.3101	20.4067	20.1206	20.0821	20.2989	20.4874	17.2042	17.9882	17.2232	18.4087	17.7073
Prostaglandin B1	1221.68	19.2326	19.4025	19.343	19.4933	19.3645	19.9459	20.2066	20.0951	20.2989	20.1332	18.724	18.7373	18.8545	19.0795	18.9345	18.7892	18.9083	18.9112	18.8787	18.786	19.1874	18.8207	18.9142	19.0532	19.1432	16.6053	16.7207	16.7987	16.7987	16.5849
Glucose-1-phosphate	1216.68	29.1507	29.0401	29.1386	29.0788	28.9732	28.3828	28.4862	28.5052	28.362	28.463	28.1556	28.0137	28.1214	28.0401	28.0401	26.9203	27.0813	26.965	26.9203	26.7645	26.9316	26.9316	26.8858	26.8264	26.7129	26.2926	26.3992	26.2821	26.3926	26.2021
N,N-Dimethylarginine	1199.04	28.8324	28.8173	28.8711	28.976	28.6663	29.1507	29.3174	29.2262	29.2308	29.3346	30.6458	30.6372	30.6881	30.6881	30.6458	30.9259	31.0609	31.015	30.9188	30.8385	31.08	31.0084	30.8755	30.94	30.9259	31.0737	31.1724	31.0544	31.1483	31.015
2-Hydroxymyristic acid	1195.16	16.6382	16.5864	16.9992	16.9658	16.7987	15.8113	15.9792	16.2137	16.0189	16.365	14.4186	14.1437	14.4893	14.8188	14.5567	14.183	14.4956	14.1517	14.1196	14.2512	13.7524	14.1033	14.2805	13.9748	13.7731	11.7056	12.3718	12.1293	12.7035	11.3332
Inosine	1185.44	15.7287	15.6125	15.691	15.8894	15.7366	16.0511	16.3769	16.1811	16.3667	16.4862	16.5642	16.185	16.4252	16.3039	16.464	17.4815	17.7471	17.6869	17.68	17.3581	18.1898	18.1407	18.0265	17.9024	17.8484	19.3079	19.0873	19.0372	19.0585	19.0211
4-Hydroxyphenylacetic acid	1182.21	20.9316	21.1704	20.5356	20.7056	20.953	20.3857	20.2184	19.9882	20.2184	19.6903	19.4293	19.197	19.4067	19.1206	19.3516	18.4933	18.3752	18.1898	17.9826	17.8361	17.4576	17.7537	17.7471	17.3145	17.1053	16.7602	16.528	16.9545	16.5981	16.8727
D-Erythrose 4-phosphate	1174.35	17.1457	17.2137	17.3836	17.2696	17.185	17.3233	17.2326	17.3145	17.2696	17.2232	17.0102	16.9083	16.9545	17.0319	16.7602	16.1135	16.0722	16.0211	16.0383	16.0189	15.4672	15.4415	15.2769	15.0826	15.3987	14.3233	14.464	14.365	14.3092	14.1277
Pipecolic acid	1162.82	23.5983	23.5754	23.7077	23.848	23.7594	23.6971	23.8288	23.7492	23.7182	23.7077	23.8764	24.019	24.0275	24.0772	24.1174	22.3565	22.7574	22.4947	22.5892	22.4118	21.9707	21.8839	21.9243	21.9495	22.1079	21.2989	21.3538	21.2419	21.343	21.2302
alpha-D-Mannose 1-phosphate	1160.69	21.4476	21.3538	21.4324	21.3699	21.3211	20.7553	20.7876	20.7955	20.68	20.7796	20.5451	20.3538	20.4972	20.3857	20.4067	19.3034	19.4576	19.356	19.2489	19.1825	19.343	19.3299	19.2232	19.2042	19.1206	18.5507	18.6971	18.5805	18.6593	18.4616
3,6-Anhydro-D-galactose	1154.7	20.8113	20.5165	20.3211	20.4972	20.6364	19.4516	19.586	19.1777	19.2877	19.1028	19.4025	19.0047	19.3773	19.1028	19.1257	18.4854	18.4046	18.0426	18.0899	17.92	18.1605	18.2922	18.3408	17.7602	17.6869	16.6937	16.5522	17.1053	17.0847	17.3752
gamma-Glutamyl-gamma-aminobutyraye	1153.74	17.3056	16.0362	17.4815	17.4893	17.3752	16.5417	16.8846	16.7073	16.4269	16.5849	14.6268	14.8965	14.7471	14.3443	14.4576	13.8337	14.1033	13.4512	13.7313	13.8238	14.5627	14.1596	13.8337	13.9106	13.8823	13.1244	13.2703	12.9819	13.0532	12.8765
Glutamine	1139.78	33.0332	33.0398	33.1177	33.1634	33.0927	30.8309	30.9259	30.933	30.9045	30.9814	31.5109	31.5109	31.5664	31.5799	31.5664	30.5664	30.5844	30.5933	30.5664	30.5014	30.7927	30.7692	30.7533	30.7613	30.7129	30.9882	31.0084	30.9882	31.0283	30.995
Fructose-6-phosphate	1138.24	27.2262	27.0711	26.7771	26.8385	26.8858	26.6998	26.7129	26.7645	26.7389	26.9203	25.9781	26.143	26.0443	26.0484	26.2372	24.9803	24.9406	25.2426	24.7077	24.5463	24.4738	24.3239	24.4425	24.6431	24.558	23.3778	23.3511	23.48	23.7895	23.8576
Sarcosine	1130.74	34.0911	34.0592	34.0911	34.212	34.0592	33.2479	33.3303	33.3436	33.3436	33.3169	32.5109	32.525	32.555	32.5686	32.648	32.4775	32.5956	32.499	32.5732	32.4159	32.2393	32.1392	31.9505	32.099	32.1269	31.3463	31.4284	31.3724	31.4032	31.3303
2-Hydroxy-4-methylpentanoic acid	1119.7	29.7211	29.6781	29.7129	29.5573	29.3889	30.0084	30.0609	30.1842	29.8019	29.9117	29.8339	29.6865	29.7195	29.4194	29.4254	28.9117	29.0349	28.9344	28.5165	28.4473	28.8019	28.5609	28.5203	28.17	28.17	26.4707	26.9088	26.6595	26.6595	26.4057
N-Acetyl-DL-glutamic acid	1077.54	20.0951	20.002	20.1332	20.343	19.9882	18.8175	19.1181	19.0399	19.1605	19.1155	17.8361	17.9826	17.7923	17.9431	18.1155	17.68	17.8238	17.9545	17.9714	17.805	19.0717	18.8817	19.1282	19.0319	18.9402	17.5805	17.6096	17.528	17.6024	17.4893
11-Alpha-Hydroxy-17-methyltestosterone	1065.48	17.1752	17.1357	17.4576	17.4576	16.8727	17.6937	17.9937	18.1556	18.0047	18.1507	17.3408	17.3752	17.6731	17.417	17.3752	15.9431	16.2931	16.4464	16.2549	15.968	16.0722	16.0014	15.4831	16.2419	16.2175	13.0668	13.8533	13.4512	13.8823	13.6773
2-Hydroxyhexanoic acid	1048.04	19.2604	19.4576	18.9054	19.1752	19.3516	19.9459	19.597	19.4456	19.6697	19.3667	19.1257	18.9573	19.2764	18.7471	19.1332	17.68	17.1155	17.1752	17.4252	16.9545	17.5432	17.5432	17.4656	17.392	17.0638	15.3615	15.1196	14.92	16.1635	15.9454
Nicotinic acid	1028.68	24.239	25.0772	25.5898	23.1976	24.3101	24.7594	25.8457	24.7543	24.6209	25.1135	29.267	29.2077	29.3303	29.0762	29.141	30.6964	30.9188	30.947	30.8974	30.7849	30.4134	30.0864	30.393	29.995	30.3515	30.1483	30.1842	29.7802	29.8945	29.7276
5-trans Prostaglandin F2beta	1013.09	16.8846	16.5731	17.2232	16.8606	16.7073	17.8906	18.0743	18.2184	17.8787	18.1994	16.2042	15.6828	16.093	16.3426	16.494	14.9882	15.3373	15.1033	15.2288	14.906	15.2841	15.2363	15.2363	15.1908	15.1357	11.9586	12.7607	12.2438	12.9403	12.3853
Glycylproline	1004.81	19.7439	19.7844	19.7439	19.8034	19.654	19.7471	20.2302	20.0559	19.9742	20.1704	18.4211	18.4456	18.5657	18.5242	18.4815	18.0426	18.209	18.1655	17.7207	18.0102	17.9024	18.2466	18.0899	18.1053	17.68	17.3752	17.7537	17.3581	17.7207	17.2232
Uridine-5-diphosphoacetylgalactosamine	1003.96	28.1361	28.1312	28.2308	25.9134	25.1565	27.6458	27.8623	27.7708	24.9539	24.2891	26.8142	27.0084	26.8623	27.1115	26.9869	26.2225	26.4441	26.512	26.4831	26.2643	25.9825	25.9203	25.8927	25.9293	23.1472	25.6209	25.5135	25.4707	23.0037	22.2448
N-Acetyl-D-lactosamine	999.343	14.1984	14.5387	14.5142	14.8138	14.183	16.4464	16.3495	16.435	16.624	16.4972	18.1556	18.0795	18.1257	18.2696	18.2604	17.4736	17.6168	17.68	17.6024	17.6523	16.7987	16.8606	17.0319	16.9882	16.9658	16.5018	16.494	16.5731	16.624	16.0722
Carbaprostacyclin	996.317	16.8727	16.8484	17.1946	16.786	16.9882	17.0102	17.3056	17.2137	17.3145	17.2787	15.4925	15.1556	15.6495	15.5922	15.6125	15.7471	16.093	16.1536	16.0124	15.8846	16.4071	16.2156	16.2586	16.3836	16.2288	14.4831	14.6991	14.4831	14.6607	14.4893
N-acetyl-d-hexosamine	970.057	20.6096	20.8113	20.3857	20.3752	20.4375	20.9601	20.8346	20.68	20.7389	20.7553	20.2877	20.1704	20.3857	20.1206	20.265	19.4087	19.3962	19.1874	19.0102	18.9798	19.3962	19.4191	19.5375	19.2442	19.2279	17.1053	17.0743	17.4496	17.5049	17.6731
Ribose	969.445	25.8741	25.7543	21.7265	25.8927	25.9338	22.7161	22.4701	22.4626	22.5189	22.2302	22.8614	22.7614	22.9847	22.7675	23.0207	25.4073	24.9933	25.1214	24.7543	24.6918	24.4362	24.4984	24.5926	24.2244	24.141	24.3645	24.2244	24.6703	25.0484	25.5165
Acetohydroxamic acid	949.985	27.9031	27.9428	28.019	28.1795	27.965	27.8623	28.0813	28.019	28.1312	28.0914	26.558	26.7129	26.7771	26.5898	26.632	26.0772	26.3562	26.2335	26.2058	26.0813	25.9672	25.9955	25.6944	25.8881	25.9271	25.6944	25.8142	25.705	25.8647	25.6209
Phosphoenolpyruvate	907.963	14.4318	14.1752	14.0189	14.2438	13.6325	15.3547	14.9339	13.9476	14.5387	14.5387	15.9658	15.4186	14.6828	14.1033	15.0575	15.8188	15.5356	14.9567	15.2288	14.7783	16.5507	17.1053	17.0211	15.9246	15.8287	18.4375	18.0847	18.6937	18.1605	18.5011
Melezitose	905.686	18.9798	19.209	18.1946	18.8757	18.1946	18.8392	19.0211	18.7439	19.0951	18.7987	17.68	18.0156	18.0265	18.1307	18.1104	16.8846	16.9658	17.1556	17.2604	17.2137	16.456	16.5447	16.3495	16.5477	16.6382	15.624	15.5981	15.464	15.6354	15.726
Lactic acid	884.864	28.6355	28.5463	28.1604	28.4234	28.6898	28.0137	27.9923	27.8682	28.1065	28.1556	27.5969	27.5826	27.9595	17.1457	27.7581	28.4394	28.2399	28.1556	28.6355	28.0965	27.5315	27.4073	27.3745	27.8799	27.3662	24.8142	25.065	24.8191	26.1234	25.5014
N-alpha-L-Acetyl-arginine	879.514	21.1079	21.1704	21.3156	21.3805	21.3857	20.1581	20.3857	20.4874	20.1457	20.2184	20.0821	20.0559	20.3211	20.3321	20.3321	19.575	19.7747	19.5713	19.816	19.4696	20.2302	20.1825	20.0821	19.9882	19.9459	18.4375	18.5582	18.4087	18.606	18.4854
Glu-Gln	877.283	22.9171	23.1856	22.9777	23.2214	23.0999	21.265	21.8423	21.9812	21.9882	22.0918	17.7207	19.5337	19.7907	19.7022	19.6168	19.6114	19.0769	20.3101	18.3101	20.1825	19.4395	19.6329	20.1825	20.4067	20.0691	20.7876	18.6766	18.8423	20.5823	19.9742
Prostaglandin F2alpha 1,9-lactone	873.85	18.3495	18.2741	18.4656	18.724	18.5582	19.1104	19.3495	19.3731	19.4314	19.4696	18.0585	18.2787	18.5088	18.3233	18.3667	17.7406	17.9373	17.9488	17.9142	17.9373	18.4004	18.1946	18.2967	18.3233	18.4656	16.0014	16.4137	16.3443	16.582	16.3937
L-Aspartic acid	869.055	28.4551	28.4823	28.509	28.6998	28.4823	28.3153	28.6424	28.4862	28.6181	28.5754	30.5933	30.7047	30.6964	30.6964	30.7373	30.2422	30.4823	30.3724	30.3515	30.2647	29.9117	29.8234	29.7178	29.7676	29.7755	29.6915	29.6798	29.6216	29.7146	29.6865
P-Anisic acid	869.046	24.0609	24.2891	24.5345	24.2821	24.1095	22.3805	22.5451	22.6584	22.4751	22.0658	21.7182	21.5117	22.6757	19.3794	21.5404	21.7915	22.2905	22.417	22.019	22.8034	22.0951	22.1916	22.1825	22.6342	21.6231	23.5869	22.8557	23.0292	22.8073	22.6164
15-Deoxy-12,14-prostaglandin A1	865.935	21.2361	21.3101	21.4375	21.5592	21.4923	21.9316	22.1174	22.1856	22.1916	22.2006	20.7471	20.68	20.9812	21.0359	21.0951	20.8034	20.9672	20.8802	20.895	20.9024	21.3592	21.2184	21.2707	21.3962	21.4324	19.2809	19.4696	19.4025	19.5127	19.4129
Ala-Ile	863.582	27.2077	27.1604	27.2445	27.2445	27.0609	28.0557	28.3578	28.2308	28.249	28.1984	26.2732	26.275	26.2732	26.4105	26.4583	23.4923	26.1738	26.0588	25.9847	25.9933	26.0127	26.0148	25.945	26.0526	25.9803	25.3477	25.4769	25.3811	24.8433	25.4138
N8-Acetylspermidine	860.176	18.0585	18.0899	18.5432	18.5088	18.2326	17.7987	17.8545	18.0319	18.0319	18.2832	18.4536	18.714	18.3189	18.5507	18.6593	18.4616	18.5165	18.4252	18.265	18.7307	20.002	20.3538	20.5261	20.4273	20.5451	19.9882	20.2302	19.9459	20.1946	19.9882
alpha-Keto-gamma-(methylthio)butyric acid	854.981	28.459	28.217	28.2891	27.976	26.4877	28.1747	28.3662	28.3662	27.0084	27.8799	22.7655	22.7836	24.1565	23.4676	23.6757	25.0526	25.2244	24.9716	24.4923	24.3778	25.0443	24.8288	23.7695	24.0275	24.0772	22.632	21.9916	21.4626	22.7915	21.7634
gamma-Glutamyl-glutamine	844.699	26.5898	26.3695	26.2979	26.3545	26.3595	26.2996	26.509	26.5165	26.4661	26.4645	25.0854	25.4298	25.3511	25.2785	25.3066	24.9495	25.002	24.8717	24.7286	24.989	24.9716	25.0854	24.7645	24.8044	24.9933	24.0609	24.2821	24.1642	24.391	24.1642
N-acetylgalactosamine	830.872	18.5582	18.6276	18.2279	18.3962	18.606	20.68	14.1674	20.417	20.4375	14.0701	20.8802	20.8802	20.8876	20.7715	20.9024	20.417	20.1704	20.1332	19.6593	19.6488	19.7123	19.6293	19.6435	19.2137	19.2279	17.7406	17.6937	18.0319	18.0951	18.1655
O-phosphoserine	830.241	24.3101	24.2463	23.6096	23.6757	23.8093	23.6757	23.4551	23.1886	23.1946	23.1901	22.4576	22.4298	22.2155	22.0224	22.2535	21.8802	21.714	21.3645	21.3857	21.3101	22.3936	22.7614	22.6518	21.6929	21.7995	22.9334	22.8538	23.4041	22.867	23.2288
3-Hydroxyphenylacetic acid	802.542	22.3565	22.7286	22.1395	22.7161	21.1886	23.4298	23.9406	24.1565	24.1174	24.1795	21.1143	21.4425	22.0592	21.68	21.7471	23.2375	23.7077	23.9933	23.7389	23.7492	23.2679	23.895	23.5404	23.0625	23.48	21.6757	22.3211	20.9388	22.1765	22.6886
Indole-3-acetic acid	799.996	17.9373	17.7667	17.9545	17.9431	17.9826	19.6628	19.7892	19.6731	19.6766	19.7257	18.4252	18.5582	18.3667	18.4576	18.4004	18.9345	19.1307	19.0612	19.0585	18.9909	18.5951	18.6903	18.7731	18.7471	18.5242	20.1206	20.2535	20.3101	20.2764	20.2066
N-Methylproline	798.651	31.6372	31.6586	31.7252	31.8234	31.6713	31.6713	31.7652	31.846	31.8157	31.8608	31.9746	32.0381	32.0769	32.1483	32.225	30.7292	30.9045	30.8901	30.8234	30.7927	30.4727	30.4134	30.4134	30.3303	30.4032	29.6948	29.7692	29.7227	29.8623	29.7357
Asp-Phe	792.881	25.0148	24.8717	24.9628	25.1253	24.895	25.4984	25.8904	25.8997	25.7415	25.8741	23.3511	23.5983	23.6096	23.867	23.6649	23.9134	24.0359	24.1174	23.7182	23.8858	23.9847	24.1871	23.7995	23.848	23.9316	23.3511	23.867	23.5983	23.9043	23.5404
L-Histidine	787.916	27.7389	27.7771	27.8741	27.8858	27.6798	28.1604	28.341	28.4113	28.2935	28.362	27.6181	27.6931	27.6931	27.8324	27.8081	25.965	27.8623	27.5165	27.6389	25.9203	26.0567	25.9338	25.7619	25.8312	26.0359	25.9606	26.0609	25.9361	26.0275	25.8433
Cytidine 5'-monophosphate	786.106	16.6382	18.0372	17.7406	18.4854	17.9826	16.7073	16.9882	16.68	16.9316	16.5127	13.3581	14.0362	14.6325	14.5922	14.6382	13.9748	14.8775	14.9385	14.5507	14.6937	14.5567	14.1674	13.5864	14.0785	14.5018	13.8435	14.0447	14.1517	14.3304	14.2061
L-Ergothioneine	775.296	28.6831	28.6663	28.7958	28.8474	28.6075	29.6303	29.8035	29.8489	29.7341	29.8096	30.94	30.9259	30.9882	31.0737	31.0349	30.393	30.5573	30.5573	30.4727	30.4032	30.2422	30.1361	30.1239	30.1604	30.1483	30.2869	30.3724	30.2979	30.3828	30.2647
gamma-L-Glutamyl-L-glutamicacid	770.188	15.3163	15.0145	15.3408	15.4383	15.1236	14.768	14.9385	15.1946	15.0951	15.24	11.9766	13.6096	13.0241	13.0276	13.1357	13.1437	13.9106	13.464	12.9421	13.2761	12.8317	12.9106	13.0549	13.1373	13.1752	12.4919	13.0498	12.7419	12.3498	12.6119
L-Alanyl-L-proline	764.496	22.2184	22.2792	22.2184	22.4476	22.1825	22.2096	22.5117	22.6006	22.5592	22.5662	20.8576	21.2302	21.2764	21.2707	21.3211	20.9882	21.1886	20.6886	21.0426	20.714	20.7634	21.1395	20.7634	20.8113	20.8191	20.0691	20.3538	20.5823	20.6006	20.2419
Ala-Leu	759.518	30.7849	30.8081	30.8901	31.0217	30.7927	31.4775	31.7573	31.7088	31.6415	31.7047	29.9539	29.94	29.8901	30.0864	30.0084	29.7341	29.7973	29.6964	29.6424	29.6005	29.6798	29.6898	29.524	29.6128	29.5389	29.1795	29.3346	29.2123	29.3388	29.1984
Stigmasterol	756.681	16.5356	15.7046	16.7987	17.0743	17.0319	16.3356	16.8238	17.3495	17.0102	16.5805	17.417	16.5234	16.786	16.093	17.4334	17.6937	16.7602	17.9601	17.786	17.9316	18.4815	19.2302	19.1257	18.805	18.8113	19.6311	19.8772	19.5951	19.6783	19.5165
pyrophosphate	753.099	24.7182	24.8044	24.4425	24.7995	25.1833	24.3031	23.9134	23.8858	24.1253	24.0691	23.5638	23.4041	23.9043	23.3101	23.4041	23.48	23.0983	22.8858	23.4425	23.0625	23.5165	23.848	23.867	23.5522	23.1565	21.5915	21.3484	21.8689	21.5213	21.6584
N3,N4-Dimethyl-L-arginine	743.543	21.0292	19.2989	20.6096	20.2302	20.6006	21.3266	21.6628	21.4526	21.5165	21.5685	22.7655	22.7935	22.8913	22.9098	22.9207	23.1642	23.2679	23.1991	23.2405	23.1174	23.2535	23.1332	23.1642	23.1901	23.2679	23.214	23.3239	23.2419	23.3239	23.3376
S-Lactoylglutathione	739.995	11.9476	11.3934	11.3663	11.6303	11.4357	13.0818	13.1861	12.8474	13.5265	13.5981	15.6211	16.8846	16.4592	16.624	16.5234	15.9246	16.0447	16.5372	16.0405	16.6523	15.508	15.7628	15.2769	15.2213	15.68	13.2015	13.7207	13.0868	13.8138	13.0447
N-Acetyl-alpha-D-glucosamine 1-phosphate	727.824	18.9024	18.7537	19.4354	18.1257	17.8238	19.5526	19.8712	19.4293	18.8995	20.7955	15.412	15.6855	15.5447	15.8386	17.9488	18.4696	14.8088	18.8515	12.9996	12.9403	18.2184	18.1507	18.0847	17.8113	17.9658	12.964	14.1277	17.4087	17.3752	17.4415
8Z,11Z,14Z-Eicosatrienoic acid	725.396	18.9431	19.1898	19.2396	19.0506	19.1181	19.2184	19.5988	19.4025	19.4435	19.5489	18.5356	18.4736	18.3962	18.6168	18.5842	17.3752	17.6937	17.4415	17.6096	17.5731	17.805	17.9373	17.7796	17.9826	17.9488	16.9431	17.1053	16.8965	17.185	16.9882
S-Methyl-5-thio-D-ribose1-phosphate	713.217	15.392	15.1713	15.3512	15.4893	15.4736	15.2913	15.6039	15.4767	15.435	15.5627	17.2877	17.4334	17.4496	17.3581	17.392	16.6039	16.734	16.734	16.9431	16.734	16.734	16.5761	16.5716	16.6937	16.8238	16.1536	16.0826	16.0469	16.0554	16.0992
5-Aminovaleric acid	696.058	23.0674	23.3511	23.1612	23.2821	23.0156	23.4425	23.6431	23.654	23.5165	23.5869	22.9334	23.0641	23.1253	23.1441	22.9061	22.4247	22.7935	22.5708	22.5754	22.5189	22.0393	22.4676	22.2764	22.0854	22.2564	21.0493	21.417	21.1457	21.2877	21.1206
Mannitol	690.762	22.5333	22.867	23.1063	23.1238	23.2375	23.0309	23.8191	23.3511	23.6096	23.5754	24.2244	25.1604	24.5225	24.7594	24.7695	24.2535	24.7543	24.6264	24.918	24.9847	24.3307	24.391	24.5165	24.9716	24.9672	22.6253	22.4526	22.44	22.7856	22.7119
N-Acetyl-alpha-D-glucosamine	676.645	17.7005	16.4512	16.8846	17.3233	17.2232	18.8697	19.6852	18.6276	19.3386	19.2581	20.3645	20.3962	20.265	20.3962	20.1825	19.9882	20.0292	19.92	19.8921	20.002	19.8861	19.8003	19.6006	19.5261	19.7005	18.2042	18.8515	18.2604	18.3836	18.6168
N-Acetyl-L-phenylalanine	674.128	14.8965	14.7834	14.8435	14.9106	14.887	13.8727	13.9293	14.0785	13.9385	13.9106	12.6773	12.8297	12.9567	12.8297	12.8238	12.6684	13.0032	12.9837	12.6904	12.7334	13.0327	12.905	13.0345	12.9549	12.9458	13.6991	13.7207	13.6991	13.6991	13.7524
Aconitic acid	673.707	24.0772	21.8802	22.3184	21.953	21.7098	23.9134	23.9672	23.9406	23.8764	23.848	25.2714	25.0894	25.1908	25.0148	25.0275	25.2244	25.4266	25.2961	25.3307	25.239	25.8069	25.654	25.6918	25.7895	25.654	23.9225	23.9225	23.7995	23.9134	23.7895
Guanosine monophosphate (GMP)	672.54	16.8113	15.9036	16.6082	16.977	16.1277	14.1277	14.1437	14.2949	14.2732	14.1517	11.3049	12.6904	12.4944	12.8803	13.1923	13.2848	13.2015	13.1049	13.3443	13.1115	12.6773	12.279	12.2732	11.9181	11.8098	12.5459	11.9144	11.9549	11.4615	11.3554
alpha-Aspartylphenylalanine	662.314	17.4252	17.2326	16.7602	17.5432	16.786	17.7923	18.1655	18.2326	17.92	18.0795	15.7233	15.8654	15.9153	16.3547	15.959	16.1811	16.2175	16.2156	16.1196	16.2307	16.3304	16.5326	16.2931	16.1615	16.2307	15.464	16.2363	15.8287	16.3003	15.8775
2'-O-Methyladenosine	651.15	18.0426	18.3189	17.5356	18.3752	18.0047	17.786	18.0372	18.4656	18.6662	18.3056	16.6068	16.8113	15.9223	16.9992	17.4415	15.5567	15.4767	15.4219	15.8823	15.863	15.6523	15.1317	15.4285	15.8823	16.1377	15.4987	15.3718	15.6718	15.7961	16.1694
Maltol	632.521	21.0625	21.2535	22.1642	21.6276	21.8764	20.9316	21.1457	21.0691	20.9171	21.1519	19.3473	19.9742	20.0292	20.3211	20.1825	19.5823	19.8034	19.4395	19.2255	19.3211	19.4736	19.3731	19.5915	19.1728	19.0873	18.9083	19.0691	19.2419	19.2764	19.3452
Beta alanine	631.266	24.1642	24.3101	23.8764	24.0609	24.0772	23.632	23.4298	23.2155	23.417	22.9916	23.6865	23.5754	23.5983	23.391	23.6431	22.0526	21.7796	21.5915	21.4874	21.2707	22.2877	22.3962	22.3857	21.9637	21.8034	21.8802	21.4626	21.9637	21.6141	21.9495
Acetylarginine	630.046	22.5754	22.5869	22.5961	22.6929	22.6096	21.7876	21.9459	21.8034	21.9672	21.9637	21.9024	21.9316	21.9352	21.9882	22.0292	21.8689	21.9243	21.8346	21.9459	21.9134	22.5754	22.3645	21.8385	22.5189	21.9742	20.5165	20.4874	20.4972	20.5545	20.4067
Nicotinamide adenine dinucleotide (NAD+)	625.746	17.1556	16.9882	17.0847	17.1946	17.2232	14.5805	14.7834	15.1357	15.1236	14.5567	13.6991	14.2061	14.9567	14.9293	14.2288	14.8582	14.6154	15.0868	14.8238	15.2913	15.4415	15.6154	15.6964	15.4956	15.6745	15.5049	15.7153	15.5951	15.5537	15.4544
Isoleucine	623.872	29.0531	29.2445	28.8653	29.1361	29.1771	28.8887	28.6865	28.8445	28.7645	28.6458	27.0296	26.8858	27.1984	26.8504	27.2803	27.0711	26.5507	26.7129	26.6181	20.002	17.9992	26.7645	26.48	18.0426	20.0821	26.2803	26.2589	26.7517	26.5315	27.1795
L-Glutamic acid	597.332	25.5783	25.5696	25.6971	25.5926	25.4892	24.5165	24.7695	24.7286	24.6375	24.5638	24.0935	24.0275	24.0691	24.1565	24.1253	23.7389	23.9043	23.848	23.7695	23.6649	23.7695	23.6757	23.7182	23.6757	23.895	25.2058	25.1604	24.9803	25.0443	24.9847
Inosine-5'-monophosphate	589.281	19.2466	18.9287	18.9965	18.9345	18.8667	19.8003	19.9459	19.6714	19.6505	19.734	20.7634	20.7307	20.5823	20.654	20.654	20.8113	20.8191	20.6886	20.5261	20.6364	20.6628	20.5545	20.5261	20.6453	20.6186	19.2349	19.2279	19.3034	19.0743	19.1181
alpha-Methylhistidine	580.443	23.8093	23.2006	23.1658	23.1519	23.48	23.2821	24.1488	23.7695	23.8576	23.632	25.4862	25.1908	24.1946	25.6865	25.5667	24.8997	26.2553	26.4266	26.5195	26.3612	26.0148	25.8312	25.5404	26.976	26.726	26.1927	24.7492	24.8858	25.2133	25.2785
5,9,12-Octadecatrienoicacid	573.282	20.5451	20.6186	20.7955	20.7389	20.6276	22.019	22.2679	22.2006	22.2096	22.2736	21.3805	21.2477	21.2477	21.3045	21.391	20.4476	20.6186	20.3857	20.4375	20.3752	20.417	20.417	20.1704	20.5356	20.417	19.6488	19.9601	19.83	19.9601	19.7939
Urea	565.995	16.6662	17.7471	17.6937	17.83	18.0532	18.4415	22.0886	18.0691	18.1704	17.8423	21.502	22.5189	18.8331	21.9352	21.0691	21.5638	22.5892	21.1765	21.4526	22.0156	21.5545	24.5869	18.7569	21.5915	21.5309	20.7223	17.392	18.562	21.2125	18.3277
cis-4-Hydroxy-D-proline	557.213	19.2279	19.2718	19.3343	18.528	19.3473	19.3167	19.4636	19.3773	19.4232	19.4252	20.1825	20.2764	20.265	20.2989	20.2877	19.0743	19.1231	18.8817	19.0899	18.9112	18.1457	18.0638	17.3233	18.1307	18.2042	17.7602	17.392	17.6382	17.4972	17.6869
Cystine	554.342	18.9826	18.9142	18.7764	18.9229	18.9229	20.1704	20.0156	19.9459	19.6937	20.002	17.9258	18.5432	18.185	18.1307	15.1074	18.2604	18.0743	18.3145	18.1104	18.0156	17.8545	17.7471	17.8113	17.5657	17.6937	17.8238	17.7923	17.8484	14.6551	18.3452
N,N-Dimethylglycine	553.988	25.5045	25.2535	25.3745	25.4457	25.1214	23.1765	22.7816	22.5069	23.0409	22.1395	23.6649	24.3511	24.3376	24.1015	24.0935	25.4073	25.6209	25.7619	25.3645	25.5463	24.7441	24.8044	24.5165	24.3239	24.8528	22.4273	24.3031	23.6649	24.0609	23.2006
Xanthine	551.562	21.895	22.2621	21.8839	21.9316	22.1206	22.3348	22.3045	22.1765	22.0526	21.9951	21.4375	21.5261	21.5685	21.3752	21.6364	20.5069	20.2419	20.9388	20.1946	20.1206	19.8787	19.8697	19.9742	19.9083	19.7955	19.6114	19.503	19.6645	20.1704	20.3211
Pyridoxal	539.911	19.7747	19.7955	19.8423	19.9185	19.7356	19.0585	19.3473	19.356	19.1002	19.0951	18.7667	18.5951	18.2232	18.7504	18.6523	18.4893	18.7073	18.5731	18.4933	18.3101	18.0743	17.7796	18.0047	18.1507	18.0156	17.4815	17.786	17.392	18.3189	17.8906
Indole-3-carboxylic acid	532.491	21.5356	21.895	21.6971	21.5356	21.1946	21.0951	20.9024	21.2361	20.265	20.3538	21.002	20.5731	20.5731	20.2419	20.1704	21.2593	21.3857	21.9243	20.9951	20.9882	21.8307	21.7512	21.6929	21.1395	21.0886	24.417	24.7129	23.5869	24.3101	24.002
N-epsilon-Acetyllysine	532.316	30.5573	30.4823	30.6881	30.5481	30.611	31.0479	31.2193	31.0737	31.08	31.0479	29.8974	29.8887	29.9814	29.8653	29.9259	29.7802	30.0217	29.9117	29.8127	29.7818	30.341	30.3196	30.1483	30.3196	30.2308	28.9677	29.1164	28.9287	29.1214	28.8653
Homoserine	527.202	19.2627	19.7955	19.4293	19.4991	20.1332	16.9882	15.7576	18.2832	17.2604	17.1655	21.1886	20.1825	21.1765	20.6096	20.8191	20.265	19.5564	19.8591	20.2989	19.2419	16.6382	16.624	15.7099	19.9601	19.1898	19.1777	19.4334	20.1079	16.734	20.1457
Phosphoethanolamine	519.526	27.3324	27.341	26.965	27.0813	27.2077	26.673	26.4723	26.3811	26.3662	26.3712	25.8167	25.6595	25.7077	25.5433	25.6513	25.3645	25.2499	25.0813	24.9628	24.8044	25.1757	25.4457	25.3844	24.7543	24.7286	25.0526	24.9406	25.3975	25.0526	25.48
3',5'-Dimethoxy-4'-hydroxyacetophenone	517.5	10.1033	13.6883	12.5142	10.2527	10.9069	11.0835	10.2408	10.2992	13.2556	10.3554	10.4919	11.2408	10.3772	10.1674	10.1548	14.7834	16.1576	18.0102	15.8037	14.0951	13.5981	10.1674	10.0768	10.2167	13.8533	10.7731	10.0768	10.1421	10.1421	9.98014
GABA	501.707	19.3167	19.197	19.4129	19.1605	18.9992	18.4736	18.4456	18.4252	18.3752	18.5049	17.7667	17.714	17.7923	17.714	17.6593	17.7207	17.7005	17.7273	17.5432	17.5731	17.5878	17.5356	17.3321	17.3056	17.2787	17.4656	17.624	17.4496	17.714	17.5127
Alpha-Eleostearic acid	500.178	20.1704	20.2989	20.3538	20.3538	20.2302	21.7512	21.8538	21.8423	21.7265	21.8034	21.1395	20.9951	20.9882	21.0156	21.1332	20.2066	20.3962	20.2419	20.1581	20.2419	20.2066	20.2877	20.2184	20.3211	20.2066	19.6347	19.786	19.7553	19.68	19.647
2-Amino-1,3,4-octadecanetriol	492.963	16.5995	15.9859	15.9859	16.8113	16.3987	15.7018	15.959	15.9926	16.0319	16.1074	16.4672	14.9613	15.1752	14.9926	15.0232	14.5204	14.3853	15.5356	14.9106	13.5627	13.5018	14.0102	14.3304	13.6883	13.8337	14.0276	13.8533	14.0617	13.9658	13.9837
Oleoyl-L-alpha-lysophosphatidic acid	488.964	14.392	13.8727	14.8337	14.2949	14.1674	14.0189	13.8435	13.8727	13.8435	14.3718	15.0532	14.6718	15.3581	14.4318	14.9106	15.9837	16.0971	16.0532	16.2967	15.9362	16.0232	15.6718	15.9362	16.4021	16.2156	14.9748	15.183	15.3373	15.412	15.5387
Cyclo(leucylprolyl)	486.14	14.1437	14.2949	13.7731	13.4767	13.7099	14.7153	14.9658	15.0532	14.887	14.9522	13.4893	13.3443	12.8037	13.0137	13.3021	14.4704	14.7834	14.7524	14.5567	14.2061	13.3718	13.5265	13.1405	13.8435	13.4383	15.7757	15.8965	15.8989	15.9658	15.6523
Tyramine	483.48	14.9106	16.1397	15.6268	15.4736	15.997	15.0826	15.997	15.5326	15.0319	15.5981	13.2877	13.7313	13.1244	14.3373	13.5507	13.0206	13.863	14.0951	14.0102	13.6883	12.8975	13.6439	13.1016	13.3987	13.4893	12.8494	13.0067	13.1643	13.3718	14.0532
Uridine monophosphate (UMP)	482.459	18.0479	17.9431	17.9826	18.3101	18.0047	17.1457	16.9658	17.3495	17.2787	17.1257	15.4704	16.7073	16.3937	16.8238	16.7471	15.4087	17.0743	16.7073	16.601	16.8727	16.4219	15.9992	16.2823	16.5065	16.5746	15.4054	15.691	15.5477	15.3547	15.7628
Pantetheine4'-phosphate	478.996	13.3853	13.0119	13.3718	14.0102	13.7524	15.8751	16.3269	16.5034	16.7471	16.412	15.9904	16.7987	16.4054	16.8238	16.8606	16.1337	16.7602	17.1457	16.9316	16.624	14.2732	14.3092	14.6439	13.9476	14.9748	15.4956	15.7602	16.0189	16.4383	16.2913
Glycine	476.085	28.2535	28.3662	28.0864	28.3153	28.3787	28.1652	28.066	27.9977	28.1795	27.9814	26.7771	26.8385	26.9428	26.7389	27.1015	26.7895	26.4692	26.673	26.3712	26.2335	26.2732	26.4089	26.4785	26.1946	26.1391	26.0935	26.0464	26.3645	26.341	26.7389
Azelaic acid	474.425	18.2787	18.3794	18.3962	18.2832	18.1655	17.6523	17.9545	18.0156	18.3101	18.0532	17.1155	17.1946	17.5805	17.2604	17.3233	18.2419	18.8576	20.0951	19.2137	17.2967	17.5657	17.6168	17.4496	17.2877	17.6593	16.5642	16.4528	16.3853	16.4496	16.1811
2-Methylglyceric acid	466.312	18.3012	18.7602	17.805	18.392	18.1946	19.3667	19.0453	18.5318	18.9054	18.2279	18.2279	18.5878	18.2042	17.7537	18.2832	17.7923	17.4576	17.3145	16.92	16.9545	17.1155	16.8965	16.624	16.4704	16.4736	18.2419	17.9601	18.5318	18.0211	18.4815
Alanyltyrosine	464.607	18.3277	18.9459	18.8697	19.2042	19.0292	19.7307	19.8408	19.6662	19.9882	19.7876	18.9658	19.0292	18.9516	19.0129	19.0479	18.8846	18.8484	18.6311	18.8238	18.7731	18.5127	18.4087	17.4736	18.4736	18.4736	17.6523	17.5356	17.6096	17.5805	17.5805
Guanosine	452.291	26.4138	26.2207	26.0464	26.0359	25.9912	26.3778	26.3695	26.1719	26.2589	26.4598	26.5754	26.275	26.3511	26.2714	26.3612	25.7619	25.7208	25.7182	25.6012	25.4676	25.5195	25.4041	25.4488	25.5983	25.433	23.7182	24.2317	23.4298	23.3101	23.9495
L-Glutathione (reduced)	448.413	23.7796	23.6757	23.9672	24.2891	24.0772	24.0772	24.3307	24.3511	24.6153	24.7695	22.9098	23.2961	23.0838	23.3511	23.3376	22.9406	23.2679	23.5638	23.6431	23.6096	21.3699	20.9882	21.5961	21.0493	21.6453	22.8746	23.2679	23.4298	23.3376	23.5522
Gly-Tyr	442.834	24.6971	24.8385	24.824	25.1833	24.9539	25.4707	25.7103	25.6264	25.8694	25.9111	24.2891	24.4738	24.3376	24.4488	24.4362	24.2535	24.3778	24.2679	24.2317	24.2096	24.2961	24.2096	23.848	24.2317	24.239	23.3101	23.48	23.5983	23.6649	23.4551
Carnosine	442.569	27.4707	27.5389	27.7129	27.7645	27.5898	28.604	28.7357	28.6697	28.7325	28.7613	26.1908	27.6663	27.8741	27.5969	27.611	24.7286	26.5075	24.632	25.2207	26.3101	24.8191	26.632	24.8044	26.3545	26.3926	24.7995	25.9473	24.7594	25.918	25.7129
Fumaric acid	440.212	25.239	25.3712	24.8093	25.1488	25.0691	25.9562	25.9157	25.7517	25.8093	25.4105	24.5105	24.7695	25.1908	24.989	24.7796	24.6971	24.6209	24.2607	24.4488	24.1719	23.9316	24.3031	24.3844	24.0609	23.8385	23.0054	22.9298	23.417	23.1658	23.5285
L-Leucine	437.762	30.5203	30.4919	30.5933	30.7129	30.4823	30.9188	31.2759	31.2535	31.2193	31.2703	30.099	30.393	30.393	30.3828	30.341	29.7988	29.995	30.0737	29.8279	29.8653	29.7437	29.995	29.846	29.7533	29.837	28.9484	29.3869	29.1115	29.3951	29.2262
L-Phenylalanine	436.106	25.0691	25.1908	25.2096	25.4551	25.0317	25.7312	26.0874	26.1095	26.0148	26.1055	24.5522	24.7594	24.895	24.7543	24.7441	24.4614	24.7594	24.6918	24.4425	24.3578	24.5404	24.8191	24.4738	24.4862	24.3975	23.7796	24.1795	23.9225	24.2607	23.9495
2,4-diaminobutyric acid	435.175	21.5309	21.7471	21.2066	21.4118	21.5731	21.4576	21.2593	14.7046	21.2066	20.9316	21.1079	21.1704	21.1642	20.9459	21.2361	20.8191	20.6886	20.5451	20.3321	20.265	20.1825	20.3857	20.3645	19.7356	19.724	19.7955	19.5526	19.9068	19.7056	19.9601
2-Amino-3-methoxybenzoic acid	434.382	27.217	27.1507	27.2077	27.17	27.0609	26.5165	26.7389	26.7129	26.4057	26.3861	26.1642	26.0317	25.654	26.0894	26.1055	25.9998	26.2077	26.0148	25.9716	25.6676	25.6181	25.2133	25.4862	25.5492	25.3645	25.1015	25.3477	24.8142	25.673	25.2426
Choline	431.361	14.7366	14.5265	14.997	14.9703	14.412	15.5597	15.1196	14.9658	15.3581	15.6634	16.0036	16.3251	16.582	16.2326	16.734	15.9703	16.0951	16.579	16.6662	15.846	16.1457	16.1135	15.9613	16.3127	15.6297	16.3786	16.0145	16.387	16.0145	16.5702
Homogentisic acid	428.953	24.0609	23.5404	23.5983	22.937	22.9601	25.7363	25.7745	25.8599	25.7234	25.7645	22.0459	22.3831	23.1916	20.5356	21.3857	25.6209	26.0254	26.3528	25.6998	25.6012	25.391	25.848	25.1642	24.5285	24.8623	23.8764	24.0609	23.4923	22.9742	22.9742
Cysteine	426.59	22.1916	22.8895	22.1457	21.9098	22.3211	23.5754	23.8858	23.8191	23.5404	23.8385	23.019	24.1015	23.5165	23.141	23.6865	24.5404	24.632	23.9316	23.6757	24.0609	24.5638	24.4105	24.6264	23.4551	24.1565	25.1095	23.895	25.0275	24.7492	24.5696
N-Acetylmannosamine	425.706	22.0224	22.5285	23.1825	22.2155	23.2021	24.5285	24.7182	24.6595	24.5983	24.558	25.5135	25.5404	25.5433	25.4488	25.4707	24.6595	24.8858	24.8044	24.6811	24.7543	24.5045	24.5696	24.558	24.2535	24.3511	23.6431	23.7077	23.6971	23.7895	23.6757
Inositol-4-monophosphate	422.491	17.3667	16.8113	17.2042	17.0319	16.786	17.2232	17.5805	17.5204	17.4576	17.7667	16.1437	16.0189	16.0276	15.846	16.0211	15.5981	15.4054	15.4862	15.4608	15.8435	15.3853	14.9926	15.0575	15.1635	15.8062	17.1357	17.7005	16.7073	17.0426	16.7602
N6,N6,N6-Trimethyl-L-lysine	418.879	24.7129	24.6703	24.5045	24.8336	24.5983	24.8623	24.5754	25.065	25.5433	25.0935	25.5105	26.0212	25.8647	26.1312	26.1075	26.17	26.48	26.3679	26.4551	26.2133	26.4723	25.7182	26.4024	26.0833	26.2874	26.1115	26.1946	26.189	26.346	26.143
Tryptophan	412.526	30.4823	30.3724	30.5296	30.5844	30.3515	30.5664	30.8901	30.8309	30.7849	30.846	29.94	30.1361	30.2077	30.099	30.1239	29.6372	29.8035	29.8579	29.668	29.6663	29.4746	29.5033	29.4194	29.4354	29.5664	28.9316	29.196	28.9677	29.1628	28.9787
Ala-Val	409.214	30.8608	30.7533	30.9117	31.0017	30.5754	31.3142	31.6329	31.5389	31.6022	31.5296	30.4234	30.5109	30.4727	30.6285	30.3724	30.2308	30.3828	30.2077	29.9677	29.8203	30.2308	30.2647	30.0084	29.9539	29.9259	29.5682	29.5808	29.6458	29.6798	29.4012
Trehalose-6-phosphate	406.165	23.391	23.3239	23.2535	23.3645	23.391	23.895	23.8576	23.9316	23.9225	23.7492	23.9847	23.8288	24.0275	23.7796	23.9495	23.0756	23.0376	22.9495	23.074	22.9189	23.5045	23.48	23.5522	23.6649	23.5638	21.4626	21.7995	21.5498	21.9024	21.6497
L-Pyroglutamic acid	392.093	21.7915	22.0493	21.928	21.4972	22.1238	20.7389	20.9742	20.9388	20.5165	20.7955	20.1079	20.7389	20.68	21.4375	20.5261	19.8606	19.5676	19.4516	19.8651	19.4913	19.6937	19.4004	19.6168	19.8469	19.8346	19.8591	19.9601	19.7273	19.8377	19.8891
Cystathionine	390.95	20.2066	20.2989	20.1332	20.3645	20.2419	19.83	20.1332	20.0426	19.9316	19.0664	18.5842	18.4854	18.6731	18.8906	18.6276	19.197	20.002	19.734	19.5638	19.606	19.615	19.503	19.4273	19.4556	19.6006	18.7892	18.9171	17.8484	18.9488	18.6311
Glucose	373.923	31.7006	31.7533	31.7849	31.8309	31.6586	31.7533	31.8829	31.8385	31.8271	31.8196	31.2535	31.341	31.3303	31.2591	31.2193	30.9117	31.0737	30.8829	30.9882	30.7613	30.8608	30.8901	30.8534	30.9188	30.7292	30.3088	30.3828	30.5014	30.3724	30.3828
Eicosapentaenoic acid	372.813	16.5341	16.494	16.6523	16.8238	16.7602	18.1752	18.3752	18.4334	18.2372	18.2419	18.0047	17.3145	17.5356	17.8113	17.8113	17.4087	17.5432	17.3667	17.3495	17.2604	17.9258	17.7406	17.8484	17.9024	17.528	16.4925	16.7731	16.6053	16.6382	16.4528
Asparagine	371.88	31.0084	31.0084	31.0864	31.1422	30.995	30.5573	30.8309	30.7613	30.8385	30.8829	30.3724	30.3196	30.3724	30.4433	30.4134	29.6697	29.8564	29.7771	29.7129	29.6781	29.4862	29.4957	29.3848	29.4314	29.4842	30.196	30.1604	30.1483	30.3303	30.1239
11,12-Epoxy-(5Z,8Z,11Z)-icosatrienoic acid	364.576	17.624	17.7796	18.0847	18.1898	18.0899	19.2255	19.5915	19.6168	19.5805	19.5933	18.9882	18.5731	18.5988	19.0821	19.1155	18.5127	18.805	18.5988	18.6096	18.5394	19.0479	18.92	18.8361	19.1104	18.7923	17.2787	17.786	17.624	17.9024	17.6937
L-Citrulline	359.548	23.5522	23.848	23.2679	23.3101	23.4676	23.976	23.7594	23.5754	23.632	23.48	22.3156	22.4425	22.44	22.3017	22.5333	22.2361	21.9495	22.2155	21.6929	21.6141	21.8346	21.7995	21.8802	21.3805	21.3857	21.3962	21.1395	21.6628	21.7098	21.8385
(15Z)-9,12,13-Trihydroxy-15-octadecenoic acid	357.1	14.2288	14.2732	14.5864	14.7153	14.6828	14.5507	15.1908	15.3304	15.4576	15.6439	13.8533	13.9567	14.7731	14.887	14.8823	13.8138	14.6211	15.9882	15.3373	13.6325	13.2512	12.9218	12.8553	13.2152	13.6883	12.0084	12.3359	11.8842	12.9676	12.2877
3-Hydroxyproline	355.363	26.3066	26.329	26.6865	26.5898	26.8858	26.7129	27.0401	27.2077	27.0914	27.0711	26.6181	26.7389	26.7129	26.7645	26.9088	25.1565	25.2499	24.9672	24.9803	24.8191	24.989	25.0359	24.6703	24.7645	24.7594	24.7129	24.824	24.4676	24.6209	24.4425
11(Z),14(Z)-Eicosadienoic acid	355.325	15.1196	15.4831	15.5477	15.4672	15.4893	15.5326	15.959	16.0847	15.9926	16.2156	15.2475	15.1517	14.8918	15.3887	15.5951	14.2137	14.3021	14.2363	14.5204	14.6883	14.5627	14.8088	14.6937	15.2175	15.3615	14.1196	14.3786	14.1908	14.3163	14.3443
Fructose	346.384	21.2707	21.4825	21.1704	21.1015	21.5685	21.1143	21.4972	20.9243	20.002	21.3321	20.0156	20.5915	20.4775	19.9459	21.0625	19.8591	19.6505	20.1946	20.4273	20.5356	20.7307	20.3962	19.3034	20.265	20.0691	21.7594	21.7715	21.895	21.8839	22.0426
Adenine	342.766	25.9955	26.1546	25.7338	25.8167	25.945	25.8623	25.8528	25.6784	25.7182	25.5812	27.2077	27.141	27.0296	26.9316	27.1507	27.463	27.4154	27.341	27.0711	27.019	27.0084	27.2077	27.2535	26.7129	26.6998	26.3943	26.3187	26.726	26.3975	26.7645
Citramalic acid	338.325	26.9869	24.3645	26.3376	24.1871	26.0955	25.9869	25.9066	26.965	23.7492	26.7645	26.0443	27.3066	27.7389	26.9203	26.673	27.7325	27.189	26.5463	27.6595	25.7695	26.4362	27.524	26.7645	27.3828	26.9088	25.1371	24.8336	22.7895	24.7492	23.6209
Noradrenaline	336.769	21.2535	21.2877	20.9459	20.8727	20.8727	21.9061	21.6364	21.5356	21.4576	21.632	20.5356	20.5165	20.5545	20.3321	20.4775	20.7056	20.2419	20.6006	20.1457	20.0559	20.343	20.1206	19.8222	19.9171	19.7471	19.8346	19.729	20.0156	20.417	20.7056
Citraconic acid	335.286	26.9203	26.5898	26.9869	26.9316	27.1214	25.4892	25.8044	25.867	26.3342	25.8019	23.867	24.4362	24.0105	24.3844	24.5983	24.2891	24.976	24.1946	24.9271	24.7389	23.9847	24.3975	23.8093	23.2961	23.8576	25.4266	25.6486	25.5105	25.673	25.4953
Adenosine diphosphate (ADP)	331.986	18.714	18.4854	19.8113	19.8667	18.9658	16.786	16.6523	17.5731	16.8484	16.7207	16.1556	16.0785	17.2326	16.1357	16.1965	16.5417	16.7207	17.0951	16.8846	16.734	15.7099	16.68	16.2949	15.5893	16.5981	15.5049	15.2805	14.6991	15.6718	14.7576
Fructose-1-phosphate	323.971	18.6766	18.6417	18.9459	19.3365	18.9798	17.9488	17.9658	17.977	17.3145	18.8484	17.4496	18.1002	18.1357	18.0426	18.0319	16.786	17.1257	17.8361	17.4004	16.8846	16.9083	14.6325	16.5387	14.5387	16.2269	16.977	16.786	16.5341	16.8484	16.7987
Lactitol	321.305	19.4676	19.392	18.3581	18.8454	19.5878	20.6186	20.7634	20.6364	20.6276	20.5915	22.019	21.9637	22.0723	21.9882	22.0292	21.5451	21.4015	21.5309	21.3484	21.2593	21.0691	21.1332	21.0426	20.9672	21.0156	19.7683	20.1457	19.7844	20.1332	20.1206
Targinine	319.2	27.2262	27.17	27.189	27.2979	27.2803	27.341	27.4785	27.5014	27.5682	27.4785	28.1361	28.2308	28.189	28.2803	28.258	28.341	28.4707	28.4073	28.3662	28.3023	28.391	28.3282	28.3578	28.3367	28.2847	28.391	28.4785	28.3578	28.4976	28.3704
Oleic acid	315.035	29.4433	29.5536	29.4649	29.3109	29.1507	29.0322	29.1747	29.0479	28.8264	28.9977	28.249	28.1015	27.8264	27.9259	27.9869	28.4668	28.4668	28.2979	28.2123	28.3109	28.5463	28.55	28.4354	28.4976	28.3787	28.1065	28.2847	28.0609	28.0453	27.8858
N-Methylalanine	314.916	26.2372	26.2372	26.0505	26.3861	26.1833	25.0148	25.2996	25.1135	24.9977	25.1527	23.1961	24.1015	24.019	22.7389	22.9006	24.0772	24.5345	24.317	23.48	24.1642	24.1565	22.8839	24.1565	24.1642	24.2096	24.6757	24.7695	24.8288	24.8191	24.6865
Riboflavin	313.695	23.5165	23.4923	23.48	23.654	23.3645	23.7895	23.976	23.867	23.9225	24.002	22.5213	22.6387	22.7161	22.4041	22.5093	22.6409	22.7056	22.8461	22.4501	22.5846	22.4947	22.3376	22.4324	22.4551	22.4221	22.7035	22.953	22.8191	22.8288	22.8557
L-(+)-Tartaric acid	302.788	23.2679	23.3239	23.4041	23.4041	23.2258	24.1095	24.2607	24.3307	24.1174	24.2021	23.5983	23.5045	23.5754	23.5045	23.4923	22.9601	23.1488	23.0002	22.9225	22.9152	22.7876	22.6409	22.6497	22.6096	22.5451	23.895	24.002	23.8858	23.9316	23.8385
Leucylproline	291.884	21.5638	21.5777	21.8802	21.7876	21.3645	21.7182	22.9243	23.1503	22.3101	22.4996	20.7223	20.895	20.9024	20.85	20.895	20.3101	20.6971	20.6971	20.4375	20.5451	20.4972	20.6186	20.3538	19.9316	20.8727	19.5805	20.1079	19.9316	20.4067	20.0951
Adenosine 3'5'-cyclic monophosphate	284.269	15.1397	15.2949	14.9658	15.7706	15.5111	14.8037	15.3887	15.4799	15.6551	15.1517	14.0951	14.0951	14.3373	14.2949	14.7471	14.5507	14.6937	15.0868	14.6439	13.8435	14.887	15.3684	15.4219	15.3684	15.2061	16.0596	15.8557	15.9815	16.1984	15.9339
L-Tyrosine	281.472	28.8415	28.8294	28.8504	29.0137	28.7096	28.3109	28.632	28.7096	28.5352	28.6595	28.4551	28.6964	28.726	28.6424	28.6181	27.7064	27.9203	27.8916	27.6931	27.726	27.7708	27.7833	27.7129	27.632	27.6595	27.509	27.726	27.4938	27.6389	27.4862
Gly-Ile	277.377	27.9031	27.7771	27.6798	27.5165	27.341	28.3239	28.611	28.3704	28.1361	28.0813	27.6389	28.0243	28.003	27.9259	27.9146	27.5898	27.4785	27.6251	27.3066	27.4707	27.7064	27.5609	27.4785	27.673	27.9088	26.5565	26.6998	26.5682	26.6181	26.673
trans-Cinnamic acid	276.839	16.1236	16.0575	16.1417	16.3408	15.9992	16.8113	17.2042	17.2042	17.0319	16.9658	15.8799	15.9293	16.034	15.9658	15.9293	15.734	16.1033	15.9036	15.8894	15.5507	15.6855	15.9106	15.8942	15.7073	15.7498	15.3056	15.3443	15.3684	15.7233	15.3269
Xylitol	275.527	24.2096	24.2607	24.4041	24.3578	24.2535	24.4551	24.4738	24.5165	24.3778	24.2821	25.2207	25.217	25.0484	25.1174	25.1332	25.2714	25.3031	25.452	25.3511	25.3645	25.5105	25.5433	25.4953	25.5345	25.7024	25.1795	25.3135	25.3376	25.2714	25.2961
2-(Acetylamino)hexanoic acid	269.009	15.718	15.601	15.5657	15.755	15.5834	16.185	16.3752	16.5003	16.3971	16.2567	15.3752	15.3684	15.3233	15.4672	15.5507	15.049	15.4544	15.4415	15.3786	15.2023	15.508	15.4862	15.5142	15.4736	15.5417	14.0276	14.0189	13.2198	13.9926	13.8138
D-ribose 5-phosphate	266.566	18.6558	18.6971	18.977	19.2512	18.8331	18.8757	19.1531	19.2809	19.1407	19.2581	19.4775	19.5768	19.6628	19.6645	19.7406	18.6662	19.0612	18.8576	18.9112	18.7923	18.6347	18.6382	18.5731	18.6132	18.8515	17.6024	17.786	17.5805	17.0532	17.7273
Myristic acid	266.491	21.1519	21.4626	21.4273	21.5069	21.3376	21.0886	21.502	21.4221	21.3376	21.3962	20.4874	20.5638	20.714	20.6886	20.6364	20.0426	20.0292	20.1704	19.7844	19.8802	20.2989	20.1332	20.1206	20.1825	20.2877	20.1079	20.265	20.2535	20.3211	20.343
Inositol	264.498	27.6663	27.604	27.726	27.8504	27.6389	27.6389	27.9146	27.9146	27.8019	27.7958	27.4938	27.4073	27.4473	27.4394	27.5682	26.7517	26.673	26.5898	26.3959	26.0975	26.5374	26.5898	26.4831	26.6458	26.0995	25.9293	25.792	25.8788	26.3342	25.4676
Threonine	262.4	30.1115	30.0217	30.1483	30.362	30.1483	30.9677	31.2535	31.2479	31.3142	30.8829	29.6303	29.7227	29.7818	29.7292	29.8019	29.509	29.7645	29.6441	29.6595	29.5826	29.2869	29.258	29.0003	29.3494	29.3536	29.2736	30.0349	29.4294	29.5147	29.3494
Linoleic acid	262.085	20.9024	21.1079	21.0951	21.1946	21.0426	22.1111	22.4451	22.4324	22.1704	22.4324	22.155	21.743	21.8614	22.1612	22.0625	21.0821	21.0951	21.3101	20.9672	21.0951	21.2933	21.0951	21.0559	21.4221	21.4476	20.9388	21.2184	21.0756	21.1886	21.1332
4-Hydroxymandelonitrile	259.218	25.632	25.6181	25.6595	25.6865	25.5955	24.9977	25.2571	25.2785	24.9847	25.0609	24.918	24.5404	24.317	24.9088	25.019	24.6649	24.6209	24.7024	24.6649	24.3778	24.2317	24.0609	23.9134	24.3511	24.1015	23.8576	24.0854	23.3376	24.48	23.7492
N-Methylvaline	257.162	32.4334	32.4083	32.4384	32.5754	32.3646	32.6944	32.8515	32.8196	32.8478	32.8719	32.0017	32.0864	32.099	32.0381	32.0673	31.7006	31.94	31.7965	31.6839	31.5481	31.9882	32.196	31.9117	31.8792	31.9153	31.1115	31.4032	31.099	31.4823	31.1239
Trehalose	253.318	19.9882	19.7796	19.8876	19.9229	19.8066	20.5356	20.6364	20.5165	20.4273	20.4972	20.895	20.8651	20.8423	20.9316	20.9812	21.0691	21.0821	21.1519	21.0691	21.0559	21.2184	21.0088	21.0359	20.9672	21.1206	20.7056	20.6886	20.5261	20.6096	20.5069
Glycerol-3-phosphate	246.868	29.1361	29.2376	29.0137	29.0965	29.2353	28.5278	28.3536	28.3869	28.509	28.3494	28.5898	28.5128	28.611	28.4113	28.5826	28.17	28.0505	27.9539	27.7833	27.8203	27.8203	27.9923	28.0711	27.4862	27.611	27.5898	27.4314	27.632	27.391	27.391
O-Succinylhomoserine	246.125	27.8623	27.8564	27.9031	28.0243	25.6703	26.1681	26.2625	26.1795	26.2961	26.2481	25.5551	25.5014	25.4892	25.7543	25.7594	26.6181	26.6181	26.5595	26.7771	26.8264	26.7129	26.5404	26.391	26.7771	26.9088	25.275	24.8997	25.3307	25.5225	25.4041
UTP	243.983	11.3106	10.9366	11.6751	11.2586	11.3608	11.1861	11.1984	11.5362	11.5362	11.4717	11.0362	11.043	11.1548	11.1163	11.2348	13.0851	13.3443	13.6325	11.9549	11.9031	12.9567	14.4054	14.8582	13.5746	13.4893	13.5387	14.9522	14.0102	14.7987	14.2659
1-kestose	242.89	22.2564	22.3017	22.4247	22.6006	22.7492	22.2764	22.2477	22.6096	22.7614	22.695	23.2679	23.0625	23.417	23.1642	23.5638	23.5045	23.4551	23.5638	23.6865	23.9043	23.5983	23.654	23.848	23.6757	23.8288	23.1658	23.1688	23.1379	23.2821	23.2506
Maleic acid	238.499	28.9622	28.8534	29.4571	29.1288	29.109	29.1795	29.3088	29.393	29.341	29.3599	28.8974	29.114	29.2147	28.49	28.579	28.5933	28.8142	28.7895	28.8653	28.7292	28.189	28.0965	28.2308	28.3196	28.1795	27.8203	27.8858	27.8324	27.9088	27.8019
4-Coumaric acid	238.193	20.8191	20.3962	20.8727	20.9672	19.5823	20.0691	20.0156	20.4676	20.714	19.9127	21.3752	21.4221	21.4273	21.4726	21.4118	20.5731	20.714	20.5915	20.4375	20.4273	20.4576	20.5451	20.1946	20.2989	20.2989	19.9316	19.9882	19.8361	20.0691	19.8066
Pantothenic acid	235.29	18.8207	18.8965	18.9142	18.8817	18.9229	18.1994	18.185	18.1104	18.1257	18.2466	19.1704	19.1507	19.1922	19.2279	19.1332	18.9992	19.1181	18.9054	19.0638	19.2161	18.9459	18.8081	18.6835	18.6937	18.6766	17.8906	18.0047	17.5582	17.6382	17.6311
3-Hydroxy-3-methylglutaric acid	234.605	28.0296	28.0762	28.1984	28.2803	28.1312	28.341	28.5165	28.6458	28.2803	28.3367	28.4823	28.6865	28.7581	28.7927	28.8081	27.5969	28.003	27.7581	27.7064	26.965	27.7517	27.6389	27.7325	27.7708	27.9484	26.9539	27.2445	27.0401	27.189	26.7517
Uracil	234.092	32.7829	32.6985	32.8176	32.5343	32.375	32.9746	33.1559	33.1438	32.8176	32.8023	32.9435	32.9277	32.9643	32.635	32.5732	32.2619	32.393	32.3956	31.8422	31.7692	32.13	32.1901	32.0544	31.5889	31.4727	31.3515	31.4532	31.0349	30.8534	30.6022
Glyceraldehyde	232.059	31.6458	31.7129	31.7965	31.8755	31.7573	31.5664	31.9045	31.8347	31.7927	31.8422	31.1483	31.325	31.3196	31.362	31.362	30.8974	31.1177	31.0283	30.995	30.8682	30.7613	30.7771	30.7849	30.9045	30.7047	29.6915	30.3088	30.341	29.0634	30.341
S-Adenosylmethionine	230.592	20.7876	20.9388	21.0691	21.0292	20.9024	20.8346	20.8346	20.8651	20.7307	20.9459	21.7995	21.8034	21.8191	22.0122	21.8913	21.953	21.7955	21.8269	21.895	21.8802	21.8614	21.7995	21.7348	21.8727	21.823	20.9812	21.002	20.9951	21.2764	21.002
D-Ribose-1-phosphate	227.247	17.5731	17.6311	17.7273	17.7537	17.4893	17.734	17.805	17.7471	17.7602	17.8423	18.0585	17.9937	18.0211	17.9992	17.9024	17.392	17.4334	17.4656	17.4415	17.3408	17.3581	17.3752	17.2232	17.2232	17.3145	16.4366	16.6382	16.3786	16.5966	16.4512
Methionine	224.365	24.4041	24.867	24.1174	23.867	23.9406	25.4041	25.4425	25.3342	25.1371	25.3066	24.3376	24.8433	24.5522	24.1565	24.7234	24.867	24.5463	24.5225	24.1488	24.1871	24.5345	24.4676	24.4425	23.5285	23.895	24.0691	23.2961	23.4923	24.0854	23.5285
Succinic acid	220.899	23.1596	23.3376	23.4676	23.4923	23.1301	24.3101	24.1795	24.4298	24.0854	24.002	24.3645	24.558	24.4923	24.5522	23.9847	24.7846	24.9271	24.9406	24.9406	24.3578	23.4425	24.2821	24.2244	23.895	23.9495	24.0772	24.2821	23.9672	24.0105	23.7695
Methioninesulfoxide	219.211	25.2571	25.2961	25.6784	25.2353	25.1795	25.705	26.0359	26.0401	26.0105	26.2445	24.6649	24.4676	24.7745	25.0359	25.0935	24.4923	25.1488	25.2463	24.989	24.8191	24.2021	25.002	24.7745	24.8385	25.2244	24.5045	24.5869	25.2021	24.6865	24.7441
Arachidonic acid	216.055	21.6231	21.7634	21.7675	21.8839	21.68	22.7348	23.0493	22.9243	22.8727	23.0173	22.0951	22.0951	21.8839	22.0821	22.1457	21.9024	22.0559	21.8913	22.0592	21.9777	22.3645	22.4451	22.2332	22.5213	22.4996	21.3752	21.4825	21.3266	21.5731	21.3857
Thiamine	215.636	21.7307	21.6276	21.8423	21.8113	21.8727	22.5213	22.6562	22.6453	22.7955	22.8054	22.8839	22.8764	22.7995	23.087	22.9495	22.8538	22.8764	22.8708	22.7013	23.0309	22.7574	22.7327	22.5638	22.7594	22.9388	22.9742	22.7955	22.6628	23.1901	22.9298
Diaminopimelic acid	213.158	22.4375	21.9601	22.3511	21.7013	21.7836	21.714	21.6584	21.7471	21.6141	20.4273	20.5915	20.9601	20.7553	20.8269	20.7223	20.3752	20.5165	20.3962	20.2989	20.3211	20.6628	20.5731	20.5069	20.4676	20.4874	19.9171	20.1946	19.9316	20.0559	19.9156
Spermidine	212.002	20.1079	20.1332	20.1079	19.7939	19.5951	19.714	20.1332	19.6869	19.8408	19.8591	18.9714	19.3233	18.5988	18.5394	19.185	18.9798	18.8454	19.1181	18.4656	18.4252	19.0399	18.8727	18.5768	18.0265	17.9826	19.0951	18.0426	18.5432	17.4815	17.977
Allantoin	211.435	29.4727	29.4174	29.2957	28.8653	28.8682	28.8858	28.9923	29.104	28.632	28.2803	28.2353	28.2759	28.1312	26.5029	27.3324	28.4234	28.019	28.0296	27.8799	26.0169	28.1164	27.9923	27.4551	26.6998	26.8974	26.6458	24.7995	27.3662	25.0813	24.824
Pyridoxine	210.16	25.7594	25.767	25.7466	25.8858	25.7594	25.8215	25.9933	25.945	25.9316	25.9716	25.3679	25.391	25.3239	25.3778	25.3877	25.3712	25.5609	25.4707	25.3511	25.2317	25.1253	25.002	24.7182	24.976	24.945	26.3811	26.4138	26.2114	26.5754	26.4815
alpha-Lactose	207.588	23.2184	23.2535	22.4324	22.502	23.019	23.2244	24.1946	23.8576	23.6649	22.5356	24.6703	24.5983	24.6153	24.6918	24.5983	24.8717	24.8433	24.824	24.7895	24.7594	24.9271	24.8093	24.8576	24.7796	24.8142	24.7745	24.7796	24.7594	24.7645	24.6865
4-Methyl-5-thiazoleethanol	205.443	25.3545	25.3066	25.4738	25.5014	25.4769	26.0609	26.2207	26.1965	26.1719	26.2426	26.3376	26.3153	26.3695	26.4692	26.5285	26.3427	26.5653	26.3762	26.3645	26.4008	26.3861	26.4041	26.2553	26.3239	26.3324	26.5624	26.5682	26.4723	26.632	26.5898
N-Acetylornithine	205.063	23.2273	23.1612	23.2506	23.417	23.2679	23.0037	23.2244	23.2288	23.3376	23.391	22.4923	22.5451	22.6141	22.7265	22.7715	22.2244	22.4221	22.3184	22.4996	22.417	22.1765	22.0756	21.8689	22.2792	22.3321	22.5117	22.5475	21.502	22.6119	22.6736
Hydroxyproline	201.096	28.509	28.3578	28.5389	28.6285	28.5278	28.459	28.6216	28.611	28.7292	28.6831	28.8294	28.8593	28.9977	28.965	29.003	28.0609	28.2262	28.3196	28.5609	28.019	27.9372	27.9316	27.4073	27.8623	28.0813	27.5389	27.3153	27.4862	27.5969	27.8081
3-Phosphoglyceric acid	196.818	17.9545	18.0638	18.1752	18.1155	18.0156	16.8361	16.9545	17.0951	16.6382	17.0532	18.3624	18.5088	18.1946	18.3145	18.2787	17.8727	18.0951	18.0743	17.8846	18.1104	18.6311	18.4004	18.3101	18.2832	18.392	17.6731	18.0319	17.7667	18.0743	17.786
DL-beta-Leucine	194.266	23.0292	23.0609	23.214	23.0275	22.9152	23.5045	23.9134	23.7695	23.7895	23.8576	22.4898	22.5846	23.1348	22.2332	22.4425	22.5356	22.4726	22.3294	22.2877	22.3239	22.4947	22.7512	21.9882	22.1642	22.0359	21.7389	22.0393	21.7265	21.5823	21.0359
N-Acetyl-L-leucine	190.689	16.3373	15.9223	16.2769	16.1094	15.9499	16.4512	17.1357	16.9882	17.0532	17.2232	15.9658	16.2732	16.3819	16.3478	16.3443	15.7885	15.9992	15.9223	16.2023	16.0638	16.1155	15.8337	15.8188	15.9792	16.0426	13.7628	13.9476	13.8138	14.9613	13.8918
Urocanic acid	186.787	24.3511	24.7129	24.8764	24.4362	24.8142	24.1795	25.0772	25.0609	23.8576	24.7695	24.48	24.8528	24.6264	25.3545	25.0443	26.0772	25.4984	26.1623	25.7619	25.5135	26.5682	26.5195	26.2589	26.2114	26.5624	26.4008	25.654	26.2607	26.4815	26.1391
putrescine	182.869	24.8288	24.9361	24.5404	24.6649	24.8811	24.4614	24.3975	24.2096	24.3031	24.1795	24.8191	24.8717	24.8385	24.6431	24.9803	24.5522	24.3376	24.3101	24.0854	24.0105	23.5983	23.654	23.5983	23.2021	23.1143	23.6971	23.4041	23.7594	23.181	23.5285
L-(-)-Carnitine	182.812	22.0723	22.1825	22.3831	22.3403	22.2125	22.2736	22.6431	22.6051	22.5685	22.4247	22.4501	22.417	22.5869	22.6096	22.6164	21.68	20.8651	21.8113	21.7756	21.7553	21.5165	21.5213	21.5731	21.5404	21.5961	22.6475	22.632	22.6029	22.7614	22.6971
L-Serine	182.201	29.1459	29.1724	29.326	29.3515	29.2285	29.2445	29.5518	29.5052	29.5609	29.6424	28.8799	28.8916	29.0164	29.0217	29.0111	28.362	28.6146	28.5128	28.4073	28.3578	28.3109	28.362	28.203	28.3109	28.3367	28.4194	28.3951	28.2308	28.5165	28.3367
5'-S-Methyl-5'-thioadenosine	177.92	21.7056	21.7056	21.8461	21.9459	21.7955	21.0821	21.3045	21.417	21.3045	21.3699	22.019	22.155	22.2535	22.2006	22.239	22.4247	22.5069	22.6431	22.4298	22.5404	22.0983	21.9916	21.9707	22.002	22.1079	21.3592	21.6141	21.5545	21.7098	21.6364
14(Z)-Eicosenoic acid	176.598	15.5657	15.8679	15.8533	15.7757	15.968	15.7153	15.9083	16.1713	15.9476	16.4004	13.9926	14.6096	14.1033	14.7366	15.0014	15.2175	15.2949	15.2949	15.3786	15.5746	15.6211	15.6634	15.68	16.0868	15.8775	14.6937	15.2023	15.0743	15.0405	15.2659
Gly-Val	171.685	29.7341	29.5718	29.6093	29.7096	29.6303	29.8264	29.9539	29.8549	29.9117	29.8081	29.2331	29.3303	29.341	29.3869	29.4134	29.1532	29.2869	29.1288	29.3001	29.17	29.0634	27.7833	28.6181	29.027	29.0531	28.6146	28.8385	28.8711	28.7581	28.7739
Sucrose-6-phosphate	167.3	18.7731	19.0873	19.4046	19.575	19.7667	17.9882	17.7073	18.2787	18.2232	18.2466	17.3836	16.8846	16.7073	17.4576	17.1655	17.3145	17.734	17.5356	17.5432	17.2877	17.5507	17.7602	17.8238	17.5951	17.9937	17.7923	18.2326	18.265	17.8667	17.7923
L-Norleucine	164.958	24.4676	24.5638	24.7077	24.848	24.6096	24.6703	25.0317	25.0275	25.1642	24.5165	23.9672	24.1488	24.1015	24.3511	24.2244	23.7389	24.1488	23.9847	23.8288	23.9043	23.5165	24.2535	24.1488	24.1015	24.2821	23.2821	23.6209	23.2317	23.6865	23.4041
[truncated: 71 more rows]

## Sheet: ReadMe
Supplementary Table S2. Multivariate empirical Bayes analyses (MEBA) analysis for time-resolved metabolomics and proteomics datasets .
[truncated: 2 more rows]
