# Supplementary material for: Time-resolved multi-omics analysis reveals the role of nutrient stress-induced resource reallocation for TAG accumulation in oleaginous fungus Mortierella alpina
Source: Biotechnol Biofuels. 2020 Jul 1;13:116. doi: 10.1186/s13068-020-01757-1 (PMC7328260; doi:10.1186/s13068-020-01757-1)
Supplement: Supplementary file 5 — Additional file 5. Proteins distributed in four different organelles. [file 13068_2020_1757_MOESM5_ESM.xlsx]

## Sheet: Sheet1
Query_name	Preferred_name	KEGG KO	P.Value	Fold.change	Threshold	description	Seed ortholog	e-value	score	best tax lvl	GO terms	EC number	KEGG pathway	KEGG module	KEGG reaction	KEGG rclass	BRITE	KEGG TC	CAZy	BiGG reaction	annot lvl	matching OGs	Best OG	COG cat	description
MA-00153-20	HTS1	ko:K01892	0.025326	0.37718	DOWN	WHEP-TRS	78898.MVEG_09724T0	2.6e-281	974.2	Fungi incertae sedis	GO:0000166,GO:0002181,GO:0003674,GO:0003676,GO:0003723,GO:0003729,GO:0003824,GO:0004812,GO:0004821,GO:0005488,GO:0005524,GO:0005575,GO:0005622,GO:0005623,GO:0005737,GO:0005739,GO:0006082,GO:0006139,GO:0006399,GO:0006412,GO:0006418,GO:0006427,GO:0006518,GO:0006520,GO:0006725,GO:0006807,GO:0008144,GO:0008150,GO:0008152,GO:0009058,GO:0009059,GO:0009987,GO:0010467,GO:0016070,GO:0016874,GO:0016875,GO:…	6.1.1.21	ko00970,map00970	M00359,M00360	R03655	RC00055,RC00523	ko00000,ko00001,ko00002,ko01000,ko01007,ko03016				Fungi	1GT5X@112252,38DB2@33154,3NVF4@4751,COG0124@1,KOG1936@2759	NA|NA|NA	J	WHEP-TRS
MA-00067-149	CBP3	ko:K09458,ko:K17662	0.0018743	0.25478	DOWN	Ubiquinol-cytochrome C chaperone	78898.MVEG_09935T0	1.7e-105	389	Fungi incertae sedis	GO:0000313,GO:0003674,GO:0005488,GO:0005575,GO:0005622,GO:0005623,GO:0005737,GO:0005739,GO:0005740,GO:0005743,GO:0005759,GO:0005761,GO:0005840,GO:0006417,GO:0006996,GO:0007005,GO:0008150,GO:0009889,GO:0009891,GO:0009893,GO:0009987,GO:0010468,GO:0010556,GO:0010557,GO:0010604,GO:0010608,GO:0010628,GO:0016020,GO:0016021,GO:0016043,GO:0017004,GO:0017062,GO:0019222,GO:0019866,GO:0022607,GO:0031090,GO:…	2.3.1.179	ko00061,ko00780,ko01100,ko01212,map00061,map00780,map01100,map01212	M00083,M00572	R04355,R04726,R04952,R04957,R04960,R04963,R04968,R07762,R10115,R10119	RC00039,RC02728,RC02729,RC02888	ko00000,ko00001,ko00002,ko01000,ko01004,ko03029				Fungi	1GUK0@112252,38HKQ@33154,3P27E@4751,KOG2873@1,KOG2873@2759	NA|NA|NA	C	Ubiquinol-cytochrome C chaperone
MA-00153-47	GUS1	ko:K01885	0.0035039	0.20806	DOWN	tRNA synthetases class I (E and Q), anti-codon binding domain	78898.MVEG_09682T0	0	1363.2	Fungi incertae sedis	GO:0002181,GO:0003674,GO:0003676,GO:0003723,GO:0003729,GO:0003824,GO:0004812,GO:0004818,GO:0005488,GO:0005575,GO:0005622,GO:0005623,GO:0005737,GO:0005739,GO:0006082,GO:0006139,GO:0006399,GO:0006412,GO:0006418,GO:0006424,GO:0006518,GO:0006520,GO:0006725,GO:0006807,GO:0008150,GO:0008152,GO:0009058,GO:0009059,GO:0009987,GO:0010467,GO:0010494,GO:0016070,GO:0016874,GO:0016875,GO:0017102,GO:0019538,GO:…	6.1.1.17	ko00860,ko00970,ko01100,ko01110,ko01120,map00860,map00970,map01100,map01110,map01120	M00121,M00359,M00360	R05578	RC00055,RC00523	ko00000,ko00001,ko00002,ko01000,ko01007,ko02048,ko03016				Fungi	1GT6Y@112252,38B44@33154,3NUH3@4751,COG0008@1,KOG1147@2759	NA|NA|NA	J	tRNA synthetases class I (E and Q), anti-codon binding domain
MA-00297-382	FUN12	ko:K03243	0.045801	0.33266	DOWN	Translation Initiation Factor	78898.MVEG_07928T0	0	1114	Fungi incertae sedis	GO:0000166,GO:0000462,GO:0001732,GO:0001882,GO:0001883,GO:0002181,GO:0002183,GO:0003674,GO:0003676,GO:0003723,GO:0003743,GO:0003824,GO:0003924,GO:0005488,GO:0005515,GO:0005525,GO:0005575,GO:0005622,GO:0005623,GO:0005737,GO:0005739,GO:0005829,GO:0005840,GO:0006139,GO:0006364,GO:0006396,GO:0006412,GO:0006413,GO:0006417,GO:0006446,GO:0006518,GO:0006725,GO:0006807,GO:0006996,GO:0008135,GO:0008150,GO:…		ko03013,map03013				ko00000,ko00001,ko03012				Fungi	1GVJR@112252,38DE9@33154,3NX6J@4751,COG0532@1,KOG1144@2759	NA|NA|NA	J	Translation Initiation Factor
MA-00184-424	TIM8	ko:K17780	0.010581	0.21869	DOWN	Tim10/DDP family zinc finger	78898.MVEG_07244T0	2.2e-38	164.5	Fungi incertae sedis	GO:0003674,GO:0005215,GO:0005575,GO:0005622,GO:0005623,GO:0005737,GO:0005739,GO:0005740,GO:0005758,GO:0006605,GO:0006626,GO:0006810,GO:0006811,GO:0006812,GO:0006839,GO:0006886,GO:0006996,GO:0007005,GO:0007006,GO:0007007,GO:0008104,GO:0008150,GO:0008324,GO:0008565,GO:0009987,GO:0015031,GO:0015075,GO:0015318,GO:0015833,GO:0016020,GO:0016021,GO:0016043,GO:0017038,GO:0022857,GO:0022890,GO:0030001,GO:…						ko00000,ko02000,ko03029	3.A.8.1			Fungi	1GUGH@112252,3A8VF@33154,3P6QF@4751,KOG3489@1,KOG3489@2759	NA|NA|NA	U	Tim10/DDP family zinc finger
MA-00090-295	TUF1	ko:K02358	0.012591	0.44999	DOWN	This protein promotes the GTP-dependent binding of aminoacyl-tRNA to the A-site of ribosomes during protein biosynthesis	78898.MVEG_08124T0	2.3e-238	831.2	Fungi incertae sedis	GO:0000049,GO:0000166,GO:0001882,GO:0001883,GO:0003674,GO:0003676,GO:0003723,GO:0003746,GO:0003824,GO:0003924,GO:0005488,GO:0005525,GO:0005575,GO:0005622,GO:0005623,GO:0005737,GO:0005739,GO:0005759,GO:0006412,GO:0006414,GO:0006518,GO:0006807,GO:0008135,GO:0008150,GO:0008152,GO:0009058,GO:0009059,GO:0009987,GO:0010467,GO:0016462,GO:0016787,GO:0016817,GO:0016818,GO:0017076,GO:0017111,GO:0019001,GO:…						ko00000,ko03012,ko03029,ko04147				Fungi	1GSWU@112252,38BHM@33154,3NV4W@4751,COG0050@1,KOG0460@2759	NA|NA|NA	J	This protein promotes the GTP-dependent binding of aminoacyl-tRNA to the A-site of ribosomes during protein biosynthesis
MA-00120-24	NdufV2	ko:K03943	0.015754	0.49109	DOWN	Thioredoxin-like [2Fe-2S] ferredoxin	78898.MVEG_08581T0	2.5e-119	434.9	Fungi incertae sedis	GO:0003674,GO:0003824,GO:0003954,GO:0005575,GO:0005622,GO:0005623,GO:0005737,GO:0005739,GO:0005740,GO:0005743,GO:0005746,GO:0005747,GO:0006091,GO:0006119,GO:0006120,GO:0006139,GO:0006163,GO:0006725,GO:0006753,GO:0006793,GO:0006796,GO:0006807,GO:0008137,GO:0008150,GO:0008152,GO:0009117,GO:0009123,GO:0009126,GO:0009141,GO:0009144,GO:0009150,GO:0009161,GO:0009167,GO:0009199,GO:0009205,GO:0009259,GO:…	1.6.5.3,1.6.99.3	ko00190,ko01100,ko04714,ko04723,ko04932,ko05010,ko05012,ko05016,map00190,map01100,map04714,map04723,map04932,map05010,map05012,map05016	M00143	R11945	RC00061	ko00000,ko00001,ko00002,ko01000	3.D.1.6			Fungi	1GSUM@112252,38G5A@33154,3NV79@4751,COG1905@1,KOG3196@2759	NA|NA|NA	C	Thioredoxin-like [2Fe-2S] ferredoxin
MA-00120-147	ILV2	ko:K01652	0.023636	0.15381	DOWN	Thiamine pyrophosphate enzyme, N-terminal TPP binding domain	78898.MVEG_08599T0	0	1137.9	Fungi incertae sedis	GO:0000166,GO:0003674,GO:0003824,GO:0003984,GO:0005488,GO:0005575,GO:0005622,GO:0005623,GO:0005737,GO:0005739,GO:0005948,GO:0006082,GO:0006520,GO:0006549,GO:0006573,GO:0006807,GO:0008150,GO:0008152,GO:0008652,GO:0009058,GO:0009081,GO:0009082,GO:0009097,GO:0009099,GO:0009987,GO:0016053,GO:0016740,GO:0016744,GO:0019752,GO:0032991,GO:0036094,GO:0043167,GO:0043168,GO:0043226,GO:0043227,GO:0043229,GO:…	2.2.1.6	ko00290,ko00650,ko00660,ko00770,ko01100,ko01110,ko01130,ko01210,ko01230,map00290,map00650,map00660,map00770,map01100,map01110,map01130,map01210,map01230	M00019,M00570	R00006,R00014,R00226,R03050,R04672,R04673,R08648	RC00027,RC00106,RC01192,RC02744,RC02893	ko00000,ko00001,ko00002,ko01000				Fungi	1GSY5@112252,39J92@33154,3NVDF@4751,COG0028@1,KOG4166@2759	NA|NA|NA	EH	Thiamine pyrophosphate enzyme, N-terminal TPP binding domain
MA-00101-610	GCV2	ko:K00281	0.011374	0.36133	DOWN	The glycine cleavage system catalyzes the degradation of glycine	78898.MVEG_09102T0	0	1956.4	Fungi incertae sedis	GO:0001505,GO:0003674,GO:0003824,GO:0004375,GO:0005575,GO:0005622,GO:0005623,GO:0005737,GO:0005739,GO:0005960,GO:0006082,GO:0006520,GO:0006544,GO:0006546,GO:0006730,GO:0006807,GO:0008150,GO:0008152,GO:0009056,GO:0009063,GO:0009069,GO:0009071,GO:0009987,GO:0016054,GO:0016491,GO:0016638,GO:0016642,GO:0017144,GO:0019464,GO:0019752,GO:0032991,GO:0042133,GO:0042135,GO:0042737,GO:0043226,GO:0043227,GO:…	1.4.4.2	ko00260,ko00630,ko01100,ko01110,ko01130,ko01200,map00260,map00630,map01100,map01110,map01130,map01200	M00532	R01221,R03425	RC00022,RC00929,RC02834,RC02880	ko00000,ko00001,ko00002,ko01000				Fungi	1GSFE@112252,38E0D@33154,3NWQC@4751,COG1003@1,KOG2040@2759	NA|NA|NA	E	The glycine cleavage system catalyzes the degradation of glycine
MA-00213-86	TOM70	ko:K17768	0.012591	0.16686	DOWN	Tetratricopeptide repeat	78898.MVEG_00945T0	7.4e-181	640.6	Fungi incertae sedis	GO:0003674,GO:0005048,GO:0005215,GO:0005488,GO:0005575,GO:0005622,GO:0005623,GO:0005737,GO:0005739,GO:0005740,GO:0005741,GO:0005742,GO:0006605,GO:0006626,GO:0006810,GO:0006839,GO:0006886,GO:0006996,GO:0007005,GO:0007006,GO:0007007,GO:0008104,GO:0008150,GO:0008565,GO:0009987,GO:0015031,GO:0015833,GO:0016020,GO:0016021,GO:0016043,GO:0017038,GO:0019867,GO:0030150,GO:0030943,GO:0031090,GO:0031224,GO:…						ko00000,ko02000,ko03029	3.A.8.1			Fungi	1GS7B@112252,38BB8@33154,3NUNW@4751,KOG0547@1,KOG0547@2759	NA|NA|NA	U	Tetratricopeptide repeat
MA-00153-34		ko:K04564	0.00028332	0.10262	DOWN	Superoxide dismutase	78898.MVEG_09673T0	7.3e-128	463.4	Fungi	GO:0000302,GO:0000303,GO:0000305,GO:0000313,GO:0000314,GO:0003674,GO:0003735,GO:0003824,GO:0004784,GO:0005198,GO:0005575,GO:0005622,GO:0005623,GO:0005737,GO:0005739,GO:0005759,GO:0005761,GO:0005763,GO:0005840,GO:0006412,GO:0006518,GO:0006801,GO:0006807,GO:0006950,GO:0006979,GO:0008150,GO:0008152,GO:0009058,GO:0009059,GO:0009636,GO:0009987,GO:0010035,GO:0010467,GO:0015935,GO:0016209,GO:0016491,GO:…	1.15.1.1	ko04013,ko04068,ko04146,ko04211,ko04212,ko04213,ko05016,map04013,map04068,map04146,map04211,map04212,map04213,map05016				ko00000,ko00001,ko01000				Fungi	39R8N@33154,3P538@4751,COG0605@1,KOG0876@2759	NA|NA|NA	J	Superoxide dismutase
MA-00073-621	ARO3	ko:K01626	0.0018172	0.042259	DOWN	Stereospecific condensation of phosphoenolpyruvate (PEP) and D-erythrose-4-phosphate (E4P) giving rise to 3-deoxy-D- arabino-heptulosonate-7-phosphate (DAHP)	78898.MVEG_06798T0	4.1e-193	680.6	Fungi incertae sedis	GO:0003674,GO:0003824,GO:0003849,GO:0005575,GO:0005622,GO:0005623,GO:0005634,GO:0005737,GO:0005739,GO:0006082,GO:0006520,GO:0006725,GO:0006807,GO:0008150,GO:0008152,GO:0008652,GO:0009058,GO:0009072,GO:0009073,GO:0009423,GO:0009987,GO:0016053,GO:0016740,GO:0016765,GO:0019438,GO:0019752,GO:0043226,GO:0043227,GO:0043229,GO:0043231,GO:0043436,GO:0043648,GO:0043650,GO:0044237,GO:0044238,GO:0044249,GO:…	2.5.1.54	ko00400,ko01100,ko01110,ko01130,ko01230,ko02024,map00400,map01100,map01110,map01130,map01230,map02024	M00022	R01826	RC00435	ko00000,ko00001,ko00002,ko01000				Fungi	1GT5T@112252,2QPSU@2759,38CAA@33154,3NVDJ@4751,COG0722@1	NA|NA|NA	E	Stereospecific condensation of phosphoenolpyruvate (PEP) and D-erythrose-4-phosphate (E4P) giving rise to 3-deoxy-D- arabino-heptulosonate-7-phosphate (DAHP)
MA-00055-2	tmk1	ko:K04371	0.040216	0.4836	DOWN	Serine/Threonine protein kinases, catalytic domain	78898.MVEG_10615T0	1.4e-187	662.1	Fungi incertae sedis	GO:0000003,GO:0000165,GO:0000166,GO:0000746,GO:0000747,GO:0000749,GO:0000750,GO:0001403,GO:0001932,GO:0001933,GO:0003006,GO:0003674,GO:0003824,GO:0004672,GO:0004674,GO:0004707,GO:0005488,GO:0005524,GO:0005575,GO:0005622,GO:0005623,GO:0005634,GO:0005737,GO:0005739,GO:0005937,GO:0006464,GO:0006468,GO:0006793,GO:0006796,GO:0006807,GO:0007049,GO:0007050,GO:0007154,GO:0007165,GO:0007186,GO:0008144,GO:…	2.7.11.24	ko01521,ko01522,ko01524,ko04010,ko04011,ko04012,ko04013,ko04014,ko04015,ko04022,ko04024,ko04062,ko04066,ko04068,ko04071,ko04072,ko04114,ko04140,ko04150,ko04151,ko04210,ko04214,ko04218,ko04261,ko04270,ko04320,ko04350,ko04360,ko04370,ko04371,ko04380,ko04510,ko04520,ko04540,ko04550,ko04611,ko04620,ko04621,ko04650,ko04657,ko04658,ko04659,ko04660,ko04662,ko04664,ko04666,ko04668,ko04713,ko04720,ko04722…	M00687			ko00000,ko00001,ko00002,ko01000,ko01001,ko03036,ko04147				Fungi	1GS18@112252,38BZX@33154,3NUS8@4751,KOG0660@1,KOG0660@2759	NA|NA|NA	T	Serine/Threonine protein kinases, catalytic domain
MA-00300-2	SHM1	ko:K00600	0.010619	0.46481	DOWN	Serine hydroxymethyltransferase	78898.MVEG_02976T0	1.1e-248	865.5	Fungi incertae sedis	GO:0003674,GO:0003824,GO:0004372,GO:0005575,GO:0005622,GO:0005623,GO:0005737,GO:0005739,GO:0006082,GO:0006520,GO:0006730,GO:0006807,GO:0008150,GO:0008152,GO:0008652,GO:0009058,GO:0009069,GO:0009070,GO:0009987,GO:0016053,GO:0016740,GO:0016741,GO:0016742,GO:0019752,GO:0043226,GO:0043227,GO:0043229,GO:0043231,GO:0043436,GO:0044237,GO:0044238,GO:0044249,GO:0044281,GO:0044283,GO:0044424,GO:0044444,GO:…	2.1.2.1	ko00260,ko00460,ko00630,ko00670,ko00680,ko01100,ko01110,ko01120,ko01130,ko01200,ko01230,ko01523,map00260,map00460,map00630,map00670,map00680,map01100,map01110,map01120,map01130,map01200,map01230,map01523	M00140,M00141,M00346,M00532	R00945,R09099	RC00022,RC00112,RC01583,RC02958	ko00000,ko00001,ko00002,ko01000			iMM904.YBR263W,iND750.YBR263W	Fungi	1GSHR@112252,38EKT@33154,3NVHZ@4751,COG0112@1,KOG2467@2759	NA|NA|NA	H	Serine hydroxymethyltransferase
MA-00139-32	6	ko:K12659	0.0067676	0.42994	DOWN	Semialdehyde dehydrogenase, NAD binding domain	78898.MVEG_09183T0	0	1527.7	Fungi incertae sedis	GO:0003674,GO:0003824,GO:0003942,GO:0003991,GO:0004042,GO:0005488,GO:0005575,GO:0005622,GO:0005623,GO:0005737,GO:0005739,GO:0005759,GO:0006082,GO:0006355,GO:0006520,GO:0006525,GO:0006526,GO:0006591,GO:0006592,GO:0006793,GO:0006796,GO:0006807,GO:0008080,GO:0008150,GO:0008152,GO:0008652,GO:0009058,GO:0009064,GO:0009084,GO:0009889,GO:0009987,GO:0010468,GO:0010556,GO:0016053,GO:0016301,GO:0016310,GO:…	1.2.1.38,2.7.2.8	ko00220,ko01100,ko01110,ko01130,ko01210,ko01230,map00220,map01100,map01110,map01130,map01210,map01230	M00028	R02649,R03443	RC00002,RC00043,RC00684	ko00000,ko00001,ko00002,ko01000			iMM904.YER069W,iND750.YER069W	Fungi	1GSBE@112252,38FTK@33154,3NW51@4751,COG0002@1,COG0548@1,KOG2436@2759,KOG4354@2759	NA|NA|NA	E	Semialdehyde dehydrogenase, NAD binding domain
MA-00090-238			0.018966	0.38333	DOWN	S4 RNA-binding domain	78898.MVEG_06219T0	9.4e-119	433	Fungi incertae sedis	GO:0000313,GO:0000314,GO:0003674,GO:0003676,GO:0003723,GO:0003735,GO:0005198,GO:0005488,GO:0005575,GO:0005622,GO:0005623,GO:0005737,GO:0005739,GO:0005759,GO:0005761,GO:0005763,GO:0005840,GO:0006412,GO:0006417,GO:0006450,GO:0006518,GO:0006807,GO:0008150,GO:0008152,GO:0009058,GO:0009059,GO:0009889,GO:0009891,GO:0009893,GO:0009987,GO:0010467,GO:0010468,GO:0010556,GO:0010557,GO:0010604,GO:0010608,GO:…										Fungi	1GTFN@112252,2QTS9@2759,39V94@33154,3NX7I@4751,COG0522@1	NA|NA|NA	J	S4 RNA-binding domain
MA-00334-475	ZUO1	ko:K01640,ko:K09522	0.025821	0.25748	DOWN	Ribosome-associated complex head domain	78898.MVEG_10587T0	2e-188	665.2	Fungi incertae sedis	GO:0000054,GO:0002181,GO:0002182,GO:0003674,GO:0005488,GO:0005515,GO:0005575,GO:0005622,GO:0005623,GO:0005634,GO:0005730,GO:0005737,GO:0005739,GO:0005840,GO:0005844,GO:0006139,GO:0006364,GO:0006396,GO:0006403,GO:0006405,GO:0006412,GO:0006414,GO:0006450,GO:0006452,GO:0006457,GO:0006458,GO:0006518,GO:0006611,GO:0006725,GO:0006807,GO:0006810,GO:0006886,GO:0006913,GO:0008104,GO:0008150,GO:0008152,GO:…	4.1.3.4	ko00072,ko00280,ko00281,ko00650,ko01100,ko04146,map00072,map00280,map00281,map00650,map01100,map04146	M00036,M00088	R01360,R08090	RC00502,RC00503,RC01118,RC01946	ko00000,ko00001,ko00002,ko01000,ko03110				Fungi	1GT9Z@112252,38C3A@33154,3NVPA@4751,KOG0724@1,KOG0724@2759	NA|NA|NA	O	Ribosome-associated complex head domain
MA-00055-247		ko:K02967	0.0018172	0.15504	DOWN	Ribosomal protein S2	78898.MVEG_10173T0	2.3e-147	528.5	Fungi incertae sedis	GO:0000049,GO:0000313,GO:0000314,GO:0003674,GO:0003676,GO:0003723,GO:0003735,GO:0005198,GO:0005488,GO:0005575,GO:0005622,GO:0005623,GO:0005737,GO:0005739,GO:0005759,GO:0005761,GO:0005763,GO:0005840,GO:0006412,GO:0006518,GO:0006807,GO:0008150,GO:0008152,GO:0009058,GO:0009059,GO:0009987,GO:0010467,GO:0015935,GO:0019538,GO:0031974,GO:0032543,GO:0032991,GO:0034641,GO:0034645,GO:0043043,GO:0043170,GO:…		ko03010,map03010	M00178,M00179			br01610,ko00000,ko00001,ko00002,ko03011				Fungi	1GTGG@112252,38BFI@33154,3NV5T@4751,COG0052@1,KOG0832@2759	NA|NA|NA	J	Ribosomal protein S2
MA-00268-104	MNP1	ko:K02935	0.012591	0.40962	DOWN	Ribosomal protein L7/L12 dimerisation domain	78898.MVEG_11552T0	2.9e-64	251.5	Fungi incertae sedis	GO:0000313,GO:0000315,GO:0003674,GO:0003735,GO:0005198,GO:0005575,GO:0005622,GO:0005623,GO:0005737,GO:0005739,GO:0005759,GO:0005761,GO:0005762,GO:0005840,GO:0006412,GO:0006518,GO:0006807,GO:0008150,GO:0008152,GO:0009058,GO:0009059,GO:0009295,GO:0009987,GO:0010467,GO:0015934,GO:0019538,GO:0031974,GO:0032543,GO:0032991,GO:0034641,GO:0034645,GO:0042645,GO:0043043,GO:0043170,GO:0043226,GO:0043227,GO:…		ko03010,map03010	M00178			br01610,ko00000,ko00001,ko00002,ko03011				Fungi	1GU01@112252,3A5P9@33154,3P1TG@4751,COG0222@1,KOG1715@2759	NA|NA|NA	J	Ribosomal protein L7/L12 dimerisation domain
MA-00268-169	NdufS2	ko:K03935	0.022351	0.49209	DOWN	Respiratory-chain NADH dehydrogenase, 49 Kd subunit	78898.MVEG_11652T0	2.9e-244	850.9	Fungi incertae sedis	GO:0005575,GO:0005622,GO:0005623,GO:0005737,GO:0005739,GO:0005740,GO:0005743,GO:0016020,GO:0019866,GO:0031090,GO:0031966,GO:0031967,GO:0031975,GO:0043226,GO:0043227,GO:0043229,GO:0043231,GO:0044422,GO:0044424,GO:0044429,GO:0044444,GO:0044446,GO:0044464	1.6.5.3,1.6.99.3	ko00190,ko01100,ko04714,ko04723,ko04932,ko05010,ko05012,ko05016,map00190,map01100,map04714,map04723,map04932,map05010,map05012,map05016	M00143	R11945	RC00061	ko00000,ko00001,ko00002,ko01000	3.D.1.6			Fungi	1GT1H@112252,38E8K@33154,3NVGU@4751,COG0649@1,KOG2870@2759	NA|NA|NA	C	Respiratory-chain NADH dehydrogenase, 49 Kd subunit
MA-00334-341	CHA1	ko:K17989	0.031573	0.346	DOWN	Pyridoxal-phosphate dependent enzyme	78898.MVEG_00941T0	1e-127	463.4	Fungi incertae sedis	GO:0003674,GO:0003824,GO:0003941,GO:0004794,GO:0005575,GO:0005622,GO:0005623,GO:0005737,GO:0005739,GO:0005759,GO:0006082,GO:0006520,GO:0006563,GO:0006565,GO:0006566,GO:0006567,GO:0006807,GO:0008150,GO:0008152,GO:0009056,GO:0009063,GO:0009066,GO:0009068,GO:0009069,GO:0009071,GO:0009295,GO:0009987,GO:0016054,GO:0016829,GO:0016840,GO:0016841,GO:0019752,GO:0031974,GO:0042645,GO:0043226,GO:0043227,GO:…	4.3.1.17,4.3.1.19	ko00260,ko00270,ko00290,ko01100,ko01110,ko01130,ko01200,ko01230,map00260,map00270,map00290,map01100,map01110,map01130,map01200,map01230	M00570	R00220,R00590,R00996	RC00331,RC00418,RC02600	ko00000,ko00001,ko00002,ko01000				Fungi	1GTM6@112252,38BCJ@33154,3NZW4@4751,COG1171@1,KOG1250@2759	NA|NA|NA	E	Pyridoxal-phosphate dependent enzyme
MA-00326-188	ATP2	ko:K00700,ko:K02133	0.02957	0.45852	DOWN	Produces ATP from ADP in the presence of a proton gradient across the membrane	78898.MVEG_12229T0	1.6e-280	971.5	Fungi incertae sedis	GO:0000166,GO:0000275,GO:0003674,GO:0003824,GO:0005215,GO:0005488,GO:0005575,GO:0005622,GO:0005623,GO:0005737,GO:0005739,GO:0005740,GO:0005743,GO:0005753,GO:0005754,GO:0006091,GO:0006119,GO:0006139,GO:0006163,GO:0006164,GO:0006725,GO:0006753,GO:0006754,GO:0006793,GO:0006796,GO:0006807,GO:0006810,GO:0006811,GO:0006812,GO:0006839,GO:0008150,GO:0008152,GO:0008324,GO:0009058,GO:0009117,GO:0009123,GO:…	2.4.1.18,3.6.3.14	ko00190,ko00500,ko01100,ko01110,ko04714,ko05010,ko05012,ko05016,map00190,map00500,map01100,map01110,map04714,map05010,map05012,map05016	M00158,M00565	R02110		ko00000,ko00001,ko00002,ko01000,ko04147	3.A.2.1	CBM48,GH13		Fungi	1GVA1@112252,38CQ6@33154,3NVU5@4751,COG0055@1,KOG1350@2759	NA|NA|NA	C	Produces ATP from ADP in the presence of a proton gradient across the membrane
MA-00326-181	CCP1	ko:K00428	0.0067676	0.31919	DOWN	Peroxidase	78898.MVEG_05884T0	2e-157	562	Fungi incertae sedis	GO:0000302,GO:0003674,GO:0003824,GO:0004130,GO:0004601,GO:0005575,GO:0005622,GO:0005623,GO:0005737,GO:0005739,GO:0005740,GO:0005758,GO:0006950,GO:0006979,GO:0008150,GO:0008152,GO:0009056,GO:0009636,GO:0009987,GO:0016209,GO:0016491,GO:0016684,GO:0016999,GO:0017001,GO:0017144,GO:0031967,GO:0031970,GO:0031974,GO:0031975,GO:0033554,GO:0034599,GO:0042221,GO:0042737,GO:0042743,GO:0042744,GO:0043226,GO:…	1.11.1.5					ko00000,ko01000				Fungi	1GSN2@112252,2QR1E@2759,38E3T@33154,3NW1F@4751,COG0685@1	NA|NA|NA	E	Peroxidase
MA-00101-486	NdufS1	ko:K03934	0.0092634	0.37158	DOWN	NADH-ubiquinone oxidoreductase-G iron-sulfur binding region	78898.MVEG_08952T0	0	1348.2	Fungi incertae sedis	GO:0003674,GO:0003824,GO:0003954,GO:0005488,GO:0005575,GO:0005622,GO:0005623,GO:0005737,GO:0005739,GO:0005740,GO:0005743,GO:0005746,GO:0005747,GO:0006091,GO:0008137,GO:0008150,GO:0008152,GO:0009987,GO:0015980,GO:0016020,GO:0016491,GO:0016651,GO:0016655,GO:0019866,GO:0030964,GO:0031090,GO:0031966,GO:0031967,GO:0031975,GO:0032991,GO:0043226,GO:0043227,GO:0043229,GO:0043231,GO:0044237,GO:0044422,GO:…	1.6.5.3,1.6.99.3	ko00190,ko01100,ko04714,ko04723,ko04932,ko05010,ko05012,ko05016,map00190,map01100,map04714,map04723,map04932,map05010,map05012,map05016	M00143	R11945	RC00061	ko00000,ko00001,ko00002,ko01000	3.D.1.6			Fungi	1GSKY@112252,38DHR@33154,3NW5Z@4751,COG1034@1,KOG2282@2759	NA|NA|NA	C	NADH-ubiquinone oxidoreductase-G iron-sulfur binding region
MA-00090-522	GDH2	ko:K15371	0.015754	0.049056	DOWN	NAD( )-dependent glutamate dehydrogenase which degrades glutamate to ammonia and alpha-ketoglutarate	78898.MVEG_03967T0	0	1936	Fungi incertae sedis	GO:0003674,GO:0003824,GO:0004352,GO:0004353,GO:0005575,GO:0005622,GO:0005623,GO:0005737,GO:0005739,GO:0006082,GO:0006103,GO:0006106,GO:0006520,GO:0006536,GO:0006538,GO:0006807,GO:0008150,GO:0008152,GO:0009056,GO:0009063,GO:0009064,GO:0009065,GO:0009987,GO:0016054,GO:0016491,GO:0016638,GO:0016639,GO:0019551,GO:0019752,GO:0043226,GO:0043227,GO:0043229,GO:0043231,GO:0043436,GO:0043648,GO:0043649,GO:…	1.4.1.2	ko00220,ko00250,ko00430,ko00910,ko01100,map00220,map00250,map00430,map00910,map01100		R00243	RC00006,RC02799	ko00000,ko00001,ko01000				Fungi	1GVDJ@112252,390UX@33154,3NVNH@4751,COG0334@1,KOG2250@2759	NA|NA|NA	E	NAD( )-dependent glutamate dehydrogenase which degrades glutamate to ammonia and alpha-ketoglutarate
MA-00112-222	QCR8	ko:K00418	0.028306	0.39122	DOWN	Mortierella verticillata NRRL 6337 ubiquinol-cytochrome c reductase subunit 8 (92 aa)	78898.MVEG_05643T0	3.5e-42	177.2	Fungi incertae sedis	GO:0005575,GO:0005622,GO:0005623,GO:0005737,GO:0005739,GO:0005740,GO:0005743,GO:0005746,GO:0005750,GO:0006091,GO:0006119,GO:0006122,GO:0006139,GO:0006163,GO:0006725,GO:0006753,GO:0006793,GO:0006796,GO:0006807,GO:0008150,GO:0008152,GO:0009060,GO:0009117,GO:0009123,GO:0009126,GO:0009141,GO:0009144,GO:0009150,GO:0009161,GO:0009167,GO:0009199,GO:0009205,GO:0009259,GO:0009987,GO:0015980,GO:0016020,GO:…		ko00190,ko01100,ko04260,ko04714,ko04932,ko05010,ko05012,ko05016,map00190,map01100,map04260,map04714,map04932,map05010,map05012,map05016	M00152			ko00000,ko00001,ko00002			iMM904.YJL166W,iND750.YJL166W	Fungi	1GUMW@112252,3A6MP@33154,3P5D2@4751,KOG4116@1,KOG4116@2759	NA|NA|NA	C	Mortierella verticillata NRRL 6337 ubiquinol-cytochrome c reductase subunit 8 (92 aa)
MA-00101-468	NdufS8	ko:K03941	0.0067676	0.40007	DOWN	Mortierella verticillata NRRL 6337 NADH dehydrogenase ubiquinone iron-sulfur protein 8, mitochondrial	78898.MVEG_09019T0	6.6e-81	307	Fungi incertae sedis	GO:0005575,GO:0005622,GO:0005623,GO:0005737,GO:0005739,GO:0043226,GO:0043227,GO:0043229,GO:0043231,GO:0044424,GO:0044444,GO:0044464	1.6.5.3,1.6.99.3	ko00190,ko01100,ko04714,ko04723,ko04932,ko05010,ko05012,ko05016,map00190,map01100,map04714,map04723,map04932,map05010,map05012,map05016	M00143	R11945	RC00061	ko00000,ko00001,ko00002,ko01000	3.D.1.6			Fungi	1GS0Z@112252,38HK4@33154,3NVE7@4751,COG1143@1,KOG3256@2759	NA|NA|NA	C	Mortierella verticillata NRRL 6337 NADH dehydrogenase ubiquinone iron-sulfur protein 8, mitochondrial
MA-00067-295	ATP16	ko:K02134	0.0049162	0.30122	DOWN	Mortierella verticillata NRRL 6337 F-type H -transporting ATPase subunit delta (160 aa)	78898.MVEG_01069T0	2.8e-58	231.5	Fungi incertae sedis	GO:0000275,GO:0005575,GO:0005622,GO:0005623,GO:0005737,GO:0005739,GO:0005740,GO:0005743,GO:0005753,GO:0005756,GO:0006091,GO:0006119,GO:0006139,GO:0006163,GO:0006164,GO:0006725,GO:0006753,GO:0006754,GO:0006793,GO:0006796,GO:0006807,GO:0006810,GO:0006811,GO:0006812,GO:0006839,GO:0008150,GO:0008152,GO:0009058,GO:0009117,GO:0009123,GO:0009124,GO:0009126,GO:0009127,GO:0009141,GO:0009142,GO:0009144,GO:…		ko00190,ko01100,ko04714,ko05010,ko05012,ko05016,map00190,map01100,map04714,map05010,map05012,map05016	M00158			ko00000,ko00001,ko00002	3.A.2.1		iMM904.YDL004W,iND750.YDL004W	Fungi	1GTTR@112252,3A5WF@33154,3P4C9@4751,COG0355@1,KOG1758@2759	NA|NA|NA	C	Mortierella verticillata NRRL 6337 F-type H -transporting ATPase subunit delta (160 aa)
MA-00334-304	COX6	ko:K02264	0.013058	0.38739	DOWN	Mortierella verticillata NRRL 6337 cytochrome c oxidase subunit Va (141 aa)	78898.MVEG_10037T0	1.2e-62	245.7	Fungi incertae sedis	GO:0003674,GO:0003824,GO:0004129,GO:0005215,GO:0005575,GO:0005622,GO:0005623,GO:0005737,GO:0005739,GO:0005740,GO:0005743,GO:0005746,GO:0005751,GO:0006091,GO:0006119,GO:0006123,GO:0006139,GO:0006163,GO:0006725,GO:0006753,GO:0006793,GO:0006796,GO:0006807,GO:0006810,GO:0006811,GO:0006812,GO:0008150,GO:0008152,GO:0008324,GO:0009055,GO:0009060,GO:0009117,GO:0009123,GO:0009126,GO:0009141,GO:0009144,GO:…		ko00190,ko01100,ko04260,ko04714,ko04932,ko05010,ko05012,ko05016,map00190,map01100,map04260,map04714,map04932,map05010,map05012,map05016	M00154			ko00000,ko00001,ko00002	3.D.4.11,3.D.4.8		iMM904.YHR051W,iND750.YHR051W	Fungi	1GU0F@112252,3A45U@33154,3P3UI@4751,KOG4077@1,KOG4077@2759	NA|NA|NA	C	Mortierella verticillata NRRL 6337 cytochrome c oxidase subunit Va (141 aa)
MA-00120-150	ILV6	ko:K01653	0.0018172	0.10859	DOWN	Mortierella verticillata NRRL 6337 acetolactate synthase I III small subunit (309 aa)	78898.MVEG_01592T0	1.8e-129	468.8	Fungi incertae sedis	GO:0003674,GO:0005575,GO:0005622,GO:0005623,GO:0005737,GO:0005739,GO:0005759,GO:0005948,GO:0006082,GO:0006520,GO:0006549,GO:0006551,GO:0006573,GO:0006807,GO:0008150,GO:0008152,GO:0008652,GO:0009058,GO:0009081,GO:0009082,GO:0009097,GO:0009098,GO:0009099,GO:0009295,GO:0009987,GO:0016053,GO:0019752,GO:0030234,GO:0031974,GO:0032991,GO:0042645,GO:0043226,GO:0043227,GO:0043228,GO:0043229,GO:0043231,GO:…	2.2.1.6	ko00290,ko00650,ko00660,ko00770,ko01100,ko01110,ko01130,ko01210,ko01230,map00290,map00650,map00660,map00770,map01100,map01110,map01130,map01210,map01230	M00019,M00570	R00006,R00014,R00226,R03050,R04672,R04673,R08648	RC00027,RC00106,RC01192,RC02744,RC02893	ko00000,ko00001,ko00002,ko01000				Fungi	1GT4G@112252,38EH4@33154,3NUVU@4751,COG0440@1,KOG2663@2759	NA|NA|NA	E	Mortierella verticillata NRRL 6337 acetolactate synthase I III small subunit (309 aa)
MA-00307-1	URA2	ko:K01954,ko:K11541	0.0068903	0.37956	DOWN	Mortierella verticillata NRRL 6337	78898.MVEG_05483T0	0	2569.7	Fungi incertae sedis	GO:0000050,GO:0003674,GO:0003824,GO:0003922,GO:0004070,GO:0004087,GO:0004088,GO:0004151,GO:0005575,GO:0005622,GO:0005623,GO:0005737,GO:0005739,GO:0006082,GO:0006139,GO:0006142,GO:0006206,GO:0006207,GO:0006520,GO:0006525,GO:0006526,GO:0006541,GO:0006725,GO:0006807,GO:0008150,GO:0008152,GO:0008652,GO:0009058,GO:0009064,GO:0009084,GO:0009112,GO:0009892,GO:0009987,GO:0016020,GO:0016021,GO:0016053,GO:…	2.1.3.2,6.3.5.5	ko00240,ko00250,ko01100,map00240,map00250,map01100	M00051	R00256,R00575,R01395,R01397,R10948,R10949	RC00002,RC00010,RC00043,RC00064,RC02750,RC02798,RC02850,RC03314	ko00000,ko00001,ko00002,ko01000				Fungi	1GV11@112252,38CAC@33154,3NW85@4751,COG0458@1,KOG0370@2759	NA|NA|NA	F	Mortierella verticillata NRRL 6337
MA-00184-79	URA2	ko:K01954,ko:K11541	0.010581	0.30605	DOWN	Mortierella verticillata NRRL 6337	78898.MVEG_07487T0	2.1e-167	595.1	Fungi incertae sedis	GO:0000050,GO:0003674,GO:0003824,GO:0003922,GO:0004070,GO:0004087,GO:0004088,GO:0004151,GO:0005575,GO:0005622,GO:0005623,GO:0005737,GO:0005739,GO:0006082,GO:0006139,GO:0006142,GO:0006206,GO:0006207,GO:0006520,GO:0006525,GO:0006526,GO:0006541,GO:0006725,GO:0006807,GO:0008150,GO:0008152,GO:0008652,GO:0009058,GO:0009064,GO:0009084,GO:0009112,GO:0009892,GO:0009987,GO:0016020,GO:0016021,GO:0016053,GO:…	2.1.3.2,6.3.5.5	ko00240,ko00250,ko01100,map00240,map00250,map01100	M00051	R00256,R00575,R01395,R01397,R10948,R10949	RC00002,RC00010,RC00043,RC00064,RC02750,RC02798,RC02850,RC03314	ko00000,ko00001,ko00002,ko01000				Fungi	1GV11@112252,38CAC@33154,3NW85@4751,COG0458@1,KOG0370@2759	NA|NA|NA	F	Mortierella verticillata NRRL 6337
MA-00184-381	FAA2	ko:K01897	0.027325	0.29855	DOWN	Mortierella verticillata NRRL 6337	78898.MVEG_07213T0	9.2e-276	956.1	Fungi incertae sedis	GO:0001676,GO:0003674,GO:0003824,GO:0004467,GO:0005575,GO:0005622,GO:0005623,GO:0005737,GO:0005739,GO:0005777,GO:0006082,GO:0006629,GO:0006631,GO:0008150,GO:0008152,GO:0009987,GO:0015645,GO:0016405,GO:0016874,GO:0016877,GO:0016878,GO:0019752,GO:0031956,GO:0031957,GO:0032787,GO:0042579,GO:0043226,GO:0043227,GO:0043229,GO:0043231,GO:0043436,GO:0044237,GO:0044238,GO:0044255,GO:0044281,GO:0044424,GO:…	6.2.1.3	ko00061,ko00071,ko01100,ko01212,ko02024,ko03320,ko04146,ko04216,ko04714,ko04920,map00061,map00071,map01100,map01212,map02024,map03320,map04146,map04216,map04714,map04920	M00086	R01280	RC00004,RC00014	ko00000,ko00001,ko00002,ko01000,ko01004,ko04147	4.C.1.1			Fungi	1GSPT@112252,38BK9@33154,3NUAR@4751,COG1022@1,KOG1256@2759	NA|NA|NA	I	Mortierella verticillata NRRL 6337
MA-00067-219	YBT1		0.010619	0.17486	DOWN	Mortierella verticillata NRRL 6337	78898.MVEG_09994T0	0	2603.5	Fungi incertae sedis	GO:0000322,GO:0000323,GO:0000324,GO:0000329,GO:0003674,GO:0003824,GO:0005215,GO:0005310,GO:0005319,GO:0005342,GO:0005575,GO:0005622,GO:0005623,GO:0005737,GO:0005739,GO:0005773,GO:0005774,GO:0005783,GO:0006810,GO:0006811,GO:0006820,GO:0006835,GO:0006869,GO:0006914,GO:0008028,GO:0008150,GO:0008152,GO:0008509,GO:0008514,GO:0009056,GO:0009987,GO:0010035,GO:0010038,GO:0010876,GO:0012505,GO:0015075,GO:…										Fungi	1GS9T@112252,38DEW@33154,3NUKV@4751,COG1132@1,KOG0054@2759	NA|NA|NA	Q	Mortierella verticillata NRRL 6337
MA-00073-551	ATP17	ko:K02139	0.011066	0.30313	DOWN	Mitochondrial F1-F0 ATP synthase subunit F of fungi	78898.MVEG_02158T0	2.3e-45	188	Fungi incertae sedis	GO:0000276,GO:0005575,GO:0005622,GO:0005623,GO:0005737,GO:0005739,GO:0005740,GO:0005743,GO:0005753,GO:0006091,GO:0006119,GO:0006139,GO:0006163,GO:0006164,GO:0006725,GO:0006753,GO:0006754,GO:0006793,GO:0006796,GO:0006807,GO:0006810,GO:0006811,GO:0006812,GO:0006839,GO:0008150,GO:0008152,GO:0009058,GO:0009117,GO:0009123,GO:0009124,GO:0009126,GO:0009127,GO:0009141,GO:0009142,GO:0009144,GO:0009145,GO:…		ko00190,ko01100,map00190,map01100	M00158			ko00000,ko00001,ko00002	3.A.2.1			Fungi	1GUHJ@112252,2DZJU@1,2S739@2759,3A41Z@33154,3P4M2@4751	NA|NA|NA	S	Mitochondrial F1-F0 ATP synthase subunit F of fungi
MA-00101-410	MIR1	ko:K15102	0.0015215	0.35626	DOWN	Mitochondrial carrier protein	78898.MVEG_08869T0	8.3e-160	569.7	Fungi incertae sedis	GO:0003674,GO:0005215,GO:0005315,GO:0005575,GO:0005622,GO:0005623,GO:0005737,GO:0005739,GO:0005740,GO:0005743,GO:0006810,GO:0006811,GO:0006817,GO:0006820,GO:0006839,GO:0008150,GO:0015291,GO:0015318,GO:0015698,GO:0016020,GO:0016021,GO:0019866,GO:0022804,GO:0022857,GO:0031090,GO:0031224,GO:0031300,GO:0031301,GO:0031304,GO:0031305,GO:0031966,GO:0031967,GO:0031975,GO:0032592,GO:0034220,GO:0035435,GO:…						ko00000,ko02000,ko04147	2.A.29.4		iMM904.YJR077C,iND750.YJR077C	Fungi	1GT11@112252,38DBA@33154,3NTWE@4751,KOG0767@1,KOG0767@2759	NA|NA|NA	C	Mitochondrial carrier protein
MA-00323-110		ko:K15110	0.023776	0.26204	DOWN	Mitochondrial carrier protein	78898.MVEG_11823T0	4.5e-158	563.9	Fungi incertae sedis	GO:0003674,GO:0005215,GO:0005310,GO:0005342,GO:0005575,GO:0005622,GO:0005623,GO:0005737,GO:0005739,GO:0005740,GO:0005743,GO:0006810,GO:0006811,GO:0006820,GO:0006835,GO:0006839,GO:0008150,GO:0008509,GO:0008514,GO:0015075,GO:0015139,GO:0015318,GO:0015711,GO:0015742,GO:0015849,GO:0016020,GO:0016021,GO:0019866,GO:0022857,GO:0031090,GO:0031224,GO:0031966,GO:0031967,GO:0031975,GO:0034220,GO:0043226,GO:…						ko00000,ko02000	2.A.29.2.4,2.A.29.2.5,2.A.29.2.8		iMM904.YPL134C,iND750.YPL134C	Fungi	1GRVC@112252,38CTW@33154,3NUWJ@4751,KOG0754@1,KOG0754@2759	NA|NA|NA	C	Mitochondrial carrier protein
MA-00139-95	YHM1		0.0075631	0.19852	DOWN	Mitochondrial carrier protein	78898.MVEG_10959T0	1.5e-172	612.1	Fungi incertae sedis	GO:0000002,GO:0001408,GO:0001409,GO:0003674,GO:0005215,GO:0005575,GO:0005622,GO:0005623,GO:0005737,GO:0005739,GO:0005740,GO:0005743,GO:0006810,GO:0006839,GO:0006862,GO:0006863,GO:0006873,GO:0006875,GO:0006879,GO:0006996,GO:0007005,GO:0008150,GO:0009987,GO:0015215,GO:0015216,GO:0015605,GO:0015748,GO:0015851,GO:0015854,GO:0015865,GO:0015931,GO:0015932,GO:0016020,GO:0016021,GO:0016043,GO:0019725,GO:…										Fungi	1GRZ5@112252,38DKN@33154,3NUAX@4751,KOG0750@1,KOG0750@2759	NA|NA|NA	C	Mitochondrial carrier protein
MA-00182-165		ko:K15100	0.00028332	0.071469	DOWN	Mitochondrial carrier protein	78898.MVEG_09472T0	2.3e-133	481.9	Fungi incertae sedis	GO:0003674,GO:0005215,GO:0005342,GO:0005371,GO:0005575,GO:0005622,GO:0005623,GO:0005737,GO:0005739,GO:0005740,GO:0005743,GO:0006810,GO:0006811,GO:0006820,GO:0006839,GO:0006842,GO:0006843,GO:0006855,GO:0008150,GO:0008509,GO:0008514,GO:0015075,GO:0015137,GO:0015142,GO:0015238,GO:0015291,GO:0015318,GO:0015711,GO:0015746,GO:0015849,GO:0015893,GO:0016020,GO:0016021,GO:0019866,GO:0022804,GO:0022857,GO:…						ko00000,ko02000	2.A.29.7			Fungi	1GT92@112252,38I0A@33154,3NUGK@4751,KOG0756@1,KOG0756@2759	NA|NA|NA	C	Mitochondrial carrier protein
MA-00190-33	MET13	ko:K00297	0.018966	0.38095	DOWN	Methylenetetrahydrofolate reductase	78898.MVEG_06071T0	0	1107	Fungi incertae sedis	GO:0000096,GO:0000097,GO:0003674,GO:0003824,GO:0004489,GO:0005575,GO:0005622,GO:0005623,GO:0005737,GO:0005739,GO:0005829,GO:0006082,GO:0006520,GO:0006555,GO:0006730,GO:0006790,GO:0006807,GO:0008150,GO:0008152,GO:0008652,GO:0009058,GO:0009066,GO:0009067,GO:0009086,GO:0009987,GO:0016053,GO:0016491,GO:0016645,GO:0016646,GO:0019752,GO:0043226,GO:0043227,GO:0043229,GO:0043231,GO:0043436,GO:0044237,GO:…	1.5.1.20	ko00670,ko00720,ko01100,ko01120,ko01200,ko01523,map00670,map00720,map01100,map01120,map01200,map01523	M00377	R01224,R07168	RC00081	ko00000,ko00001,ko00002,ko01000				Fungi	1GS9V@112252,38D0F@33154,3NWPE@4751,COG0685@1,KOG0564@2759	NA|NA|NA	E	Methylenetetrahydrofolate reductase
MA-00189-304	TOM20	ko:K17770	0.011066	0.24925	DOWN	MAS20 protein import receptor	78898.MVEG_00548T0	5.8e-176	624	Fungi incertae sedis	GO:0003674,GO:0005048,GO:0005215,GO:0005488,GO:0005575,GO:0005622,GO:0005623,GO:0005737,GO:0005739,GO:0005740,GO:0005741,GO:0005742,GO:0006403,GO:0006605,GO:0006626,GO:0006810,GO:0006839,GO:0006886,GO:0006996,GO:0007005,GO:0007006,GO:0007008,GO:0008104,GO:0008150,GO:0008320,GO:0008565,GO:0009987,GO:0015031,GO:0015399,GO:0015405,GO:0015450,GO:0015833,GO:0015931,GO:0016020,GO:0016021,GO:0016031,GO:…						ko00000,ko02000,ko03029	3.A.8.1			Fungi	1GRT3@112252,3A1HC@33154,3P2QG@4751,COG2940@1,KOG2084@2759,KOG4056@1,KOG4056@2759	NA|NA|NA	BU	MAS20 protein import receptor
MA-00072-185	LEU4	ko:K01649	0.013058	0.42389	DOWN	LeuA allosteric (dimerisation) domain	78898.MVEG_04840T0	4.3e-271	940.3	Fungi incertae sedis	GO:0003674,GO:0003824,GO:0003852,GO:0005488,GO:0005515,GO:0005575,GO:0005622,GO:0005623,GO:0005737,GO:0005739,GO:0006082,GO:0006520,GO:0006551,GO:0006807,GO:0008150,GO:0008152,GO:0008652,GO:0009058,GO:0009081,GO:0009082,GO:0009098,GO:0009987,GO:0016053,GO:0016740,GO:0016746,GO:0019752,GO:0043226,GO:0043227,GO:0043229,GO:0043231,GO:0043436,GO:0044237,GO:0044238,GO:0044249,GO:0044281,GO:0044283,GO:…	2.3.3.13	ko00290,ko00620,ko01100,ko01110,ko01210,ko01230,map00290,map00620,map01100,map01110,map01210,map01230	M00432	R01213	RC00004,RC00470,RC02754	br01601,ko00000,ko00001,ko00002,ko01000				Fungi	1GS43@112252,38SM6@33154,3NVRE@4751,COG0119@1,KOG2367@2759	NA|NA|NA	E	LeuA allosteric (dimerisation) domain
MA-00213-175	LYS12	ko:K05824	0.0043449	0.19712	DOWN	Isocitrate/isopropylmalate dehydrogenase	78898.MVEG_02912T0	8.7e-196	689.5	Fungi incertae sedis	GO:0003674,GO:0003824,GO:0005575,GO:0005622,GO:0005623,GO:0005737,GO:0005739,GO:0006082,GO:0006520,GO:0006553,GO:0006807,GO:0008150,GO:0008152,GO:0008652,GO:0009058,GO:0009066,GO:0009067,GO:0009085,GO:0009987,GO:0016053,GO:0016491,GO:0016614,GO:0016616,GO:0019752,GO:0043226,GO:0043227,GO:0043229,GO:0043231,GO:0043436,GO:0044237,GO:0044238,GO:0044249,GO:0044281,GO:0044283,GO:0044424,GO:0044444,GO:…	1.1.1.87	ko00300,ko01100,ko01120,ko01130,ko01210,ko01230,map00300,map01100,map01120,map01130,map01210,map01230	M00030,M00433	R01934,R01936,R04862	RC00084,RC00114,RC00626	br01601,ko00000,ko00001,ko00002,ko01000				Fungi	1GSS8@112252,38RHP@33154,3NWJP@4751,COG0473@1,KOG0785@2759	NA|NA|NA	E	Isocitrate/isopropylmalate dehydrogenase
MA-00320-17	ISA2	ko:K22072	0.018966	0.29268	DOWN	Iron-sulphur cluster biosynthesis	78898.MVEG_00307T0	1e-61	243.4	Fungi incertae sedis	GO:0003674,GO:0005488,GO:0005506,GO:0005575,GO:0005622,GO:0005623,GO:0005737,GO:0005739,GO:0005759,GO:0006082,GO:0006732,GO:0006766,GO:0006767,GO:0006768,GO:0006790,GO:0006807,GO:0008150,GO:0008152,GO:0009058,GO:0009102,GO:0009108,GO:0009110,GO:0009987,GO:0010467,GO:0016043,GO:0016053,GO:0016226,GO:0017144,GO:0018130,GO:0019538,GO:0019752,GO:0022607,GO:0031163,GO:0031974,GO:0032787,GO:0034641,GO:…						ko00000,ko03029				Fungi	1GXNR@112252,3A5SF@33154,3P4Q9@4751,COG0316@1,KOG1119@2759	NA|NA|NA	CU	Iron-sulphur cluster biosynthesis
MA-00297-34	LYS21	ko:K01655	0.0046538	0.0037627	DOWN	HMGL-like	78898.MVEG_08403T0	4.1e-234	817	Fungi incertae sedis	GO:0001207,GO:0003674,GO:0003824,GO:0004410,GO:0005575,GO:0005622,GO:0005623,GO:0005634,GO:0005737,GO:0005739,GO:0006082,GO:0006139,GO:0006259,GO:0006281,GO:0006325,GO:0006520,GO:0006553,GO:0006725,GO:0006807,GO:0006950,GO:0006974,GO:0006996,GO:0008150,GO:0008152,GO:0008652,GO:0009058,GO:0009066,GO:0009067,GO:0009085,GO:0009987,GO:0016043,GO:0016053,GO:0016740,GO:0016746,GO:0019752,GO:0019878,GO:…	2.3.3.14	ko00300,ko00620,ko01100,ko01120,ko01130,ko01210,ko01230,map00300,map00620,map01100,map01120,map01130,map01210,map01230	M00030,M00433	R00271	RC00004,RC00067,RC02754	br01601,ko00000,ko00001,ko00002,ko01000				Fungi	1GT60@112252,38E9U@33154,3NUMJ@4751,COG0119@1,KOG2367@2759	NA|NA|NA	E	HMGL-like
MA-00067-169	GLT1	ko:K00264	0.0043	0.030251	DOWN	GXGXG motif	78898.MVEG_10006T0	0	3939.8	Fungi incertae sedis	GO:0001505,GO:0003674,GO:0003824,GO:0005575,GO:0005622,GO:0005623,GO:0005737,GO:0005739,GO:0006082,GO:0006520,GO:0006536,GO:0006537,GO:0006541,GO:0006807,GO:0008150,GO:0008152,GO:0008652,GO:0009058,GO:0009064,GO:0009084,GO:0009987,GO:0015930,GO:0016040,GO:0016053,GO:0016491,GO:0016638,GO:0016639,GO:0017144,GO:0019676,GO:0019740,GO:0019752,GO:0030447,GO:0036267,GO:0040007,GO:0042133,GO:0043226,GO:…	1.4.1.13,1.4.1.14	ko00250,ko00910,ko01100,ko01110,ko01120,ko01130,ko01230,map00250,map00910,map01100,map01110,map01120,map01130,map01230		R00093,R00114,R00248	RC00006,RC00010,RC02799	ko00000,ko00001,ko01000				Fungi	1GSJX@112252,38E4E@33154,3NUMZ@4751,COG0069@1,KOG0399@2759	NA|NA|NA	E	GXGXG motif
MA-00210-45	AFG3	ko:K08956	0.011484	0.31903	DOWN	FtsH Extracellular	78898.MVEG_05334T0	0	1231.9	Fungi incertae sedis	GO:0000166,GO:0001302,GO:0002181,GO:0003674,GO:0003824,GO:0005488,GO:0005524,GO:0005575,GO:0005622,GO:0005623,GO:0005737,GO:0005739,GO:0005740,GO:0005743,GO:0005745,GO:0006412,GO:0006465,GO:0006508,GO:0006518,GO:0006605,GO:0006626,GO:0006807,GO:0006810,GO:0006839,GO:0006886,GO:0006996,GO:0007005,GO:0007568,GO:0007569,GO:0008104,GO:0008144,GO:0008150,GO:0008152,GO:0008233,GO:0008237,GO:0009058,GO:…						ko00000,ko01000,ko01002,ko03110				Fungi	1GT8Y@112252,38FRA@33154,3NV7Y@4751,COG0465@1,KOG0731@2759	NA|NA|NA	O	FtsH Extracellular
MA-00173-168	GUT1	ko:K00864	0.012465	0.40899	DOWN	FGGY family of carbohydrate kinases, N-terminal domain	78898.MVEG_11312T0	5.6e-246	856.7	Fungi incertae sedis	GO:0003674,GO:0003824,GO:0004370,GO:0005575,GO:0005622,GO:0005623,GO:0005737,GO:0005739,GO:0005975,GO:0006066,GO:0006071,GO:0006072,GO:0006629,GO:0006638,GO:0006639,GO:0006641,GO:0006793,GO:0006796,GO:0008150,GO:0008152,GO:0009058,GO:0009987,GO:0016301,GO:0016310,GO:0016740,GO:0016772,GO:0016773,GO:0019400,GO:0019637,GO:0019751,GO:0043226,GO:0043227,GO:0043229,GO:0043231,GO:0044237,GO:0044238,GO:…	2.7.1.30	ko00561,ko01100,ko03320,ko04626,map00561,map01100,map03320,map04626		R00847	RC00002,RC00017	ko00000,ko00001,ko01000,ko04147				Fungi	1GVE6@112252,38DGY@33154,3NUT5@4751,COG0554@1,KOG2517@2759	NA|NA|NA	G	FGGY family of carbohydrate kinases, N-terminal domain
MA-00213-573	AIP2	ko:K21618	0.011066	0.15533	DOWN	FAD linked oxidases, C-terminal domain	78898.MVEG_04967T0	2.5e-244	851.3	Fungi incertae sedis	GO:0000166,GO:0003674,GO:0003779,GO:0003824,GO:0004457,GO:0004458,GO:0005488,GO:0005515,GO:0005575,GO:0005622,GO:0005623,GO:0005737,GO:0005739,GO:0005759,GO:0006082,GO:0006089,GO:0006091,GO:0008092,GO:0008150,GO:0008152,GO:0009056,GO:0009987,GO:0015980,GO:0016054,GO:0016491,GO:0016614,GO:0016898,GO:0019516,GO:0019752,GO:0022900,GO:0022904,GO:0031974,GO:0032787,GO:0036094,GO:0043167,GO:0043168,GO:…	1.1.99.40	ko00620,map00620		R11593	RC00044	ko00000,ko00001,ko01000				Fungi	1GRRY@112252,38DBR@33154,3NUGN@4751,COG0277@1,KOG1232@2759	NA|NA|NA	C	FAD linked oxidases, C-terminal domain
MA-00111-84	TOM40	ko:K11518	0.011374	0.44377	DOWN	Eukaryotic porin	78898.MVEG_10542T0	3.9e-171	607.4	Fungi incertae sedis	GO:0003674,GO:0005215,GO:0005575,GO:0005622,GO:0005623,GO:0005737,GO:0005739,GO:0005740,GO:0005741,GO:0005742,GO:0006605,GO:0006626,GO:0006810,GO:0006839,GO:0006886,GO:0006996,GO:0007005,GO:0007006,GO:0007007,GO:0008104,GO:0008150,GO:0008320,GO:0008565,GO:0009987,GO:0015031,GO:0015399,GO:0015405,GO:0015450,GO:0015833,GO:0016020,GO:0016021,GO:0016043,GO:0017038,GO:0019867,GO:0022804,GO:0022857,GO:…		ko05014,map05014				ko00000,ko00001,ko02000,ko03029	3.A.8.1			Fungi	1GT54@112252,38FFD@33154,3NURF@4751,KOG3296@1,KOG3296@2759	NA|NA|NA	U	Eukaryotic porin
MA-00101-58	ETF1	ko:K03522	0.011484	0.25721	DOWN	Electron transfer flavoprotein domain	78898.MVEG_05543T0	2.2e-150	538.5	Fungi incertae sedis	GO:0000166,GO:0003674,GO:0003824,GO:0005488,GO:0005575,GO:0005622,GO:0005623,GO:0005737,GO:0005739,GO:0005759,GO:0006082,GO:0006091,GO:0006629,GO:0006631,GO:0006635,GO:0008150,GO:0008152,GO:0009055,GO:0009056,GO:0009062,GO:0009987,GO:0015980,GO:0016042,GO:0016054,GO:0016491,GO:0019395,GO:0019752,GO:0022900,GO:0022904,GO:0030258,GO:0031974,GO:0032787,GO:0033539,GO:0034440,GO:0036094,GO:0043167,GO:…						ko00000,ko04147				Fungi	1GSZ6@112252,38C7G@33154,3NVHF@4751,COG2025@1,KOG3954@2759	NA|NA|NA	C	Electron transfer flavoprotein domain
MA-00184-106	CYC1	ko:K08738	0.0043975	0.45584	DOWN	Electron carrier protein. The oxidized form of the cytochrome c heme group can accept an electron from the heme group of the cytochrome c1 subunit of cytochrome reductase. Cytochrome c then transfers this electron to the cytochrome oxidase complex, the final protein carrier in the mitochondrial electron-transport chain	78898.MVEG_09324T0	7.7e-49	199.5	Fungi incertae sedis	GO:0003674,GO:0003824,GO:0005575,GO:0005622,GO:0005623,GO:0005737,GO:0005739,GO:0005740,GO:0005743,GO:0005746,GO:0005758,GO:0006091,GO:0006119,GO:0006122,GO:0006123,GO:0006139,GO:0006163,GO:0006725,GO:0006753,GO:0006793,GO:0006796,GO:0006807,GO:0008150,GO:0008152,GO:0009055,GO:0009060,GO:0009117,GO:0009123,GO:0009126,GO:0009141,GO:0009144,GO:0009150,GO:0009161,GO:0009167,GO:0009199,GO:0009205,GO:…		ko00920,ko01100,ko01120,ko01524,ko02020,ko04115,ko04210,ko04214,ko04215,ko04932,ko05010,ko05012,ko05014,ko05016,ko05134,ko05145,ko05152,ko05161,ko05164,ko05167,ko05168,ko05200,ko05210,ko05222,ko05416,map00920,map01100,map01120,map01524,map02020,map04115,map04210,map04214,map04215,map04932,map05010,map05012,map05014,map05016,map05134,map05145,map05152,map05161,map05164,map05167,map05168,map05200,m…	M00595	R10151	RC03151,RC03152	ko00000,ko00001,ko00002	3.D.4.6		iMM904.YJR048W	Fungi	1GTZ4@112252,3A3GP@33154,3P3WW@4751,COG3474@1,KOG3453@2759	NA|NA|NA	C	Electron carrier protein. The oxidized form of the cytochrome c heme group can accept an electron from the heme group of the cytochrome c1 subunit of cytochrome reductase. Cytochrome c then transfers this electron to the cytochrome oxidase complex, the final protein carrier in the mitochondrial electron-transport chain
MA-00072-80	MRPL3	ko:K17425	0.033849	0.11018	DOWN	Double-stranded RNA binding motif	78898.MVEG_10501T0	9.6e-130	469.9	Fungi incertae sedis	GO:0000313,GO:0000315,GO:0003674,GO:0003676,GO:0003723,GO:0003725,GO:0003735,GO:0003824,GO:0004518,GO:0004519,GO:0004521,GO:0004525,GO:0004540,GO:0005198,GO:0005488,GO:0005575,GO:0005622,GO:0005623,GO:0005737,GO:0005739,GO:0005759,GO:0005761,GO:0005762,GO:0005840,GO:0006139,GO:0006396,GO:0006412,GO:0006518,GO:0006725,GO:0006807,GO:0008150,GO:0008152,GO:0009058,GO:0009059,GO:0009987,GO:0010467,GO:…						br01610,ko00000,ko01000,ko03011				Fungi	1GTM1@112252,38FEN@33154,3NW2P@4751,COG0571@1,KOG3769@2759	NA|NA|NA	J	Double-stranded RNA binding motif
MA-00270-163	YDL086W	ko:K01061	0.026564	0.46717	DOWN	dienelactone hydrolase	78898.MVEG_07732T0	6e-146	523.5	Fungi	GO:0003674,GO:0003824,GO:0005575,GO:0005622,GO:0005623,GO:0005737,GO:0005739,GO:0008806,GO:0016787,GO:0016788,GO:0043226,GO:0043227,GO:0043229,GO:0043231,GO:0044424,GO:0044444,GO:0044464,GO:0052689	3.1.1.45	ko00361,ko00364,ko00623,ko01100,ko01110,ko01120,ko01130,map00361,map00364,map00623,map01100,map01110,map01120,map01130		R03893,R05510,R05511,R06835,R06838,R08120,R08121,R09136,R09220,R09222	RC01018,RC01906,RC01907,RC02441,RC02467,RC02468,RC02674,RC02675,RC02686	ko00000,ko00001,ko01000				Fungi	2QQFN@2759,38ESF@33154,3NV2Z@4751,COG0412@1	NA|NA|NA	Q	dienelactone hydrolase
MA-00090-434	ILV3	ko:K01687	0.01837	0.44447	DOWN	Dehydratase family	78898.MVEG_02603T0	0	1093.6	Fungi incertae sedis	GO:0003674,GO:0003824,GO:0004160,GO:0005575,GO:0005622,GO:0005623,GO:0005737,GO:0005739,GO:0006082,GO:0006520,GO:0006549,GO:0006551,GO:0006573,GO:0006807,GO:0008150,GO:0008152,GO:0008652,GO:0009058,GO:0009081,GO:0009082,GO:0009097,GO:0009099,GO:0009987,GO:0016053,GO:0016829,GO:0016835,GO:0016836,GO:0019752,GO:0043226,GO:0043227,GO:0043229,GO:0043231,GO:0043436,GO:0044237,GO:0044238,GO:0044249,GO:…	4.2.1.9	ko00290,ko00770,ko01100,ko01110,ko01130,ko01210,ko01230,map00290,map00770,map01100,map01110,map01130,map01210,map01230	M00019,M00570	R01209,R04441,R05070	RC00468,RC01714	ko00000,ko00001,ko00002,ko01000				Fungi	1GS3V@112252,38F28@33154,3NUBR@4751,COG0129@1,KOG2448@2759	NA|NA|NA	E	Dehydratase family
MA-00189-290	COX6A	ko:K02266	0.0017221	0.21555	DOWN	Cytochrome c oxidase subunit VIa	78898.MVEG_00505T0	2.1e-25	121.7	Fungi incertae sedis	GO:0003674,GO:0005575,GO:0005622,GO:0005623,GO:0005737,GO:0005739,GO:0005740,GO:0005743,GO:0005746,GO:0005751,GO:0006091,GO:0006119,GO:0006123,GO:0006139,GO:0006163,GO:0006725,GO:0006753,GO:0006793,GO:0006796,GO:0006807,GO:0006996,GO:0007005,GO:0008150,GO:0008152,GO:0009060,GO:0009117,GO:0009123,GO:0009126,GO:0009141,GO:0009144,GO:0009150,GO:0009161,GO:0009167,GO:0009199,GO:0009205,GO:0009259,GO:…		ko00190,ko01100,ko04260,ko04714,ko04932,ko05010,ko05012,ko05016,map00190,map01100,map04260,map04714,map04932,map05010,map05012,map05016	M00154			ko00000,ko00001,ko00002	3.D.4.11,3.D.4.8			Fungi	1GUD0@112252,3A3WN@33154,3P7D2@4751,KOG3469@1,KOG3469@2759	NA|NA|NA	C	Cytochrome c oxidase subunit VIa
MA-00334-30	COX4	ko:K02265	0.030089	0.37212	DOWN	Cytochrome c oxidase subunit Vb	78898.MVEG_04993T0	1.4e-60	238.8	Fungi incertae sedis	GO:0003674,GO:0005488,GO:0005575,GO:0005622,GO:0005623,GO:0005737,GO:0005739,GO:0005740,GO:0005743,GO:0005746,GO:0005751,GO:0006091,GO:0006119,GO:0006123,GO:0006139,GO:0006163,GO:0006164,GO:0006725,GO:0006753,GO:0006754,GO:0006793,GO:0006796,GO:0006807,GO:0006810,GO:0006811,GO:0006812,GO:0006839,GO:0008150,GO:0008152,GO:0008270,GO:0009058,GO:0009060,GO:0009117,GO:0009123,GO:0009124,GO:0009126,GO:…		ko00190,ko01100,ko04260,ko04714,ko04932,ko05010,ko05012,ko05016,map00190,map01100,map04260,map04714,map04932,map05010,map05012,map05016	M00154			ko00000,ko00001,ko00002	3.D.4.11,3.D.4.8			Fungi	1GUAF@112252,3A6JQ@33154,3P5BA@4751,KOG3352@1,KOG3352@2759	NA|NA|NA	C	Cytochrome c oxidase subunit Vb
MA-00072-9	cox5	ko:K02263	0.0049162	0.24642	DOWN	Cytochrome c oxidase subunit IV	78898.MVEG_02760T0	6e-64	250.4	Fungi incertae sedis	GO:0003674,GO:0003824,GO:0004129,GO:0005215,GO:0005575,GO:0005622,GO:0005623,GO:0005737,GO:0005739,GO:0005740,GO:0005743,GO:0005746,GO:0005751,GO:0006091,GO:0006119,GO:0006123,GO:0006139,GO:0006163,GO:0006725,GO:0006753,GO:0006793,GO:0006796,GO:0006807,GO:0006810,GO:0006811,GO:0006812,GO:0008150,GO:0008152,GO:0008324,GO:0009055,GO:0009060,GO:0009117,GO:0009123,GO:0009126,GO:0009141,GO:0009144,GO:…		ko00190,ko01100,ko04260,ko04714,ko04932,ko05010,ko05012,ko05016,map00190,map01100,map04260,map04714,map04932,map05010,map05012,map05016	M00154			ko00000,ko00001,ko00002	3.D.4.11,3.D.4.8		iMM904.YNL052W,iND750.YNL052W	Fungi	1GTWU@112252,3A1S5@33154,3P5Q4@4751,KOG4075@1,KOG4075@2759	NA|NA|NA	C	Cytochrome c oxidase subunit IV
MA-00120-121	COX12	ko:K02267	0.037105	0.47202	DOWN	Cytochrome c oxidase subunit	78898.MVEG_08752T0	9.5e-32	142.5	Fungi incertae sedis	GO:0005575,GO:0005622,GO:0005623,GO:0005737,GO:0005739,GO:0005740,GO:0005743,GO:0005746,GO:0005751,GO:0005758,GO:0006996,GO:0007005,GO:0008150,GO:0008535,GO:0009987,GO:0016020,GO:0016021,GO:0016043,GO:0017004,GO:0019866,GO:0022607,GO:0031090,GO:0031224,GO:0031966,GO:0031967,GO:0031970,GO:0031974,GO:0031975,GO:0032991,GO:0033108,GO:0033617,GO:0034622,GO:0043226,GO:0043227,GO:0043229,GO:0043231,GO:…		ko00190,ko01100,ko04260,ko04714,ko04932,ko05010,ko05012,ko05016,map00190,map01100,map04260,map04714,map04932,map05010,map05012,map05016	M00154			ko00000,ko00001,ko00002	3.D.4.11,3.D.4.8			Fungi	1GUD3@112252,3A5X8@33154,3P5BS@4751,KOG3057@1,KOG3057@2759	NA|NA|NA	C	Cytochrome c oxidase subunit
MA-00118-5	NDH51	ko:K03942	0.01837	0.41912	DOWN	Core subunit of the mitochondrial membrane respiratory chain NADH dehydrogenase (Complex I) that is believed to belong to the minimal assembly required for catalysis. Complex I functions in the transfer of electrons from NADH to the respiratory chain	78898.MVEG_02284T0	7.3e-264	916	Fungi incertae sedis	GO:0005575,GO:0005622,GO:0005623,GO:0005737,GO:0005739,GO:0005740,GO:0005743,GO:0016020,GO:0019866,GO:0031090,GO:0031966,GO:0031967,GO:0031975,GO:0043226,GO:0043227,GO:0043229,GO:0043231,GO:0044422,GO:0044424,GO:0044429,GO:0044444,GO:0044446,GO:0044464	1.6.5.3,1.6.99.3	ko00190,ko01100,ko04714,ko04723,ko04932,ko05010,ko05012,ko05016,map00190,map01100,map04714,map04723,map04932,map05010,map05012,map05016	M00143	R11945	RC00061	ko00000,ko00001,ko00002,ko01000	3.D.1.6			Fungi	1GT1J@112252,38DDI@33154,3NU1K@4751,COG1894@1,KOG2658@2759	NA|NA|NA	C	Core subunit of the mitochondrial membrane respiratory chain NADH dehydrogenase (Complex I) that is believed to belong to the minimal assembly required for catalysis. Complex I functions in the transfer of electrons from NADH to the respiratory chain
MA-00323-195	QCR7	ko:K00417	0.030187	0.49687	DOWN	Component of the ubiquinol-cytochrome c reductase complex (complex III or cytochrome b-c1 complex), which is part of the mitochondrial respiratory chain	78898.MVEG_11995T0	1.1e-54	219.2	Fungi incertae sedis	GO:0005575,GO:0005622,GO:0005623,GO:0005737,GO:0005739,GO:0005740,GO:0005743,GO:0005746,GO:0005750,GO:0006091,GO:0006119,GO:0006122,GO:0006139,GO:0006163,GO:0006725,GO:0006753,GO:0006793,GO:0006796,GO:0006807,GO:0006996,GO:0007005,GO:0008150,GO:0008152,GO:0009060,GO:0009117,GO:0009123,GO:0009126,GO:0009141,GO:0009144,GO:0009150,GO:0009161,GO:0009167,GO:0009199,GO:0009205,GO:0009259,GO:0009987,GO:…		ko00190,ko01100,ko04260,ko04714,ko04932,ko05010,ko05012,ko05016,map00190,map01100,map04260,map04714,map04932,map05010,map05012,map05016	M00152			ko00000,ko00001,ko00002				Fungi	1GUQV@112252,3A4MP@33154,3P446@4751,KOG3440@1,KOG3440@2759	NA|NA|NA	C	Component of the ubiquinol-cytochrome c reductase complex (complex III or cytochrome b-c1 complex), which is part of the mitochondrial respiratory chain
MA-00184-175	RIP1	ko:K00411	0.011735	0.17133	DOWN	Component of the ubiquinol-cytochrome c reductase complex (complex III or cytochrome b-c1 complex), which is a respiratory chain that generates an electrochemical potential coupled to ATP synthesis	78898.MVEG_07405T0	4.6e-107	394	Fungi incertae sedis	GO:0005575,GO:0005622,GO:0005623,GO:0005737,GO:0005739,GO:0005740,GO:0005743,GO:0005746,GO:0005750,GO:0006091,GO:0006119,GO:0006122,GO:0006139,GO:0006163,GO:0006725,GO:0006753,GO:0006793,GO:0006796,GO:0006807,GO:0008150,GO:0008152,GO:0009060,GO:0009117,GO:0009123,GO:0009126,GO:0009141,GO:0009144,GO:0009150,GO:0009161,GO:0009167,GO:0009199,GO:0009205,GO:0009259,GO:0009987,GO:0015980,GO:0016020,GO:…	1.10.2.2	ko00190,ko01100,ko02020,ko04260,ko04714,ko04932,ko05010,ko05012,ko05016,map00190,map01100,map02020,map04260,map04714,map04932,map05010,map05012,map05016	M00151,M00152			ko00000,ko00001,ko00002,ko01000				Fungi	1GSJR@112252,38FY0@33154,3NV7A@4751,COG0723@1,KOG1671@2759	NA|NA|NA	C	Component of the ubiquinol-cytochrome c reductase complex (complex III or cytochrome b-c1 complex), which is a respiratory chain that generates an electrochemical potential coupled to ATP synthesis
MA-00139-331	LYS4	ko:K01705	0.0035733	0.23021	DOWN	Catalyzes the reversible hydration of cis-homoaconitate to (2R,3S)-homoisocitrate, a step in the alpha-aminoadipate pathway for lysine biosynthesis	78898.MVEG_04402T0	0	1173.3	Fungi incertae sedis	GO:0003674,GO:0003824,GO:0004409,GO:0005575,GO:0005622,GO:0005623,GO:0005737,GO:0005739,GO:0006082,GO:0006520,GO:0006536,GO:0006553,GO:0006807,GO:0006873,GO:0006875,GO:0006879,GO:0006950,GO:0007154,GO:0008150,GO:0008152,GO:0008652,GO:0009058,GO:0009064,GO:0009066,GO:0009067,GO:0009085,GO:0009267,GO:0009605,GO:0009987,GO:0009991,GO:0010106,GO:0016053,GO:0016829,GO:0016835,GO:0016836,GO:0019725,GO:…	4.2.1.36	ko00300,ko01100,ko01120,ko01130,ko01210,ko01230,map00300,map01100,map01120,map01130,map01210,map01230	M00030,M00433	R04371	RC00618	br01601,ko00000,ko00001,ko00002,ko01000				Fungi	1GSUA@112252,38FZD@33154,3NUC6@4751,COG1048@1,KOG0453@2759	NA|NA|NA	E	Catalyzes the reversible hydration of cis-homoaconitate to (2R,3S)-homoisocitrate, a step in the alpha-aminoadipate pathway for lysine biosynthesis
MA-00101-248	MET3	ko:K00958	0.0046538	0.006999	DOWN	Catalyzes the first intracellular reaction of sulfate assimilation, forming adenosine-5'-phosphosulfate (APS) from inorganic sulfate and ATP. Plays an important role in sulfate activation as a component of the biosynthesis pathway of sulfur- containing amino acids	78898.MVEG_09090T0	2.9e-307	1060.4	Fungi incertae sedis	GO:0000096,GO:0000103,GO:0003674,GO:0003824,GO:0004779,GO:0004781,GO:0005575,GO:0005622,GO:0005623,GO:0005737,GO:0005739,GO:0006082,GO:0006520,GO:0006790,GO:0006807,GO:0008150,GO:0008152,GO:0009987,GO:0010134,GO:0016740,GO:0016772,GO:0016779,GO:0019379,GO:0019419,GO:0019752,GO:0043226,GO:0043227,GO:0043229,GO:0043231,GO:0043436,GO:0044237,GO:0044238,GO:0044281,GO:0044424,GO:0044444,GO:0044464,GO:…	2.7.7.4	ko00230,ko00261,ko00450,ko00920,ko01100,ko01120,ko01130,map00230,map00261,map00450,map00920,map01100,map01120,map01130	M00176,M00596	R00529,R04929	RC02809,RC02889	ko00000,ko00001,ko00002,ko01000				Fungi	1GT3B@112252,38EMA@33154,3NUAT@4751,COG2046@1,KOG0636@2759	NA|NA|NA	P	Catalyzes the first intracellular reaction of sulfate assimilation, forming adenosine-5'-phosphosulfate (APS) from inorganic sulfate and ATP. Plays an important role in sulfate activation as a component of the biosynthesis pathway of sulfur- containing amino acids
MA-00213-188	HEM14	ko:K00231	0.03205	0.25721	DOWN	Catalyzes the 6-electron oxidation of protoporphyrinogen-IX to form protoporphyrin-IX	78898.MVEG_03000T0	3.7e-224	784.3	Fungi incertae sedis	GO:0003674,GO:0003824,GO:0004729,GO:0005575,GO:0005622,GO:0005623,GO:0005737,GO:0005739,GO:0005740,GO:0005743,GO:0006725,GO:0006778,GO:0006779,GO:0006783,GO:0006807,GO:0008150,GO:0008152,GO:0009058,GO:0009987,GO:0016020,GO:0016491,GO:0016627,GO:0016634,GO:0018130,GO:0019438,GO:0019866,GO:0031090,GO:0031966,GO:0031967,GO:0031975,GO:0033013,GO:0033014,GO:0034641,GO:0042168,GO:0042440,GO:0043226,GO:…	1.3.3.15,1.3.3.4	ko00860,ko01100,ko01110,map00860,map01100,map01110	M00121	R03222,R04178	RC00885	ko00000,ko00001,ko00002,ko01000				Fungi	1GS9J@112252,38FMJ@33154,3NXXR@4751,COG1232@1,KOG1276@2759	NA|NA|NA	H	Catalyzes the 6-electron oxidation of protoporphyrinogen-IX to form protoporphyrin-IX
MA-00112-345	CPA1	ko:K01956	0.0020343	0.0092608	DOWN	Carbamoyl-phosphate synthase small chain, CPSase domain	78898.MVEG_05680T0	7.5e-229	799.7	Fungi incertae sedis	GO:0000050,GO:0003674,GO:0003824,GO:0004088,GO:0005575,GO:0005622,GO:0005623,GO:0005737,GO:0005739,GO:0005759,GO:0005951,GO:0006082,GO:0006520,GO:0006525,GO:0006526,GO:0006807,GO:0008150,GO:0008152,GO:0008652,GO:0009058,GO:0009064,GO:0009084,GO:0009987,GO:0010494,GO:0016053,GO:0016874,GO:0016879,GO:0016884,GO:0019627,GO:0019752,GO:0031974,GO:0032991,GO:0034641,GO:0035770,GO:0036464,GO:0043226,GO:…	6.3.5.5	ko00240,ko00250,ko01100,map00240,map00250,map01100	M00051	R00256,R00575,R01395,R10948,R10949	RC00002,RC00010,RC00043,RC02750,RC02798,RC03314	ko00000,ko00001,ko00002,ko01000				Fungi	1GSUQ@112252,39G35@33154,3NTYM@4751,COG0458@1,KOG0370@2759	NA|NA|NA	EF	Carbamoyl-phosphate synthase small chain, CPSase domain
MA-00120-195	RPS18	ko:K02964	0.036042	0.38241	DOWN	Belongs to the universal ribosomal protein uS13 family	78898.MVEG_02726T0	1.3e-63	248.8	Fungi	GO:0000447,GO:0000460,GO:0000462,GO:0000466,GO:0000469,GO:0000478,GO:0000479,GO:0002181,GO:0003674,GO:0003735,GO:0005198,GO:0005575,GO:0005622,GO:0005623,GO:0005737,GO:0005739,GO:0005829,GO:0005840,GO:0006139,GO:0006364,GO:0006396,GO:0006403,GO:0006405,GO:0006407,GO:0006412,GO:0006518,GO:0006611,GO:0006725,GO:0006807,GO:0006810,GO:0006886,GO:0006913,GO:0008104,GO:0008150,GO:0008152,GO:0009058,GO:…		ko03010,map03010	M00177			br01610,ko00000,ko00001,ko00002,ko03011				Fungi	39ZZ4@33154,3P2B2@4751,COG0099@1,KOG3311@2759	NA|NA|NA	J	Belongs to the universal ribosomal protein uS13 family
MA-00297-491	IDP1	ko:K00031	0.013058	0.31019	DOWN	Belongs to the isocitrate and isopropylmalate dehydrogenases family	78898.MVEG_03783T0	2.1e-216	758.1	Fungi	GO:0003674,GO:0003824,GO:0004448,GO:0004450,GO:0005575,GO:0005622,GO:0005623,GO:0005737,GO:0005739,GO:0005759,GO:0005777,GO:0005829,GO:0006082,GO:0006091,GO:0006099,GO:0006101,GO:0006102,GO:0006139,GO:0006520,GO:0006536,GO:0006537,GO:0006629,GO:0006631,GO:0006635,GO:0006725,GO:0006732,GO:0006733,GO:0006739,GO:0006740,GO:0006753,GO:0006793,GO:0006796,GO:0006807,GO:0008150,GO:0008152,GO:0008652,GO:…	1.1.1.42	ko00020,ko00480,ko00720,ko01100,ko01110,ko01120,ko01130,ko01200,ko01210,ko01230,ko04146,map00020,map00480,map00720,map01100,map01110,map01120,map01130,map01200,map01210,map01230,map04146	M00009,M00010,M00173,M00740	R00267,R00268,R01899	RC00001,RC00084,RC00114,RC00626,RC02801	br01601,ko00000,ko00001,ko00002,ko01000			iMM904.YLR174W,iND750.YLR174W	Fungi	38CG3@33154,3NVZ4@4751,COG0538@1,KOG1526@2759	NA|NA|NA	C	Belongs to the isocitrate and isopropylmalate dehydrogenases family
MA-00270-95	ATP5	ko:K02137	0.0065344	0.49253	DOWN	ATP synthase delta (OSCP) subunit	78898.MVEG_00619T0	6.7e-88	330.1	Fungi incertae sedis	GO:0000274,GO:0000276,GO:0003674,GO:0005198,GO:0005575,GO:0005622,GO:0005623,GO:0005737,GO:0005739,GO:0005740,GO:0005743,GO:0005753,GO:0006091,GO:0006119,GO:0006139,GO:0006163,GO:0006164,GO:0006725,GO:0006753,GO:0006754,GO:0006793,GO:0006796,GO:0006807,GO:0006810,GO:0006811,GO:0006812,GO:0006839,GO:0008150,GO:0008152,GO:0009058,GO:0009117,GO:0009123,GO:0009124,GO:0009126,GO:0009127,GO:0009141,GO:…		ko00190,ko01100,ko04714,ko05010,ko05012,ko05016,map00190,map01100,map04714,map05010,map05012,map05016	M00158			ko00000,ko00001,ko00002	3.A.2.1			Fungi	1GTMH@112252,39SAW@33154,3NXBK@4751,COG0712@1,KOG1662@2759	NA|NA|NA	C	ATP synthase delta (OSCP) subunit
MA-00297-74	ATP3	ko:K02136	0.019886	0.4639	DOWN	ATP synthase	78898.MVEG_02423T0	1.6e-99	369.4	Fungi incertae sedis	GO:0000275,GO:0005575,GO:0005622,GO:0005623,GO:0005737,GO:0005739,GO:0005740,GO:0005743,GO:0005753,GO:0005756,GO:0006091,GO:0006119,GO:0006139,GO:0006163,GO:0006164,GO:0006725,GO:0006753,GO:0006754,GO:0006793,GO:0006796,GO:0006807,GO:0006810,GO:0006811,GO:0006812,GO:0006839,GO:0008150,GO:0008152,GO:0009058,GO:0009117,GO:0009123,GO:0009124,GO:0009126,GO:0009127,GO:0009141,GO:0009142,GO:0009144,GO:…		ko00190,ko01100,ko04714,ko05010,ko05012,ko05016,map00190,map01100,map04714,map05010,map05012,map05016	M00158			ko00000,ko00001,ko00002	3.A.2.1			Fungi	1GSXF@112252,38C4S@33154,3NYDF@4751,COG0224@1,KOG1531@2759	NA|NA|NA	C	ATP synthase
MA-00320-156	PRS	ko:K01881	0.02858	0.33392	DOWN	Anticodon binding domain	78898.MVEG_00345T0	2.8e-268	931	Fungi incertae sedis	GO:0003674,GO:0003824,GO:0004812,GO:0004827,GO:0005575,GO:0005622,GO:0005623,GO:0005737,GO:0005739,GO:0006082,GO:0006139,GO:0006399,GO:0006412,GO:0006418,GO:0006433,GO:0006518,GO:0006520,GO:0006725,GO:0006807,GO:0008150,GO:0008152,GO:0009058,GO:0009059,GO:0009987,GO:0010467,GO:0016070,GO:0016874,GO:0016875,GO:0019538,GO:0019752,GO:0032543,GO:0034641,GO:0034645,GO:0034660,GO:0043038,GO:0043039,GO:…	6.1.1.15	ko00970,map00970	M00359,M00360	R03661	RC00055,RC00523	ko00000,ko00001,ko00002,ko01000,ko01007,ko03016				Fungi	1GTDT@112252,38HAU@33154,3NU59@4751,COG0442@1,KOG2324@2759	NA|NA|NA	J	Anticodon binding domain
MA-00139-252	ACS1	ko:K01895	0.0049606	0.26391	DOWN	AMP-binding enzyme C-terminal domain	78898.MVEG_04665T0	0	1257.7	Fungi incertae sedis	GO:0000166,GO:0001302,GO:0003674,GO:0003824,GO:0003987,GO:0005488,GO:0005575,GO:0005576,GO:0005622,GO:0005623,GO:0005634,GO:0005730,GO:0005737,GO:0005739,GO:0005829,GO:0006082,GO:0006083,GO:0006084,GO:0006085,GO:0006091,GO:0006113,GO:0006139,GO:0006163,GO:0006164,GO:0006325,GO:0006464,GO:0006473,GO:0006475,GO:0006637,GO:0006725,GO:0006732,GO:0006753,GO:0006790,GO:0006793,GO:0006796,GO:0006807,GO:…	6.2.1.1	ko00010,ko00620,ko00640,ko00680,ko00720,ko01100,ko01110,ko01120,ko01130,ko01200,map00010,map00620,map00640,map00680,map00720,map01100,map01110,map01120,map01130,map01200	M00357	R00235,R00236,R00316,R00926,R01354	RC00004,RC00012,RC00043,RC00070,RC02746,RC02816	ko00000,ko00001,ko00002,ko01000,ko01004				Fungi	1GVSG@112252,38BR4@33154,3NUTI@4751,COG0365@1,KOG1175@2759	NA|NA|NA	I	AMP-binding enzyme C-terminal domain
MA-00101-261	ACS1	ko:K01895	0.006173	0.19157	DOWN	AMP-binding enzyme C-terminal domain	78898.MVEG_04526T0	0	1185.2	Fungi incertae sedis	GO:0000166,GO:0001302,GO:0003674,GO:0003824,GO:0003987,GO:0005488,GO:0005575,GO:0005576,GO:0005622,GO:0005623,GO:0005634,GO:0005730,GO:0005737,GO:0005739,GO:0005829,GO:0006082,GO:0006083,GO:0006084,GO:0006085,GO:0006091,GO:0006113,GO:0006139,GO:0006163,GO:0006164,GO:0006325,GO:0006464,GO:0006473,GO:0006475,GO:0006637,GO:0006725,GO:0006732,GO:0006753,GO:0006790,GO:0006793,GO:0006796,GO:0006807,GO:…	6.2.1.1	ko00010,ko00620,ko00640,ko00680,ko00720,ko01100,ko01110,ko01120,ko01130,ko01200,map00010,map00620,map00640,map00680,map00720,map01100,map01110,map01120,map01130,map01200	M00357	R00235,R00236,R00316,R00926,R01354	RC00004,RC00012,RC00043,RC00070,RC02746,RC02816	ko00000,ko00001,ko00002,ko01000,ko01004				Fungi	1GVSG@112252,38BR4@33154,3NUTI@4751,COG0365@1,KOG1175@2759	NA|NA|NA	I	AMP-binding enzyme C-terminal domain
MA-00055-99	ARG8	ko:K00818	0.0075631	0.27386	DOWN	Aminotransferase class-III	78898.MVEG_10897T0	2.9e-225	787.7	Fungi incertae sedis	GO:0003008,GO:0003674,GO:0003824,GO:0003992,GO:0004587,GO:0005488,GO:0005515,GO:0005575,GO:0005622,GO:0005623,GO:0005634,GO:0005654,GO:0005737,GO:0005739,GO:0005759,GO:0006082,GO:0006520,GO:0006525,GO:0006526,GO:0006536,GO:0006538,GO:0006591,GO:0006592,GO:0006807,GO:0007600,GO:0007601,GO:0008144,GO:0008150,GO:0008152,GO:0008483,GO:0008652,GO:0009056,GO:0009058,GO:0009063,GO:0009064,GO:0009065,GO:…	2.6.1.11	ko00220,ko01100,ko01110,ko01130,ko01210,ko01230,map00220,map01100,map01110,map01130,map01210,map01230	M00028	R02283	RC00006,RC00062	ko00000,ko00001,ko00002,ko01000,ko01007				Fungi	1GT0B@112252,39D80@33154,3NUU1@4751,COG4992@1,KOG1401@2759	NA|NA|NA	E	Aminotransferase class-III
MA-00073-281	BNA3	ko:K14264	0.0074038	0.316	DOWN	Aminotransferase class I and II	78898.MVEG_05427T0	3.3e-228	797.3	Fungi incertae sedis	GO:0003674,GO:0003824,GO:0005575,GO:0005622,GO:0005623,GO:0005737,GO:0005739,GO:0006082,GO:0006520,GO:0006725,GO:0006807,GO:0008150,GO:0008152,GO:0008483,GO:0009058,GO:0009987,GO:0016053,GO:0016212,GO:0016740,GO:0016769,GO:0017144,GO:0018130,GO:0019438,GO:0019752,GO:0032787,GO:0034275,GO:0034276,GO:0036137,GO:0042180,GO:0042537,GO:0043226,GO:0043227,GO:0043229,GO:0043231,GO:0043436,GO:0044237,GO:…	2.6.1.7	ko00380,ko01100,map00380,map01100		R01956,R04171	RC00006	ko00000,ko00001,ko01000,ko01007			iMM904.YJL060W	Fungi	1GRU8@112252,38BZ0@33154,3NVUU@4751,COG0436@1,KOG0257@2759	NA|NA|NA	E	Aminotransferase class I and II
MA-00162-399	ALT1	ko:K00814	0.0067676	0.16633	DOWN	Aminotransferase class I and II	78898.MVEG_07784T0	7e-254	882.9	Fungi incertae sedis	GO:0001300,GO:0001505,GO:0003674,GO:0003824,GO:0004021,GO:0005575,GO:0005622,GO:0005623,GO:0005634,GO:0005737,GO:0005739,GO:0006082,GO:0006520,GO:0006522,GO:0006523,GO:0006524,GO:0006536,GO:0006537,GO:0006807,GO:0007568,GO:0007569,GO:0008150,GO:0008152,GO:0008483,GO:0008652,GO:0009056,GO:0009058,GO:0009063,GO:0009064,GO:0009078,GO:0009079,GO:0009080,GO:0009084,GO:0009987,GO:0016053,GO:0016054,GO:…	2.6.1.2	ko00220,ko00250,ko00710,ko01100,ko01120,ko01200,ko01210,ko01230,map00220,map00250,map00710,map01100,map01120,map01200,map01210,map01230	M00171	R00258	RC00006,RC00008	ko00000,ko00001,ko00002,ko01000,ko01007				Fungi	1GT5I@112252,38H3G@33154,3NU5I@4751,COG0436@1,KOG0258@2759	NA|NA|NA	E	Aminotransferase class I and II
MA-00120-95	PUT2	ko:K00294	0.01837	0.46468	DOWN	Aldehyde dehydrogenase family	78898.MVEG_08707T0	0	1068.1	Fungi incertae sedis	GO:0003674,GO:0003824,GO:0003842,GO:0005575,GO:0005622,GO:0005623,GO:0005737,GO:0005739,GO:0005759,GO:0006082,GO:0006520,GO:0006536,GO:0006537,GO:0006560,GO:0006562,GO:0006807,GO:0006950,GO:0007154,GO:0008150,GO:0008152,GO:0008652,GO:0009056,GO:0009058,GO:0009063,GO:0009064,GO:0009065,GO:0009084,GO:0009267,GO:0009605,GO:0009987,GO:0009991,GO:0010133,GO:0016053,GO:0016054,GO:0016491,GO:0016645,GO:…	1.2.1.88	ko00250,ko00330,ko01100,map00250,map00330,map01100		R00245,R00707,R00708,R04444,R04445,R05051	RC00080,RC00216,RC00242,RC00255	ko00000,ko00001,ko01000				Fungi	1GS2M@112252,38D6T@33154,3NWNB@4751,COG1012@1,KOG2455@2759	NA|NA|NA	E	Aldehyde dehydrogenase family
MA-00154-3	ACP1	ko:K03955	0.0075631	0.46037	DOWN	acyl carrier protein	78898.MVEG_07493T0	1.9e-14	84.7	Fungi incertae sedis	GO:0000035,GO:0000036,GO:0003674,GO:0005488,GO:0005575,GO:0005622,GO:0005623,GO:0005737,GO:0005739,GO:0005759,GO:0005829,GO:0005975,GO:0006082,GO:0006629,GO:0006631,GO:0006633,GO:0006643,GO:0006644,GO:0006664,GO:0006732,GO:0006790,GO:0006793,GO:0006796,GO:0008150,GO:0008152,GO:0008610,GO:0008654,GO:0009058,GO:0009106,GO:0009107,GO:0009108,GO:0009245,GO:0009247,GO:0009311,GO:0009312,GO:0009987,GO:…		ko00190,ko01100,ko04714,ko04723,ko04932,ko05010,ko05012,ko05016,map00190,map01100,map04714,map04723,map04932,map05010,map05012,map05016	M00146			ko00000,ko00001,ko00002	3.D.1.6			Fungi	1GXG9@112252,3A92K@33154,3P3WN@4751,COG0236@1,KOG1748@2759	NA|NA|NA	CIQ	acyl carrier protein
MA-00112-277	ACO2	ko:K17450	0.0067676	0.14011	DOWN	Aconitase family (aconitate hydratase)	78898.MVEG_04792T0	0	1478	Fungi incertae sedis	GO:0000313,GO:0000315,GO:0003674,GO:0003735,GO:0003824,GO:0003994,GO:0005198,GO:0005575,GO:0005622,GO:0005623,GO:0005634,GO:0005737,GO:0005739,GO:0005759,GO:0005761,GO:0005762,GO:0005840,GO:0006082,GO:0006091,GO:0006099,GO:0006101,GO:0006412,GO:0006518,GO:0006520,GO:0006536,GO:0006807,GO:0008150,GO:0008152,GO:0009058,GO:0009059,GO:0009060,GO:0009064,GO:0009987,GO:0010467,GO:0015934,GO:0015980,GO:…		ko00300,ko01100,ko01120,ko01130,ko01210,ko01230,map00300,map01100,map01120,map01130,map01210,map01230	M00030,M00433	R03444	RC00498	br01601,ko00000,ko00001,ko00002,ko01000				Fungi	1GRS0@112252,38DMZ@33154,3NV5K@4751,COG1048@1,KOG0453@2759	NA|NA|NA	CE	Aconitase family (aconitate hydratase)
MA-00120-148	ILV5	ko:K00053	0.015053	0.36641	DOWN	Acetohydroxy acid isomeroreductase, catalytic domain	78898.MVEG_08600T0	7.3e-201	706.4	Fungi incertae sedis	GO:0000002,GO:0003674,GO:0003676,GO:0003677,GO:0003690,GO:0003824,GO:0004455,GO:0005488,GO:0005575,GO:0005622,GO:0005623,GO:0005737,GO:0005739,GO:0005759,GO:0006082,GO:0006520,GO:0006549,GO:0006551,GO:0006573,GO:0006807,GO:0006996,GO:0007005,GO:0008150,GO:0008152,GO:0008652,GO:0009058,GO:0009081,GO:0009082,GO:0009097,GO:0009099,GO:0009295,GO:0009987,GO:0016043,GO:0016053,GO:0016491,GO:0016614,GO:…	1.1.1.86	ko00290,ko00770,ko01100,ko01110,ko01130,ko01210,ko01230,map00290,map00770,map01100,map01110,map01130,map01210,map01230	M00019,M00570	R03051,R04439,R04440,R05068,R05069,R05071	RC00726,RC00836,RC00837,RC01726	ko00000,ko00001,ko00002,ko01000			iMM904.YLR355C,iND750.YLR355C	Fungi	1GT3G@112252,2QQBF@2759,38GR1@33154,3NVDN@4751,COG0059@1	NA|NA|NA	G	Acetohydroxy acid isomeroreductase, catalytic domain
MA-00213-277		ko:K11352,ko:K18160	0.011066	0.25168	DOWN	Accessory subunit of the mitochondrial membrane respiratory chain NADH dehydrogenase (Complex I), that is believed not to be involved in catalysis. Complex I functions in the transfer of electrons from NADH to the respiratory chain. The immediate electron acceptor for the enzyme is believed to be ubiquinone	78898.MVEG_02909T0	1.8e-69	268.5	Fungi incertae sedis	GO:0005575,GO:0005622,GO:0005623,GO:0005737,GO:0005739,GO:0005740,GO:0005743,GO:0005746,GO:0005747,GO:0006950,GO:0006979,GO:0008150,GO:0016020,GO:0019866,GO:0030964,GO:0031090,GO:0031966,GO:0031967,GO:0031975,GO:0032991,GO:0043226,GO:0043227,GO:0043229,GO:0043231,GO:0044422,GO:0044424,GO:0044425,GO:0044429,GO:0044444,GO:0044446,GO:0044455,GO:0044464,GO:0045271,GO:0050896,GO:0070469,GO:0098796,GO:…		ko00190,ko01100,ko04714,ko04723,ko04932,ko05010,ko05012,ko05016,map00190,map01100,map04714,map04723,map04932,map05010,map05012,map05016	M00146			ko00000,ko00001,ko00002,ko03029	3.D.1.6			Fungi	1GUIV@112252,3A5JT@33154,3P3TS@4751,KOG3382@1,KOG3382@2759	NA|NA|NA	C	Accessory subunit of the mitochondrial membrane respiratory chain NADH dehydrogenase (Complex I), that is believed not to be involved in catalysis. Complex I functions in the transfer of electrons from NADH to the respiratory chain. The immediate electron acceptor for the enzyme is believed to be ubiquinone
MA-00139-273	FOL1	ko:K13939,ko:K13941	0.0020343	0.44993	DOWN	7,8-dihydro-6-hydroxymethylpterin-pyrophosphokinase (HPPK)	78898.MVEG_04709T0	0	1305.8	Fungi incertae sedis	GO:0003674,GO:0003824,GO:0003848,GO:0004150,GO:0004156,GO:0005575,GO:0005622,GO:0005623,GO:0005737,GO:0005739,GO:0005740,GO:0006082,GO:0006575,GO:0006725,GO:0006732,GO:0006760,GO:0006807,GO:0008150,GO:0008152,GO:0009058,GO:0009108,GO:0009396,GO:0009987,GO:0016053,GO:0016740,GO:0016765,GO:0016772,GO:0016778,GO:0016829,GO:0016830,GO:0016832,GO:0018130,GO:0019438,GO:0019752,GO:0031967,GO:0031975,GO:…	2.5.1.15,2.7.6.3,4.1.2.25	ko00790,ko01100,map00790,map01100	M00126,M00840	R03066,R03067,R03503,R03504	RC00002,RC00017,RC00121,RC00721,RC00842,RC00943	ko00000,ko00001,ko00002,ko01000				Fungi	1GRRM@112252,38FVT@33154,3NUR7@4751,COG0294@1,KOG2544@2759	NA|NA|NA	H	7,8-dihydro-6-hydroxymethylpterin-pyrophosphokinase (HPPK)
MA-00073-366	KGD1	ko:K00164	0.011735	0.19839	DOWN	2-oxoglutarate dehydrogenase N-terminus	78898.MVEG_02075T0	0	1943.7	Fungi incertae sedis	GO:0003674,GO:0003824,GO:0004591,GO:0005575,GO:0005622,GO:0005623,GO:0005737,GO:0005739,GO:0005759,GO:0005947,GO:0006082,GO:0006091,GO:0006099,GO:0006101,GO:0006103,GO:0008150,GO:0008152,GO:0009060,GO:0009295,GO:0009353,GO:0009987,GO:0015980,GO:0016491,GO:0016624,GO:0016903,GO:0016999,GO:0017144,GO:0019752,GO:0030062,GO:0031974,GO:0032991,GO:0042645,GO:0043226,GO:0043227,GO:0043228,GO:0043229,GO:…	1.2.4.2	ko00020,ko00310,ko00380,ko01100,ko01110,ko01120,ko01130,ko01200,map00020,map00310,map00380,map01100,map01110,map01120,map01130,map01200	M00009,M00011,M00032	R00621,R01933,R01940,R03316,R08549	RC00004,RC00027,RC00627,RC02743,RC02833,RC02883	br01601,ko00000,ko00001,ko00002,ko01000				Fungi	1GSXR@112252,38FJ2@33154,3NV83@4751,COG0567@1,KOG0450@2759	NA|NA|NA	G	2-oxoglutarate dehydrogenase N-terminus
MA-00317-5		ko:K03939	0.090479	0.47805	NoChange	Zinc-finger domain	78898.MVEG_08478T0	1.7e-48	198.7	Fungi incertae sedis	GO:0005575,GO:0005622,GO:0005623,GO:0005737,GO:0005739,GO:0005740,GO:0005743,GO:0005746,GO:0005747,GO:0006091,GO:0006119,GO:0006120,GO:0006139,GO:0006163,GO:0006725,GO:0006753,GO:0006793,GO:0006796,GO:0006807,GO:0008150,GO:0008152,GO:0009117,GO:0009123,GO:0009126,GO:0009141,GO:0009144,GO:0009150,GO:0009161,GO:0009167,GO:0009199,GO:0009205,GO:0009259,GO:0009987,GO:0015980,GO:0016020,GO:0016310,GO:…		ko00190,ko01100,ko04714,ko04723,ko04932,ko05010,ko05012,ko05016,map00190,map01100,map04714,map04723,map04932,map05010,map05012,map05016	M00143			ko00000,ko00001,ko00002	3.D.1.6			Fungi	1GU5U@112252,3A6F7@33154,3P5RA@4751,KOG3456@1,KOG3456@2759	NA|NA|NA	C	Zinc-finger domain
MA-00268-164	ETR1	ko:K07512	0.18989	1.6682	NoChange	Zinc-binding dehydrogenase	78898.MVEG_02377T0	1.3e-149	536.2	Fungi incertae sedis	GO:0003674,GO:0003824,GO:0005488,GO:0005575,GO:0005622,GO:0005623,GO:0005737,GO:0005739,GO:0006082,GO:0006091,GO:0006629,GO:0006631,GO:0006633,GO:0008150,GO:0008152,GO:0008270,GO:0008610,GO:0009058,GO:0009060,GO:0009987,GO:0015980,GO:0016053,GO:0016491,GO:0016627,GO:0016628,GO:0016631,GO:0019752,GO:0032787,GO:0043167,GO:0043169,GO:0043226,GO:0043227,GO:0043229,GO:0043231,GO:0043436,GO:0044237,GO:…	1.3.1.38	ko00062,ko01100,ko01212,map00062,map01100,map01212	M00085	R01278,R03776,R03856,R03989,R04753,R06985,R07162	RC00052	ko00000,ko00001,ko00002,ko01000			iMM904.YBR026C	Fungi	1GT4D@112252,38GDB@33154,3NTWX@4751,COG0604@1,KOG0025@2759	NA|NA|NA	CK	Zinc-binding dehydrogenase
MA-00072-183			0.90787	0.91771	NoChange	Zinc-binding dehydrogenase	78898.MVEG_04842T0	7.6e-101	374	Fungi incertae sedis	GO:0003674,GO:0003824,GO:0005575,GO:0005622,GO:0005623,GO:0005737,GO:0005739,GO:0008150,GO:0008152,GO:0016491,GO:0016614,GO:0016616,GO:0043226,GO:0043227,GO:0043229,GO:0043231,GO:0044424,GO:0044444,GO:0044464,GO:0055114										Fungi	1GU7E@112252,38DDK@33154,3P0CA@4751,COG0604@1,KOG1198@2759	NA|NA|NA	C	Zinc-binding dehydrogenase
MA-00184-339	RAD23	ko:K10839	0.23959	1.4955	NoChange	XPC-binding domain	78898.MVEG_07197T0	4.4e-84	318.5	Fungi incertae sedis	GO:0000109,GO:0000111,GO:0000122,GO:0000502,GO:0003674,GO:0003676,GO:0003677,GO:0003684,GO:0005488,GO:0005515,GO:0005575,GO:0005622,GO:0005623,GO:0005634,GO:0005737,GO:0005739,GO:0006139,GO:0006259,GO:0006281,GO:0006289,GO:0006355,GO:0006357,GO:0006464,GO:0006508,GO:0006511,GO:0006517,GO:0006725,GO:0006807,GO:0006950,GO:0006974,GO:0008150,GO:0008152,GO:0009056,GO:0009057,GO:0009100,GO:0009889,GO:…		ko03420,ko04141,map03420,map04141				ko00000,ko00001,ko03051,ko03400				Fungi	1GSIT@112252,38CFS@33154,3NWKD@4751,COG5272@1,KOG0011@2759	NA|NA|NA	L	XPC-binding domain
MA-00120-21	KOG1	ko:K07204	0.11068	1.6252	NoChange	WD40 repeats	78898.MVEG_08578T0	0	2305.8	Fungi incertae sedis	GO:0000322,GO:0000323,GO:0000324,GO:0000329,GO:0001101,GO:0001558,GO:0001932,GO:0001934,GO:0003674,GO:0005488,GO:0005515,GO:0005575,GO:0005622,GO:0005623,GO:0005737,GO:0005739,GO:0005773,GO:0005774,GO:0005886,GO:0006950,GO:0007154,GO:0007165,GO:0008150,GO:0008361,GO:0009267,GO:0009605,GO:0009719,GO:0009893,GO:0009894,GO:0009987,GO:0009991,GO:0010033,GO:0010243,GO:0010494,GO:0010506,GO:0010562,GO:…		ko04136,ko04138,ko04140,ko04150,ko04151,ko04152,ko04211,ko04213,ko04714,ko04910,ko05206,map04136,map04138,map04140,map04150,map04151,map04152,map04211,map04213,map04714,map04910,map05206				ko00000,ko00001,ko04131				Fungi	1GS10@112252,38C2A@33154,3NUIX@4751,KOG1517@1,KOG1517@2759	NA|NA|NA	D	WD40 repeats
MA-00184-379	VPS13	ko:K19525	0.08418	1.7209	NoChange	Vacuolar-sorting-associated 13 protein C-terminal	78898.MVEG_07211T0	0	5188.6	Fungi incertae sedis	GO:0000003,GO:0003006,GO:0005575,GO:0005622,GO:0005623,GO:0005628,GO:0005737,GO:0005739,GO:0005768,GO:0006605,GO:0006623,GO:0006810,GO:0006886,GO:0006996,GO:0007005,GO:0007034,GO:0007049,GO:0008104,GO:0008150,GO:0009653,GO:0009987,GO:0010927,GO:0012505,GO:0015031,GO:0015833,GO:0016020,GO:0016043,GO:0016192,GO:0019898,GO:0019953,GO:0022402,GO:0022413,GO:0022414,GO:0022607,GO:0030154,GO:0030435,GO:…						ko00000				Fungi	1GT6E@112252,38B64@33154,3NVAS@4751,COG5043@1,KOG1809@2759	NA|NA|NA	U	Vacuolar-sorting-associated 13 protein C-terminal
MA-00101-545			0.070147	2.8558	NoChange	Uncharacterized ACR, YdiU/UPF0061 family	78898.MVEG_09851T0	1.1e-292	1012.3	Fungi incertae sedis	GO:0005575,GO:0005622,GO:0005623,GO:0005737,GO:0005739,GO:0043226,GO:0043227,GO:0043229,GO:0043231,GO:0044424,GO:0044444,GO:0044464										Fungi	1GSE7@112252,38CWY@33154,3NTY4@4751,COG0397@1,KOG2542@2759	NA|NA|NA	S	Uncharacterized ACR, YdiU/UPF0061 family
MA-00090-544			0.66837	1.1516	NoChange	Uncharacterised protein family (UPF0160)	78898.MVEG_09547T0	1.6e-177	628.6	Fungi incertae sedis	GO:0003674,GO:0003824,GO:0005575,GO:0005622,GO:0005623,GO:0005634,GO:0005737,GO:0005739,GO:0016787,GO:0043226,GO:0043227,GO:0043229,GO:0043231,GO:0044424,GO:0044444,GO:0044464										Fungi	1GSJM@112252,38BVY@33154,3NVK7@4751,COG4286@1,KOG2948@2759	NA|NA|NA	S	Uncharacterised protein family (UPF0160)
MA-00184-454	RMD1		0.71687	1.5639	NoChange	Uncharacterised ACR, YagE family COG1723	78898.MVEG_07295T0	6.4e-79	300.1	Fungi incertae sedis	GO:0000322,GO:0000323,GO:0000324,GO:0000329,GO:0005575,GO:0005622,GO:0005623,GO:0005737,GO:0005739,GO:0005773,GO:0005774,GO:0008150,GO:0008152,GO:0010467,GO:0016020,GO:0031090,GO:0043170,GO:0043226,GO:0043227,GO:0043229,GO:0043231,GO:0044422,GO:0044424,GO:0044437,GO:0044444,GO:0044446,GO:0044464,GO:0071704,GO:0098588,GO:0098805,GO:0098852,GO:0140053										Fungi	1GSYC@112252,38RKJ@33154,3NUN9@4751,COG1723@1,KOG2861@2759	NA|NA|NA	S	Uncharacterised ACR, YagE family COG1723
MA-00120-5	ATG7	ko:K01493,ko:K08337	0.055262	1.8488	NoChange	Ubiquitin-like modifier-activating enzyme ATG7 N-terminus	78898.MVEG_08506T0	0	1085.9	Fungi incertae sedis	GO:0000045,GO:0000407,GO:0000422,GO:0003674,GO:0003824,GO:0005575,GO:0005622,GO:0005623,GO:0005737,GO:0005739,GO:0005829,GO:0006464,GO:0006497,GO:0006501,GO:0006807,GO:0006914,GO:0006950,GO:0006995,GO:0006996,GO:0007005,GO:0007033,GO:0007154,GO:0008104,GO:0008150,GO:0008152,GO:0008641,GO:0009056,GO:0009058,GO:0009059,GO:0009267,GO:0009605,GO:0009987,GO:0009991,GO:0016020,GO:0016043,GO:0016236,GO:…	3.5.4.12	ko00240,ko01100,ko04136,ko04138,ko04140,ko04216,map00240,map01100,map04136,map04138,map04140,map04216	M00429	R01663	RC00074	ko00000,ko00001,ko00002,ko01000,ko02044,ko03029,ko04121,ko04131				Fungi	1GS4J@112252,38CKP@33154,3NW0M@4751,COG0476@1,KOG2337@2759	NA|NA|NA	H	Ubiquitin-like modifier-activating enzyme ATG7 N-terminus
MA-00213-531	BMS1	ko:K14569	0.4576	0.82085	NoChange	U3 snoRNA binding	78898.MVEG_04953T0	0	1641.3	Fungi incertae sedis	GO:0000166,GO:0000462,GO:0000469,GO:0000472,GO:0000478,GO:0000479,GO:0000480,GO:0000966,GO:0000967,GO:0001882,GO:0001883,GO:0003674,GO:0003676,GO:0003723,GO:0003729,GO:0003824,GO:0003924,GO:0005488,GO:0005525,GO:0005575,GO:0005622,GO:0005623,GO:0005634,GO:0005730,GO:0005737,GO:0005739,GO:0006139,GO:0006364,GO:0006396,GO:0006725,GO:0006807,GO:0006996,GO:0008150,GO:0008152,GO:0009987,GO:0010467,GO:…		ko03008,map03008				ko00000,ko00001,ko03009				Fungi	1GVR8@112252,38WKY@33154,3NXR7@4751,COG5192@1,KOG1951@2759	NA|NA|NA	J	U3 snoRNA binding
MA-00090-202	MSY1	ko:K01866	0.67457	0.87034	NoChange	tRNA synthetases class I (W and Y)	78898.MVEG_03824T0	4.3e-219	767.3	Fungi incertae sedis	GO:0000166,GO:0000372,GO:0000375,GO:0000376,GO:0000959,GO:0003674,GO:0003676,GO:0003723,GO:0003824,GO:0004812,GO:0004831,GO:0005488,GO:0005515,GO:0005524,GO:0005575,GO:0005622,GO:0005623,GO:0005737,GO:0005739,GO:0005759,GO:0005829,GO:0006082,GO:0006139,GO:0006396,GO:0006399,GO:0006412,GO:0006418,GO:0006437,GO:0006518,GO:0006520,GO:0006725,GO:0006807,GO:0008144,GO:0008150,GO:0008152,GO:0008380,GO:…	6.1.1.1	ko00970,map00970	M00359,M00360	R02918	RC00055,RC00523	ko00000,ko00001,ko00002,ko01000,ko01007,ko03016,ko03029				Fungi	1GSBI@112252,38DXN@33154,3NTZP@4751,COG0162@1,KOG2623@2759	NA|NA|NA	J	tRNA synthetases class I (W and Y)
MA-00189-182	TPI1	ko:K01803	0.93226	0.97297	NoChange	Triosephosphate isomerase	78898.MVEG_03217T0	2.7e-121	441.4	Fungi incertae sedis	GO:0001968,GO:0003674,GO:0003824,GO:0004807,GO:0005488,GO:0005515,GO:0005575,GO:0005576,GO:0005618,GO:0005622,GO:0005623,GO:0005737,GO:0005739,GO:0005829,GO:0005886,GO:0005975,GO:0005996,GO:0006006,GO:0006007,GO:0006066,GO:0006071,GO:0006081,GO:0006082,GO:0006090,GO:0006091,GO:0006094,GO:0006096,GO:0006139,GO:0006163,GO:0006164,GO:0006165,GO:0006725,GO:0006732,GO:0006733,GO:0006734,GO:0006735,GO:…	5.3.1.1	ko00010,ko00051,ko00562,ko00710,ko01100,ko01110,ko01120,ko01130,ko01200,ko01230,map00010,map00051,map00562,map00710,map01100,map01110,map01120,map01130,map01200,map01230	M00001,M00002,M00003	R01015	RC00423	ko00000,ko00001,ko00002,ko01000,ko04147				Fungi	1GSER@112252,38ETQ@33154,3NW35@4751,COG0149@1,KOG1643@2759	NA|NA|NA	G	Triosephosphate isomerase
MA-00111-82	GSY1	ko:K00693	0.93618	0.98293	NoChange	Transfers the glycosyl residue from UDP-Glc to the non- reducing end of alpha-1,4-glucan	78898.MVEG_10541T0	0	1368.2	Fungi incertae sedis	GO:0000271,GO:0003674,GO:0003824,GO:0004373,GO:0005575,GO:0005622,GO:0005623,GO:0005634,GO:0005737,GO:0005739,GO:0005975,GO:0005976,GO:0005977,GO:0005978,GO:0006073,GO:0006091,GO:0006112,GO:0008150,GO:0008152,GO:0008194,GO:0009058,GO:0009059,GO:0009250,GO:0009987,GO:0015980,GO:0016051,GO:0016740,GO:0016757,GO:0016758,GO:0033692,GO:0034637,GO:0034645,GO:0035251,GO:0043170,GO:0043226,GO:0043227,GO:…	2.4.1.11	ko00500,ko01100,ko04151,ko04152,ko04910,ko04922,ko04931,map00500,map01100,map04151,map04152,map04910,map04922,map04931		R00292	RC00005	ko00000,ko00001,ko01000,ko01003		GT3		Fungi	1GVAS@112252,38BSH@33154,3NU8X@4751,COG0438@1,KOG3742@2759	NA|NA|NA	G	Transfers the glycosyl residue from UDP-Glc to the non- reducing end of alpha-1,4-glucan
MA-00120-580	GSY1	ko:K00693	0.72097	0.83403	NoChange	Transfers the glycosyl residue from UDP-Glc to the non- reducing end of alpha-1,4-glucan	78898.MVEG_10541T0	0	1411.7	Fungi incertae sedis	GO:0000271,GO:0003674,GO:0003824,GO:0004373,GO:0005575,GO:0005622,GO:0005623,GO:0005634,GO:0005737,GO:0005739,GO:0005975,GO:0005976,GO:0005977,GO:0005978,GO:0006073,GO:0006091,GO:0006112,GO:0008150,GO:0008152,GO:0008194,GO:0009058,GO:0009059,GO:0009250,GO:0009987,GO:0015980,GO:0016051,GO:0016740,GO:0016757,GO:0016758,GO:0033692,GO:0034637,GO:0034645,GO:0035251,GO:0043170,GO:0043226,GO:0043227,GO:…	2.4.1.11	ko00500,ko01100,ko04151,ko04152,ko04910,ko04922,ko04931,map00500,map01100,map04151,map04152,map04910,map04922,map04931		R00292	RC00005	ko00000,ko00001,ko01000,ko01003		GT3		Fungi	1GVAS@112252,38BSH@33154,3NU8X@4751,COG0438@1,KOG3742@2759	NA|NA|NA	G	Transfers the glycosyl residue from UDP-Glc to the non- reducing end of alpha-1,4-glucan
MA-00182-350	CAF17	ko:K22073	0.77636	0.89601	NoChange	transferase caf17, mitochondrial	78898.MVEG_09174T0	6.9e-153	547	Fungi incertae sedis	GO:0005575,GO:0005622,GO:0005623,GO:0005737,GO:0005739,GO:0005759,GO:0006790,GO:0008150,GO:0008152,GO:0009987,GO:0016043,GO:0016226,GO:0022607,GO:0031163,GO:0031974,GO:0043226,GO:0043227,GO:0043229,GO:0043231,GO:0043233,GO:0044085,GO:0044237,GO:0044422,GO:0044424,GO:0044429,GO:0044444,GO:0044446,GO:0044464,GO:0044572,GO:0051186,GO:0070013,GO:0071840						ko00000,ko01000,ko03029				Fungi	1GU6V@112252,39TYK@33154,3NVKT@4751,COG0354@1,KOG2929@2759	NA|NA|NA	K	transferase caf17, mitochondrial
MA-00067-192	TIM23	ko:K17794	0.095788	0.57995	NoChange	Tim17/Tim22/Tim23/Pmp24 family	78898.MVEG_10002T0	4.3e-88	330.9	Fungi incertae sedis	GO:0003674,GO:0005048,GO:0005488,GO:0005575,GO:0005622,GO:0005623,GO:0005737,GO:0005739,GO:0005740,GO:0005743,GO:0005744,GO:0006605,GO:0006626,GO:0006810,GO:0006839,GO:0006886,GO:0006996,GO:0007005,GO:0008104,GO:0008150,GO:0009987,GO:0015031,GO:0015833,GO:0016020,GO:0016021,GO:0016043,GO:0017038,GO:0019866,GO:0030150,GO:0030943,GO:0031090,GO:0031224,GO:0031300,GO:0031301,GO:0031304,GO:0031305,GO:…		ko04212,map04212				ko00000,ko00001,ko02000,ko03029	3.A.8.1			Fungi	1GX1G@112252,39RT6@33154,3NW8D@4751,COG5596@1,KOG3324@2759	NA|NA|NA	U	Tim17/Tim22/Tim23/Pmp24 family
MA-00213-651	TIM17	ko:K17795	0.59265	0.56351	NoChange	Tim17/Tim22/Tim23/Pmp24 family	78898.MVEG_10463T0	3.7e-79	300.8	Fungi incertae sedis	GO:0000002,GO:0003674,GO:0005215,GO:0005575,GO:0005622,GO:0005623,GO:0005737,GO:0005739,GO:0005740,GO:0005743,GO:0005744,GO:0006605,GO:0006626,GO:0006810,GO:0006839,GO:0006886,GO:0006996,GO:0007005,GO:0008104,GO:0008150,GO:0008320,GO:0008565,GO:0009987,GO:0015031,GO:0015399,GO:0015405,GO:0015450,GO:0015833,GO:0016020,GO:0016021,GO:0016043,GO:0017038,GO:0019866,GO:0022804,GO:0022857,GO:0022884,GO:…						ko00000,ko02000,ko03029	3.A.8.1			Fungi	1GTPF@112252,39V99@33154,3NZN8@4751,COG5596@1,KOG1652@2759	NA|NA|NA	U	Tim17/Tim22/Tim23/Pmp24 family
MA-00210-23			0.31417	0.49286	NoChange	Tim17/Tim22/Tim23/Pmp24 family	78898.MVEG_05352T0	1e-62	246.1	Fungi incertae sedis	GO:0005575,GO:0005622,GO:0005623,GO:0005737,GO:0005739,GO:0005740,GO:0005743,GO:0005744,GO:0006605,GO:0006626,GO:0006810,GO:0006839,GO:0006886,GO:0006996,GO:0007005,GO:0008104,GO:0008150,GO:0009987,GO:0015031,GO:0015833,GO:0016020,GO:0016021,GO:0016043,GO:0017038,GO:0019866,GO:0030150,GO:0031090,GO:0031224,GO:0031300,GO:0031301,GO:0031304,GO:0031305,GO:0031966,GO:0031967,GO:0031975,GO:0032592,GO:…										Fungi	1GUF2@112252,2C8WE@1,2S81D@2759,3A2AJ@33154,3P2XV@4751	NA|NA|NA	S	Tim17/Tim22/Tim23/Pmp24 family
MA-00153-218	TIM10	ko:K17778,ko:K17781	0.42883	0.70222	NoChange	Tim10/DDP family zinc finger	78898.MVEG_01711T0	1.9e-40	171.4	Fungi incertae sedis	GO:0003674,GO:0005215,GO:0005488,GO:0005515,GO:0005575,GO:0005622,GO:0005623,GO:0005737,GO:0005739,GO:0005740,GO:0005743,GO:0005758,GO:0006605,GO:0006626,GO:0006810,GO:0006839,GO:0006886,GO:0006996,GO:0007005,GO:0007006,GO:0007007,GO:0008104,GO:0008150,GO:0008565,GO:0009987,GO:0015031,GO:0015833,GO:0016020,GO:0016021,GO:0016043,GO:0017038,GO:0019866,GO:0031090,GO:0031224,GO:0031966,GO:0031967,GO:…						ko00000,ko02000,ko03029	3.A.8.1			Fungi	1GUJ4@112252,3A8N1@33154,3P6VS@4751,KOG3480@1,KOG3480@2759	NA|NA|NA	U	Tim10/DDP family zinc finger
MA-00120-175	TIM13	ko:K17781	0.11715	0.59687	NoChange	Tim10/DDP family zinc finger	78898.MVEG_10626T0	9.2e-44	182.6	Fungi incertae sedis	GO:0003674,GO:0005215,GO:0005575,GO:0005622,GO:0005623,GO:0005737,GO:0005739,GO:0005740,GO:0005758,GO:0006605,GO:0006626,GO:0006810,GO:0006839,GO:0006886,GO:0006996,GO:0007005,GO:0007006,GO:0007007,GO:0008104,GO:0008150,GO:0008565,GO:0009987,GO:0015031,GO:0015833,GO:0016020,GO:0016021,GO:0016043,GO:0017038,GO:0031224,GO:0031967,GO:0031970,GO:0031974,GO:0031975,GO:0032991,GO:0033036,GO:0033365,GO:…						ko00000,ko02000,ko03029	3.A.8.1			Fungi	1GU94@112252,3A8DD@33154,3P6U7@4751,KOG1733@1,KOG1733@2759	NA|NA|NA	U	Tim10/DDP family zinc finger
MA-00072-257	POT1	ko:K07513	0.024396	1.7845	NoChange	Thiolase, N-terminal domain	78898.MVEG_04796T0	1.9e-178	632.1	Fungi incertae sedis	GO:0003674,GO:0003676,GO:0003723,GO:0003729,GO:0003824,GO:0003988,GO:0005488,GO:0005575,GO:0005622,GO:0005623,GO:0005737,GO:0005739,GO:0005740,GO:0005758,GO:0005777,GO:0005782,GO:0006082,GO:0006629,GO:0006631,GO:0006635,GO:0008150,GO:0008152,GO:0009056,GO:0009062,GO:0009987,GO:0016042,GO:0016054,GO:0016408,GO:0016740,GO:0016746,GO:0016747,GO:0019395,GO:0019752,GO:0030258,GO:0031907,GO:0031967,GO:…	2.3.1.16	ko00071,ko00280,ko00592,ko01040,ko01100,ko01110,ko01130,ko01212,ko03320,ko04146,map00071,map00280,map00592,map01040,map01100,map01110,map01130,map01212,map03320,map04146	M00087,M00113	R00927,R01177,R03778,R03858,R03991,R04546,R04742,R04747,R07891,R07895,R07899,R07937,R07953	RC00004,RC00326,RC00405,RC01702,RC02728	ko00000,ko00001,ko00002,ko01000				Fungi	1GS1H@112252,38F89@33154,3NUEC@4751,COG0183@1,KOG1389@2759	NA|NA|NA	I	Thiolase, N-terminal domain
MA-00153-356		ko:K00626	0.14559	0.72214	NoChange	Thiolase, N-terminal domain	78898.MVEG_02032T0	8.6e-205	719.5	Fungi incertae sedis	GO:0003674,GO:0003824,GO:0003985,GO:0003988,GO:0005575,GO:0005622,GO:0005623,GO:0005737,GO:0005739,GO:0005777,GO:0006082,GO:0006629,GO:0006631,GO:0006635,GO:0008150,GO:0008152,GO:0009056,GO:0009062,GO:0009987,GO:0016042,GO:0016054,GO:0016407,GO:0016408,GO:0016453,GO:0016740,GO:0016746,GO:0016747,GO:0019395,GO:0019752,GO:0030258,GO:0032787,GO:0034440,GO:0042579,GO:0043226,GO:0043227,GO:0043229,GO:…	2.3.1.9	ko00071,ko00072,ko00280,ko00310,ko00362,ko00380,ko00620,ko00630,ko00640,ko00650,ko00720,ko00900,ko01100,ko01110,ko01120,ko01130,ko01200,ko01212,ko02020,map00071,map00072,map00280,map00310,map00362,map00380,map00620,map00630,map00640,map00650,map00720,map00900,map01100,map01110,map01120,map01130,map01200,map01212,map02020	M00088,M00095,M00373,M00374,M00375	R00238,R01177	RC00004,RC00326	ko00000,ko00001,ko00002,ko01000,ko04147				Fungi	1GSCQ@112252,38C4X@33154,3NV1W@4751,COG0183@1,KOG1390@2759	NA|NA|NA	I	Thiolase, N-terminal domain
MA-00139-47	TES1	ko:K01068,ko:K11992	0.97036	1.0145	NoChange	Thioesterase-like superfamily	78898.MVEG_10945T0	9.6e-145	519.6	Fungi incertae sedis	GO:0003674,GO:0003824,GO:0005575,GO:0005622,GO:0005623,GO:0005737,GO:0005739,GO:0005777,GO:0005782,GO:0006082,GO:0006139,GO:0006163,GO:0006629,GO:0006631,GO:0006635,GO:0006637,GO:0006725,GO:0006732,GO:0006753,GO:0006790,GO:0006793,GO:0006796,GO:0006807,GO:0008150,GO:0008152,GO:0009056,GO:0009062,GO:0009117,GO:0009150,GO:0009259,GO:0009987,GO:0016042,GO:0016054,GO:0016289,GO:0016787,GO:0016788,GO:…	3.1.2.2,3.1.2.27	ko00062,ko00120,ko01040,ko01100,ko01110,ko04146,map00062,map00120,map01040,map01100,map01110,map04146	M00104	R01274,R03974,R07296,R08174,R08175,R08176,R08177,R08178,R08179,R08180,R08181,R08182,R08183,R09450	RC00004,RC00014	ko00000,ko00001,ko00002,ko01000,ko01004				Fungi	1GTEY@112252,38GG7@33154,3NXST@4751,COG1946@1,KOG3016@2759	NA|NA|NA	I	Thioesterase-like superfamily
MA-00268-71		ko:K22132	0.8205	0.83445	NoChange	ThiF family	78898.MVEG_01938T0	4.7e-197	694.1	Fungi incertae sedis	GO:0003674,GO:0003824,GO:0005575,GO:0005622,GO:0005623,GO:0005737,GO:0005739,GO:0005740,GO:0005741,GO:0006139,GO:0006396,GO:0006399,GO:0006400,GO:0006725,GO:0006807,GO:0008033,GO:0008150,GO:0008152,GO:0008641,GO:0009451,GO:0009987,GO:0010467,GO:0016020,GO:0016070,GO:0016829,GO:0016835,GO:0016836,GO:0016874,GO:0016877,GO:0019867,GO:0031090,GO:0031966,GO:0031967,GO:0031968,GO:0031975,GO:0034470,GO:…						ko00000,ko03016				Fungi	1GS8R@112252,38EFZ@33154,3NVU4@4751,COG1179@1,KOG2018@2759	NA|NA|NA	O	ThiF family
MA-00190-89	THI4	ko:K03146	0.7394	0.81061	NoChange	Thi4 family	78898.MVEG_07688T0	9.2e-159	566.2	Fungi incertae sedis	GO:0000002,GO:0003674,GO:0005488,GO:0005506,GO:0005575,GO:0005622,GO:0005623,GO:0005737,GO:0005739,GO:0005829,GO:0006725,GO:0006766,GO:0006767,GO:0006772,GO:0006790,GO:0006807,GO:0006996,GO:0007005,GO:0008150,GO:0008152,GO:0008198,GO:0009058,GO:0009110,GO:0009228,GO:0009987,GO:0016043,GO:0017144,GO:0018130,GO:0018131,GO:0019438,GO:0034641,GO:0042364,GO:0042723,GO:0042724,GO:0043167,GO:0043169,GO:…		ko00730,ko01100,map00730,map01100		R10685	RC00033,RC03253,RC03254	ko00000,ko00001				Fungi	1GSC2@112252,38D0Z@33154,3NX5E@4751,COG1635@1,KOG2960@2759	NA|NA|NA	H	Thi4 family
MA-00297-412	SPT5	ko:K15172	0.79927	0.86322	NoChange	The SPT4-SPT5 complex mediates both activation and inhibition of transcription elongation, and plays a role in pre- mRNA processing. This complex seems to be important for the stability of the RNA polymerase II elongation machinery on the chromatin template but not for the inherent ability of this machinery to translocate down the gene	78898.MVEG_07961T0	0	1189.1	Fungi incertae sedis	GO:0000228,GO:0000375,GO:0000377,GO:0000398,GO:0000785,GO:0000790,GO:0000988,GO:0000990,GO:0000991,GO:0000993,GO:0001042,GO:0001098,GO:0001099,GO:0001179,GO:0001181,GO:0003674,GO:0003676,GO:0003677,GO:0003723,GO:0003729,GO:0005488,GO:0005515,GO:0005575,GO:0005622,GO:0005623,GO:0005634,GO:0005654,GO:0005694,GO:0005737,GO:0005739,GO:0006139,GO:0006282,GO:0006351,GO:0006354,GO:0006355,GO:0006356,GO:…						ko00000,ko03019,ko03021				Fungi	1GT4H@112252,38GVC@33154,3NUM8@4751,COG5164@1,KOG1999@2759	NA|NA|NA	K	The SPT4-SPT5 complex mediates both activation and inhibition of transcription elongation, and plays a role in pre- mRNA processing. This complex seems to be important for the stability of the RNA polymerase II elongation machinery on the chromatin template but not for the inherent ability of this machinery to translocate down the gene
MA-00189-376	PDA1	ko:K00161	0.79755	0.94281	NoChange	The pyruvate dehydrogenase complex catalyzes the overall conversion of pyruvate to acetyl-CoA and CO(2)	78898.MVEG_09006T0	3e-199	701	Fungi incertae sedis	GO:0003674,GO:0003824,GO:0004738,GO:0004739,GO:0005575,GO:0005622,GO:0005623,GO:0005634,GO:0005730,GO:0005737,GO:0005739,GO:0005759,GO:0005967,GO:0006082,GO:0006084,GO:0006085,GO:0006086,GO:0006090,GO:0006091,GO:0006099,GO:0006101,GO:0006139,GO:0006163,GO:0006164,GO:0006637,GO:0006725,GO:0006732,GO:0006753,GO:0006790,GO:0006793,GO:0006796,GO:0006807,GO:0007124,GO:0008150,GO:0008152,GO:0009058,GO:…	1.2.4.1	ko00010,ko00020,ko00620,ko01100,ko01110,ko01120,ko01130,ko01200,ko04066,ko04922,ko05230,map00010,map00020,map00620,map01100,map01110,map01120,map01130,map01200,map04066,map04922,map05230	M00307	R00014,R00209,R01699,R03270	RC00004,RC00027,RC00627,RC02742,RC02744,RC02882	br01601,ko00000,ko00001,ko00002,ko01000			iMM904.YER178W,iND750.YER178W	Fungi	1GSKU@112252,38G37@33154,3NUI6@4751,COG0462@1,KOG0225@2759	NA|NA|NA	C	The pyruvate dehydrogenase complex catalyzes the overall conversion of pyruvate to acetyl-CoA and CO(2)
MA-00120-88	LAT1	ko:K00627	0.68939	0.84774	NoChange	The pyruvate dehydrogenase complex catalyzes the overall conversion of pyruvate to acetyl-CoA and CO(2)	78898.MVEG_08737T0	5.6e-206	723.8	Fungi incertae sedis	GO:0003674,GO:0003824,GO:0004742,GO:0005575,GO:0005622,GO:0005623,GO:0005737,GO:0005739,GO:0005759,GO:0005967,GO:0006082,GO:0006084,GO:0006085,GO:0006086,GO:0006090,GO:0006139,GO:0006163,GO:0006164,GO:0006637,GO:0006725,GO:0006732,GO:0006753,GO:0006790,GO:0006793,GO:0006796,GO:0006807,GO:0008150,GO:0008152,GO:0009058,GO:0009108,GO:0009117,GO:0009150,GO:0009152,GO:0009165,GO:0009259,GO:0009260,GO:…	2.3.1.12	ko00010,ko00020,ko00620,ko01100,ko01110,ko01120,ko01130,ko01200,map00010,map00020,map00620,map01100,map01110,map01120,map01130,map01200	M00307	R00209,R02569	RC00004,RC02742,RC02857	br01601,ko00000,ko00001,ko00002,ko01000				Fungi	1GSZ0@112252,38BJW@33154,3NVAH@4751,COG0508@1,KOG0557@2759	NA|NA|NA	C	The pyruvate dehydrogenase complex catalyzes the overall conversion of pyruvate to acetyl-CoA and CO(2)
MA-00072-146	GCV3	ko:K02437	0.99457	1.0081	NoChange	The H protein shuttles the methylamine group of glycine from the P protein to the T protein	78898.MVEG_04888T0	7.7e-52	209.9	Fungi incertae sedis	GO:0001505,GO:0005575,GO:0005622,GO:0005623,GO:0005737,GO:0005739,GO:0005960,GO:0006082,GO:0006464,GO:0006520,GO:0006544,GO:0006546,GO:0006730,GO:0006807,GO:0008150,GO:0008152,GO:0009056,GO:0009063,GO:0009069,GO:0009071,GO:0009249,GO:0009987,GO:0010467,GO:0016054,GO:0017144,GO:0018065,GO:0018193,GO:0018205,GO:0019464,GO:0019538,GO:0019752,GO:0032991,GO:0036211,GO:0042133,GO:0042135,GO:0042737,GO:…		ko00260,ko00630,ko01100,ko01110,ko01130,ko01200,map00260,map00630,map01100,map01110,map01130,map01200	M00532	R01221	RC00022,RC02834	ko00000,ko00001,ko00002				Fungi	1GX4C@112252,3A5U5@33154,3P4M7@4751,COG0509@1,KOG3373@2759	NA|NA|NA	E	The H protein shuttles the methylamine group of glycine from the P protein to the T protein
MA-00189-501	HSP60	ko:K04077	0.029777	0.56078	NoChange	TCP-1/cpn60 chaperonin family	78898.MVEG_05991T0	2.9e-294	1017.3	Fungi incertae sedis	GO:0000166,GO:0003674,GO:0003676,GO:0003677,GO:0003688,GO:0003690,GO:0003697,GO:0003824,GO:0005488,GO:0005515,GO:0005524,GO:0005575,GO:0005622,GO:0005623,GO:0005634,GO:0005681,GO:0005737,GO:0005739,GO:0005740,GO:0005758,GO:0005759,GO:0005829,GO:0006457,GO:0006458,GO:0006605,GO:0006626,GO:0006807,GO:0006810,GO:0006839,GO:0006886,GO:0006915,GO:0006950,GO:0006970,GO:0006996,GO:0007005,GO:0008104,GO:…		ko03018,ko04212,ko04940,ko05134,ko05152,map03018,map04212,map04940,map05134,map05152				ko00000,ko00001,ko03019,ko03029,ko03110,ko04147				Fungi	1GT6C@112252,38BJH@33154,3NY3W@4751,COG0459@1,KOG0356@2759	NA|NA|NA	O	TCP-1/cpn60 chaperonin family
MA-00184-261		ko:K07277	0.12908	0.69313	NoChange	Surface antigen	78898.MVEG_07333T0	5.6e-245	853.2	Fungi incertae sedis	GO:0001401,GO:0005575,GO:0005622,GO:0005623,GO:0005737,GO:0005739,GO:0005740,GO:0005741,GO:0006605,GO:0006626,GO:0006810,GO:0006839,GO:0006886,GO:0006996,GO:0007005,GO:0007006,GO:0008104,GO:0008150,GO:0009987,GO:0015031,GO:0015833,GO:0016020,GO:0016043,GO:0017038,GO:0019867,GO:0031090,GO:0031966,GO:0031967,GO:0031968,GO:0031975,GO:0032991,GO:0033036,GO:0033365,GO:0034613,GO:0042886,GO:0043226,GO:…						ko00000,ko02000,ko03029	1.B.33			Fungi	1GSJZ@112252,38E84@33154,3NUW7@4751,COG4775@1,KOG2602@2759	NA|NA|NA	M	Surface antigen
MA-00210-75	LSC1	ko:K01899	0.78554	1.0771	NoChange	Succinyl-CoA synthetase functions in the citric acid cycle (TCA), coupling the hydrolysis of succinyl-CoA to the synthesis of ATP and thus represents the only step of substrate- level phosphorylation in the TCA. The alpha subunit of the enzyme binds the substrates coenzyme A and phosphate, while succinate binding and nucleotide specificity is provided by the beta subunit	78898.MVEG_02205T0	6.3e-163	580.1	Fungi incertae sedis	GO:0003674,GO:0003824,GO:0004774,GO:0004775,GO:0004776,GO:0005575,GO:0005622,GO:0005623,GO:0005737,GO:0005739,GO:0005759,GO:0006082,GO:0006091,GO:0006099,GO:0006101,GO:0006104,GO:0006139,GO:0006163,GO:0006637,GO:0006725,GO:0006732,GO:0006753,GO:0006790,GO:0006793,GO:0006796,GO:0006807,GO:0008150,GO:0008152,GO:0009060,GO:0009117,GO:0009150,GO:0009259,GO:0009295,GO:0009987,GO:0015980,GO:0016874,GO:…	6.2.1.4,6.2.1.5	ko00020,ko00640,ko01100,ko01110,ko01120,ko01130,ko01200,map00020,map00640,map01100,map01110,map01120,map01130,map01200	M00009,M00011	R00432,R00727	RC00004,RC00014	ko00000,ko00001,ko00002,ko01000				Fungi	1GSJ5@112252,38DG1@33154,3NWU7@4751,COG0074@1,KOG1255@2759	NA|NA|NA	C	Succinyl-CoA synthetase functions in the citric acid cycle (TCA), coupling the hydrolysis of succinyl-CoA to the synthesis of ATP and thus represents the only step of substrate- level phosphorylation in the TCA. The alpha subunit of the enzyme binds the substrates coenzyme A and phosphate, while succinate binding and nucleotide specificity is provided by the beta subunit
MA-00073-480	LSC1	ko:K01899	0.38861	0.87771	NoChange	Succinyl-CoA synthetase functions in the citric acid cycle (TCA), coupling the hydrolysis of succinyl-CoA to the synthesis of ATP and thus represents the only step of substrate- level phosphorylation in the TCA. The alpha subunit of the enzyme binds the substrates coenzyme A and phosphate, while succinate binding and nucleotide specificity is provided by the beta subunit	78898.MVEG_02205T0	1.5e-161	575.5	Fungi incertae sedis	GO:0003674,GO:0003824,GO:0004774,GO:0004775,GO:0004776,GO:0005575,GO:0005622,GO:0005623,GO:0005737,GO:0005739,GO:0005759,GO:0006082,GO:0006091,GO:0006099,GO:0006101,GO:0006104,GO:0006139,GO:0006163,GO:0006637,GO:0006725,GO:0006732,GO:0006753,GO:0006790,GO:0006793,GO:0006796,GO:0006807,GO:0008150,GO:0008152,GO:0009060,GO:0009117,GO:0009150,GO:0009259,GO:0009295,GO:0009987,GO:0015980,GO:0016874,GO:…	6.2.1.4,6.2.1.5	ko00020,ko00640,ko01100,ko01110,ko01120,ko01130,ko01200,map00020,map00640,map01100,map01110,map01120,map01130,map01200	M00009,M00011	R00432,R00727	RC00004,RC00014	ko00000,ko00001,ko00002,ko01000				Fungi	1GSJ5@112252,38DG1@33154,3NWU7@4751,COG0074@1,KOG1255@2759	NA|NA|NA	C	Succinyl-CoA synthetase functions in the citric acid cycle (TCA), coupling the hydrolysis of succinyl-CoA to the synthesis of ATP and thus represents the only step of substrate- level phosphorylation in the TCA. The alpha subunit of the enzyme binds the substrates coenzyme A and phosphate, while succinate binding and nucleotide specificity is provided by the beta subunit
MA-00073-618	SDH2	ko:K00235	0.089774	0.60014	NoChange	succinate dehydrogenase ubiquinone iron-sulfur subunit, mitochondrial	78898.MVEG_06792T0	2.7e-146	524.6	Fungi incertae sedis	GO:0000104,GO:0003674,GO:0003824,GO:0005575,GO:0005622,GO:0005623,GO:0005737,GO:0005739,GO:0005740,GO:0005743,GO:0005746,GO:0005749,GO:0006082,GO:0006091,GO:0006099,GO:0006101,GO:0006105,GO:0006119,GO:0006121,GO:0006139,GO:0006163,GO:0006725,GO:0006753,GO:0006793,GO:0006796,GO:0006807,GO:0008150,GO:0008152,GO:0008177,GO:0009060,GO:0009117,GO:0009123,GO:0009126,GO:0009141,GO:0009144,GO:0009150,GO:…	1.3.5.1	ko00020,ko00190,ko01100,ko01110,ko01120,ko01130,ko01200,ko04714,ko04932,ko05010,ko05012,ko05016,map00020,map00190,map01100,map01110,map01120,map01130,map01200,map04714,map04932,map05010,map05012,map05016	M00009,M00011,M00148	R02164	RC00045	ko00000,ko00001,ko00002,ko01000				Fungi	1GSHC@112252,38CDD@33154,3NVAA@4751,COG0479@1,KOG3049@2759	NA|NA|NA	C	succinate dehydrogenase ubiquinone iron-sulfur subunit, mitochondrial
MA-00139-128	PTC7	ko:K17508	0.59265	0.82206	NoChange	Stage II sporulation protein E (SpoIIE)	78898.MVEG_00017T0	2.9e-140	505.4	Fungi incertae sedis	GO:0003674,GO:0003824,GO:0004721,GO:0004722,GO:0005575,GO:0005622,GO:0005623,GO:0005634,GO:0005635,GO:0005737,GO:0005739,GO:0006464,GO:0006470,GO:0006793,GO:0006796,GO:0006807,GO:0008150,GO:0008152,GO:0009889,GO:0009891,GO:0009893,GO:0009987,GO:0010565,GO:0010566,GO:0010795,GO:0012505,GO:0016311,GO:0016787,GO:0016788,GO:0016791,GO:0019222,GO:0019538,GO:0023052,GO:0031323,GO:0031325,GO:0031326,GO:…	3.1.3.16					ko00000,ko01000,ko01009				Fungi	1GS4N@112252,38HMT@33154,3NX30@4751,COG0631@1,KOG1379@2759	NA|NA|NA	T	Stage II sporulation protein E (SpoIIE)
MA-00323-56	SAP190	ko:K15457,ko:K15458,ko:K15501	0.8011	1.474	NoChange	SIT4 phosphatase-associated protein	78898.MVEG_11193T0	3.9e-283	981.1	Fungi incertae sedis	GO:0000082,GO:0000228,GO:0000278,GO:0000785,GO:0000790,GO:0002097,GO:0002098,GO:0003674,GO:0005575,GO:0005622,GO:0005623,GO:0005634,GO:0005654,GO:0005694,GO:0005737,GO:0005739,GO:0006139,GO:0006396,GO:0006399,GO:0006400,GO:0006725,GO:0006793,GO:0006796,GO:0006807,GO:0007049,GO:0007088,GO:0007154,GO:0007165,GO:0007346,GO:0008033,GO:0008047,GO:0008150,GO:0008152,GO:0008287,GO:0009451,GO:0009987,GO:…						ko00000,ko01009,ko03016,ko03400				Fungi	1GS12@112252,38EWF@33154,3NWBN@4751,KOG2073@1,KOG2073@2759	NA|NA|NA	D	SIT4 phosphatase-associated protein
MA-00120-216	SAP190	ko:K15457,ko:K15458,ko:K15501	0.79927	1.1696	NoChange	SIT4 phosphatase-associated protein	78898.MVEG_10634T0	0	1124	Fungi incertae sedis	GO:0000082,GO:0000228,GO:0000278,GO:0000785,GO:0000790,GO:0002097,GO:0002098,GO:0003674,GO:0005575,GO:0005622,GO:0005623,GO:0005634,GO:0005654,GO:0005694,GO:0005737,GO:0005739,GO:0006139,GO:0006396,GO:0006399,GO:0006400,GO:0006725,GO:0006793,GO:0006796,GO:0006807,GO:0007049,GO:0007088,GO:0007154,GO:0007165,GO:0007346,GO:0008033,GO:0008047,GO:0008150,GO:0008152,GO:0008287,GO:0009451,GO:0009987,GO:…						ko00000,ko01009,ko03016,ko03400				Fungi	1GS12@112252,38EWF@33154,3NWBN@4751,KOG2073@1,KOG2073@2759	NA|NA|NA	D	SIT4 phosphatase-associated protein
MA-00184-471	tmk2	ko:K04464	0.53361	1.1183	NoChange	Serine/Threonine protein kinases, catalytic domain	78898.MVEG_07303T0	3.1e-229	800.8	Fungi incertae sedis	GO:0000165,GO:0000166,GO:0000302,GO:0003674,GO:0003824,GO:0004672,GO:0004674,GO:0004707,GO:0005488,GO:0005524,GO:0005575,GO:0005622,GO:0005623,GO:0005634,GO:0005737,GO:0005739,GO:0005829,GO:0005933,GO:0005934,GO:0005935,GO:0005937,GO:0006355,GO:0006464,GO:0006468,GO:0006793,GO:0006796,GO:0006807,GO:0006873,GO:0006874,GO:0006875,GO:0006914,GO:0006950,GO:0006970,GO:0006979,GO:0006986,GO:0007154,GO:…	2.7.11.24	ko04010,ko04011,ko04138,ko04139,ko04540,ko04657,ko04722,ko04912,ko04921,ko05206,ko05418,map04010,map04011,map04138,map04139,map04540,map04657,map04722,map04912,map04921,map05206,map05418	M00690			ko00000,ko00001,ko00002,ko01000,ko01001				Fungi	1GSZB@112252,38BZX@33154,3NVP2@4751,KOG0660@1,KOG0660@2759	NA|NA|NA	T	Serine/Threonine protein kinases, catalytic domain
MA-00297-513	bem46	ko:K06889	0.36892	0.64834	NoChange	Serine aminopeptidase, S33	78898.MVEG_07881T0	3e-151	541.2	Fungi incertae sedis	GO:0000322,GO:0000323,GO:0000324,GO:0003674,GO:0003824,GO:0005575,GO:0005622,GO:0005623,GO:0005737,GO:0005739,GO:0005773,GO:0016787,GO:0016788,GO:0043226,GO:0043227,GO:0043229,GO:0043231,GO:0044424,GO:0044444,GO:0044464						ko00000				Fungi	1GSFT@112252,38DWX@33154,3NUS2@4751,COG1073@1,KOG4391@2759	NA|NA|NA	S	Serine aminopeptidase, S33
MA-00139-307		ko:K07305	0.072463	5.3171	NoChange	SelR domain	78898.MVEG_04416T0	2.2e-64	251.5	Fungi incertae sedis	GO:0003674,GO:0003824,GO:0005575,GO:0005622,GO:0005623,GO:0005737,GO:0005739,GO:0006807,GO:0006950,GO:0006979,GO:0008150,GO:0008152,GO:0009636,GO:0009987,GO:0016491,GO:0016667,GO:0016671,GO:0019538,GO:0030091,GO:0033554,GO:0033743,GO:0034599,GO:0042221,GO:0043170,GO:0043226,GO:0043227,GO:0043229,GO:0043231,GO:0044237,GO:0044238,GO:0044260,GO:0044267,GO:0044424,GO:0044444,GO:0044464,GO:0050896,GO:…	1.8.4.12					ko00000,ko01000				Fungi	1GTW1@112252,3A0BN@33154,3P2R6@4751,COG0229@1,KOG0856@2759	NA|NA|NA	O	SelR domain
MA-00153-585	SEC63	ko:K09540	0.77722	0.92693	NoChange	Sec63 Brl domain	78898.MVEG_02509T0	9e-297	1025.8	Fungi incertae sedis	GO:0003674,GO:0005215,GO:0005575,GO:0005622,GO:0005623,GO:0005737,GO:0005739,GO:0005783,GO:0005789,GO:0005791,GO:0006605,GO:0006612,GO:0006613,GO:0006614,GO:0006620,GO:0006810,GO:0006886,GO:0008104,GO:0008150,GO:0008565,GO:0012505,GO:0015031,GO:0015833,GO:0016020,GO:0016021,GO:0030867,GO:0031090,GO:0031204,GO:0031205,GO:0031207,GO:0031224,GO:0031984,GO:0032991,GO:0033036,GO:0033365,GO:0034613,GO:…		ko03060,ko04141,map03060,map04141				ko00000,ko00001,ko02044,ko03110	3.A.5.8,3.A.5.9			Fungi	1GSX3@112252,38CNP@33154,3NVTY@4751,COG5407@1,KOG0721@2759	NA|NA|NA	O	Sec63 Brl domain
MA-00139-243		ko:K12584	0.55243	1.2881	NoChange	Scavenger mRNA decapping enzyme (DcpS) N-terminal	78898.MVEG_04427T0	4.2e-132	477.6	Fungi incertae sedis	GO:0000288,GO:0000290,GO:0000339,GO:0000340,GO:0000932,GO:0000956,GO:0003674,GO:0003676,GO:0003723,GO:0003824,GO:0005488,GO:0005575,GO:0005622,GO:0005623,GO:0005634,GO:0005737,GO:0005739,GO:0006139,GO:0006401,GO:0006402,GO:0006725,GO:0006807,GO:0006950,GO:0007154,GO:0008047,GO:0008150,GO:0008152,GO:0009056,GO:0009057,GO:0009267,GO:0009605,GO:0009892,GO:0009893,GO:0009987,GO:0009991,GO:0010468,GO:…	3.6.1.59	ko03018,map03018		R04368	RC00002	ko00000,ko00001,ko01000,ko03019				Fungi	1GTRG@112252,38BBX@33154,3NX8D@4751,COG5075@1,KOG3969@2759	NA|NA|NA	S	Scavenger mRNA decapping enzyme (DcpS) N-terminal
MA-00153-10	ISU1	ko:K22068	0.77804	1.1896	NoChange	Scaffold protein for the de novo synthesis of iron- sulfur (Fe-S) clusters within mitochondria, which is required for maturation of both mitochondrial and cytoplasmic 2Fe-2S and 4Fe-4S proteins	78898.MVEG_09731T0	7.1e-75	286.6	Fungi incertae sedis	GO:0002097,GO:0002098,GO:0003674,GO:0003824,GO:0005488,GO:0005506,GO:0005575,GO:0005622,GO:0005623,GO:0005737,GO:0005739,GO:0005759,GO:0006139,GO:0006396,GO:0006399,GO:0006400,GO:0006725,GO:0006790,GO:0006807,GO:0006873,GO:0006875,GO:0006879,GO:0008033,GO:0008150,GO:0008152,GO:0008198,GO:0009451,GO:0009987,GO:0010467,GO:0016043,GO:0016070,GO:0016226,GO:0016740,GO:0016782,GO:0019538,GO:0019725,GO:…						ko00000,ko03029				Fungi	1GTE9@112252,3A1JG@33154,3P2QP@4751,COG0822@1,KOG3361@2759	NA|NA|NA	C	Scaffold protein for the de novo synthesis of iron- sulfur (Fe-S) clusters within mitochondria, which is required for maturation of both mitochondrial and cytoplasmic 2Fe-2S and 4Fe-4S proteins
MA-00073-569	SAC1	ko:K21797	0.24397	0.54569	NoChange	SacI homology domain	78898.MVEG_02132T0	3.8e-297	1026.9	Fungi incertae sedis	GO:0000139,GO:0002178,GO:0003674,GO:0003824,GO:0004438,GO:0005575,GO:0005622,GO:0005623,GO:0005737,GO:0005739,GO:0005740,GO:0005741,GO:0005783,GO:0005789,GO:0005794,GO:0005795,GO:0005797,GO:0005938,GO:0006629,GO:0006644,GO:0006650,GO:0006661,GO:0006793,GO:0006796,GO:0008150,GO:0008152,GO:0008610,GO:0008654,GO:0009058,GO:0009987,GO:0012505,GO:0016020,GO:0016021,GO:0016311,GO:0016787,GO:0016788,GO:…		ko00562,ko01100,ko04070,map00562,map01100,map04070		R11680	RC00078	ko00000,ko00001,ko01000				Fungi	1GRZU@112252,38DI4@33154,3NUMD@4751,COG5329@1,KOG1889@2759	NA|NA|NA	I	SacI homology domain
MA-00297-407	YME2		0.15946	1.7792	NoChange	RNA12 protein	78898.MVEG_10411T0	4.1e-201	707.6	Fungi incertae sedis	GO:0000002,GO:0003674,GO:0003676,GO:0003723,GO:0005488,GO:0005575,GO:0005622,GO:0005623,GO:0005737,GO:0005739,GO:0005740,GO:0005743,GO:0006996,GO:0007005,GO:0008150,GO:0009987,GO:0016020,GO:0016021,GO:0016043,GO:0019866,GO:0031090,GO:0031224,GO:0031300,GO:0031301,GO:0031304,GO:0031305,GO:0031966,GO:0031967,GO:0031975,GO:0032592,GO:0043226,GO:0043227,GO:0043229,GO:0043231,GO:0044422,GO:0044424,GO:…										Fungi	1GSZA@112252,28JMI@1,2QS0P@2759,39RWP@33154,3NUES@4751	NA|NA|NA	A	RNA12 protein
MA-00297-406	YME2		0.32827	1.4765	NoChange	RNA12 protein	78898.MVEG_10411T0	9e-148	530	Fungi incertae sedis	GO:0000002,GO:0003674,GO:0003676,GO:0003723,GO:0005488,GO:0005575,GO:0005622,GO:0005623,GO:0005737,GO:0005739,GO:0005740,GO:0005743,GO:0006996,GO:0007005,GO:0008150,GO:0009987,GO:0016020,GO:0016021,GO:0016043,GO:0019866,GO:0031090,GO:0031224,GO:0031300,GO:0031301,GO:0031304,GO:0031305,GO:0031966,GO:0031967,GO:0031975,GO:0032592,GO:0043226,GO:0043227,GO:0043229,GO:0043231,GO:0044422,GO:0044424,GO:…										Fungi	1GSZA@112252,28JMI@1,2QS0P@2759,39RWP@33154,3NUES@4751	NA|NA|NA	A	RNA12 protein
MA-00184-529	MRPS9	ko:K02996	0.20856	0.74464	NoChange	Ribosomal protein S9/S16	78898.MVEG_09705T0	3.2e-116	424.9	Fungi incertae sedis	GO:0000313,GO:0000314,GO:0000462,GO:0003674,GO:0003676,GO:0003723,GO:0003735,GO:0005198,GO:0005488,GO:0005575,GO:0005622,GO:0005623,GO:0005737,GO:0005739,GO:0005759,GO:0005761,GO:0005763,GO:0005840,GO:0006139,GO:0006364,GO:0006396,GO:0006412,GO:0006518,GO:0006725,GO:0006807,GO:0008150,GO:0008152,GO:0009058,GO:0009059,GO:0009987,GO:0010467,GO:0015935,GO:0016070,GO:0016072,GO:0019538,GO:0022613,GO:…		ko03010,map03010	M00178,M00179			br01610,ko00000,ko00001,ko00002,ko03011				Fungi	1GTIP@112252,39SD3@33154,3NYDK@4751,COG0103@1,KOG1697@2759	NA|NA|NA	J	Ribosomal protein S9/S16
MA-00141-1		ko:K02974	0.79332	0.90508	NoChange	Ribosomal protein S24e	78898.MVEG_05625T0	6.3e-38	163.3	Fungi incertae sedis	GO:0000462,GO:0002181,GO:0002182,GO:0003674,GO:0003735,GO:0005198,GO:0005575,GO:0005622,GO:0005623,GO:0005737,GO:0005739,GO:0005829,GO:0005840,GO:0006139,GO:0006364,GO:0006396,GO:0006412,GO:0006414,GO:0006518,GO:0006725,GO:0006807,GO:0008150,GO:0008152,GO:0009058,GO:0009059,GO:0009987,GO:0010467,GO:0015935,GO:0016070,GO:0016072,GO:0019538,GO:0022613,GO:0022626,GO:0022627,GO:0030490,GO:0032991,GO:…		ko03010,map03010	M00177,M00179			br01610,ko00000,ko00001,ko00002,ko03011				Fungi	1GTXK@112252,3A1MU@33154,3P333@4751,COG2004@1,KOG3424@2759	NA|NA|NA	J	Ribosomal protein S24e
MA-00073-247	RSM10	ko:K01867,ko:K02946	0.072436	0.51119	NoChange	Ribosomal protein S10p/S20e	78898.MVEG_07494T0	1e-96	360.1	Fungi incertae sedis	GO:0000313,GO:0000314,GO:0003674,GO:0003735,GO:0005198,GO:0005575,GO:0005622,GO:0005623,GO:0005737,GO:0005739,GO:0005759,GO:0005761,GO:0005763,GO:0005840,GO:0006412,GO:0006518,GO:0006807,GO:0008150,GO:0008152,GO:0009058,GO:0009059,GO:0009987,GO:0010467,GO:0015935,GO:0019538,GO:0031974,GO:0032543,GO:0032991,GO:0034641,GO:0034645,GO:0043043,GO:0043170,GO:0043226,GO:0043227,GO:0043228,GO:0043229,GO:…	6.1.1.2	ko00970,ko03010,map00970,map03010	M00178,M00179,M00359,M00360	R03664	RC00055,RC00523	br01610,ko00000,ko00001,ko00002,ko01000,ko01007,ko03011,ko03016				Fungi	1GU0D@112252,3A08V@33154,3P24D@4751,COG0051@1,KOG3321@2759	NA|NA|NA	J	Ribosomal protein S10p/S20e
MA-00090-186	MRPL8	ko:K02879	0.215	1.6533	NoChange	Ribosomal protein L17	78898.MVEG_08491T0	1.4e-75	289.3	Fungi incertae sedis	GO:0000002,GO:0000313,GO:0000315,GO:0003674,GO:0003735,GO:0005198,GO:0005575,GO:0005622,GO:0005623,GO:0005737,GO:0005739,GO:0005759,GO:0005761,GO:0005762,GO:0005840,GO:0006412,GO:0006518,GO:0006807,GO:0006996,GO:0007005,GO:0008150,GO:0008152,GO:0009058,GO:0009059,GO:0009987,GO:0010467,GO:0015934,GO:0016043,GO:0019538,GO:0031974,GO:0032543,GO:0032991,GO:0034641,GO:0034645,GO:0043043,GO:0043170,GO:…		ko03010,map03010	M00178			br01610,ko00000,ko00001,ko00002,ko03011				Fungi	1GTTF@112252,3A5T5@33154,3P1YY@4751,COG0203@1,KOG3280@2759	NA|NA|NA	J	Ribosomal protein L17
MA-00184-273	MRPL19	ko:K02867	0.11384	0.23922	NoChange	Ribosomal protein L11/L12	78898.MVEG_07058T0	5.2e-75	287	Fungi incertae sedis	GO:0000027,GO:0000313,GO:0000315,GO:0003674,GO:0003676,GO:0003723,GO:0003735,GO:0005198,GO:0005488,GO:0005575,GO:0005622,GO:0005623,GO:0005737,GO:0005739,GO:0005759,GO:0005761,GO:0005762,GO:0005840,GO:0006412,GO:0006518,GO:0006807,GO:0006996,GO:0008150,GO:0008152,GO:0009058,GO:0009059,GO:0009987,GO:0010467,GO:0015934,GO:0016043,GO:0019538,GO:0019843,GO:0022607,GO:0022613,GO:0022618,GO:0031974,GO:…		ko03010,map03010	M00178,M00179			br01610,ko00000,ko00001,ko00002,ko03011				Fungi	1GTWG@112252,3A3F4@33154,3P428@4751,COG0080@1,KOG3257@2759	NA|NA|NA	J	Ribosomal protein L11/L12
MA-00162-359	FMN1	ko:K00861	0.30889	1.6211	NoChange	Riboflavin kinase	78898.MVEG_07793T0	2e-74	285.4	Fungi incertae sedis	GO:0003674,GO:0003824,GO:0005488,GO:0005575,GO:0005622,GO:0005623,GO:0005737,GO:0005739,GO:0005740,GO:0005743,GO:0006139,GO:0006725,GO:0006732,GO:0006753,GO:0006766,GO:0006767,GO:0006771,GO:0006793,GO:0006796,GO:0006807,GO:0008150,GO:0008152,GO:0008270,GO:0008531,GO:0009058,GO:0009108,GO:0009110,GO:0009117,GO:0009123,GO:0009124,GO:0009156,GO:0009161,GO:0009165,GO:0009231,GO:0009259,GO:0009260,GO:…	2.7.1.26	ko00740,ko01100,ko01110,map00740,map01100,map01110	M00125	R00549	RC00002,RC00017	ko00000,ko00001,ko00002,ko01000				Fungi	1GWPZ@112252,3A3TG@33154,3P3XM@4751,COG0196@1,KOG3110@2759	NA|NA|NA	H	Riboflavin kinase
MA-00067-353	RIB7	ko:K14654	0.92325	0.9183	NoChange	RibD C-terminal domain	78898.MVEG_05411T0	3e-77	295	Fungi incertae sedis	GO:0000166,GO:0001522,GO:0003674,GO:0003824,GO:0005488,GO:0005515,GO:0005575,GO:0005622,GO:0005623,GO:0005737,GO:0005739,GO:0006139,GO:0006396,GO:0006399,GO:0006400,GO:0006725,GO:0006766,GO:0006767,GO:0006771,GO:0006807,GO:0008033,GO:0008150,GO:0008152,GO:0008703,GO:0009058,GO:0009110,GO:0009231,GO:0009451,GO:0009982,GO:0009987,GO:0010467,GO:0016070,GO:0016491,GO:0016614,GO:0016616,GO:0016853,GO:…	1.1.1.302	ko00740,ko01100,map00740,map01100		R09375,R09376	RC00933	ko00000,ko00001,ko01000			iMM904.YBR153W,iND750.YBR153W	Fungi	1GUMP@112252,2RZWZ@2759,38FM3@33154,3NX1M@4751,COG1985@1	NA|NA|NA	H	RibD C-terminal domain
MA-00067-380	RHO1	ko:K04513,ko:K07975	0.090479	1.7439	NoChange	Rho (Ras homology) subfamily of Ras-like small GTPases	78898.MVEG_11893T0	1.2e-106	392.5	Fungi incertae sedis	GO:0000003,GO:0000131,GO:0000148,GO:0000166,GO:0000271,GO:0000278,GO:0000281,GO:0000910,GO:0000935,GO:0001411,GO:0001882,GO:0001883,GO:0003674,GO:0003824,GO:0003924,GO:0005488,GO:0005525,GO:0005575,GO:0005622,GO:0005623,GO:0005737,GO:0005739,GO:0005740,GO:0005741,GO:0005777,GO:0005783,GO:0005794,GO:0005886,GO:0005933,GO:0005934,GO:0005935,GO:0005937,GO:0005975,GO:0005976,GO:0006073,GO:0006074,GO:…		ko04011,ko04014,ko04015,ko04022,ko04024,ko04062,ko04071,ko04072,ko04144,ko04150,ko04270,ko04310,ko04350,ko04360,ko04510,ko04520,ko04530,ko04611,ko04621,ko04660,ko04670,ko04722,ko04810,ko04921,ko04972,ko05100,ko05130,ko05133,ko05152,ko05200,ko05203,ko05205,ko05206,ko05210,ko05418,map04011,map04014,map04015,map04022,map04024,map04062,map04071,map04072,map04144,map04150,map04270,map04310,map04350,ma…				ko00000,ko00001,ko04031,ko04131,ko04147				Fungi	1GRTR@112252,38B7E@33154,3NV4I@4751,COG1100@1,KOG0393@2759	NA|NA|NA	U	Rho (Ras homology) subfamily of Ras-like small GTPases
MA-00210-55	YKT6	ko:K08516	0.71435	1.204	NoChange	Regulated-SNARE-like domain	78898.MVEG_05326T0	3e-94	351.3	Fungi incertae sedis	GO:0000149,GO:0000322,GO:0000323,GO:0000324,GO:0003674,GO:0003824,GO:0005484,GO:0005488,GO:0005515,GO:0005575,GO:0005622,GO:0005623,GO:0005737,GO:0005739,GO:0005768,GO:0005773,GO:0005794,GO:0005829,GO:0006810,GO:0006886,GO:0006887,GO:0006888,GO:0006891,GO:0006906,GO:0006996,GO:0007033,GO:0008104,GO:0008150,GO:0009987,GO:0012505,GO:0015031,GO:0015833,GO:0016020,GO:0016043,GO:0016050,GO:0016192,GO:…		ko04130,ko04138,map04130,map04138				ko00000,ko00001,ko04131				Fungi	1GTCA@112252,38SXN@33154,3NYFR@4751,COG5143@1,KOG0861@2759	NA|NA|NA	U	Regulated-SNARE-like domain
MA-00184-525	MGR2		0.62942	1.1464	NoChange	Reactive mitochondrial oxygen species modulator 1	78898.MVEG_06948T0	3.1e-32	144.4	Fungi incertae sedis	GO:0005575,GO:0005622,GO:0005623,GO:0005737,GO:0005739,GO:0005740,GO:0005743,GO:0005744,GO:0006605,GO:0006626,GO:0006810,GO:0006839,GO:0006886,GO:0006996,GO:0007005,GO:0007006,GO:0007007,GO:0008104,GO:0008150,GO:0009987,GO:0015031,GO:0015833,GO:0016020,GO:0016043,GO:0017038,GO:0019866,GO:0030150,GO:0031090,GO:0031966,GO:0031967,GO:0031975,GO:0032991,GO:0033036,GO:0033365,GO:0034613,GO:0042886,GO:…										Fungi	1GUTZ@112252,3A6QI@33154,3P5HI@4751,KOG4096@1,KOG4096@2759	NA|NA|NA	S	Reactive mitochondrial oxygen species modulator 1
MA-00072-102	TOR1	ko:K07203	0.12581	0.63852	NoChange	Rapamycin binding domain	78898.MVEG_11677T0	0	3130.5	Fungi incertae sedis	GO:0000003,GO:0000139,GO:0000228,GO:0000322,GO:0000323,GO:0000324,GO:0000329,GO:0000785,GO:0000790,GO:0001300,GO:0001558,GO:0003674,GO:0003824,GO:0004672,GO:0004674,GO:0005488,GO:0005515,GO:0005575,GO:0005622,GO:0005623,GO:0005634,GO:0005694,GO:0005737,GO:0005739,GO:0005768,GO:0005773,GO:0005774,GO:0005794,GO:0005886,GO:0006139,GO:0006259,GO:0006281,GO:0006351,GO:0006360,GO:0006412,GO:0006413,GO:…	2.7.11.1	ko01521,ko01522,ko04012,ko04066,ko04072,ko04136,ko04138,ko04139,ko04140,ko04150,ko04151,ko04152,ko04211,ko04212,ko04213,ko04218,ko04371,ko04630,ko04659,ko04714,ko04910,ko04919,ko04920,ko04930,ko04931,ko05165,ko05167,ko05200,ko05205,ko05206,ko05210,ko05212,ko05214,ko05215,ko05221,ko05224,ko05225,ko05226,ko05230,ko05231,map01521,map01522,map04012,map04066,map04072,map04136,map04138,map04139,map0414…				ko00000,ko00001,ko01000,ko01001,ko04131			iMM904.YKL203C,iND750.YKL203C	Fungi	1GT43@112252,38D67@33154,3NU9I@4751,COG5032@1,KOG0891@2759	NA|NA|NA	L	Rapamycin binding domain
MA-00073-167	TOR1	ko:K07203	0.095788	0.49128	NoChange	Rapamycin binding domain	78898.MVEG_10726T0	0	4333.1	Fungi incertae sedis	GO:0000003,GO:0000139,GO:0000228,GO:0000322,GO:0000323,GO:0000324,GO:0000329,GO:0000785,GO:0000790,GO:0001300,GO:0001558,GO:0003674,GO:0003824,GO:0004672,GO:0004674,GO:0005488,GO:0005515,GO:0005575,GO:0005622,GO:0005623,GO:0005634,GO:0005694,GO:0005737,GO:0005739,GO:0005768,GO:0005773,GO:0005774,GO:0005794,GO:0005886,GO:0006139,GO:0006259,GO:0006281,GO:0006351,GO:0006360,GO:0006412,GO:0006413,GO:…	2.7.11.1	ko01521,ko01522,ko04012,ko04066,ko04072,ko04136,ko04138,ko04139,ko04140,ko04150,ko04151,ko04152,ko04211,ko04212,ko04213,ko04218,ko04371,ko04630,ko04659,ko04714,ko04910,ko04919,ko04920,ko04930,ko04931,ko05165,ko05167,ko05200,ko05205,ko05206,ko05210,ko05212,ko05214,ko05215,ko05221,ko05224,ko05225,ko05226,ko05230,ko05231,map01521,map01522,map04012,map04066,map04072,map04136,map04138,map04139,map0414…				ko00000,ko00001,ko01000,ko01001,ko04131			iMM904.YKL203C,iND750.YKL203C	Fungi	1GT43@112252,38D67@33154,3NU9I@4751,COG5032@1,KOG0891@2759	NA|NA|NA	L	Rapamycin binding domain
MA-00334-382		ko:K07897	0.060313	1.504	NoChange	Rab subfamily of small GTPases	78898.MVEG_02819T0	3.3e-112	411	Fungi incertae sedis	GO:0000011,GO:0000322,GO:0000323,GO:0000324,GO:0000329,GO:0003674,GO:0003824,GO:0003924,GO:0005488,GO:0005515,GO:0005575,GO:0005622,GO:0005623,GO:0005737,GO:0005739,GO:0005740,GO:0005741,GO:0005773,GO:0005774,GO:0006810,GO:0006873,GO:0006885,GO:0006886,GO:0006892,GO:0006896,GO:0006897,GO:0006914,GO:0006996,GO:0007033,GO:0007034,GO:0007035,GO:0007154,GO:0007165,GO:0007264,GO:0008104,GO:0008150,GO:…		ko04137,ko04138,ko04140,ko04144,ko04145,ko05132,ko05146,ko05152,map04137,map04138,map04140,map04144,map04145,map05132,map05146,map05152				ko00000,ko00001,ko04031,ko04131,ko04147				Fungi	1GSAB@112252,38C61@33154,3NWMV@4751,KOG0394@1,KOG0394@2759	NA|NA|NA	U	Rab subfamily of small GTPases
MA-00210-67	VPS21	ko:K07889,ko:K07976	0.76265	1.2244	NoChange	Rab subfamily of small GTPases	78898.MVEG_02196T0	2.9e-97	361.7	Fungi incertae sedis	GO:0000011,GO:0003674,GO:0003824,GO:0003924,GO:0005575,GO:0005622,GO:0005623,GO:0005737,GO:0005739,GO:0005740,GO:0005741,GO:0005768,GO:0005769,GO:0005770,GO:0005886,GO:0006605,GO:0006623,GO:0006810,GO:0006886,GO:0006892,GO:0006895,GO:0006897,GO:0006914,GO:0006996,GO:0007032,GO:0007033,GO:0007034,GO:0008104,GO:0008150,GO:0008152,GO:0009056,GO:0009987,GO:0010256,GO:0012505,GO:0015031,GO:0015833,GO:…		ko04014,ko04144,ko04145,ko04962,ko05146,ko05152,map04014,map04144,map04145,map04962,map05146,map05152				ko00000,ko00001,ko04031,ko04131,ko04147				Fungi	1GVEE@112252,38HB3@33154,3NY6F@4751,KOG0092@1,KOG0092@2759	NA|NA|NA	U	Rab subfamily of small GTPases
MA-00153-459	YPT31	ko:K07904,ko:K07905	0.89871	1.0414	NoChange	Rab subfamily of small GTPases	78898.MVEG_02248T0	3.3e-107	394.4	Fungi incertae sedis	GO:0000003,GO:0000166,GO:0000212,GO:0000226,GO:0000278,GO:0000281,GO:0000910,GO:0000922,GO:0001882,GO:0001883,GO:0003674,GO:0003824,GO:0003924,GO:0005488,GO:0005525,GO:0005575,GO:0005622,GO:0005623,GO:0005628,GO:0005737,GO:0005739,GO:0005740,GO:0005741,GO:0005768,GO:0005794,GO:0005802,GO:0005819,GO:0005856,GO:0005933,GO:0005935,GO:0005938,GO:0006810,GO:0006886,GO:0006887,GO:0006996,GO:0007010,GO:…		ko04144,ko04152,ko04961,ko04962,ko04972,map04144,map04152,map04961,map04962,map04972				ko00000,ko00001,ko04031,ko04131,ko04147				Fungi	1GSWP@112252,38FAA@33154,3NV4U@4751,COG1100@1,KOG0087@2759	NA|NA|NA	U	Rab subfamily of small GTPases
MA-00055-1	SEC4	ko:K07901,ko:K18158	0.9533	1.0236	NoChange	Rab subfamily of small GTPases	78898.MVEG_11014T0	1.2e-106	392.5	Fungi incertae sedis	GO:0000003,GO:0000131,GO:0000166,GO:0000910,GO:0001411,GO:0001882,GO:0001883,GO:0002790,GO:0003006,GO:0003674,GO:0003824,GO:0003924,GO:0005488,GO:0005525,GO:0005575,GO:0005622,GO:0005623,GO:0005628,GO:0005737,GO:0005739,GO:0005740,GO:0005741,GO:0005768,GO:0005783,GO:0005815,GO:0005816,GO:0005856,GO:0005886,GO:0005933,GO:0005934,GO:0005935,GO:0005937,GO:0006810,GO:0006886,GO:0006887,GO:0006892,GO:…		ko04144,ko04152,ko04530,ko04972,map04144,map04152,map04530,map04972				ko00000,ko00001,ko03029,ko03036,ko04031,ko04131,ko04147				Fungi	1GSKF@112252,38GT3@33154,3NXRR@4751,KOG0078@1,KOG0078@2759	NA|NA|NA	U	Rab subfamily of small GTPases
MA-00153-271	PDB1	ko:K00162	0.42883	0.84338	NoChange	pyruvate dehydrogenase E1 component subunit beta	78898.MVEG_08706T0	3e-204	717.6	Fungi incertae sedis	GO:0003674,GO:0003824,GO:0004738,GO:0004739,GO:0005575,GO:0005622,GO:0005623,GO:0005737,GO:0005739,GO:0005759,GO:0005967,GO:0006082,GO:0006084,GO:0006085,GO:0006086,GO:0006090,GO:0006139,GO:0006163,GO:0006164,GO:0006637,GO:0006725,GO:0006732,GO:0006753,GO:0006790,GO:0006793,GO:0006796,GO:0006807,GO:0008150,GO:0008152,GO:0009058,GO:0009108,GO:0009117,GO:0009150,GO:0009152,GO:0009165,GO:0009259,GO:…	1.2.4.1	ko00010,ko00020,ko00620,ko01100,ko01110,ko01120,ko01130,ko01200,ko04066,ko04922,ko05230,map00010,map00020,map00620,map01100,map01110,map01120,map01130,map01200,map04066,map04922,map05230	M00307	R00014,R00209,R01699,R03270	RC00004,RC00027,RC00627,RC02742,RC02744,RC02882	br01601,ko00000,ko00001,ko00002,ko01000				Fungi	1GT8E@112252,38C5V@33154,3NU6T@4751,COG0022@1,KOG0524@2759	NA|NA|NA	C	pyruvate dehydrogenase E1 component subunit beta
MA-00297-451	CYS4	ko:K01697	0.67287	1.1592	NoChange	Pyridoxal-phosphate dependent enzyme	78898.MVEG_08270T0	3.6e-253	880.6	Fungi incertae sedis	GO:0000096,GO:0000097,GO:0003674,GO:0003676,GO:0003723,GO:0003729,GO:0003824,GO:0004122,GO:0005488,GO:0005575,GO:0005622,GO:0005623,GO:0005737,GO:0005739,GO:0006082,GO:0006520,GO:0006534,GO:0006535,GO:0006563,GO:0006790,GO:0006807,GO:0007089,GO:0007346,GO:0008144,GO:0008150,GO:0008152,GO:0008652,GO:0009058,GO:0009069,GO:0009070,GO:0009092,GO:0009403,GO:0009404,GO:0009987,GO:0010494,GO:0010564,GO:…	4.2.1.22	ko00260,ko00270,ko01100,ko01130,ko01230,map00260,map00270,map01100,map01130,map01230	M00035,M00338	R00891,R01290,R04942	RC00056,RC00069,RC00256,RC00489,RC01246	ko00000,ko00001,ko00002,ko01000				Fungi	1GSM1@112252,38B7H@33154,3NV6E@4751,COG0031@1,KOG1252@2759	NA|NA|NA	E	Pyridoxal-phosphate dependent enzyme
MA-00090-273	CYS4	ko:K01697	0.22595	0.69307	NoChange	Pyridoxal-phosphate dependent enzyme	78898.MVEG_03703T0	3.1e-265	920.6	Fungi incertae sedis	GO:0000096,GO:0000097,GO:0003674,GO:0003676,GO:0003723,GO:0003729,GO:0003824,GO:0004122,GO:0005488,GO:0005575,GO:0005622,GO:0005623,GO:0005737,GO:0005739,GO:0006082,GO:0006520,GO:0006534,GO:0006535,GO:0006563,GO:0006790,GO:0006807,GO:0007089,GO:0007346,GO:0008144,GO:0008150,GO:0008152,GO:0008652,GO:0009058,GO:0009069,GO:0009070,GO:0009092,GO:0009403,GO:0009404,GO:0009987,GO:0010494,GO:0010564,GO:…	4.2.1.22	ko00260,ko00270,ko01100,ko01130,ko01230,map00260,map00270,map01100,map01130,map01230	M00035,M00338	R00891,R01290,R04942	RC00056,RC00069,RC00256,RC00489,RC01246	ko00000,ko00001,ko00002,ko01000				Fungi	1GSM1@112252,38B7H@33154,3NV6E@4751,COG0031@1,KOG1252@2759	NA|NA|NA	E	Pyridoxal-phosphate dependent enzyme
MA-00173-21	LPD1	ko:K00382,ko:K17583	0.85641	1.0409	NoChange	Pyridine nucleotide-disulphide oxidoreductase, dimerisation domain	78898.MVEG_10319T0	3e-38	164.5	Fungi incertae sedis	GO:0001505,GO:0003674,GO:0003824,GO:0004148,GO:0004375,GO:0004591,GO:0004738,GO:0004739,GO:0005575,GO:0005622,GO:0005623,GO:0005737,GO:0005739,GO:0005759,GO:0005947,GO:0005960,GO:0005967,GO:0006082,GO:0006084,GO:0006085,GO:0006086,GO:0006090,GO:0006091,GO:0006103,GO:0006139,GO:0006163,GO:0006164,GO:0006520,GO:0006544,GO:0006546,GO:0006549,GO:0006550,GO:0006551,GO:0006552,GO:0006563,GO:0006564,GO:…	1.8.1.4	ko00010,ko00020,ko00260,ko00280,ko00620,ko00630,ko00640,ko01100,ko01110,ko01120,ko01130,ko01200,map00010,map00020,map00260,map00280,map00620,map00630,map00640,map01100,map01110,map01120,map01130,map01200	M00009,M00011,M00036,M00307,M00532	R00209,R01221,R01698,R03815,R07618,R08549	RC00004,RC00022,RC00583,RC02742,RC02833,RC02834	br01601,ko00000,ko00001,ko00002,ko01000,ko01009,ko04147				Fungi	1GWFE@112252,38CSR@33154,3NXXS@4751,COG1249@1,KOG1335@2759	NA|NA|NA	C	Pyridine nucleotide-disulphide oxidoreductase, dimerisation domain
MA-00173-20	LPD1	ko:K00382,ko:K17583	0.97036	0.9852	NoChange	Pyridine nucleotide-disulphide oxidoreductase, dimerisation domain	78898.MVEG_10319T0	1.5e-203	715.3	Fungi incertae sedis	GO:0001505,GO:0003674,GO:0003824,GO:0004148,GO:0004375,GO:0004591,GO:0004738,GO:0004739,GO:0005575,GO:0005622,GO:0005623,GO:0005737,GO:0005739,GO:0005759,GO:0005947,GO:0005960,GO:0005967,GO:0006082,GO:0006084,GO:0006085,GO:0006086,GO:0006090,GO:0006091,GO:0006103,GO:0006139,GO:0006163,GO:0006164,GO:0006520,GO:0006544,GO:0006546,GO:0006549,GO:0006550,GO:0006551,GO:0006552,GO:0006563,GO:0006564,GO:…	1.8.1.4	ko00010,ko00020,ko00260,ko00280,ko00620,ko00630,ko00640,ko01100,ko01110,ko01120,ko01130,ko01200,map00010,map00020,map00260,map00280,map00620,map00630,map00640,map01100,map01110,map01120,map01130,map01200	M00009,M00011,M00036,M00307,M00532	R00209,R01221,R01698,R03815,R07618,R08549	RC00004,RC00022,RC00583,RC02742,RC02833,RC02834	br01601,ko00000,ko00001,ko00002,ko01000,ko01009,ko04147				Fungi	1GWFE@112252,38CSR@33154,3NXXS@4751,COG1249@1,KOG1335@2759	NA|NA|NA	C	Pyridine nucleotide-disulphide oxidoreductase, dimerisation domain
MA-00067-65	GLR1	ko:K00383	0.69745	0.87101	NoChange	Pyridine nucleotide-disulphide oxidoreductase, dimerisation domain	78898.MVEG_09845T0	6.1e-239	833.2	Fungi incertae sedis	GO:0003674,GO:0003824,GO:0004362,GO:0005575,GO:0005622,GO:0005623,GO:0005634,GO:0005737,GO:0005739,GO:0005829,GO:0006464,GO:0006518,GO:0006575,GO:0006749,GO:0006790,GO:0006807,GO:0006950,GO:0006979,GO:0008150,GO:0008152,GO:0009636,GO:0009987,GO:0010731,GO:0015036,GO:0015037,GO:0015038,GO:0016209,GO:0016491,GO:0016651,GO:0016667,GO:0016668,GO:0019538,GO:0019725,GO:0033554,GO:0034599,GO:0034641,GO:…	1.8.1.7	ko00480,ko04918,map00480,map04918		R00094,R00115	RC00011	ko00000,ko00001,ko01000				Fungi	1GSMN@112252,39J8D@33154,3NVN5@4751,COG1249@1,KOG0405@2759	NA|NA|NA	Q	Pyridine nucleotide-disulphide oxidoreductase, dimerisation domain
MA-00139-41	NDE1	ko:K17871	0.10685	2.2406	NoChange	Pyridine nucleotide-disulphide oxidoreductase	78898.MVEG_10931T0	1.8e-247	861.7	Fungi incertae sedis	GO:0001300,GO:0003674,GO:0003824,GO:0003954,GO:0005575,GO:0005622,GO:0005623,GO:0005737,GO:0005739,GO:0005740,GO:0005743,GO:0005975,GO:0005996,GO:0006006,GO:0006066,GO:0006067,GO:0006082,GO:0006090,GO:0006091,GO:0006113,GO:0006116,GO:0006119,GO:0006139,GO:0006163,GO:0006725,GO:0006732,GO:0006733,GO:0006734,GO:0006753,GO:0006793,GO:0006796,GO:0006807,GO:0007568,GO:0007569,GO:0008137,GO:0008150,GO:…	1.6.5.9					ko00000,ko01000			iMM904.YMR145C,iND750.YMR145C	Fungi	1GT7X@112252,38G4F@33154,3NTXJ@4751,COG1252@1,KOG2495@2759	NA|NA|NA	C	Pyridine nucleotide-disulphide oxidoreductase
MA-00120-157	TRR1	ko:K00344,ko:K00384	0.89871	0.96919	NoChange	Pyridine nucleotide-disulphide oxidoreductase	78898.MVEG_08781T0	4e-176	624	Fungi incertae sedis	GO:0000302,GO:0000303,GO:0000305,GO:0003674,GO:0003824,GO:0004791,GO:0005488,GO:0005506,GO:0005575,GO:0005622,GO:0005623,GO:0005737,GO:0005739,GO:0005740,GO:0005758,GO:0005829,GO:0006801,GO:0006950,GO:0006979,GO:0008150,GO:0008152,GO:0008198,GO:0009636,GO:0009987,GO:0010035,GO:0015036,GO:0016209,GO:0016491,GO:0016651,GO:0016667,GO:0016668,GO:0019430,GO:0019725,GO:0031967,GO:0031970,GO:0031974,GO:…	1.6.5.5,1.8.1.9	ko00450,map00450		R02016,R03596,R09372	RC00013,RC02518,RC02873	ko00000,ko00001,ko01000				Fungi	1GSQX@112252,38I0K@33154,3NW0C@4751,COG0492@1,KOG0404@2759	NA|NA|NA	O	Pyridine nucleotide-disulphide oxidoreductase
MA-00067-303		ko:K22470	0.077038	0.61891	NoChange	Pyridine nucleotide-disulphide oxidoreductase	78898.MVEG_09829T0	9.5e-125	453	Fungi incertae sedis	GO:0000166,GO:0003674,GO:0003824,GO:0005488,GO:0005575,GO:0005622,GO:0005623,GO:0005737,GO:0005739,GO:0006518,GO:0006575,GO:0006749,GO:0006750,GO:0006790,GO:0006807,GO:0006873,GO:0006950,GO:0008150,GO:0008152,GO:0009058,GO:0009636,GO:0009987,GO:0010035,GO:0010038,GO:0016491,GO:0016667,GO:0016672,GO:0019184,GO:0019222,GO:0019725,GO:0019748,GO:0030002,GO:0030320,GO:0031323,GO:0034641,GO:0036094,GO:…	1.8.5.8	ko00920,map00920		R11929	RC02313	ko00000,ko00001,ko01000				Fungi	1GRRW@112252,38D4J@33154,3NWYC@4751,COG0446@1,KOG3851@2759	NA|NA|NA	C	Pyridine nucleotide-disulphide oxidoreductase
MA-00139-235			0.99807	1.0067	NoChange	PX-associated	78898.MVEG_04473T0	0	1183.7	Fungi incertae sedis	GO:0003674,GO:0003824,GO:0005488,GO:0005543,GO:0005575,GO:0005622,GO:0005623,GO:0005737,GO:0005739,GO:0006091,GO:0008150,GO:0008152,GO:0008289,GO:0009055,GO:0009061,GO:0009987,GO:0015980,GO:0016491,GO:0022900,GO:0035091,GO:0043167,GO:0043168,GO:0043226,GO:0043227,GO:0043229,GO:0043231,GO:0044237,GO:0044424,GO:0044444,GO:0044464,GO:0045333,GO:0055114										Fungi	1GSNE@112252,38EWR@33154,3NUW9@4751,COG5391@1,KOG2273@2759	NA|NA|NA	U	PX-associated
MA-00101-309			0.30494	0.50628	NoChange	PX-associated	78898.MVEG_04589T0	9.3e-292	1009.6	Fungi incertae sedis	GO:0003674,GO:0003824,GO:0005488,GO:0005543,GO:0005575,GO:0005622,GO:0005623,GO:0005737,GO:0005739,GO:0006091,GO:0008150,GO:0008152,GO:0008289,GO:0009055,GO:0009061,GO:0009987,GO:0015980,GO:0016491,GO:0022900,GO:0035091,GO:0043167,GO:0043168,GO:0043226,GO:0043227,GO:0043229,GO:0043231,GO:0044237,GO:0044424,GO:0044444,GO:0044464,GO:0045333,GO:0055114										Fungi	1GSNE@112252,38EWR@33154,3NUW9@4751,COG5391@1,KOG2273@2759	NA|NA|NA	U	PX-associated
MA-00213-64		ko:K10599	0.67332	0.76006	NoChange	Prp19/Pso4-like	78898.MVEG_05720T0	3.6e-205	721.1	Fungi incertae sedis	GO:0000209,GO:0000349,GO:0000375,GO:0000377,GO:0000393,GO:0000398,GO:0000974,GO:0003674,GO:0003824,GO:0004842,GO:0005575,GO:0005622,GO:0005623,GO:0005634,GO:0005681,GO:0005684,GO:0005737,GO:0005739,GO:0005829,GO:0006139,GO:0006396,GO:0006397,GO:0006464,GO:0006725,GO:0006807,GO:0008150,GO:0008152,GO:0008380,GO:0009987,GO:0010467,GO:0016043,GO:0016070,GO:0016071,GO:0016567,GO:0016740,GO:0019538,GO:…	2.3.2.27	ko03040,ko04120,map03040,map04120	M00353,M00355			ko00000,ko00001,ko00002,ko01000,ko03041,ko03400,ko04121				Fungi	1GT8H@112252,38CRU@33154,3NV8G@4751,KOG0289@1,KOG0289@2759	NA|NA|NA	S	Prp19/Pso4-like
MA-00182-69	RNR1	ko:K10807	0.20975	1.434	NoChange	Provides the precursors necessary for DNA synthesis. Catalyzes the biosynthesis of deoxyribonucleotides from the corresponding ribonucleotides	78898.MVEG_08620T0	0	1506.9	Fungi incertae sedis	GO:0000166,GO:0003674,GO:0003824,GO:0004550,GO:0004748,GO:0005488,GO:0005524,GO:0005575,GO:0005622,GO:0005623,GO:0005634,GO:0005737,GO:0005739,GO:0005829,GO:0005971,GO:0006139,GO:0006165,GO:0006213,GO:0006220,GO:0006221,GO:0006235,GO:0006240,GO:0006725,GO:0006753,GO:0006793,GO:0006796,GO:0006807,GO:0008144,GO:0008150,GO:0008152,GO:0009058,GO:0009116,GO:0009117,GO:0009119,GO:0009132,GO:0009133,GO:…	1.17.4.1	ko00230,ko00240,ko00480,ko00983,ko01100,map00230,map00240,map00480,map00983,map01100	M00053	R02017,R02019,R02024,R08363,R08364,R11893	RC00613,RC01003	ko00000,ko00001,ko00002,ko01000,ko03400				Fungi	1GT1U@112252,38B81@33154,3NWE4@4751,COG0209@1,KOG1112@2759	NA|NA|NA	F	Provides the precursors necessary for DNA synthesis. Catalyzes the biosynthesis of deoxyribonucleotides from the corresponding ribonucleotides
MA-00120-138	RNR1	ko:K10807	0.65074	1.2732	NoChange	Provides the precursors necessary for DNA synthesis. Catalyzes the biosynthesis of deoxyribonucleotides from the corresponding ribonucleotides	78898.MVEG_08620T0	0	1412.5	Fungi incertae sedis	GO:0000166,GO:0003674,GO:0003824,GO:0004550,GO:0004748,GO:0005488,GO:0005524,GO:0005575,GO:0005622,GO:0005623,GO:0005634,GO:0005737,GO:0005739,GO:0005829,GO:0005971,GO:0006139,GO:0006165,GO:0006213,GO:0006220,GO:0006221,GO:0006235,GO:0006240,GO:0006725,GO:0006753,GO:0006793,GO:0006796,GO:0006807,GO:0008144,GO:0008150,GO:0008152,GO:0009058,GO:0009116,GO:0009117,GO:0009119,GO:0009132,GO:0009133,GO:…	1.17.4.1	ko00230,ko00240,ko00480,ko00983,ko01100,map00230,map00240,map00480,map00983,map01100	M00053	R02017,R02019,R02024,R08363,R08364,R11893	RC00613,RC01003	ko00000,ko00001,ko00002,ko01000,ko03400				Fungi	1GT1U@112252,38B81@33154,3NWE4@4751,COG0209@1,KOG1112@2759	NA|NA|NA	F	Provides the precursors necessary for DNA synthesis. Catalyzes the biosynthesis of deoxyribonucleotides from the corresponding ribonucleotides
MA-00153-141	SAT4	ko:K00924,ko:K08286	0.26472	2.0491	NoChange	Protein tyrosine kinase	78898.MVEG_09578T0	1.3e-183	649.8	Fungi incertae sedis	GO:0000082,GO:0000166,GO:0000278,GO:0003674,GO:0003824,GO:0004672,GO:0004674,GO:0005488,GO:0005524,GO:0005575,GO:0005622,GO:0005623,GO:0005634,GO:0005737,GO:0005739,GO:0006464,GO:0006468,GO:0006470,GO:0006793,GO:0006796,GO:0006807,GO:0006873,GO:0006875,GO:0007049,GO:0007154,GO:0007165,GO:0008104,GO:0008144,GO:0008150,GO:0008152,GO:0009249,GO:0009987,GO:0010467,GO:0016301,GO:0016310,GO:0016311,GO:…						ko00000,ko01000				Fungi	1GVWA@112252,38GAY@33154,3NV7I@4751,KOG0590@1,KOG0590@2759	NA|NA|NA	T	Protein tyrosine kinase
MA-00101-326	PIB2		0.83311	0.93894	NoChange	Protein present in Fab1, YOTB, Vac1, and EEA1	78898.MVEG_00021T0	1.7e-54	219.9	Fungi incertae sedis	GO:0000285,GO:0000322,GO:0000323,GO:0000324,GO:0000329,GO:0003674,GO:0003824,GO:0005488,GO:0005543,GO:0005575,GO:0005622,GO:0005623,GO:0005737,GO:0005739,GO:0005768,GO:0005773,GO:0005774,GO:0006464,GO:0006629,GO:0006644,GO:0006650,GO:0006793,GO:0006796,GO:0006807,GO:0006810,GO:0008150,GO:0008152,GO:0008289,GO:0009987,GO:0010008,GO:0012505,GO:0016020,GO:0016192,GO:0016197,GO:0016301,GO:0016307,GO:…										Fungi	1GXE5@112252,39SY0@33154,3NXGB@4751,KOG1729@1,KOG1729@2759	NA|NA|NA	S	Protein present in Fab1, YOTB, Vac1, and EEA1
MA-00206-30	YCK2	ko:K02218	0.27256	0.64441	NoChange	Protein kinase domain	78898.MVEG_04161T0	5.6e-183	647.1	Fungi incertae sedis	GO:0000166,GO:0000287,GO:0000322,GO:0000323,GO:0000324,GO:0000902,GO:0001678,GO:0003674,GO:0003824,GO:0004672,GO:0004674,GO:0004713,GO:0005488,GO:0005524,GO:0005575,GO:0005622,GO:0005623,GO:0005634,GO:0005737,GO:0005739,GO:0005773,GO:0005783,GO:0005886,GO:0005933,GO:0005935,GO:0005937,GO:0006464,GO:0006468,GO:0006793,GO:0006796,GO:0006807,GO:0006810,GO:0006897,GO:0007154,GO:0007165,GO:0008144,GO:…	2.7.11.1	ko04011,ko04392,map04011,map04392				ko00000,ko00001,ko01000,ko01001				Fungi	1GWAT@112252,38BTT@33154,3NV9M@4751,KOG1164@1,KOG1165@2759	NA|NA|NA	T	Protein kinase domain
MA-00334-70	SCL1	ko:K02730	0.83395	1.0536	NoChange	Proteasome subunit A N-terminal signature Add an annotation	78898.MVEG_11996T0	8.6e-128	463	Fungi incertae sedis	GO:0000502,GO:0005575,GO:0005622,GO:0005623,GO:0005634,GO:0005737,GO:0005739,GO:0005829,GO:0005839,GO:0006508,GO:0006511,GO:0006807,GO:0007088,GO:0007346,GO:0008150,GO:0008152,GO:0009056,GO:0009057,GO:0009896,GO:0009987,GO:0010498,GO:0010499,GO:0010564,GO:0010638,GO:0010965,GO:0012505,GO:0016020,GO:0019538,GO:0019773,GO:0019941,GO:0030071,GO:0030163,GO:0031331,GO:0031597,GO:0032270,GO:0032436,GO:…	3.4.25.1	ko03050,map03050	M00337,M00340			ko00000,ko00001,ko00002,ko01000,ko01002,ko03051				Fungi	1GSQG@112252,38C7B@33154,3NUBK@4751,COG0638@1,KOG0182@2759	NA|NA|NA	O	Proteasome subunit A N-terminal signature Add an annotation
MA-00153-605	PRE6	ko:K02731	0.88265	0.95193	NoChange	Proteasome subunit A N-terminal signature Add an annotation	78898.MVEG_07495T0	1.4e-117	429.1	Fungi incertae sedis	GO:0000502,GO:0005575,GO:0005622,GO:0005623,GO:0005634,GO:0005737,GO:0005739,GO:0005829,GO:0005839,GO:0006508,GO:0006511,GO:0006807,GO:0007088,GO:0007346,GO:0008150,GO:0008152,GO:0009056,GO:0009057,GO:0009896,GO:0009987,GO:0010498,GO:0010499,GO:0010564,GO:0010638,GO:0010965,GO:0012505,GO:0016020,GO:0019538,GO:0019773,GO:0019941,GO:0030071,GO:0030163,GO:0031331,GO:0031597,GO:0031974,GO:0031981,GO:…	3.4.25.1	ko03050,map03050	M00337,M00340			ko00000,ko00001,ko00002,ko01000,ko01002,ko03051,ko04131				Fungi	1GRSR@112252,38CHW@33154,3NWE5@4751,COG0638@1,KOG0183@2759	NA|NA|NA	O	Proteasome subunit A N-terminal signature Add an annotation
MA-00162-286	PHB2	ko:K17081	0.23119	0.74524	NoChange	prohibitin homologues	78898.MVEG_00558T0	2.5e-145	521.5	Fungi incertae sedis	GO:0000001,GO:0001302,GO:0005575,GO:0005622,GO:0005623,GO:0005737,GO:0005739,GO:0005740,GO:0005743,GO:0006457,GO:0006996,GO:0007005,GO:0007568,GO:0007569,GO:0008150,GO:0009892,GO:0009987,GO:0010605,GO:0016020,GO:0016043,GO:0019222,GO:0019866,GO:0030162,GO:0031090,GO:0031323,GO:0031324,GO:0031966,GO:0031967,GO:0031975,GO:0032268,GO:0032269,GO:0032502,GO:0043226,GO:0043227,GO:0043229,GO:0043231,GO:…						ko00000,ko03029,ko04147				Fungi	1GVK8@112252,38CCG@33154,3NVK6@4751,COG0330@1,KOG3090@2759	NA|NA|NA	O	prohibitin homologues
MA-00153-520	PHB1	ko:K17080	0.0574	0.56223	NoChange	prohibitin homologues	78898.MVEG_00176T0	1.1e-136	492.7	Fungi incertae sedis	GO:0000001,GO:0001302,GO:0005575,GO:0005622,GO:0005623,GO:0005737,GO:0005739,GO:0005740,GO:0005743,GO:0006457,GO:0006996,GO:0007005,GO:0007006,GO:0007007,GO:0007568,GO:0007569,GO:0008150,GO:0009653,GO:0009892,GO:0009987,GO:0010605,GO:0016020,GO:0016043,GO:0019222,GO:0019866,GO:0030162,GO:0031090,GO:0031323,GO:0031324,GO:0031966,GO:0031967,GO:0031975,GO:0032268,GO:0032269,GO:0032502,GO:0032989,GO:…						ko00000,ko03029,ko04147				Fungi	1GSUG@112252,38DP2@33154,3NW8M@4751,COG0330@1,KOG3083@2759	NA|NA|NA	O	prohibitin homologues
MA-00072-233	PHB1	ko:K17080	0.054673	0.36667	NoChange	prohibitin homologues	78898.MVEG_00176T0	2.7e-138	498	Fungi incertae sedis	GO:0000001,GO:0001302,GO:0005575,GO:0005622,GO:0005623,GO:0005737,GO:0005739,GO:0005740,GO:0005743,GO:0006457,GO:0006996,GO:0007005,GO:0007006,GO:0007007,GO:0007568,GO:0007569,GO:0008150,GO:0009653,GO:0009892,GO:0009987,GO:0010605,GO:0016020,GO:0016043,GO:0019222,GO:0019866,GO:0030162,GO:0031090,GO:0031323,GO:0031324,GO:0031966,GO:0031967,GO:0031975,GO:0032268,GO:0032269,GO:0032502,GO:0032989,GO:…						ko00000,ko03029,ko04147				Fungi	1GSUG@112252,38DP2@33154,3NW8M@4751,COG0330@1,KOG3083@2759	NA|NA|NA	O	prohibitin homologues
MA-00112-246	ATP1	ko:K02132	0.015053	0.50907	NoChange	Produces ATP from ADP in the presence of a proton gradient across the membrane	78898.MVEG_05628T0	1.6e-302	1044.6	Fungi incertae sedis	GO:0000166,GO:0000275,GO:0003674,GO:0005488,GO:0005524,GO:0005575,GO:0005622,GO:0005623,GO:0005737,GO:0005739,GO:0005740,GO:0005743,GO:0005753,GO:0005754,GO:0005759,GO:0006091,GO:0006119,GO:0006139,GO:0006163,GO:0006164,GO:0006725,GO:0006753,GO:0006754,GO:0006793,GO:0006796,GO:0006807,GO:0006810,GO:0006811,GO:0006812,GO:0006839,GO:0008144,GO:0008150,GO:0008152,GO:0009058,GO:0009117,GO:0009123,GO:…		ko00190,ko01100,ko04714,ko05010,ko05012,ko05016,map00190,map01100,map04714,map05010,map05012,map05016	M00158			ko00000,ko00001,ko00002	3.A.2.1		iMM904.YBL099W,iND750.YBL099W	Fungi	1GT2Z@112252,38ERH@33154,3NUHW@4751,COG0056@1,KOG1353@2759	NA|NA|NA	C	Produces ATP from ADP in the presence of a proton gradient across the membrane
MA-00323-146	CCA1	ko:K00974	0.86847	0.92939	NoChange	Poly A polymerase head domain	78898.MVEG_01410T0	2.7e-252	877.9	Fungi incertae sedis	GO:0001680,GO:0003674,GO:0003824,GO:0004652,GO:0004810,GO:0005575,GO:0005622,GO:0005623,GO:0005634,GO:0005737,GO:0005739,GO:0005759,GO:0006139,GO:0006396,GO:0006399,GO:0006725,GO:0006807,GO:0008033,GO:0008150,GO:0008152,GO:0009987,GO:0010467,GO:0016070,GO:0016740,GO:0016772,GO:0016779,GO:0031123,GO:0031974,GO:0034470,GO:0034641,GO:0034660,GO:0042780,GO:0043170,GO:0043226,GO:0043227,GO:0043229,GO:…	2.7.7.72	ko03013,map03013		R09382,R09383,R09384,R09386	RC00078	ko00000,ko00001,ko01000,ko03016				Fungi	1GSI9@112252,38BGG@33154,3NU7R@4751,COG0617@1,KOG2159@2759	NA|NA|NA	J	Poly A polymerase head domain
MA-00162-153	BEM1	ko:K11237	0.21355	1.8075	NoChange	PhoX homologous domain, present in p47phox and p40phox.	78898.MVEG_00513T0	1.4e-202	713	Fungi incertae sedis	GO:0000003,GO:0000131,GO:0000746,GO:0000747,GO:0000753,GO:0000767,GO:0000902,GO:0003006,GO:0003674,GO:0005198,GO:0005488,GO:0005515,GO:0005543,GO:0005575,GO:0005622,GO:0005623,GO:0005737,GO:0005739,GO:0005933,GO:0005934,GO:0005935,GO:0005937,GO:0005938,GO:0007154,GO:0007163,GO:0007165,GO:0007264,GO:0007265,GO:0007266,GO:0008150,GO:0008289,GO:0008360,GO:0009653,GO:0009987,GO:0016043,GO:0019953,GO:…		ko04011,map04011				ko00000,ko00001				Fungi	1GTAT@112252,39GME@33154,3NU89@4751,KOG4773@1,KOG4773@2759	NA|NA|NA	T	PhoX homologous domain, present in p47phox and p40phox.
MA-00189-280	BEM1	ko:K11237	0.22656	0.44534	NoChange	PhoX homologous domain, present in p47phox and p40phox.	78898.MVEG_00513T0	1.2e-206	726.5	Fungi incertae sedis	GO:0000003,GO:0000131,GO:0000746,GO:0000747,GO:0000753,GO:0000767,GO:0000902,GO:0003006,GO:0003674,GO:0005198,GO:0005488,GO:0005515,GO:0005543,GO:0005575,GO:0005622,GO:0005623,GO:0005737,GO:0005739,GO:0005933,GO:0005934,GO:0005935,GO:0005937,GO:0005938,GO:0007154,GO:0007163,GO:0007165,GO:0007264,GO:0007265,GO:0007266,GO:0008150,GO:0008289,GO:0008360,GO:0009653,GO:0009987,GO:0016043,GO:0019953,GO:…		ko04011,map04011				ko00000,ko00001				Fungi	1GTAT@112252,39GME@33154,3NU89@4751,KOG4773@1,KOG4773@2759	NA|NA|NA	T	PhoX homologous domain, present in p47phox and p40phox.
MA-00090-284	STT4	ko:K00888	0.89192	0.90037	NoChange	Phosphoinositide 3-kinase family, accessory domain (PIK domain)	78898.MVEG_08250T0	0	3201	Fungi incertae sedis	GO:0000278,GO:0000281,GO:0000422,GO:0000910,GO:0003674,GO:0003824,GO:0004430,GO:0005575,GO:0005622,GO:0005623,GO:0005737,GO:0005739,GO:0005886,GO:0006629,GO:0006644,GO:0006646,GO:0006650,GO:0006793,GO:0006796,GO:0006914,GO:0006996,GO:0007005,GO:0007010,GO:0007016,GO:0007049,GO:0007154,GO:0007165,GO:0008104,GO:0008150,GO:0008152,GO:0008610,GO:0008654,GO:0009056,GO:0009058,GO:0009987,GO:0016020,GO:…	2.7.1.67	ko00562,ko01100,ko04011,ko04070,map00562,map01100,map04011,map04070	M00130	R03361	RC00002,RC00078	ko00000,ko00001,ko00002,ko01000,ko04131				Fungi	1GVEN@112252,38C4G@33154,3NUX7@4751,COG5032@1,KOG0902@2759	NA|NA|NA	T	Phosphoinositide 3-kinase family, accessory domain (PIK domain)
MA-00210-246	PGK1	ko:K00927	0.97036	1.0134	NoChange	Phosphoglycerate kinase	78898.MVEG_05157T0	4.8e-211	740.3	Fungi incertae sedis	GO:0000166,GO:0003674,GO:0003824,GO:0004618,GO:0005488,GO:0005524,GO:0005575,GO:0005622,GO:0005623,GO:0005737,GO:0005739,GO:0005829,GO:0005886,GO:0005975,GO:0005996,GO:0006006,GO:0006007,GO:0006082,GO:0006090,GO:0006091,GO:0006094,GO:0006096,GO:0006139,GO:0006163,GO:0006164,GO:0006165,GO:0006725,GO:0006732,GO:0006733,GO:0006734,GO:0006735,GO:0006753,GO:0006754,GO:0006757,GO:0006793,GO:0006796,GO:…	2.7.2.3	ko00010,ko00710,ko01100,ko01110,ko01120,ko01130,ko01200,ko01230,map00010,map00710,map01100,map01110,map01120,map01130,map01200,map01230	M00001,M00002,M00003,M00165,M00166,M00308,M00552	R01512	RC00002,RC00043	ko00000,ko00001,ko00002,ko01000,ko04147				Fungi	1GT5N@112252,38EF9@33154,3NVNN@4751,COG0126@1,KOG1367@2759	NA|NA|NA	G	Phosphoglycerate kinase
MA-00184-44	PGI1	ko:K01810	0.31645	1.083	NoChange	Phosphoglucose isomerase	78898.MVEG_07525T0	2.1e-307	1060.8	Fungi incertae sedis	GO:0003674,GO:0003824,GO:0004347,GO:0005575,GO:0005576,GO:0005622,GO:0005623,GO:0005737,GO:0005739,GO:0005829,GO:0005886,GO:0005975,GO:0005996,GO:0006006,GO:0006007,GO:0006081,GO:0006082,GO:0006090,GO:0006091,GO:0006094,GO:0006096,GO:0006098,GO:0006139,GO:0006163,GO:0006164,GO:0006165,GO:0006725,GO:0006732,GO:0006733,GO:0006734,GO:0006735,GO:0006739,GO:0006753,GO:0006754,GO:0006757,GO:0006793,GO:…	5.3.1.9	ko00010,ko00030,ko00500,ko00520,ko01100,ko01110,ko01120,ko01130,ko01200,map00010,map00030,map00500,map00520,map01100,map01110,map01120,map01130,map01200	M00001,M00004,M00114	R02739,R02740,R03321	RC00376,RC00563	ko00000,ko00001,ko00002,ko01000,ko04147				Fungi	1GT3S@112252,38EWT@33154,3NW61@4751,COG0166@1,KOG2446@2759	NA|NA|NA	G	Phosphoglucose isomerase
MA-00153-521	PHO88		0.77804	1.2198	NoChange	Phosphate transport (Pho88)	78898.MVEG_02688T0	5.7e-77	293.9	Fungi incertae sedis	GO:0005575,GO:0005622,GO:0005623,GO:0005737,GO:0005739,GO:0005783,GO:0005789,GO:0006605,GO:0006807,GO:0006810,GO:0006811,GO:0006817,GO:0006820,GO:0006886,GO:0006996,GO:0007029,GO:0008104,GO:0008150,GO:0008152,GO:0009987,GO:0010256,GO:0010467,GO:0012505,GO:0015031,GO:0015698,GO:0015833,GO:0016020,GO:0016021,GO:0016043,GO:0019538,GO:0030176,GO:0031224,GO:0031227,GO:0031984,GO:0033036,GO:0033365,GO:…										Fungi	1GW91@112252,39SHB@33154,3P02T@4751,COG5065@1,KOG4554@2759	NA|NA|NA	P	Phosphate transport (Pho88)
MA-00173-136	CCP1	ko:K00428	0.79755	1.0554	NoChange	Peroxidase	78898.MVEG_11388T0	1.7e-135	489.2	Fungi incertae sedis	GO:0000302,GO:0003674,GO:0003824,GO:0004130,GO:0004601,GO:0005575,GO:0005622,GO:0005623,GO:0005737,GO:0005739,GO:0005740,GO:0005758,GO:0006950,GO:0006979,GO:0008150,GO:0008152,GO:0009056,GO:0009636,GO:0009987,GO:0016209,GO:0016491,GO:0016684,GO:0016999,GO:0017001,GO:0017144,GO:0031967,GO:0031970,GO:0031974,GO:0031975,GO:0033554,GO:0034599,GO:0042221,GO:0042737,GO:0042743,GO:0042744,GO:0043226,GO:…	1.11.1.5					ko00000,ko01000				Fungi	1GSN2@112252,2QR1E@2759,38E3T@33154,3NW1F@4751,COG0685@1	NA|NA|NA	E	Peroxidase
MA-00326-132	CYM1	ko:K06972	0.88688	0.9243	NoChange	Peptidase M16C associated	78898.MVEG_05911T0	0	1757.7	Fungi incertae sedis	GO:0003674,GO:0003824,GO:0004175,GO:0004222,GO:0005575,GO:0005622,GO:0005623,GO:0005737,GO:0005739,GO:0005740,GO:0005758,GO:0006508,GO:0006605,GO:0006626,GO:0006627,GO:0006807,GO:0006810,GO:0006839,GO:0006886,GO:0006996,GO:0007005,GO:0008104,GO:0008150,GO:0008152,GO:0008233,GO:0008237,GO:0009056,GO:0009057,GO:0009987,GO:0010033,GO:0010467,GO:0015031,GO:0015833,GO:0016043,GO:0016485,GO:0016787,GO:…						ko00000,ko01000,ko01002				Fungi	1GSXI@112252,38B5A@33154,3NU36@4751,COG1026@1,KOG2019@2759	NA|NA|NA	O	Peptidase M16C associated
MA-00210-301	QCR2	ko:K00415	0.0063633	0.51438	NoChange	Peptidase M16 inactive domain	78898.MVEG_05212T0	1.5e-199	702.2	Fungi incertae sedis	GO:0003674,GO:0003824,GO:0004175,GO:0004222,GO:0005198,GO:0005488,GO:0005575,GO:0005622,GO:0005623,GO:0005737,GO:0005739,GO:0005740,GO:0005743,GO:0005746,GO:0005750,GO:0005886,GO:0006091,GO:0006119,GO:0006122,GO:0006139,GO:0006163,GO:0006508,GO:0006725,GO:0006753,GO:0006793,GO:0006796,GO:0006807,GO:0008150,GO:0008152,GO:0008233,GO:0008237,GO:0008270,GO:0009060,GO:0009117,GO:0009123,GO:0009126,GO:…		ko00190,ko01100,ko04260,ko04714,ko04932,ko05010,ko05012,ko05016,map00190,map01100,map04260,map04714,map04932,map05010,map05012,map05016	M00152			ko00000,ko00001,ko00002,ko01002				Fungi	1GSC9@112252,38G11@33154,3NXHG@4751,COG0612@1,KOG2583@2759	NA|NA|NA	C	Peptidase M16 inactive domain
MA-00101-8	YME1	ko:K08955	0.35697	0.67037	NoChange	Peptidase family M41	78898.MVEG_06147T0	0	1194.9	Fungi incertae sedis	GO:0003674,GO:0003824,GO:0004176,GO:0005575,GO:0005622,GO:0005623,GO:0005737,GO:0005739,GO:0005740,GO:0005743,GO:0006457,GO:0006508,GO:0006515,GO:0006605,GO:0006626,GO:0006807,GO:0006810,GO:0006839,GO:0006886,GO:0006996,GO:0007005,GO:0008104,GO:0008150,GO:0008152,GO:0008233,GO:0008237,GO:0009056,GO:0009057,GO:0009987,GO:0010467,GO:0015031,GO:0015833,GO:0016020,GO:0016043,GO:0016462,GO:0016787,GO:…		ko04139,map04139				ko00000,ko00001,ko01000,ko01002				Fungi	1GSGJ@112252,38BJT@33154,3NUU2@4751,COG0465@1,KOG0734@2759	NA|NA|NA	O	Peptidase family M41
MA-00162-337	PRD1	ko:K01405,ko:K13726	0.23045	0.64165	NoChange	Peptidase family M3	78898.MVEG_11471T0	3.4e-270	937.6	Fungi incertae sedis	GO:0000322,GO:0000323,GO:0000324,GO:0003674,GO:0003824,GO:0004175,GO:0004222,GO:0005575,GO:0005622,GO:0005623,GO:0005737,GO:0005739,GO:0005740,GO:0005758,GO:0005773,GO:0005794,GO:0006508,GO:0006518,GO:0006807,GO:0008150,GO:0008152,GO:0008233,GO:0008237,GO:0009987,GO:0012505,GO:0016787,GO:0019538,GO:0031967,GO:0031970,GO:0031974,GO:0031975,GO:0034641,GO:0043170,GO:0043226,GO:0043227,GO:0043229,GO:…	3.4.24.37					ko00000,ko01000,ko01002				Fungi	1GS81@112252,38SFI@33154,3NX1E@4751,COG0339@1,KOG2089@2759	NA|NA|NA	O	Peptidase family M3
MA-00182-118	dug1	ko:K15428	0.4222	0.89718	NoChange	Peptidase dimerisation domain	78898.MVEG_09362T0	2.3e-270	937.6	Fungi incertae sedis	GO:0003674,GO:0003824,GO:0005575,GO:0005576,GO:0005622,GO:0005623,GO:0005737,GO:0005739,GO:0006508,GO:0006518,GO:0006575,GO:0006749,GO:0006751,GO:0006790,GO:0006807,GO:0008150,GO:0008152,GO:0008233,GO:0008235,GO:0008237,GO:0008238,GO:0008242,GO:0009056,GO:0009987,GO:0016787,GO:0016805,GO:0019538,GO:0031012,GO:0034641,GO:0042219,GO:0043170,GO:0043171,GO:0043226,GO:0043227,GO:0043229,GO:0043231,GO:…		ko00480,ko01100,map00480,map01100		R00899,R04951	RC00096,RC00141	ko00000,ko00001,ko01000,ko01002				Fungi	1GS2P@112252,38D4S@33154,3NVKQ@4751,COG0624@1,KOG2276@2759	NA|NA|NA	E	Peptidase dimerisation domain
MA-00112-310	CBR1	ko:K00326	0.047373	0.61544	NoChange	Oxidoreductase FAD-binding domain	78898.MVEG_00730T0	2.3e-146	525	Fungi incertae sedis	GO:0000166,GO:0002097,GO:0002098,GO:0003674,GO:0003824,GO:0004128,GO:0005488,GO:0005575,GO:0005622,GO:0005623,GO:0005634,GO:0005737,GO:0005739,GO:0005740,GO:0005741,GO:0005783,GO:0005886,GO:0006091,GO:0006139,GO:0006396,GO:0006399,GO:0006400,GO:0006725,GO:0006807,GO:0008033,GO:0008150,GO:0008152,GO:0009451,GO:0009987,GO:0010467,GO:0012505,GO:0016020,GO:0016070,GO:0016491,GO:0016651,GO:0016653,GO:…	1.6.2.2	ko00520,map00520		R00100		ko00000,ko00001,ko01000			iMM904.YIL043C	Fungi	1GS3R@112252,38GQ8@33154,3NW9T@4751,COG0543@1,KOG0534@2759	NA|NA|NA	CH	Oxidoreductase FAD-binding domain
MA-00268-155			0.30889	1.2918	NoChange	Outer membrane protein TOM13	78898.MVEG_04552T0	3.7e-45	188.3	Fungi incertae sedis	GO:0005575,GO:0005622,GO:0005623,GO:0005737,GO:0005739,GO:0005740,GO:0005741,GO:0006605,GO:0006626,GO:0006810,GO:0006839,GO:0006886,GO:0006996,GO:0007005,GO:0007006,GO:0007008,GO:0008104,GO:0008150,GO:0009987,GO:0015031,GO:0015833,GO:0016020,GO:0016021,GO:0016043,GO:0017038,GO:0019867,GO:0022607,GO:0031090,GO:0031224,GO:0031300,GO:0031301,GO:0031306,GO:0031307,GO:0031966,GO:0031967,GO:0031968,GO:…										Fungi	1GUST@112252,2E4MV@1,2SBHA@2759,3A62J@33154,3P53A@4751	NA|NA|NA	S	Outer membrane protein TOM13
MA-00153-498	CAT1	ko:K03781	0.8205	1.0748	NoChange	Occurs in almost all aerobically respiring organisms and serves to protect cells from the toxic effects of hydrogen peroxide	78898.MVEG_04764T0	2.6e-277	960.7	Fungi incertae sedis	GO:0000302,GO:0001306,GO:0001315,GO:0003674,GO:0003824,GO:0004096,GO:0004601,GO:0005488,GO:0005575,GO:0005618,GO:0005622,GO:0005623,GO:0005737,GO:0005739,GO:0005759,GO:0005777,GO:0005782,GO:0006950,GO:0006970,GO:0006979,GO:0007154,GO:0007568,GO:0007571,GO:0008150,GO:0008152,GO:0009056,GO:0009267,GO:0009277,GO:0009405,GO:0009605,GO:0009628,GO:0009636,GO:0009651,GO:0009987,GO:0009991,GO:0010035,GO:…	1.11.1.6	ko00380,ko00630,ko01110,ko01130,ko01200,ko04011,ko04016,ko04068,ko04146,ko04211,ko04212,ko04213,ko05014,map00380,map00630,map01110,map01130,map01200,map04011,map04016,map04068,map04146,map04211,map04212,map04213,map05014	M00532	R00009,R00602,R02670	RC00034,RC00767,RC02141,RC02755	ko00000,ko00001,ko00002,ko01000				Fungi	1GS3G@112252,38BMC@33154,3NUEX@4751,COG0753@1,KOG0047@2759	NA|NA|NA	P	Occurs in almost all aerobically respiring organisms and serves to protect cells from the toxic effects of hydrogen peroxide
MA-00090-261	POM152	ko:K18725	0.15295	0.58739	NoChange	nucleoporin pom152	78898.MVEG_03730T0	0	1451.8	Fungi incertae sedis	GO:0000226,GO:0003674,GO:0005198,GO:0005488,GO:0005515,GO:0005575,GO:0005622,GO:0005623,GO:0005634,GO:0005635,GO:0005641,GO:0005643,GO:0005737,GO:0005739,GO:0006606,GO:0006810,GO:0006886,GO:0006913,GO:0006996,GO:0006997,GO:0006999,GO:0007010,GO:0007017,GO:0007049,GO:0008104,GO:0008150,GO:0009987,GO:0012505,GO:0015031,GO:0015833,GO:0016020,GO:0016021,GO:0016043,GO:0017038,GO:0017056,GO:0022402,GO:…						ko00000,ko03019	1.I.1			Fungi	1GT5F@112252,28HU9@1,2QQ5B@2759,38BJ9@33154,3NU01@4751	NA|NA|NA	S	nucleoporin pom152
MA-00153-557	NPL4	ko:K14015	0.29512	1.5246	NoChange	Nuclear pore localisation protein NPL4	78898.MVEG_10720T0	7.2e-293	1012.7	Fungi incertae sedis	GO:0000151,GO:0000153,GO:0000226,GO:0000278,GO:0000835,GO:0000836,GO:0000837,GO:0000839,GO:0003674,GO:0005488,GO:0005515,GO:0005575,GO:0005622,GO:0005623,GO:0005634,GO:0005737,GO:0005739,GO:0005740,GO:0005741,GO:0005783,GO:0005789,GO:0005829,GO:0006139,GO:0006401,GO:0006508,GO:0006511,GO:0006515,GO:0006725,GO:0006807,GO:0006810,GO:0006886,GO:0006950,GO:0006996,GO:0007010,GO:0007017,GO:0007049,GO:…		ko04141,map04141	M00400,M00403			ko00000,ko00001,ko00002				Fungi	1GS1D@112252,38CMA@33154,3NU81@4751,COG5100@1,KOG2834@2759	NA|NA|NA	UY	Nuclear pore localisation protein NPL4
MA-00120-215	MDN1	ko:K14572	0.18341	2.9568	NoChange	Nuclear chaperone required for maturation and nuclear export of pre-60S ribosome subunits	78898.MVEG_08775T0	0	7640	Fungi incertae sedis	GO:0000027,GO:0003674,GO:0003824,GO:0005488,GO:0005509,GO:0005575,GO:0005622,GO:0005623,GO:0005634,GO:0005654,GO:0005737,GO:0005739,GO:0006139,GO:0006364,GO:0006396,GO:0006725,GO:0006807,GO:0006996,GO:0008150,GO:0008152,GO:0009987,GO:0010467,GO:0016043,GO:0016070,GO:0016072,GO:0016462,GO:0016787,GO:0016817,GO:0016818,GO:0016887,GO:0017111,GO:0022607,GO:0022613,GO:0022618,GO:0030684,GO:0030687,GO:…		ko03008,map03008				ko00000,ko00001,ko03009				Fungi	1GT2Q@112252,38FBP@33154,3NUU0@4751,COG5271@1,KOG1808@2759	NA|NA|NA	S	Nuclear chaperone required for maturation and nuclear export of pre-60S ribosome subunits
MA-00073-417	EFM5	ko:K03953	0.13032	0.49787	NoChange	NmrA-like family	78898.MVEG_06705T0	9.3e-190	669.5	Fungi incertae sedis	GO:0003674,GO:0003824,GO:0003954,GO:0005575,GO:0005622,GO:0005623,GO:0005737,GO:0005739,GO:0005759,GO:0006732,GO:0006733,GO:0006743,GO:0006744,GO:0008150,GO:0008152,GO:0009058,GO:0009108,GO:0009987,GO:0016491,GO:0016651,GO:0031974,GO:0042180,GO:0042181,GO:0043226,GO:0043227,GO:0043229,GO:0043231,GO:0043233,GO:0044237,GO:0044249,GO:0044281,GO:0044283,GO:0044422,GO:0044424,GO:0044429,GO:0044444,GO:…		ko00190,ko01100,ko04714,ko04723,ko04932,ko05010,ko05012,ko05016,map00190,map01100,map04714,map04723,map04932,map05010,map05012,map05016	M00146			ko00000,ko00001,ko00002	3.D.1.6			Fungi	1GS5E@112252,38G7B@33154,3NV96@4751,COG0702@1,KOG2865@2759	NA|NA|NA	C	NmrA-like family
MA-00090-429		ko:K20792	0.32509	0.6562	NoChange	NMDA receptor-regulated protein 1	78898.MVEG_02607T0	0	1180.6	Fungi incertae sedis	GO:0003674,GO:0005575,GO:0005622,GO:0005623,GO:0005737,GO:0005739,GO:0006464,GO:0006473,GO:0006474,GO:0006807,GO:0008047,GO:0008150,GO:0008152,GO:0009893,GO:0009987,GO:0010467,GO:0010468,GO:0010604,GO:0010628,GO:0010698,GO:0017196,GO:0018193,GO:0018206,GO:0019222,GO:0019538,GO:0030234,GO:0031248,GO:0031323,GO:0031325,GO:0031365,GO:0031399,GO:0031401,GO:0031414,GO:0031415,GO:0032268,GO:0032270,GO:…						ko00000,ko03036				Fungi	1GSUB@112252,38EST@33154,3NWWH@4751,KOG1156@1,KOG1156@2759	NA|NA|NA	B	NMDA receptor-regulated protein 1
MA-00334-45			0.070198	1.62	NoChange	NIF3 (NGG1p interacting factor 3)	78898.MVEG_12042T0	1.9e-139	501.9	Fungi incertae sedis	GO:0003674,GO:0003824,GO:0003933,GO:0005575,GO:0005622,GO:0005623,GO:0005737,GO:0005739,GO:0016787,GO:0016810,GO:0016814,GO:0019238,GO:0043226,GO:0043227,GO:0043229,GO:0043231,GO:0044424,GO:0044444,GO:0044464										Fungi	1GSG2@112252,39U3J@33154,3P0V5@4751,COG0327@1,KOG4131@2759	NA|NA|NA	S	NIF3 (NGG1p interacting factor 3)
MA-00139-210	NTH1	ko:K01194	0.26472	1.4772	NoChange	Neutral trehalase Ca2+ binding domain	78898.MVEG_09118T0	0	1297	Fungi incertae sedis	GO:0001101,GO:0003674,GO:0003824,GO:0004553,GO:0004555,GO:0005575,GO:0005622,GO:0005623,GO:0005737,GO:0005739,GO:0005975,GO:0005984,GO:0005991,GO:0005993,GO:0006950,GO:0007154,GO:0008150,GO:0008152,GO:0009056,GO:0009269,GO:0009311,GO:0009313,GO:0009414,GO:0009415,GO:0009605,GO:0009628,GO:0009987,GO:0009991,GO:0010035,GO:0015927,GO:0016052,GO:0016787,GO:0016798,GO:0031668,GO:0033554,GO:0042221,GO:…	3.2.1.28	ko00500,ko01100,map00500,map01100		R00010	RC00049	ko00000,ko00001,ko00537,ko01000		GH37		Fungi	1GVM9@112252,38CKH@33154,3NXP5@4751,COG1626@1,KOG0602@2759	NA|NA|NA	G	Neutral trehalase Ca2+ binding domain
MA-00101-283	NTH1	ko:K01194	0.99807	1.0096	NoChange	Neutral trehalase Ca2+ binding domain	78898.MVEG_09118T0	0	1332.8	Fungi incertae sedis	GO:0001101,GO:0003674,GO:0003824,GO:0004553,GO:0004555,GO:0005575,GO:0005622,GO:0005623,GO:0005737,GO:0005739,GO:0005975,GO:0005984,GO:0005991,GO:0005993,GO:0006950,GO:0007154,GO:0008150,GO:0008152,GO:0009056,GO:0009269,GO:0009311,GO:0009313,GO:0009414,GO:0009415,GO:0009605,GO:0009628,GO:0009987,GO:0009991,GO:0010035,GO:0015927,GO:0016052,GO:0016787,GO:0016798,GO:0031668,GO:0033554,GO:0042221,GO:…	3.2.1.28	ko00500,ko01100,map00500,map01100		R00010	RC00049	ko00000,ko00001,ko00537,ko01000		GH37		Fungi	1GVM9@112252,38CKH@33154,3NXP5@4751,COG1626@1,KOG0602@2759	NA|NA|NA	G	Neutral trehalase Ca2+ binding domain
MA-00120-261	ndk1	ko:K00940	0.14482	0.65897	NoChange	NDK	78898.MVEG_08604T0	3.4e-74	284.3	Fungi incertae sedis	GO:0003674,GO:0003824,GO:0004550,GO:0005575,GO:0005576,GO:0005622,GO:0005623,GO:0005737,GO:0005739,GO:0005740,GO:0005758,GO:0005829,GO:0006139,GO:0006165,GO:0006213,GO:0006220,GO:0006221,GO:0006241,GO:0006725,GO:0006753,GO:0006793,GO:0006796,GO:0006807,GO:0006950,GO:0006974,GO:0008150,GO:0008152,GO:0009058,GO:0009116,GO:0009117,GO:0009119,GO:0009132,GO:0009141,GO:0009142,GO:0009147,GO:0009148,GO:…	2.7.4.6	ko00230,ko00240,ko00983,ko01100,ko01110,ko01130,ko04016,map00230,map00240,map00983,map01100,map01110,map01130,map04016	M00049,M00050,M00052,M00053	R00124,R00139,R00156,R00330,R00570,R00722,R01137,R01857,R02093,R02326,R02331,R03530,R11894,R11895	RC00002	ko00000,ko00001,ko00002,ko01000,ko04131				Fungi	1GTRA@112252,3A1MB@33154,3P274@4751,COG0105@1,KOG0888@2759	NA|NA|NA	F	NDK
MA-00153-311	NdufS1	ko:K03934	0.14482	2.237	NoChange	NADH-ubiquinone oxidoreductase-G iron-sulfur binding region	78898.MVEG_08952T0	0	1321.2	Fungi incertae sedis	GO:0003674,GO:0003824,GO:0003954,GO:0005488,GO:0005575,GO:0005622,GO:0005623,GO:0005737,GO:0005739,GO:0005740,GO:0005743,GO:0005746,GO:0005747,GO:0006091,GO:0008137,GO:0008150,GO:0008152,GO:0009987,GO:0015980,GO:0016020,GO:0016491,GO:0016651,GO:0016655,GO:0019866,GO:0030964,GO:0031090,GO:0031966,GO:0031967,GO:0031975,GO:0032991,GO:0043226,GO:0043227,GO:0043229,GO:0043231,GO:0044237,GO:0044422,GO:…	1.6.5.3,1.6.99.3	ko00190,ko01100,ko04714,ko04723,ko04932,ko05010,ko05012,ko05016,map00190,map01100,map04714,map04723,map04932,map05010,map05012,map05016	M00143	R11945	RC00061	ko00000,ko00001,ko00002,ko01000	3.D.1.6			Fungi	1GSKY@112252,38DHR@33154,3NW5Z@4751,COG1034@1,KOG2282@2759	NA|NA|NA	C	NADH-ubiquinone oxidoreductase-G iron-sulfur binding region
MA-00055-232		ko:K03946	0.45328	0.67388	NoChange	Nadh-ubiquinone oxidoreductase 105 kda subunit	588596.U9UTE3	1.7e-16	92.4	Fungi	GO:0003674,GO:0003824,GO:0003954,GO:0005575,GO:0005622,GO:0005623,GO:0005737,GO:0005739,GO:0005740,GO:0005743,GO:0005746,GO:0005747,GO:0008137,GO:0008150,GO:0008152,GO:0016020,GO:0016491,GO:0016651,GO:0016655,GO:0019866,GO:0030964,GO:0031090,GO:0031966,GO:0031967,GO:0031975,GO:0032991,GO:0043226,GO:0043227,GO:0043229,GO:0043231,GO:0044422,GO:0044424,GO:0044425,GO:0044429,GO:0044444,GO:0044446,GO:…		ko00190,ko01100,ko04714,ko04723,ko04932,ko05010,ko05012,ko05016,map00190,map01100,map04714,map04723,map04932,map05010,map05012,map05016	M00146			ko00000,ko00001,ko00002	3.D.1.6			Fungi	3A889@33154,3P78W@4751,KOG3446@1,KOG3446@2759	NA|NA|NA	C	Nadh-ubiquinone oxidoreductase 105 kda subunit
MA-00090-169	GPD1	ko:K00006	0.036042	1.9264	NoChange	NAD-dependent glycerol-3-phosphate dehydrogenase C-terminus	78898.MVEG_08419T0	5.7e-186	656.8	Fungi incertae sedis	GO:0000166,GO:0003674,GO:0003824,GO:0004367,GO:0005488,GO:0005575,GO:0005622,GO:0005623,GO:0005634,GO:0005737,GO:0005739,GO:0005777,GO:0005829,GO:0005975,GO:0006066,GO:0006071,GO:0006072,GO:0006114,GO:0006116,GO:0006139,GO:0006605,GO:0006625,GO:0006725,GO:0006732,GO:0006733,GO:0006734,GO:0006753,GO:0006793,GO:0006796,GO:0006807,GO:0006810,GO:0006884,GO:0006886,GO:0006950,GO:0006970,GO:0006972,GO:…	1.1.1.8	ko00564,ko01110,ko04011,map00564,map01110,map04011		R00842	RC00029	ko00000,ko00001,ko01000				Fungi	1GV1N@112252,38E7F@33154,3NVN7@4751,COG0240@1,KOG2711@2759	NA|NA|NA	C	NAD-dependent glycerol-3-phosphate dehydrogenase C-terminus
MA-00297-214	GPD1	ko:K00006	0.32509	1.3058	NoChange	NAD-dependent glycerol-3-phosphate dehydrogenase C-terminus	78898.MVEG_03870T0	9.1e-176	622.9	Fungi incertae sedis	GO:0000166,GO:0003674,GO:0003824,GO:0004367,GO:0005488,GO:0005575,GO:0005622,GO:0005623,GO:0005634,GO:0005737,GO:0005739,GO:0005777,GO:0005829,GO:0005975,GO:0006066,GO:0006071,GO:0006072,GO:0006114,GO:0006116,GO:0006139,GO:0006605,GO:0006625,GO:0006725,GO:0006732,GO:0006733,GO:0006734,GO:0006753,GO:0006793,GO:0006796,GO:0006807,GO:0006810,GO:0006884,GO:0006886,GO:0006950,GO:0006970,GO:0006972,GO:…	1.1.1.8	ko00564,ko01110,ko04011,map00564,map01110,map04011		R00842	RC00029	ko00000,ko00001,ko01000				Fungi	1GV1N@112252,38E7F@33154,3NVN7@4751,COG0240@1,KOG2711@2759	NA|NA|NA	C	NAD-dependent glycerol-3-phosphate dehydrogenase C-terminus
MA-00162-262	GDH2	ko:K15371	0.13063	0.62688	NoChange	NAD( )-dependent glutamate dehydrogenase which degrades glutamate to ammonia and alpha-ketoglutarate	78898.MVEG_05963T0	0	1932.9	Fungi incertae sedis	GO:0003674,GO:0003824,GO:0004352,GO:0004353,GO:0005575,GO:0005622,GO:0005623,GO:0005737,GO:0005739,GO:0006082,GO:0006103,GO:0006106,GO:0006520,GO:0006536,GO:0006538,GO:0006807,GO:0008150,GO:0008152,GO:0009056,GO:0009063,GO:0009064,GO:0009065,GO:0009987,GO:0016054,GO:0016491,GO:0016638,GO:0016639,GO:0019551,GO:0019752,GO:0043226,GO:0043227,GO:0043229,GO:0043231,GO:0043436,GO:0043648,GO:0043649,GO:…	1.4.1.2	ko00220,ko00250,ko00430,ko00910,ko01100,map00220,map00250,map00430,map00910,map01100		R00243	RC00006,RC02799	ko00000,ko00001,ko01000				Fungi	1GVDJ@112252,390UX@33154,3NVNH@4751,COG0334@1,KOG2250@2759	NA|NA|NA	E	NAD( )-dependent glutamate dehydrogenase which degrades glutamate to ammonia and alpha-ketoglutarate
MA-00139-56			0.31759	1.7533	NoChange	NAD dependent epimerase dehydratase	78898.MVEG_02920T0	5e-119	434.1	Fungi incertae sedis	GO:0003674,GO:0003824,GO:0003954,GO:0005575,GO:0005622,GO:0005623,GO:0005737,GO:0005739,GO:0006732,GO:0006733,GO:0006743,GO:0006744,GO:0008150,GO:0008152,GO:0009058,GO:0009108,GO:0009987,GO:0016491,GO:0016651,GO:0042180,GO:0042181,GO:0043226,GO:0043227,GO:0043229,GO:0043231,GO:0044237,GO:0044249,GO:0044281,GO:0044283,GO:0044424,GO:0044444,GO:0044464,GO:0051186,GO:0051188,GO:0055114,GO:0071704,GO:…										Fungi	1GUPX@112252,39UV3@33154,3NVV8@4751,COG0702@1,KOG4288@2759	NA|NA|NA	GM	NAD dependent epimerase dehydratase
MA-00213-619	MCD1	ko:K06670	0.59265	1.4266	NoChange	N terminus of Rad21 / Rec8 like protein	78898.MVEG_12034T0	9.6e-190	670.2	Fungi incertae sedis	GO:0000070,GO:0000228,GO:0000278,GO:0000280,GO:0000724,GO:0000725,GO:0000775,GO:0000779,GO:0000780,GO:0000785,GO:0000790,GO:0000792,GO:0000793,GO:0000794,GO:0000798,GO:0000819,GO:0003674,GO:0003682,GO:0005488,GO:0005515,GO:0005575,GO:0005622,GO:0005623,GO:0005634,GO:0005694,GO:0005720,GO:0005721,GO:0005737,GO:0005739,GO:0006139,GO:0006259,GO:0006281,GO:0006302,GO:0006310,GO:0006323,GO:0006725,GO:…		ko04110,ko04111,map04110,map04111				ko00000,ko00001,ko03036				Fungi	1GU3T@112252,38H3N@33154,3NXWB@4751,KOG1213@1,KOG1213@2759	NA|NA|NA	D	N terminus of Rad21 / Rec8 like protein
MA-00153-81	COQ3	ko:K00568,ko:K00591	0.92325	1.0451	NoChange	Mycolic acid cyclopropane synthetase	78898.MVEG_09661T0	2.5e-121	442.2	Fungi incertae sedis	GO:0003674,GO:0003824,GO:0004395,GO:0005575,GO:0005622,GO:0005623,GO:0005737,GO:0005739,GO:0005740,GO:0005743,GO:0006732,GO:0006733,GO:0006743,GO:0006744,GO:0008150,GO:0008152,GO:0008168,GO:0008171,GO:0008757,GO:0009058,GO:0009108,GO:0009987,GO:0010420,GO:0016020,GO:0016740,GO:0016741,GO:0019866,GO:0019898,GO:0031090,GO:0031966,GO:0031967,GO:0031975,GO:0032259,GO:0042180,GO:0042181,GO:0043226,GO:…	2.1.1.114,2.1.1.222,2.1.1.64	ko00130,ko01100,ko01110,map00130,map01100,map01110	M00117,M00128	R02175,R04711,R04988,R05614,R07235,R08769,R08771,R08781	RC00003,RC00392,RC01895	ko00000,ko00001,ko00002,ko01000				Fungi	1GWVM@112252,39T8B@33154,3NZTD@4751,COG2227@1,KOG1270@2759	NA|NA|NA	H	Mycolic acid cyclopropane synthetase
MA-00072-48	SSA2	ko:K03283	0.67175	0.89679	NoChange	MreB/Mbl protein	78898.MVEG_09750T0	0	1177.5	Fungi incertae sedis	GO:0000049,GO:0000060,GO:0000166,GO:0000209,GO:0000322,GO:0000323,GO:0000324,GO:0000329,GO:0002181,GO:0002376,GO:0003674,GO:0003676,GO:0003723,GO:0003824,GO:0005488,GO:0005515,GO:0005524,GO:0005575,GO:0005576,GO:0005618,GO:0005622,GO:0005623,GO:0005634,GO:0005681,GO:0005737,GO:0005739,GO:0005773,GO:0005774,GO:0005829,GO:0005844,GO:0005886,GO:0006403,GO:0006404,GO:0006412,GO:0006457,GO:0006464,GO:…		ko03040,ko04010,ko04141,ko04144,ko04213,ko04612,ko04915,ko05134,ko05145,ko05162,ko05164,ko05169,map03040,map04010,map04141,map04144,map04213,map04612,map04915,map05134,map05145,map05162,map05164,map05169	M00353,M00355			ko00000,ko00001,ko00002,ko01009,ko03009,ko03029,ko03041,ko03051,ko03110,ko04131,ko04147,ko04516	1.A.33.1			Fungi	1GWB2@112252,38BSZ@33154,3NVJE@4751,COG0443@1,KOG0101@2759	NA|NA|NA	O	MreB/Mbl protein
MA-00153-132	VPS1	ko:K17065	0.97896	1.0099	NoChange	Mortierella verticillata NRRL 6337 vacuolar protein sorting-associated protein 1 (686 aa)	78898.MVEG_09588T0	0	1118.2	Fungi incertae sedis	GO:0000266,GO:0000322,GO:0000323,GO:0000324,GO:0000329,GO:0003373,GO:0003374,GO:0003674,GO:0003774,GO:0003824,GO:0003924,GO:0005488,GO:0005515,GO:0005575,GO:0005622,GO:0005623,GO:0005737,GO:0005739,GO:0005740,GO:0005741,GO:0005768,GO:0005770,GO:0005773,GO:0005774,GO:0005777,GO:0005829,GO:0005856,GO:0005938,GO:0006605,GO:0006623,GO:0006810,GO:0006886,GO:0006897,GO:0006996,GO:0007005,GO:0007010,GO:…	3.6.5.5	ko04139,ko04214,ko04217,ko04621,ko04668,map04139,map04214,map04217,map04621,map04668				ko00000,ko00001,ko01000,ko03029,ko04131,ko04147				Fungi	1GRXE@112252,38C4B@33154,3NU4R@4751,COG0699@1,KOG0446@2759	NA|NA|NA	U	Mortierella verticillata NRRL 6337 vacuolar protein sorting-associated protein 1 (686 aa)
MA-00184-324	VPS1	ko:K17065	0.1445	0.59032	NoChange	Mortierella verticillata NRRL 6337 vacuolar protein sorting-associated protein 1 (686 aa)	78898.MVEG_09588T0	0	1129.4	Fungi incertae sedis	GO:0000266,GO:0000322,GO:0000323,GO:0000324,GO:0000329,GO:0003373,GO:0003374,GO:0003674,GO:0003774,GO:0003824,GO:0003924,GO:0005488,GO:0005515,GO:0005575,GO:0005622,GO:0005623,GO:0005737,GO:0005739,GO:0005740,GO:0005741,GO:0005768,GO:0005770,GO:0005773,GO:0005774,GO:0005777,GO:0005829,GO:0005856,GO:0005938,GO:0006605,GO:0006623,GO:0006810,GO:0006886,GO:0006897,GO:0006996,GO:0007005,GO:0007010,GO:…	3.6.5.5	ko04139,ko04214,ko04217,ko04621,ko04668,map04139,map04214,map04217,map04621,map04668				ko00000,ko00001,ko01000,ko03029,ko04131,ko04147				Fungi	1GRXE@112252,38C4B@33154,3NU4R@4751,COG0699@1,KOG0446@2759	NA|NA|NA	U	Mortierella verticillata NRRL 6337 vacuolar protein sorting-associated protein 1 (686 aa)
MA-00139-189	PYK1	ko:K00873	0.012506	0.65504	NoChange	Mortierella verticillata NRRL 6337 pyruvate kinase	78898.MVEG_00025T0	4.7e-269	933.3	Fungi incertae sedis	GO:0003674,GO:0003824,GO:0004743,GO:0005575,GO:0005618,GO:0005622,GO:0005623,GO:0005737,GO:0005739,GO:0005829,GO:0005886,GO:0005975,GO:0005996,GO:0006006,GO:0006007,GO:0006082,GO:0006090,GO:0006091,GO:0006096,GO:0006139,GO:0006163,GO:0006164,GO:0006165,GO:0006725,GO:0006732,GO:0006733,GO:0006734,GO:0006735,GO:0006753,GO:0006754,GO:0006757,GO:0006793,GO:0006796,GO:0006807,GO:0006950,GO:0007154,GO:…	2.7.1.40	ko00010,ko00230,ko00620,ko01100,ko01110,ko01120,ko01130,ko01200,ko01230,ko04922,ko04930,ko05165,ko05203,ko05230,map00010,map00230,map00620,map01100,map01110,map01120,map01130,map01200,map01230,map04922,map04930,map05165,map05203,map05230	M00001,M00002,M00049,M00050	R00200,R00430,R01138,R01858,R02320	RC00002,RC00015	ko00000,ko00001,ko00002,ko01000,ko04131,ko04147				Fungi	1GVDU@112252,38BPM@33154,3NUBE@4751,COG0469@1,KOG2323@2759	NA|NA|NA	G	Mortierella verticillata NRRL 6337 pyruvate kinase
MA-00101-313	PYK1	ko:K00873	0.089557	0.58571	NoChange	Mortierella verticillata NRRL 6337 pyruvate kinase	78898.MVEG_04577T0	2.8e-208	731.1	Fungi incertae sedis	GO:0003674,GO:0003824,GO:0004743,GO:0005575,GO:0005618,GO:0005622,GO:0005623,GO:0005737,GO:0005739,GO:0005829,GO:0005886,GO:0005975,GO:0005996,GO:0006006,GO:0006007,GO:0006082,GO:0006090,GO:0006091,GO:0006096,GO:0006139,GO:0006163,GO:0006164,GO:0006165,GO:0006725,GO:0006732,GO:0006733,GO:0006734,GO:0006735,GO:0006753,GO:0006754,GO:0006757,GO:0006793,GO:0006796,GO:0006807,GO:0006950,GO:0007154,GO:…	2.7.1.40	ko00010,ko00230,ko00620,ko01100,ko01110,ko01120,ko01130,ko01200,ko01230,ko04922,ko04930,ko05165,ko05203,ko05230,map00010,map00230,map00620,map01100,map01110,map01120,map01130,map01200,map01230,map04922,map04930,map05165,map05203,map05230	M00001,M00002,M00049,M00050	R00200,R00430,R01138,R01858,R02320	RC00002,RC00015	ko00000,ko00001,ko00002,ko01000,ko04131,ko04147				Fungi	1GVDU@112252,38BPM@33154,3NUBE@4751,COG0469@1,KOG2323@2759	NA|NA|NA	G	Mortierella verticillata NRRL 6337 pyruvate kinase
MA-00072-91	NdufS8	ko:K03941	0.88472	0.93805	NoChange	Mortierella verticillata NRRL 6337 NADH dehydrogenase ubiquinone iron-sulfur protein 8, mitochondrial	78898.MVEG_09019T0	2.9e-85	321.6	Fungi incertae sedis	GO:0005575,GO:0005622,GO:0005623,GO:0005737,GO:0005739,GO:0043226,GO:0043227,GO:0043229,GO:0043231,GO:0044424,GO:0044444,GO:0044464	1.6.5.3,1.6.99.3	ko00190,ko01100,ko04714,ko04723,ko04932,ko05010,ko05012,ko05016,map00190,map01100,map04714,map04723,map04932,map05010,map05012,map05016	M00143	R11945	RC00061	ko00000,ko00001,ko00002,ko01000	3.D.1.6			Fungi	1GS0Z@112252,38HK4@33154,3NVE7@4751,COG1143@1,KOG3256@2759	NA|NA|NA	C	Mortierella verticillata NRRL 6337 NADH dehydrogenase ubiquinone iron-sulfur protein 8, mitochondrial
MA-00213-515	ALI1	ko:K03936	0.065151	0.54522	NoChange	Mortierella verticillata NRRL 6337 NADH dehydrogenase (ubiquinone) Fe-S protein 3	78898.MVEG_05014T0	7.2e-136	490	Fungi incertae sedis	GO:0003674,GO:0003824,GO:0003954,GO:0005575,GO:0005622,GO:0005623,GO:0005737,GO:0005739,GO:0005740,GO:0005743,GO:0005746,GO:0005747,GO:0006091,GO:0008137,GO:0008150,GO:0008152,GO:0009987,GO:0015980,GO:0016020,GO:0016491,GO:0016651,GO:0016655,GO:0019866,GO:0030964,GO:0031090,GO:0031966,GO:0031967,GO:0031975,GO:0032991,GO:0043226,GO:0043227,GO:0043229,GO:0043231,GO:0044237,GO:0044422,GO:0044424,GO:…	1.6.5.3,1.6.99.3	ko00190,ko01100,ko04714,ko04723,ko04932,ko05010,ko05012,ko05016,map00190,map01100,map04714,map04723,map04932,map05010,map05012,map05016	M00143	R11945	RC00061	ko00000,ko00001,ko00002,ko01000	3.D.1.6			Fungi	1GSYV@112252,38BAK@33154,3NVZQ@4751,COG0852@1,KOG1713@2759	NA|NA|NA	C	Mortierella verticillata NRRL 6337 NADH dehydrogenase (ubiquinone) Fe-S protein 3
MA-00101-208	CRC1	ko:K15109	0.90787	1.0284	NoChange	Mortierella verticillata NRRL 6337 MC family mitochondrial carrier protein	78898.MVEG_08926T0	9.1e-151	539.7	Fungi incertae sedis	GO:0003674,GO:0005215,GO:0005476,GO:0005575,GO:0005622,GO:0005623,GO:0005737,GO:0005739,GO:0005740,GO:0005743,GO:0006082,GO:0006629,GO:0006631,GO:0006810,GO:0006811,GO:0006812,GO:0006839,GO:0008150,GO:0008152,GO:0008324,GO:0008519,GO:0009987,GO:0015075,GO:0015101,GO:0015226,GO:0015291,GO:0015297,GO:0015651,GO:0015695,GO:0015696,GO:0015697,GO:0015838,GO:0015879,GO:0016020,GO:0016021,GO:0019752,GO:…		ko04714,map04714				ko00000,ko00001,ko02000	2.A.29.8		iMM904.YOR100C,iND750.YOR100C	Fungi	1GSW6@112252,38BD7@33154,3NTYD@4751,KOG0758@1,KOG0758@2759	NA|NA|NA	C	Mortierella verticillata NRRL 6337 MC family mitochondrial carrier protein
MA-00067-296	IDH1	ko:K00030	0.71169	1.1578	NoChange	Mortierella verticillata NRRL 6337 isocitrate dehydrogenase NAD subunit 1, mitochondrial (376 aa)	78898.MVEG_05450T0	1.4e-187	662.1	Fungi incertae sedis	GO:0003674,GO:0003824,GO:0004448,GO:0004449,GO:0005575,GO:0005622,GO:0005623,GO:0005737,GO:0005739,GO:0005759,GO:0005962,GO:0006082,GO:0006091,GO:0006099,GO:0006101,GO:0006102,GO:0006520,GO:0006536,GO:0006537,GO:0006807,GO:0008150,GO:0008152,GO:0008652,GO:0009058,GO:0009060,GO:0009064,GO:0009084,GO:0009295,GO:0009987,GO:0015980,GO:0016053,GO:0016491,GO:0016614,GO:0016616,GO:0016999,GO:0017144,GO:…	1.1.1.41	ko00020,ko01100,ko01110,ko01120,ko01130,ko01200,ko01210,ko01230,map00020,map01100,map01110,map01120,map01130,map01200,map01210,map01230	M00009,M00010	R00709	RC00114	br01601,ko00000,ko00001,ko00002,ko01000				Fungi	1GT44@112252,38EFS@33154,3NV6I@4751,COG0473@1,KOG0784@2759	NA|NA|NA	E	Mortierella verticillata NRRL 6337 isocitrate dehydrogenase NAD subunit 1, mitochondrial (376 aa)
MA-00073-258	IDH1	ko:K00030	0.18369	0.74425	NoChange	Mortierella verticillata NRRL 6337 isocitrate dehydrogenase NAD subunit 1, mitochondrial (376 aa)	78898.MVEG_05450T0	1.2e-191	675.6	Fungi incertae sedis	GO:0003674,GO:0003824,GO:0004448,GO:0004449,GO:0005575,GO:0005622,GO:0005623,GO:0005737,GO:0005739,GO:0005759,GO:0005962,GO:0006082,GO:0006091,GO:0006099,GO:0006101,GO:0006102,GO:0006520,GO:0006536,GO:0006537,GO:0006807,GO:0008150,GO:0008152,GO:0008652,GO:0009058,GO:0009060,GO:0009064,GO:0009084,GO:0009295,GO:0009987,GO:0015980,GO:0016053,GO:0016491,GO:0016614,GO:0016616,GO:0016999,GO:0017144,GO:…	1.1.1.41	ko00020,ko01100,ko01110,ko01120,ko01130,ko01200,ko01210,ko01230,map00020,map01100,map01110,map01120,map01130,map01200,map01210,map01230	M00009,M00010	R00709	RC00114	br01601,ko00000,ko00001,ko00002,ko01000				Fungi	1GT44@112252,38EFS@33154,3NV6I@4751,COG0473@1,KOG0784@2759	NA|NA|NA	E	Mortierella verticillata NRRL 6337 isocitrate dehydrogenase NAD subunit 1, mitochondrial (376 aa)
MA-00189-452	YPT1	ko:K07874	0.76265	1.3026	NoChange	Mortierella verticillata NRRL 6337 GTP-binding protein ypt1 (205 aa)	78898.MVEG_11485T0	9.8e-109	399.4	Fungi incertae sedis	GO:0000045,GO:0000139,GO:0000149,GO:0000407,GO:0003674,GO:0003824,GO:0003924,GO:0005488,GO:0005515,GO:0005575,GO:0005622,GO:0005623,GO:0005737,GO:0005739,GO:0005783,GO:0005789,GO:0005794,GO:0005795,GO:0005801,GO:0006139,GO:0006401,GO:0006725,GO:0006807,GO:0006810,GO:0006886,GO:0006888,GO:0006890,GO:0006900,GO:0006906,GO:0006914,GO:0006996,GO:0007033,GO:0007154,GO:0007165,GO:0007264,GO:0008104,GO:…		ko05134,map05134				ko00000,ko00001,ko04031,ko04131,ko04147				Fungi	1GVN5@112252,38DXZ@33154,3NUNU@4751,KOG0084@1,KOG0084@2759	NA|NA|NA	U	Mortierella verticillata NRRL 6337 GTP-binding protein ypt1 (205 aa)
MA-00162-314	YPT1	ko:K07874	0.90787	0.96088	NoChange	Mortierella verticillata NRRL 6337 GTP-binding protein ypt1 (205 aa)	78898.MVEG_11485T0	2.2e-108	398.3	Fungi incertae sedis	GO:0000045,GO:0000139,GO:0000149,GO:0000407,GO:0003674,GO:0003824,GO:0003924,GO:0005488,GO:0005515,GO:0005575,GO:0005622,GO:0005623,GO:0005737,GO:0005739,GO:0005783,GO:0005789,GO:0005794,GO:0005795,GO:0005801,GO:0006139,GO:0006401,GO:0006725,GO:0006807,GO:0006810,GO:0006886,GO:0006888,GO:0006890,GO:0006900,GO:0006906,GO:0006914,GO:0006996,GO:0007033,GO:0007154,GO:0007165,GO:0007264,GO:0008104,GO:…		ko05134,map05134				ko00000,ko00001,ko04031,ko04131,ko04147				Fungi	1GVN5@112252,38DXZ@33154,3NUNU@4751,KOG0084@1,KOG0084@2759	NA|NA|NA	U	Mortierella verticillata NRRL 6337 GTP-binding protein ypt1 (205 aa)
MA-00073-261	ATP16	ko:K02134	0.8205	1.2714	NoChange	Mortierella verticillata NRRL 6337 F-type H -transporting ATPase subunit delta (160 aa)	78898.MVEG_01069T0	2.6e-59	235.3	Fungi incertae sedis	GO:0000275,GO:0005575,GO:0005622,GO:0005623,GO:0005737,GO:0005739,GO:0005740,GO:0005743,GO:0005753,GO:0005756,GO:0006091,GO:0006119,GO:0006139,GO:0006163,GO:0006164,GO:0006725,GO:0006753,GO:0006754,GO:0006793,GO:0006796,GO:0006807,GO:0006810,GO:0006811,GO:0006812,GO:0006839,GO:0008150,GO:0008152,GO:0009058,GO:0009117,GO:0009123,GO:0009124,GO:0009126,GO:0009127,GO:0009141,GO:0009142,GO:0009144,GO:…		ko00190,ko01100,ko04714,ko05010,ko05012,ko05016,map00190,map01100,map04714,map05010,map05012,map05016	M00158			ko00000,ko00001,ko00002	3.A.2.1		iMM904.YDL004W,iND750.YDL004W	Fungi	1GTTR@112252,3A5WF@33154,3P4C9@4751,COG0355@1,KOG1758@2759	NA|NA|NA	C	Mortierella verticillata NRRL 6337 F-type H -transporting ATPase subunit delta (160 aa)
MA-00067-312	ERG9	ko:K00801	0.97712	0.98407	NoChange	Mortierella verticillata NRRL 6337 farnesyl-diphosphate farnesyltransferase	78898.MVEG_01016T0	2e-193	681.8	Fungi incertae sedis	GO:0003674,GO:0003824,GO:0004310,GO:0004311,GO:0004659,GO:0005575,GO:0005622,GO:0005623,GO:0005737,GO:0005739,GO:0005740,GO:0005741,GO:0005783,GO:0005789,GO:0006066,GO:0006629,GO:0006644,GO:0006694,GO:0006696,GO:0006720,GO:0006721,GO:0006793,GO:0006796,GO:0008150,GO:0008152,GO:0008202,GO:0008204,GO:0008610,GO:0009058,GO:0009987,GO:0012505,GO:0016020,GO:0016021,GO:0016125,GO:0016126,GO:0016128,GO:…	2.5.1.21	ko00100,ko00909,ko01100,ko01110,ko01130,map00100,map00909,map01100,map01110,map01130		R00702,R02872,R06223	RC00362,RC00796,RC02839	ko00000,ko00001,ko01000,ko01006				Fungi	1GS9Q@112252,38FSE@33154,3NXNI@4751,COG1562@1,KOG1459@2759	NA|NA|NA	I	Mortierella verticillata NRRL 6337 farnesyl-diphosphate farnesyltransferase
MA-00213-327	COX6	ko:K02264	0.31645	0.82157	NoChange	Mortierella verticillata NRRL 6337 cytochrome c oxidase subunit Va (141 aa)	78898.MVEG_10037T0	6.3e-47	193.4	Fungi incertae sedis	GO:0003674,GO:0003824,GO:0004129,GO:0005215,GO:0005575,GO:0005622,GO:0005623,GO:0005737,GO:0005739,GO:0005740,GO:0005743,GO:0005746,GO:0005751,GO:0006091,GO:0006119,GO:0006123,GO:0006139,GO:0006163,GO:0006725,GO:0006753,GO:0006793,GO:0006796,GO:0006807,GO:0006810,GO:0006811,GO:0006812,GO:0008150,GO:0008152,GO:0008324,GO:0009055,GO:0009060,GO:0009117,GO:0009123,GO:0009126,GO:0009141,GO:0009144,GO:…		ko00190,ko01100,ko04260,ko04714,ko04932,ko05010,ko05012,ko05016,map00190,map01100,map04260,map04714,map04932,map05010,map05012,map05016	M00154			ko00000,ko00001,ko00002	3.D.4.11,3.D.4.8		iMM904.YHR051W,iND750.YHR051W	Fungi	1GU0F@112252,3A45U@33154,3P3UI@4751,KOG4077@1,KOG4077@2759	NA|NA|NA	C	Mortierella verticillata NRRL 6337 cytochrome c oxidase subunit Va (141 aa)
MA-00101-652	CAT2	ko:K00624	0.95582	0.98458	NoChange	Mortierella verticillata NRRL 6337 carnitine O-acetyltransferase (649 aa)	78898.MVEG_10940T0	0	1204.5	Fungi incertae sedis	GO:0003674,GO:0003824,GO:0004092,GO:0005575,GO:0005622,GO:0005623,GO:0005737,GO:0005739,GO:0005777,GO:0006575,GO:0006577,GO:0006807,GO:0008150,GO:0008152,GO:0008374,GO:0009437,GO:0009987,GO:0016406,GO:0016407,GO:0016413,GO:0016740,GO:0016746,GO:0016747,GO:0034641,GO:0042579,GO:0043226,GO:0043227,GO:0043229,GO:0043231,GO:0044237,GO:0044424,GO:0044444,GO:0044464,GO:0071704,GO:0097164,GO:1901564	2.3.1.7	ko04146,map04146		R02396	RC00004,RC00037	ko00000,ko00001,ko01000				Fungi	1GRU3@112252,38CAT@33154,3NUG1@4751,KOG3717@1,KOG3717@2759	NA|NA|NA	I	Mortierella verticillata NRRL 6337 carnitine O-acetyltransferase (649 aa)
MA-00101-420	HXK2	ko:K00844	0.18892	4.0332	NoChange	Mortierella verticillata NRRL 6337	78898.MVEG_08931T0	2.2e-204	718.4	Fungi incertae sedis	GO:0000166,GO:0001302,GO:0001678,GO:0003674,GO:0003824,GO:0004340,GO:0004396,GO:0005488,GO:0005524,GO:0005575,GO:0005622,GO:0005623,GO:0005634,GO:0005737,GO:0005739,GO:0005829,GO:0005975,GO:0005996,GO:0006000,GO:0006002,GO:0006006,GO:0006007,GO:0006013,GO:0006081,GO:0006082,GO:0006090,GO:0006091,GO:0006096,GO:0006098,GO:0006139,GO:0006163,GO:0006164,GO:0006165,GO:0006355,GO:0006725,GO:0006732,GO:…	2.7.1.1	ko00010,ko00051,ko00052,ko00500,ko00520,ko00521,ko00524,ko01100,ko01110,ko01120,ko01130,ko01200,ko04066,ko04910,ko04930,ko04973,ko05230,map00010,map00051,map00052,map00500,map00520,map00521,map00524,map01100,map01110,map01120,map01130,map01200,map04066,map04910,map04930,map04973,map05230	M00001,M00549	R00299,R00760,R00867,R01326,R01600,R01786,R01961,R03920	RC00002,RC00017	ko00000,ko00001,ko00002,ko01000,ko04131			iMM904.YFR053C,iND750.YFR053C	Fungi	1GVDK@112252,38DFC@33154,3NW32@4751,COG5026@1,KOG1369@2759	NA|NA|NA	G	Mortierella verticillata NRRL 6337
MA-00101-344	FAA2	ko:K01897	0.31962	2.4338	NoChange	Mortierella verticillata NRRL 6337	78898.MVEG_09056T0	3.8e-224	784.3	Fungi incertae sedis	GO:0001676,GO:0003674,GO:0003824,GO:0004467,GO:0005575,GO:0005622,GO:0005623,GO:0005737,GO:0005739,GO:0005777,GO:0006082,GO:0006629,GO:0006631,GO:0008150,GO:0008152,GO:0009987,GO:0015645,GO:0016405,GO:0016874,GO:0016877,GO:0016878,GO:0019752,GO:0031956,GO:0031957,GO:0032787,GO:0042579,GO:0043226,GO:0043227,GO:0043229,GO:0043231,GO:0043436,GO:0044237,GO:0044238,GO:0044255,GO:0044281,GO:0044424,GO:…	6.2.1.3	ko00061,ko00071,ko01100,ko01212,ko02024,ko03320,ko04146,ko04216,ko04714,ko04920,map00061,map00071,map01100,map01212,map02024,map03320,map04146,map04216,map04714,map04920	M00086	R01280	RC00004,RC00014	ko00000,ko00001,ko00002,ko01000,ko01004,ko04147	4.C.1.1			Fungi	1GSPT@112252,38BK9@33154,3NUAR@4751,COG1022@1,KOG1256@2759	NA|NA|NA	I	Mortierella verticillata NRRL 6337
MA-00142-1	RAS1	ko:K07827	0.089774	2.0038	NoChange	Mortierella verticillata NRRL 6337	78898.MVEG_00324T0	1.2e-112	412.5	Fungi incertae sedis	GO:0000003,GO:0000165,GO:0000166,GO:0000409,GO:0000411,GO:0000746,GO:0000747,GO:0000749,GO:0000750,GO:0000753,GO:0000767,GO:0000902,GO:0000935,GO:0001302,GO:0001558,GO:0001882,GO:0001883,GO:0001884,GO:0002134,GO:0002135,GO:0003006,GO:0003674,GO:0003824,GO:0003924,GO:0005488,GO:0005525,GO:0005575,GO:0005622,GO:0005623,GO:0005634,GO:0005737,GO:0005739,GO:0005783,GO:0005789,GO:0005856,GO:0005886,GO:…		ko01521,ko01522,ko04010,ko04012,ko04013,ko04014,ko04015,ko04062,ko04068,ko04071,ko04072,ko04137,ko04138,ko04140,ko04150,ko04151,ko04210,ko04211,ko04213,ko04214,ko04218,ko04320,ko04360,ko04370,ko04371,ko04540,ko04550,ko04650,ko04660,ko04662,ko04664,ko04714,ko04720,ko04722,ko04725,ko04726,ko04730,ko04810,ko04910,ko04912,ko04914,ko04915,ko04916,ko04917,ko04919,ko04921,ko04926,ko04933,ko04960,ko05034…				ko00000,ko00001,ko04031,ko04131				Fungi	1GW1W@112252,38C7W@33154,3NUEZ@4751,COG1100@1,KOG0395@2759	NA|NA|NA	S	Mortierella verticillata NRRL 6337
MA-00153-526	FAA2	ko:K01897	0.095788	1.6289	NoChange	Mortierella verticillata NRRL 6337	78898.MVEG_01199T0	0	1248.8	Fungi incertae sedis	GO:0001676,GO:0003674,GO:0003824,GO:0004467,GO:0005575,GO:0005622,GO:0005623,GO:0005737,GO:0005739,GO:0005777,GO:0006082,GO:0006629,GO:0006631,GO:0008150,GO:0008152,GO:0009987,GO:0015645,GO:0016405,GO:0016874,GO:0016877,GO:0016878,GO:0019752,GO:0031956,GO:0031957,GO:0032787,GO:0042579,GO:0043226,GO:0043227,GO:0043229,GO:0043231,GO:0043436,GO:0044237,GO:0044238,GO:0044255,GO:0044281,GO:0044424,GO:…	6.2.1.3	ko00061,ko00071,ko01100,ko01212,ko02024,ko03320,ko04146,ko04216,ko04714,ko04920,map00061,map00071,map01100,map01212,map02024,map03320,map04146,map04216,map04714,map04920	M00086	R01280	RC00004,RC00014	ko00000,ko00001,ko00002,ko01000,ko01004,ko04147	4.C.1.1			Fungi	1GSPT@112252,38BK9@33154,3NUAR@4751,COG1022@1,KOG1256@2759	NA|NA|NA	I	Mortierella verticillata NRRL 6337
MA-00213-192	THS1	ko:K01868	0.72097	1.2089	NoChange	Mortierella verticillata NRRL 6337	78898.MVEG_02935T0	0	1241.9	Fungi incertae sedis	GO:0002181,GO:0003674,GO:0003824,GO:0004812,GO:0004829,GO:0005575,GO:0005622,GO:0005623,GO:0005737,GO:0005739,GO:0006082,GO:0006139,GO:0006399,GO:0006412,GO:0006418,GO:0006435,GO:0006518,GO:0006520,GO:0006725,GO:0006807,GO:0008150,GO:0008152,GO:0009058,GO:0009059,GO:0009987,GO:0010467,GO:0016070,GO:0016874,GO:0016875,GO:0019538,GO:0019752,GO:0034641,GO:0034645,GO:0034660,GO:0043038,GO:0043039,GO:…	6.1.1.3	ko00970,map00970	M00359,M00360	R03663	RC00055,RC00523	ko00000,ko00001,ko00002,ko01000,ko01007,ko03016			iMM904.YIL078W,iND750.YIL078W	Fungi	1GSV2@112252,38C5Y@33154,3NUM7@4751,COG0441@1,KOG1637@2759	NA|NA|NA	J	Mortierella verticillata NRRL 6337
MA-00120-318			0.38409	1.1842	NoChange	Mortierella verticillata NRRL 6337	78898.MVEG_11206T0	2.7e-266	924.5	Fungi incertae sedis	GO:0005575,GO:0005622,GO:0005623,GO:0005628,GO:0005737,GO:0005739,GO:0005740,GO:0005741,GO:0005886,GO:0016020,GO:0019867,GO:0031090,GO:0031966,GO:0031967,GO:0031968,GO:0031975,GO:0042763,GO:0042764,GO:0043226,GO:0043227,GO:0043229,GO:0043231,GO:0044422,GO:0044424,GO:0044429,GO:0044444,GO:0044446,GO:0044464,GO:0071944,GO:0098588,GO:0098805										Fungi	1GT09@112252,28H57@1,2QPI0@2759,38GVF@33154,3NVQT@4751	NA|NA|NA	S	Mortierella verticillata NRRL 6337
MA-00320-6	RAS1	ko:K07827	0.97985	1.0424	NoChange	Mortierella verticillata NRRL 6337	78898.MVEG_00324T0	7.8e-101	373.2	Fungi incertae sedis	GO:0000003,GO:0000165,GO:0000166,GO:0000409,GO:0000411,GO:0000746,GO:0000747,GO:0000749,GO:0000750,GO:0000753,GO:0000767,GO:0000902,GO:0000935,GO:0001302,GO:0001558,GO:0001882,GO:0001883,GO:0001884,GO:0002134,GO:0002135,GO:0003006,GO:0003674,GO:0003824,GO:0003924,GO:0005488,GO:0005525,GO:0005575,GO:0005622,GO:0005623,GO:0005634,GO:0005737,GO:0005739,GO:0005783,GO:0005789,GO:0005856,GO:0005886,GO:…		ko01521,ko01522,ko04010,ko04012,ko04013,ko04014,ko04015,ko04062,ko04068,ko04071,ko04072,ko04137,ko04138,ko04140,ko04150,ko04151,ko04210,ko04211,ko04213,ko04214,ko04218,ko04320,ko04360,ko04370,ko04371,ko04540,ko04550,ko04650,ko04660,ko04662,ko04664,ko04714,ko04720,ko04722,ko04725,ko04726,ko04730,ko04810,ko04910,ko04912,ko04914,ko04915,ko04916,ko04917,ko04919,ko04921,ko04926,ko04933,ko04960,ko05034…				ko00000,ko00001,ko04031,ko04131				Fungi	1GW1W@112252,38C7W@33154,3NUEZ@4751,COG1100@1,KOG0395@2759	NA|NA|NA	S	Mortierella verticillata NRRL 6337
MA-00101-245	GOR1	ko:K00015	0.49404	0.86607	NoChange	Mortierella verticillata NRRL 6337	78898.MVEG_08996T0	3.1e-153	548.1	Fungi incertae sedis	GO:0003674,GO:0003712,GO:0003714,GO:0003824,GO:0005488,GO:0005515,GO:0005575,GO:0005622,GO:0005623,GO:0005634,GO:0005737,GO:0005739,GO:0005829,GO:0006081,GO:0006082,GO:0008150,GO:0008152,GO:0009056,GO:0009436,GO:0009889,GO:0009890,GO:0009892,GO:0009987,GO:0010556,GO:0010558,GO:0010605,GO:0016054,GO:0016491,GO:0016614,GO:0016616,GO:0016618,GO:0019219,GO:0019222,GO:0019752,GO:0030267,GO:0031323,GO:…	1.1.1.26	ko00630,ko01100,ko01110,ko01120,map00630,map01100,map01110,map01120		R00717,R01388	RC00031,RC00042	ko00000,ko00001,ko01000				Fungi	1GTQD@112252,38CKW@33154,3NW94@4751,COG1052@1,KOG0069@2759	NA|NA|NA	C	Mortierella verticillata NRRL 6337
MA-00334-415	THS1	ko:K01868	0.51542	0.843	NoChange	Mortierella verticillata NRRL 6337	78898.MVEG_00771T0	0	1354.7	Fungi incertae sedis	GO:0002181,GO:0003674,GO:0003824,GO:0004812,GO:0004829,GO:0005575,GO:0005622,GO:0005623,GO:0005737,GO:0005739,GO:0006082,GO:0006139,GO:0006399,GO:0006412,GO:0006418,GO:0006435,GO:0006518,GO:0006520,GO:0006725,GO:0006807,GO:0008150,GO:0008152,GO:0009058,GO:0009059,GO:0009987,GO:0010467,GO:0016070,GO:0016874,GO:0016875,GO:0019538,GO:0019752,GO:0034641,GO:0034645,GO:0034660,GO:0043038,GO:0043039,GO:…	6.1.1.3	ko00970,map00970	M00359,M00360	R03663	RC00055,RC00523	ko00000,ko00001,ko00002,ko01000,ko01007,ko03016			iMM904.YIL078W,iND750.YIL078W	Fungi	1GSV2@112252,38C5Y@33154,3NUM7@4751,COG0441@1,KOG1637@2759	NA|NA|NA	J	Mortierella verticillata NRRL 6337
MA-00184-99			0.028306	0.72923	NoChange	Mortierella verticillata NRRL 6337	78898.MVEG_05487T0	6e-286	989.9	Fungi incertae sedis	GO:0005575,GO:0005622,GO:0005623,GO:0005628,GO:0005737,GO:0005739,GO:0005740,GO:0005741,GO:0005886,GO:0016020,GO:0019867,GO:0031090,GO:0031966,GO:0031967,GO:0031968,GO:0031975,GO:0042763,GO:0042764,GO:0043226,GO:0043227,GO:0043229,GO:0043231,GO:0044422,GO:0044424,GO:0044429,GO:0044444,GO:0044446,GO:0044464,GO:0071944,GO:0098588,GO:0098805										Fungi	1GT09@112252,28H57@1,2QPI0@2759,38GVF@33154,3NVQT@4751	NA|NA|NA	S	Mortierella verticillata NRRL 6337
MA-00189-111	phr1	ko:K01669	0.10472	0.62361	NoChange	Mortierella verticillata NRRL 6337	78898.MVEG_03482T0	1e-205	723	Fungi incertae sedis	GO:0000719,GO:0003674,GO:0003676,GO:0003723,GO:0003729,GO:0003824,GO:0003904,GO:0003913,GO:0005488,GO:0005575,GO:0005622,GO:0005623,GO:0005634,GO:0005737,GO:0005739,GO:0006139,GO:0006259,GO:0006281,GO:0006290,GO:0006725,GO:0006807,GO:0006950,GO:0006974,GO:0008150,GO:0008152,GO:0009987,GO:0016829,GO:0016830,GO:0033554,GO:0034641,GO:0043170,GO:0043226,GO:0043227,GO:0043229,GO:0043231,GO:0044237,GO:…	4.1.99.3					ko00000,ko01000,ko03400				Fungi	1GUID@112252,39A00@33154,3NUHD@4751,COG0415@1,KOG0133@2759	NA|NA|NA	LT	Mortierella verticillata NRRL 6337
MA-00153-208	DNM1	ko:K17065	0.054673	0.53958	NoChange	Mortierella verticillata NRRL 6337	78898.MVEG_08539T0	0	1287.3	Fungi incertae sedis	GO:0000001,GO:0000002,GO:0000166,GO:0000266,GO:0001300,GO:0001882,GO:0001883,GO:0003373,GO:0003374,GO:0003674,GO:0003774,GO:0003824,GO:0003924,GO:0005488,GO:0005515,GO:0005525,GO:0005575,GO:0005622,GO:0005623,GO:0005737,GO:0005739,GO:0005740,GO:0005741,GO:0005777,GO:0005829,GO:0006914,GO:0006928,GO:0006996,GO:0007005,GO:0007017,GO:0007018,GO:0007031,GO:0007568,GO:0007569,GO:0008017,GO:0008092,GO:…	3.6.5.5	ko04139,ko04214,ko04217,ko04621,ko04668,map04139,map04214,map04217,map04621,map04668				ko00000,ko00001,ko01000,ko03029,ko04131,ko04147				Fungi	1GV86@112252,38C4B@33154,3NU71@4751,COG0699@1,KOG0446@2759	NA|NA|NA	U	Mortierella verticillata NRRL 6337
MA-00055-21	ATP7	ko:K02138	0.16888	0.61956	NoChange	Mitochondrial membrane ATP synthase (F(1)F(0) ATP synthase or Complex V) produces ATP from ADP in the presence of a proton gradient across the membrane which is generated by electron transport complexes of the respiratory chain. F-type ATPases consist of two structural domains, F(1) - containing the extramembraneous catalytic core, and F(0) - containing the membrane proton channel, linked togethe…	78898.MVEG_01290T0	3.1e-79	301.2	Fungi incertae sedis	GO:0000274,GO:0000276,GO:0003674,GO:0005198,GO:0005575,GO:0005622,GO:0005623,GO:0005737,GO:0005739,GO:0005740,GO:0005743,GO:0005753,GO:0006091,GO:0006119,GO:0006139,GO:0006163,GO:0006164,GO:0006725,GO:0006753,GO:0006754,GO:0006793,GO:0006796,GO:0006807,GO:0006810,GO:0006811,GO:0006812,GO:0006839,GO:0008150,GO:0008152,GO:0009058,GO:0009117,GO:0009123,GO:0009124,GO:0009126,GO:0009127,GO:0009141,GO:…		ko00190,ko01100,ko04714,ko05010,ko05012,ko05016,map00190,map01100,map04714,map05010,map05012,map05016	M00158			ko00000,ko00001,ko00002	3.A.2.1			Fungi	1GTUZ@112252,39YEZ@33154,3P34B@4751,KOG3366@1,KOG3366@2759	NA|NA|NA	C	Mitochondrial membrane ATP synthase (F(1)F(0) ATP synthase or Complex V) produces ATP from ADP in the presence of a proton gradient across the membrane which is generated by electron transport complexes of the respiratory chain. F-type ATPases consist of two structural domains, F(1) - containing the extramembraneous catalytic core, and F(0) - containing the membrane proton channel, linked togethe…
MA-00323-15	ATP7	ko:K02138	0.0017221	0.50049	NoChange	Mitochondrial membrane ATP synthase (F(1)F(0) ATP synthase or Complex V) produces ATP from ADP in the presence of a proton gradient across the membrane which is generated by electron transport complexes of the respiratory chain. F-type ATPases consist of two structural domains, F(1) - containing the extramembraneous catalytic core, and F(0) - containing the membrane proton channel, linked togethe…	78898.MVEG_01290T0	3.9e-82	310.8	Fungi incertae sedis	GO:0000274,GO:0000276,GO:0003674,GO:0005198,GO:0005575,GO:0005622,GO:0005623,GO:0005737,GO:0005739,GO:0005740,GO:0005743,GO:0005753,GO:0006091,GO:0006119,GO:0006139,GO:0006163,GO:0006164,GO:0006725,GO:0006753,GO:0006754,GO:0006793,GO:0006796,GO:0006807,GO:0006810,GO:0006811,GO:0006812,GO:0006839,GO:0008150,GO:0008152,GO:0009058,GO:0009117,GO:0009123,GO:0009124,GO:0009126,GO:0009127,GO:0009141,GO:…		ko00190,ko01100,ko04714,ko05010,ko05012,ko05016,map00190,map01100,map04714,map05010,map05012,map05016	M00158			ko00000,ko00001,ko00002	3.A.2.1			Fungi	1GTUZ@112252,39YEZ@33154,3P34B@4751,KOG3366@1,KOG3366@2759	NA|NA|NA	C	Mitochondrial membrane ATP synthase (F(1)F(0) ATP synthase or Complex V) produces ATP from ADP in the presence of a proton gradient across the membrane which is generated by electron transport complexes of the respiratory chain. F-type ATPases consist of two structural domains, F(1) - containing the extramembraneous catalytic core, and F(0) - containing the membrane proton channel, linked togethe…
MA-00270-132	TAM41	ko:K17807	0.18975	0.5474	NoChange	Mitochondrial matrix Mmp37	78898.MVEG_11700T0	1.4e-195	689.1	Fungi incertae sedis	GO:0003674,GO:0003824,GO:0004605,GO:0005575,GO:0005622,GO:0005623,GO:0005737,GO:0005739,GO:0005740,GO:0005743,GO:0005759,GO:0006629,GO:0006644,GO:0006650,GO:0006655,GO:0006793,GO:0006796,GO:0006996,GO:0007005,GO:0007006,GO:0008150,GO:0008152,GO:0008610,GO:0008654,GO:0009058,GO:0009987,GO:0016020,GO:0016043,GO:0016740,GO:0016772,GO:0016779,GO:0019637,GO:0019866,GO:0019898,GO:0031090,GO:0031312,GO:…						ko00000,ko03029				Fungi	1GSIX@112252,38TTK@33154,3NYI1@4751,KOG2986@1,KOG2986@2759	NA|NA|NA	S	Mitochondrial matrix Mmp37
MA-00334-257	TOM22	ko:K17769	0.011484	0.53491	NoChange	Mitochondrial import receptor subunit Tom22	78898.MVEG_10054T0	2.1e-59	235	Fungi incertae sedis	GO:0005575,GO:0005622,GO:0005623,GO:0005737,GO:0005739,GO:0005740,GO:0005741,GO:0005742,GO:0006605,GO:0006626,GO:0006810,GO:0006839,GO:0006886,GO:0006996,GO:0007005,GO:0007006,GO:0008104,GO:0008150,GO:0009987,GO:0015031,GO:0015833,GO:0016020,GO:0016021,GO:0016043,GO:0017038,GO:0019867,GO:0030150,GO:0031090,GO:0031224,GO:0031300,GO:0031301,GO:0031306,GO:0031307,GO:0031966,GO:0031967,GO:0031968,GO:…						ko00000,ko02000,ko03029	3.A.8.1			Fungi	1GUB8@112252,3A6BX@33154,3P6N1@4751,KOG4111@1,KOG4111@2759	NA|NA|NA	U	Mitochondrial import receptor subunit Tom22
MA-00326-200	MEF1	ko:K02355	0.092233	0.29095	NoChange	Mitochondrial GTPase that catalyzes the GTP-dependent ribosomal translocation step during translation elongation. During this step, the ribosome changes from the pre-translocational (PRE) to the post-translocational (POST) state as the newly formed A- site-bound peptidyl-tRNA and P-site-bound deacylated tRNA move to the P and E sites, respectively. Catalyzes the coordinated movement of the two tR…	78898.MVEG_05881T0	0	1231.1	Fungi incertae sedis	GO:0000166,GO:0001882,GO:0001883,GO:0003674,GO:0003676,GO:0003723,GO:0003746,GO:0003824,GO:0003924,GO:0005488,GO:0005525,GO:0005575,GO:0005622,GO:0005623,GO:0005737,GO:0005739,GO:0005829,GO:0006412,GO:0006414,GO:0006518,GO:0006807,GO:0008135,GO:0008150,GO:0008152,GO:0009058,GO:0009059,GO:0009987,GO:0010467,GO:0016462,GO:0016787,GO:0016817,GO:0016818,GO:0017076,GO:0017111,GO:0019001,GO:0019538,GO:…						ko00000,ko03012,ko03029				Fungi	1GSSU@112252,38GUI@33154,3NV2U@4751,COG0480@1,KOG0465@2759	NA|NA|NA	J	Mitochondrial GTPase that catalyzes the GTP-dependent ribosomal translocation step during translation elongation. During this step, the ribosome changes from the pre-translocational (PRE) to the post-translocational (POST) state as the newly formed A- site-bound peptidyl-tRNA and P-site-bound deacylated tRNA move to the P and E sites, respectively. Catalyzes the coordinated movement of the two tR…
MA-00072-283	MAM33	ko:K15414	0.20812	0.65098	NoChange	Mitochondrial glycoprotein	78898.MVEG_04746T0	3.6e-101	374.8	Fungi incertae sedis	GO:0003674,GO:0003676,GO:0005488,GO:0005575,GO:0005622,GO:0005623,GO:0005737,GO:0005739,GO:0005759,GO:0006091,GO:0006417,GO:0008150,GO:0008152,GO:0008494,GO:0009060,GO:0009889,GO:0009891,GO:0009893,GO:0009987,GO:0010468,GO:0010556,GO:0010557,GO:0010604,GO:0010608,GO:0010628,GO:0015980,GO:0019222,GO:0031323,GO:0031325,GO:0031326,GO:0031328,GO:0031974,GO:0032268,GO:0032270,GO:0034248,GO:0034250,GO:…		ko05168,map05168				ko00000,ko00001,ko00536				Fungi	1GTM3@112252,3A27E@33154,3P2ZN@4751,KOG2536@1,KOG2536@2759	NA|NA|NA	C	Mitochondrial glycoprotein
MA-00320-23	MGM101		0.096395	1.6789	NoChange	Mitochondrial genome maintenance MGM101	78898.MVEG_03063T0	1.3e-89	336.7	Fungi incertae sedis	GO:0000002,GO:0000229,GO:0000262,GO:0000725,GO:0000733,GO:0003674,GO:0003676,GO:0003677,GO:0003690,GO:0003697,GO:0005488,GO:0005575,GO:0005622,GO:0005623,GO:0005634,GO:0005694,GO:0005737,GO:0005739,GO:0005759,GO:0006139,GO:0006259,GO:0006281,GO:0006310,GO:0006725,GO:0006807,GO:0006950,GO:0006974,GO:0006996,GO:0007005,GO:0008150,GO:0008152,GO:0009295,GO:0009987,GO:0016043,GO:0031974,GO:0032042,GO:…										Fungi	1GTG2@112252,29YJK@1,2RXU4@2759,39RWE@33154,3NXAF@4751	NA|NA|NA	S	Mitochondrial genome maintenance MGM101
MA-00210-112	SFC1	ko:K15100	0.20052	2.1879	NoChange	Mitochondrial carrier protein	78898.MVEG_05107T0	7.6e-169	599.7	Fungi incertae sedis	GO:0003674,GO:0005215,GO:0005310,GO:0005342,GO:0005469,GO:0005575,GO:0005622,GO:0005623,GO:0005737,GO:0005739,GO:0005740,GO:0005743,GO:0006810,GO:0006811,GO:0006820,GO:0006835,GO:0006839,GO:0006855,GO:0008150,GO:0008509,GO:0008514,GO:0015075,GO:0015138,GO:0015141,GO:0015238,GO:0015291,GO:0015297,GO:0015318,GO:0015556,GO:0015711,GO:0015740,GO:0015741,GO:0015744,GO:0015849,GO:0015893,GO:0016020,GO:…						ko00000,ko02000	2.A.29.7			Fungi	1GV6N@112252,39H2P@33154,3NVPF@4751,KOG0756@1,KOG0756@2759	NA|NA|NA	C	Mitochondrial carrier protein
MA-00101-622	YHM1		0.37652	1.5059	NoChange	Mitochondrial carrier protein	78898.MVEG_10831T0	5.8e-164	583.6	Fungi incertae sedis	GO:0000002,GO:0001408,GO:0001409,GO:0003674,GO:0005215,GO:0005575,GO:0005622,GO:0005623,GO:0005737,GO:0005739,GO:0005740,GO:0005743,GO:0006810,GO:0006839,GO:0006862,GO:0006863,GO:0006873,GO:0006875,GO:0006879,GO:0006996,GO:0007005,GO:0008150,GO:0009987,GO:0015215,GO:0015216,GO:0015605,GO:0015748,GO:0015851,GO:0015854,GO:0015865,GO:0015931,GO:0015932,GO:0016020,GO:0016021,GO:0016043,GO:0019725,GO:…										Fungi	1GRZ5@112252,38DKN@33154,3NUAX@4751,KOG0750@1,KOG0750@2759	NA|NA|NA	C	Mitochondrial carrier protein
MA-00334-385		ko:K14137,ko:K14684	0.59265	1.3769	NoChange	Mitochondrial carrier protein	78898.MVEG_00950T0	3.3e-210	737.6	Fungi incertae sedis	GO:0000295,GO:0003674,GO:0005215,GO:0005346,GO:0005575,GO:0005622,GO:0005623,GO:0005737,GO:0005739,GO:0005740,GO:0005743,GO:0006810,GO:0006811,GO:0006820,GO:0006839,GO:0006862,GO:0008150,GO:0008509,GO:0008514,GO:0015075,GO:0015215,GO:0015216,GO:0015605,GO:0015711,GO:0015748,GO:0015865,GO:0015868,GO:0015931,GO:0015932,GO:0016020,GO:0016021,GO:0019866,GO:0022857,GO:0031090,GO:0031224,GO:0031966,GO:…						ko00000,ko01006,ko02000	2.A.29.23			Fungi	1GTHF@112252,38FYG@33154,3NU65@4751,KOG0752@1,KOG0752@2759	NA|NA|NA	C	Mitochondrial carrier protein
MA-00297-371		ko:K15115	0.67287	1.2871	NoChange	Mitochondrial carrier protein	78898.MVEG_07907T0	2.6e-161	574.7	Fungi incertae sedis	GO:0003674,GO:0005215,GO:0005342,GO:0005477,GO:0005575,GO:0005622,GO:0005623,GO:0005737,GO:0005739,GO:0005740,GO:0005743,GO:0006810,GO:0006811,GO:0006820,GO:0006839,GO:0006848,GO:0006850,GO:0006862,GO:0008028,GO:0008150,GO:0008509,GO:0008514,GO:0015075,GO:0015215,GO:0015291,GO:0015318,GO:0015355,GO:0015605,GO:0015711,GO:0015718,GO:0015748,GO:0015849,GO:0015931,GO:0015932,GO:0016020,GO:0016021,GO:…						ko00000,ko02000	2.A.29.10.1,2.A.29.10.2,2.A.29.10.3,2.A.29.10.5			Fungi	1GSB5@112252,38GH3@33154,3NWGM@4751,KOG0764@1,KOG0764@2759	NA|NA|NA	C	Mitochondrial carrier protein
MA-00182-24	MIR1	ko:K15102	0.95415	1.0333	NoChange	Mitochondrial carrier protein	78898.MVEG_08869T0	7.6e-129	466.8	Fungi incertae sedis	GO:0003674,GO:0005215,GO:0005315,GO:0005575,GO:0005622,GO:0005623,GO:0005737,GO:0005739,GO:0005740,GO:0005743,GO:0006810,GO:0006811,GO:0006817,GO:0006820,GO:0006839,GO:0008150,GO:0015291,GO:0015318,GO:0015698,GO:0016020,GO:0016021,GO:0019866,GO:0022804,GO:0022857,GO:0031090,GO:0031224,GO:0031300,GO:0031301,GO:0031304,GO:0031305,GO:0031966,GO:0031967,GO:0031975,GO:0032592,GO:0034220,GO:0035435,GO:…						ko00000,ko02000,ko04147	2.A.29.4		iMM904.YJR077C,iND750.YJR077C	Fungi	1GT11@112252,38DBA@33154,3NTWE@4751,KOG0767@1,KOG0767@2759	NA|NA|NA	C	Mitochondrial carrier protein
MA-00184-219		ko:K15100	0.79332	0.92502	NoChange	Mitochondrial carrier protein	78898.MVEG_07370T0	8.6e-133	479.9	Fungi incertae sedis	GO:0003674,GO:0005215,GO:0005342,GO:0005371,GO:0005575,GO:0005622,GO:0005623,GO:0005737,GO:0005739,GO:0005740,GO:0005743,GO:0006810,GO:0006811,GO:0006820,GO:0006839,GO:0006842,GO:0006843,GO:0006855,GO:0008150,GO:0008509,GO:0008514,GO:0015075,GO:0015137,GO:0015142,GO:0015238,GO:0015291,GO:0015318,GO:0015711,GO:0015746,GO:0015849,GO:0015893,GO:0016020,GO:0016021,GO:0019866,GO:0022804,GO:0022857,GO:…						ko00000,ko02000	2.A.29.7			Fungi	1GT92@112252,38I0A@33154,3NUGK@4751,KOG0756@1,KOG0756@2759	NA|NA|NA	C	Mitochondrial carrier protein
MA-00120-22			0.039968	0.59779	NoChange	Mitochondrial carrier protein	78898.MVEG_08579T0	2.5e-156	558.1	Fungi incertae sedis	GO:0003674,GO:0005215,GO:0005342,GO:0005371,GO:0005575,GO:0005622,GO:0005623,GO:0005737,GO:0005739,GO:0005740,GO:0005743,GO:0006810,GO:0006811,GO:0006820,GO:0006839,GO:0006842,GO:0008150,GO:0008509,GO:0008514,GO:0015075,GO:0015142,GO:0015291,GO:0015318,GO:0015711,GO:0015849,GO:0016020,GO:0016021,GO:0019866,GO:0022804,GO:0022857,GO:0031090,GO:0031224,GO:0031966,GO:0031967,GO:0031975,GO:0034220,GO:…										Fungi	1GSNT@112252,38DTJ@33154,3NTZB@4751,KOG0756@1,KOG0756@2759	NA|NA|NA	C	Mitochondrial carrier protein
MA-00120-595		ko:K15110	0.24025	0.57548	NoChange	Mitochondrial carrier protein	78898.MVEG_11687T0	2.3e-113	415.6	Fungi incertae sedis	GO:0003674,GO:0005215,GO:0005310,GO:0005342,GO:0005575,GO:0005622,GO:0005623,GO:0005737,GO:0005739,GO:0005740,GO:0005743,GO:0006810,GO:0006811,GO:0006820,GO:0006835,GO:0006839,GO:0008150,GO:0008509,GO:0008514,GO:0015075,GO:0015139,GO:0015318,GO:0015711,GO:0015742,GO:0015849,GO:0016020,GO:0016021,GO:0019866,GO:0022857,GO:0031090,GO:0031224,GO:0031966,GO:0031967,GO:0031975,GO:0034220,GO:0043226,GO:…						ko00000,ko02000	2.A.29.2.4,2.A.29.2.5,2.A.29.2.8		iMM904.YPL134C,iND750.YPL134C	Fungi	1GRVC@112252,38CTW@33154,3NUWJ@4751,KOG0754@1,KOG0754@2759	NA|NA|NA	C	Mitochondrial carrier protein
MA-00153-62	PET9	ko:K05863	0.013241	0.50148	NoChange	Mitochondrial carrier protein	78898.MVEG_09628T0	9.3e-167	592.8	Fungi incertae sedis	GO:0000295,GO:0003674,GO:0005215,GO:0005346,GO:0005347,GO:0005471,GO:0005575,GO:0005622,GO:0005623,GO:0005737,GO:0005739,GO:0005740,GO:0005743,GO:0006091,GO:0006810,GO:0006811,GO:0006820,GO:0006839,GO:0006855,GO:0006862,GO:0006915,GO:0006996,GO:0007005,GO:0007006,GO:0008150,GO:0008152,GO:0008219,GO:0008509,GO:0008514,GO:0009060,GO:0009061,GO:0009987,GO:0012501,GO:0015075,GO:0015215,GO:0015216,GO:…		ko04020,ko04022,ko04217,ko04218,ko05012,ko05016,ko05166,map04020,map04022,map04217,map04218,map05012,map05016,map05166				ko00000,ko00001,ko02000,ko03029	2.A.29.1		iMM904.YBR085W,iND750.YBR085W	Fungi	1GSW9@112252,38B82@33154,3NWSK@4751,KOG0749@1,KOG0749@2759	NA|NA|NA	C	Mitochondrial carrier protein
MA-00213-317	pkp1	ko:K00898	0.01677	1.6365	NoChange	Mitochondrial branched-chain alpha-ketoacid dehydrogenase kinase	78898.MVEG_10056T0	7.9e-238	829.3	Fungi incertae sedis	GO:0000166,GO:0003674,GO:0003824,GO:0004672,GO:0004740,GO:0005488,GO:0005524,GO:0005575,GO:0005622,GO:0005623,GO:0005737,GO:0005739,GO:0005759,GO:0005967,GO:0006082,GO:0006084,GO:0006085,GO:0006086,GO:0006090,GO:0006139,GO:0006163,GO:0006164,GO:0006464,GO:0006468,GO:0006637,GO:0006725,GO:0006732,GO:0006753,GO:0006790,GO:0006793,GO:0006796,GO:0006807,GO:0008144,GO:0008150,GO:0008152,GO:0009058,GO:…	2.7.11.2					ko00000,ko01000,ko01001				Fungi	1GRT2@112252,38BK5@33154,3NUN3@4751,COG0642@1,KOG0787@2759	NA|NA|NA	T	Mitochondrial branched-chain alpha-ketoacid dehydrogenase kinase
MA-00118-2	PKP2	ko:K16732	0.13999	0.55996	NoChange	Mitochondrial branched-chain alpha-ketoacid dehydrogenase kinase	78898.MVEG_11563T0	3.4e-198	698	Fungi incertae sedis	GO:0003674,GO:0003824,GO:0004672,GO:0004740,GO:0005575,GO:0005622,GO:0005623,GO:0005737,GO:0005739,GO:0006464,GO:0006468,GO:0006793,GO:0006796,GO:0006807,GO:0008150,GO:0008152,GO:0009892,GO:0009987,GO:0015976,GO:0016301,GO:0016310,GO:0016740,GO:0016772,GO:0016773,GO:0018105,GO:0018193,GO:0018209,GO:0019222,GO:0019538,GO:0036211,GO:0043086,GO:0043170,GO:0043226,GO:0043227,GO:0043229,GO:0043231,GO:…						ko00000,ko03036,ko04812				Fungi	1GVMP@112252,39REJ@33154,3NVS5@4751,COG0642@1,KOG0787@2759	NA|NA|NA	T	Mitochondrial branched-chain alpha-ketoacid dehydrogenase kinase
MA-00213-393			0.076589	0.48134	NoChange	Mitochondrial branched-chain alpha-ketoacid dehydrogenase kinase	78898.MVEG_01005T0	1.6e-183	649.4	Fungi incertae sedis	GO:0003674,GO:0003824,GO:0004672,GO:0004740,GO:0005575,GO:0005622,GO:0005623,GO:0005737,GO:0005739,GO:0006464,GO:0006468,GO:0006793,GO:0006796,GO:0006807,GO:0008150,GO:0008152,GO:0009987,GO:0015976,GO:0016301,GO:0016310,GO:0016740,GO:0016772,GO:0016773,GO:0018105,GO:0018193,GO:0018209,GO:0019538,GO:0036211,GO:0043170,GO:0043226,GO:0043227,GO:0043229,GO:0043231,GO:0043412,GO:0044237,GO:0044238,GO:…										Fungi	1GTNG@112252,38GA8@33154,3NY08@4751,COG0642@1,KOG0787@2759	NA|NA|NA	T	Mitochondrial branched-chain alpha-ketoacid dehydrogenase kinase
MA-00153-205	ATP4	ko:K02127	0.020401	0.50285	NoChange	Mitochondrial ATP synthase B chain precursor (ATP-synt_B)	78898.MVEG_01586T0	4e-109	401	Fungi incertae sedis	GO:0000274,GO:0000276,GO:0005575,GO:0005622,GO:0005623,GO:0005737,GO:0005739,GO:0005740,GO:0005743,GO:0005753,GO:0006091,GO:0006119,GO:0006139,GO:0006163,GO:0006164,GO:0006725,GO:0006753,GO:0006754,GO:0006793,GO:0006796,GO:0006807,GO:0006810,GO:0006811,GO:0006812,GO:0006839,GO:0008150,GO:0008152,GO:0009058,GO:0009117,GO:0009123,GO:0009124,GO:0009126,GO:0009127,GO:0009141,GO:0009142,GO:0009144,GO:…		ko00190,ko01100,ko04714,ko05010,ko05012,ko05016,map00190,map01100,map04714,map05010,map05012,map05016	M00158			ko00000,ko00001,ko00002	3.A.2.1			Fungi	1GV9M@112252,38DS3@33154,3P03P@4751,KOG3976@1,KOG3976@2759	NA|NA|NA	C	Mitochondrial ATP synthase B chain precursor (ATP-synt_B)
MA-00112-167	STE23	ko:K01408	0.34279	1.2704	NoChange	Middle or third domain of peptidase_M16	78898.MVEG_05601T0	0	1733	Fungi incertae sedis	GO:0003674,GO:0003824,GO:0004175,GO:0004222,GO:0005575,GO:0005622,GO:0005623,GO:0005737,GO:0005739,GO:0006508,GO:0006807,GO:0007323,GO:0008150,GO:0008152,GO:0008233,GO:0008237,GO:0010467,GO:0016020,GO:0016787,GO:0019538,GO:0019898,GO:0031136,GO:0031137,GO:0031139,GO:0043170,GO:0043226,GO:0043227,GO:0043229,GO:0043231,GO:0043900,GO:0043902,GO:0044238,GO:0044424,GO:0044425,GO:0044444,GO:0044464,GO:…	3.4.24.56	ko05010,map05010				ko00000,ko00001,ko01000,ko01002				Fungi	1GT2W@112252,38D2B@33154,3NUAC@4751,COG1025@1,KOG0959@2759	NA|NA|NA	O	Middle or third domain of peptidase_M16
MA-00189-178		ko:K22139	0.44154	0.84995	NoChange	Mediates the uptake of pyruvate into mitochondria	78898.MVEG_03225T0	6e-50	203.4	Fungi incertae sedis	GO:0003674,GO:0005215,GO:0005342,GO:0005575,GO:0005622,GO:0005623,GO:0005737,GO:0005739,GO:0005740,GO:0005743,GO:0006810,GO:0006811,GO:0006820,GO:0006839,GO:0006848,GO:0006850,GO:0008028,GO:0008150,GO:0008509,GO:0008514,GO:0015075,GO:0015318,GO:0015711,GO:0015718,GO:0015849,GO:0016020,GO:0016021,GO:0019866,GO:0022857,GO:0031090,GO:0031224,GO:0031300,GO:0031301,GO:0031304,GO:0031305,GO:0031966,GO:…						ko00000,ko02000,ko03029	2.A.105.1			Fungi	1GXEM@112252,3A5T9@33154,3P3U5@4751,KOG1589@1,KOG1589@2759	NA|NA|NA	C	Mediates the uptake of pyruvate into mitochondria
MA-00067-21	RPN11	ko:K03030	0.82278	1.0838	NoChange	Maintenance of mitochondrial structure and function	78898.MVEG_09818T0	6.8e-162	576.6	Fungi incertae sedis	GO:0000266,GO:0000502,GO:0003674,GO:0003824,GO:0004843,GO:0005575,GO:0005622,GO:0005623,GO:0005634,GO:0005737,GO:0005739,GO:0005829,GO:0005838,GO:0006464,GO:0006508,GO:0006511,GO:0006807,GO:0006996,GO:0007005,GO:0007031,GO:0007088,GO:0007346,GO:0008150,GO:0008152,GO:0008233,GO:0008234,GO:0008237,GO:0008541,GO:0009056,GO:0009057,GO:0009896,GO:0009987,GO:0010498,GO:0010564,GO:0010638,GO:0010965,GO:…		ko03050,ko05169,map03050,map05169	M00341			ko00000,ko00001,ko00002,ko01002,ko03051,ko04121				Fungi	1GSH1@112252,38G6Q@33154,3NV6C@4751,COG1310@1,KOG1555@2759	NA|NA|NA	O	Maintenance of mitochondrial structure and function
MA-00120-370	VAS1	ko:K01873	0.31162	0.56798	NoChange	Leucyl-tRNA synthetase, Domain 2	78898.MVEG_01913T0	0	1908.6	Fungi incertae sedis	GO:0000166,GO:0002181,GO:0003674,GO:0003824,GO:0004812,GO:0004832,GO:0005488,GO:0005524,GO:0005575,GO:0005622,GO:0005623,GO:0005737,GO:0005739,GO:0006082,GO:0006139,GO:0006399,GO:0006412,GO:0006418,GO:0006438,GO:0006518,GO:0006520,GO:0006725,GO:0006807,GO:0008144,GO:0008150,GO:0008152,GO:0009058,GO:0009059,GO:0009987,GO:0010467,GO:0016070,GO:0016874,GO:0016875,GO:0017076,GO:0019538,GO:0019752,GO:…	6.1.1.9	ko00970,map00970	M00359,M00360	R03665	RC00055,RC00523	ko00000,ko00001,ko00002,ko01000,ko01007,ko03016				Fungi	1GSFG@112252,38BX5@33154,3NXM3@4751,COG0525@1,KOG0432@2759	NA|NA|NA	J	Leucyl-tRNA synthetase, Domain 2
MA-00323-17	YLH47	ko:K17800	0.2265	0.47645	NoChange	LETM1-like protein	78898.MVEG_11050T0	3.9e-259	901	Fungi incertae sedis	GO:0005575,GO:0005622,GO:0005623,GO:0005737,GO:0005739,GO:0005740,GO:0005743,GO:0006412,GO:0006518,GO:0006807,GO:0006810,GO:0006811,GO:0006812,GO:0006813,GO:0006873,GO:0006875,GO:0006996,GO:0007005,GO:0007006,GO:0008104,GO:0008150,GO:0008152,GO:0009058,GO:0009059,GO:0009987,GO:0010467,GO:0015672,GO:0016020,GO:0016043,GO:0019538,GO:0019725,GO:0019866,GO:0030001,GO:0030003,GO:0031090,GO:0031966,GO:…		ko04139,map04139				ko00000,ko00001,ko02000,ko03029	2.A.97.1			Fungi	1GSPQ@112252,38BQV@33154,3NUF6@4751,KOG1043@1,KOG1043@2759	NA|NA|NA	S	LETM1-like protein
MA-00334-179		ko:K20523	0.16888	2.2066	NoChange	Las17-binding protein actin regulator	78898.MVEG_00881T0	1.2e-138	500	Fungi incertae sedis	GO:0001726,GO:0003674,GO:0003779,GO:0005488,GO:0005515,GO:0005543,GO:0005575,GO:0005622,GO:0005623,GO:0005737,GO:0005739,GO:0005829,GO:0005856,GO:0005886,GO:0005933,GO:0005935,GO:0005938,GO:0006810,GO:0006897,GO:0006996,GO:0007010,GO:0007015,GO:0008092,GO:0008150,GO:0008289,GO:0009987,GO:0015629,GO:0016020,GO:0016043,GO:0016192,GO:0022607,GO:0030029,GO:0030036,GO:0030427,GO:0030479,GO:0030863,GO:…						ko00000,ko04131				Fungi	1GVM7@112252,38FCU@33154,3NWAM@4751,COG2930@1,KOG1843@2759	NA|NA|NA	T	Las17-binding protein actin regulator
MA-00153-230		ko:K20523	0.42883	1.3596	NoChange	Las17-binding protein actin regulator	78898.MVEG_01706T0	1.8e-115	422.2	Fungi incertae sedis	GO:0001726,GO:0003674,GO:0003779,GO:0005488,GO:0005515,GO:0005543,GO:0005575,GO:0005622,GO:0005623,GO:0005737,GO:0005739,GO:0005829,GO:0005856,GO:0005886,GO:0005933,GO:0005935,GO:0005938,GO:0006810,GO:0006897,GO:0006996,GO:0007010,GO:0007015,GO:0008092,GO:0008150,GO:0008289,GO:0009987,GO:0015629,GO:0016020,GO:0016043,GO:0016192,GO:0022607,GO:0030029,GO:0030036,GO:0030427,GO:0030479,GO:0030863,GO:…						ko00000,ko04131				Fungi	1GW2M@112252,38FCU@33154,3NWAM@4751,COG2930@1,KOG1843@2759	NA|NA|NA	S	Las17-binding protein actin regulator
MA-00210-307	MDH1	ko:K00026	0.65074	0.89762	NoChange	lactate/malate dehydrogenase, NAD binding domain	78898.MVEG_06824T0	5.1e-171	607.1	Fungi incertae sedis	GO:0001300,GO:0001302,GO:0003674,GO:0003676,GO:0003723,GO:0003729,GO:0003824,GO:0005488,GO:0005575,GO:0005622,GO:0005623,GO:0005737,GO:0005739,GO:0005759,GO:0006082,GO:0006091,GO:0006099,GO:0006101,GO:0006108,GO:0007568,GO:0007569,GO:0008150,GO:0008152,GO:0009060,GO:0009987,GO:0015980,GO:0016491,GO:0016614,GO:0016615,GO:0016616,GO:0016999,GO:0017144,GO:0019752,GO:0030060,GO:0031974,GO:0032502,GO:…	1.1.1.37	ko00020,ko00270,ko00620,ko00630,ko00710,ko01100,ko01110,ko01120,ko01130,ko01200,map00020,map00270,map00620,map00630,map00710,map01100,map01110,map01120,map01130,map01200	M00009,M00011,M00012,M00168,M00171	R00342,R07136	RC00031	ko00000,ko00001,ko00002,ko01000				Fungi	1GS6Z@112252,38EX2@33154,3NWAG@4751,COG0039@1,KOG1494@2759	NA|NA|NA	C	lactate/malate dehydrogenase, NAD binding domain
MA-00268-19	TSC10	ko:K00039,ko:K04708	0.32204	1.3774	NoChange	KR domain	78898.MVEG_02292T0	1.6e-151	542.3	Fungi incertae sedis	GO:0000234,GO:0003674,GO:0003824,GO:0005575,GO:0005622,GO:0005623,GO:0005737,GO:0005739,GO:0005740,GO:0005741,GO:0005783,GO:0005789,GO:0005811,GO:0006464,GO:0006497,GO:0006505,GO:0006506,GO:0006629,GO:0006643,GO:0006644,GO:0006650,GO:0006661,GO:0006664,GO:0006665,GO:0006666,GO:0006793,GO:0006796,GO:0006807,GO:0008150,GO:0008152,GO:0008168,GO:0008170,GO:0008610,GO:0008654,GO:0008757,GO:0009058,GO:…	1.1.1.102,1.1.1.56	ko00040,ko00600,ko01100,map00040,map00600,map01100	M00094,M00099	R01895,R02978	RC00089,RC00102	ko00000,ko00001,ko00002,ko01000				Fungi	1GTIV@112252,38GV8@33154,3NYA2@4751,KOG1210@1,KOG1210@2759	NA|NA|NA	Q	KR domain
MA-00153-313	IDH2	ko:K00030	0.10472	0.61254	NoChange	Isocitrate/isopropylmalate dehydrogenase	78898.MVEG_01846T0	3e-196	691	Fungi incertae sedis	GO:0003674,GO:0003824,GO:0004448,GO:0004449,GO:0005575,GO:0005622,GO:0005623,GO:0005737,GO:0005739,GO:0005759,GO:0005962,GO:0006082,GO:0006091,GO:0006099,GO:0006101,GO:0006102,GO:0006520,GO:0006536,GO:0006537,GO:0006807,GO:0008150,GO:0008152,GO:0008652,GO:0009058,GO:0009060,GO:0009064,GO:0009084,GO:0009987,GO:0015980,GO:0016053,GO:0016491,GO:0016614,GO:0016616,GO:0016999,GO:0017144,GO:0019752,GO:…	1.1.1.41	ko00020,ko01100,ko01110,ko01120,ko01130,ko01200,ko01210,ko01230,map00020,map01100,map01110,map01120,map01130,map01200,map01210,map01230	M00009,M00010	R00709	RC00114	br01601,ko00000,ko00001,ko00002,ko01000				Fungi	1GRVZ@112252,38CQA@33154,3NVMJ@4751,COG0473@1,KOG0785@2759	NA|NA|NA	E	Isocitrate/isopropylmalate dehydrogenase
MA-00182-172	MAS1	ko:K17732	0.42806	0.59669	NoChange	Insulinase (Peptidase family M16)	78898.MVEG_08753T0	5.6e-248	863.2	Fungi incertae sedis	GO:0003674,GO:0003824,GO:0004175,GO:0004222,GO:0005488,GO:0005575,GO:0005622,GO:0005623,GO:0005737,GO:0005739,GO:0005740,GO:0005743,GO:0005746,GO:0005750,GO:0005759,GO:0006091,GO:0006119,GO:0006122,GO:0006139,GO:0006163,GO:0006508,GO:0006605,GO:0006626,GO:0006627,GO:0006725,GO:0006753,GO:0006793,GO:0006796,GO:0006807,GO:0006810,GO:0006839,GO:0006886,GO:0006996,GO:0007005,GO:0008104,GO:0008150,GO:…	3.4.24.64					ko00000,ko01000,ko01002,ko03029				Fungi	1GSCN@112252,38CT4@33154,3NU8R@4751,COG0612@1,KOG0960@2759	NA|NA|NA	O	Insulinase (Peptidase family M16)
MA-00120-280	MAS1	ko:K17732	0.0067676	0.53683	NoChange	Insulinase (Peptidase family M16)	78898.MVEG_08753T0	4.1e-251	873.6	Fungi incertae sedis	GO:0003674,GO:0003824,GO:0004175,GO:0004222,GO:0005488,GO:0005575,GO:0005622,GO:0005623,GO:0005737,GO:0005739,GO:0005740,GO:0005743,GO:0005746,GO:0005750,GO:0005759,GO:0006091,GO:0006119,GO:0006122,GO:0006139,GO:0006163,GO:0006508,GO:0006605,GO:0006626,GO:0006627,GO:0006725,GO:0006753,GO:0006793,GO:0006796,GO:0006807,GO:0006810,GO:0006839,GO:0006886,GO:0006996,GO:0007005,GO:0008104,GO:0008150,GO:…	3.4.24.64					ko00000,ko01000,ko01002,ko03029				Fungi	1GSCN@112252,38CT4@33154,3NU8R@4751,COG0612@1,KOG0960@2759	NA|NA|NA	O	Insulinase (Peptidase family M16)
MA-00268-15	GCD7	ko:K03754	0.83317	0.89974	NoChange	Initiation factor 2 subunit family	78898.MVEG_00315T0	4.4e-165	587.4	Fungi incertae sedis	GO:0002181,GO:0002183,GO:0003674,GO:0003676,GO:0003723,GO:0003743,GO:0005085,GO:0005488,GO:0005515,GO:0005575,GO:0005622,GO:0005623,GO:0005737,GO:0005739,GO:0005829,GO:0005851,GO:0006412,GO:0006413,GO:0006417,GO:0006446,GO:0006518,GO:0006807,GO:0008135,GO:0008150,GO:0008152,GO:0009058,GO:0009059,GO:0009889,GO:0009987,GO:0010467,GO:0010468,GO:0010556,GO:0010608,GO:0019222,GO:0019538,GO:0019899,GO:…		ko03013,map03013				ko00000,ko00001,ko03012				Fungi	1GVC1@112252,38D76@33154,3NUHV@4751,COG1184@1,KOG1465@2759	NA|NA|NA	J	Initiation factor 2 subunit family
MA-00112-55	RCF2		0.43344	0.59933	NoChange	Hypoxia induced protein conserved region	78898.MVEG_02230T0	2.9e-85	321.6	Fungi incertae sedis	GO:0005575,GO:0005622,GO:0005623,GO:0005737,GO:0005739,GO:0005740,GO:0005743,GO:0006996,GO:0007005,GO:0008150,GO:0008535,GO:0009987,GO:0016020,GO:0016021,GO:0016043,GO:0017004,GO:0019866,GO:0022607,GO:0031090,GO:0031224,GO:0031300,GO:0031301,GO:0031304,GO:0031305,GO:0031966,GO:0031967,GO:0031975,GO:0032592,GO:0032991,GO:0033108,GO:0033617,GO:0034622,GO:0043226,GO:0043227,GO:0043229,GO:0043231,GO:…										Fungi	1GUDQ@112252,28KP5@1,2QT50@2759,38DR6@33154,3P0GV@4751	NA|NA|NA	S	Hypoxia induced protein conserved region
MA-00055-255	GLO2	ko:K01069	0.99807	0.99705	NoChange	Hydroxyacylglutathione hydrolase C-terminus	78898.MVEG_05718T0	3.2e-141	507.7	Fungi incertae sedis	GO:0003674,GO:0003824,GO:0004416,GO:0005575,GO:0005622,GO:0005623,GO:0005737,GO:0005739,GO:0005759,GO:0006081,GO:0006082,GO:0006089,GO:0008150,GO:0008152,GO:0009056,GO:0009438,GO:0009636,GO:0009987,GO:0016787,GO:0016788,GO:0016790,GO:0019243,GO:0019752,GO:0031974,GO:0032787,GO:0042180,GO:0042182,GO:0042221,GO:0043226,GO:0043227,GO:0043229,GO:0043231,GO:0043233,GO:0043436,GO:0044237,GO:0044248,GO:…	3.1.2.6	ko00620,map00620		R01736	RC00004,RC00137	ko00000,ko00001,ko01000				Fungi	1GW1G@112252,38RE4@33154,3NW99@4751,COG0491@1,KOG0813@2759	NA|NA|NA	S	Hydroxyacylglutathione hydrolase C-terminus
MA-00112-174	HSP82	ko:K04079	0.13167	2.7698	NoChange	Hsp90 protein	78898.MVEG_06617T0	8.6e-306	1055.8	Fungi incertae sedis	GO:0000166,GO:0000491,GO:0000492,GO:0000723,GO:0003674,GO:0003824,GO:0005488,GO:0005515,GO:0005524,GO:0005575,GO:0005618,GO:0005622,GO:0005623,GO:0005737,GO:0005739,GO:0005829,GO:0005886,GO:0006139,GO:0006259,GO:0006457,GO:0006458,GO:0006605,GO:0006626,GO:0006725,GO:0006807,GO:0006810,GO:0006839,GO:0006886,GO:0006950,GO:0006970,GO:0006996,GO:0007005,GO:0007154,GO:0007165,GO:0008104,GO:0008144,GO:…		ko04141,ko04151,ko04217,ko04612,ko04621,ko04626,ko04657,ko04659,ko04914,ko04915,ko05200,ko05215,ko05418,map04141,map04151,map04217,map04612,map04621,map04626,map04657,map04659,map04914,map04915,map05200,map05215,map05418				ko00000,ko00001,ko01009,ko03029,ko03051,ko03110,ko04131,ko04147				Fungi	1GS03@112252,38B7K@33154,3NW2G@4751,COG0326@1,KOG0019@2759	NA|NA|NA	O	Hsp90 protein
MA-00101-77	HSP82	ko:K04079	0.13167	0.72131	NoChange	Hsp90 protein	78898.MVEG_06617T0	0	1195.3	Fungi incertae sedis	GO:0000166,GO:0000491,GO:0000492,GO:0000723,GO:0003674,GO:0003824,GO:0005488,GO:0005515,GO:0005524,GO:0005575,GO:0005618,GO:0005622,GO:0005623,GO:0005737,GO:0005739,GO:0005829,GO:0005886,GO:0006139,GO:0006259,GO:0006457,GO:0006458,GO:0006605,GO:0006626,GO:0006725,GO:0006807,GO:0006810,GO:0006839,GO:0006886,GO:0006950,GO:0006970,GO:0006996,GO:0007005,GO:0007154,GO:0007165,GO:0008104,GO:0008144,GO:…		ko04141,ko04151,ko04217,ko04612,ko04621,ko04626,ko04657,ko04659,ko04914,ko04915,ko05200,ko05215,ko05418,map04141,map04151,map04217,map04612,map04621,map04626,map04657,map04659,map04914,map04915,map05200,map05215,map05418				ko00000,ko00001,ko01009,ko03029,ko03051,ko03110,ko04131,ko04147				Fungi	1GS03@112252,38B7K@33154,3NW2G@4751,COG0326@1,KOG0019@2759	NA|NA|NA	O	Hsp90 protein
MA-00153-547	DBP2	ko:K12823	0.16888	1.5456	NoChange	Helicase conserved C-terminal domain	78898.MVEG_09167T0	3.8e-233	814.3	Fungi incertae sedis	GO:0000166,GO:0000184,GO:0000956,GO:0003674,GO:0003724,GO:0003824,GO:0004004,GO:0004386,GO:0005488,GO:0005524,GO:0005575,GO:0005622,GO:0005623,GO:0005634,GO:0005730,GO:0005737,GO:0005739,GO:0006139,GO:0006364,GO:0006396,GO:0006401,GO:0006402,GO:0006725,GO:0006807,GO:0008026,GO:0008144,GO:0008150,GO:0008152,GO:0008186,GO:0009056,GO:0009057,GO:0009892,GO:0009987,GO:0010467,GO:0010468,GO:0010501,GO:…	3.6.4.13	ko03040,ko05202,ko05205,map03040,map05202,map05205				ko00000,ko00001,ko01000,ko03009,ko03041				Fungi	1GSW2@112252,38D0V@33154,3NW4Z@4751,COG0513@1,KOG0331@2759	NA|NA|NA	A	Helicase conserved C-terminal domain
MA-00153-275	SUV3	ko:K17675	0.35337	0.67101	NoChange	Helicase conserved C-terminal domain	78898.MVEG_01753T0	5.6e-228	797	Fungi incertae sedis	GO:0000002,GO:0000003,GO:0000166,GO:0000177,GO:0000178,GO:0000372,GO:0000375,GO:0000376,GO:0000957,GO:0000959,GO:0000963,GO:0000965,GO:0001410,GO:0003674,GO:0003724,GO:0003824,GO:0004004,GO:0004386,GO:0005488,GO:0005524,GO:0005575,GO:0005622,GO:0005623,GO:0005737,GO:0005739,GO:0005759,GO:0006091,GO:0006139,GO:0006259,GO:0006260,GO:0006261,GO:0006264,GO:0006396,GO:0006401,GO:0006725,GO:0006807,GO:…	3.6.4.13					ko00000,ko01000,ko03029				Fungi	1GT7I@112252,38FBJ@33154,3NVKA@4751,KOG0953@1,KOG0953@2759	NA|NA|NA	A	Helicase conserved C-terminal domain
MA-00112-46	FIS1	ko:K17969	0.86847	0.91707	NoChange	Has a role in mitochondrial fission	78898.MVEG_06221T0	1.5e-74	285.4	Fungi incertae sedis	GO:0000266,GO:0001300,GO:0005575,GO:0005622,GO:0005623,GO:0005737,GO:0005739,GO:0005740,GO:0005741,GO:0005777,GO:0006996,GO:0007005,GO:0007031,GO:0007568,GO:0007569,GO:0008150,GO:0009987,GO:0016020,GO:0016043,GO:0016559,GO:0019867,GO:0031090,GO:0031966,GO:0031967,GO:0031968,GO:0031975,GO:0032502,GO:0042579,GO:0043226,GO:0043227,GO:0043229,GO:0043231,GO:0044422,GO:0044424,GO:0044429,GO:0044444,GO:…		ko04137,ko04139,map04137,map04139				ko00000,ko00001,ko03029				Fungi	1GU7D@112252,3A3F6@33154,3P1Y3@4751,KOG3364@1,KOG3364@2759	NA|NA|NA	M	Has a role in mitochondrial fission
MA-00213-280	SMY2	ko:K18730	0.94154	0.9512	NoChange	GYF domain	78898.MVEG_10220T0	1e-171	611.3	Fungi incertae sedis	GO:0005575,GO:0005622,GO:0005623,GO:0005737,GO:0005739,GO:0005783,GO:0005789,GO:0005829,GO:0006810,GO:0006888,GO:0006996,GO:0006997,GO:0008104,GO:0008150,GO:0009987,GO:0012505,GO:0016020,GO:0016043,GO:0016192,GO:0019898,GO:0031081,GO:0031503,GO:0031984,GO:0033036,GO:0034613,GO:0034629,GO:0042175,GO:0043226,GO:0043227,GO:0043229,GO:0043231,GO:0044422,GO:0044424,GO:0044425,GO:0044432,GO:0044444,GO:…						ko00000,ko03019				Fungi	1GTNB@112252,38UDY@33154,3NUVE@4751,KOG1862@1,KOG1862@2759	NA|NA|NA	S	GYF domain
MA-00055-145	YPT31	ko:K07904,ko:K07905	0.2657	0.65314	NoChange	GTP-binding Protein	78898.MVEG_10655T0	3.3e-115	421	Fungi	GO:0000003,GO:0000166,GO:0000212,GO:0000226,GO:0000278,GO:0000281,GO:0000910,GO:0000922,GO:0001882,GO:0001883,GO:0003674,GO:0003824,GO:0003924,GO:0005488,GO:0005525,GO:0005575,GO:0005622,GO:0005623,GO:0005628,GO:0005737,GO:0005739,GO:0005740,GO:0005741,GO:0005768,GO:0005794,GO:0005802,GO:0005819,GO:0005856,GO:0005933,GO:0005935,GO:0005938,GO:0006810,GO:0006886,GO:0006887,GO:0006996,GO:0007010,GO:…		ko04144,ko04152,ko04961,ko04962,ko04972,map04144,map04152,map04961,map04962,map04972				ko00000,ko00001,ko04031,ko04131,ko04147				Fungi	38FAA@33154,3NV4U@4751,COG1100@1,KOG0087@2759	NA|NA|NA	U	GTP-binding Protein
MA-00190-86	IRA2	ko:K08052	0.29836	0.45753	NoChange	GTPase-activator protein for Ras-like GTPases	78898.MVEG_06112T0	0	4496	Fungi incertae sedis	GO:0000302,GO:0003674,GO:0005096,GO:0005575,GO:0005622,GO:0005623,GO:0005737,GO:0005739,GO:0005783,GO:0005789,GO:0005829,GO:0005886,GO:0006950,GO:0006979,GO:0008047,GO:0008150,GO:0009266,GO:0009409,GO:0009628,GO:0009636,GO:0009898,GO:0009966,GO:0009968,GO:0009987,GO:0010035,GO:0010038,GO:0010646,GO:0010648,GO:0012505,GO:0016020,GO:0016021,GO:0023051,GO:0023057,GO:0030234,GO:0030695,GO:0031224,GO:…		ko01521,ko04010,ko04014,map01521,map04010,map04014				ko00000,ko00001				Fungi	1GSBJ@112252,38EMB@33154,3NX3S@4751,KOG1826@1,KOG1826@2759	NA|NA|NA	V	GTPase-activator protein for Ras-like GTPases
MA-00090-489	GDB1	ko:K01196	0.22879	1.622	NoChange	Glycogen debranching enzyme, glucanotransferase domain	78898.MVEG_03946T0	0	2379	Fungi incertae sedis	GO:0000272,GO:0003674,GO:0003824,GO:0004133,GO:0004134,GO:0004135,GO:0004553,GO:0005575,GO:0005622,GO:0005623,GO:0005737,GO:0005739,GO:0005975,GO:0005976,GO:0005977,GO:0005980,GO:0006073,GO:0006091,GO:0006112,GO:0008150,GO:0008152,GO:0009056,GO:0009057,GO:0009251,GO:0009987,GO:0015926,GO:0015980,GO:0016052,GO:0016740,GO:0016757,GO:0016758,GO:0016787,GO:0016798,GO:0043170,GO:0043226,GO:0043227,GO:…	2.4.1.25,3.2.1.33	ko00500,ko01100,ko01110,map00500,map01100,map01110		R02109,R02111	RC00049	ko00000,ko00001,ko01000		GH13		Fungi	1GSN4@112252,38BRH@33154,3NU7F@4751,COG3408@1,KOG3625@2759	NA|NA|NA	G	Glycogen debranching enzyme, glucanotransferase domain
MA-00189-415		ko:K01126,ko:K18694	0.68939	1.4931	NoChange	Glycerophosphoryl diester phosphodiesterase family	78898.MVEG_03161T0	1.9e-154	552	Fungi incertae sedis	GO:0003674,GO:0003824,GO:0004620,GO:0004629,GO:0005575,GO:0005622,GO:0005623,GO:0005737,GO:0005739,GO:0005783,GO:0005811,GO:0006629,GO:0006644,GO:0006650,GO:0006793,GO:0006796,GO:0008081,GO:0008150,GO:0008152,GO:0009056,GO:0009395,GO:0009987,GO:0012505,GO:0016042,GO:0016298,GO:0016787,GO:0016788,GO:0019637,GO:0034478,GO:0034479,GO:0042578,GO:0043226,GO:0043227,GO:0043228,GO:0043229,GO:0043231,GO:…	3.1.4.46	ko00564,map00564		R01030,R01470,R02027	RC00017,RC00425	ko00000,ko00001,ko01000				Fungi	1GTV2@112252,38DAY@33154,3NZDE@4751,COG0584@1,KOG2258@2759	NA|NA|NA	C	Glycerophosphoryl diester phosphodiesterase family
MA-00073-646	GPD	ko:K00134	0.089774	1.952	NoChange	Glyceraldehyde 3-phosphate dehydrogenase, NAD binding domain	78898.MVEG_06884T0	4e-168	597.4	Fungi incertae sedis	GO:0001932,GO:0001934,GO:0003674,GO:0003676,GO:0003682,GO:0003723,GO:0003824,GO:0004365,GO:0005488,GO:0005575,GO:0005576,GO:0005618,GO:0005622,GO:0005623,GO:0005634,GO:0005737,GO:0005739,GO:0005811,GO:0005829,GO:0005886,GO:0005975,GO:0005996,GO:0006006,GO:0006007,GO:0006082,GO:0006090,GO:0006091,GO:0006094,GO:0006096,GO:0006139,GO:0006163,GO:0006164,GO:0006165,GO:0006725,GO:0006732,GO:0006733,GO:…	1.2.1.12	ko00010,ko00710,ko01100,ko01110,ko01120,ko01130,ko01200,ko01230,ko04066,ko05010,map00010,map00710,map01100,map01110,map01120,map01130,map01200,map01230,map04066,map05010	M00001,M00002,M00003,M00165,M00166,M00308,M00552	R01061	RC00149	ko00000,ko00001,ko00002,ko01000,ko04131,ko04147				Fungi	1GSDR@112252,38DPH@33154,3NUCI@4751,COG0057@1,KOG0657@2759	NA|NA|NA	G	Glyceraldehyde 3-phosphate dehydrogenase, NAD binding domain
MA-00210-156	GPD	ko:K00134	0.014251	0.56032	NoChange	Glyceraldehyde 3-phosphate dehydrogenase, NAD binding domain	78898.MVEG_05252T0	4.5e-167	594	Fungi incertae sedis	GO:0001932,GO:0001934,GO:0003674,GO:0003676,GO:0003682,GO:0003723,GO:0003824,GO:0004365,GO:0005488,GO:0005575,GO:0005576,GO:0005618,GO:0005622,GO:0005623,GO:0005634,GO:0005737,GO:0005739,GO:0005811,GO:0005829,GO:0005886,GO:0005975,GO:0005996,GO:0006006,GO:0006007,GO:0006082,GO:0006090,GO:0006091,GO:0006094,GO:0006096,GO:0006139,GO:0006163,GO:0006164,GO:0006165,GO:0006725,GO:0006732,GO:0006733,GO:…	1.2.1.12	ko00010,ko00710,ko01100,ko01110,ko01120,ko01130,ko01200,ko01230,ko04066,ko05010,map00010,map00710,map01100,map01110,map01120,map01130,map01200,map01230,map04066,map05010	M00001,M00002,M00003,M00165,M00166,M00308,M00552	R01061	RC00149	ko00000,ko00001,ko00002,ko01000,ko04131,ko04147				Fungi	1GSDR@112252,38DPH@33154,3NUCI@4751,COG0057@1,KOG0657@2759	NA|NA|NA	G	Glyceraldehyde 3-phosphate dehydrogenase, NAD binding domain
MA-00334-537		ko:K17714	0.16868	0.54637	NoChange	Glutathione S-transferase N-terminal domain	78898.MVEG_05684T0	1.3e-109	403.3	Fungi incertae sedis	GO:0001401,GO:0005575,GO:0005622,GO:0005623,GO:0005737,GO:0005739,GO:0005740,GO:0005741,GO:0006996,GO:0007005,GO:0007006,GO:0007008,GO:0008150,GO:0009987,GO:0016020,GO:0016043,GO:0019867,GO:0031090,GO:0031966,GO:0031967,GO:0031968,GO:0031975,GO:0032991,GO:0043226,GO:0043227,GO:0043229,GO:0043231,GO:0044422,GO:0044424,GO:0044425,GO:0044429,GO:0044444,GO:0044446,GO:0044455,GO:0044464,GO:0061024,GO:…						ko00000,ko02000,ko03029	1.B.33.3			Fungi	1GTJZ@112252,39XGM@33154,3P11S@4751,KOG3028@1,KOG3028@2759	NA|NA|NA	U	Glutathione S-transferase N-terminal domain
MA-00120-397		ko:K17776	0.15814	0.36132	NoChange	Glutathione S-transferase N-terminal domain	78898.MVEG_12117T0	4.3e-114	418.3	Fungi incertae sedis	GO:0001401,GO:0005575,GO:0005622,GO:0005623,GO:0005737,GO:0005739,GO:0005740,GO:0005741,GO:0006605,GO:0006626,GO:0006810,GO:0006839,GO:0006886,GO:0006996,GO:0007005,GO:0007006,GO:0008104,GO:0008150,GO:0009987,GO:0015031,GO:0015833,GO:0016020,GO:0016043,GO:0017038,GO:0019867,GO:0031090,GO:0031966,GO:0031967,GO:0031968,GO:0031975,GO:0032991,GO:0033036,GO:0033365,GO:0034613,GO:0042886,GO:0043226,GO:…						ko00000,ko03029				Fungi	1GU2D@112252,3A0AJ@33154,3P1I9@4751,KOG3028@1,KOG3028@2759	NA|NA|NA	U	Glutathione S-transferase N-terminal domain
MA-00120-363	GPX2	ko:K00432	0.10293	1.46	NoChange	Glutathione peroxidase	78898.MVEG_08562T0	4.5e-65	254.6	Fungi incertae sedis	GO:0000302,GO:0003674,GO:0003824,GO:0004601,GO:0005575,GO:0005622,GO:0005623,GO:0005737,GO:0005739,GO:0005829,GO:0006950,GO:0006979,GO:0008150,GO:0008152,GO:0008379,GO:0009056,GO:0009636,GO:0009987,GO:0010035,GO:0016209,GO:0016491,GO:0016684,GO:0016999,GO:0017001,GO:0017144,GO:0019725,GO:0033554,GO:0034599,GO:0034614,GO:0035690,GO:0042221,GO:0042493,GO:0042542,GO:0042592,GO:0042737,GO:0042743,GO:…	1.11.1.9	ko00480,ko00590,ko04918,map00480,map00590,map04918		R00274,R07034,R07035	RC00011,RC00982	ko00000,ko00001,ko01000				Fungi	1GTQC@112252,3A1XE@33154,3P24F@4751,COG0386@1,KOG1651@2759	NA|NA|NA	O	Glutathione peroxidase
MA-00120-552	TTR1	ko:K03676	0.32509	1.6171	NoChange	Glutaredoxin	78898.MVEG_00624T0	1.1e-34	152.5	Fungi	GO:0000302,GO:0000303,GO:0000305,GO:0003674,GO:0003824,GO:0004364,GO:0004601,GO:0004602,GO:0005575,GO:0005622,GO:0005623,GO:0005634,GO:0005737,GO:0005739,GO:0005829,GO:0006464,GO:0006518,GO:0006575,GO:0006749,GO:0006790,GO:0006801,GO:0006807,GO:0006950,GO:0006979,GO:0008150,GO:0008152,GO:0009636,GO:0009987,GO:0010035,GO:0010731,GO:0015035,GO:0015036,GO:0015037,GO:0015038,GO:0016209,GO:0016491,GO:…						ko00000,ko03110			iMM904.YDR513W	Fungi	3A8AE@33154,3P6QI@4751,COG0695@1,KOG1752@2759	NA|NA|NA	O	Glutaredoxin
MA-00184-350	TTR1	ko:K03676	0.41589	1.3909	NoChange	Glutaredoxin	78898.MVEG_07185T0	4.9e-32	143.7	Fungi incertae sedis	GO:0003674,GO:0003824,GO:0004364,GO:0004601,GO:0004602,GO:0005575,GO:0005622,GO:0005623,GO:0005634,GO:0005737,GO:0005739,GO:0005829,GO:0006464,GO:0006518,GO:0006575,GO:0006749,GO:0006790,GO:0006807,GO:0006950,GO:0006979,GO:0008150,GO:0008152,GO:0009636,GO:0009987,GO:0010731,GO:0015036,GO:0016209,GO:0016491,GO:0016667,GO:0016684,GO:0016740,GO:0016765,GO:0019538,GO:0033554,GO:0034599,GO:0034641,GO:…						ko00000,ko03110			iMM904.YDR513W	Fungi	1GXU8@112252,3A8AE@33154,3P6QI@4751,COG0695@1,KOG1752@2759	NA|NA|NA	O	Glutaredoxin
MA-00326-84	TTR1	ko:K03676	0.73286	1.1653	NoChange	Glutaredoxin	78898.MVEG_06738T0	1.3e-38	165.6	Fungi incertae sedis	GO:0003674,GO:0003824,GO:0004364,GO:0004601,GO:0004602,GO:0005575,GO:0005622,GO:0005623,GO:0005634,GO:0005737,GO:0005739,GO:0005829,GO:0006464,GO:0006518,GO:0006575,GO:0006749,GO:0006790,GO:0006807,GO:0006950,GO:0006979,GO:0008150,GO:0008152,GO:0009636,GO:0009987,GO:0010731,GO:0015036,GO:0016209,GO:0016491,GO:0016667,GO:0016684,GO:0016740,GO:0016765,GO:0019538,GO:0033554,GO:0034599,GO:0034641,GO:…						ko00000,ko03110			iMM904.YDR513W	Fungi	1GUD5@112252,3A8AE@33154,3P6QI@4751,COG0695@1,KOG1752@2759	NA|NA|NA	O	Glutaredoxin
MA-00184-312	GRX5	ko:K07390	0.48558	0.72747	NoChange	Glutaredoxin	78898.MVEG_09559T0	7.2e-72	276.6	Fungi incertae sedis	GO:0003674,GO:0003824,GO:0005488,GO:0005575,GO:0005622,GO:0005623,GO:0005737,GO:0005739,GO:0005759,GO:0006790,GO:0006807,GO:0006950,GO:0006970,GO:0006979,GO:0008150,GO:0008152,GO:0009628,GO:0009987,GO:0010467,GO:0015035,GO:0015036,GO:0015037,GO:0015038,GO:0016043,GO:0016226,GO:0016491,GO:0016667,GO:0016740,GO:0016782,GO:0019538,GO:0022607,GO:0031163,GO:0031974,GO:0033554,GO:0034599,GO:0036455,GO:…						ko00000,ko03029,ko03110				Fungi	1GTSZ@112252,3A1XT@33154,3P2U5@4751,COG0278@1,KOG0911@2759	NA|NA|NA	O	Glutaredoxin
MA-00297-510	GLN4	ko:K01886	0.13999	1.6192	NoChange	Glutaminyl-tRNA synthetase, non-specific RNA binding region part 1	78898.MVEG_11681T0	0	1506.5	Fungi incertae sedis	GO:0002181,GO:0003674,GO:0003676,GO:0003723,GO:0003729,GO:0003824,GO:0004812,GO:0004819,GO:0005488,GO:0005575,GO:0005622,GO:0005623,GO:0005737,GO:0005739,GO:0005829,GO:0006082,GO:0006139,GO:0006399,GO:0006412,GO:0006418,GO:0006425,GO:0006518,GO:0006520,GO:0006725,GO:0006807,GO:0008150,GO:0008152,GO:0009058,GO:0009059,GO:0009987,GO:0010467,GO:0016070,GO:0016874,GO:0016875,GO:0019538,GO:0019752,GO:…	6.1.1.18	ko00970,ko01100,map00970,map01100	M00359,M00360	R03652	RC00055,RC00523	ko00000,ko00001,ko00002,ko01000,ko01007,ko03016				Fungi	1GSID@112252,38CYZ@33154,3NUV0@4751,COG0008@1,KOG1148@2759	NA|NA|NA	J	Glutaminyl-tRNA synthetase, non-specific RNA binding region part 1
MA-00073-492	GDH3	ko:K00262	0.99869	0.99942	NoChange	Glu/Leu/Phe/Val dehydrogenase, dimerisation domain	78898.MVEG_05331T0	3.2e-257	894	Fungi incertae sedis	GO:0001505,GO:0003674,GO:0003824,GO:0004353,GO:0004354,GO:0005575,GO:0005576,GO:0005622,GO:0005623,GO:0005634,GO:0005737,GO:0005739,GO:0005829,GO:0006082,GO:0006520,GO:0006536,GO:0006537,GO:0006541,GO:0006807,GO:0008150,GO:0008152,GO:0008652,GO:0009058,GO:0009064,GO:0009084,GO:0009987,GO:0010033,GO:0016053,GO:0016491,GO:0016638,GO:0016639,GO:0017144,GO:0019676,GO:0019740,GO:0019752,GO:0030447,GO:…	1.4.1.4	ko00220,ko00250,ko00910,ko01100,map00220,map00250,map00910,map01100		R00248	RC00006,RC02799	ko00000,ko00001,ko01000				Fungi	1GRXX@112252,38GEK@33154,3NVMC@4751,COG0334@1,KOG2250@2759	NA|NA|NA	E	Glu/Leu/Phe/Val dehydrogenase, dimerisation domain
MA-00210-49	GDH3	ko:K00262	0.53961	0.86803	NoChange	Glu/Leu/Phe/Val dehydrogenase, dimerisation domain	78898.MVEG_05331T0	4.5e-261	906.7	Fungi incertae sedis	GO:0001505,GO:0003674,GO:0003824,GO:0004353,GO:0004354,GO:0005575,GO:0005576,GO:0005622,GO:0005623,GO:0005634,GO:0005737,GO:0005739,GO:0005829,GO:0006082,GO:0006520,GO:0006536,GO:0006537,GO:0006541,GO:0006807,GO:0008150,GO:0008152,GO:0008652,GO:0009058,GO:0009064,GO:0009084,GO:0009987,GO:0010033,GO:0016053,GO:0016491,GO:0016638,GO:0016639,GO:0017144,GO:0019676,GO:0019740,GO:0019752,GO:0030447,GO:…	1.4.1.4	ko00220,ko00250,ko00910,ko01100,map00220,map00250,map00910,map01100		R00248	RC00006,RC02799	ko00000,ko00001,ko01000				Fungi	1GRXX@112252,38GEK@33154,3NVMC@4751,COG0334@1,KOG2250@2759	NA|NA|NA	E	Glu/Leu/Phe/Val dehydrogenase, dimerisation domain
MA-00090-277	ROT2	ko:K05546	0.77804	0.91004	NoChange	Galactose mutarotase-like	78898.MVEG_03698T0	0	1565.1	Fungi incertae sedis	GO:0000271,GO:0003674,GO:0003824,GO:0004553,GO:0005575,GO:0005622,GO:0005623,GO:0005737,GO:0005739,GO:0005783,GO:0005788,GO:0005975,GO:0005976,GO:0006073,GO:0006464,GO:0006486,GO:0006487,GO:0006491,GO:0006807,GO:0008150,GO:0008152,GO:0009058,GO:0009059,GO:0009100,GO:0009101,GO:0009250,GO:0009272,GO:0009987,GO:0010383,GO:0012505,GO:0015926,GO:0016051,GO:0016787,GO:0016798,GO:0017177,GO:0019538,GO:…	3.2.1.84	ko00510,ko01100,ko04141,map00510,map01100,map04141	M00073,M00074	R05980,R05981		ko00000,ko00001,ko00002,ko01000				Fungi	1GT7D@112252,3AJSB@33154,3NUB9@4751,COG1501@1,KOG1066@2759	NA|NA|NA	G	Galactose mutarotase-like
MA-00101-211	ARC15	ko:K05754	0.83395	1.1022	NoChange	Functions as component of the Arp2 3 complex which is involved in regulation of actin polymerization and together with an activating nucleation-promoting factor (NPF) mediates the formation of branched actin networks	78898.MVEG_08810T0	2.5e-56	224.9	Fungi incertae sedis	GO:0000001,GO:0000147,GO:0003674,GO:0003676,GO:0003723,GO:0003729,GO:0003779,GO:0005198,GO:0005488,GO:0005515,GO:0005575,GO:0005622,GO:0005623,GO:0005737,GO:0005739,GO:0005740,GO:0005741,GO:0005826,GO:0005856,GO:0005885,GO:0005937,GO:0005938,GO:0006810,GO:0006897,GO:0006996,GO:0007005,GO:0007010,GO:0007015,GO:0008064,GO:0008092,GO:0008150,GO:0009987,GO:0010638,GO:0015629,GO:0016020,GO:0016043,GO:…		ko04144,ko04666,ko04810,ko05100,ko05130,ko05131,ko05132,map04144,map04666,map04810,map05100,map05130,map05131,map05132				ko00000,ko00001,ko04131,ko04812				Fungi	1GU7R@112252,3A6NF@33154,3P59R@4751,KOG3380@1,KOG3380@2759	NA|NA|NA	Z	Functions as component of the Arp2 3 complex which is involved in regulation of actin polymerization and together with an activating nucleation-promoting factor (NPF) mediates the formation of branched actin networks
MA-00153-161		ko:K01557	0.78554	0.8919	NoChange	Fumarylacetoacetate (FAA) hydrolase family	78898.MVEG_09546T0	4.5e-107	394	Fungi incertae sedis	GO:0003674,GO:0003824,GO:0005575,GO:0005622,GO:0005623,GO:0005737,GO:0005739,GO:0006082,GO:0006520,GO:0006570,GO:0006572,GO:0006725,GO:0006807,GO:0008150,GO:0008152,GO:0009056,GO:0009063,GO:0009072,GO:0009074,GO:0009987,GO:0016054,GO:0016787,GO:0016822,GO:0016823,GO:0019439,GO:0019752,GO:0043226,GO:0043227,GO:0043229,GO:0043231,GO:0043436,GO:0044237,GO:0044238,GO:0044248,GO:0044281,GO:0044282,GO:…	3.7.1.5	ko00350,ko01100,ko01120,map00350,map01100,map01120		R01085	RC00326,RC00446	ko00000,ko00001,ko01000				Fungi	1GV3V@112252,39TDF@33154,3NV1X@4751,COG0179@1,KOG1535@2759	NA|NA|NA	Q	Fumarylacetoacetate (FAA) hydrolase family
MA-00184-330		ko:K01557	0.37818	0.74719	NoChange	Fumarylacetoacetate (FAA) hydrolase family	78898.MVEG_09546T0	1.3e-95	355.9	Fungi incertae sedis	GO:0003674,GO:0003824,GO:0005575,GO:0005622,GO:0005623,GO:0005737,GO:0005739,GO:0006082,GO:0006520,GO:0006570,GO:0006572,GO:0006725,GO:0006807,GO:0008150,GO:0008152,GO:0009056,GO:0009063,GO:0009072,GO:0009074,GO:0009987,GO:0016054,GO:0016787,GO:0016822,GO:0016823,GO:0019439,GO:0019752,GO:0043226,GO:0043227,GO:0043229,GO:0043231,GO:0043436,GO:0044237,GO:0044238,GO:0044248,GO:0044281,GO:0044282,GO:…	3.7.1.5	ko00350,ko01100,ko01120,map00350,map01100,map01120		R01085	RC00326,RC00446	ko00000,ko00001,ko01000				Fungi	1GV3V@112252,39TDF@33154,3NV1X@4751,COG0179@1,KOG1535@2759	NA|NA|NA	Q	Fumarylacetoacetate (FAA) hydrolase family
MA-00323-25	FBA1	ko:K01192,ko:K01624	0.77134	0.93611	NoChange	Fructose-bisphosphate aldolase class-II	78898.MVEG_11040T0	2.3e-190	671.4	Fungi incertae sedis	GO:0003674,GO:0003824,GO:0004332,GO:0005488,GO:0005575,GO:0005618,GO:0005622,GO:0005623,GO:0005737,GO:0005739,GO:0005829,GO:0005886,GO:0005975,GO:0005996,GO:0006006,GO:0006007,GO:0006082,GO:0006090,GO:0006091,GO:0006094,GO:0006096,GO:0006139,GO:0006163,GO:0006164,GO:0006165,GO:0006725,GO:0006732,GO:0006733,GO:0006734,GO:0006735,GO:0006753,GO:0006754,GO:0006757,GO:0006793,GO:0006796,GO:0006807,GO:…	3.2.1.25,4.1.2.13	ko00010,ko00030,ko00051,ko00511,ko00680,ko00710,ko01100,ko01110,ko01120,ko01130,ko01200,ko01230,ko04142,map00010,map00030,map00051,map00511,map00680,map00710,map01100,map01110,map01120,map01130,map01200,map01230,map04142	M00001,M00003,M00165,M00167,M00344,M00345	R01068,R01070,R01829,R02568	RC00438,RC00439,RC00603,RC00604	ko00000,ko00001,ko00002,ko01000				Fungi	1GSPV@112252,38EK5@33154,3NVQC@4751,COG0191@1,KOG4153@2759	NA|NA|NA	G	Fructose-bisphosphate aldolase class-II
MA-00055-178	FBA1	ko:K01192,ko:K01624	0.10481	0.66974	NoChange	Fructose-bisphosphate aldolase class-II	78898.MVEG_01225T0	7.5e-189	666.4	Fungi incertae sedis	GO:0003674,GO:0003824,GO:0004332,GO:0005488,GO:0005575,GO:0005618,GO:0005622,GO:0005623,GO:0005737,GO:0005739,GO:0005829,GO:0005886,GO:0005975,GO:0005996,GO:0006006,GO:0006007,GO:0006082,GO:0006090,GO:0006091,GO:0006094,GO:0006096,GO:0006139,GO:0006163,GO:0006164,GO:0006165,GO:0006725,GO:0006732,GO:0006733,GO:0006734,GO:0006735,GO:0006753,GO:0006754,GO:0006757,GO:0006793,GO:0006796,GO:0006807,GO:…	3.2.1.25,4.1.2.13	ko00010,ko00030,ko00051,ko00511,ko00680,ko00710,ko01100,ko01110,ko01120,ko01130,ko01200,ko01230,ko04142,map00010,map00030,map00051,map00511,map00680,map00710,map01100,map01110,map01120,map01130,map01200,map01230,map04142	M00001,M00003,M00165,M00167,M00344,M00345	R01068,R01070,R01829,R02568	RC00438,RC00439,RC00603,RC00604	ko00000,ko00001,ko00002,ko01000				Fungi	1GSPV@112252,38EK5@33154,3NVQC@4751,COG0191@1,KOG4153@2759	NA|NA|NA	G	Fructose-bisphosphate aldolase class-II
MA-00323-138	YFH1	ko:K19054	0.076589	0.57545	NoChange	Frataxin	78898.MVEG_11212T0	9.4e-60	236.1	Fungi	GO:0003674,GO:0003824,GO:0004322,GO:0005488,GO:0005506,GO:0005575,GO:0005622,GO:0005623,GO:0005737,GO:0005739,GO:0005759,GO:0006464,GO:0006518,GO:0006575,GO:0006725,GO:0006749,GO:0006778,GO:0006779,GO:0006783,GO:0006790,GO:0006807,GO:0006873,GO:0006875,GO:0006879,GO:0006950,GO:0006979,GO:0006996,GO:0007005,GO:0008150,GO:0008152,GO:0008198,GO:0008199,GO:0009058,GO:0009987,GO:0016043,GO:0016226,GO:…	1.16.3.1	ko00860,map00860		R00078	RC02758	ko00000,ko00001,ko01000,ko03029				Fungi	3A3XZ@33154,3P5HA@4751,COG1965@1,KOG3413@2759	NA|NA|NA	P	Frataxin
MA-00268-174	MIS1	ko:K00288	0.79927	0.95247	NoChange	Formate--tetrahydrofolate ligase	78898.MVEG_02344T0	0	1746.9	Fungi incertae sedis	GO:0000166,GO:0003674,GO:0003676,GO:0003677,GO:0003697,GO:0003824,GO:0004329,GO:0004477,GO:0004488,GO:0005488,GO:0005524,GO:0005575,GO:0005622,GO:0005623,GO:0005634,GO:0005737,GO:0005739,GO:0006082,GO:0006139,GO:0006144,GO:0006575,GO:0006725,GO:0006730,GO:0006732,GO:0006760,GO:0006766,GO:0006767,GO:0006807,GO:0008144,GO:0008150,GO:0008152,GO:0009058,GO:0009108,GO:0009110,GO:0009112,GO:0009113,GO:…	1.5.1.5,3.5.4.9,6.3.4.3	ko00670,ko01100,map00670,map01100	M00141	R00943,R01220,R01655	RC00026,RC00111,RC00202,RC00578	ko00000,ko00001,ko00002,ko01000,ko04147				Fungi	1GRTI@112252,38DB3@33154,3NVZV@4751,COG2759@1,KOG4230@2759	NA|NA|NA	H	Formate--tetrahydrofolate ligase
MA-00072-282	SDH1	ko:K00234	0.0075941	0.58355	NoChange	Flavoprotein (FP) subunit of succinate dehydrogenase (SDH) that is involved in complex II of the mitochondrial electron transport chain and is responsible for transferring electrons from succinate to ubiquinone (coenzyme Q)	78898.MVEG_04747T0	0	1201.8	Fungi incertae sedis	GO:0000104,GO:0000166,GO:0001539,GO:0003674,GO:0003824,GO:0005488,GO:0005575,GO:0005622,GO:0005623,GO:0005737,GO:0005739,GO:0005740,GO:0005743,GO:0005746,GO:0005749,GO:0005829,GO:0005886,GO:0006082,GO:0006091,GO:0006099,GO:0006101,GO:0006105,GO:0006113,GO:0006119,GO:0006121,GO:0006139,GO:0006163,GO:0006725,GO:0006753,GO:0006793,GO:0006796,GO:0006807,GO:0006928,GO:0006950,GO:0006974,GO:0006996,GO:…	1.3.5.1	ko00020,ko00190,ko01100,ko01110,ko01120,ko01130,ko01200,ko04714,ko04932,ko05010,ko05012,ko05016,map00020,map00190,map01100,map01110,map01120,map01130,map01200,map04714,map04932,map05010,map05012,map05016	M00009,M00011,M00148	R02164	RC00045	ko00000,ko00001,ko00002,ko01000			iMM904.YJL045W,iMM904.YKL148C,iND750.YJL045W,iND750.YKL148C	Fungi	1GSJN@112252,38CSD@33154,3NWM6@4751,COG1053@1,KOG2403@2759	NA|NA|NA	C	Flavoprotein (FP) subunit of succinate dehydrogenase (SDH) that is involved in complex II of the mitochondrial electron transport chain and is responsible for transferring electrons from succinate to ubiquinone (coenzyme Q)
MA-00297-258	MSF1	ko:K01889	0.09538	1.7315	NoChange	Ferredoxin-fold anticodon binding domain	78898.MVEG_03849T0	1.2e-221	775.8	Fungi incertae sedis	GO:0000166,GO:0000959,GO:0003674,GO:0003824,GO:0004812,GO:0004826,GO:0005488,GO:0005524,GO:0005575,GO:0005622,GO:0005623,GO:0005737,GO:0005739,GO:0006082,GO:0006139,GO:0006399,GO:0006412,GO:0006418,GO:0006432,GO:0006518,GO:0006520,GO:0006725,GO:0006807,GO:0008144,GO:0008150,GO:0008152,GO:0009058,GO:0009059,GO:0009987,GO:0010467,GO:0016070,GO:0016874,GO:0016875,GO:0017076,GO:0019538,GO:0019752,GO:…	6.1.1.20	ko00970,map00970	M00359,M00360	R03660	RC00055,RC00523	ko00000,ko00001,ko00002,ko01000,ko01007,ko03016				Fungi	1GSAK@112252,38BR2@33154,3NVIG@4751,COG0016@1,KOG2783@2759	NA|NA|NA	J	Ferredoxin-fold anticodon binding domain
MA-00334-54	AIP2	ko:K21618	0.11505	0.62765	NoChange	FAD linked oxidases, C-terminal domain	78898.MVEG_12074T0	2.9e-248	864.4	Fungi incertae sedis	GO:0000166,GO:0003674,GO:0003779,GO:0003824,GO:0004457,GO:0004458,GO:0005488,GO:0005515,GO:0005575,GO:0005622,GO:0005623,GO:0005737,GO:0005739,GO:0005759,GO:0006082,GO:0006089,GO:0006091,GO:0008092,GO:0008150,GO:0008152,GO:0009056,GO:0009987,GO:0015980,GO:0016054,GO:0016491,GO:0016614,GO:0016898,GO:0019516,GO:0019752,GO:0022900,GO:0022904,GO:0031974,GO:0032787,GO:0036094,GO:0043167,GO:0043168,GO:…	1.1.99.40	ko00620,map00620		R11593	RC00044	ko00000,ko00001,ko01000				Fungi	1GRRY@112252,38DBR@33154,3NUGN@4751,COG0277@1,KOG1232@2759	NA|NA|NA	C	FAD linked oxidases, C-terminal domain
MA-00184-87	GUT2	ko:K00111	0.017474	1.9281	NoChange	FAD dependent oxidoreductase	78898.MVEG_09276T0	0	1352	Fungi incertae sedis	GO:0001302,GO:0003674,GO:0003824,GO:0004368,GO:0005575,GO:0005622,GO:0005623,GO:0005737,GO:0005739,GO:0005740,GO:0005741,GO:0005975,GO:0006066,GO:0006071,GO:0006072,GO:0006116,GO:0006139,GO:0006725,GO:0006732,GO:0006733,GO:0006734,GO:0006753,GO:0006793,GO:0006796,GO:0006807,GO:0007568,GO:0007569,GO:0008150,GO:0008152,GO:0009117,GO:0009331,GO:0009987,GO:0016020,GO:0016021,GO:0016491,GO:0016614,GO:…	1.1.5.3	ko00564,ko01110,map00564,map01110		R00848	RC00029	ko00000,ko00001,ko01000			iMM904.YIL155C,iND750.YIL155C	Fungi	1GS28@112252,38FKM@33154,3NU42@4751,COG0578@1,KOG0042@2759	NA|NA|NA	C	FAD dependent oxidoreductase
MA-00334-496	cprA	ko:K00327	0.10379	1.7647	NoChange	FAD binding domain	78898.MVEG_10577T0	0	1295	Fungi incertae sedis	GO:0003674,GO:0003824,GO:0003958,GO:0005575,GO:0005622,GO:0005623,GO:0005737,GO:0005739,GO:0005740,GO:0005741,GO:0005783,GO:0005789,GO:0006066,GO:0006091,GO:0006629,GO:0006694,GO:0006696,GO:0008150,GO:0008152,GO:0008202,GO:0008204,GO:0008610,GO:0009055,GO:0009058,GO:0009987,GO:0012505,GO:0016020,GO:0016125,GO:0016126,GO:0016128,GO:0016129,GO:0016491,GO:0016651,GO:0016653,GO:0019867,GO:0022900,GO:…	1.6.2.4					ko00000,ko01000			iMM904.YHR042W	Fungi	1GS0F@112252,38BIN@33154,3NUZ8@4751,COG0369@1,KOG1158@2759	NA|NA|NA	I	FAD binding domain
MA-00073-82	BNA4	ko:K00486	0.76265	0.89794	NoChange	FAD binding domain	78898.MVEG_10807T0	2.3e-257	894.4	Fungi incertae sedis	GO:0000166,GO:0003674,GO:0003824,GO:0004497,GO:0004502,GO:0005488,GO:0005575,GO:0005622,GO:0005623,GO:0005737,GO:0005739,GO:0005740,GO:0005741,GO:0005886,GO:0006082,GO:0006139,GO:0006520,GO:0006568,GO:0006576,GO:0006586,GO:0006725,GO:0006732,GO:0006733,GO:0006753,GO:0006793,GO:0006796,GO:0006807,GO:0006950,GO:0007154,GO:0008150,GO:0008152,GO:0009058,GO:0009072,GO:0009108,GO:0009117,GO:0009165,GO:…	1.14.13.9	ko00380,ko01100,map00380,map01100	M00038	R01960	RC00046	ko00000,ko00001,ko00002,ko01000				Fungi	1GSZI@112252,38H32@33154,3NUXH@4751,COG0654@1,KOG2614@2759	NA|NA|NA	C	FAD binding domain
MA-00112-188	OSM2	ko:K18561	0.088514	0.7265	NoChange	FAD binding domain	78898.MVEG_05574T0	0	1100.5	Fungi incertae sedis	GO:0003674,GO:0003824,GO:0005575,GO:0005622,GO:0005623,GO:0005737,GO:0005739,GO:0005783,GO:0005829,GO:0005886,GO:0006082,GO:0006091,GO:0006099,GO:0006101,GO:0006106,GO:0006139,GO:0006457,GO:0006725,GO:0006732,GO:0006753,GO:0006793,GO:0006796,GO:0006807,GO:0006950,GO:0008150,GO:0008152,GO:0009060,GO:0009117,GO:0009628,GO:0009987,GO:0012505,GO:0015980,GO:0016020,GO:0016156,GO:0016491,GO:0016627,GO:…						ko00000,ko01000			iMM904.YEL047C,iND750.YEL047C	Fungi	1GS8H@112252,38FMG@33154,3NU5S@4751,COG1053@1,COG5274@1,KOG0537@2759,KOG2404@2759	NA|NA|NA	C	FAD binding domain
MA-00297-182	COQ6	ko:K06126	0.11715	0.5667	NoChange	FAD binding domain	78898.MVEG_06251T0	9.9e-223	779.6	Fungi incertae sedis	GO:0003674,GO:0003824,GO:0004497,GO:0005575,GO:0005622,GO:0005623,GO:0005737,GO:0005739,GO:0005740,GO:0005743,GO:0006732,GO:0006733,GO:0006743,GO:0006744,GO:0008150,GO:0008152,GO:0008681,GO:0009058,GO:0009108,GO:0009987,GO:0016020,GO:0016491,GO:0016705,GO:0016709,GO:0016712,GO:0019866,GO:0031090,GO:0031966,GO:0031967,GO:0031975,GO:0042180,GO:0042181,GO:0043226,GO:0043227,GO:0043229,GO:0043231,GO:…		ko00130,ko01100,ko01110,map00130,map01100,map01110	M00128	R04982,R08773	RC02670	ko00000,ko00001,ko00002,ko01000				Fungi	1GSQ1@112252,38FN2@33154,3NV68@4751,COG0654@1,KOG3855@2759	NA|NA|NA	CH	FAD binding domain
MA-00073-58	LOS1	ko:K14288	0.11277	0.49779	NoChange	Exportin 1-like protein	78898.MVEG_10733T0	0	1512.3	Fungi incertae sedis	GO:0000049,GO:0000166,GO:0001882,GO:0001883,GO:0003674,GO:0003676,GO:0003723,GO:0005488,GO:0005515,GO:0005525,GO:0005575,GO:0005622,GO:0005623,GO:0005634,GO:0005635,GO:0005643,GO:0005737,GO:0005739,GO:0006403,GO:0006405,GO:0006409,GO:0006611,GO:0006810,GO:0006886,GO:0006913,GO:0008104,GO:0008150,GO:0008536,GO:0012505,GO:0015031,GO:0015833,GO:0015931,GO:0016020,GO:0016021,GO:0016363,GO:0017016,GO:…		ko03013,map03013				ko00000,ko00001,ko03016				Fungi	1GSYP@112252,38DUH@33154,3NUZ1@4751,KOG2021@1,KOG2021@2759	NA|NA|NA	JUY	Exportin 1-like protein
MA-00334-484	UNG1	ko:K03648	0.40915	0.64328	NoChange	Excises uracil residues from the DNA which can arise as a result of misincorporation of dUMP residues by DNA polymerase or due to deamination of cytosine	78898.MVEG_00803T0	2e-124	452.2	Fungi incertae sedis	GO:0003674,GO:0003824,GO:0004844,GO:0005575,GO:0005622,GO:0005623,GO:0005634,GO:0005737,GO:0005739,GO:0006139,GO:0006259,GO:0006281,GO:0006284,GO:0006285,GO:0006725,GO:0006807,GO:0006950,GO:0006974,GO:0008150,GO:0008152,GO:0009987,GO:0016787,GO:0016798,GO:0016799,GO:0019104,GO:0033554,GO:0034641,GO:0043170,GO:0043226,GO:0043227,GO:0043229,GO:0043231,GO:0044237,GO:0044238,GO:0044260,GO:0044424,GO:…	3.2.2.27	ko03410,ko05340,map03410,map05340				ko00000,ko00001,ko01000,ko03400				Fungi	1GRY1@112252,38HPB@33154,3NWWC@4751,COG0692@1,KOG2994@2759	NA|NA|NA	L	Excises uracil residues from the DNA which can arise as a result of misincorporation of dUMP residues by DNA polymerase or due to deamination of cytosine
MA-00213-415	POR1	ko:K15040	0.024396	0.62031	NoChange	Eukaryotic porin	78898.MVEG_10086T0	1.7e-146	525.4	Fungi incertae sedis	GO:0003674,GO:0005215,GO:0005216,GO:0005244,GO:0005253,GO:0005575,GO:0005622,GO:0005623,GO:0005737,GO:0005739,GO:0005740,GO:0005741,GO:0005886,GO:0006810,GO:0006811,GO:0006820,GO:0006839,GO:0006915,GO:0006996,GO:0007005,GO:0008150,GO:0008219,GO:0008308,GO:0008509,GO:0009987,GO:0012501,GO:0015075,GO:0015103,GO:0015267,GO:0015318,GO:0015698,GO:0015931,GO:0016020,GO:0016021,GO:0016043,GO:0019725,GO:…		ko04020,ko04022,ko04216,ko04217,ko04218,ko04621,ko04979,ko05012,ko05016,ko05166,map04020,map04022,map04216,map04217,map04218,map04621,map04979,map05012,map05016,map05166				ko00000,ko00001,ko02000,ko03029	1.B.8.1			Fungi	1GT16@112252,38G4B@33154,3NXEA@4751,KOG3126@1,KOG3126@2759	NA|NA|NA	P	Eukaryotic porin
MA-00334-462	POR1	ko:K15040	0.012591	0.53946	NoChange	Eukaryotic porin	78898.MVEG_00922T0	3e-143	514.6	Fungi incertae sedis	GO:0003674,GO:0005215,GO:0005216,GO:0005244,GO:0005253,GO:0005575,GO:0005622,GO:0005623,GO:0005737,GO:0005739,GO:0005740,GO:0005741,GO:0005886,GO:0006810,GO:0006811,GO:0006820,GO:0006839,GO:0006915,GO:0006996,GO:0007005,GO:0008150,GO:0008219,GO:0008308,GO:0008509,GO:0009987,GO:0012501,GO:0015075,GO:0015103,GO:0015267,GO:0015318,GO:0015698,GO:0015931,GO:0016020,GO:0016021,GO:0016043,GO:0019725,GO:…		ko04020,ko04022,ko04216,ko04217,ko04218,ko04621,ko04979,ko05012,ko05016,ko05166,map04020,map04022,map04216,map04217,map04218,map04621,map04979,map05012,map05016,map05166				ko00000,ko00001,ko02000,ko03029	1.B.8.1			Fungi	1GT16@112252,38G4B@33154,3NXEA@4751,KOG3126@1,KOG3126@2759	NA|NA|NA	P	Eukaryotic porin
MA-00120-582	TOM40	ko:K11518	0.37818	0.40024	NoChange	Eukaryotic porin	78898.MVEG_10542T0	6.3e-161	573.5	Fungi incertae sedis	GO:0003674,GO:0005215,GO:0005575,GO:0005622,GO:0005623,GO:0005737,GO:0005739,GO:0005740,GO:0005741,GO:0005742,GO:0006605,GO:0006626,GO:0006810,GO:0006839,GO:0006886,GO:0006996,GO:0007005,GO:0007006,GO:0007007,GO:0008104,GO:0008150,GO:0008320,GO:0008565,GO:0009987,GO:0015031,GO:0015399,GO:0015405,GO:0015450,GO:0015833,GO:0016020,GO:0016021,GO:0016043,GO:0017038,GO:0019867,GO:0022804,GO:0022857,GO:…		ko05014,map05014				ko00000,ko00001,ko02000,ko03029	3.A.8.1			Fungi	1GT54@112252,38FFD@33154,3NURF@4751,KOG3296@1,KOG3296@2759	NA|NA|NA	U	Eukaryotic porin
MA-00112-104		ko:K03263	0.14926	0.69846	NoChange	Eukaryotic elongation factor 5A hypusine, DNA-binding OB fold	78898.MVEG_02656T0	3.3e-75	287.7	Fungi incertae sedis	GO:0002181,GO:0002182,GO:0002184,GO:0003674,GO:0003676,GO:0003723,GO:0003743,GO:0003746,GO:0005488,GO:0005575,GO:0005622,GO:0005623,GO:0005737,GO:0005739,GO:0005829,GO:0005840,GO:0006412,GO:0006413,GO:0006414,GO:0006415,GO:0006417,GO:0006446,GO:0006448,GO:0006449,GO:0006452,GO:0006518,GO:0006807,GO:0008079,GO:0008135,GO:0008150,GO:0008152,GO:0009058,GO:0009059,GO:0009889,GO:0009891,GO:0009893,GO:…						ko00000,ko03012				Fungi	1GTD5@112252,39ZYU@33154,3P1UC@4751,COG0231@1,KOG3271@2759	NA|NA|NA	J	Eukaryotic elongation factor 5A hypusine, DNA-binding OB fold
MA-00297-408	NdufS4	ko:K03937	0.76265	0.76073	NoChange	ETC complex I subunit conserved region	78898.MVEG_10410T0	3e-63	248.1	Fungi incertae sedis	GO:0005575,GO:0005622,GO:0005623,GO:0005737,GO:0005739,GO:0005740,GO:0005743,GO:0005746,GO:0005747,GO:0016020,GO:0019866,GO:0030964,GO:0031090,GO:0031966,GO:0031967,GO:0031975,GO:0032991,GO:0043226,GO:0043227,GO:0043229,GO:0043231,GO:0044422,GO:0044424,GO:0044425,GO:0044429,GO:0044444,GO:0044446,GO:0044455,GO:0044464,GO:0045271,GO:0070469,GO:0098796,GO:0098798,GO:0098800,GO:0098803,GO:1902494,GO:…		ko00190,ko01100,ko04714,ko04723,ko04932,ko05010,ko05012,ko05016,map00190,map01100,map04714,map04723,map04932,map05010,map05012,map05016	M00143			ko00000,ko00001,ko00002	3.D.1.6			Fungi	1GUCS@112252,39W9V@33154,3P215@4751,KOG3389@1,KOG3389@2759	NA|NA|NA	C	ETC complex I subunit conserved region
MA-00213-85		ko:K03949	0.095788	0.34658	NoChange	ETC complex I subunit conserved region	78898.MVEG_00946T0	3.2e-57	227.6	Fungi incertae sedis	GO:0005575,GO:0005622,GO:0005623,GO:0005737,GO:0005739,GO:0005740,GO:0005743,GO:0016020,GO:0019866,GO:0031090,GO:0031966,GO:0031967,GO:0031975,GO:0043226,GO:0043227,GO:0043229,GO:0043231,GO:0044422,GO:0044424,GO:0044429,GO:0044444,GO:0044446,GO:0044464		ko00190,ko01100,ko04714,ko04723,ko04932,ko05010,ko05012,ko05016,map00190,map01100,map04714,map04723,map04932,map05010,map05012,map05016	M00146			ko00000,ko00001,ko00002	3.D.1.6			Fungi	1GU2F@112252,3A65M@33154,3P63R@4751,KOG3365@1,KOG3365@2759	NA|NA|NA	C	ETC complex I subunit conserved region
MA-00182-306	mge1	ko:K03687	0.22807	0.63247	NoChange	Essential component of the PAM complex, a complex required for the translocation of transit peptide-containing proteins from the inner membrane into the mitochondrial matrix in an ATP-dependent manner	78898.MVEG_09327T0	2.6e-84	318.5	Fungi incertae sedis	GO:0000166,GO:0000774,GO:0001405,GO:0003674,GO:0005488,GO:0005515,GO:0005575,GO:0005622,GO:0005623,GO:0005737,GO:0005739,GO:0005740,GO:0005743,GO:0005744,GO:0005759,GO:0006457,GO:0006605,GO:0006626,GO:0006790,GO:0006810,GO:0006839,GO:0006886,GO:0006996,GO:0007005,GO:0008104,GO:0008150,GO:0008152,GO:0009987,GO:0015031,GO:0015833,GO:0016020,GO:0016043,GO:0016226,GO:0017038,GO:0017076,GO:0019866,GO:…						ko00000,ko03029,ko03110				Fungi	1GTZT@112252,39SYX@33154,3NZQR@4751,COG0576@1,KOG3003@2759	NA|NA|NA	O	Essential component of the PAM complex, a complex required for the translocation of transit peptide-containing proteins from the inner membrane into the mitochondrial matrix in an ATP-dependent manner
MA-00210-205	AYR1	ko:K06123	0.26472	0.66598	NoChange	Enoyl-(Acyl carrier protein) reductase	78898.MVEG_05264T0	2.1e-133	481.9	Fungi incertae sedis	GO:0000140,GO:0003674,GO:0003824,GO:0004806,GO:0005575,GO:0005622,GO:0005623,GO:0005737,GO:0005739,GO:0005740,GO:0005741,GO:0005783,GO:0005811,GO:0006629,GO:0006638,GO:0006639,GO:0006641,GO:0006644,GO:0006650,GO:0006654,GO:0006793,GO:0006796,GO:0008150,GO:0008152,GO:0008610,GO:0008654,GO:0009056,GO:0009058,GO:0009987,GO:0012505,GO:0016020,GO:0016021,GO:0016042,GO:0016298,GO:0016491,GO:0016614,GO:…	1.1.1.101	ko00564,ko00565,ko01100,map00564,map00565,map01100		R02756,R04360	RC00029	ko00000,ko00001,ko01000				Fungi	1GTI8@112252,39VCH@33154,3P15W@4751,COG1028@1,KOG1209@2759	NA|NA|NA	Q	Enoyl-(Acyl carrier protein) reductase
MA-00153-446	ENO1	ko:K01689	0.22447	0.6405	NoChange	Enolase, N-terminal domain	78898.MVEG_02237T0	2.7e-228	797.7	Fungi incertae sedis	GO:0000015,GO:0000322,GO:0000323,GO:0000324,GO:0003674,GO:0003810,GO:0003824,GO:0004634,GO:0005488,GO:0005515,GO:0005575,GO:0005576,GO:0005618,GO:0005622,GO:0005623,GO:0005634,GO:0005737,GO:0005739,GO:0005773,GO:0005829,GO:0005886,GO:0005975,GO:0005996,GO:0006006,GO:0006007,GO:0006082,GO:0006090,GO:0006091,GO:0006094,GO:0006096,GO:0006139,GO:0006163,GO:0006164,GO:0006165,GO:0006725,GO:0006732,GO:…	4.2.1.11	ko00010,ko00680,ko01100,ko01110,ko01120,ko01130,ko01200,ko01230,ko03018,ko04066,map00010,map00680,map01100,map01110,map01120,map01130,map01200,map01230,map03018,map04066	M00001,M00002,M00003,M00346,M00394	R00658	RC00349	ko00000,ko00001,ko00002,ko01000,ko03019,ko04147			iMM904.YHR174W,iND750.YHR174W	Fungi	1GVIF@112252,38C66@33154,3NXC1@4751,COG0148@1,KOG2670@2759	NA|NA|NA	G	Enolase, N-terminal domain
MA-00101-360	ENO1	ko:K01689	0.043132	0.60804	NoChange	Enolase, N-terminal domain	78898.MVEG_02237T0	1.6e-228	798.5	Fungi incertae sedis	GO:0000015,GO:0000322,GO:0000323,GO:0000324,GO:0003674,GO:0003810,GO:0003824,GO:0004634,GO:0005488,GO:0005515,GO:0005575,GO:0005576,GO:0005618,GO:0005622,GO:0005623,GO:0005634,GO:0005737,GO:0005739,GO:0005773,GO:0005829,GO:0005886,GO:0005975,GO:0005996,GO:0006006,GO:0006007,GO:0006082,GO:0006090,GO:0006091,GO:0006094,GO:0006096,GO:0006139,GO:0006163,GO:0006164,GO:0006165,GO:0006725,GO:0006732,GO:…	4.2.1.11	ko00010,ko00680,ko01100,ko01110,ko01120,ko01130,ko01200,ko01230,ko03018,ko04066,map00010,map00680,map01100,map01110,map01120,map01130,map01200,map01230,map03018,map04066	M00001,M00002,M00003,M00346,M00394	R00658	RC00349	ko00000,ko00001,ko00002,ko01000,ko03019,ko04147			iMM904.YHR174W,iND750.YHR174W	Fungi	1GVIF@112252,38C66@33154,3NXC1@4751,COG0148@1,KOG2670@2759	NA|NA|NA	G	Enolase, N-terminal domain
MA-00073-636	ISC1	ko:K12351	0.47208	1.5182	NoChange	Endonuclease/Exonuclease/phosphatase family	78898.MVEG_02086T0	2.5e-182	645.2	Fungi incertae sedis	GO:0000322,GO:0000323,GO:0000324,GO:0003674,GO:0003824,GO:0004620,GO:0004629,GO:0005575,GO:0005622,GO:0005623,GO:0005737,GO:0005739,GO:0005740,GO:0005741,GO:0005773,GO:0005783,GO:0005886,GO:0006629,GO:0006643,GO:0006665,GO:0006672,GO:0006807,GO:0006950,GO:0006970,GO:0008081,GO:0008150,GO:0008152,GO:0008610,GO:0009056,GO:0009058,GO:0009628,GO:0009651,GO:0009987,GO:0012505,GO:0016020,GO:0016021,GO:…	3.1.4.12	ko00600,ko01100,ko04071,map00600,map01100,map04071		R02541	RC00017,RC00425	ko00000,ko00001,ko01000				Fungi	1GW68@112252,39U5K@33154,3NW9A@4751,KOG3873@1,KOG3873@2759	NA|NA|NA	T	Endonuclease/Exonuclease/phosphatase family
MA-00213-156	ERP1	ko:K20346	0.98452	0.98709	NoChange	emp24/gp25L/p24 family/GOLD	78898.MVEG_02966T0	1.9e-97	362.1	Fungi incertae sedis	GO:0005575,GO:0005622,GO:0005623,GO:0005737,GO:0005739,GO:0005783,GO:0005798,GO:0006621,GO:0006810,GO:0006888,GO:0008104,GO:0008150,GO:0009987,GO:0012505,GO:0016020,GO:0016021,GO:0016192,GO:0030134,GO:0030135,GO:0031224,GO:0031410,GO:0031982,GO:0032507,GO:0033036,GO:0033365,GO:0034613,GO:0035437,GO:0043226,GO:0043227,GO:0043229,GO:0043231,GO:0044424,GO:0044425,GO:0044444,GO:0044464,GO:0045185,GO:…						ko00000,ko02000,ko04131	9.B.188			Fungi	1GUBW@112252,38HEZ@33154,3NVYE@4751,KOG1690@1,KOG1690@2759	NA|NA|NA	U	emp24/gp25L/p24 family/GOLD
MA-00153-423	TEF1	ko:K03231	0.036042	0.71102	NoChange	Elongation factor	78898.MVEG_01883T0	3e-97	361.3	Fungi incertae sedis	GO:0000166,GO:0000322,GO:0000323,GO:0000324,GO:0000329,GO:0001882,GO:0001883,GO:0002181,GO:0002182,GO:0003674,GO:0003676,GO:0003723,GO:0003746,GO:0003824,GO:0003924,GO:0005488,GO:0005515,GO:0005516,GO:0005525,GO:0005575,GO:0005618,GO:0005622,GO:0005623,GO:0005737,GO:0005739,GO:0005773,GO:0005774,GO:0005829,GO:0005840,GO:0005853,GO:0006403,GO:0006405,GO:0006409,GO:0006412,GO:0006414,GO:0006518,GO:…		ko03013,ko05134,map03013,map05134				ko00000,ko00001,ko03012,ko03016,ko03019,ko04131,ko04147				Fungi	1GRUM@112252,38G33@33154,3NU3J@4751,COG5256@1,KOG0052@2759	NA|NA|NA	J	Elongation factor
MA-00112-128	ETF1	ko:K03522	0.09538	0.61845	NoChange	Electron transfer flavoprotein domain	78898.MVEG_05543T0	4.9e-150	537.3	Fungi incertae sedis	GO:0000166,GO:0003674,GO:0003824,GO:0005488,GO:0005575,GO:0005622,GO:0005623,GO:0005737,GO:0005739,GO:0005759,GO:0006082,GO:0006091,GO:0006629,GO:0006631,GO:0006635,GO:0008150,GO:0008152,GO:0009055,GO:0009056,GO:0009062,GO:0009987,GO:0015980,GO:0016042,GO:0016054,GO:0016491,GO:0019395,GO:0019752,GO:0022900,GO:0022904,GO:0030258,GO:0031974,GO:0032787,GO:0033539,GO:0034440,GO:0036094,GO:0043167,GO:…						ko00000,ko04147				Fungi	1GSZ6@112252,38C7G@33154,3NVHF@4751,COG2025@1,KOG3954@2759	NA|NA|NA	C	Electron transfer flavoprotein domain
MA-00090-377	CIR1	ko:K03521	0.039968	0.53718	NoChange	Electron transfer flavoprotein	78898.MVEG_08040T0	5e-118	430.6	Fungi	GO:0003674,GO:0003824,GO:0005575,GO:0005622,GO:0005623,GO:0005737,GO:0005739,GO:0005829,GO:0006091,GO:0008150,GO:0008152,GO:0009055,GO:0009987,GO:0015980,GO:0016491,GO:0022900,GO:0022904,GO:0043226,GO:0043227,GO:0043229,GO:0043231,GO:0044237,GO:0044424,GO:0044444,GO:0044464,GO:0045333,GO:0055114						ko00000				Fungi	38DVE@33154,3NVB4@4751,COG2086@1,KOG3180@2759	NA|NA|NA	C	Electron transfer flavoprotein
MA-00067-279	GEM1	ko:K07870	0.98242	0.98477	NoChange	EF hand associated	78898.MVEG_05362T0	0	1184.5	Fungi incertae sedis	GO:0000001,GO:0000166,GO:0001882,GO:0001883,GO:0003674,GO:0003824,GO:0003924,GO:0005488,GO:0005509,GO:0005525,GO:0005575,GO:0005622,GO:0005623,GO:0005737,GO:0005739,GO:0005740,GO:0005741,GO:0005783,GO:0006996,GO:0007005,GO:0008150,GO:0009987,GO:0010570,GO:0010821,GO:0012505,GO:0016020,GO:0016043,GO:0016462,GO:0016787,GO:0016817,GO:0016818,GO:0017076,GO:0017111,GO:0019001,GO:0019867,GO:0022406,GO:…		ko04137,ko04214,map04137,map04214				ko00000,ko00001,ko01000,ko03029,ko04031				Fungi	1GT12@112252,38DXT@33154,3NUWP@4751,COG1100@1,KOG1707@2759	NA|NA|NA	V	EF hand associated
MA-00189-221	SPF1	ko:K01537,ko:K14950	0.44108	0.63613	NoChange	E1-E2 ATPase	78898.MVEG_03503T0	0	2161.3	Fungi incertae sedis	GO:0003674,GO:0003824,GO:0005215,GO:0005388,GO:0005575,GO:0005622,GO:0005623,GO:0005737,GO:0005739,GO:0005783,GO:0005789,GO:0005794,GO:0005801,GO:0005886,GO:0005887,GO:0006810,GO:0006811,GO:0006812,GO:0006816,GO:0006873,GO:0006874,GO:0006875,GO:0008150,GO:0008324,GO:0009987,GO:0012505,GO:0015075,GO:0015085,GO:0015318,GO:0015399,GO:0015405,GO:0015662,GO:0016020,GO:0016021,GO:0016462,GO:0016787,GO:…	3.6.3.8					ko00000,ko01000	3.A.3.10,3.A.3.2			Fungi	1GW2A@112252,38DBB@33154,3NV0M@4751,COG0474@1,KOG0209@2759	NA|NA|NA	P	E1-E2 ATPase
MA-00090-132	GCN1		0.10685	0.6149	NoChange	Domain of unknown function (DUF3554)	78898.MVEG_08342T0	0	4354.3	Fungi incertae sedis	GO:0000075,GO:0000077,GO:0000278,GO:0000302,GO:0001932,GO:0001934,GO:0003674,GO:0005488,GO:0005575,GO:0005622,GO:0005623,GO:0005737,GO:0005739,GO:0005829,GO:0005840,GO:0006417,GO:0006446,GO:0006448,GO:0006950,GO:0006974,GO:0006979,GO:0007049,GO:0007093,GO:0007154,GO:0007165,GO:0007346,GO:0008047,GO:0008150,GO:0009267,GO:0009268,GO:0009605,GO:0009628,GO:0009636,GO:0009719,GO:0009889,GO:0009890,GO:…										Fungi	1GS7X@112252,38G0Y@33154,3NU88@4751,KOG1242@1,KOG1242@2759	NA|NA|NA	J	Domain of unknown function (DUF3554)
MA-00139-316		ko:K09531	0.8011	1.1136	NoChange	Domain of unknown function (DUF3395)	78898.MVEG_04685T0	2e-295	1021.1	Fungi incertae sedis	GO:0005575,GO:0005622,GO:0005623,GO:0005737,GO:0005739,GO:0005740,GO:0006996,GO:0007005,GO:0007006,GO:0008150,GO:0009987,GO:0016020,GO:0016043,GO:0031090,GO:0031966,GO:0031967,GO:0031975,GO:0043226,GO:0043227,GO:0043229,GO:0043231,GO:0044422,GO:0044424,GO:0044429,GO:0044444,GO:0044446,GO:0044464,GO:0061024,GO:0071840						ko00000,ko03110				Fungi	1GRYH@112252,38FBU@33154,3NZ06@4751,COG0484@1,KOG0718@2759	NA|NA|NA	O	Domain of unknown function (DUF3395)
MA-00268-101	hulA	ko:K10591	0.059686	2.5198	NoChange	Domain Homologous to E6-AP Carboxyl Terminus with	78898.MVEG_11548T1	0	1394.8	Fungi incertae sedis	GO:0000151,GO:0000209,GO:0003674,GO:0003824,GO:0004842,GO:0005488,GO:0005515,GO:0005543,GO:0005575,GO:0005622,GO:0005623,GO:0005634,GO:0005737,GO:0005739,GO:0005768,GO:0005794,GO:0005886,GO:0005933,GO:0005934,GO:0005938,GO:0006325,GO:0006333,GO:0006355,GO:0006357,GO:0006403,GO:0006405,GO:0006406,GO:0006464,GO:0006508,GO:0006511,GO:0006513,GO:0006611,GO:0006807,GO:0006808,GO:0006810,GO:0006873,GO:…	2.3.2.26	ko04011,ko04120,ko04144,ko04530,ko05169,map04011,map04120,map04144,map04530,map05169				ko00000,ko00001,ko01000,ko03029,ko04121,ko04131				Fungi	1GSG7@112252,38CB4@33154,3NWRW@4751,COG5021@1,KOG0940@2759	NA|NA|NA	O	Domain Homologous to E6-AP Carboxyl Terminus with
MA-00320-106	hulA	ko:K10591	0.051589	1.9397	NoChange	Domain Homologous to E6-AP Carboxyl Terminus with	78898.MVEG_11548T1	0	1282.7	Fungi incertae sedis	GO:0000151,GO:0000209,GO:0003674,GO:0003824,GO:0004842,GO:0005488,GO:0005515,GO:0005543,GO:0005575,GO:0005622,GO:0005623,GO:0005634,GO:0005737,GO:0005739,GO:0005768,GO:0005794,GO:0005886,GO:0005933,GO:0005934,GO:0005938,GO:0006325,GO:0006333,GO:0006355,GO:0006357,GO:0006403,GO:0006405,GO:0006406,GO:0006464,GO:0006508,GO:0006511,GO:0006513,GO:0006611,GO:0006807,GO:0006808,GO:0006810,GO:0006873,GO:…	2.3.2.26	ko04011,ko04120,ko04144,ko04530,ko05169,map04011,map04120,map04144,map04530,map05169				ko00000,ko00001,ko01000,ko03029,ko04121,ko04131				Fungi	1GSG7@112252,38CB4@33154,3NWRW@4751,COG5021@1,KOG0940@2759	NA|NA|NA	O	Domain Homologous to E6-AP Carboxyl Terminus with
MA-00189-458	UFD4	ko:K10590	0.13032	0.61793	NoChange	Domain Homologous to E6-AP Carboxyl Terminus with	78898.MVEG_03140T0	0	1743.8	Fungi incertae sedis	GO:0000209,GO:0003674,GO:0003824,GO:0004842,GO:0005575,GO:0005622,GO:0005623,GO:0005634,GO:0005737,GO:0005739,GO:0006464,GO:0006508,GO:0006511,GO:0006513,GO:0006807,GO:0008150,GO:0008152,GO:0009056,GO:0009057,GO:0009889,GO:0009890,GO:0009892,GO:0009987,GO:0010556,GO:0010558,GO:0010605,GO:0010992,GO:0010994,GO:0016043,GO:0016567,GO:0016740,GO:0019219,GO:0019222,GO:0019538,GO:0019725,GO:0019787,GO:…	2.3.2.26	ko04120,map04120				ko00000,ko00001,ko01000,ko04121				Fungi	1GSPF@112252,38DVI@33154,3NWRE@4751,COG5021@1,KOG0168@2759,KOG0170@2759	NA|NA|NA	O	Domain Homologous to E6-AP Carboxyl Terminus with
MA-00091-1	RPO21	ko:K03006	0.63057	1.3212	NoChange	DNA-dependent RNA polymerase catalyzes the transcription of DNA into RNA using the four ribonucleoside triphosphates as substrates	78898.MVEG_08006T0	0	2879.4	Fungi incertae sedis	GO:0000228,GO:0000428,GO:0000731,GO:0000785,GO:0000790,GO:0003674,GO:0003676,GO:0003677,GO:0005488,GO:0005575,GO:0005622,GO:0005623,GO:0005634,GO:0005654,GO:0005665,GO:0005694,GO:0005737,GO:0005739,GO:0006139,GO:0006259,GO:0006281,GO:0006301,GO:0006351,GO:0006366,GO:0006725,GO:0006807,GO:0006950,GO:0006974,GO:0008150,GO:0008152,GO:0009058,GO:0009059,GO:0009987,GO:0010467,GO:0010494,GO:0016070,GO:…	2.7.7.6	ko00230,ko00240,ko01100,ko03020,ko05016,ko05168,ko05169,map00230,map00240,map01100,map03020,map05016,map05168,map05169	M00180	R00435,R00441,R00442,R00443	RC02795	br01611,ko00000,ko00001,ko00002,ko01000,ko03021,ko03400				Fungi	1GT4Z@112252,38CEW@33154,3NWQ7@4751,COG0086@1,KOG0260@2759	NA|NA|NA	K	DNA-dependent RNA polymerase catalyzes the transcription of DNA into RNA using the four ribonucleoside triphosphates as substrates
MA-00270-18	RPB2	ko:K03010	0.70137	0.85779	NoChange	DNA-dependent RNA polymerase catalyzes the transcription of DNA into RNA using the four ribonucleoside triphosphates as substrates	78898.MVEG_04238T0	0	2321.2	Fungi incertae sedis	GO:0000228,GO:0000428,GO:0000775,GO:0000785,GO:0000790,GO:0000792,GO:0003674,GO:0003676,GO:0003677,GO:0003723,GO:0003729,GO:0005488,GO:0005575,GO:0005622,GO:0005623,GO:0005634,GO:0005654,GO:0005665,GO:0005694,GO:0005720,GO:0005721,GO:0005737,GO:0005739,GO:0006139,GO:0006325,GO:0006342,GO:0006351,GO:0006355,GO:0006366,GO:0006725,GO:0006807,GO:0006996,GO:0008150,GO:0008152,GO:0009058,GO:0009059,GO:…	2.7.7.6	ko00230,ko00240,ko01100,ko03020,ko05016,ko05169,map00230,map00240,map01100,map03020,map05016,map05169	M00180	R00435,R00441,R00442,R00443	RC02795	br01611,ko00000,ko00001,ko00002,ko01000,ko03021,ko03400				Fungi	1GS89@112252,38F5S@33154,3NW78@4751,COG0085@1,KOG0214@2759	NA|NA|NA	K	DNA-dependent RNA polymerase catalyzes the transcription of DNA into RNA using the four ribonucleoside triphosphates as substrates
MA-00334-401	MYO2	ko:K10357	0.11713	0.42975	NoChange	DIL	78898.MVEG_00810T0	0	2590.8	Fungi incertae sedis	GO:0000001,GO:0000003,GO:0000011,GO:0000131,GO:0000132,GO:0000146,GO:0000226,GO:0000278,GO:0000281,GO:0000902,GO:0000910,GO:0003006,GO:0003674,GO:0003774,GO:0003779,GO:0003824,GO:0005488,GO:0005515,GO:0005516,GO:0005575,GO:0005622,GO:0005623,GO:0005737,GO:0005739,GO:0005856,GO:0005884,GO:0005933,GO:0005934,GO:0005935,GO:0005937,GO:0005938,GO:0006403,GO:0006810,GO:0006887,GO:0006904,GO:0006928,GO:…						ko00000,ko03019,ko03029,ko04131,ko04812				Fungi	1GRSI@112252,3A94J@33154,3NV49@4751,COG5022@1,KOG0160@2759	NA|NA|NA	Z	DIL
MA-00055-320	PPX1	ko:K01514	0.97036	1.0261	NoChange	DHHA2	78898.MVEG_06372T0	1.2e-110	406.8	Fungi incertae sedis	GO:0003674,GO:0003824,GO:0004309,GO:0005575,GO:0005622,GO:0005623,GO:0005737,GO:0005739,GO:0005759,GO:0005829,GO:0005886,GO:0006082,GO:0006091,GO:0006112,GO:0006793,GO:0006797,GO:0006798,GO:0008150,GO:0008152,GO:0009056,GO:0009987,GO:0015980,GO:0016020,GO:0016462,GO:0016787,GO:0016817,GO:0016818,GO:0031974,GO:0043226,GO:0043227,GO:0043229,GO:0043231,GO:0043233,GO:0043436,GO:0044237,GO:0044248,GO:…	3.6.1.11	ko00230,map00230		R03409	RC00002	ko00000,ko00001,ko01000				Fungi	1GTZW@112252,38HGT@33154,3P0WK@4751,COG1227@1,KOG4129@2759	NA|NA|NA	C	DHHA2
MA-00153-133		ko:K07252,ko:K14655	0.13778	2.1078	NoChange	deaminase	78898.MVEG_09587T0	3.2e-53	215.3	Fungi incertae sedis	GO:0001522,GO:0003674,GO:0003824,GO:0005575,GO:0005622,GO:0005623,GO:0005737,GO:0005739,GO:0006139,GO:0006396,GO:0006399,GO:0006400,GO:0006725,GO:0006807,GO:0008033,GO:0008150,GO:0008152,GO:0009451,GO:0009982,GO:0009987,GO:0010467,GO:0016070,GO:0016853,GO:0016866,GO:0031119,GO:0034470,GO:0034641,GO:0034660,GO:0043170,GO:0043226,GO:0043227,GO:0043229,GO:0043231,GO:0043412,GO:0044237,GO:0044238,GO:…	3.6.1.43,5.4.99.28	ko00510,ko00740,ko01100,map00510,map00740,map01100		R01004,R09377	RC00002,RC00204	ko00000,ko00001,ko01000,ko03016				Fungi	1GUNS@112252,3A62Q@33154,3P5Y9@4751,COG0590@1,KOG1018@2759	NA|NA|NA	F	deaminase
MA-00320-55	CYT1	ko:K00413	0.12745	0.53307	NoChange	Cytochrome C1 family	78898.MVEG_02270T0	2.3e-122	444.9	Fungi incertae sedis	GO:0003674,GO:0003824,GO:0005575,GO:0005622,GO:0005623,GO:0005737,GO:0005739,GO:0005740,GO:0005743,GO:0005746,GO:0005750,GO:0005758,GO:0005829,GO:0006091,GO:0006119,GO:0006122,GO:0006139,GO:0006163,GO:0006164,GO:0006725,GO:0006753,GO:0006754,GO:0006793,GO:0006796,GO:0006807,GO:0006810,GO:0006811,GO:0006812,GO:0006839,GO:0008150,GO:0008152,GO:0009055,GO:0009058,GO:0009117,GO:0009123,GO:0009124,GO:…		ko00190,ko01100,ko02020,ko04260,ko04714,ko04932,ko05010,ko05012,ko05016,map00190,map01100,map02020,map04260,map04714,map04932,map05010,map05012,map05016	M00151,M00152			ko00000,ko00001,ko00002			iMM904.YOR065W,iND750.YOR065W	Fungi	1GSP9@112252,38BPE@33154,3NVYB@4751,COG2857@1,KOG3052@2759	NA|NA|NA	C	Cytochrome C1 family
MA-00189-312	COX4	ko:K02265	0.12908	0.19477	NoChange	Cytochrome c oxidase subunit Vb	78898.MVEG_04993T0	2.4e-70	271.6	Fungi incertae sedis	GO:0003674,GO:0005488,GO:0005575,GO:0005622,GO:0005623,GO:0005737,GO:0005739,GO:0005740,GO:0005743,GO:0005746,GO:0005751,GO:0006091,GO:0006119,GO:0006123,GO:0006139,GO:0006163,GO:0006164,GO:0006725,GO:0006753,GO:0006754,GO:0006793,GO:0006796,GO:0006807,GO:0006810,GO:0006811,GO:0006812,GO:0006839,GO:0008150,GO:0008152,GO:0008270,GO:0009058,GO:0009060,GO:0009117,GO:0009123,GO:0009124,GO:0009126,GO:…		ko00190,ko01100,ko04260,ko04714,ko04932,ko05010,ko05012,ko05016,map00190,map01100,map04260,map04714,map04932,map05010,map05012,map05016	M00154			ko00000,ko00001,ko00002	3.D.4.11,3.D.4.8			Fungi	1GUAF@112252,3A6JQ@33154,3P5BA@4751,KOG3352@1,KOG3352@2759	NA|NA|NA	C	Cytochrome c oxidase subunit Vb
MA-00101-150	cox5	ko:K02263	0.30889	0.74651	NoChange	Cytochrome c oxidase subunit IV	78898.MVEG_02760T0	2.6e-72	278.1	Fungi incertae sedis	GO:0003674,GO:0003824,GO:0004129,GO:0005215,GO:0005575,GO:0005622,GO:0005623,GO:0005737,GO:0005739,GO:0005740,GO:0005743,GO:0005746,GO:0005751,GO:0006091,GO:0006119,GO:0006123,GO:0006139,GO:0006163,GO:0006725,GO:0006753,GO:0006793,GO:0006796,GO:0006807,GO:0006810,GO:0006811,GO:0006812,GO:0008150,GO:0008152,GO:0008324,GO:0009055,GO:0009060,GO:0009117,GO:0009123,GO:0009126,GO:0009141,GO:0009144,GO:…		ko00190,ko01100,ko04260,ko04714,ko04932,ko05010,ko05012,ko05016,map00190,map01100,map04260,map04714,map04932,map05010,map05012,map05016	M00154			ko00000,ko00001,ko00002	3.D.4.11,3.D.4.8		iMM904.YNL052W,iND750.YNL052W	Fungi	1GTWU@112252,3A1S5@33154,3P5Q4@4751,KOG4075@1,KOG4075@2759	NA|NA|NA	C	Cytochrome c oxidase subunit IV
MA-00120-281	SDH4	ko:K00237,ko:K17791	0.011066	0.51931	NoChange	CybS, succinate dehydrogenase cytochrome B small subunit	78898.MVEG_08754T0	3.5e-70	271.2	Fungi incertae sedis	GO:0003674,GO:0005488,GO:0005515,GO:0005575,GO:0005622,GO:0005623,GO:0005737,GO:0005739,GO:0005740,GO:0005743,GO:0005746,GO:0005749,GO:0006082,GO:0006091,GO:0006099,GO:0006101,GO:0006119,GO:0006121,GO:0006139,GO:0006163,GO:0006605,GO:0006626,GO:0006725,GO:0006753,GO:0006793,GO:0006796,GO:0006807,GO:0006810,GO:0006839,GO:0006886,GO:0006915,GO:0006950,GO:0006970,GO:0006979,GO:0006996,GO:0007005,GO:…		ko00020,ko00190,ko01100,ko01110,ko01120,ko01130,ko01200,ko04714,ko04932,ko05010,ko05012,ko05016,map00020,map00190,map01100,map01110,map01120,map01130,map01200,map04714,map04932,map05010,map05012,map05016	M00009,M00011,M00148	R02164	RC00045	ko00000,ko00001,ko00002,ko02000,ko03029	3.A.8.1			Fungi	1GU2H@112252,3A1TE@33154,3P2TR@4751,KOG4097@1,KOG4097@2759	NA|NA|NA	CU	CybS, succinate dehydrogenase cytochrome B small subunit
MA-00182-312	ILV1	ko:K01754	0.084627	0.14345	NoChange	C-terminal regulatory domain of Threonine dehydratase	78898.MVEG_09333T0	2.7e-278	964.1	Fungi incertae sedis	GO:0003674,GO:0003824,GO:0004794,GO:0005575,GO:0005622,GO:0005623,GO:0005737,GO:0005739,GO:0006082,GO:0006520,GO:0006549,GO:0006566,GO:0006567,GO:0006807,GO:0008150,GO:0008152,GO:0008652,GO:0009056,GO:0009058,GO:0009063,GO:0009066,GO:0009068,GO:0009081,GO:0009082,GO:0009097,GO:0009987,GO:0016053,GO:0016054,GO:0016829,GO:0016840,GO:0016841,GO:0019752,GO:0043226,GO:0043227,GO:0043229,GO:0043231,GO:…	4.3.1.19	ko00260,ko00290,ko01100,ko01110,ko01130,ko01200,ko01230,map00260,map00290,map01100,map01110,map01130,map01200,map01230	M00570	R00220,R00996	RC00418,RC02600	ko00000,ko00001,ko00002,ko01000				Fungi	1GSSN@112252,38C3Z@33154,3NUWH@4751,COG1171@1,KOG1250@2759	NA|NA|NA	E	C-terminal regulatory domain of Threonine dehydratase
MA-00268-63	NDH51	ko:K03942	0.063034	0.23834	NoChange	Core subunit of the mitochondrial membrane respiratory chain NADH dehydrogenase (Complex I) that is believed to belong to the minimal assembly required for catalysis. Complex I functions in the transfer of electrons from NADH to the respiratory chain	78898.MVEG_02284T0	7.3e-264	916	Fungi incertae sedis	GO:0005575,GO:0005622,GO:0005623,GO:0005737,GO:0005739,GO:0005740,GO:0005743,GO:0016020,GO:0019866,GO:0031090,GO:0031966,GO:0031967,GO:0031975,GO:0043226,GO:0043227,GO:0043229,GO:0043231,GO:0044422,GO:0044424,GO:0044429,GO:0044444,GO:0044446,GO:0044464	1.6.5.3,1.6.99.3	ko00190,ko01100,ko04714,ko04723,ko04932,ko05010,ko05012,ko05016,map00190,map01100,map04714,map04723,map04932,map05010,map05012,map05016	M00143	R11945	RC00061	ko00000,ko00001,ko00002,ko01000	3.D.1.6			Fungi	1GT1J@112252,38DDI@33154,3NU1K@4751,COG1894@1,KOG2658@2759	NA|NA|NA	C	Core subunit of the mitochondrial membrane respiratory chain NADH dehydrogenase (Complex I) that is believed to belong to the minimal assembly required for catalysis. Complex I functions in the transfer of electrons from NADH to the respiratory chain
MA-00213-293	coq9	ko:K18587	0.090479	0.55456	NoChange	COQ9	78898.MVEG_00893T0	7.5e-96	357.1	Fungi incertae sedis	GO:0003674,GO:0005488,GO:0005575,GO:0005622,GO:0005623,GO:0005737,GO:0005739,GO:0005740,GO:0005743,GO:0006732,GO:0006733,GO:0006743,GO:0006744,GO:0008150,GO:0008152,GO:0008289,GO:0009058,GO:0009108,GO:0009987,GO:0016020,GO:0019866,GO:0031090,GO:0031966,GO:0031967,GO:0031975,GO:0042180,GO:0042181,GO:0043226,GO:0043227,GO:0043229,GO:0043231,GO:0044237,GO:0044249,GO:0044281,GO:0044283,GO:0044422,GO:…						ko00000			iMM904.YLR201C	Fungi	1GTJN@112252,3A0N2@33154,3P1VM@4751,COG5590@1,KOG2969@2759	NA|NA|NA	S	COQ9
MA-00101-284	CCS1	ko:K04569,ko:K07213	0.079844	0.62596	NoChange	Copper/zinc superoxide dismutase (SODC)	78898.MVEG_09119T0	2.1e-122	445.3	Fungi incertae sedis	GO:0000041,GO:0000302,GO:0000303,GO:0000305,GO:0003674,GO:0003824,GO:0004784,GO:0005488,GO:0005507,GO:0005575,GO:0005576,GO:0005615,GO:0005622,GO:0005623,GO:0005634,GO:0005737,GO:0005739,GO:0005740,GO:0005743,GO:0005829,GO:0006801,GO:0006810,GO:0006811,GO:0006812,GO:0006825,GO:0006950,GO:0006979,GO:0008047,GO:0008150,GO:0008152,GO:0008270,GO:0009636,GO:0009987,GO:0010035,GO:0015680,GO:0016020,GO:…		ko04978,ko05014,map04978,map05014				ko00000,ko00001				Fungi	1GSXT@112252,38K69@33154,3NZHY@4751,COG2608@1,KOG4656@2759	NA|NA|NA	P	Copper/zinc superoxide dismutase (SODC)
MA-00334-71	QCR7	ko:K00417	0.92901	1.0799	NoChange	Component of the ubiquinol-cytochrome c reductase complex (complex III or cytochrome b-c1 complex), which is part of the mitochondrial respiratory chain	78898.MVEG_11995T0	9.3e-54	216.1	Fungi incertae sedis	GO:0005575,GO:0005622,GO:0005623,GO:0005737,GO:0005739,GO:0005740,GO:0005743,GO:0005746,GO:0005750,GO:0006091,GO:0006119,GO:0006122,GO:0006139,GO:0006163,GO:0006725,GO:0006753,GO:0006793,GO:0006796,GO:0006807,GO:0006996,GO:0007005,GO:0008150,GO:0008152,GO:0009060,GO:0009117,GO:0009123,GO:0009126,GO:0009141,GO:0009144,GO:0009150,GO:0009161,GO:0009167,GO:0009199,GO:0009205,GO:0009259,GO:0009987,GO:…		ko00190,ko01100,ko04260,ko04714,ko04932,ko05010,ko05012,ko05016,map00190,map01100,map04260,map04714,map04932,map05010,map05012,map05016	M00152			ko00000,ko00001,ko00002				Fungi	1GUQV@112252,3A4MP@33154,3P446@4751,KOG3440@1,KOG3440@2759	NA|NA|NA	C	Component of the ubiquinol-cytochrome c reductase complex (complex III or cytochrome b-c1 complex), which is part of the mitochondrial respiratory chain
MA-00182-97	RIP1	ko:K00411	0.089774	0.60187	NoChange	Component of the ubiquinol-cytochrome c reductase complex (complex III or cytochrome b-c1 complex), which is a respiratory chain that generates an electrochemical potential coupled to ATP synthesis	78898.MVEG_09450T0	3e-137	494.6	Fungi incertae sedis	GO:0005575,GO:0005622,GO:0005623,GO:0005737,GO:0005739,GO:0005740,GO:0005743,GO:0005746,GO:0005750,GO:0006091,GO:0006119,GO:0006122,GO:0006139,GO:0006163,GO:0006725,GO:0006753,GO:0006793,GO:0006796,GO:0006807,GO:0008150,GO:0008152,GO:0009060,GO:0009117,GO:0009123,GO:0009126,GO:0009141,GO:0009144,GO:0009150,GO:0009161,GO:0009167,GO:0009199,GO:0009205,GO:0009259,GO:0009987,GO:0015980,GO:0016020,GO:…	1.10.2.2	ko00190,ko01100,ko02020,ko04260,ko04714,ko04932,ko05010,ko05012,ko05016,map00190,map01100,map02020,map04260,map04714,map04932,map05010,map05012,map05016	M00151,M00152			ko00000,ko00001,ko00002,ko01000				Fungi	1GSJR@112252,38FY0@33154,3NV7A@4751,COG0723@1,KOG1671@2759	NA|NA|NA	C	Component of the ubiquinol-cytochrome c reductase complex (complex III or cytochrome b-c1 complex), which is a respiratory chain that generates an electrochemical potential coupled to ATP synthesis
MA-00090-447	MIC10	ko:K17784	0.26049	0.70115	NoChange	Component of the MICOS complex, a large protein complex of the mitochondrial inner membrane that plays crucial roles in the maintenance of crista junctions, inner membrane architecture, and formation of contact sites to the outer membrane	78898.MVEG_07364T0	1.2e-34	152.1	Fungi incertae sedis	GO:0005575,GO:0005622,GO:0005623,GO:0005737,GO:0005739,GO:0005740,GO:0005743,GO:0006996,GO:0007005,GO:0007006,GO:0007007,GO:0008150,GO:0009987,GO:0016020,GO:0016021,GO:0016043,GO:0019866,GO:0031090,GO:0031224,GO:0031300,GO:0031301,GO:0031304,GO:0031305,GO:0031966,GO:0031967,GO:0031975,GO:0032592,GO:0032991,GO:0042407,GO:0043226,GO:0043227,GO:0043229,GO:0043231,GO:0044284,GO:0044422,GO:0044424,GO:…						ko00000,ko03029				Fungi	1GUPB@112252,3A8K4@33154,3P6M1@4751,KOG4604@1,KOG4604@2759	NA|NA|NA	S	Component of the MICOS complex, a large protein complex of the mitochondrial inner membrane that plays crucial roles in the maintenance of crista junctions, inner membrane architecture, and formation of contact sites to the outer membrane
MA-00334-565	NdufA6	ko:K03950	0.090479	0.52976	NoChange	Complex1_LYR-like	78898.MVEG_11881T0	1.9e-59	235	Fungi incertae sedis	GO:0005575,GO:0005622,GO:0005623,GO:0005737,GO:0005739,GO:0005740,GO:0005743,GO:0016020,GO:0019866,GO:0031090,GO:0031966,GO:0031967,GO:0031975,GO:0043226,GO:0043227,GO:0043229,GO:0043231,GO:0044422,GO:0044424,GO:0044429,GO:0044444,GO:0044446,GO:0044464		ko00190,ko01100,ko04714,ko04723,ko04932,ko05010,ko05012,ko05016,map00190,map01100,map04714,map04723,map04932,map05010,map05012,map05016	M00146			ko00000,ko00001,ko00002	3.D.1.6			Fungi	1GU68@112252,3A1I4@33154,3P2TN@4751,KOG3426@1,KOG3426@2759	NA|NA|NA	C	Complex1_LYR-like
MA-00101-191		ko:K22069	0.095788	0.57411	NoChange	Complex 1 protein (LYR family)	78898.MVEG_08832T0	4.6e-32	143.7	Fungi incertae sedis	GO:0005575,GO:0005622,GO:0005623,GO:0005737,GO:0005739,GO:0005740,GO:0005743,GO:0005759,GO:0005829,GO:0006790,GO:0008150,GO:0008152,GO:0009987,GO:0016020,GO:0016043,GO:0016226,GO:0019866,GO:0019898,GO:0022607,GO:0031090,GO:0031163,GO:0031312,GO:0031314,GO:0031966,GO:0031967,GO:0031974,GO:0031975,GO:0032991,GO:0043226,GO:0043227,GO:0043229,GO:0043231,GO:0043233,GO:0044085,GO:0044237,GO:0044422,GO:…						ko00000,ko03029				Fungi	1GUFV@112252,3A8KB@33154,3P711@4751,KOG3801@1,KOG3801@2759	NA|NA|NA	A	Complex 1 protein (LYR family)
MA-00320-43	CIT1	ko:K01647	0.27256	1.9942	NoChange	Citrate synthase, C-terminal domain	78898.MVEG_01922T0	3.3e-217	760.8	Fungi incertae sedis	GO:0003674,GO:0003824,GO:0004108,GO:0005575,GO:0005622,GO:0005623,GO:0005737,GO:0005739,GO:0005759,GO:0005777,GO:0005975,GO:0006081,GO:0006082,GO:0006084,GO:0006091,GO:0006097,GO:0006099,GO:0006101,GO:0006139,GO:0006163,GO:0006195,GO:0006520,GO:0006536,GO:0006537,GO:0006637,GO:0006725,GO:0006732,GO:0006753,GO:0006790,GO:0006793,GO:0006796,GO:0006807,GO:0008150,GO:0008152,GO:0008652,GO:0009056,GO:…	2.3.3.1	ko00020,ko00630,ko01100,ko01110,ko01120,ko01130,ko01200,ko01210,ko01230,map00020,map00630,map01100,map01110,map01120,map01130,map01200,map01210,map01230	M00009,M00010,M00012,M00740	R00351	RC00004,RC00067	br01601,ko00000,ko00001,ko00002,ko01000				Fungi	1GSDT@112252,38CK5@33154,3NU5Z@4751,COG0372@1,KOG2617@2759	NA|NA|NA	C	Citrate synthase, C-terminal domain
MA-00268-24	CIT1	ko:K01647	0.14194	0.84519	NoChange	Citrate synthase, C-terminal domain	78898.MVEG_01922T0	4.4e-253	880.2	Fungi incertae sedis	GO:0003674,GO:0003824,GO:0004108,GO:0005575,GO:0005622,GO:0005623,GO:0005737,GO:0005739,GO:0005759,GO:0005777,GO:0005975,GO:0006081,GO:0006082,GO:0006084,GO:0006091,GO:0006097,GO:0006099,GO:0006101,GO:0006139,GO:0006163,GO:0006195,GO:0006520,GO:0006536,GO:0006537,GO:0006637,GO:0006725,GO:0006732,GO:0006753,GO:0006790,GO:0006793,GO:0006796,GO:0006807,GO:0008150,GO:0008152,GO:0008652,GO:0009056,GO:…	2.3.3.1	ko00020,ko00630,ko01100,ko01110,ko01120,ko01130,ko01200,ko01210,ko01230,map00020,map00630,map01100,map01110,map01120,map01130,map01200,map01210,map01230	M00009,M00010,M00012,M00740	R00351	RC00004,RC00067	br01601,ko00000,ko00001,ko00002,ko01000				Fungi	1GSDT@112252,38CK5@33154,3NU5Z@4751,COG0372@1,KOG2617@2759	NA|NA|NA	C	Citrate synthase, C-terminal domain
MA-00067-61	NEW1	ko:K03235	0.44375	0.38315	NoChange	Chromatin organization modifier domain	78898.MVEG_09858T0	0	1486.1	Fungi incertae sedis	GO:0000166,GO:0003674,GO:0003676,GO:0003723,GO:0003729,GO:0003824,GO:0005488,GO:0005524,GO:0005575,GO:0005622,GO:0005623,GO:0005737,GO:0005739,GO:0005844,GO:0006403,GO:0006405,GO:0006406,GO:0006611,GO:0006810,GO:0006886,GO:0006913,GO:0008104,GO:0008144,GO:0008150,GO:0008152,GO:0010467,GO:0015031,GO:0015833,GO:0015931,GO:0016462,GO:0016787,GO:0016817,GO:0016818,GO:0016887,GO:0016973,GO:0017076,GO:…						ko00000,ko03012				Fungi	1GRU1@112252,39DXA@33154,3NUZG@4751,COG0488@1,KOG0062@2759,KOG1242@1,KOG1242@2759	NA|NA|NA	B	Chromatin organization modifier domain
MA-00184-234	hsp10	ko:K04078	0.051589	0.5981	NoChange	Chaperonin 10 Kd subunit	78898.MVEG_07376T0	1.6e-43	181.8	Fungi incertae sedis	GO:0003674,GO:0005488,GO:0005515,GO:0005575,GO:0005622,GO:0005623,GO:0005737,GO:0005739,GO:0005759,GO:0006457,GO:0006458,GO:0006605,GO:0006626,GO:0006810,GO:0006839,GO:0006886,GO:0006950,GO:0006986,GO:0006996,GO:0007005,GO:0008104,GO:0008150,GO:0009987,GO:0010033,GO:0015031,GO:0015833,GO:0016043,GO:0017038,GO:0022607,GO:0030150,GO:0031974,GO:0033036,GO:0033365,GO:0034613,GO:0034622,GO:0035966,GO:…						ko00000,ko03029,ko03110				Fungi	1GU85@112252,3A5MZ@33154,3P5D4@4751,COG0234@1,KOG1641@2759	NA|NA|NA	O	Chaperonin 10 Kd subunit
MA-00182-162	hsp10	ko:K04078	0.0574	0.57273	NoChange	Chaperonin 10 Kd subunit	78898.MVEG_09467T0	1.5e-41	175.3	Fungi incertae sedis	GO:0003674,GO:0005488,GO:0005515,GO:0005575,GO:0005622,GO:0005623,GO:0005737,GO:0005739,GO:0005759,GO:0006457,GO:0006458,GO:0006605,GO:0006626,GO:0006810,GO:0006839,GO:0006886,GO:0006950,GO:0006986,GO:0006996,GO:0007005,GO:0008104,GO:0008150,GO:0009987,GO:0010033,GO:0015031,GO:0015833,GO:0016043,GO:0017038,GO:0022607,GO:0030150,GO:0031974,GO:0033036,GO:0033365,GO:0034613,GO:0034622,GO:0035966,GO:…						ko00000,ko03029,ko03110				Fungi	1GU85@112252,3A5MZ@33154,3P5D4@4751,COG0234@1,KOG1641@2759	NA|NA|NA	O	Chaperonin 10 Kd subunit
MA-00213-332	CDC48	ko:K13525	0.35337	1.6786	NoChange	Cell division protein 48 (CDC48) domain 2	78898.MVEG_00907T0	0	1518.8	Fungi incertae sedis	GO:0000070,GO:0000151,GO:0000153,GO:0000226,GO:0000228,GO:0000278,GO:0000280,GO:0000785,GO:0000790,GO:0000819,GO:0000835,GO:0000836,GO:0000837,GO:0000839,GO:0003674,GO:0003824,GO:0005488,GO:0005515,GO:0005575,GO:0005622,GO:0005623,GO:0005634,GO:0005694,GO:0005737,GO:0005739,GO:0005740,GO:0005741,GO:0005783,GO:0005789,GO:0005819,GO:0005829,GO:0005856,GO:0005937,GO:0006139,GO:0006355,GO:0006357,GO:…		ko04141,ko05134,map04141,map05134	M00400,M00403			ko00000,ko00001,ko00002,ko03019,ko04131,ko04147	3.A.16.1			Fungi	1GSI7@112252,38BWW@33154,3NWIH@4751,COG0464@1,KOG0730@2759	NA|NA|NA	O	Cell division protein 48 (CDC48) domain 2
MA-00334-302	CDC48	ko:K13525	0.50559	1.1626	NoChange	Cell division protein 48 (CDC48) domain 2	78898.MVEG_00907T0	0	1507.3	Fungi incertae sedis	GO:0000070,GO:0000151,GO:0000153,GO:0000226,GO:0000228,GO:0000278,GO:0000280,GO:0000785,GO:0000790,GO:0000819,GO:0000835,GO:0000836,GO:0000837,GO:0000839,GO:0003674,GO:0003824,GO:0005488,GO:0005515,GO:0005575,GO:0005622,GO:0005623,GO:0005634,GO:0005694,GO:0005737,GO:0005739,GO:0005740,GO:0005741,GO:0005783,GO:0005789,GO:0005819,GO:0005829,GO:0005856,GO:0005937,GO:0006139,GO:0006355,GO:0006357,GO:…		ko04141,ko05134,map04141,map05134	M00400,M00403			ko00000,ko00001,ko00002,ko03019,ko04131,ko04147	3.A.16.1			Fungi	1GSI7@112252,38BWW@33154,3NWIH@4751,COG0464@1,KOG0730@2759	NA|NA|NA	O	Cell division protein 48 (CDC48) domain 2
MA-00162-60	ECM42	ko:K00620	0.31162	0.72347	NoChange	Catalyzes two activities which are involved in the cyclic version of arginine biosynthesis the synthesis of acetylglutamate from glutamate and acetyl-CoA, and of ornithine by transacetylation between acetylornithine and glutamate	78898.MVEG_00445T0	3.4e-210	737.6	Fungi incertae sedis	GO:0003674,GO:0003824,GO:0004042,GO:0004358,GO:0005575,GO:0005622,GO:0005623,GO:0005737,GO:0005739,GO:0005759,GO:0006082,GO:0006520,GO:0006525,GO:0006526,GO:0006536,GO:0006591,GO:0006592,GO:0006807,GO:0008080,GO:0008150,GO:0008152,GO:0008652,GO:0009058,GO:0009064,GO:0009084,GO:0009987,GO:0016053,GO:0016407,GO:0016410,GO:0016740,GO:0016746,GO:0016747,GO:0019752,GO:0031974,GO:0043226,GO:0043227,GO:…	2.3.1.1,2.3.1.35	ko00220,ko01100,ko01110,ko01130,ko01210,ko01230,map00220,map01100,map01110,map01130,map01210,map01230	M00028	R00259,R02282	RC00004,RC00064	ko00000,ko00001,ko00002,ko01000				Fungi	1GS8K@112252,38H79@33154,3NVW6@4751,COG1364@1,KOG2786@2759	NA|NA|NA	E	Catalyzes two activities which are involved in the cyclic version of arginine biosynthesis the synthesis of acetylglutamate from glutamate and acetyl-CoA, and of ornithine by transacetylation between acetylornithine and glutamate
MA-00090-442	OPI3	ko:K00551	0.83395	0.93303	NoChange	Catalyzes the second two steps of the methylation pathway of phosphatidylcholine biosynthesis, the SAM-dependent methylation of phosphatidylmonomethylethanolamine (PMME) to phosphatidyldimethylethanolamine (PDME) and of PDME to phosphatidylcholine (PC)	78898.MVEG_03923T0	3.8e-93	347.8	Fungi incertae sedis	GO:0000003,GO:0000773,GO:0000909,GO:0003006,GO:0003674,GO:0003824,GO:0005575,GO:0005622,GO:0005623,GO:0005737,GO:0005739,GO:0005783,GO:0006629,GO:0006644,GO:0006650,GO:0006656,GO:0006793,GO:0006796,GO:0006807,GO:0007275,GO:0008150,GO:0008152,GO:0008168,GO:0008170,GO:0008610,GO:0008654,GO:0008757,GO:0009058,GO:0009987,GO:0012505,GO:0016020,GO:0016021,GO:0016740,GO:0016741,GO:0019637,GO:0019953,GO:…	2.1.1.17,2.1.1.71	ko00564,ko01100,ko01110,map00564,map01100,map01110	M00091	R01320,R02056,R03424	RC00003,RC00060,RC00181,RC00496	ko00000,ko00001,ko00002,ko01000				Fungi	1GTHP@112252,39SFQ@33154,3NVA9@4751,KOG4142@1,KOG4142@2759	NA|NA|NA	I	Catalyzes the second two steps of the methylation pathway of phosphatidylcholine biosynthesis, the SAM-dependent methylation of phosphatidylmonomethylethanolamine (PMME) to phosphatidyldimethylethanolamine (PDME) and of PDME to phosphatidylcholine (PC)
MA-00334-247	ADK1	ko:K00939	0.016579	0.51235	NoChange	Catalyzes the reversible transfer of the terminal phosphate group between ATP and AMP. Plays an important role in cellular energy homeostasis and in adenine nucleotide metabolism. Adenylate kinase activity is critical for regulation of the phosphate utilization and the AMP de novo biosynthesis pathways	78898.MVEG_10090T0	1.2e-117	429.5	Fungi incertae sedis	GO:0000166,GO:0003674,GO:0003824,GO:0004017,GO:0005488,GO:0005524,GO:0005575,GO:0005622,GO:0005623,GO:0005737,GO:0005739,GO:0005740,GO:0005758,GO:0006139,GO:0006163,GO:0006164,GO:0006172,GO:0006259,GO:0006260,GO:0006261,GO:0006270,GO:0006725,GO:0006753,GO:0006793,GO:0006796,GO:0006807,GO:0008144,GO:0008150,GO:0008152,GO:0009058,GO:0009059,GO:0009117,GO:0009123,GO:0009124,GO:0009126,GO:0009127,GO:…	2.7.4.3	ko00230,ko00730,ko01100,ko01110,ko01130,map00230,map00730,map01100,map01110,map01130	M00049	R00127,R01547,R11319	RC00002	ko00000,ko00001,ko00002,ko01000,ko04147				Fungi	1GT34@112252,38FS5@33154,3NV5B@4751,COG0563@1,KOG3078@2759	NA|NA|NA	F	Catalyzes the reversible transfer of the terminal phosphate group between ATP and AMP. Plays an important role in cellular energy homeostasis and in adenine nucleotide metabolism. Adenylate kinase activity is critical for regulation of the phosphate utilization and the AMP de novo biosynthesis pathways
MA-00073-219	PFK2	ko:K00850	0.066005	0.54106	NoChange	Catalyzes the phosphorylation of D-fructose 6-phosphate to fructose 1,6-bisphosphate by ATP, the first committing step of glycolysis	78898.MVEG_05527T0	0	1587	Fungi incertae sedis	GO:0000166,GO:0000426,GO:0001678,GO:0003674,GO:0003676,GO:0003723,GO:0003729,GO:0003824,GO:0003872,GO:0005488,GO:0005524,GO:0005575,GO:0005622,GO:0005623,GO:0005737,GO:0005739,GO:0005829,GO:0005945,GO:0005975,GO:0005996,GO:0006002,GO:0006006,GO:0006007,GO:0006082,GO:0006090,GO:0006091,GO:0006096,GO:0006139,GO:0006163,GO:0006164,GO:0006165,GO:0006725,GO:0006732,GO:0006733,GO:0006734,GO:0006735,GO:…	2.7.1.11	ko00010,ko00030,ko00051,ko00052,ko00680,ko01100,ko01110,ko01120,ko01130,ko01200,ko01230,ko03018,ko04152,ko05230,map00010,map00030,map00051,map00052,map00680,map01100,map01110,map01120,map01130,map01200,map01230,map03018,map04152,map05230	M00001,M00345	R00756,R03236,R03237,R03238,R03239,R04779	RC00002,RC00017	ko00000,ko00001,ko00002,ko01000,ko01009,ko03019			iMM904.YGR240C,iND750.YGR240C	Fungi	1GV7Y@112252,38C5Z@33154,3NUSX@4751,COG0205@1,KOG2440@2759	NA|NA|NA	G	Catalyzes the phosphorylation of D-fructose 6-phosphate to fructose 1,6-bisphosphate by ATP, the first committing step of glycolysis
MA-00268-129	GND1	ko:K00033	0.5982	1.1498	NoChange	Catalyzes the oxidative decarboxylation of 6- phosphogluconate to ribulose 5-phosphate and CO(2), with concomitant reduction of NADP to NADPH	78898.MVEG_02328T0	7e-256	889.4	Fungi incertae sedis	GO:0000166,GO:0003674,GO:0003824,GO:0004616,GO:0005488,GO:0005575,GO:0005622,GO:0005623,GO:0005737,GO:0005739,GO:0005829,GO:0005886,GO:0005975,GO:0006081,GO:0006082,GO:0006090,GO:0006091,GO:0006096,GO:0006098,GO:0006139,GO:0006163,GO:0006164,GO:0006165,GO:0006725,GO:0006732,GO:0006733,GO:0006739,GO:0006753,GO:0006754,GO:0006757,GO:0006793,GO:0006796,GO:0006807,GO:0006950,GO:0006979,GO:0008150,GO:…	1.1.1.343,1.1.1.44	ko00030,ko00480,ko01100,ko01110,ko01120,ko01130,ko01200,map00030,map00480,map01100,map01110,map01120,map01130,map01200	M00004,M00006	R01528,R10221	RC00001,RC00539	ko00000,ko00001,ko00002,ko01000			iMM904.YHR183W,iND750.YHR183W	Fungi	1GT6M@112252,38BP7@33154,3NVGP@4751,COG0362@1,KOG2653@2759	NA|NA|NA	G	Catalyzes the oxidative decarboxylation of 6- phosphogluconate to ribulose 5-phosphate and CO(2), with concomitant reduction of NADP to NADPH
MA-00073-295	ERG6	ko:K00559	0.55776	0.8039	NoChange	Catalyzes the methyl transfer from S-adenosyl-methionine to the C-24 of zymosterol to form fecosterol	78898.MVEG_09967T0	1.7e-157	562.4	Fungi incertae sedis	GO:0003674,GO:0003824,GO:0003838,GO:0005575,GO:0005622,GO:0005623,GO:0005737,GO:0005739,GO:0005740,GO:0005741,GO:0005783,GO:0005811,GO:0005886,GO:0006066,GO:0006629,GO:0006694,GO:0006696,GO:0008150,GO:0008152,GO:0008168,GO:0008169,GO:0008202,GO:0008204,GO:0008610,GO:0008757,GO:0009058,GO:0009987,GO:0012505,GO:0016020,GO:0016125,GO:0016126,GO:0016128,GO:0016129,GO:0016740,GO:0016741,GO:0019867,GO:…	2.1.1.41	ko00100,ko01100,ko01110,ko01130,map00100,map01100,map01110,map01130	M00102	R04427,R07481	RC00003,RC01154	ko00000,ko00001,ko00002,ko01000				Fungi	1GRZ4@112252,38CU5@33154,3NTY3@4751,COG0500@1,KOG1269@2759	NA|NA|NA	I	Catalyzes the methyl transfer from S-adenosyl-methionine to the C-24 of zymosterol to form fecosterol
MA-00072-87	COQ7	ko:K06134	0.30889	0.77724	NoChange	Catalyzes the hydroxylation of 2-polyprenyl-3-methyl-6- methoxy-1,4-benzoquinol (DMQH2) during ubiquinone biosynthesis. Has also a structural role in the COQ enzyme complex, stabilizing other COQ polypeptides	78898.MVEG_10510T0	2.7e-94	351.7	Fungi incertae sedis	GO:0003674,GO:0003824,GO:0004497,GO:0005575,GO:0005622,GO:0005623,GO:0005737,GO:0005739,GO:0005740,GO:0005743,GO:0006732,GO:0006733,GO:0006743,GO:0006744,GO:0008150,GO:0008152,GO:0008682,GO:0009058,GO:0009108,GO:0009987,GO:0016020,GO:0016491,GO:0019866,GO:0031090,GO:0031966,GO:0031967,GO:0031975,GO:0042180,GO:0042181,GO:0043226,GO:0043227,GO:0043229,GO:0043231,GO:0044237,GO:0044249,GO:0044281,GO:…		ko00130,ko01100,ko01110,map00130,map01100,map01110	M00128	R04984,R08775	RC01254	ko00000,ko00001,ko00002,ko01000				Fungi	1GWZ0@112252,38H5U@33154,3NY4E@4751,COG2941@1,KOG4061@2759	NA|NA|NA	Q	Catalyzes the hydroxylation of 2-polyprenyl-3-methyl-6- methoxy-1,4-benzoquinol (DMQH2) during ubiquinone biosynthesis. Has also a structural role in the COQ enzyme complex, stabilizing other COQ polypeptides
MA-00182-360	RIB4	ko:K00794	0.60889	1.1583	NoChange	Catalyzes the formation of 6,7-dimethyl-8- ribityllumazine by condensation of 5-amino-6-(D- ribitylamino)uracil with 3,4-dihydroxy-2-butanone 4-phosphate. This is the penultimate step in the biosynthesis of riboflavin	78898.MVEG_09205T0	3.5e-88	331.3	Fungi incertae sedis	GO:0000906,GO:0003674,GO:0003824,GO:0005488,GO:0005575,GO:0005622,GO:0005623,GO:0005634,GO:0005737,GO:0005739,GO:0005740,GO:0005758,GO:0006766,GO:0006767,GO:0006771,GO:0006807,GO:0008144,GO:0008150,GO:0008152,GO:0009058,GO:0009110,GO:0009231,GO:0009987,GO:0016740,GO:0016765,GO:0017144,GO:0018130,GO:0019842,GO:0031967,GO:0031970,GO:0031974,GO:0031975,GO:0034641,GO:0036094,GO:0042364,GO:0042726,GO:…	2.5.1.78	ko00740,ko01100,ko01110,map00740,map01100,map01110	M00125	R04457	RC00960	ko00000,ko00001,ko00002,ko01000				Fungi	1GTZE@112252,39X3H@33154,3P149@4751,COG0054@1,KOG3243@2759	NA|NA|NA	H	Catalyzes the formation of 6,7-dimethyl-8- ribityllumazine by condensation of 5-amino-6-(D- ribitylamino)uracil with 3,4-dihydroxy-2-butanone 4-phosphate. This is the penultimate step in the biosynthesis of riboflavin
MA-00139-364	ALA1	ko:K01872	0.3589	0.80159	NoChange	Catalyzes the attachment of alanine to tRNA(Ala) in a two-step reaction alanine is first activated by ATP to form Ala- AMP and then transferred to the acceptor end of tRNA(Ala). Also edits incorrectly charged tRNA(Ala) via its editing domain	78898.MVEG_04383T0	0	1774.2	Fungi incertae sedis	GO:0000049,GO:0000959,GO:0002181,GO:0003674,GO:0003676,GO:0003723,GO:0003824,GO:0004812,GO:0004813,GO:0005488,GO:0005575,GO:0005622,GO:0005623,GO:0005737,GO:0005739,GO:0006082,GO:0006139,GO:0006396,GO:0006399,GO:0006400,GO:0006412,GO:0006418,GO:0006419,GO:0006518,GO:0006520,GO:0006725,GO:0006807,GO:0008033,GO:0008150,GO:0008152,GO:0009058,GO:0009059,GO:0009451,GO:0009987,GO:0010467,GO:0016070,GO:…	6.1.1.7	ko00970,map00970	M00359,M00360	R03038	RC00055,RC00523	ko00000,ko00001,ko00002,ko01000,ko01007,ko03016			iMM904.YOR335C,iND750.YOR335C	Fungi	1GS6G@112252,38GHT@33154,3NUR8@4751,COG0013@1,KOG0188@2759	NA|NA|NA	J	Catalyzes the attachment of alanine to tRNA(Ala) in a two-step reaction alanine is first activated by ATP to form Ala- AMP and then transferred to the acceptor end of tRNA(Ala). Also edits incorrectly charged tRNA(Ala) via its editing domain
MA-00090-308	MET7	ko:K01930,ko:K17785	0.62154	1.218	NoChange	Catalyzes conversion of folates to polyglutamate derivatives allowing concentration of folate compounds in the cell and the intracellular retention of these cofactors, which are important substrates for most of the folate-dependent enzymes that are involved in one-carbon transfer reactions involved in purine, pyrimidine and amino acid synthesis	78898.MVEG_03659T0	2.7e-229	801.2	Fungi incertae sedis	GO:0003674,GO:0003824,GO:0004326,GO:0005575,GO:0005622,GO:0005623,GO:0005737,GO:0005739,GO:0005783,GO:0006082,GO:0006520,GO:0006536,GO:0006575,GO:0006725,GO:0006730,GO:0006732,GO:0006760,GO:0006807,GO:0008150,GO:0008152,GO:0009058,GO:0009064,GO:0009108,GO:0009396,GO:0009987,GO:0012505,GO:0016053,GO:0016874,GO:0016879,GO:0016881,GO:0018130,GO:0019438,GO:0019752,GO:0034641,GO:0042398,GO:0042558,GO:…	6.3.2.17	ko00790,ko01100,ko01523,map00790,map01100,map01523		R00942,R02237,R04241	RC00064,RC00090,RC00162	ko00000,ko00001,ko01000,ko03029				Fungi	1GS0Q@112252,38DEV@33154,3NUTU@4751,COG0285@1,KOG2525@2759	NA|NA|NA	H	Catalyzes conversion of folates to polyglutamate derivatives allowing concentration of folate compounds in the cell and the intracellular retention of these cofactors, which are important substrates for most of the folate-dependent enzymes that are involved in one-carbon transfer reactions involved in purine, pyrimidine and amino acid synthesis
MA-00153-136	TIM50	ko:K17496	0.26208	0.54182	NoChange	catalytic domain of ctd-like phosphatases	78898.MVEG_07105T0	3.7e-185	654.4	Fungi incertae sedis	GO:0003674,GO:0003824,GO:0004721,GO:0005048,GO:0005488,GO:0005575,GO:0005622,GO:0005623,GO:0005737,GO:0005739,GO:0005740,GO:0005743,GO:0005744,GO:0005886,GO:0006464,GO:0006470,GO:0006605,GO:0006626,GO:0006793,GO:0006796,GO:0006807,GO:0006810,GO:0006839,GO:0006886,GO:0006996,GO:0007005,GO:0007006,GO:0008104,GO:0008150,GO:0008152,GO:0009987,GO:0015031,GO:0015833,GO:0016020,GO:0016021,GO:0016043,GO:…						ko00000,ko02000,ko03029	3.A.8.1			Fungi	1GSM2@112252,38DKE@33154,3NW4Q@4751,COG5190@1,KOG2832@2759	NA|NA|NA	K	catalytic domain of ctd-like phosphatases
MA-00210-130	NIT3	ko:K13566	0.32509	1.3153	NoChange	Carbon-nitrogen hydrolase	78898.MVEG_05098T0	3e-140	504.6	Fungi incertae sedis	GO:0003674,GO:0003824,GO:0005575,GO:0005622,GO:0005623,GO:0005737,GO:0005739,GO:0006082,GO:0006107,GO:0008150,GO:0008152,GO:0009636,GO:0009987,GO:0016787,GO:0016810,GO:0016811,GO:0019752,GO:0042221,GO:0043226,GO:0043227,GO:0043229,GO:0043231,GO:0043436,GO:0043648,GO:0044237,GO:0044281,GO:0044424,GO:0044444,GO:0044464,GO:0050152,GO:0050896,GO:0051716,GO:0070887,GO:0071704,GO:0097237,GO:0098754,GO:…	3.5.1.3	ko00250,map00250		R00269,R00348	RC00010	ko00000,ko00001,ko01000				Fungi	1GSV9@112252,38TQE@33154,3NTXY@4751,COG0388@1,KOG0806@2759	NA|NA|NA	E	Carbon-nitrogen hydrolase
MA-00073-376	STE24	ko:K06013	0.41462	2.1867	NoChange	CAAX prenyl protease N-terminal, five membrane helices	78898.MVEG_02102T0	1.2e-196	692.6	Fungi incertae sedis	GO:0003674,GO:0003824,GO:0004175,GO:0004222,GO:0005575,GO:0005622,GO:0005623,GO:0005634,GO:0005635,GO:0005637,GO:0005737,GO:0005739,GO:0005740,GO:0005741,GO:0005783,GO:0005789,GO:0006508,GO:0006807,GO:0007323,GO:0008150,GO:0008152,GO:0008233,GO:0008237,GO:0009987,GO:0010467,GO:0012505,GO:0016020,GO:0016021,GO:0016485,GO:0016787,GO:0019538,GO:0019866,GO:0019867,GO:0030176,GO:0031090,GO:0031136,GO:…	3.4.24.84	ko00900,ko01130,map00900,map01130		R09845	RC00141	ko00000,ko00001,ko01000,ko01002,ko04147				Fungi	1GRTW@112252,38C73@33154,3NUIC@4751,COG0501@1,KOG2719@2759	NA|NA|NA	O	CAAX prenyl protease N-terminal, five membrane helices
MA-00101-186	TCB1		0.48196	1.2098	NoChange	C2 domain	78898.MVEG_08793T1	0	1773.4	Fungi incertae sedis	GO:0003674,GO:0005488,GO:0005543,GO:0005575,GO:0005622,GO:0005623,GO:0005737,GO:0005739,GO:0005783,GO:0005794,GO:0005886,GO:0005933,GO:0005938,GO:0006996,GO:0007029,GO:0008150,GO:0008289,GO:0009987,GO:0010256,GO:0012505,GO:0016020,GO:0016043,GO:0019216,GO:0019220,GO:0019222,GO:0022406,GO:0031323,GO:0031410,GO:0031982,GO:0031984,GO:0032541,GO:0035303,GO:0043167,GO:0043168,GO:0043226,GO:0043227,GO:…										Fungi	1GW04@112252,38DXC@33154,3NU87@4751,COG5038@1,KOG1012@2759	NA|NA|NA	M	C2 domain
MA-00213-388	BIO2	ko:K01012	0.059686	0.22338	NoChange	Biotin and Thiamin Synthesis associated domain	78898.MVEG_01007T0	3.7e-208	730.7	Fungi incertae sedis	GO:0003674,GO:0003824,GO:0004076,GO:0005575,GO:0005622,GO:0005623,GO:0005737,GO:0005739,GO:0006082,GO:0006732,GO:0006766,GO:0006767,GO:0006768,GO:0006790,GO:0006807,GO:0008150,GO:0008152,GO:0009058,GO:0009102,GO:0009108,GO:0009110,GO:0009987,GO:0016053,GO:0016740,GO:0016782,GO:0016783,GO:0017144,GO:0018130,GO:0019752,GO:0032787,GO:0034641,GO:0042364,GO:0043226,GO:0043227,GO:0043229,GO:0043231,GO:…	2.8.1.6	ko00780,ko01100,map00780,map01100	M00123,M00573,M00577	R01078	RC00441	ko00000,ko00001,ko00002,ko01000			iMM904.YGR286C,iND750.YGR286C	Fungi	1GT8U@112252,38ESN@33154,3NVE4@4751,COG0502@1,KOG2900@2759	NA|NA|NA	H	Biotin and Thiamin Synthesis associated domain
MA-00268-168	CEM1	ko:K09458	0.90787	0.95591	NoChange	Beta-ketoacyl synthase, C-terminal domain	78898.MVEG_02349T0	1.9e-226	791.6	Fungi incertae sedis	GO:0003674,GO:0003824,GO:0004312,GO:0004315,GO:0005575,GO:0005622,GO:0005623,GO:0005737,GO:0005739,GO:0006082,GO:0006629,GO:0006631,GO:0006633,GO:0008150,GO:0008152,GO:0008610,GO:0009058,GO:0009987,GO:0016053,GO:0016740,GO:0016746,GO:0016747,GO:0019752,GO:0032787,GO:0043226,GO:0043227,GO:0043229,GO:0043231,GO:0043436,GO:0044237,GO:0044238,GO:0044249,GO:0044255,GO:0044281,GO:0044283,GO:0044424,GO:…	2.3.1.179	ko00061,ko00780,ko01100,ko01212,map00061,map00780,map01100,map01212	M00083,M00572	R04355,R04726,R04952,R04957,R04960,R04963,R04968,R07762,R10115,R10119	RC00039,RC02728,RC02729,RC02888	ko00000,ko00001,ko00002,ko01000,ko01004				Fungi	1GRVJ@112252,38H9Y@33154,3NXCS@4751,COG0304@1,KOG1394@2759	NA|NA|NA	IQ	Beta-ketoacyl synthase, C-terminal domain
MA-00090-236	IDP1	ko:K00031	0.043132	0.60077	NoChange	Belongs to the isocitrate and isopropylmalate dehydrogenases family	78898.MVEG_03783T0	1.6e-230	805.1	Fungi	GO:0003674,GO:0003824,GO:0004448,GO:0004450,GO:0005575,GO:0005622,GO:0005623,GO:0005737,GO:0005739,GO:0005759,GO:0005777,GO:0005829,GO:0006082,GO:0006091,GO:0006099,GO:0006101,GO:0006102,GO:0006139,GO:0006520,GO:0006536,GO:0006537,GO:0006629,GO:0006631,GO:0006635,GO:0006725,GO:0006732,GO:0006733,GO:0006739,GO:0006740,GO:0006753,GO:0006793,GO:0006796,GO:0006807,GO:0008150,GO:0008152,GO:0008652,GO:…	1.1.1.42	ko00020,ko00480,ko00720,ko01100,ko01110,ko01120,ko01130,ko01200,ko01210,ko01230,ko04146,map00020,map00480,map00720,map01100,map01110,map01120,map01130,map01200,map01210,map01230,map04146	M00009,M00010,M00173,M00740	R00267,R00268,R01899	RC00001,RC00084,RC00114,RC00626,RC02801	br01601,ko00000,ko00001,ko00002,ko01000			iMM904.YLR174W,iND750.YLR174W	Fungi	38CG3@33154,3NVZ4@4751,COG0538@1,KOG1526@2759	NA|NA|NA	C	Belongs to the isocitrate and isopropylmalate dehydrogenases family
MA-00120-149	EHD3	ko:K05605	0.49448	0.82805	NoChange	Belongs to the enoyl-CoA hydratase isomerase family	78898.MVEG_08601T0	2.8e-215	754.6	Fungi incertae sedis	GO:0003674,GO:0003824,GO:0003860,GO:0005575,GO:0005622,GO:0005623,GO:0005737,GO:0005739,GO:0016289,GO:0016787,GO:0016788,GO:0016790,GO:0043226,GO:0043227,GO:0043229,GO:0043231,GO:0044424,GO:0044444,GO:0044464	3.1.2.4	ko00280,ko00410,ko00640,ko01100,ko01200,map00280,map00410,map00640,map01100,map01200	M00013	R03158,R05064	RC00004,RC00014,RC00137	ko00000,ko00001,ko00002,ko01000				Fungi	1GSGH@112252,38EBG@33154,3NV3G@4751,COG1024@1,KOG1684@2759	NA|NA|NA	I	Belongs to the enoyl-CoA hydratase isomerase family
MA-00153-35	CHO1	ko:K17103	0.215	1.9841	NoChange	Belongs to the CDP-alcohol phosphatidyltransferase class-I family	78898.MVEG_09674T0	1.7e-112	412.1	Fungi incertae sedis	GO:0003674,GO:0003824,GO:0003882,GO:0005575,GO:0005622,GO:0005623,GO:0005737,GO:0005739,GO:0005740,GO:0005741,GO:0005783,GO:0005789,GO:0006139,GO:0006220,GO:0006221,GO:0006575,GO:0006629,GO:0006644,GO:0006646,GO:0006650,GO:0006658,GO:0006659,GO:0006725,GO:0006753,GO:0006793,GO:0006796,GO:0006807,GO:0008150,GO:0008152,GO:0008610,GO:0008654,GO:0009058,GO:0009117,GO:0009165,GO:0009889,GO:0009890,GO:…	2.7.8.8	ko00260,ko00564,ko01100,ko01110,map00260,map00564,map01100,map01110	M00093	R01800	RC00002,RC00017,RC02795	ko00000,ko00001,ko00002,ko01000			iMM904.YER026C,iND750.YER026C	Fungi	1GU3N@112252,2QPJG@2759,38B3T@33154,3NU2S@4751,COG1183@1	NA|NA|NA	I	Belongs to the CDP-alcohol phosphatidyltransferase class-I family
MA-00320-154	BPH1	ko:K22262	0.72531	1.2153	NoChange	beige BEACH domain-containing protein	78898.MVEG_00344T0	0	5399.3	Fungi incertae sedis	GO:0000322,GO:0000323,GO:0000324,GO:0000329,GO:0003674,GO:0005488,GO:0005543,GO:0005575,GO:0005622,GO:0005623,GO:0005737,GO:0005739,GO:0005773,GO:0005774,GO:0005829,GO:0006810,GO:0006886,GO:0006914,GO:0008104,GO:0008150,GO:0008152,GO:0008289,GO:0009056,GO:0009268,GO:0009628,GO:0009987,GO:0015031,GO:0015833,GO:0016020,GO:0016043,GO:0019898,GO:0031090,GO:0031505,GO:0033036,GO:0033043,GO:0034613,GO:…						ko00000,ko04131				Fungi	1GSK6@112252,3AMG3@33154,3NWIJ@4751,KOG1786@1,KOG1786@2759,KOG1788@1,KOG1788@2759	NA|NA|NA	TU	beige BEACH domain-containing protein
MA-00112-221	LSC2	ko:K01900	0.14599	0.73322	NoChange	ATP-grasp domain	78898.MVEG_06597T0	5.5e-223	780	Fungi incertae sedis	GO:0003674,GO:0003824,GO:0004774,GO:0004775,GO:0005575,GO:0005622,GO:0005623,GO:0005737,GO:0005739,GO:0006082,GO:0006091,GO:0006099,GO:0006101,GO:0006104,GO:0006139,GO:0006163,GO:0006637,GO:0006725,GO:0006732,GO:0006753,GO:0006790,GO:0006793,GO:0006796,GO:0006807,GO:0008150,GO:0008152,GO:0009060,GO:0009117,GO:0009150,GO:0009259,GO:0009987,GO:0015980,GO:0016874,GO:0016877,GO:0016878,GO:0016999,GO:…	6.2.1.4,6.2.1.5	ko00020,ko00640,ko01100,ko01110,ko01120,ko01130,ko01200,map00020,map00640,map01100,map01110,map01120,map01130,map01200	M00009,M00011	R00432,R00727	RC00004,RC00014	ko00000,ko00001,ko00002,ko01000,ko04147			iMM904.YGR244C,iND750.YGR244C	Fungi	1GRTJ@112252,38D0K@33154,3NUY0@4751,COG0045@1,KOG2799@2759	NA|NA|NA	C	ATP-grasp domain
MA-00297-418	PIM1	ko:K08675	0.81717	1.0631	NoChange	ATP-dependent serine protease that mediates the selective degradation of misfolded, unassembled or oxidatively damaged polypeptides as well as certain short-lived regulatory proteins in the mitochondrial matrix. May also have a chaperone function in the assembly of inner membrane protein complexes. Participates in the regulation of mitochondrial gene expression and in the maintenance of the integ…	78898.MVEG_07956T0	0	1717.6	Fungi incertae sedis	GO:0000166,GO:0003674,GO:0003824,GO:0004175,GO:0004176,GO:0004252,GO:0005488,GO:0005524,GO:0005575,GO:0005622,GO:0005623,GO:0005737,GO:0005739,GO:0005759,GO:0006508,GO:0006515,GO:0006807,GO:0006996,GO:0007005,GO:0008144,GO:0008150,GO:0008152,GO:0008233,GO:0008236,GO:0009056,GO:0009057,GO:0009987,GO:0016043,GO:0016462,GO:0016787,GO:0016817,GO:0016818,GO:0016887,GO:0017076,GO:0017111,GO:0017171,GO:…	3.4.21.53					ko00000,ko01000,ko01002,ko03029				Fungi	1GRZX@112252,38CF0@33154,3NXAU@4751,COG0466@1,KOG2004@2759	NA|NA|NA	O	ATP-dependent serine protease that mediates the selective degradation of misfolded, unassembled or oxidatively damaged polypeptides as well as certain short-lived regulatory proteins in the mitochondrial matrix. May also have a chaperone function in the assembly of inner membrane protein complexes. Participates in the regulation of mitochondrial gene expression and in the maintenance of the integ…
MA-00090-104	NCA2	ko:K18158	0.4222	0.46677	NoChange	ATP synthase regulation protein NCA2	78898.MVEG_09849T0	7.8e-265	919.8	Fungi incertae sedis	GO:0005575,GO:0005622,GO:0005623,GO:0005737,GO:0005739,GO:0005740,GO:0005741,GO:0006091,GO:0006139,GO:0006725,GO:0006807,GO:0008150,GO:0008152,GO:0009060,GO:0009987,GO:0015980,GO:0016020,GO:0016070,GO:0016071,GO:0019867,GO:0031090,GO:0031966,GO:0031967,GO:0031968,GO:0031975,GO:0034641,GO:0043170,GO:0043226,GO:0043227,GO:0043229,GO:0043231,GO:0044237,GO:0044238,GO:0044422,GO:0044424,GO:0044429,GO:…						ko00000,ko03029				Fungi	1GTMU@112252,28M9W@1,2QTT6@2759,39W55@33154,3NV6S@4751	NA|NA|NA	S	ATP synthase regulation protein NCA2
MA-00023-29	TIM11	ko:K01549	0.51492	0.81943	NoChange	ATP synthase E chain	65672.G4T765	1.7e-12	78.6	Agaricomycetes incertae sedis	GO:0000276,GO:0003674,GO:0005198,GO:0005575,GO:0005622,GO:0005623,GO:0005737,GO:0005739,GO:0005740,GO:0005743,GO:0005753,GO:0006139,GO:0006163,GO:0006164,GO:0006725,GO:0006753,GO:0006754,GO:0006793,GO:0006796,GO:0006807,GO:0006810,GO:0006811,GO:0006812,GO:0006996,GO:0007005,GO:0007006,GO:0007007,GO:0008150,GO:0008152,GO:0009058,GO:0009117,GO:0009123,GO:0009124,GO:0009126,GO:0009127,GO:0009141,GO:…		ko00190,map00190	M00158			ko00000,ko00001,ko00002	3.A.2.1			Fungi	22ACK@155619,2E74K@1,2SDS3@2759,3A8V4@33154,3H5TU@355688,3P6R0@4751,3V2HU@5204	NA|NA|NA	S	ATP synthase E chain
MA-00120-34	TSF1	ko:K02357	0.17733	0.58244	NoChange	Associates with the EF-Tu.GDP complex and induces the exchange of GDP to GTP. It remains bound to the aminoacyl-tRNA.EF- Tu.GTP complex up to the GTP hydrolysis stage on the ribosome	78898.MVEG_08529T0	6.5e-154	550.4	Fungi incertae sedis	GO:0003674,GO:0003676,GO:0003723,GO:0003746,GO:0005488,GO:0005575,GO:0005622,GO:0005623,GO:0005737,GO:0005739,GO:0005759,GO:0006412,GO:0006414,GO:0006518,GO:0006807,GO:0008135,GO:0008150,GO:0008152,GO:0009058,GO:0009059,GO:0009987,GO:0010467,GO:0019538,GO:0031974,GO:0032543,GO:0034641,GO:0034645,GO:0043043,GO:0043170,GO:0043226,GO:0043227,GO:0043229,GO:0043231,GO:0043233,GO:0043603,GO:0043604,GO:…						ko00000,ko03012,ko03029				Fungi	1GTZ9@112252,38FEV@33154,3P2RA@4751,COG0264@1,KOG1071@2759	NA|NA|NA	J	Associates with the EF-Tu.GDP complex and induces the exchange of GDP to GTP. It remains bound to the aminoacyl-tRNA.EF- Tu.GTP complex up to the GTP hydrolysis stage on the ribosome
MA-00326-106	ARG3	ko:K00611	0.76265	0.83227	NoChange	Aspartate/ornithine carbamoyltransferase, Asp/Orn binding domain	78898.MVEG_05901T0	8e-168	596.7	Fungi incertae sedis	GO:0000050,GO:0003674,GO:0003824,GO:0004585,GO:0005575,GO:0005622,GO:0005623,GO:0005737,GO:0005739,GO:0005759,GO:0005829,GO:0006082,GO:0006520,GO:0006525,GO:0006526,GO:0006591,GO:0006807,GO:0008150,GO:0008152,GO:0008652,GO:0009058,GO:0009064,GO:0009084,GO:0009987,GO:0016053,GO:0016740,GO:0016741,GO:0016743,GO:0019627,GO:0019752,GO:0031974,GO:0034641,GO:0042450,GO:0043226,GO:0043227,GO:0043229,GO:…	2.1.3.3	ko00220,ko01100,ko01110,ko01130,ko01230,map00220,map01100,map01110,map01130,map01230	M00029,M00844	R01398	RC00096	ko00000,ko00001,ko00002,ko01000				Fungi	1GT5U@112252,38CHJ@33154,3NVQB@4751,COG0448@1,KOG1504@2759	NA|NA|NA	E	Aspartate/ornithine carbamoyltransferase, Asp/Orn binding domain
MA-00112-86	ARC18	ko:K05756	0.76675	1.0348	NoChange	ARP2/3 complex ARPC3 (21 kDa) subunit	78898.MVEG_06202T0	1.7e-82	312	Fungi incertae sedis	GO:0000001,GO:0000147,GO:0005575,GO:0005622,GO:0005623,GO:0005737,GO:0005739,GO:0005856,GO:0005885,GO:0005938,GO:0006810,GO:0006897,GO:0006996,GO:0007005,GO:0007010,GO:0007015,GO:0007163,GO:0008064,GO:0008150,GO:0008360,GO:0009987,GO:0010638,GO:0015629,GO:0016043,GO:0016192,GO:0022603,GO:0022604,GO:0022607,GO:0030029,GO:0030036,GO:0030479,GO:0030832,GO:0030833,GO:0030838,GO:0030863,GO:0030864,GO:…		ko04144,ko04666,ko04810,ko05100,ko05130,ko05131,ko05132,map04144,map04666,map04810,map05100,map05130,map05131,map05132				ko00000,ko00001,ko04131,ko04812				Fungi	1GWU1@112252,39E3P@33154,3P3AM@4751,KOG3155@1,KOG3155@2759	NA|NA|NA	Z	ARP2/3 complex ARPC3 (21 kDa) subunit
MA-00190-38	SYR1	ko:K01887	0.35337	0.6597	NoChange	Arginyl tRNA synthetase N terminal dom	78898.MVEG_07674T0	0	1268.4	Fungi incertae sedis	GO:0000959,GO:0002181,GO:0003674,GO:0003824,GO:0004812,GO:0004814,GO:0005575,GO:0005622,GO:0005623,GO:0005737,GO:0005739,GO:0006082,GO:0006139,GO:0006399,GO:0006412,GO:0006418,GO:0006420,GO:0006518,GO:0006520,GO:0006725,GO:0006807,GO:0008150,GO:0008152,GO:0009058,GO:0009059,GO:0009987,GO:0010467,GO:0016070,GO:0016874,GO:0016875,GO:0019538,GO:0019752,GO:0032543,GO:0034641,GO:0034645,GO:0034660,GO:…	6.1.1.19	ko00970,map00970	M00359,M00360	R03646	RC00055,RC00523	ko00000,ko00001,ko00002,ko01000,ko01007,ko03016,ko03029				Fungi	1GS9K@112252,38DX4@33154,3NVK0@4751,COG0018@1,KOG1195@2759	NA|NA|NA	J	Arginyl tRNA synthetase N terminal dom
MA-00055-233	ISM1	ko:K01870	0.1209	0.28184	NoChange	Anticodon-binding domain of tRNA	78898.MVEG_10588T0	0	1535	Fungi incertae sedis	GO:0000166,GO:0000959,GO:0003674,GO:0003824,GO:0004812,GO:0004822,GO:0005488,GO:0005524,GO:0005575,GO:0005622,GO:0005623,GO:0005737,GO:0005739,GO:0006082,GO:0006139,GO:0006399,GO:0006412,GO:0006418,GO:0006428,GO:0006518,GO:0006520,GO:0006725,GO:0006807,GO:0008144,GO:0008150,GO:0008152,GO:0009058,GO:0009059,GO:0009987,GO:0010467,GO:0016070,GO:0016874,GO:0016875,GO:0017076,GO:0019538,GO:0019752,GO:…	6.1.1.5	ko00970,map00970	M00359,M00360	R03656	RC00055,RC00523	ko00000,ko00001,ko00002,ko01000,ko01007,ko03016				Fungi	1GSS2@112252,38E68@33154,3NWDK@4751,COG0060@1,KOG0433@2759	NA|NA|NA	J	Anticodon-binding domain of tRNA
MA-00073-660	GRS1	ko:K01880	0.082614	0.63049	NoChange	Anticodon binding domain	78898.MVEG_06831T0	0	1218.8	Fungi incertae sedis	GO:0000166,GO:0000959,GO:0002181,GO:0003674,GO:0003824,GO:0004812,GO:0004820,GO:0005488,GO:0005515,GO:0005524,GO:0005575,GO:0005622,GO:0005623,GO:0005737,GO:0005739,GO:0006082,GO:0006139,GO:0006351,GO:0006353,GO:0006399,GO:0006412,GO:0006418,GO:0006426,GO:0006518,GO:0006520,GO:0006725,GO:0006753,GO:0006793,GO:0006796,GO:0006807,GO:0008144,GO:0008150,GO:0008152,GO:0009058,GO:0009059,GO:0009117,GO:…	6.1.1.14	ko00970,map00970	M00359,M00360	R03654	RC00055,RC00523	ko00000,ko00001,ko00002,ko01000,ko01007,ko03016,ko03029			iMM904.YPR081C,iND750.YPR081C	Fungi	1GS94@112252,38CGD@33154,3NTZ4@4751,COG0423@1,KOG2298@2759	NA|NA|NA	J	Anticodon binding domain
MA-00334-315	FAA2	ko:K01897	0.75039	0.87391	NoChange	AMP-binding enzyme	78898.MVEG_00917T0	0	1093.2	Fungi incertae sedis	GO:0001676,GO:0003674,GO:0003824,GO:0004467,GO:0005575,GO:0005622,GO:0005623,GO:0005737,GO:0005739,GO:0005777,GO:0006082,GO:0006629,GO:0006631,GO:0008150,GO:0008152,GO:0009987,GO:0015645,GO:0016405,GO:0016874,GO:0016877,GO:0016878,GO:0019752,GO:0031956,GO:0031957,GO:0032787,GO:0042579,GO:0043226,GO:0043227,GO:0043229,GO:0043231,GO:0043436,GO:0044237,GO:0044238,GO:0044255,GO:0044281,GO:0044424,GO:…	6.2.1.3	ko00061,ko00071,ko01100,ko01212,ko02024,ko03320,ko04146,ko04216,ko04714,ko04920,map00061,map00071,map01100,map01212,map02024,map03320,map04146,map04216,map04714,map04920	M00086	R01280	RC00004,RC00014	ko00000,ko00001,ko00002,ko01000,ko01004,ko04147	4.C.1.1			Fungi	1GT95@112252,38BK9@33154,3NUAR@4751,COG1022@1,KOG1256@2759	NA|NA|NA	I	AMP-binding enzyme
MA-00213-310	FAA2	ko:K01897	0.18265	0.6018	NoChange	AMP-binding enzyme	78898.MVEG_10069T0	1.3e-303	1048.5	Fungi incertae sedis	GO:0001676,GO:0003674,GO:0003824,GO:0004467,GO:0005575,GO:0005622,GO:0005623,GO:0005737,GO:0005739,GO:0005777,GO:0006082,GO:0006629,GO:0006631,GO:0008150,GO:0008152,GO:0009987,GO:0015645,GO:0016405,GO:0016874,GO:0016877,GO:0016878,GO:0019752,GO:0031956,GO:0031957,GO:0032787,GO:0042579,GO:0043226,GO:0043227,GO:0043229,GO:0043231,GO:0043436,GO:0044237,GO:0044238,GO:0044255,GO:0044281,GO:0044424,GO:…	6.2.1.3	ko00061,ko00071,ko01100,ko01212,ko02024,ko03320,ko04146,ko04216,ko04714,ko04920,map00061,map00071,map01100,map01212,map02024,map03320,map04146,map04216,map04714,map04920	M00086	R01280	RC00004,RC00014	ko00000,ko00001,ko00002,ko01000,ko01004,ko04147	4.C.1.1			Fungi	1GT95@112252,38BK9@33154,3NUAR@4751,COG1022@1,KOG1256@2759	NA|NA|NA	I	AMP-binding enzyme
MA-00153-465	FAA4	ko:K01897	0.01837	0.59237	NoChange	AMP-binding enzyme	78898.MVEG_01962T0	0	1306.2	Fungi incertae sedis	GO:0001676,GO:0003674,GO:0003824,GO:0004467,GO:0005575,GO:0005622,GO:0005623,GO:0005737,GO:0005739,GO:0005740,GO:0005741,GO:0005783,GO:0005811,GO:0005886,GO:0006082,GO:0006139,GO:0006163,GO:0006629,GO:0006631,GO:0006637,GO:0006725,GO:0006732,GO:0006753,GO:0006790,GO:0006793,GO:0006796,GO:0006807,GO:0006810,GO:0006811,GO:0006812,GO:0006820,GO:0006869,GO:0008150,GO:0008152,GO:0009117,GO:0009150,GO:…	6.2.1.3	ko00061,ko00071,ko01100,ko01212,ko02024,ko03320,ko04146,ko04216,ko04714,ko04920,map00061,map00071,map01100,map01212,map02024,map03320,map04146,map04216,map04714,map04920	M00086	R01280	RC00004,RC00014	ko00000,ko00001,ko00002,ko01000,ko01004,ko04147	4.C.1.1		iMM904.YIL009W,iND750.YIL009W	Fungi	1GSD7@112252,39R6J@33154,3NVN8@4751,COG1022@1,KOG1180@2759	NA|NA|NA	I	AMP-binding enzyme
MA-00303-40	NFS1	ko:K04487	0.22879	0.62333	NoChange	Aminotransferase class-V	78898.MVEG_05236T0	5.4e-243	846.7	Fungi incertae sedis	GO:0000959,GO:0000963,GO:0002097,GO:0002098,GO:0002143,GO:0003674,GO:0003824,GO:0004123,GO:0005575,GO:0005622,GO:0005623,GO:0005634,GO:0005737,GO:0005739,GO:0005759,GO:0005829,GO:0006139,GO:0006396,GO:0006399,GO:0006400,GO:0006725,GO:0006790,GO:0006807,GO:0006873,GO:0006875,GO:0006879,GO:0008033,GO:0008150,GO:0008152,GO:0009451,GO:0009987,GO:0010467,GO:0016043,GO:0016070,GO:0016226,GO:0016740,GO:…	2.8.1.7	ko00730,ko01100,ko04122,map00730,map01100,map04122		R07460,R11528,R11529	RC01789,RC02313	ko00000,ko00001,ko01000,ko02048,ko03016,ko03029				Fungi	1GS06@112252,38E7D@33154,3NUA7@4751,COG1104@1,KOG1549@2759	NA|NA|NA	E	Aminotransferase class-V
MA-00139-237		ko:K00830	0.036041	0.54869	NoChange	Aminotransferase class-V	78898.MVEG_04472T0	4.4e-211	740.3	Fungi incertae sedis	GO:0001505,GO:0003674,GO:0003824,GO:0004760,GO:0005575,GO:0005622,GO:0005623,GO:0005737,GO:0005739,GO:0005777,GO:0005829,GO:0006082,GO:0006520,GO:0006544,GO:0006545,GO:0006807,GO:0008150,GO:0008152,GO:0008453,GO:0008483,GO:0008652,GO:0009058,GO:0009069,GO:0009070,GO:0009987,GO:0016053,GO:0016740,GO:0016769,GO:0017144,GO:0019265,GO:0019752,GO:0042133,GO:0042136,GO:0042579,GO:0043226,GO:0043227,GO:…	2.6.1.44,2.6.1.45,2.6.1.51	ko00250,ko00260,ko00630,ko00680,ko01100,ko01110,ko01120,ko01130,ko01200,ko04146,map00250,map00260,map00630,map00680,map01100,map01110,map01120,map01130,map01200,map04146	M00346,M00532	R00369,R00372,R00585,R00588	RC00006,RC00008,RC00018	ko00000,ko00001,ko00002,ko01000,ko01007				Fungi	1GSG5@112252,38BJD@33154,3NW05@4751,COG0075@1,KOG2862@2759	NA|NA|NA	E	Aminotransferase class-V
MA-00334-90	UGA1	ko:K13524	0.85641	0.96374	NoChange	Aminotransferase class-III	78898.MVEG_11968T0	2.2e-242	844.7	Fungi incertae sedis	GO:0001505,GO:0003674,GO:0003824,GO:0003867,GO:0005488,GO:0005575,GO:0005622,GO:0005623,GO:0005737,GO:0005739,GO:0005829,GO:0006082,GO:0006520,GO:0006536,GO:0006807,GO:0008144,GO:0008150,GO:0008152,GO:0008483,GO:0009056,GO:0009063,GO:0009064,GO:0009448,GO:0009450,GO:0009987,GO:0016054,GO:0016740,GO:0016769,GO:0019740,GO:0019752,GO:0019842,GO:0030170,GO:0032787,GO:0034641,GO:0036094,GO:0042133,GO:…	2.6.1.19,2.6.1.22	ko00250,ko00280,ko00410,ko00640,ko00650,ko01100,ko01120,ko04727,map00250,map00280,map00410,map00640,map00650,map01100,map01120,map04727	M00027	R00908,R01648,R04188	RC00006,RC00062,RC00160	ko00000,ko00001,ko00002,ko01000,ko01007				Fungi	1GSD8@112252,38EZI@33154,3NWIR@4751,COG0160@1,KOG1405@2759	NA|NA|NA	E	Aminotransferase class-III
MA-00173-159	BAT2	ko:K00826	0.0075941	0.50435	NoChange	Amino-transferase class IV	78898.MVEG_11340T0	3.2e-212	744.2	Fungi incertae sedis	GO:0003674,GO:0003824,GO:0004084,GO:0005488,GO:0005575,GO:0005622,GO:0005623,GO:0005634,GO:0005737,GO:0005739,GO:0005759,GO:0006082,GO:0006520,GO:0006549,GO:0006551,GO:0006573,GO:0006807,GO:0008144,GO:0008150,GO:0008152,GO:0008483,GO:0008652,GO:0009056,GO:0009058,GO:0009063,GO:0009081,GO:0009082,GO:0009083,GO:0009097,GO:0009098,GO:0009099,GO:0009987,GO:0016053,GO:0016054,GO:0016740,GO:0016769,GO:…	2.6.1.42	ko00270,ko00280,ko00290,ko00770,ko01100,ko01110,ko01130,ko01210,ko01230,map00270,map00280,map00290,map00770,map01100,map01110,map01130,map01210,map01230	M00019,M00036,M00119,M00570	R01090,R01214,R02199,R10991	RC00006,RC00036	ko00000,ko00001,ko00002,ko01000,ko01007				Fungi	1GRXH@112252,38GTA@33154,3NVAG@4751,COG0115@1,KOG0975@2759	NA|NA|NA	E	Amino-transferase class IV
MA-00334-14	AAT1	ko:K14454,ko:K14455	0.09538	0.75502	NoChange	Aminotransferase class I and II	78898.MVEG_11904T0	4.3e-239	833.6	Fungi incertae sedis	GO:0000096,GO:0001300,GO:0001302,GO:0003674,GO:0003824,GO:0004069,GO:0005575,GO:0005622,GO:0005623,GO:0005737,GO:0005739,GO:0005759,GO:0006082,GO:0006103,GO:0006107,GO:0006520,GO:0006528,GO:0006529,GO:0006530,GO:0006531,GO:0006532,GO:0006533,GO:0006534,GO:0006536,GO:0006538,GO:0006790,GO:0006807,GO:0007568,GO:0007569,GO:0008150,GO:0008152,GO:0008483,GO:0008652,GO:0009056,GO:0009058,GO:0009063,GO:…	2.6.1.1	ko00220,ko00250,ko00270,ko00330,ko00350,ko00360,ko00400,ko00710,ko00950,ko00960,ko01100,ko01110,ko01120,ko01130,ko01200,ko01210,ko01230,ko04975,map00220,map00250,map00270,map00330,map00350,map00360,map00400,map00710,map00950,map00960,map01100,map01110,map01120,map01130,map01200,map01210,map01230,map04975	M00170,M00171	R00355,R00694,R00734,R00896,R02433,R02619,R05052	RC00006	ko00000,ko00001,ko00002,ko01000,ko01007,ko04131,ko04147				Fungi	1GT52@112252,38ED5@33154,3NU8Q@4751,COG1448@1,KOG1411@2759	NA|NA|NA	E	Aminotransferase class I and II
MA-00213-489	AOX2		0.42883	1.3886	NoChange	Alternative oxidase	78898.MVEG_10103T0	6.3e-149	533.9	Fungi incertae sedis	GO:0005575,GO:0005622,GO:0005623,GO:0005737,GO:0005739,GO:0005740,GO:0005743,GO:0016020,GO:0019866,GO:0031090,GO:0031966,GO:0031967,GO:0031975,GO:0043226,GO:0043227,GO:0043229,GO:0043231,GO:0044422,GO:0044424,GO:0044429,GO:0044444,GO:0044446,GO:0044464										Fungi	1GRRS@112252,28JWX@1,2QSB5@2759,38J5S@33154,3NU2X@4751	NA|NA|NA	C	Alternative oxidase
MA-00334-69	PPE1	ko:K13617	0.098165	1.4727	NoChange	Alpha/beta hydrolase family	78898.MVEG_05004T0	6.2e-70	271.2	Fungi incertae sedis	GO:0000313,GO:0000314,GO:0003674,GO:0003735,GO:0003824,GO:0005198,GO:0005575,GO:0005622,GO:0005623,GO:0005737,GO:0005739,GO:0005759,GO:0005761,GO:0005763,GO:0005840,GO:0006412,GO:0006464,GO:0006482,GO:0006518,GO:0006807,GO:0008150,GO:0008152,GO:0008214,GO:0009058,GO:0009059,GO:0009636,GO:0009987,GO:0010467,GO:0010921,GO:0015935,GO:0016787,GO:0016788,GO:0019208,GO:0019220,GO:0019222,GO:0019538,GO:…	3.1.1.89					ko00000,ko01000,ko01002				Fungi	1GV6Z@112252,38CHN@33154,3NYW4@4751,COG0596@1,KOG2564@2759	NA|NA|NA	S	Alpha/beta hydrolase family
MA-00073-384		ko:K01054	0.99807	1.0023	NoChange	Alpha/beta hydrolase family	78898.MVEG_03594T0	1.1e-124	453	Fungi incertae sedis	GO:0003674,GO:0003824,GO:0005575,GO:0005622,GO:0005623,GO:0005737,GO:0005739,GO:0005740,GO:0005741,GO:0005783,GO:0005811,GO:0005886,GO:0006629,GO:0006638,GO:0006639,GO:0006641,GO:0008150,GO:0008152,GO:0009056,GO:0009966,GO:0009987,GO:0010646,GO:0012505,GO:0016020,GO:0016042,GO:0016298,GO:0016787,GO:0016788,GO:0017171,GO:0019433,GO:0019867,GO:0023051,GO:0031090,GO:0031966,GO:0031967,GO:0031968,GO:…	3.1.1.23	ko00561,ko01100,ko04714,ko04723,ko04923,map00561,map01100,map04714,map04723,map04923	M00098	R01351	RC00020,RC00041	ko00000,ko00001,ko00002,ko01000,ko01002				Fungi	1GTIZ@112252,38I1Q@33154,3NYMR@4751,COG2267@1,KOG1455@2759	NA|NA|NA	I	Alpha/beta hydrolase family
MA-00112-38		ko:K01054	0.051589	0.78678	NoChange	Alpha/beta hydrolase family	78898.MVEG_03594T0	1e-139	503.1	Fungi incertae sedis	GO:0003674,GO:0003824,GO:0005575,GO:0005622,GO:0005623,GO:0005737,GO:0005739,GO:0005740,GO:0005741,GO:0005783,GO:0005811,GO:0005886,GO:0006629,GO:0006638,GO:0006639,GO:0006641,GO:0008150,GO:0008152,GO:0009056,GO:0009966,GO:0009987,GO:0010646,GO:0012505,GO:0016020,GO:0016042,GO:0016298,GO:0016787,GO:0016788,GO:0017171,GO:0019433,GO:0019867,GO:0023051,GO:0031090,GO:0031966,GO:0031967,GO:0031968,GO:…	3.1.1.23	ko00561,ko01100,ko04714,ko04723,ko04923,map00561,map01100,map04714,map04723,map04923	M00098	R01351	RC00020,RC00041	ko00000,ko00001,ko00002,ko01000,ko01002				Fungi	1GTIZ@112252,38I1Q@33154,3NYMR@4751,COG2267@1,KOG1455@2759	NA|NA|NA	I	Alpha/beta hydrolase family
MA-00153-270	PUT2	ko:K00294	0.043283	1.93	NoChange	Aldehyde dehydrogenase family	78898.MVEG_08707T0	2e-302	1044.3	Fungi incertae sedis	GO:0003674,GO:0003824,GO:0003842,GO:0005575,GO:0005622,GO:0005623,GO:0005737,GO:0005739,GO:0005759,GO:0006082,GO:0006520,GO:0006536,GO:0006537,GO:0006560,GO:0006562,GO:0006807,GO:0006950,GO:0007154,GO:0008150,GO:0008152,GO:0008652,GO:0009056,GO:0009058,GO:0009063,GO:0009064,GO:0009065,GO:0009084,GO:0009267,GO:0009605,GO:0009987,GO:0009991,GO:0010133,GO:0016053,GO:0016054,GO:0016491,GO:0016645,GO:…	1.2.1.88	ko00250,ko00330,ko01100,map00250,map00330,map01100		R00245,R00707,R00708,R04444,R04445,R05051	RC00080,RC00216,RC00242,RC00255	ko00000,ko00001,ko01000				Fungi	1GS2M@112252,38D6T@33154,3NWNB@4751,COG1012@1,KOG2455@2759	NA|NA|NA	E	Aldehyde dehydrogenase family
MA-00055-148	TRX1	ko:K03671	0.76265	0.91581	NoChange	AhpC/TSA family	78898.MVEG_06568T0	3e-32	144.4	Fungi incertae sedis	GO:0000011,GO:0000096,GO:0000097,GO:0000103,GO:0000302,GO:0000322,GO:0000323,GO:0000324,GO:0003674,GO:0003824,GO:0004791,GO:0005575,GO:0005622,GO:0005623,GO:0005634,GO:0005737,GO:0005739,GO:0005740,GO:0005758,GO:0005773,GO:0005829,GO:0006082,GO:0006464,GO:0006518,GO:0006520,GO:0006555,GO:0006575,GO:0006749,GO:0006790,GO:0006807,GO:0006810,GO:0006888,GO:0006890,GO:0006950,GO:0006979,GO:0006996,GO:…		ko04621,ko05418,map04621,map05418				ko00000,ko00001,ko03110				Fungi	1GUEC@112252,3A886@33154,3P5A0@4751,COG0526@1,KOG0907@2759	NA|NA|NA	O	AhpC/TSA family
MA-00072-330	ADK2	ko:K00939,ko:K00944	0.083775	0.32723	NoChange	Adenylate kinase	78898.MVEG_00225T0	1.5e-118	432.6	Fungi incertae sedis	GO:0003674,GO:0003824,GO:0005575,GO:0005622,GO:0005623,GO:0005737,GO:0005739,GO:0005740,GO:0005743,GO:0005759,GO:0006139,GO:0006725,GO:0006753,GO:0006793,GO:0006796,GO:0006807,GO:0008150,GO:0008152,GO:0009117,GO:0009987,GO:0016020,GO:0016301,GO:0016310,GO:0016740,GO:0016772,GO:0016776,GO:0019205,GO:0019637,GO:0019866,GO:0031090,GO:0031966,GO:0031967,GO:0031974,GO:0031975,GO:0034641,GO:0043226,GO:…	2.7.4.10,2.7.4.3	ko00230,ko00730,ko01100,ko01110,ko01130,map00230,map00730,map01100,map01110,map01130	M00049	R00127,R00157,R00333,R01547,R11319	RC00002	ko00000,ko00001,ko00002,ko01000,ko04147				Fungi	1GVI3@112252,38DAF@33154,3NVM0@4751,COG0563@1,KOG3078@2759	NA|NA|NA	F	Adenylate kinase
MA-00268-77	ACP1	ko:K03955	0.42883	0.83416	NoChange	acyl carrier protein	78898.MVEG_02606T0	4.4e-46	190.7	Fungi incertae sedis	GO:0000035,GO:0000036,GO:0003674,GO:0005488,GO:0005575,GO:0005622,GO:0005623,GO:0005737,GO:0005739,GO:0005759,GO:0005829,GO:0005975,GO:0006082,GO:0006629,GO:0006631,GO:0006633,GO:0006643,GO:0006644,GO:0006664,GO:0006732,GO:0006790,GO:0006793,GO:0006796,GO:0008150,GO:0008152,GO:0008610,GO:0008654,GO:0009058,GO:0009106,GO:0009107,GO:0009108,GO:0009245,GO:0009247,GO:0009311,GO:0009312,GO:0009987,GO:…		ko00190,ko01100,ko04714,ko04723,ko04932,ko05010,ko05012,ko05016,map00190,map01100,map04714,map04723,map04932,map05010,map05012,map05016	M00146			ko00000,ko00001,ko00002	3.D.1.6			Fungi	1GXG9@112252,3A92K@33154,3P3WN@4751,COG0236@1,KOG1748@2759	NA|NA|NA	CIQ	acyl carrier protein
MA-00154-2	ACP1	ko:K03955	0.071321	0.47794	NoChange	acyl carrier protein	78898.MVEG_02606T0	4.6e-21	106.7	Fungi incertae sedis	GO:0000035,GO:0000036,GO:0003674,GO:0005488,GO:0005575,GO:0005622,GO:0005623,GO:0005737,GO:0005739,GO:0005759,GO:0005829,GO:0005975,GO:0006082,GO:0006629,GO:0006631,GO:0006633,GO:0006643,GO:0006644,GO:0006664,GO:0006732,GO:0006790,GO:0006793,GO:0006796,GO:0008150,GO:0008152,GO:0008610,GO:0008654,GO:0009058,GO:0009106,GO:0009107,GO:0009108,GO:0009245,GO:0009247,GO:0009311,GO:0009312,GO:0009987,GO:…		ko00190,ko01100,ko04714,ko04723,ko04932,ko05010,ko05012,ko05016,map00190,map01100,map04714,map04723,map04932,map05010,map05012,map05016	M00146			ko00000,ko00001,ko00002	3.D.1.6			Fungi	1GXG9@112252,3A92K@33154,3P3WN@4751,COG0236@1,KOG1748@2759	NA|NA|NA	CIQ	acyl carrier protein
MA-00334-131	ACO1	ko:K01681	0.020052	1.5435	NoChange	Aconitase family (aconitate hydratase)	78898.MVEG_11934T0	0	1295.4	Fungi incertae sedis	GO:0000002,GO:0003674,GO:0003676,GO:0003677,GO:0003690,GO:0003697,GO:0003824,GO:0003994,GO:0005488,GO:0005575,GO:0005576,GO:0005622,GO:0005623,GO:0005737,GO:0005739,GO:0005759,GO:0005829,GO:0006082,GO:0006091,GO:0006099,GO:0006101,GO:0006520,GO:0006536,GO:0006807,GO:0006996,GO:0007005,GO:0008150,GO:0008152,GO:0009060,GO:0009064,GO:0009295,GO:0009605,GO:0009607,GO:0009987,GO:0015980,GO:0016043,GO:…	4.2.1.3	ko00020,ko00630,ko00720,ko01100,ko01110,ko01120,ko01130,ko01200,ko01210,ko01230,map00020,map00630,map00720,map01100,map01110,map01120,map01130,map01200,map01210,map01230	M00009,M00010,M00012,M00173,M00740	R01324,R01325,R01900	RC00497,RC00498,RC00618	br01601,ko00000,ko00001,ko00002,ko01000			iMM904.YLR304C,iND750.YLR304C	Fungi	1GRZ0@112252,38CNX@33154,3NV17@4751,COG1048@1,KOG0453@2759	NA|NA|NA	CE	Aconitase family (aconitate hydratase)
MA-00334-130	ACO1	ko:K01681	0.31162	1.4469	NoChange	Aconitase family (aconitate hydratase)	78898.MVEG_11934T0	1.8e-18	98.2	Fungi incertae sedis	GO:0000002,GO:0003674,GO:0003676,GO:0003677,GO:0003690,GO:0003697,GO:0003824,GO:0003994,GO:0005488,GO:0005575,GO:0005576,GO:0005622,GO:0005623,GO:0005737,GO:0005739,GO:0005759,GO:0005829,GO:0006082,GO:0006091,GO:0006099,GO:0006101,GO:0006520,GO:0006536,GO:0006807,GO:0006996,GO:0007005,GO:0008150,GO:0008152,GO:0009060,GO:0009064,GO:0009295,GO:0009605,GO:0009607,GO:0009987,GO:0015980,GO:0016043,GO:…	4.2.1.3	ko00020,ko00630,ko00720,ko01100,ko01110,ko01120,ko01130,ko01200,ko01210,ko01230,map00020,map00630,map00720,map01100,map01110,map01120,map01130,map01200,map01210,map01230	M00009,M00010,M00012,M00173,M00740	R01324,R01325,R01900	RC00497,RC00498,RC00618	br01601,ko00000,ko00001,ko00002,ko01000			iMM904.YLR304C,iND750.YLR304C	Fungi	1GRZ0@112252,38CNX@33154,3NV17@4751,COG1048@1,KOG0453@2759	NA|NA|NA	CE	Aconitase family (aconitate hydratase)
MA-00018-1	ACO1	ko:K01681	0.018914	0.64839	NoChange	Aconitase family (aconitate hydratase)	78898.MVEG_11934T0	0	1468.8	Fungi incertae sedis	GO:0000002,GO:0003674,GO:0003676,GO:0003677,GO:0003690,GO:0003697,GO:0003824,GO:0003994,GO:0005488,GO:0005575,GO:0005576,GO:0005622,GO:0005623,GO:0005737,GO:0005739,GO:0005759,GO:0005829,GO:0006082,GO:0006091,GO:0006099,GO:0006101,GO:0006520,GO:0006536,GO:0006807,GO:0006996,GO:0007005,GO:0008150,GO:0008152,GO:0009060,GO:0009064,GO:0009295,GO:0009605,GO:0009607,GO:0009987,GO:0015980,GO:0016043,GO:…	4.2.1.3	ko00020,ko00630,ko00720,ko01100,ko01110,ko01120,ko01130,ko01200,ko01210,ko01230,map00020,map00630,map00720,map01100,map01110,map01120,map01130,map01200,map01210,map01230	M00009,M00010,M00012,M00173,M00740	R01324,R01325,R01900	RC00497,RC00498,RC00618	br01601,ko00000,ko00001,ko00002,ko01000			iMM904.YLR304C,iND750.YLR304C	Fungi	1GRZ0@112252,38CNX@33154,3NV17@4751,COG1048@1,KOG0453@2759	NA|NA|NA	CE	Aconitase family (aconitate hydratase)
MA-00184-380	ACC1	ko:K11262	0.095788	1.5613	NoChange	Acetyl-CoA carboxylase, central region	78898.MVEG_07212T0	0	4162.8	Fungi incertae sedis	GO:0000166,GO:0001676,GO:0003674,GO:0003824,GO:0003989,GO:0004075,GO:0005488,GO:0005524,GO:0005575,GO:0005622,GO:0005623,GO:0005737,GO:0005739,GO:0005783,GO:0005789,GO:0005829,GO:0006082,GO:0006606,GO:0006629,GO:0006631,GO:0006633,GO:0006810,GO:0006886,GO:0006913,GO:0006996,GO:0006997,GO:0006998,GO:0008104,GO:0008144,GO:0008150,GO:0008152,GO:0008610,GO:0009058,GO:0009987,GO:0010256,GO:0012505,GO:…	2.1.3.15,6.3.4.14,6.4.1.2	ko00061,ko00254,ko00620,ko00640,ko01100,ko01110,ko01212,ko04152,ko04910,ko04922,map00061,map00254,map00620,map00640,map01100,map01110,map01212,map04152,map04910,map04922	M00082	R00742,R04385,R04386	RC00040,RC00253,RC00367	ko00000,ko00001,ko00002,ko01000				Fungi	1GS6I@112252,38BBT@33154,3NUU6@4751,COG0439@1,KOG0368@2759	NA|NA|NA	I	Acetyl-CoA carboxylase, central region
MA-00182-72	ILV5	ko:K00053	0.31257	0.7597	NoChange	Acetohydroxy acid isomeroreductase, catalytic domain	78898.MVEG_08600T0	1.9e-201	708.4	Fungi incertae sedis	GO:0000002,GO:0003674,GO:0003676,GO:0003677,GO:0003690,GO:0003824,GO:0004455,GO:0005488,GO:0005575,GO:0005622,GO:0005623,GO:0005737,GO:0005739,GO:0005759,GO:0006082,GO:0006520,GO:0006549,GO:0006551,GO:0006573,GO:0006807,GO:0006996,GO:0007005,GO:0008150,GO:0008152,GO:0008652,GO:0009058,GO:0009081,GO:0009082,GO:0009097,GO:0009099,GO:0009295,GO:0009987,GO:0016043,GO:0016053,GO:0016491,GO:0016614,GO:…	1.1.1.86	ko00290,ko00770,ko01100,ko01110,ko01130,ko01210,ko01230,map00290,map00770,map01100,map01110,map01130,map01210,map01230	M00019,M00570	R03051,R04439,R04440,R05068,R05069,R05071	RC00726,RC00836,RC00837,RC01726	ko00000,ko00001,ko00002,ko01000			iMM904.YLR355C,iND750.YLR355C	Fungi	1GT3G@112252,2QQBF@2759,38GR1@33154,3NVDN@4751,COG0059@1	NA|NA|NA	G	Acetohydroxy acid isomeroreductase, catalytic domain
MA-00112-88	NdufA8	ko:K03952	0.012696	0.52239	NoChange	Accessory subunit of the mitochondrial membrane respiratory chain NADH dehydrogenase (Complex I), that is believed not to be involved in catalysis. Complex I functions in the transfer of electrons from NADH to the respiratory chain. The immediate electron acceptor for the enzyme is believed to be ubiquinone	78898.MVEG_03616T0	4.7e-68	263.8	Fungi incertae sedis	GO:0005575,GO:0005622,GO:0005623,GO:0005737,GO:0005739,GO:0005740,GO:0005743,GO:0005746,GO:0005747,GO:0016020,GO:0019866,GO:0030964,GO:0031090,GO:0031966,GO:0031967,GO:0031975,GO:0032991,GO:0043226,GO:0043227,GO:0043229,GO:0043231,GO:0044422,GO:0044424,GO:0044425,GO:0044429,GO:0044444,GO:0044446,GO:0044455,GO:0044464,GO:0045271,GO:0070469,GO:0098796,GO:0098798,GO:0098800,GO:0098803,GO:1902494,GO:…		ko00190,ko01100,ko04714,ko04723,ko04932,ko05010,ko05012,ko05016,map00190,map01100,map04714,map04723,map04932,map05010,map05012,map05016	M00146			ko00000,ko00001,ko00002	3.D.1.6			Fungi	1GTV0@112252,39ZUX@33154,3P1YB@4751,KOG3458@1,KOG3458@2759	NA|NA|NA	C	Accessory subunit of the mitochondrial membrane respiratory chain NADH dehydrogenase (Complex I), that is believed not to be involved in catalysis. Complex I functions in the transfer of electrons from NADH to the respiratory chain. The immediate electron acceptor for the enzyme is believed to be ubiquinone
MA-00323-196	SNQ2	ko:K08712	0.20734	2.2708	NoChange	ABC-transporter extracellular N-terminal	78898.MVEG_03648T0	0	2422.9	Fungi incertae sedis	GO:0003674,GO:0003824,GO:0005215,GO:0005342,GO:0005575,GO:0005622,GO:0005623,GO:0005737,GO:0005739,GO:0005829,GO:0005886,GO:0006810,GO:0006855,GO:0006873,GO:0008150,GO:0008559,GO:0009987,GO:0015238,GO:0015399,GO:0015405,GO:0015849,GO:0015893,GO:0016020,GO:0016021,GO:0016462,GO:0016787,GO:0016817,GO:0016818,GO:0016887,GO:0017111,GO:0019725,GO:0022804,GO:0022857,GO:0030003,GO:0031224,GO:0042221,GO:…		ko02010,map02010				ko00000,ko00001,ko02000	3.A.1.205			Fungi	1GVP6@112252,38F6P@33154,3NTZE@4751,COG1131@1,KOG0065@2759	NA|NA|NA	Q	ABC-transporter extracellular N-terminal
MA-00297-139		ko:K08869	0.99807	1.0036	NoChange	ABC1 family	78898.MVEG_04061T0	4.7e-271	940.6	Fungi incertae sedis	GO:0003674,GO:0003824,GO:0004672,GO:0005488,GO:0005575,GO:0005622,GO:0005623,GO:0005737,GO:0005739,GO:0005740,GO:0005743,GO:0005759,GO:0006464,GO:0006468,GO:0006732,GO:0006733,GO:0006743,GO:0006744,GO:0006793,GO:0006796,GO:0006807,GO:0008150,GO:0008152,GO:0008289,GO:0009058,GO:0009108,GO:0009987,GO:0016020,GO:0016301,GO:0016310,GO:0016462,GO:0016740,GO:0016772,GO:0016773,GO:0016787,GO:0016817,GO:…						ko00000,ko01001				Fungi	1GS2W@112252,38G6I@33154,3NWR2@4751,COG0661@1,KOG1234@2759	NA|NA|NA	S	ABC1 family
MA-00120-294	MSP1	ko:K01509	0.71687	0.77609	NoChange	AAA domain (Cdc48 subfamily)	78898.MVEG_08759T0	3.1e-190	671	Fungi incertae sedis	GO:0000166,GO:0003674,GO:0003824,GO:0005488,GO:0005524,GO:0005575,GO:0005622,GO:0005623,GO:0005634,GO:0005737,GO:0005739,GO:0005740,GO:0005741,GO:0005777,GO:0005778,GO:0006605,GO:0006626,GO:0006810,GO:0006839,GO:0006886,GO:0006996,GO:0007005,GO:0008104,GO:0008144,GO:0008150,GO:0009987,GO:0015031,GO:0015833,GO:0016020,GO:0016043,GO:0016462,GO:0016787,GO:0016817,GO:0016818,GO:0016887,GO:0017038,GO:…	3.6.1.3	ko00230,ko04742,map00230,map04742		R00086	RC00002	ko00000,ko00001,ko01000				Fungi	1GS1Y@112252,38C57@33154,3NVTE@4751,COG0464@1,KOG0737@2759	NA|NA|NA	O	AAA domain (Cdc48 subfamily)
MA-00334-239	TSC13	ko:K10258	0.30437	1.4149	NoChange	3-oxo-5-alpha-steroid 4-dehydrogenase	78898.MVEG_00889T0	1.2e-155	555.8	Fungi incertae sedis	GO:0000038,GO:0003674,GO:0003824,GO:0005575,GO:0005622,GO:0005623,GO:0005737,GO:0005739,GO:0005783,GO:0005789,GO:0006082,GO:0006629,GO:0006631,GO:0006633,GO:0008150,GO:0008152,GO:0008610,GO:0009058,GO:0009987,GO:0012505,GO:0016020,GO:0016021,GO:0016053,GO:0016491,GO:0016627,GO:0016628,GO:0016631,GO:0019752,GO:0030497,GO:0031224,GO:0031984,GO:0032787,GO:0042175,GO:0042761,GO:0043226,GO:0043227,GO:…	1.3.1.93	ko00062,ko01040,ko01110,ko01212,map00062,map01040,map01110,map01212	M00415	R07761,R09449,R10828	RC00052,RC00120	ko00000,ko00001,ko00002,ko01000,ko01004				Fungi	1GRVF@112252,38FVN@33154,3NXAI@4751,KOG1639@1,KOG1639@2759	NA|NA|NA	I	3-oxo-5-alpha-steroid 4-dehydrogenase
MA-00213-428	TSC13	ko:K10258	0.12908	1.4111	NoChange	3-oxo-5-alpha-steroid 4-dehydrogenase	78898.MVEG_00889T0	1.1e-153	549.3	Fungi incertae sedis	GO:0000038,GO:0003674,GO:0003824,GO:0005575,GO:0005622,GO:0005623,GO:0005737,GO:0005739,GO:0005783,GO:0005789,GO:0006082,GO:0006629,GO:0006631,GO:0006633,GO:0008150,GO:0008152,GO:0008610,GO:0009058,GO:0009987,GO:0012505,GO:0016020,GO:0016021,GO:0016053,GO:0016491,GO:0016627,GO:0016628,GO:0016631,GO:0019752,GO:0030497,GO:0031224,GO:0031984,GO:0032787,GO:0042175,GO:0042761,GO:0043226,GO:0043227,GO:…	1.3.1.93	ko00062,ko01040,ko01110,ko01212,map00062,map01040,map01110,map01212	M00415	R07761,R09449,R10828	RC00052,RC00120	ko00000,ko00001,ko00002,ko01000,ko01004				Fungi	1GRVF@112252,38FVN@33154,3NXAI@4751,KOG1639@1,KOG1639@2759	NA|NA|NA	I	3-oxo-5-alpha-steroid 4-dehydrogenase
MA-00073-115		ko:K17427	0.97103	0.97244	NoChange	39S mitochondrial ribosomal protein L46	78898.MVEG_09160T0	3.1e-123	448.4	Fungi incertae sedis	GO:0000313,GO:0000315,GO:0003674,GO:0003735,GO:0005198,GO:0005575,GO:0005622,GO:0005623,GO:0005737,GO:0005739,GO:0005759,GO:0005761,GO:0005762,GO:0005840,GO:0006412,GO:0006518,GO:0006807,GO:0008150,GO:0008152,GO:0009058,GO:0009059,GO:0009987,GO:0010467,GO:0015934,GO:0019538,GO:0031974,GO:0032543,GO:0032991,GO:0034641,GO:0034645,GO:0043043,GO:0043170,GO:0043226,GO:0043227,GO:0043228,GO:0043229,GO:…						br01610,ko00000,ko03011				Fungi	1GTRW@112252,38ESK@33154,3P021@4751,KOG4548@1,KOG4548@2759	NA|NA|NA	J	39S mitochondrial ribosomal protein L46
MA-00073-570	KGD1	ko:K00164	0.11277	0.64843	NoChange	2-oxoglutarate dehydrogenase N-terminus	78898.MVEG_02075T0	0	1942.5	Fungi incertae sedis	GO:0003674,GO:0003824,GO:0004591,GO:0005575,GO:0005622,GO:0005623,GO:0005737,GO:0005739,GO:0005759,GO:0005947,GO:0006082,GO:0006091,GO:0006099,GO:0006101,GO:0006103,GO:0008150,GO:0008152,GO:0009060,GO:0009295,GO:0009353,GO:0009987,GO:0015980,GO:0016491,GO:0016624,GO:0016903,GO:0016999,GO:0017144,GO:0019752,GO:0030062,GO:0031974,GO:0032991,GO:0042645,GO:0043226,GO:0043227,GO:0043228,GO:0043229,GO:…	1.2.4.2	ko00020,ko00310,ko00380,ko01100,ko01110,ko01120,ko01130,ko01200,map00020,map00310,map00380,map01100,map01110,map01120,map01130,map01200	M00009,M00011,M00032	R00621,R01933,R01940,R03316,R08549	RC00004,RC00027,RC00627,RC02743,RC02833,RC02883	br01601,ko00000,ko00001,ko00002,ko01000				Fungi	1GSXR@112252,38FJ2@33154,3NV83@4751,COG0567@1,KOG0450@2759	NA|NA|NA	G	2-oxoglutarate dehydrogenase N-terminus
MA-00153-571	POT1 （ACAA1）	ko:K07513	0.022399	2.2478	UP	Thiolase, N-terminal domain （acetyl-CoA acyltransferase 1 ）	78898.MVEG_05426T0	8e-190	669.8	Fungi incertae sedis	GO:0003674,GO:0003676,GO:0003723,GO:0003729,GO:0003824,GO:0003988,GO:0005488,GO:0005575,GO:0005622,GO:0005623,GO:0005737,GO:0005739,GO:0005740,GO:0005758,GO:0005777,GO:0005782,GO:0006082,GO:0006629,GO:0006631,GO:0006635,GO:0008150,GO:0008152,GO:0009056,GO:0009062,GO:0009987,GO:0016042,GO:0016054,GO:0016408,GO:0016740,GO:0016746,GO:0016747,GO:0019395,GO:0019752,GO:0030258,GO:0031907,GO:0031967,GO:…	2.3.1.16	ko00071,ko00280,ko00592,ko01040,ko01100,ko01110,ko01130,ko01212,ko03320,ko04146,map00071,map00280,map00592,map01040,map01100,map01110,map01130,map01212,map03320,map04146	M00087,M00113	R00927,R01177,R03778,R03858,R03991,R04546,R04742,R04747,R07891,R07895,R07899,R07937,R07953	RC00004,RC00326,RC00405,RC01702,RC02728	ko00000,ko00001,ko00002,ko01000				Fungi	1GS1H@112252,38F89@33154,3NUEC@4751,COG0183@1,KOG1389@2759	NA|NA|NA	I	Thiolase, N-terminal domain
MA-00162-147	PDA1	ko:K00161	0.02957	4.2707	UP	The pyruvate dehydrogenase complex catalyzes the overall conversion of pyruvate to acetyl-CoA and CO(2)	78898.MVEG_09006T0	2.8e-170	604.7	Fungi incertae sedis	GO:0003674,GO:0003824,GO:0004738,GO:0004739,GO:0005575,GO:0005622,GO:0005623,GO:0005634,GO:0005730,GO:0005737,GO:0005739,GO:0005759,GO:0005967,GO:0006082,GO:0006084,GO:0006085,GO:0006086,GO:0006090,GO:0006091,GO:0006099,GO:0006101,GO:0006139,GO:0006163,GO:0006164,GO:0006637,GO:0006725,GO:0006732,GO:0006753,GO:0006790,GO:0006793,GO:0006796,GO:0006807,GO:0007124,GO:0008150,GO:0008152,GO:0009058,GO:…	1.2.4.1	ko00010,ko00020,ko00620,ko01100,ko01110,ko01120,ko01130,ko01200,ko04066,ko04922,ko05230,map00010,map00020,map00620,map01100,map01110,map01120,map01130,map01200,map04066,map04922,map05230	M00307	R00014,R00209,R01699,R03270	RC00004,RC00027,RC00627,RC02742,RC02744,RC02882	br01601,ko00000,ko00001,ko00002,ko01000			iMM904.YER178W,iND750.YER178W	Fungi	1GSKU@112252,38G37@33154,3NUI6@4751,COG0462@1,KOG0225@2759	NA|NA|NA	C	The pyruvate dehydrogenase complex catalyzes the overall conversion of pyruvate to acetyl-CoA and CO(2)
MA-00072-332	LAP3	ko:K01372	0.006173	3.3265	UP	Peptidase C1-like family	78898.MVEG_00216T0	8.9e-215	753.1	Fungi incertae sedis	GO:0000096,GO:0000098,GO:0000122,GO:0000976,GO:0000977,GO:0000978,GO:0000987,GO:0001012,GO:0001067,GO:0003674,GO:0003676,GO:0003677,GO:0003690,GO:0003697,GO:0003723,GO:0003729,GO:0003824,GO:0005488,GO:0005575,GO:0005622,GO:0005623,GO:0005737,GO:0005739,GO:0006082,GO:0006355,GO:0006357,GO:0006508,GO:0006520,GO:0006790,GO:0006807,GO:0008150,GO:0008152,GO:0008233,GO:0008234,GO:0009056,GO:0009063,GO:…	3.4.22.40					ko00000,ko01000,ko01002				Fungi	1GSJ7@112252,38E6A@33154,3NVD9@4751,COG3579@1,KOG4128@2759	NA|NA|NA	E	Peptidase C1-like family
MA-00153-662	CAT1	ko:K03781	0.011602	2.9207	UP	Occurs in almost all aerobically respiring organisms and serves to protect cells from the toxic effects of hydrogen peroxide （CATALASE）	78898.MVEG_02478T0	2.1e-245	854.7	Fungi incertae sedis	GO:0000302,GO:0001306,GO:0001315,GO:0003674,GO:0003824,GO:0004096,GO:0004601,GO:0005488,GO:0005575,GO:0005618,GO:0005622,GO:0005623,GO:0005737,GO:0005739,GO:0005759,GO:0005777,GO:0005782,GO:0006950,GO:0006970,GO:0006979,GO:0007154,GO:0007568,GO:0007571,GO:0008150,GO:0008152,GO:0009056,GO:0009267,GO:0009277,GO:0009405,GO:0009605,GO:0009628,GO:0009636,GO:0009651,GO:0009987,GO:0009991,GO:0010035,GO:…	1.11.1.6	ko00380,ko00630,ko01110,ko01130,ko01200,ko04011,ko04016,ko04068,ko04146,ko04211,ko04212,ko04213,ko05014,map00380,map00630,map01110,map01130,map01200,map04011,map04016,map04068,map04146,map04211,map04212,map04213,map05014	M00532	R00009,R00602,R02670	RC00034,RC00767,RC02141,RC02755	ko00000,ko00001,ko00002,ko01000				Fungi	1GS3G@112252,38BMC@33154,3NUEX@4751,COG0753@1,KOG0047@2759	NA|NA|NA	P	Occurs in almost all aerobically respiring organisms and serves to protect cells from the toxic effects of hydrogen peroxide
MA-00067-63	CAT1	ko:K03781	0.011066	5.4	UP	Occurs in almost all aerobically respiring organisms and serves to protect cells from the toxic effects of hydrogen peroxide	78898.MVEG_02478T0	3.1e-249	867.5	Fungi incertae sedis	GO:0000302,GO:0001306,GO:0001315,GO:0003674,GO:0003824,GO:0004096,GO:0004601,GO:0005488,GO:0005575,GO:0005618,GO:0005622,GO:0005623,GO:0005737,GO:0005739,GO:0005759,GO:0005777,GO:0005782,GO:0006950,GO:0006970,GO:0006979,GO:0007154,GO:0007568,GO:0007571,GO:0008150,GO:0008152,GO:0009056,GO:0009267,GO:0009277,GO:0009405,GO:0009605,GO:0009628,GO:0009636,GO:0009651,GO:0009987,GO:0009991,GO:0010035,GO:…	1.11.1.6	ko00380,ko00630,ko01110,ko01130,ko01200,ko04011,ko04016,ko04068,ko04146,ko04211,ko04212,ko04213,ko05014,map00380,map00630,map01110,map01130,map01200,map04011,map04016,map04068,map04146,map04211,map04212,map04213,map05014	M00532	R00009,R00602,R02670	RC00034,RC00767,RC02141,RC02755	ko00000,ko00001,ko00002,ko01000				Fungi	1GS3G@112252,38BMC@33154,3NUEX@4751,COG0753@1,KOG0047@2759	NA|NA|NA	P	Occurs in almost all aerobically respiring organisms and serves to protect cells from the toxic effects of hydrogen peroxide
MA-00073-10	SSA2	ko:K03283	0.012046	64.673	UP	MreB/Mbl protein	78898.MVEG_09750T0	0	1146	Fungi incertae sedis	GO:0000049,GO:0000060,GO:0000166,GO:0000209,GO:0000322,GO:0000323,GO:0000324,GO:0000329,GO:0002181,GO:0002376,GO:0003674,GO:0003676,GO:0003723,GO:0003824,GO:0005488,GO:0005515,GO:0005524,GO:0005575,GO:0005576,GO:0005618,GO:0005622,GO:0005623,GO:0005634,GO:0005681,GO:0005737,GO:0005739,GO:0005773,GO:0005774,GO:0005829,GO:0005844,GO:0005886,GO:0006403,GO:0006404,GO:0006412,GO:0006457,GO:0006464,GO:…		ko03040,ko04010,ko04141,ko04144,ko04213,ko04612,ko04915,ko05134,ko05145,ko05162,ko05164,ko05169,map03040,map04010,map04141,map04144,map04213,map04612,map04915,map05134,map05145,map05162,map05164,map05169	M00353,M00355			ko00000,ko00001,ko00002,ko01009,ko03009,ko03029,ko03041,ko03051,ko03110,ko04131,ko04147,ko04516	1.A.33.1			Fungi	1GWB2@112252,38BSZ@33154,3NVJE@4751,COG0443@1,KOG0101@2759	NA|NA|NA	O	MreB/Mbl protein
MA-00090-219	PYK1	ko:K00873	0.012399	3.4307	UP	Mortierella verticillata NRRL 6337 pyruvate kinase	78898.MVEG_03787T0	7.8e-256	889.4	Fungi incertae sedis	GO:0003674,GO:0003824,GO:0004743,GO:0005575,GO:0005618,GO:0005622,GO:0005623,GO:0005737,GO:0005739,GO:0005829,GO:0005886,GO:0005975,GO:0005996,GO:0006006,GO:0006007,GO:0006082,GO:0006090,GO:0006091,GO:0006096,GO:0006139,GO:0006163,GO:0006164,GO:0006165,GO:0006725,GO:0006732,GO:0006733,GO:0006734,GO:0006735,GO:0006753,GO:0006754,GO:0006757,GO:0006793,GO:0006796,GO:0006807,GO:0006950,GO:0007154,GO:…	2.7.1.40	ko00010,ko00230,ko00620,ko01100,ko01110,ko01120,ko01130,ko01200,ko01230,ko04922,ko04930,ko05165,ko05203,ko05230,map00010,map00230,map00620,map01100,map01110,map01120,map01130,map01200,map01230,map04922,map04930,map05165,map05203,map05230	M00001,M00002,M00049,M00050	R00200,R00430,R01138,R01858,R02320	RC00002,RC00015	ko00000,ko00001,ko00002,ko01000,ko04131,ko04147				Fungi	1GVDU@112252,38BPM@33154,3NUBE@4751,COG0469@1,KOG2323@2759	NA|NA|NA	G	Mortierella verticillata NRRL 6337 pyruvate kinase
MA-00073-159	PEP4	ko:K01381	0.02858	2.8391	UP	Mortierella verticillata NRRL 6337 （saccharopepsin [EC:3.4.23.25]）	78898.MVEG_02703T0	1.5e-185	655.6	Fungi incertae sedis	GO:0000322,GO:0000323,GO:0000324,GO:0003674,GO:0003824,GO:0004175,GO:0004190,GO:0005575,GO:0005576,GO:0005618,GO:0005622,GO:0005623,GO:0005737,GO:0005739,GO:0005773,GO:0005783,GO:0005886,GO:0006508,GO:0006807,GO:0006914,GO:0006950,GO:0007154,GO:0008104,GO:0008150,GO:0008152,GO:0008233,GO:0009056,GO:0009057,GO:0009267,GO:0009277,GO:0009605,GO:0009897,GO:0009986,GO:0009987,GO:0009991,GO:0012505,GO:…	3.4.23.25	ko04138,map04138				ko00000,ko00001,ko01000,ko01002				Fungi	1GSB4@112252,38D42@33154,3NW5J@4751,KOG1339@1,KOG1339@2759	NA|NA|NA	O	Mortierella verticillata NRRL 6337
MA-00213-431		ko:K20523	0.011602	2.9597	UP	Las17-binding protein actin regulator	78898.MVEG_01124T0	1.4e-151	542.7	Fungi incertae sedis	GO:0001726,GO:0003674,GO:0003779,GO:0005488,GO:0005515,GO:0005543,GO:0005575,GO:0005622,GO:0005623,GO:0005737,GO:0005739,GO:0005829,GO:0005856,GO:0005886,GO:0005933,GO:0005935,GO:0005938,GO:0006810,GO:0006897,GO:0006996,GO:0007010,GO:0007015,GO:0008092,GO:0008150,GO:0008289,GO:0009987,GO:0015629,GO:0016020,GO:0016043,GO:0016192,GO:0022607,GO:0030029,GO:0030036,GO:0030427,GO:0030479,GO:0030863,GO:…						ko00000,ko04131				Fungi	1GVM7@112252,38FCU@33154,3NWAM@4751,COG2930@1,KOG1843@2759	NA|NA|NA	T	Las17-binding protein actin regulator
MA-00120-42	GPX2	ko:K00432	0.022351	4.39	UP	Glutathione peroxidase	78898.MVEG_08562T0	1.4e-65	255.8	Fungi incertae sedis	GO:0000302,GO:0003674,GO:0003824,GO:0004601,GO:0005575,GO:0005622,GO:0005623,GO:0005737,GO:0005739,GO:0005829,GO:0006950,GO:0006979,GO:0008150,GO:0008152,GO:0008379,GO:0009056,GO:0009636,GO:0009987,GO:0010035,GO:0016209,GO:0016491,GO:0016684,GO:0016999,GO:0017001,GO:0017144,GO:0019725,GO:0033554,GO:0034599,GO:0034614,GO:0035690,GO:0042221,GO:0042493,GO:0042542,GO:0042592,GO:0042737,GO:0042743,GO:…	1.11.1.9	ko00480,ko00590,ko04918,map00480,map00590,map04918		R00274,R07034,R07035	RC00011,RC00982	ko00000,ko00001,ko01000				Fungi	1GTQC@112252,3A1XE@33154,3P24F@4751,COG0386@1,KOG1651@2759	NA|NA|NA	O	Glutathione peroxidase
MA-00073-268	GYP1	ko:K20360	0.01837	2.0339	UP	Domain in Tre-2, BUB2p, and Cdc16p. Probable Rab-GAPs.	78898.MVEG_05437T0	1.5e-236	825.5	Fungi incertae sedis	GO:0003674,GO:0005096,GO:0005488,GO:0005515,GO:0005575,GO:0005622,GO:0005623,GO:0005737,GO:0005739,GO:0005794,GO:0006810,GO:0006886,GO:0008047,GO:0008104,GO:0008150,GO:0012505,GO:0015031,GO:0015833,GO:0016192,GO:0017016,GO:0017137,GO:0019899,GO:0030234,GO:0030695,GO:0031267,GO:0031338,GO:0032879,GO:0033036,GO:0033043,GO:0034613,GO:0042886,GO:0043085,GO:0043087,GO:0043226,GO:0043227,GO:0043229,GO:…						ko00000,ko04131				Fungi	1GSTB@112252,38CKU@33154,3NWNR@4751,KOG1092@1,KOG1092@2759	NA|NA|NA	U	Domain in Tre-2, BUB2p, and Cdc16p. Probable Rab-GAPs.
MA-00334-95	SOD2	ko:K04564	0.043132	3.4787	UP	Destroys radicals which are normally produced within the cells and which are toxic to biological systems	78898.MVEG_12031T0	5.2e-119	433.7	Fungi incertae sedis	GO:0000302,GO:0000303,GO:0000305,GO:0001300,GO:0001302,GO:0001306,GO:0001315,GO:0001320,GO:0001323,GO:0001324,GO:0003674,GO:0003824,GO:0004784,GO:0005488,GO:0005575,GO:0005622,GO:0005623,GO:0005737,GO:0005739,GO:0005759,GO:0006801,GO:0006950,GO:0006979,GO:0007568,GO:0007569,GO:0007571,GO:0008150,GO:0008152,GO:0009636,GO:0009987,GO:0010035,GO:0016209,GO:0016491,GO:0016721,GO:0019430,GO:0030145,GO:…	1.15.1.1	ko04013,ko04068,ko04146,ko04211,ko04212,ko04213,ko05016,map04013,map04068,map04146,map04211,map04212,map04213,map05016				ko00000,ko00001,ko01000				Fungi	1GSHW@112252,396RM@33154,3NZG9@4751,COG0605@1,KOG0876@2759	NA|NA|NA	P	Destroys radicals which are normally produced within the cells and which are toxic to biological systems
MA-00334-546	HEM15	ko:K01772	0.014635	2.4413	UP	Catalyzes the ferrous insertion into protoporphyrin IX	78898.MVEG_10611T0	6.6e-192	676.8	Fungi incertae sedis	GO:0003674,GO:0003824,GO:0004325,GO:0005488,GO:0005575,GO:0005622,GO:0005623,GO:0005737,GO:0005739,GO:0005740,GO:0005743,GO:0006725,GO:0006778,GO:0006779,GO:0006783,GO:0006807,GO:0008150,GO:0008152,GO:0009058,GO:0009987,GO:0016020,GO:0016829,GO:0018130,GO:0019438,GO:0019866,GO:0031090,GO:0031966,GO:0031967,GO:0031975,GO:0033013,GO:0033014,GO:0034641,GO:0042168,GO:0042440,GO:0043226,GO:0043227,GO:…	4.99.1.1,4.99.1.9	ko00860,ko01100,ko01110,map00860,map01100,map01110	M00121	R00310,R11329	RC01012	ko00000,ko00001,ko00002,ko01000				Fungi	1GSCR@112252,38BPY@33154,3NUJ0@4751,COG0276@1,KOG1321@2759	NA|NA|NA	H	Catalyzes the ferrous insertion into protoporphyrin IX
MA-00182-194	TCB1		0.029373	2.3087	UP	C2 domain	78898.MVEG_01506T0	0	1752.6	Fungi incertae sedis	GO:0003674,GO:0005488,GO:0005543,GO:0005575,GO:0005622,GO:0005623,GO:0005737,GO:0005739,GO:0005783,GO:0005794,GO:0005886,GO:0005933,GO:0005938,GO:0006996,GO:0007029,GO:0008150,GO:0008289,GO:0009987,GO:0010256,GO:0012505,GO:0016020,GO:0016043,GO:0019216,GO:0019220,GO:0019222,GO:0022406,GO:0031323,GO:0031410,GO:0031982,GO:0031984,GO:0032541,GO:0035303,GO:0043167,GO:0043168,GO:0043226,GO:0043227,GO:…										Fungi	1GW04@112252,38DXC@33154,3NU87@4751,COG5038@1,KOG1012@2759	NA|NA|NA	M	C2 domain
MA-00153-474		ko:K03671	0.0047627	2.7876	UP	Belongs to the thioredoxin family	78898.MVEG_01969T0	6.3e-80	303.9	Fungi	GO:0003674,GO:0003824,GO:0004791,GO:0005575,GO:0005622,GO:0005623,GO:0005737,GO:0005739,GO:0006950,GO:0006979,GO:0008150,GO:0008152,GO:0009636,GO:0009987,GO:0015035,GO:0015036,GO:0016209,GO:0016491,GO:0016651,GO:0016667,GO:0016668,GO:0016671,GO:0019725,GO:0033554,GO:0034599,GO:0042221,GO:0042592,GO:0043226,GO:0043227,GO:0043229,GO:0043231,GO:0044424,GO:0044444,GO:0044464,GO:0045454,GO:0047134,GO:…		ko04621,ko05418,map04621,map05418				ko00000,ko00001,ko03110				Fungi	3A886@33154,3P5A0@4751,COG0526@1,KOG0907@2759	NA|NA|NA	O	Belongs to the thioredoxin family
MA-00072-331	FAA4	ko:K01897	0.037118	4.5563	UP	AMP-binding enzyme	78898.MVEG_01962T0	0	1189.5	Fungi incertae sedis	GO:0001676,GO:0003674,GO:0003824,GO:0004467,GO:0005575,GO:0005622,GO:0005623,GO:0005737,GO:0005739,GO:0005740,GO:0005741,GO:0005783,GO:0005811,GO:0005886,GO:0006082,GO:0006139,GO:0006163,GO:0006629,GO:0006631,GO:0006637,GO:0006725,GO:0006732,GO:0006753,GO:0006790,GO:0006793,GO:0006796,GO:0006807,GO:0006810,GO:0006811,GO:0006812,GO:0006820,GO:0006869,GO:0008150,GO:0008152,GO:0009117,GO:0009150,GO:…	6.2.1.3	ko00061,ko00071,ko01100,ko01212,ko02024,ko03320,ko04146,ko04216,ko04714,ko04920,map00061,map00071,map01100,map01212,map02024,map03320,map04146,map04216,map04714,map04920	M00086	R01280	RC00004,RC00014	ko00000,ko00001,ko00002,ko01000,ko01004,ko04147	4.C.1.1		iMM904.YIL009W,iND750.YIL009W	Fungi	1GSD7@112252,39R6J@33154,3NVN8@4751,COG1022@1,KOG1180@2759	NA|NA|NA	I	AMP-binding enzyme

## Sheet: Sheet2
Query_name	Preferred_name	KEGG KO	P.Value	Fold.Change	Threshold	description	Seed ortholog	e-value	score	best tax lvl	GO terms	EC number	KEGG pathway	KEGG module	KEGG reaction	KEGG rclass	BRITE	KEGG TC	CAZy	BiGG reaction	annot lvl	matching OGs	Best OG	COG cat
MA-00067-346	SPS19（DECR2）	ko:K13237	0.034813	4.9532	UP	KR domain（peroxisomal 2,4-dienoyl-CoA reductase [EC:1.3.1.34]）	78898.MVEG_05405T0	7.6e-147	526.6	Fungi incertae sedis	GO:0000003,GO:0003006,GO:0003674,GO:0003824,GO:0005575,GO:0005622,GO:0005623,GO:0005737,GO:0005777,GO:0005782,GO:0006082,GO:0006629,GO:0006631,GO:0007049,GO:0008150,GO:0008152,GO:0008670,GO:0009056,GO:0009062,GO:0009653,GO:0009987,GO:0016042,GO:0016054,GO:0016491,GO:0016627,GO:0016628,GO:0019752,GO:0019953,GO:0022402,GO:0022413,GO:0022414,GO:0030154,GO:0030435,GO:0030437,GO:0031907,GO:0031974,GO:…	1.3.1.34	ko04146,map04146				ko00000,ko00001,ko01000				Fungi	1GTHZ@112252,3905U@33154,3NVVN@4751,COG1028@1,KOG0725@2759	NA|NA|NA	Q
MA-00067-63	CAT1	ko:K03781	0.015838	5.4	UP	Occurs in almost all aerobically respiring organisms and serves to protect cells from the toxic effects of hydrogen peroxide （catalase [EC:1.11.1.6]）	78898.MVEG_02478T0	3.1e-249	867.5	Fungi incertae sedis	GO:0000302,GO:0001306,GO:0001315,GO:0003674,GO:0003824,GO:0004096,GO:0004601,GO:0005488,GO:0005575,GO:0005618,GO:0005622,GO:0005623,GO:0005737,GO:0005739,GO:0005759,GO:0005777,GO:0005782,GO:0006950,GO:0006970,GO:0006979,GO:0007154,GO:0007568,GO:0007571,GO:0008150,GO:0008152,GO:0009056,GO:0009267,GO:0009277,GO:0009405,GO:0009605,GO:0009628,GO:0009636,GO:0009651,GO:0009987,GO:0009991,GO:0010035,GO:…	1.11.1.6	ko00380,ko00630,ko01110,ko01130,ko01200,ko04011,ko04016,ko04068,ko04146,ko04211,ko04212,ko04213,ko05014,map00380,map00630,map01110,map01130,map01200,map04011,map04016,map04068,map04146,map04211,map04212,map04213,map05014	M00532	R00009,R00602,R02670	RC00034,RC00767,RC02141,RC02755	ko00000,ko00001,ko00002,ko01000				Fungi	1GS3G@112252,38BMC@33154,3NUEX@4751,COG0753@1,KOG0047@2759	NA|NA|NA	P
MA-00153-571	POT1(ACAA1)	ko:K07513	0.033386	2.2478	UP	Thiolase, N-terminal domain	78898.MVEG_05426T0	8e-190	669.8	Fungi incertae sedis	GO:0003674,GO:0003676,GO:0003723,GO:0003729,GO:0003824,GO:0003988,GO:0005488,GO:0005575,GO:0005622,GO:0005623,GO:0005737,GO:0005739,GO:0005740,GO:0005758,GO:0005777,GO:0005782,GO:0006082,GO:0006629,GO:0006631,GO:0006635,GO:0008150,GO:0008152,GO:0009056,GO:0009062,GO:0009987,GO:0016042,GO:0016054,GO:0016408,GO:0016740,GO:0016746,GO:0016747,GO:0019395,GO:0019752,GO:0030258,GO:0031907,GO:0031967,GO:…	2.3.1.16	ko00071,ko00280,ko00592,ko01040,ko01100,ko01110,ko01130,ko01212,ko03320,ko04146,map00071,map00280,map00592,map01040,map01100,map01110,map01130,map01212,map03320,map04146	M00087,M00113	R00927,R01177,R03778,R03858,R03991,R04546,R04742,R04747,R07891,R07895,R07899,R07937,R07953	RC00004,RC00326,RC00405,RC01702,RC02728	ko00000,ko00001,ko00002,ko01000				Fungi	1GS1H@112252,38F89@33154,3NUEC@4751,COG0183@1,KOG1389@2759	NA|NA|NA	I
MA-00153-662	CAT1	ko:K03781	0.015838	2.9207	UP	Occurs in almost all aerobically respiring organisms and serves to protect cells from the toxic effects of hydrogen peroxide （catalase [EC:1.11.1.6]）	78898.MVEG_02478T0	2.1e-245	854.7	Fungi incertae sedis	GO:0000302,GO:0001306,GO:0001315,GO:0003674,GO:0003824,GO:0004096,GO:0004601,GO:0005488,GO:0005575,GO:0005618,GO:0005622,GO:0005623,GO:0005737,GO:0005739,GO:0005759,GO:0005777,GO:0005782,GO:0006950,GO:0006970,GO:0006979,GO:0007154,GO:0007568,GO:0007571,GO:0008150,GO:0008152,GO:0009056,GO:0009267,GO:0009277,GO:0009405,GO:0009605,GO:0009628,GO:0009636,GO:0009651,GO:0009987,GO:0009991,GO:0010035,GO:…	1.11.1.6	ko00380,ko00630,ko01110,ko01130,ko01200,ko04011,ko04016,ko04068,ko04146,ko04211,ko04212,ko04213,ko05014,map00380,map00630,map01110,map01130,map01200,map04011,map04016,map04068,map04146,map04211,map04212,map04213,map05014	M00532	R00009,R00602,R02670	RC00034,RC00767,RC02141,RC02755	ko00000,ko00001,ko00002,ko01000				Fungi	1GS3G@112252,38BMC@33154,3NUEX@4751,COG0753@1,KOG0047@2759	NA|NA|NA	P
MA-00213-243	PEX11	ko:K13352	0.044781	2.3859	UP	Peroxisomal biogenesis factor 11 (PEX11)	78898.MVEG_02878T0	9e-106	389.8	Fungi incertae sedis	GO:0005575,GO:0005622,GO:0005623,GO:0005737,GO:0005777,GO:0005778,GO:0005783,GO:0006082,GO:0006629,GO:0006631,GO:0006996,GO:0007031,GO:0008150,GO:0008152,GO:0009987,GO:0012505,GO:0016020,GO:0016043,GO:0016559,GO:0019395,GO:0019752,GO:0030258,GO:0031090,GO:0031903,GO:0032535,GO:0032787,GO:0032991,GO:0034440,GO:0042579,GO:0043226,GO:0043227,GO:0043229,GO:0043231,GO:0043436,GO:0044237,GO:0044238,GO:…		ko04146,map04146				ko00000,ko00001,ko02000	1.A.101.1,3.A.20.1.1			Fungi	1GTTB@112252,38B7Q@33154,3NWIA@4751,KOG4186@1,KOG4186@2759	NA|NA|NA	U
MA-00297-131	aceB	ko:K01638	0.015838	2.6758	UP	Malate synthase	78898.MVEG_06050T0	3.5e-294	1016.9	Fungi incertae sedis	GO:0003674,GO:0003824,GO:0004474,GO:0005575,GO:0005622,GO:0005623,GO:0005737,GO:0005777,GO:0005782,GO:0005975,GO:0006081,GO:0006082,GO:0006083,GO:0006097,GO:0006629,GO:0006631,GO:0008150,GO:0008152,GO:0009056,GO:0009062,GO:0009514,GO:0009987,GO:0015976,GO:0016042,GO:0016054,GO:0016740,GO:0016746,GO:0016999,GO:0017001,GO:0017144,GO:0019752,GO:0031907,GO:0031974,GO:0032787,GO:0042579,GO:0043226,GO:…	2.3.3.9	ko00620,ko00630,ko01100,ko01110,ko01120,ko01200,map00620,map00630,map01100,map01110,map01120,map01200	M00012	R00472	RC00004,RC00308,RC02747	ko00000,ko00001,ko00002,ko01000				Fungi	1GT3J@112252,38GR5@33154,3NX6Q@4751,COG2225@1,KOG1261@2759	NA|NA|NA	H
MA-00334-421	ICL1	ko:K01637	0.015838	6.0909	UP	Phosphoenolpyruvate phosphomutase	78898.MVEG_00745T0	9.4e-300	1035.4	Fungi incertae sedis	GO:0003674,GO:0003824,GO:0004451,GO:0005575,GO:0005622,GO:0005623,GO:0005737,GO:0005777,GO:0005782,GO:0005975,GO:0006081,GO:0006082,GO:0006083,GO:0006097,GO:0006629,GO:0006631,GO:0008150,GO:0008152,GO:0009056,GO:0009062,GO:0009987,GO:0015976,GO:0016042,GO:0016054,GO:0016829,GO:0016830,GO:0016833,GO:0016999,GO:0017001,GO:0017144,GO:0019752,GO:0031907,GO:0031974,GO:0032787,GO:0042579,GO:0043226,GO:…	4.1.3.1	ko00630,ko01100,ko01110,ko01120,ko01200,map00630,map01100,map01110,map01120,map01200	M00012	R00479	RC00311,RC00313	ko00000,ko00001,ko00002,ko01000				Fungi	1GV6P@112252,38CWA@33154,3NUMX@4751,COG2513@1,KOG1260@2759	NA|NA|NA	C
MA-00067-380	RHO1	ko:K04513,ko:K07975	0.081377	1.7439	NoChange	Rho (Ras homology) subfamily of Ras-like small GTPases	78898.MVEG_11893T0	1.2e-106	392.5	Fungi incertae sedis	GO:0000003,GO:0000131,GO:0000148,GO:0000166,GO:0000271,GO:0000278,GO:0000281,GO:0000910,GO:0000935,GO:0001411,GO:0001882,GO:0001883,GO:0003674,GO:0003824,GO:0003924,GO:0005488,GO:0005525,GO:0005575,GO:0005622,GO:0005623,GO:0005737,GO:0005739,GO:0005740,GO:0005741,GO:0005777,GO:0005783,GO:0005794,GO:0005886,GO:0005933,GO:0005934,GO:0005935,GO:0005937,GO:0005975,GO:0005976,GO:0006073,GO:0006074,GO:…		ko04011,ko04014,ko04015,ko04022,ko04024,ko04062,ko04071,ko04072,ko04144,ko04150,ko04270,ko04310,ko04350,ko04360,ko04510,ko04520,ko04530,ko04611,ko04621,ko04660,ko04670,ko04722,ko04810,ko04921,ko04972,ko05100,ko05130,ko05133,ko05152,ko05200,ko05203,ko05205,ko05206,ko05210,ko05418,map04011,map04014,map04015,map04022,map04024,map04062,map04071,map04072,map04144,map04150,map04270,map04310,map04350,ma…				ko00000,ko00001,ko04031,ko04131,ko04147				Fungi	1GRTR@112252,38B7E@33154,3NV4I@4751,COG1100@1,KOG0393@2759	NA|NA|NA	U
MA-00072-257	POT1	ko:K07513	0.033386	1.7845	NoChange	Thiolase, N-terminal domain	78898.MVEG_04796T0	1.9e-178	632.1	Fungi incertae sedis	GO:0003674,GO:0003676,GO:0003723,GO:0003729,GO:0003824,GO:0003988,GO:0005488,GO:0005575,GO:0005622,GO:0005623,GO:0005737,GO:0005739,GO:0005740,GO:0005758,GO:0005777,GO:0005782,GO:0006082,GO:0006629,GO:0006631,GO:0006635,GO:0008150,GO:0008152,GO:0009056,GO:0009062,GO:0009987,GO:0016042,GO:0016054,GO:0016408,GO:0016740,GO:0016746,GO:0016747,GO:0019395,GO:0019752,GO:0030258,GO:0031907,GO:0031967,GO:…	2.3.1.16	ko00071,ko00280,ko00592,ko01040,ko01100,ko01110,ko01130,ko01212,ko03320,ko04146,map00071,map00280,map00592,map01040,map01100,map01110,map01130,map01212,map03320,map04146	M00087,M00113	R00927,R01177,R03778,R03858,R03991,R04546,R04742,R04747,R07891,R07895,R07899,R07937,R07953	RC00004,RC00326,RC00405,RC01702,RC02728	ko00000,ko00001,ko00002,ko01000				Fungi	1GS1H@112252,38F89@33154,3NUEC@4751,COG0183@1,KOG1389@2759	NA|NA|NA	I
MA-00073-541	PEX6	ko:K13339	0.53423	0.78597	NoChange	ATPase family associated with various cellular activities (AAA)	78898.MVEG_06746T0	0	1925.2	Fungi incertae sedis	GO:0001302,GO:0001881,GO:0003674,GO:0003824,GO:0005488,GO:0005515,GO:0005575,GO:0005622,GO:0005623,GO:0005737,GO:0005777,GO:0005829,GO:0006082,GO:0006605,GO:0006625,GO:0006629,GO:0006631,GO:0006810,GO:0006886,GO:0006996,GO:0007031,GO:0007568,GO:0007569,GO:0008104,GO:0008150,GO:0008152,GO:0009987,GO:0015031,GO:0015833,GO:0015919,GO:0016043,GO:0016462,GO:0016558,GO:0016562,GO:0016787,GO:0016817,GO:…		ko04146,map04146				ko00000,ko00001,ko04131	3.A.20.1			Fungi	1GS7Z@112252,39HQ2@33154,3NVEI@4751,COG0464@1,KOG0736@2759	NA|NA|NA	O
MA-00074-2	PEX3	ko:K13336	0.53423	1.1466	NoChange	Peroxin-3	78898.MVEG_03448T0	3e-78	298.1	Fungi incertae sedis	GO:0003674,GO:0005488,GO:0005515,GO:0005575,GO:0005622,GO:0005623,GO:0005737,GO:0005777,GO:0005778,GO:0005783,GO:0006605,GO:0006612,GO:0006625,GO:0006810,GO:0006886,GO:0006996,GO:0007031,GO:0008104,GO:0008150,GO:0009987,GO:0012505,GO:0015031,GO:0015833,GO:0015919,GO:0016020,GO:0016043,GO:0017038,GO:0030674,GO:0031090,GO:0031903,GO:0032581,GO:0033036,GO:0033365,GO:0034613,GO:0042579,GO:0042886,GO:…		ko04146,map04146				ko00000,ko00001,ko04131	3.A.20.1,9.A.17.1			Fungi	1GSUT@112252,39U4Y@33154,3NZ41@4751,KOG4444@1,KOG4444@2759	NA|NA|NA	MU
MA-00090-169	GPD1	ko:K00006	0.034813	1.9264	NoChange	NAD-dependent glycerol-3-phosphate dehydrogenase C-terminus	78898.MVEG_08419T0	5.7e-186	656.8	Fungi incertae sedis	GO:0000166,GO:0003674,GO:0003824,GO:0004367,GO:0005488,GO:0005575,GO:0005622,GO:0005623,GO:0005634,GO:0005737,GO:0005739,GO:0005777,GO:0005829,GO:0005975,GO:0006066,GO:0006071,GO:0006072,GO:0006114,GO:0006116,GO:0006139,GO:0006605,GO:0006625,GO:0006725,GO:0006732,GO:0006733,GO:0006734,GO:0006753,GO:0006793,GO:0006796,GO:0006807,GO:0006810,GO:0006884,GO:0006886,GO:0006950,GO:0006970,GO:0006972,GO:…	1.1.1.8	ko00564,ko01110,ko04011,map00564,map01110,map04011		R00842	RC00029	ko00000,ko00001,ko01000				Fungi	1GV1N@112252,38E7F@33154,3NVN7@4751,COG0240@1,KOG2711@2759	NA|NA|NA	C
MA-00090-236	IDP1	ko:K00031	0.039852	0.60077	NoChange	Belongs to the isocitrate and isopropylmalate dehydrogenases family	78898.MVEG_03783T0	1.6e-230	805.1	Fungi	GO:0003674,GO:0003824,GO:0004448,GO:0004450,GO:0005575,GO:0005622,GO:0005623,GO:0005737,GO:0005739,GO:0005759,GO:0005777,GO:0005829,GO:0006082,GO:0006091,GO:0006099,GO:0006101,GO:0006102,GO:0006139,GO:0006520,GO:0006536,GO:0006537,GO:0006629,GO:0006631,GO:0006635,GO:0006725,GO:0006732,GO:0006733,GO:0006739,GO:0006740,GO:0006753,GO:0006793,GO:0006796,GO:0006807,GO:0008150,GO:0008152,GO:0008652,GO:…	1.1.1.42	ko00020,ko00480,ko00720,ko01100,ko01110,ko01120,ko01130,ko01200,ko01210,ko01230,ko04146,map00020,map00480,map00720,map01100,map01110,map01120,map01130,map01200,map01210,map01230,map04146	M00009,M00010,M00173,M00740	R00267,R00268,R01899	RC00001,RC00084,RC00114,RC00626,RC02801	br01601,ko00000,ko00001,ko00002,ko01000			iMM904.YLR174W,iND750.YLR174W	Fungi	38CG3@33154,3NVZ4@4751,COG0538@1,KOG1526@2759	NA|NA|NA	C
MA-00101-344	FAA2	ko:K01897	0.31063	2.4338	NoChange	Mortierella verticillata NRRL 6337	78898.MVEG_09056T0	3.8e-224	784.3	Fungi incertae sedis	GO:0001676,GO:0003674,GO:0003824,GO:0004467,GO:0005575,GO:0005622,GO:0005623,GO:0005737,GO:0005739,GO:0005777,GO:0006082,GO:0006629,GO:0006631,GO:0008150,GO:0008152,GO:0009987,GO:0015645,GO:0016405,GO:0016874,GO:0016877,GO:0016878,GO:0019752,GO:0031956,GO:0031957,GO:0032787,GO:0042579,GO:0043226,GO:0043227,GO:0043229,GO:0043231,GO:0043436,GO:0044237,GO:0044238,GO:0044255,GO:0044281,GO:0044424,GO:…	6.2.1.3	ko00061,ko00071,ko01100,ko01212,ko02024,ko03320,ko04146,ko04216,ko04714,ko04920,map00061,map00071,map01100,map01212,map02024,map03320,map04146,map04216,map04714,map04920	M00086	R01280	RC00004,RC00014	ko00000,ko00001,ko00002,ko01000,ko01004,ko04147	4.C.1.1			Fungi	1GSPT@112252,38BK9@33154,3NUAR@4751,COG1022@1,KOG1256@2759	NA|NA|NA	I
MA-00101-652	CAT2	ko:K00624	0.95609	0.98458	NoChange	Mortierella verticillata NRRL 6337 carnitine O-acetyltransferase (649 aa)	78898.MVEG_10940T0	0	1204.5	Fungi incertae sedis	GO:0003674,GO:0003824,GO:0004092,GO:0005575,GO:0005622,GO:0005623,GO:0005737,GO:0005739,GO:0005777,GO:0006575,GO:0006577,GO:0006807,GO:0008150,GO:0008152,GO:0008374,GO:0009437,GO:0009987,GO:0016406,GO:0016407,GO:0016413,GO:0016740,GO:0016746,GO:0016747,GO:0034641,GO:0042579,GO:0043226,GO:0043227,GO:0043229,GO:0043231,GO:0044237,GO:0044424,GO:0044444,GO:0044464,GO:0071704,GO:0097164,GO:1901564	2.3.1.7	ko04146,map04146		R02396	RC00004,RC00037	ko00000,ko00001,ko01000				Fungi	1GRU3@112252,38CAT@33154,3NUG1@4751,KOG3717@1,KOG3717@2759	NA|NA|NA	I
MA-00112-171	POX1	ko:K00232	0.11974	1.4331	NoChange	Acyl-CoA oxidase	78898.MVEG_05592T0	0	1340.5	Fungi incertae sedis	GO:0000166,GO:0003674,GO:0003824,GO:0003995,GO:0003997,GO:0005488,GO:0005575,GO:0005622,GO:0005623,GO:0005737,GO:0005777,GO:0005782,GO:0006082,GO:0006629,GO:0006631,GO:0006635,GO:0008150,GO:0008152,GO:0009056,GO:0009062,GO:0009987,GO:0016042,GO:0016054,GO:0016491,GO:0016627,GO:0016634,GO:0019395,GO:0019752,GO:0030258,GO:0031907,GO:0031974,GO:0032787,GO:0033539,GO:0033540,GO:0034440,GO:0036094,GO:…	1.3.3.6	ko00071,ko00592,ko01040,ko01100,ko01110,ko01212,ko03320,ko04024,ko04146,map00071,map00592,map01040,map01100,map01110,map01212,map03320,map04024,map04146	M00087,M00113	R01175,R01279,R03777,R03857,R03990,R04751,R04754,R07888,R07892,R07896,R07934,R07950	RC00052,RC00076	ko00000,ko00001,ko00002,ko01000				Fungi	1GSRH@112252,38BTU@33154,3NUCQ@4751,COG1960@1,KOG0136@2759	NA|NA|NA	I
MA-00112-46	FIS1	ko:K17969	0.88141	0.91707	NoChange	Has a role in mitochondrial fission	78898.MVEG_06221T0	1.5e-74	285.4	Fungi incertae sedis	GO:0000266,GO:0001300,GO:0005575,GO:0005622,GO:0005623,GO:0005737,GO:0005739,GO:0005740,GO:0005741,GO:0005777,GO:0006996,GO:0007005,GO:0007031,GO:0007568,GO:0007569,GO:0008150,GO:0009987,GO:0016020,GO:0016043,GO:0016559,GO:0019867,GO:0031090,GO:0031966,GO:0031967,GO:0031968,GO:0031975,GO:0032502,GO:0042579,GO:0043226,GO:0043227,GO:0043229,GO:0043231,GO:0044422,GO:0044424,GO:0044429,GO:0044444,GO:…		ko04137,ko04139,map04137,map04139				ko00000,ko00001,ko03029				Fungi	1GU7D@112252,3A3F6@33154,3P1Y3@4751,KOG3364@1,KOG3364@2759	NA|NA|NA	M
MA-00112-6	PEX5	ko:K12261,ko:K13342	0.81738	1.1022	NoChange	Tetratricopeptide repeat	78898.MVEG_01893T0	2.5e-231	808.1	Fungi incertae sedis	GO:0000268,GO:0003674,GO:0005048,GO:0005052,GO:0005488,GO:0005515,GO:0005575,GO:0005622,GO:0005623,GO:0005737,GO:0005777,GO:0005778,GO:0005829,GO:0006082,GO:0006605,GO:0006625,GO:0006629,GO:0006631,GO:0006635,GO:0006810,GO:0006886,GO:0006996,GO:0007031,GO:0008104,GO:0008150,GO:0008152,GO:0009056,GO:0009062,GO:0009987,GO:0015031,GO:0015833,GO:0015919,GO:0016020,GO:0016042,GO:0016043,GO:0016054,GO:…		ko04146,map04146				ko00000,ko00001,ko01000,ko04131	3.A.20.1			Fungi	1GSYA@112252,38C1T@33154,3NUGJ@4751,KOG1125@1,KOG1125@2759	NA|NA|NA	S
MA-00120-294	MSP1	ko:K01509	0.74681	0.77609	NoChange	AAA domain (Cdc48 subfamily)	78898.MVEG_08759T0	3.1e-190	671	Fungi incertae sedis	GO:0000166,GO:0003674,GO:0003824,GO:0005488,GO:0005524,GO:0005575,GO:0005622,GO:0005623,GO:0005634,GO:0005737,GO:0005739,GO:0005740,GO:0005741,GO:0005777,GO:0005778,GO:0006605,GO:0006626,GO:0006810,GO:0006839,GO:0006886,GO:0006996,GO:0007005,GO:0008104,GO:0008144,GO:0008150,GO:0009987,GO:0015031,GO:0015833,GO:0016020,GO:0016043,GO:0016462,GO:0016787,GO:0016817,GO:0016818,GO:0016887,GO:0017038,GO:…	3.6.1.3	ko00230,ko04742,map00230,map04742		R00086	RC00002	ko00000,ko00001,ko01000				Fungi	1GS1Y@112252,38C57@33154,3NVTE@4751,COG0464@1,KOG0737@2759	NA|NA|NA	O
MA-00139-237		ko:K00830	0.034813	0.54869	NoChange	Aminotransferase class-V	78898.MVEG_04472T0	4.4e-211	740.3	Fungi incertae sedis	GO:0001505,GO:0003674,GO:0003824,GO:0004760,GO:0005575,GO:0005622,GO:0005623,GO:0005737,GO:0005739,GO:0005777,GO:0005829,GO:0006082,GO:0006520,GO:0006544,GO:0006545,GO:0006807,GO:0008150,GO:0008152,GO:0008453,GO:0008483,GO:0008652,GO:0009058,GO:0009069,GO:0009070,GO:0009987,GO:0016053,GO:0016740,GO:0016769,GO:0017144,GO:0019265,GO:0019752,GO:0042133,GO:0042136,GO:0042579,GO:0043226,GO:0043227,GO:…	2.6.1.44,2.6.1.45,2.6.1.51	ko00250,ko00260,ko00630,ko00680,ko01100,ko01110,ko01120,ko01130,ko01200,ko04146,map00250,map00260,map00630,map00680,map01100,map01110,map01120,map01130,map01200,map04146	M00346,M00532	R00369,R00372,R00585,R00588	RC00006,RC00008,RC00018	ko00000,ko00001,ko00002,ko01000,ko01007				Fungi	1GSG5@112252,38BJD@33154,3NW05@4751,COG0075@1,KOG2862@2759	NA|NA|NA	E
MA-00139-47	TES1	ko:K01068,ko:K11992	0.95609	1.0145	NoChange	Thioesterase-like superfamily	78898.MVEG_10945T0	9.6e-145	519.6	Fungi incertae sedis	GO:0003674,GO:0003824,GO:0005575,GO:0005622,GO:0005623,GO:0005737,GO:0005739,GO:0005777,GO:0005782,GO:0006082,GO:0006139,GO:0006163,GO:0006629,GO:0006631,GO:0006635,GO:0006637,GO:0006725,GO:0006732,GO:0006753,GO:0006790,GO:0006793,GO:0006796,GO:0006807,GO:0008150,GO:0008152,GO:0009056,GO:0009062,GO:0009117,GO:0009150,GO:0009259,GO:0009987,GO:0016042,GO:0016054,GO:0016289,GO:0016787,GO:0016788,GO:…	3.1.2.2,3.1.2.27	ko00062,ko00120,ko01040,ko01100,ko01110,ko04146,map00062,map00120,map01040,map01100,map01110,map04146	M00104	R01274,R03974,R07296,R08174,R08175,R08176,R08177,R08178,R08179,R08180,R08181,R08182,R08183,R09450	RC00004,RC00014	ko00000,ko00001,ko00002,ko01000,ko01004				Fungi	1GTEY@112252,38GG7@33154,3NXST@4751,COG1946@1,KOG3016@2759	NA|NA|NA	I
MA-00153-132	VPS1	ko:K17065	0.95609	1.0099	NoChange	Mortierella verticillata NRRL 6337 vacuolar protein sorting-associated protein 1 (686 aa)	78898.MVEG_09588T0	0	1118.2	Fungi incertae sedis	GO:0000266,GO:0000322,GO:0000323,GO:0000324,GO:0000329,GO:0003373,GO:0003374,GO:0003674,GO:0003774,GO:0003824,GO:0003924,GO:0005488,GO:0005515,GO:0005575,GO:0005622,GO:0005623,GO:0005737,GO:0005739,GO:0005740,GO:0005741,GO:0005768,GO:0005770,GO:0005773,GO:0005774,GO:0005777,GO:0005829,GO:0005856,GO:0005938,GO:0006605,GO:0006623,GO:0006810,GO:0006886,GO:0006897,GO:0006996,GO:0007005,GO:0007010,GO:…	3.6.5.5	ko04139,ko04214,ko04217,ko04621,ko04668,map04139,map04214,map04217,map04621,map04668				ko00000,ko00001,ko01000,ko03029,ko04131,ko04147				Fungi	1GRXE@112252,38C4B@33154,3NU4R@4751,COG0699@1,KOG0446@2759	NA|NA|NA	U
MA-00153-208	DNM1	ko:K17065	0.044781	0.53958	NoChange	Mortierella verticillata NRRL 6337	78898.MVEG_08539T0	0	1287.3	Fungi incertae sedis	GO:0000001,GO:0000002,GO:0000166,GO:0000266,GO:0001300,GO:0001882,GO:0001883,GO:0003373,GO:0003374,GO:0003674,GO:0003774,GO:0003824,GO:0003924,GO:0005488,GO:0005515,GO:0005525,GO:0005575,GO:0005622,GO:0005623,GO:0005737,GO:0005739,GO:0005740,GO:0005741,GO:0005777,GO:0005829,GO:0006914,GO:0006928,GO:0006996,GO:0007005,GO:0007017,GO:0007018,GO:0007031,GO:0007568,GO:0007569,GO:0008017,GO:0008092,GO:…	3.6.5.5	ko04139,ko04214,ko04217,ko04621,ko04668,map04139,map04214,map04217,map04621,map04668				ko00000,ko00001,ko01000,ko03029,ko04131,ko04147				Fungi	1GV86@112252,38C4B@33154,3NU71@4751,COG0699@1,KOG0446@2759	NA|NA|NA	U
MA-00153-356		ko:K00626	0.13037	0.72214	NoChange	Thiolase, N-terminal domain	78898.MVEG_02032T0	8.6e-205	719.5	Fungi incertae sedis	GO:0003674,GO:0003824,GO:0003985,GO:0003988,GO:0005575,GO:0005622,GO:0005623,GO:0005737,GO:0005739,GO:0005777,GO:0006082,GO:0006629,GO:0006631,GO:0006635,GO:0008150,GO:0008152,GO:0009056,GO:0009062,GO:0009987,GO:0016042,GO:0016054,GO:0016407,GO:0016408,GO:0016453,GO:0016740,GO:0016746,GO:0016747,GO:0019395,GO:0019752,GO:0030258,GO:0032787,GO:0034440,GO:0042579,GO:0043226,GO:0043227,GO:0043229,GO:…	2.3.1.9	ko00071,ko00072,ko00280,ko00310,ko00362,ko00380,ko00620,ko00630,ko00640,ko00650,ko00720,ko00900,ko01100,ko01110,ko01120,ko01130,ko01200,ko01212,ko02020,map00071,map00072,map00280,map00310,map00362,map00380,map00620,map00630,map00640,map00650,map00720,map00900,map01100,map01110,map01120,map01130,map01200,map01212,map02020	M00088,M00095,M00373,M00374,M00375	R00238,R01177	RC00004,RC00326	ko00000,ko00001,ko00002,ko01000,ko04147				Fungi	1GSCQ@112252,38C4X@33154,3NV1W@4751,COG0183@1,KOG1390@2759	NA|NA|NA	I
MA-00153-498	CAT1	ko:K03781	0.83229	1.0748	NoChange	Occurs in almost all aerobically respiring organisms and serves to protect cells from the toxic effects of hydrogen peroxide	78898.MVEG_04764T0	2.6e-277	960.7	Fungi incertae sedis	GO:0000302,GO:0001306,GO:0001315,GO:0003674,GO:0003824,GO:0004096,GO:0004601,GO:0005488,GO:0005575,GO:0005618,GO:0005622,GO:0005623,GO:0005737,GO:0005739,GO:0005759,GO:0005777,GO:0005782,GO:0006950,GO:0006970,GO:0006979,GO:0007154,GO:0007568,GO:0007571,GO:0008150,GO:0008152,GO:0009056,GO:0009267,GO:0009277,GO:0009405,GO:0009605,GO:0009628,GO:0009636,GO:0009651,GO:0009987,GO:0009991,GO:0010035,GO:…	1.11.1.6	ko00380,ko00630,ko01110,ko01130,ko01200,ko04011,ko04016,ko04068,ko04146,ko04211,ko04212,ko04213,ko05014,map00380,map00630,map01110,map01130,map01200,map04011,map04016,map04068,map04146,map04211,map04212,map04213,map05014	M00532	R00009,R00602,R02670	RC00034,RC00767,RC02141,RC02755	ko00000,ko00001,ko00002,ko01000				Fungi	1GS3G@112252,38BMC@33154,3NUEX@4751,COG0753@1,KOG0047@2759	NA|NA|NA	P
MA-00153-526	FAA2	ko:K01897	0.086294	1.6289	NoChange	Mortierella verticillata NRRL 6337	78898.MVEG_01199T0	0	1248.8	Fungi incertae sedis	GO:0001676,GO:0003674,GO:0003824,GO:0004467,GO:0005575,GO:0005622,GO:0005623,GO:0005737,GO:0005739,GO:0005777,GO:0006082,GO:0006629,GO:0006631,GO:0008150,GO:0008152,GO:0009987,GO:0015645,GO:0016405,GO:0016874,GO:0016877,GO:0016878,GO:0019752,GO:0031956,GO:0031957,GO:0032787,GO:0042579,GO:0043226,GO:0043227,GO:0043229,GO:0043231,GO:0043436,GO:0044237,GO:0044238,GO:0044255,GO:0044281,GO:0044424,GO:…	6.2.1.3	ko00061,ko00071,ko01100,ko01212,ko02024,ko03320,ko04146,ko04216,ko04714,ko04920,map00061,map00071,map01100,map01212,map02024,map03320,map04146,map04216,map04714,map04920	M00086	R01280	RC00004,RC00014	ko00000,ko00001,ko00002,ko01000,ko01004,ko04147	4.C.1.1			Fungi	1GSPT@112252,38BK9@33154,3NUAR@4751,COG1022@1,KOG1256@2759	NA|NA|NA	I
MA-00162-260	PCD1		0.64656	0.70575	NoChange	Nudix domain-containing protein	78898.MVEG_11507T0	1.8e-70	272.7	Fungi	GO:0003674,GO:0003824,GO:0005575,GO:0005622,GO:0005623,GO:0005737,GO:0005777,GO:0005829,GO:0006139,GO:0006163,GO:0006259,GO:0006281,GO:0006725,GO:0006732,GO:0006753,GO:0006793,GO:0006796,GO:0006807,GO:0006950,GO:0006974,GO:0008150,GO:0008152,GO:0008413,GO:0009117,GO:0009150,GO:0009259,GO:0009987,GO:0015936,GO:0016462,GO:0016787,GO:0016817,GO:0016818,GO:0019637,GO:0019693,GO:0033554,GO:0033865,GO:…										Fungi	38MB0@33154,3NXJP@4751,COG0494@1,KOG3069@2759	NA|NA|NA	L
MA-00184-324	VPS1	ko:K17065	0.13037	0.59032	NoChange	Mortierella verticillata NRRL 6337 vacuolar protein sorting-associated protein 1 (686 aa)	78898.MVEG_09588T0	0	1129.4	Fungi incertae sedis	GO:0000266,GO:0000322,GO:0000323,GO:0000324,GO:0000329,GO:0003373,GO:0003374,GO:0003674,GO:0003774,GO:0003824,GO:0003924,GO:0005488,GO:0005515,GO:0005575,GO:0005622,GO:0005623,GO:0005737,GO:0005739,GO:0005740,GO:0005741,GO:0005768,GO:0005770,GO:0005773,GO:0005774,GO:0005777,GO:0005829,GO:0005856,GO:0005938,GO:0006605,GO:0006623,GO:0006810,GO:0006886,GO:0006897,GO:0006996,GO:0007005,GO:0007010,GO:…	3.6.5.5	ko04139,ko04214,ko04217,ko04621,ko04668,map04139,map04214,map04217,map04621,map04668				ko00000,ko00001,ko01000,ko03029,ko04131,ko04147				Fungi	1GRXE@112252,38C4B@33154,3NU4R@4751,COG0699@1,KOG0446@2759	NA|NA|NA	U
MA-00189-358	UBP15	ko:K11838	0.81738	1.078	NoChange	Ubiquitin carboxyl-terminal hydrolase	78898.MVEG_03301T0	0	1776.9	Fungi incertae sedis	GO:0003674,GO:0003824,GO:0004175,GO:0004843,GO:0005575,GO:0005622,GO:0005623,GO:0005634,GO:0005737,GO:0005777,GO:0005783,GO:0005829,GO:0006282,GO:0006464,GO:0006508,GO:0006807,GO:0008150,GO:0008152,GO:0008233,GO:0008234,GO:0009889,GO:0009890,GO:0009892,GO:0009987,GO:0010556,GO:0010558,GO:0010605,GO:0010992,GO:0010995,GO:0012505,GO:0016043,GO:0016579,GO:0016787,GO:0019219,GO:0019222,GO:0019538,GO:…	3.4.19.12	ko04068,ko05168,ko05169,ko05203,map04068,map05168,map05169,map05203				ko00000,ko00001,ko01000,ko01002,ko04121				Fungi	1GVTC@112252,38CVI@33154,3NWAD@4751,COG5077@1,KOG1863@2759	NA|NA|NA	O
MA-00189-403	BET4	ko:K14050	0.034813	1.5894	NoChange	Protein prenyltransferase alpha subunit repeat	78898.MVEG_03449T0	1.5e-273	948.7	Fungi incertae sedis	GO:0003674,GO:0003824,GO:0004659,GO:0004661,GO:0004663,GO:0005488,GO:0005515,GO:0005575,GO:0005622,GO:0005623,GO:0005737,GO:0005777,GO:0005829,GO:0005968,GO:0006464,GO:0006605,GO:0006612,GO:0006807,GO:0006810,GO:0006886,GO:0006888,GO:0008104,GO:0008150,GO:0008152,GO:0008318,GO:0009987,GO:0015031,GO:0015833,GO:0016192,GO:0016740,GO:0016765,GO:0017016,GO:0017137,GO:0018342,GO:0018344,GO:0019538,GO:…	2.5.1.60					ko00000,ko01000,ko01006,ko04131				Fungi	1GUBK@112252,38GJ5@33154,3NYGW@4751,COG5536@1,KOG0529@2759	NA|NA|NA	O
MA-00210-262	ECM4	ko:K07393	0.053181	5.8355	NoChange	Mortierella verticillata NRRL 6337 glutathione S-transferase	78898.MVEG_05171T0	9.7e-164	582.8	Fungi incertae sedis	GO:0003674,GO:0003824,GO:0004364,GO:0005575,GO:0005622,GO:0005623,GO:0005737,GO:0005777,GO:0006518,GO:0006575,GO:0006749,GO:0006790,GO:0006807,GO:0008150,GO:0008152,GO:0009987,GO:0016740,GO:0016765,GO:0034641,GO:0042579,GO:0043226,GO:0043227,GO:0043229,GO:0043231,GO:0043603,GO:0044237,GO:0044424,GO:0044444,GO:0044464,GO:0051186,GO:0071704,GO:1901564	1.8.5.7					ko00000,ko01000				Fungi	1GT82@112252,38BQT@33154,3NTZJ@4751,COG0435@1,KOG2903@2759	NA|NA|NA	O
MA-00213-249	STR3	ko:K01760	0.24576	0.45792	NoChange	Cys/Met metabolism PLP-dependent enzyme	78898.MVEG_02885T0	2.3e-218	764.6	Fungi incertae sedis	GO:0000096,GO:0000097,GO:0003674,GO:0003824,GO:0003962,GO:0004121,GO:0004123,GO:0005488,GO:0005575,GO:0005622,GO:0005623,GO:0005634,GO:0005737,GO:0005777,GO:0006082,GO:0006520,GO:0006534,GO:0006555,GO:0006790,GO:0006807,GO:0008144,GO:0008150,GO:0008152,GO:0008652,GO:0009058,GO:0009066,GO:0009067,GO:0009069,GO:0009070,GO:0009086,GO:0009092,GO:0009987,GO:0016053,GO:0016740,GO:0016765,GO:0016829,GO:…	4.4.1.8	ko00270,ko00450,ko01100,ko01110,ko01230,map00270,map00450,map01100,map01110,map01230	M00017	R00782,R01286,R02408,R04941	RC00056,RC00069,RC00382,RC00488,RC00710,RC01245,RC02303	ko00000,ko00001,ko00002,ko01000				Fungi	1GS56@112252,38CST@33154,3NW0R@4751,COG0626@1,KOG0053@2759	NA|NA|NA	E
MA-00213-310	FAA2	ko:K01897	0.16477	0.6018	NoChange	AMP-binding enzyme	78898.MVEG_10069T0	1.3e-303	1048.5	Fungi incertae sedis	GO:0001676,GO:0003674,GO:0003824,GO:0004467,GO:0005575,GO:0005622,GO:0005623,GO:0005737,GO:0005739,GO:0005777,GO:0006082,GO:0006629,GO:0006631,GO:0008150,GO:0008152,GO:0009987,GO:0015645,GO:0016405,GO:0016874,GO:0016877,GO:0016878,GO:0019752,GO:0031956,GO:0031957,GO:0032787,GO:0042579,GO:0043226,GO:0043227,GO:0043229,GO:0043231,GO:0043436,GO:0044237,GO:0044238,GO:0044255,GO:0044281,GO:0044424,GO:…	6.2.1.3	ko00061,ko00071,ko01100,ko01212,ko02024,ko03320,ko04146,ko04216,ko04714,ko04920,map00061,map00071,map01100,map01212,map02024,map03320,map04146,map04216,map04714,map04920	M00086	R01280	RC00004,RC00014	ko00000,ko00001,ko00002,ko01000,ko01004,ko04147	4.C.1.1			Fungi	1GT95@112252,38BK9@33154,3NUAR@4751,COG1022@1,KOG1256@2759	NA|NA|NA	I
MA-00268-24	CIT1	ko:K01647	0.13037	0.84519	NoChange	Citrate synthase, C-terminal domain	78898.MVEG_01922T0	4.4e-253	880.2	Fungi incertae sedis	GO:0003674,GO:0003824,GO:0004108,GO:0005575,GO:0005622,GO:0005623,GO:0005737,GO:0005739,GO:0005759,GO:0005777,GO:0005975,GO:0006081,GO:0006082,GO:0006084,GO:0006091,GO:0006097,GO:0006099,GO:0006101,GO:0006139,GO:0006163,GO:0006195,GO:0006520,GO:0006536,GO:0006537,GO:0006637,GO:0006725,GO:0006732,GO:0006753,GO:0006790,GO:0006793,GO:0006796,GO:0006807,GO:0008150,GO:0008152,GO:0008652,GO:0009056,GO:…	2.3.3.1	ko00020,ko00630,ko01100,ko01110,ko01120,ko01130,ko01200,ko01210,ko01230,map00020,map00630,map01100,map01110,map01120,map01130,map01200,map01210,map01230	M00009,M00010,M00012,M00740	R00351	RC00004,RC00067	br01601,ko00000,ko00001,ko00002,ko01000				Fungi	1GSDT@112252,38CK5@33154,3NU5Z@4751,COG0372@1,KOG2617@2759	NA|NA|NA	C
MA-00297-214	GPD1	ko:K00006	0.31063	1.3058	NoChange	NAD-dependent glycerol-3-phosphate dehydrogenase C-terminus	78898.MVEG_03870T0	9.1e-176	622.9	Fungi incertae sedis	GO:0000166,GO:0003674,GO:0003824,GO:0004367,GO:0005488,GO:0005575,GO:0005622,GO:0005623,GO:0005634,GO:0005737,GO:0005739,GO:0005777,GO:0005829,GO:0005975,GO:0006066,GO:0006071,GO:0006072,GO:0006114,GO:0006116,GO:0006139,GO:0006605,GO:0006625,GO:0006725,GO:0006732,GO:0006733,GO:0006734,GO:0006753,GO:0006793,GO:0006796,GO:0006807,GO:0006810,GO:0006884,GO:0006886,GO:0006950,GO:0006970,GO:0006972,GO:…	1.1.1.8	ko00564,ko01110,ko04011,map00564,map01110,map04011		R00842	RC00029	ko00000,ko00001,ko01000				Fungi	1GV1N@112252,38E7F@33154,3NVN7@4751,COG0240@1,KOG2711@2759	NA|NA|NA	C
MA-00320-43	CIT1	ko:K01647	0.25912	1.9942	NoChange	Citrate synthase, C-terminal domain	78898.MVEG_01922T0	3.3e-217	760.8	Fungi incertae sedis	GO:0003674,GO:0003824,GO:0004108,GO:0005575,GO:0005622,GO:0005623,GO:0005737,GO:0005739,GO:0005759,GO:0005777,GO:0005975,GO:0006081,GO:0006082,GO:0006084,GO:0006091,GO:0006097,GO:0006099,GO:0006101,GO:0006139,GO:0006163,GO:0006195,GO:0006520,GO:0006536,GO:0006537,GO:0006637,GO:0006725,GO:0006732,GO:0006753,GO:0006790,GO:0006793,GO:0006796,GO:0006807,GO:0008150,GO:0008152,GO:0008652,GO:0009056,GO:…	2.3.3.1	ko00020,ko00630,ko01100,ko01110,ko01120,ko01130,ko01200,ko01210,ko01230,map00020,map00630,map01100,map01110,map01120,map01130,map01200,map01210,map01230	M00009,M00010,M00012,M00740	R00351	RC00004,RC00067	br01601,ko00000,ko00001,ko00002,ko01000				Fungi	1GSDT@112252,38CK5@33154,3NU5Z@4751,COG0372@1,KOG2617@2759	NA|NA|NA	C
MA-00334-315	FAA2	ko:K01897	0.77111	0.87391	NoChange	AMP-binding enzyme	78898.MVEG_00917T0	0	1093.2	Fungi incertae sedis	GO:0001676,GO:0003674,GO:0003824,GO:0004467,GO:0005575,GO:0005622,GO:0005623,GO:0005737,GO:0005739,GO:0005777,GO:0006082,GO:0006629,GO:0006631,GO:0008150,GO:0008152,GO:0009987,GO:0015645,GO:0016405,GO:0016874,GO:0016877,GO:0016878,GO:0019752,GO:0031956,GO:0031957,GO:0032787,GO:0042579,GO:0043226,GO:0043227,GO:0043229,GO:0043231,GO:0043436,GO:0044237,GO:0044238,GO:0044255,GO:0044281,GO:0044424,GO:…	6.2.1.3	ko00061,ko00071,ko01100,ko01212,ko02024,ko03320,ko04146,ko04216,ko04714,ko04920,map00061,map00071,map01100,map01212,map02024,map03320,map04146,map04216,map04714,map04920	M00086	R01280	RC00004,RC00014	ko00000,ko00001,ko00002,ko01000,ko01004,ko04147	4.C.1.1			Fungi	1GT95@112252,38BK9@33154,3NUAR@4751,COG1022@1,KOG1256@2759	NA|NA|NA	I
MA-00334-351	PEX11	ko:K13352	0.95609	1.0743	NoChange	Peroxisomal biogenesis factor 11 (PEX11)	78898.MVEG_00971T0	3.5e-97	361.3	Fungi incertae sedis	GO:0005575,GO:0005622,GO:0005623,GO:0005737,GO:0005777,GO:0005778,GO:0005783,GO:0006082,GO:0006629,GO:0006631,GO:0006996,GO:0007031,GO:0008150,GO:0008152,GO:0009987,GO:0012505,GO:0016020,GO:0016043,GO:0016559,GO:0019395,GO:0019752,GO:0030258,GO:0031090,GO:0031903,GO:0032535,GO:0032787,GO:0032991,GO:0034440,GO:0042579,GO:0043226,GO:0043227,GO:0043229,GO:0043231,GO:0043436,GO:0044237,GO:0044238,GO:…		ko04146,map04146				ko00000,ko00001,ko02000	1.A.101.1,3.A.20.1.1			Fungi	1GTTB@112252,38B7Q@33154,3NWIA@4751,KOG4186@1,KOG4186@2759	NA|NA|NA	U
MA-00073-134	uaZ	ko:K00365	0.039852	0.18374	DOWN	Catalyzes the oxidation of uric acid to 5- hydroxyisourate, which is further processed to form (S)-allantoin	78898.MVEG_10937T0	4.6e-166	590.5	Fungi incertae sedis	GO:0003674,GO:0003824,GO:0004846,GO:0005575,GO:0005576,GO:0005622,GO:0005623,GO:0005737,GO:0005777,GO:0006139,GO:0006144,GO:0006145,GO:0006725,GO:0006807,GO:0008150,GO:0008152,GO:0009056,GO:0009112,GO:0009987,GO:0016491,GO:0016661,GO:0016663,GO:0019439,GO:0019627,GO:0034641,GO:0042579,GO:0043226,GO:0043227,GO:0043229,GO:0043231,GO:0043603,GO:0044237,GO:0044238,GO:0044248,GO:0044270,GO:0044281,GO:…	1.7.3.3	ko00230,ko00232,ko01100,ko01120,map00230,map00232,map01100,map01120	M00546	R02106,R07981	RC02107,RC02551	ko00000,ko00001,ko00002,ko01000				Fungi	1GTB2@112252,38FJ4@33154,3NWXW@4751,COG3648@1,KOG1599@2759	NA|NA|NA	Q
MA-00184-381	FAA2	ko:K01897	0.034029	0.29855	DOWN	Mortierella verticillata NRRL 6337 （long-chain acyl-CoA synthetase [EC:6.2.1.3]）	78898.MVEG_07213T0	9.2e-276	956.1	Fungi incertae sedis	GO:0001676,GO:0003674,GO:0003824,GO:0004467,GO:0005575,GO:0005622,GO:0005623,GO:0005737,GO:0005739,GO:0005777,GO:0006082,GO:0006629,GO:0006631,GO:0008150,GO:0008152,GO:0009987,GO:0015645,GO:0016405,GO:0016874,GO:0016877,GO:0016878,GO:0019752,GO:0031956,GO:0031957,GO:0032787,GO:0042579,GO:0043226,GO:0043227,GO:0043229,GO:0043231,GO:0043436,GO:0044237,GO:0044238,GO:0044255,GO:0044281,GO:0044424,GO:…	6.2.1.3	ko00061,ko00071,ko01100,ko01212,ko02024,ko03320,ko04146,ko04216,ko04714,ko04920,map00061,map00071,map01100,map01212,map02024,map03320,map04146,map04216,map04714,map04920	M00086	R01280	RC00004,RC00014	ko00000,ko00001,ko00002,ko01000,ko01004,ko04147	4.C.1.1			Fungi	1GSPT@112252,38BK9@33154,3NUAR@4751,COG1022@1,KOG1256@2759	NA|NA|NA	I
MA-00297-491	IDP1	ko:K00031	0.017763	0.31019	DOWN	Belongs to the isocitrate and isopropylmalate dehydrogenases family （isocitrate dehydrogenase [EC:1.1.1.42]）	78898.MVEG_03783T0	2.1e-216	758.1	Fungi	GO:0003674,GO:0003824,GO:0004448,GO:0004450,GO:0005575,GO:0005622,GO:0005623,GO:0005737,GO:0005739,GO:0005759,GO:0005777,GO:0005829,GO:0006082,GO:0006091,GO:0006099,GO:0006101,GO:0006102,GO:0006139,GO:0006520,GO:0006536,GO:0006537,GO:0006629,GO:0006631,GO:0006635,GO:0006725,GO:0006732,GO:0006733,GO:0006739,GO:0006740,GO:0006753,GO:0006793,GO:0006796,GO:0006807,GO:0008150,GO:0008152,GO:0008652,GO:…	1.1.1.42	ko00020,ko00480,ko00720,ko01100,ko01110,ko01120,ko01130,ko01200,ko01210,ko01230,ko04146,map00020,map00480,map00720,map01100,map01110,map01120,map01130,map01200,map01210,map01230,map04146	M00009,M00010,M00173,M00740	R00267,R00268,R01899	RC00001,RC00084,RC00114,RC00626,RC02801	br01601,ko00000,ko00001,ko00002,ko01000			iMM904.YLR174W,iND750.YLR174W	Fungi	38CG3@33154,3NVZ4@4751,COG0538@1,KOG1526@2759	NA|NA|NA	C

## Sheet: Sheet3
Query_name	Preferred_name	KEGG KO	P.Value	Fold.Change	Threshold	description	Seed ortholog	e-value	score	best tax lvl	GO terms	EC number	KEGG pathway	KEGG module	KEGG reaction	KEGG rclass	BRITE	KEGG TC	CAZy	BiGG reaction	annot lvl	matching OGs	Best OG	COG cat
MA-00073-10	SSA2	ko:K03283	0.016605	64.673	UP	MreB/Mbl protein（Endocytosis）	78898.MVEG_09750T0	0	1146	Fungi incertae sedis	GO:0000049,GO:0000060,GO:0000166,GO:0000209,GO:0000322,GO:0000323,GO:0000324,GO:0000329,GO:0002181,GO:0002376,GO:0003674,GO:0003676,GO:0003723,GO:0003824,GO:0005488,GO:0005515,GO:0005524,GO:0005575,GO:0005576,GO:0005618,GO:0005622,GO:0005623,GO:0005634,GO:0005681,GO:0005737,GO:0005739,GO:0005773,GO:0005774,GO:0005829,GO:0005844,GO:0005886,GO:0006403,GO:0006404,GO:0006412,GO:0006457,GO:0006464,GO:…		ko03040,ko04010,ko04141,ko04144,ko04213,ko04612,ko04915,ko05134,ko05145,ko05162,ko05164,ko05169,map03040,map04010,map04141,map04144,map04213,map04612,map04915,map05134,map05145,map05162,map05164,map05169	M00353,M00355			ko00000,ko00001,ko00002,ko01009,ko03009,ko03029,ko03041,ko03051,ko03110,ko04131,ko04147,ko04516	1.A.33.1			Fungi	1GWB2@112252,38BSZ@33154,3NVJE@4751,COG0443@1,KOG0101@2759	NA|NA|NA	O
MA-00090-181	AMS1	ko:K01191	0.0038681	9.9805	UP	Alpha mannosidase, middle domain （Autophagy Cytoplasm to vacuolar targeting (CVT) pathway）	78898.MVEG_08486T0	0	1545.4	Fungi incertae sedis	GO:0000322,GO:0000323,GO:0000324,GO:0000329,GO:0003674,GO:0003824,GO:0004553,GO:0004559,GO:0005575,GO:0005622,GO:0005623,GO:0005737,GO:0005773,GO:0005774,GO:0005975,GO:0005996,GO:0006013,GO:0006464,GO:0006517,GO:0006807,GO:0008150,GO:0008152,GO:0009056,GO:0009100,GO:0009311,GO:0009313,GO:0009987,GO:0015923,GO:0016020,GO:0016052,GO:0016787,GO:0016798,GO:0019318,GO:0019538,GO:0031090,GO:0036211,GO:…	3.2.1.24	ko00511,map00511				ko00000,ko00001,ko01000,ko04131		GH38		Fungi	1GSE3@112252,38EQ8@33154,3NW9D@4751,COG0383@1,KOG4342@2759	NA|NA|NA	G
MA-00213-12	PHO8	ko:K01077	0.0098463	7.6075	UP	Alkaline phosphatase homologues	78898.MVEG_05691T0	4.4e-188	664.5	Fungi incertae sedis	GO:0000322,GO:0000323,GO:0000324,GO:0000329,GO:0003674,GO:0003824,GO:0004035,GO:0005575,GO:0005622,GO:0005623,GO:0005737,GO:0005773,GO:0005774,GO:0006139,GO:0006464,GO:0006470,GO:0006725,GO:0006732,GO:0006733,GO:0006753,GO:0006793,GO:0006796,GO:0006807,GO:0008150,GO:0008152,GO:0009117,GO:0009987,GO:0016020,GO:0016311,GO:0016787,GO:0016788,GO:0016791,GO:0019362,GO:0019538,GO:0019637,GO:0031090,GO:…	3.1.3.1	ko00730,ko00790,ko01100,ko02020,map00730,map00790,map01100,map02020	M00126	R02135,R04620	RC00017	ko00000,ko00001,ko00002,ko00537,ko01000,ko04147				Fungi	1GSA3@112252,38GD6@33154,3NUPA@4751,COG1785@1,COG3142@1,KOG4013@2759,KOG4126@2759	NA|NA|NA	P
MA-00320-46			0.027906	7.3039	UP	Domain involved in innate immunity and lipid metabolism.	78898.MVEG_11510T0	1.3e-36	159.5	Fungi incertae sedis	GO:0000322,GO:0000323,GO:0000324,GO:0000328,GO:0005575,GO:0005622,GO:0005623,GO:0005737,GO:0005773,GO:0005775,GO:0006810,GO:0006869,GO:0008150,GO:0009987,GO:0010876,GO:0015850,GO:0015918,GO:0016043,GO:0031974,GO:0032365,GO:0032366,GO:0033036,GO:0043226,GO:0043227,GO:0043229,GO:0043231,GO:0043233,GO:0044422,GO:0044424,GO:0044437,GO:0044444,GO:0044446,GO:0044464,GO:0046907,GO:0051179,GO:0051234,GO:…										Fungi	1GUAG@112252,3A444@33154,3P3WJ@4751,KOG4680@1,KOG4680@2759	NA|NA|NA	S
MA-00162-387		ko:K21989	0.020226	5.3824	UP	Cytosolic domain of 10TM putative phosphate transporter	78898.MVEG_07782T0	4e-308	1063.9	Fungi incertae sedis	GO:0000322,GO:0000323,GO:0000324,GO:0000329,GO:0003674,GO:0005215,GO:0005216,GO:0005227,GO:0005261,GO:0005575,GO:0005622,GO:0005623,GO:0005737,GO:0005773,GO:0005774,GO:0005783,GO:0006810,GO:0006811,GO:0006812,GO:0006816,GO:0008150,GO:0008324,GO:0012505,GO:0015075,GO:0015085,GO:0015267,GO:0015318,GO:0016020,GO:0016021,GO:0022803,GO:0022836,GO:0022838,GO:0022839,GO:0022857,GO:0022890,GO:0030001,GO:…						ko00000,ko02000				Fungi	1GT6A@112252,38CBQ@33154,3NY6R@4751,COG5594@1,KOG1134@2759	NA|NA|NA	S
MA-00297-530	PHM7	ko:K21989	0.02446	4.4645	UP	Mortierella verticillata NRRL 6337	78898.MVEG_07843T0	1.2e-258	899.4	Fungi incertae sedis	GO:0000322,GO:0000323,GO:0000324,GO:0000329,GO:0005575,GO:0005622,GO:0005623,GO:0005737,GO:0005773,GO:0005774,GO:0005783,GO:0006810,GO:0006892,GO:0006893,GO:0008150,GO:0012505,GO:0016020,GO:0016021,GO:0016192,GO:0031090,GO:0031224,GO:0043226,GO:0043227,GO:0043229,GO:0043231,GO:0044422,GO:0044424,GO:0044425,GO:0044437,GO:0044444,GO:0044446,GO:0044464,GO:0048193,GO:0051179,GO:0051234,GO:0071944,GO:…						ko00000,ko02000				Fungi	1GSZP@112252,38BVW@33154,3NW23@4751,COG5594@1,KOG1134@2759	NA|NA|NA	S
[truncated: 112 more rows]

## Sheet: Sheet4
Query_name	Preferred_name	KEGG KO	P.Value	Fold.Change	Threshold	description	Seed ortholog	e-value	score	best tax lvl	GO terms	EC number	KEGG pathway	KEGG module	KEGG reaction	KEGG rclass	BRITE	KEGG TC	CAZy	BiGG reaction	annot lvl	matching OGs	Best OG	COG cat
[truncated: 159 more rows]

[truncated: 1 more sheets: ReadMe]
